# Supplementary material
Source: PubMed Central journal article supplement (PMC5554885)

## Supplementary Methods

### Data Acquisition and Preparation

Drug dose response data were downloaded from the CCLE (February 20, 2012; *CCLE\_NP24.2009\_Drug\_data\_2012.02.20.csv*) and CGP (Release 5, June 2014; *gdsc\_drug\_sensitivity\_raw\_data\_w5.csv*) repositories and parsed to find matching cell line names. Original data files available upon request. As some cell lines have multiple names, several of the cell lines were matched manually to ensure maximal correspondence between the two databases. This identified 285 shared cell lines between CCLE and CGP (*CreateIntDataSheets.m*). The data were also parsed according to shared drugs (15). Viability values from CCLE were converted to percent viability by simply adding 100 to each value. In CGP, viability values possessed corresponding drug-free control wells (cells only) as well as drug- and cell-free wells. Viability values from CGP were converted to percent viability by subtracting the mean value from drug- and cell-free wells, dividing by the mean value from drug-free wells (which also has the mean value from drug- and cell-free wells subtracted), and then multiplying by 100.

### Defining the Shared Dose Range

CCLE and CGP use different drug dose ranges. All drugs in CCLE have eight doses between 8  $\mu\text{M}$  to 2.5 nM. Drugs in CGP each have different drug dose ranges for a total of nine doses, prepared by two-fold serial dilution. Because we wanted to compare the two databases within a similar drug dose range, the shared dose range boundary data points from each database were defined such that (i) the maximum number of data points from each database were used and (ii) the boundary data points from each database were as close to each other as possible (*FindSharedDoseRange.m*).

### Calculation of Slope ( $m$ ) and Area Under the Curve (AUC) Values

We calculated slope using the `polyfit` function and AUC using the `trapz` function in MATLAB. The x-values corresponded to  $\log_{10}$  dose values. Because different drugs possess different drug dose ranges, we normalized slope and area under the curve to facilitate their comparison (*Calculatems.m* and *CalculateAUCs.m*, respectively). To normalize slope, we multiplied by the difference between the  $\log_{10}$  of the maximum and minimum drug dose within the shared dose range, and divided by 100. To normalize AUC we divided by the difference between the  $\log_{10}$  of the maximum and minimum drug dose within the shared dose range, and divided by 100.

### SVM Machine Learning

The SVM classifier was trained with the MATLAB function `fitcsvm` (The Mathworks, Natick, MA) using a linear kernel. Predictors were the  $m_s$  and  $AUC_s$  measurements and the class labels were the average of the eight manual curator ratings of sensitivity or insensitivity rounded to the nearest integer (majority rules model).

### Re-Calculating $IC_{50}$ Values

$IC_{50}$  values were re-calculated for every dose response curve in CCLE and CGP that was classified as sensitive in either database for the shared dose range only. A hill function was fit to the data using the MATLAB function `lsqcurvefit` and an  $IC_{50}$  was calculated

only if the hill function crossed the 50% viability line within the shared dose range, and otherwise omitted (`CalculateIC50SharedRange.m`).

### **Randomizing Dose Responses for Manual Curation**

All of the dose response curves from the shared cell lines and drugs in CCLE and CGP (2520 curves from each study = 5040 total curves) were randomized such that each curator rated them in a unique order, using the MATLAB function `randperm`. Each curve was given a unique sequence of numbers that identified which database it was from and which cell line and drug was used. The manual curators were not given the key. The curators were only shown data that fell within the shared dose range (see Extended Data Figure 2 for an example page).

### **Producing Figures**

All data analysis and figure preparation was done using MATLAB. The main figures can be reproduced using `FiguresMain.m` and the extended data figures using `FiguresExtendedData.m` which make use of custom made functions as well as a few downloaded from others<sup>1,2,3</sup>. All scripts and data needed to reproduce the figures are supplied as Supplementary Data File 2.

## References

1. Cardillo G. (2007) Cohen's kappa: compute the Cohen's kappa ratio on a 2x2 matrix. <http://www.mathworks.com/matlabcentral/fileexchange/15365>
2. Charles (2011) cbrewer : colorbrewer schemes for Matlab. <http://www.mathworks.com/matlabcentral/fileexchange/34087>
3. Sanchez A. (2005) scatplot. <http://www.mathworks.com/matlabcentral/fileexchange/8577>

# 8-MG-BA

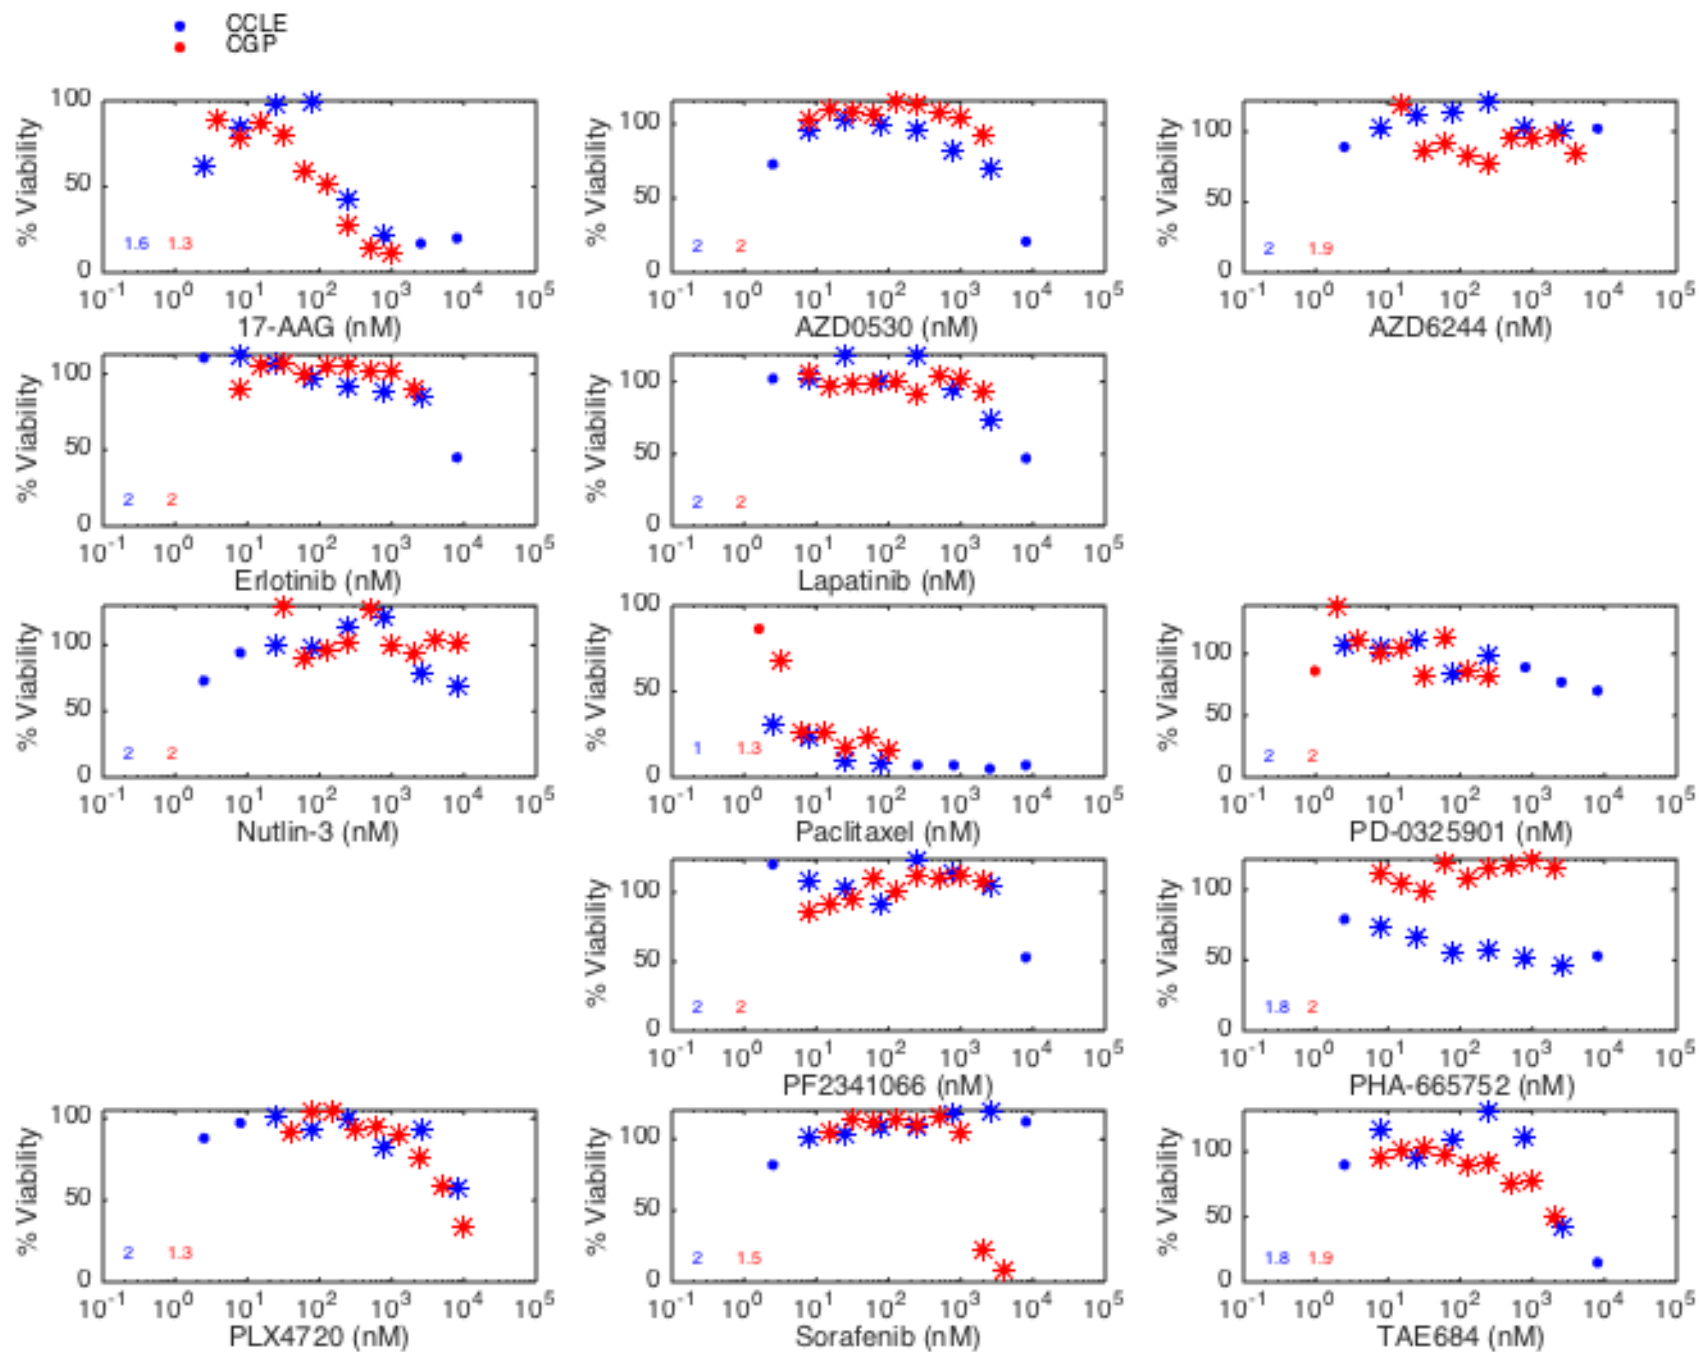

# SHP-77

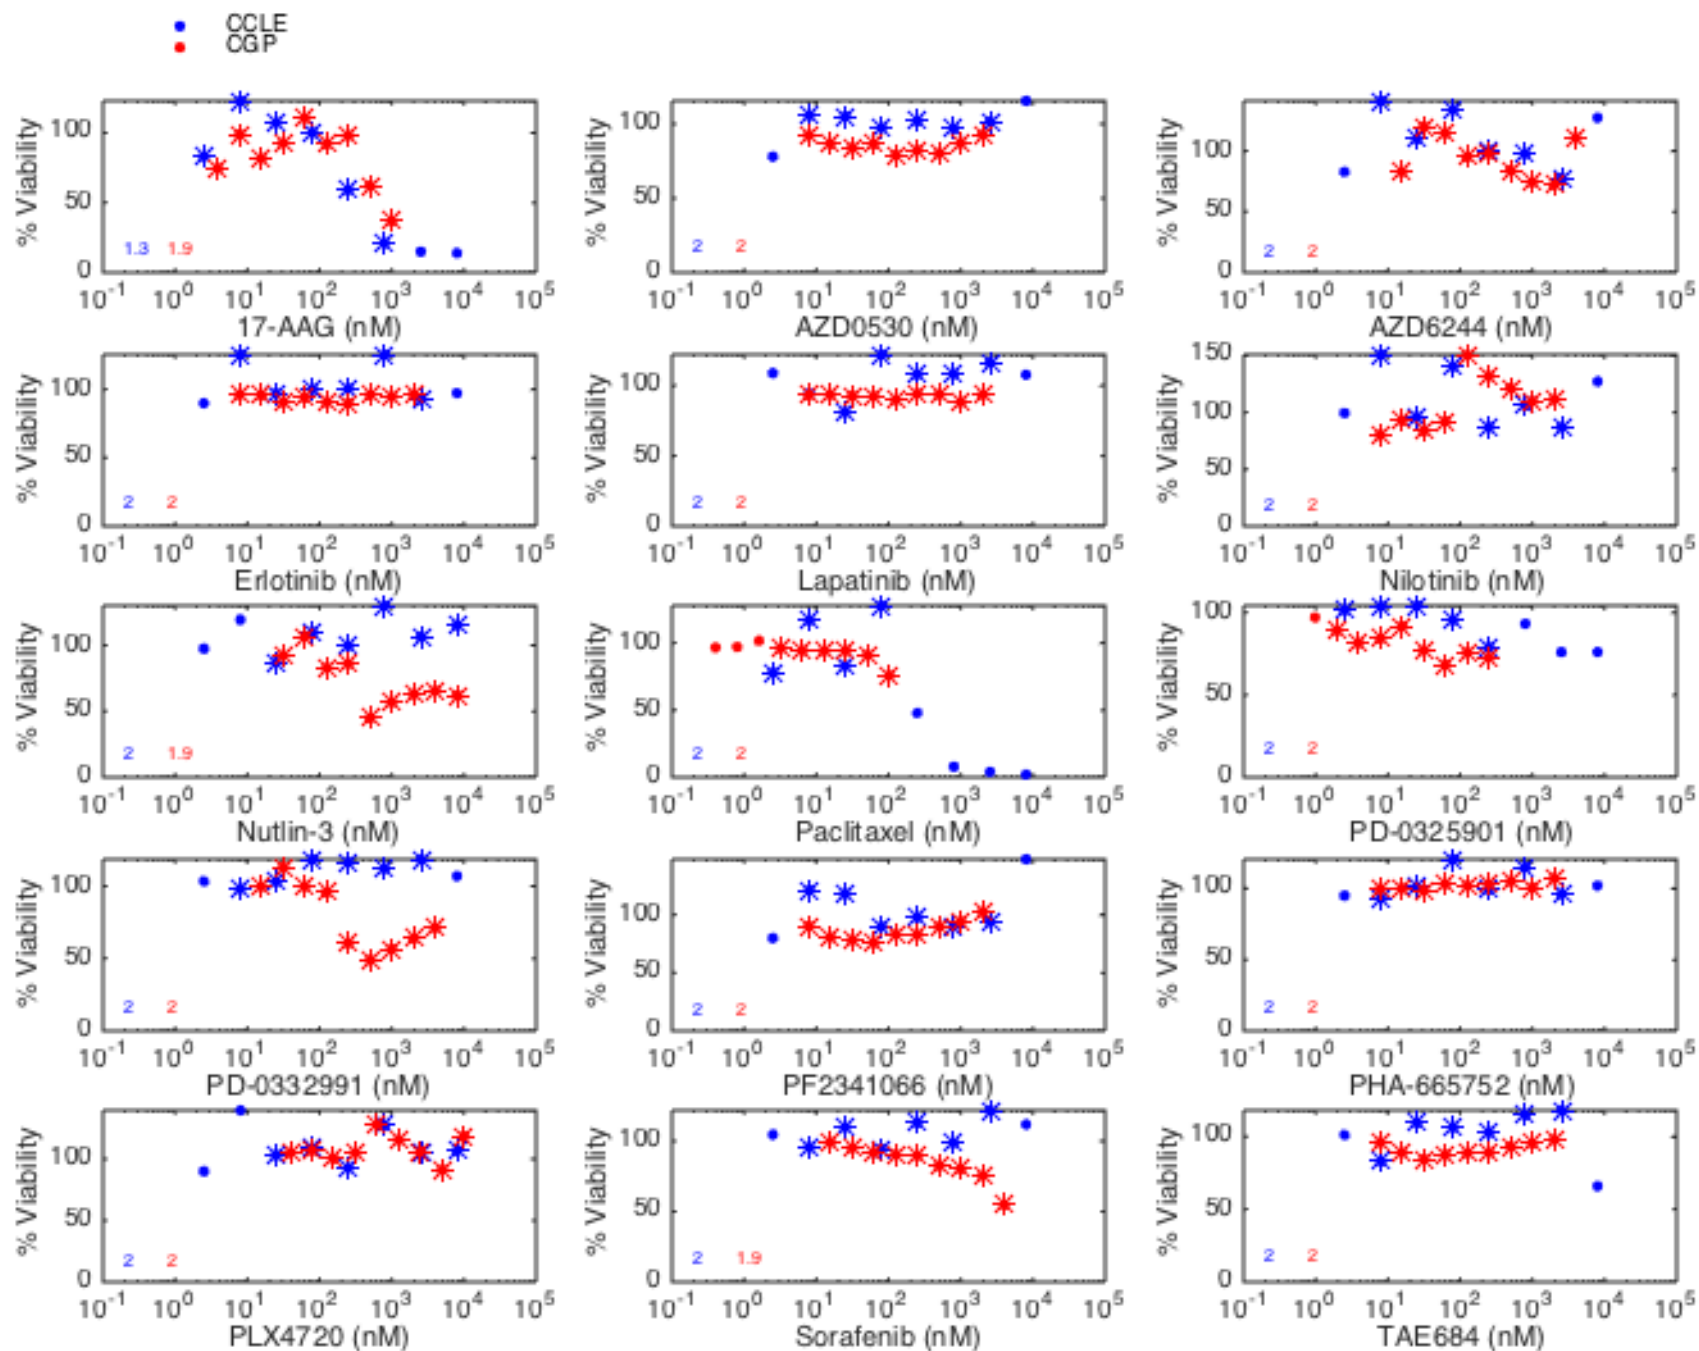

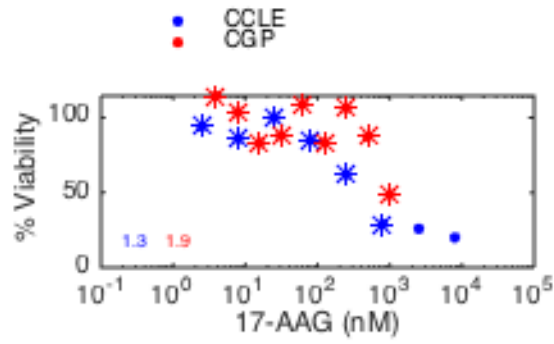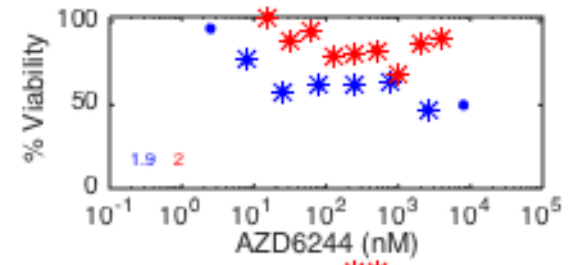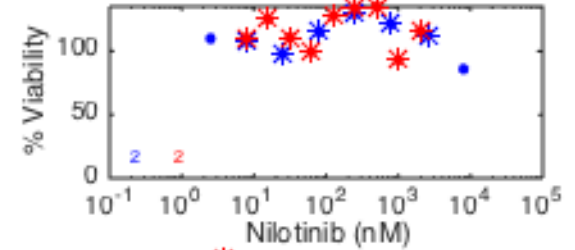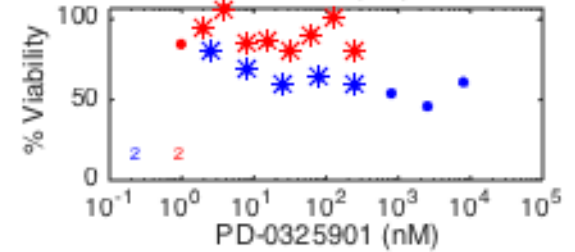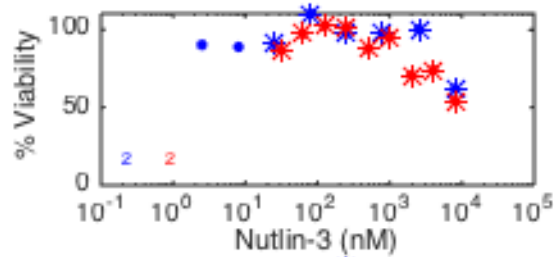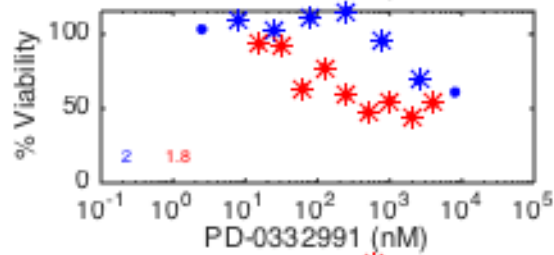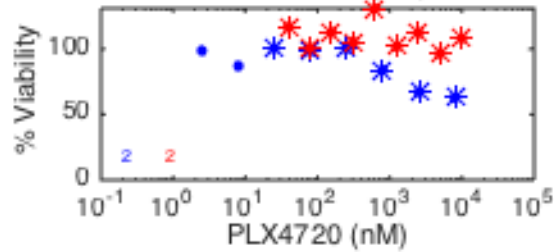

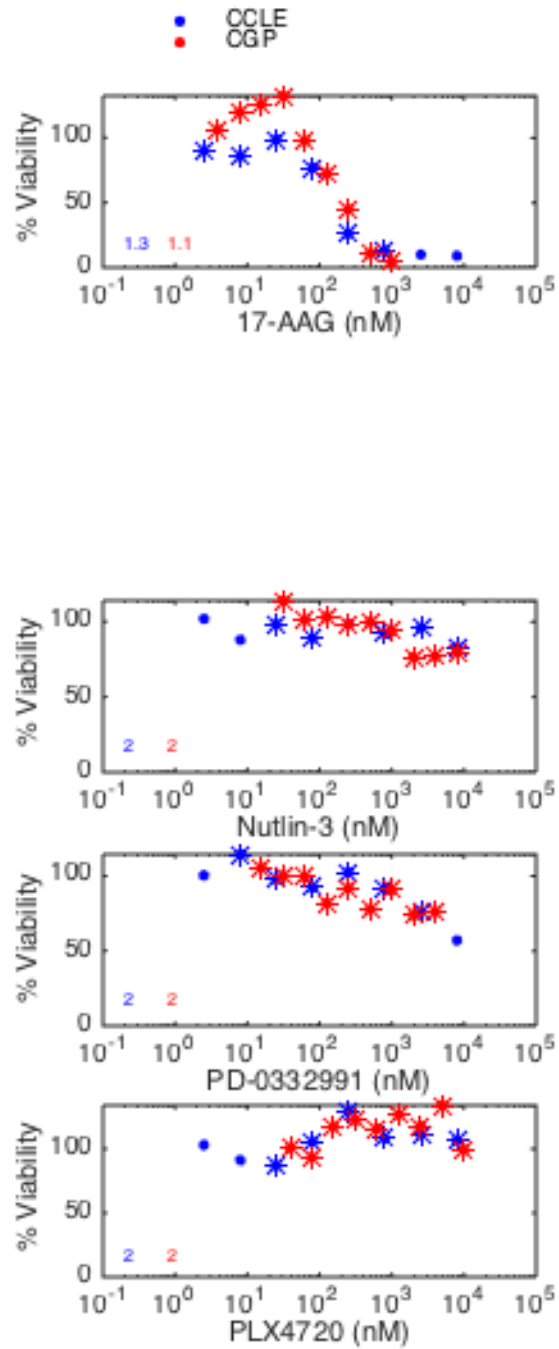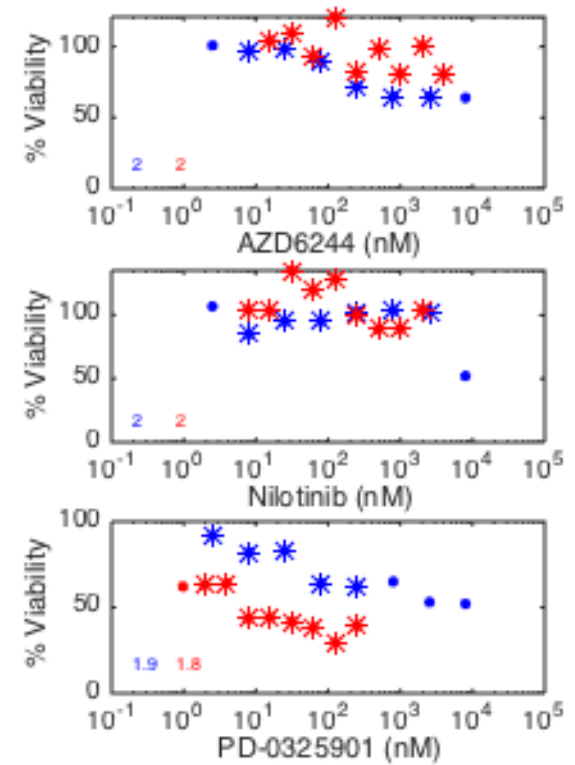

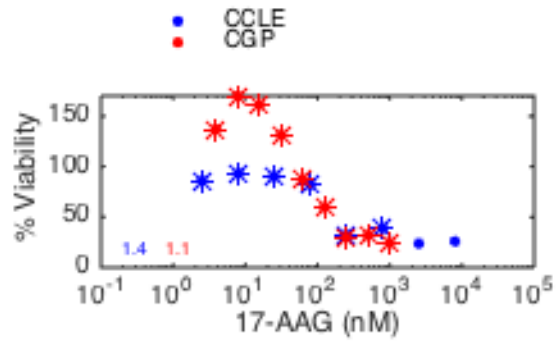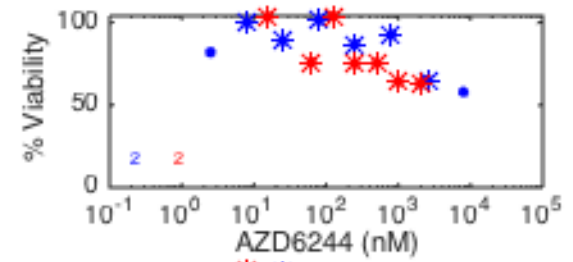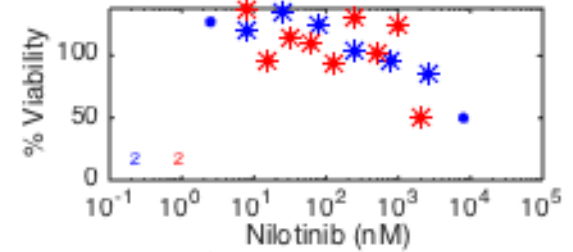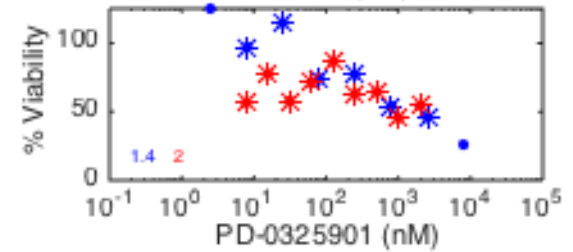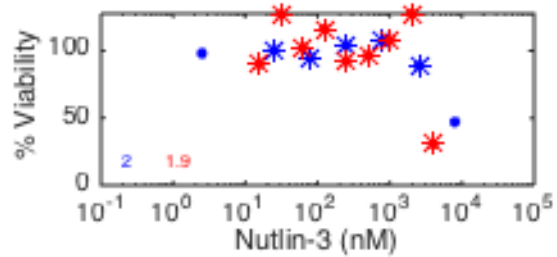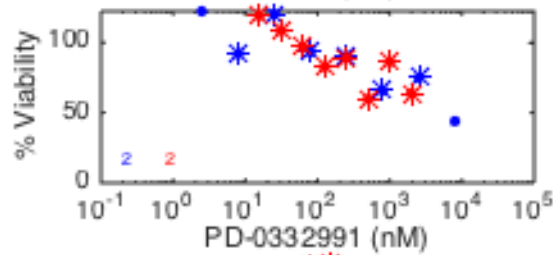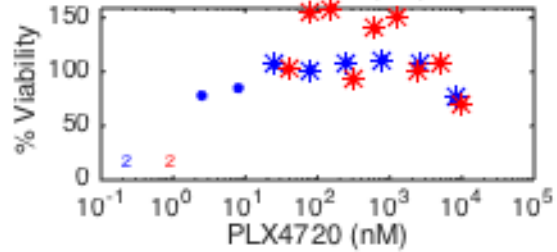



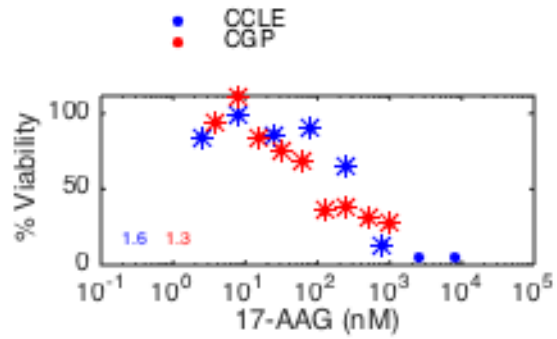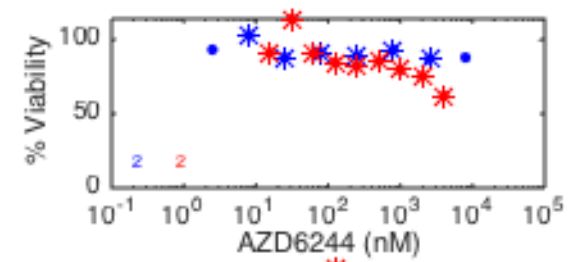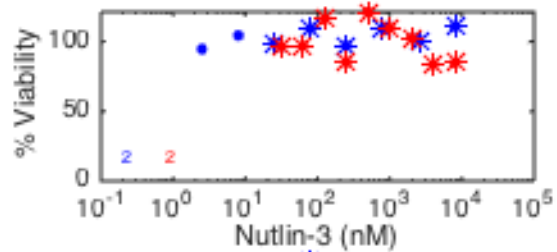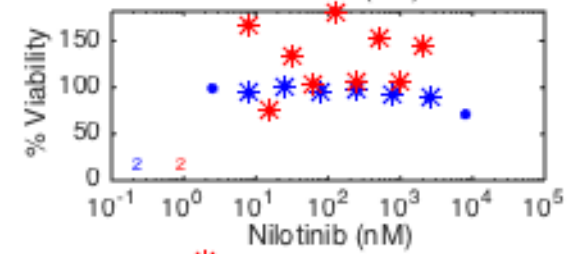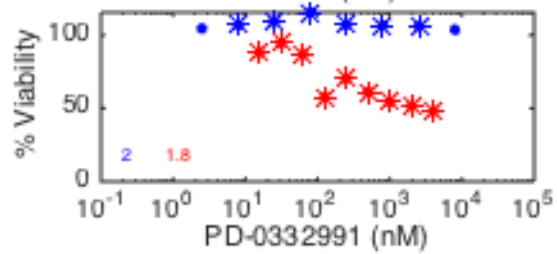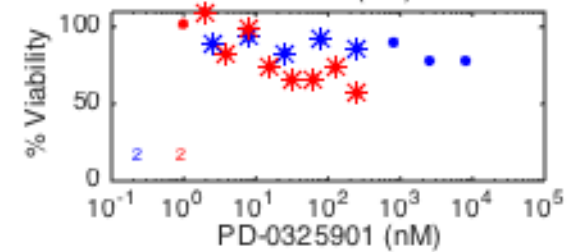

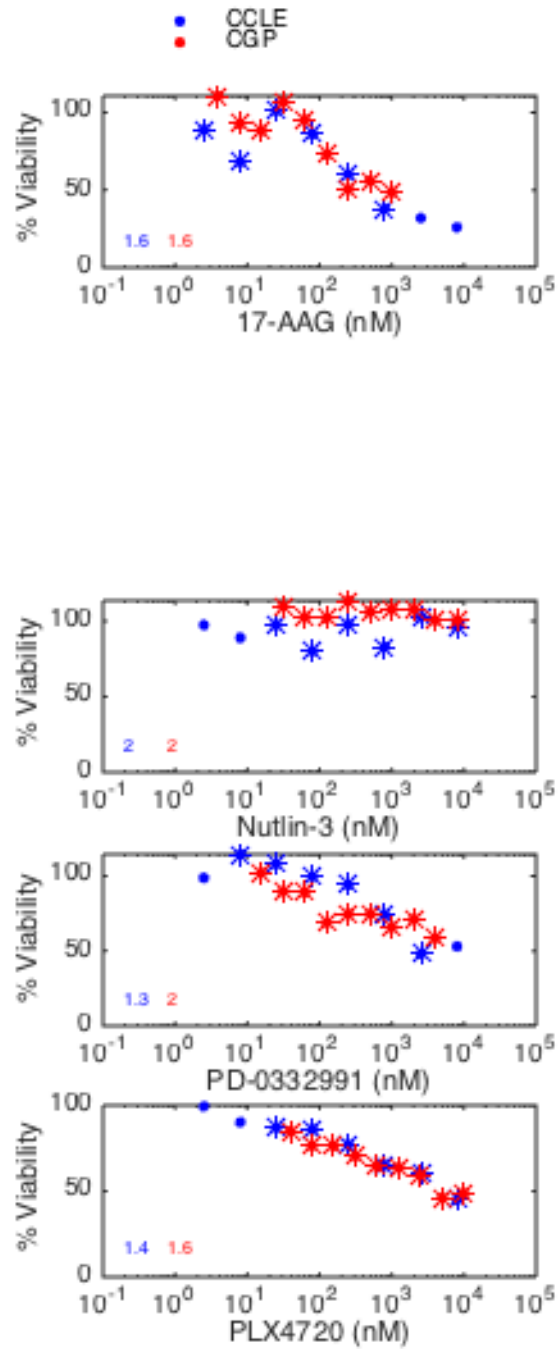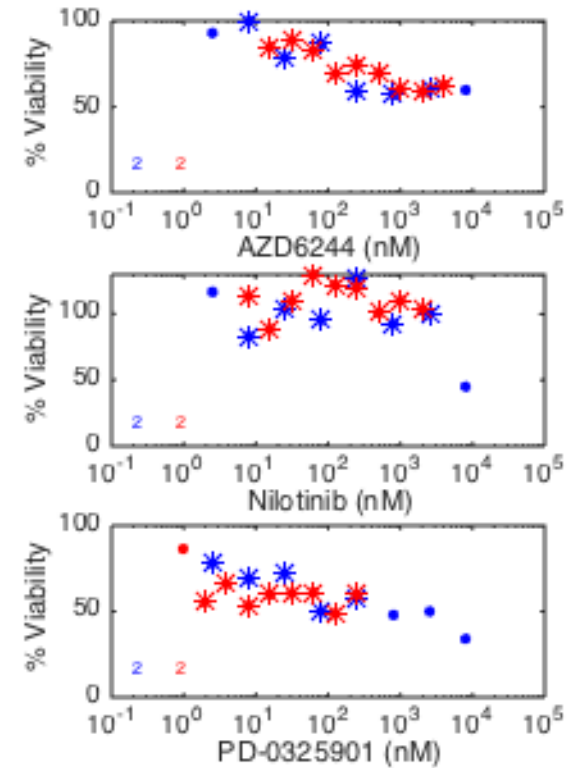

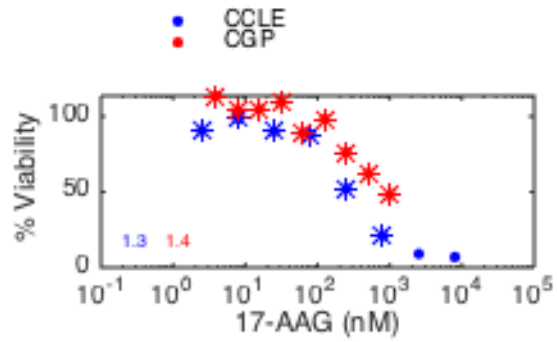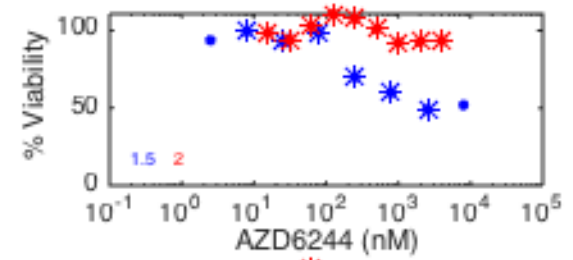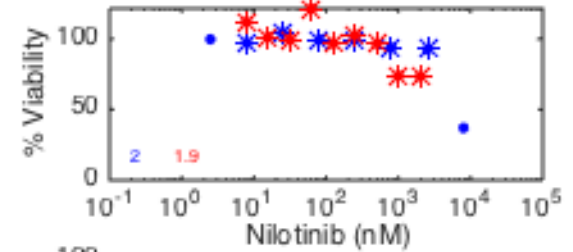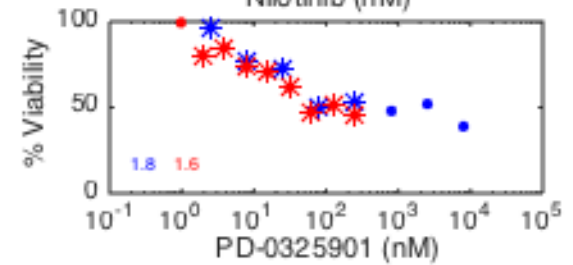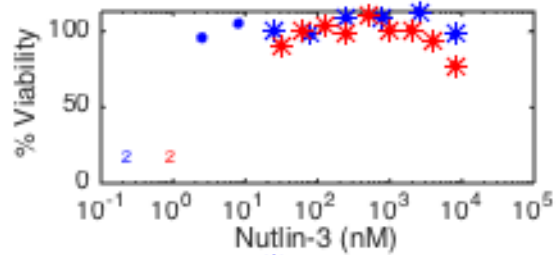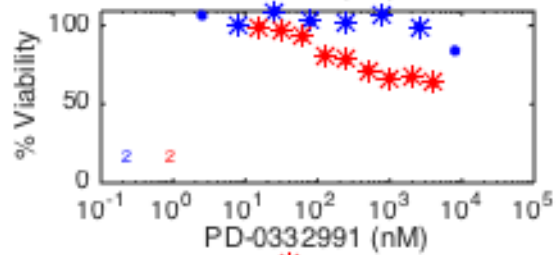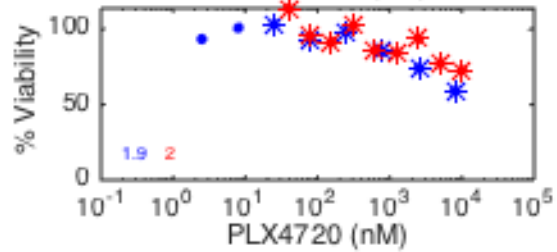

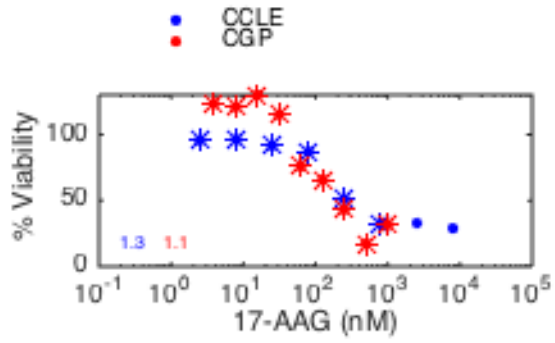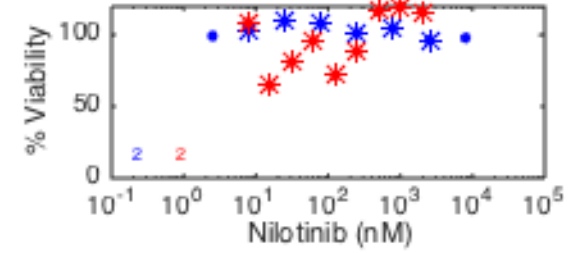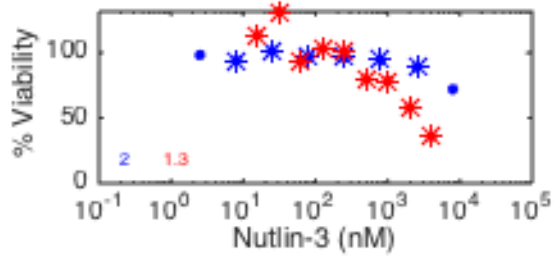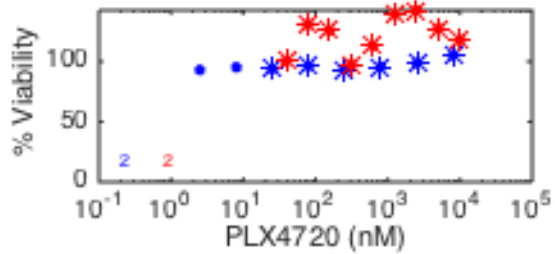

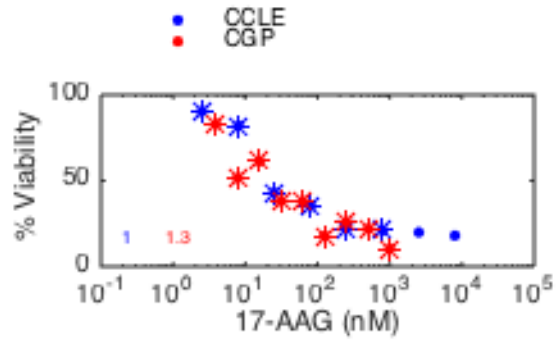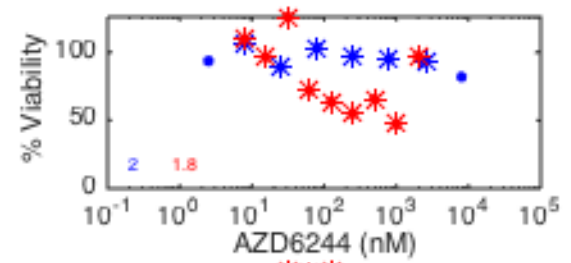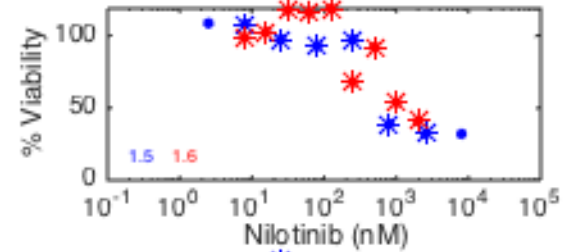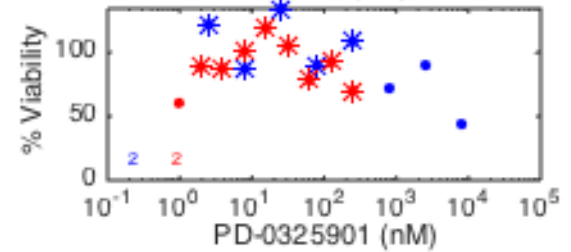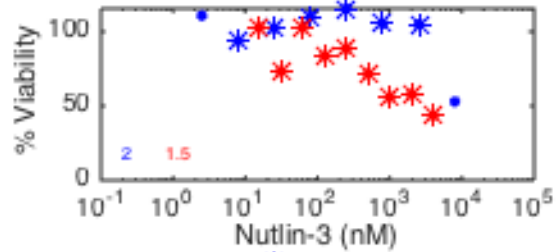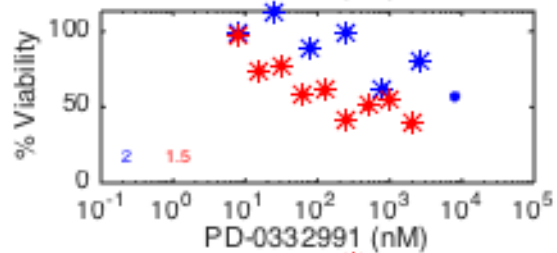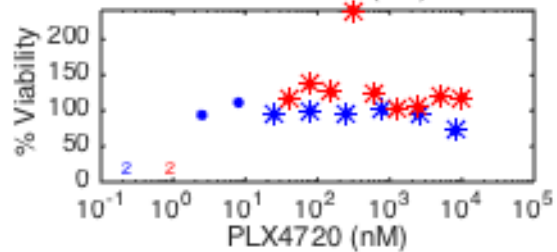

# A253

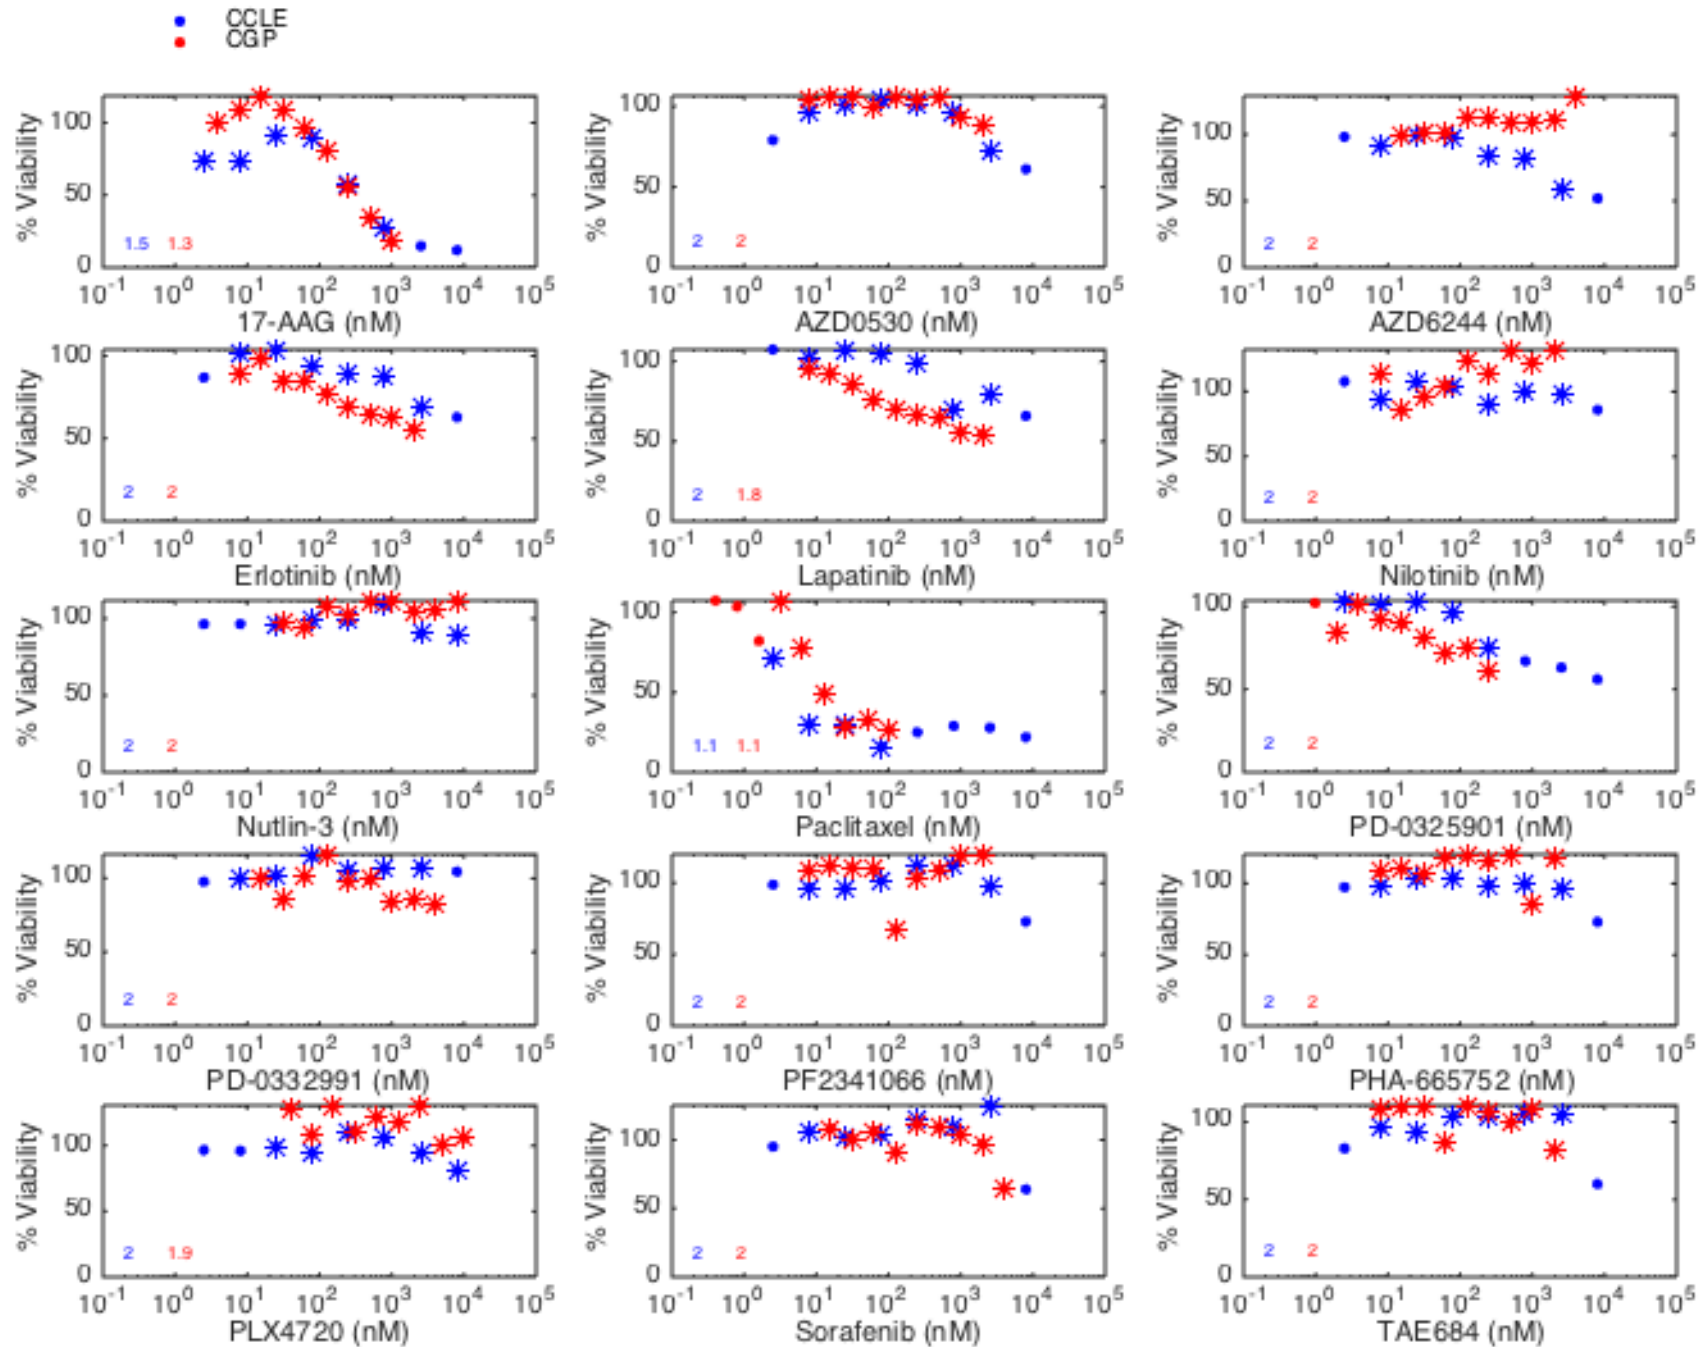

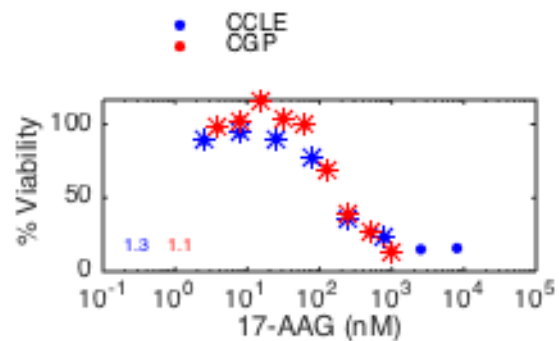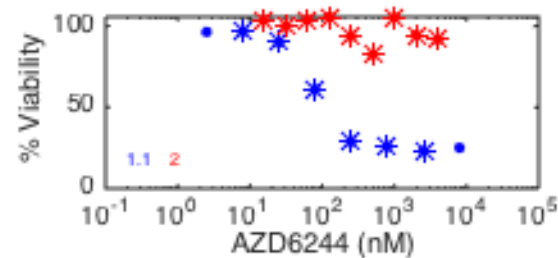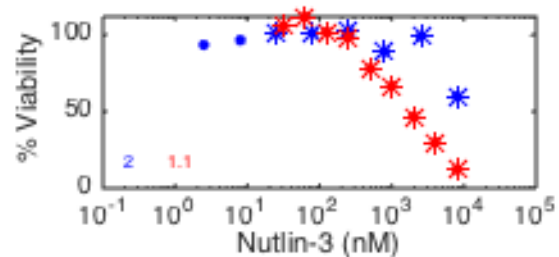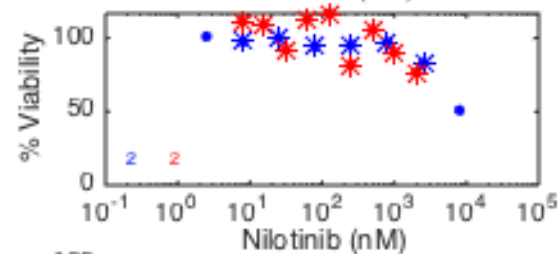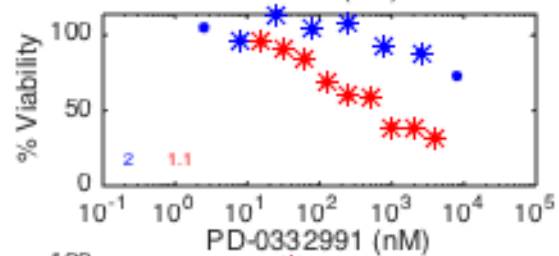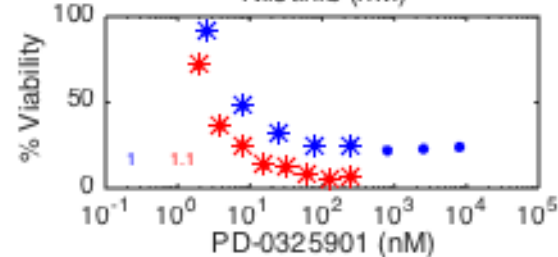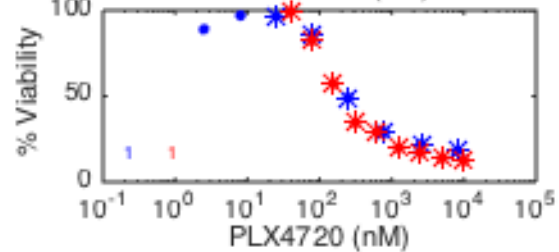

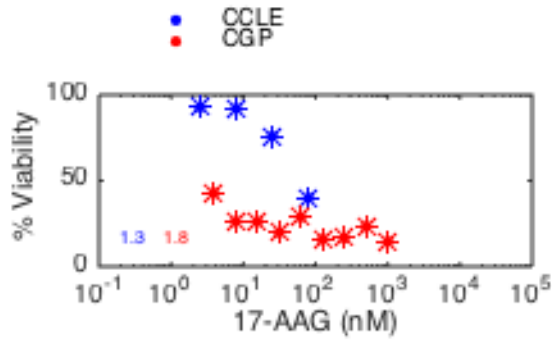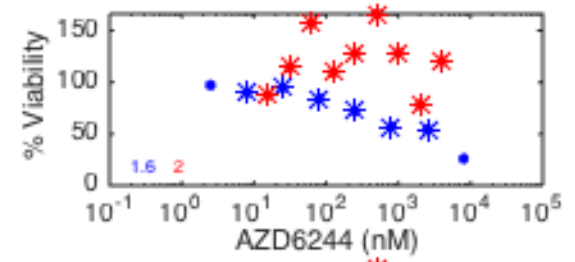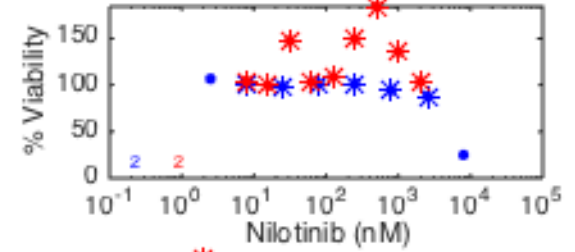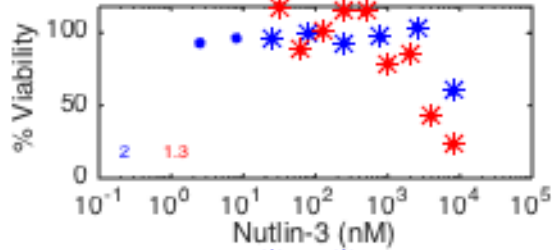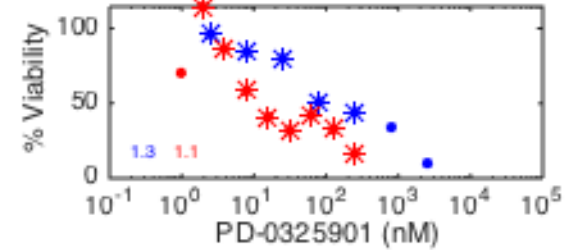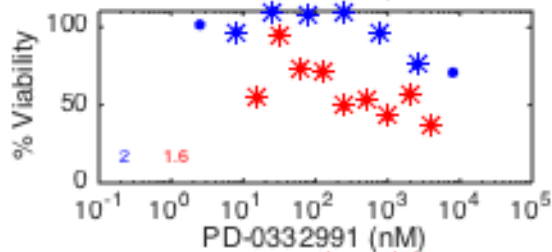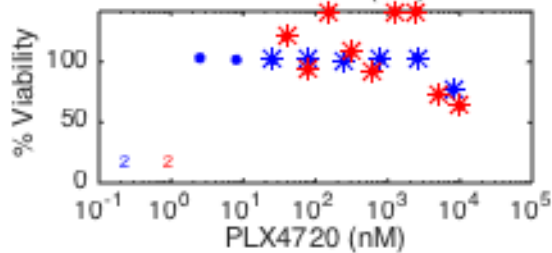



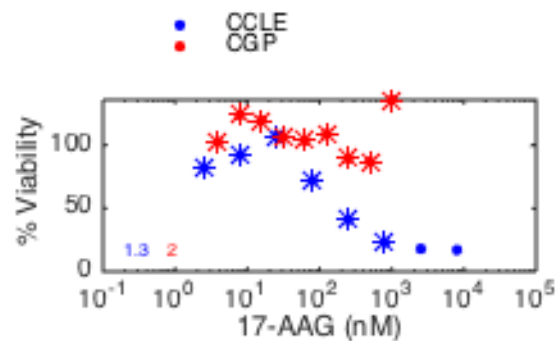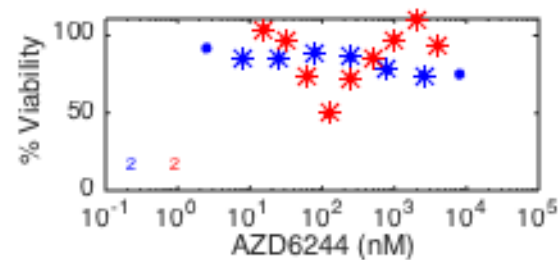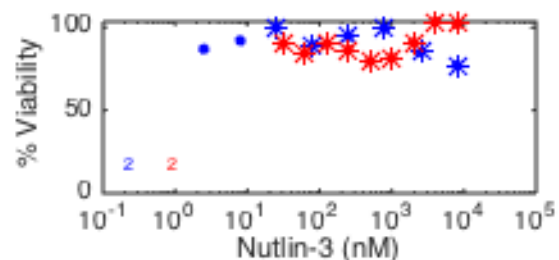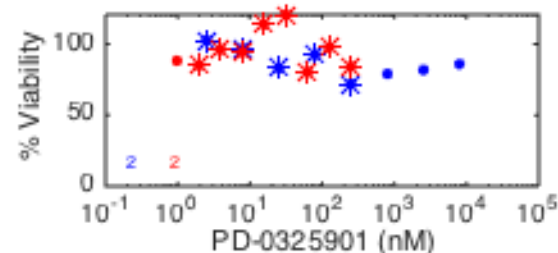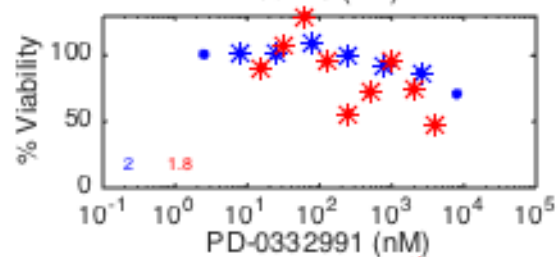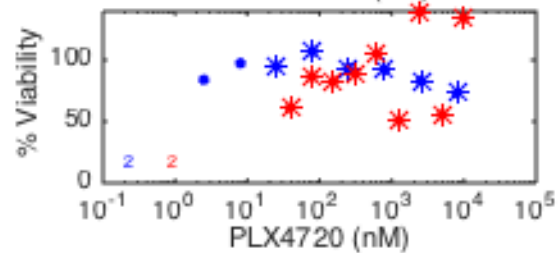

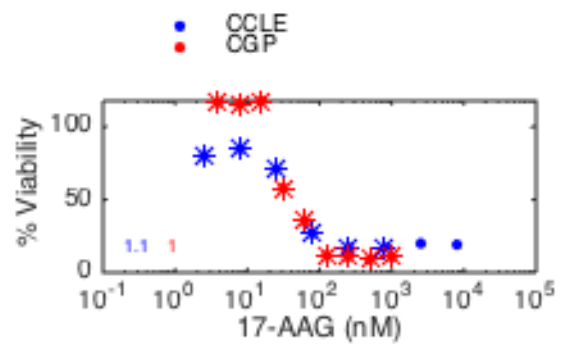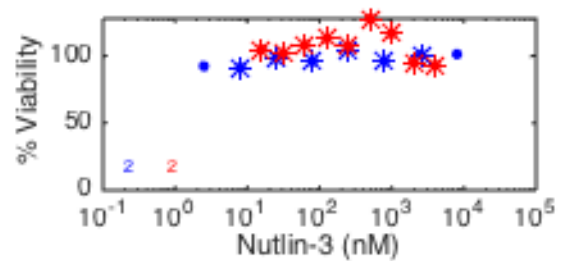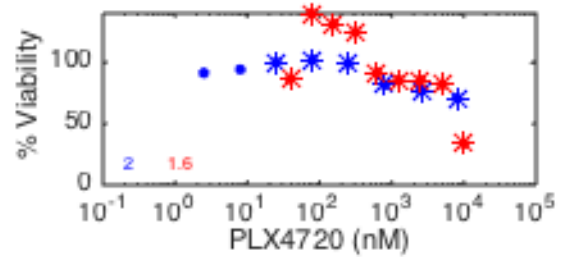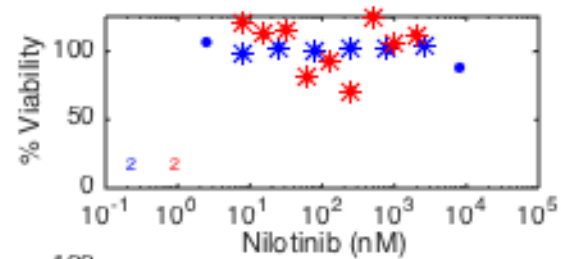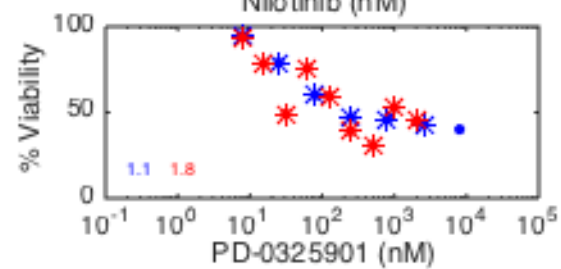

A2780

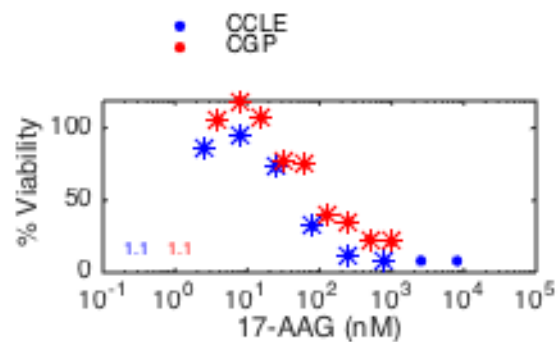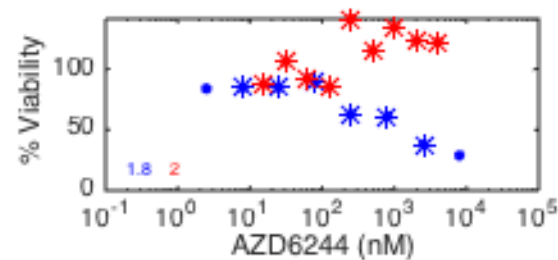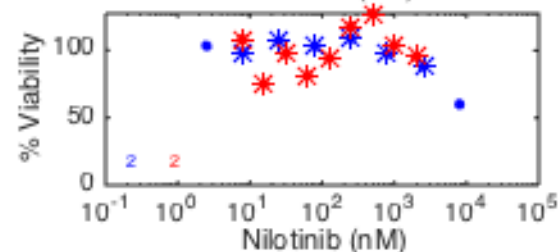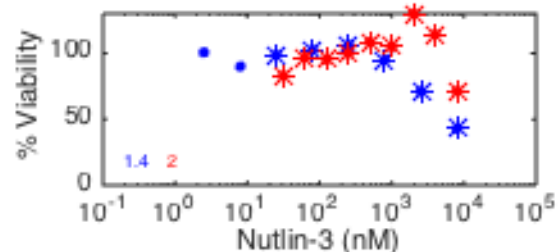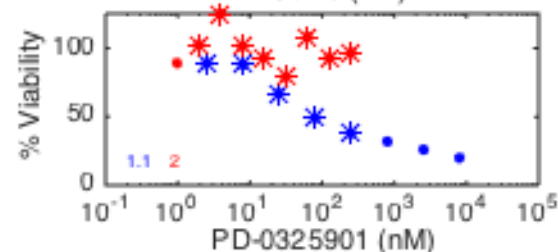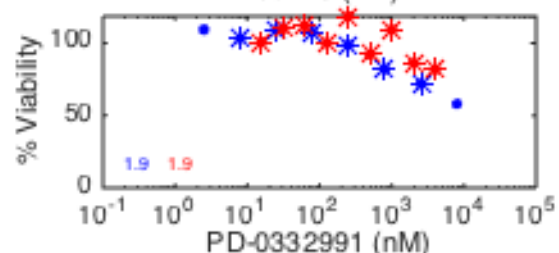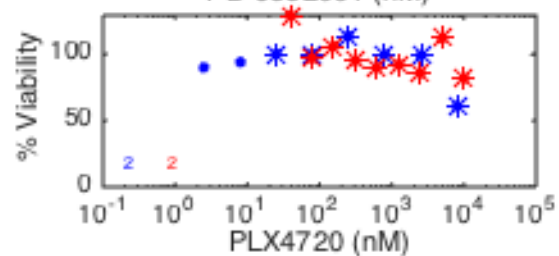

# ACHN

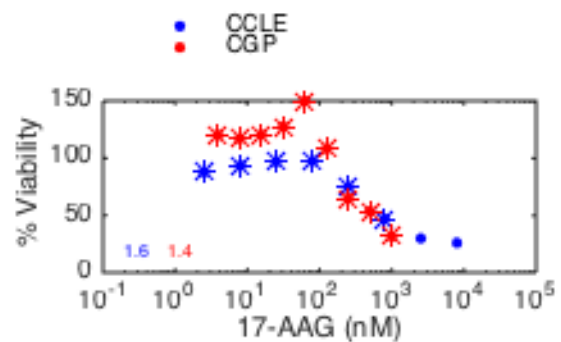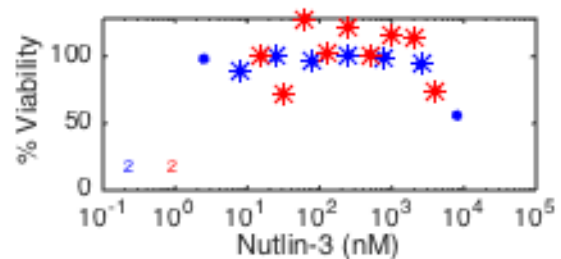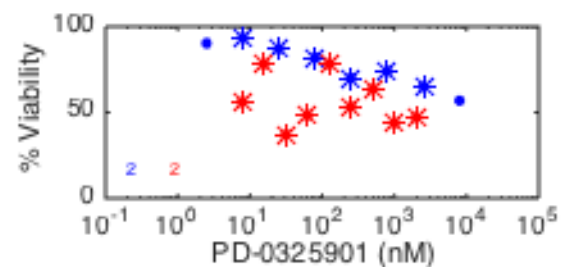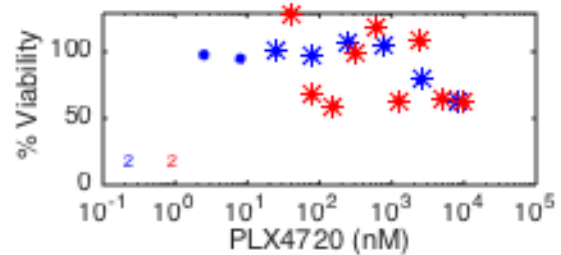

# AN3-CA

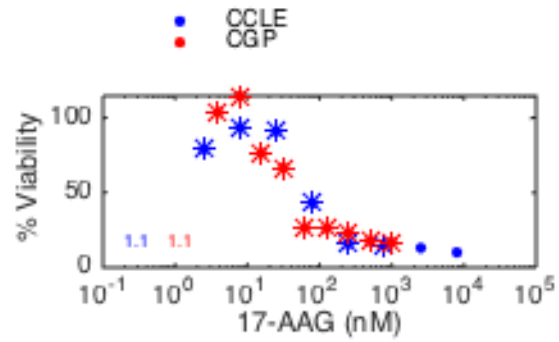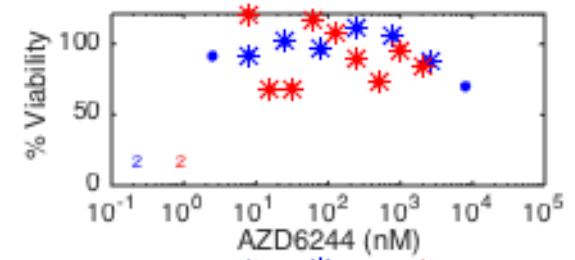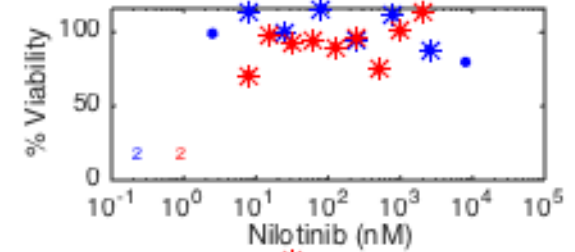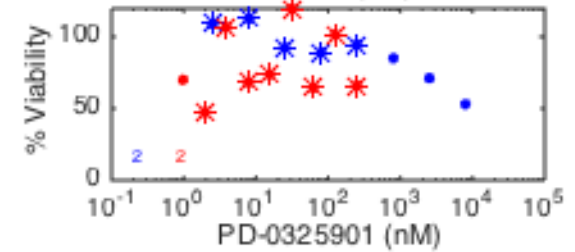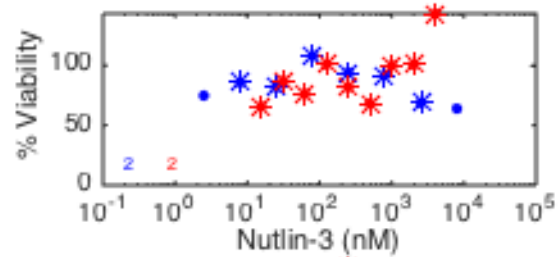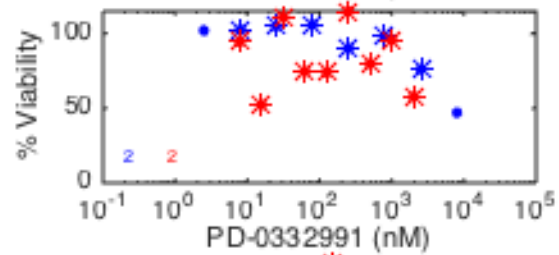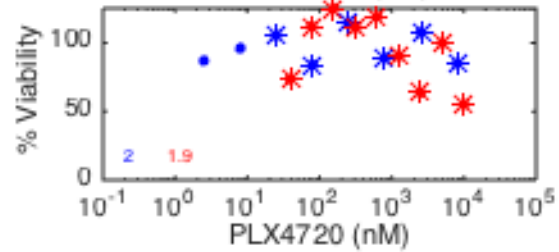

# AsPC-1

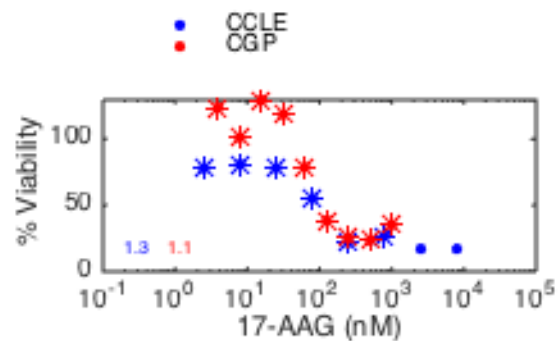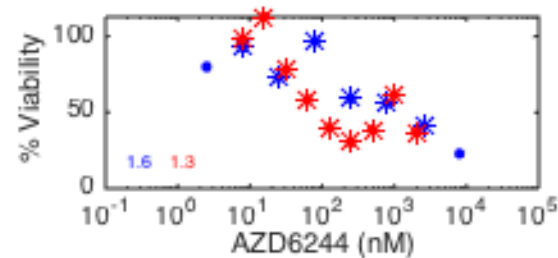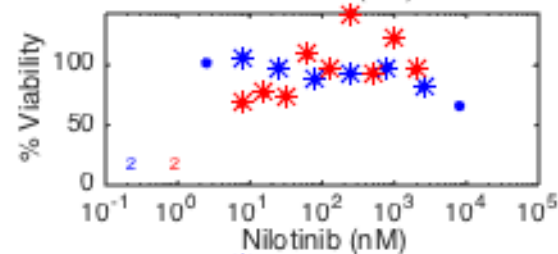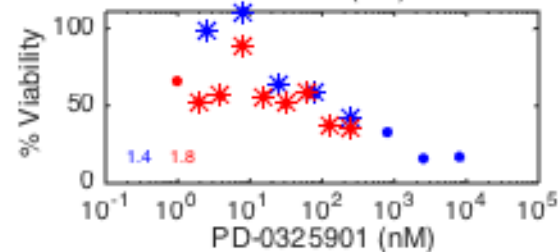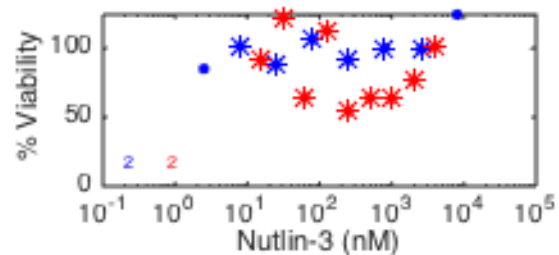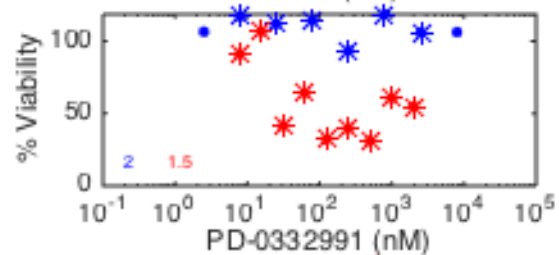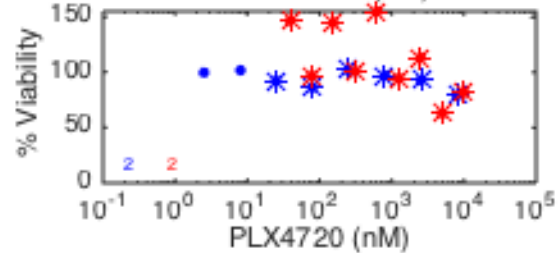

# AU565

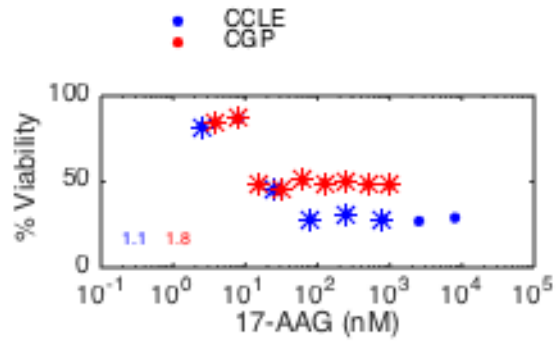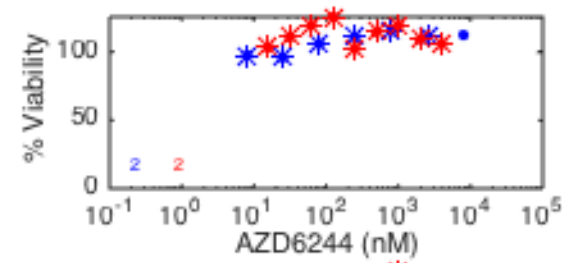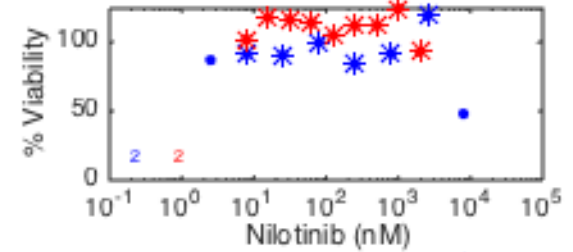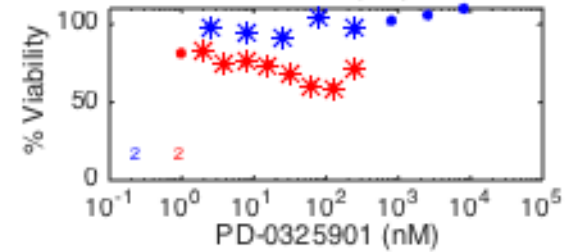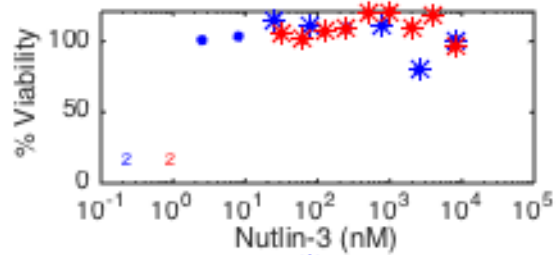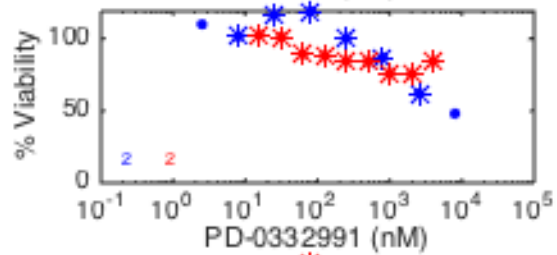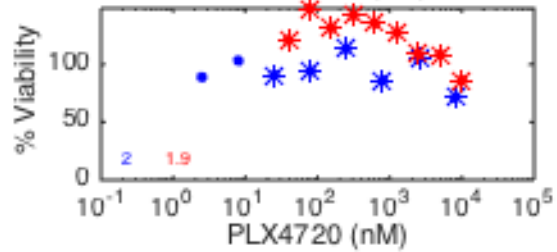

# BCPAP

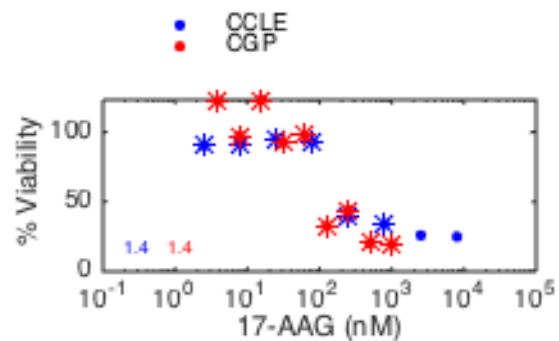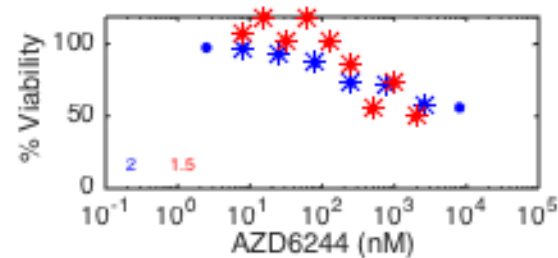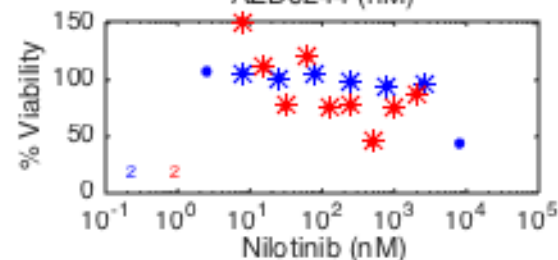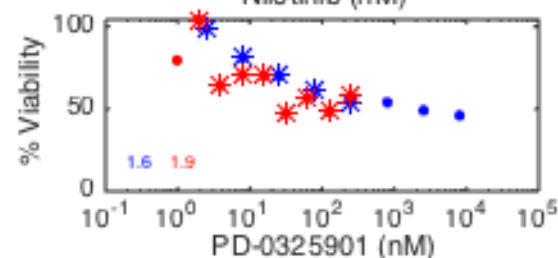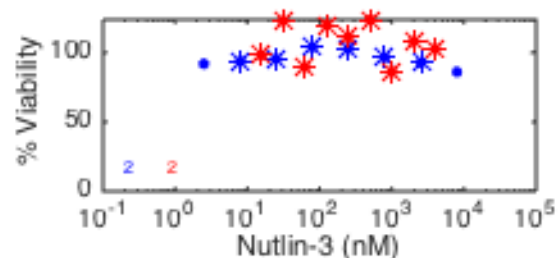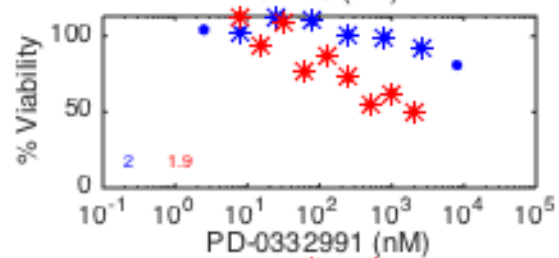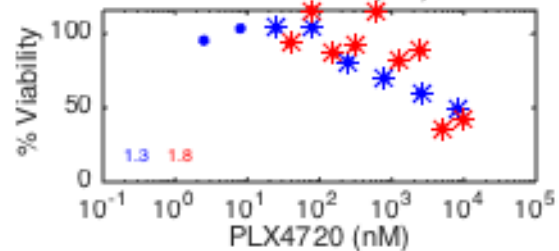



BFTC-909

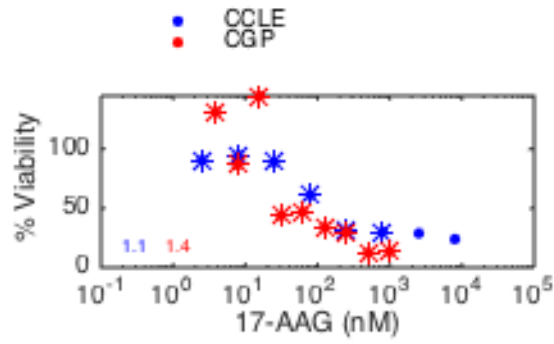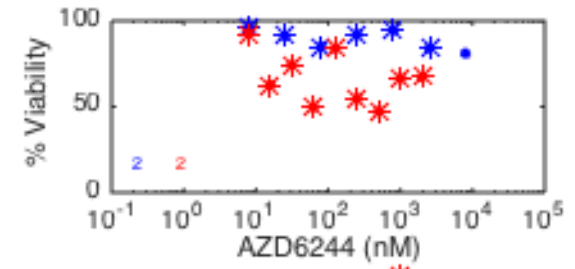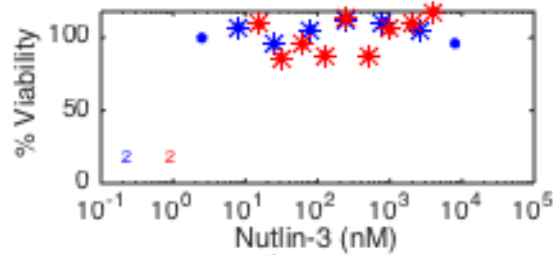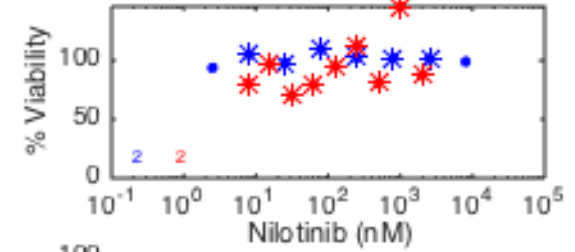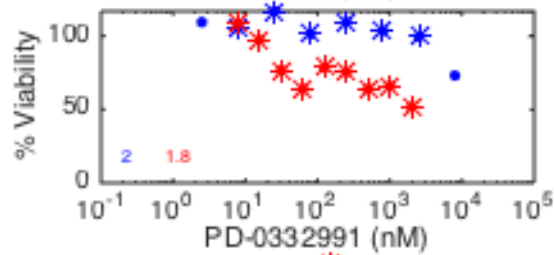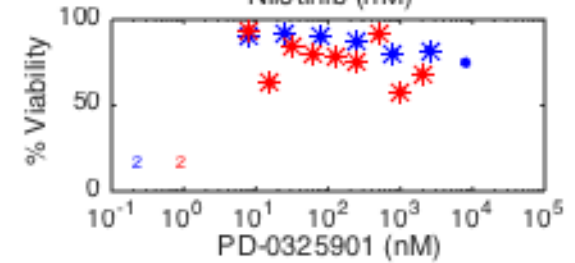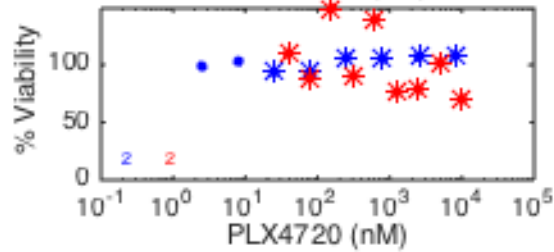

# BL-41

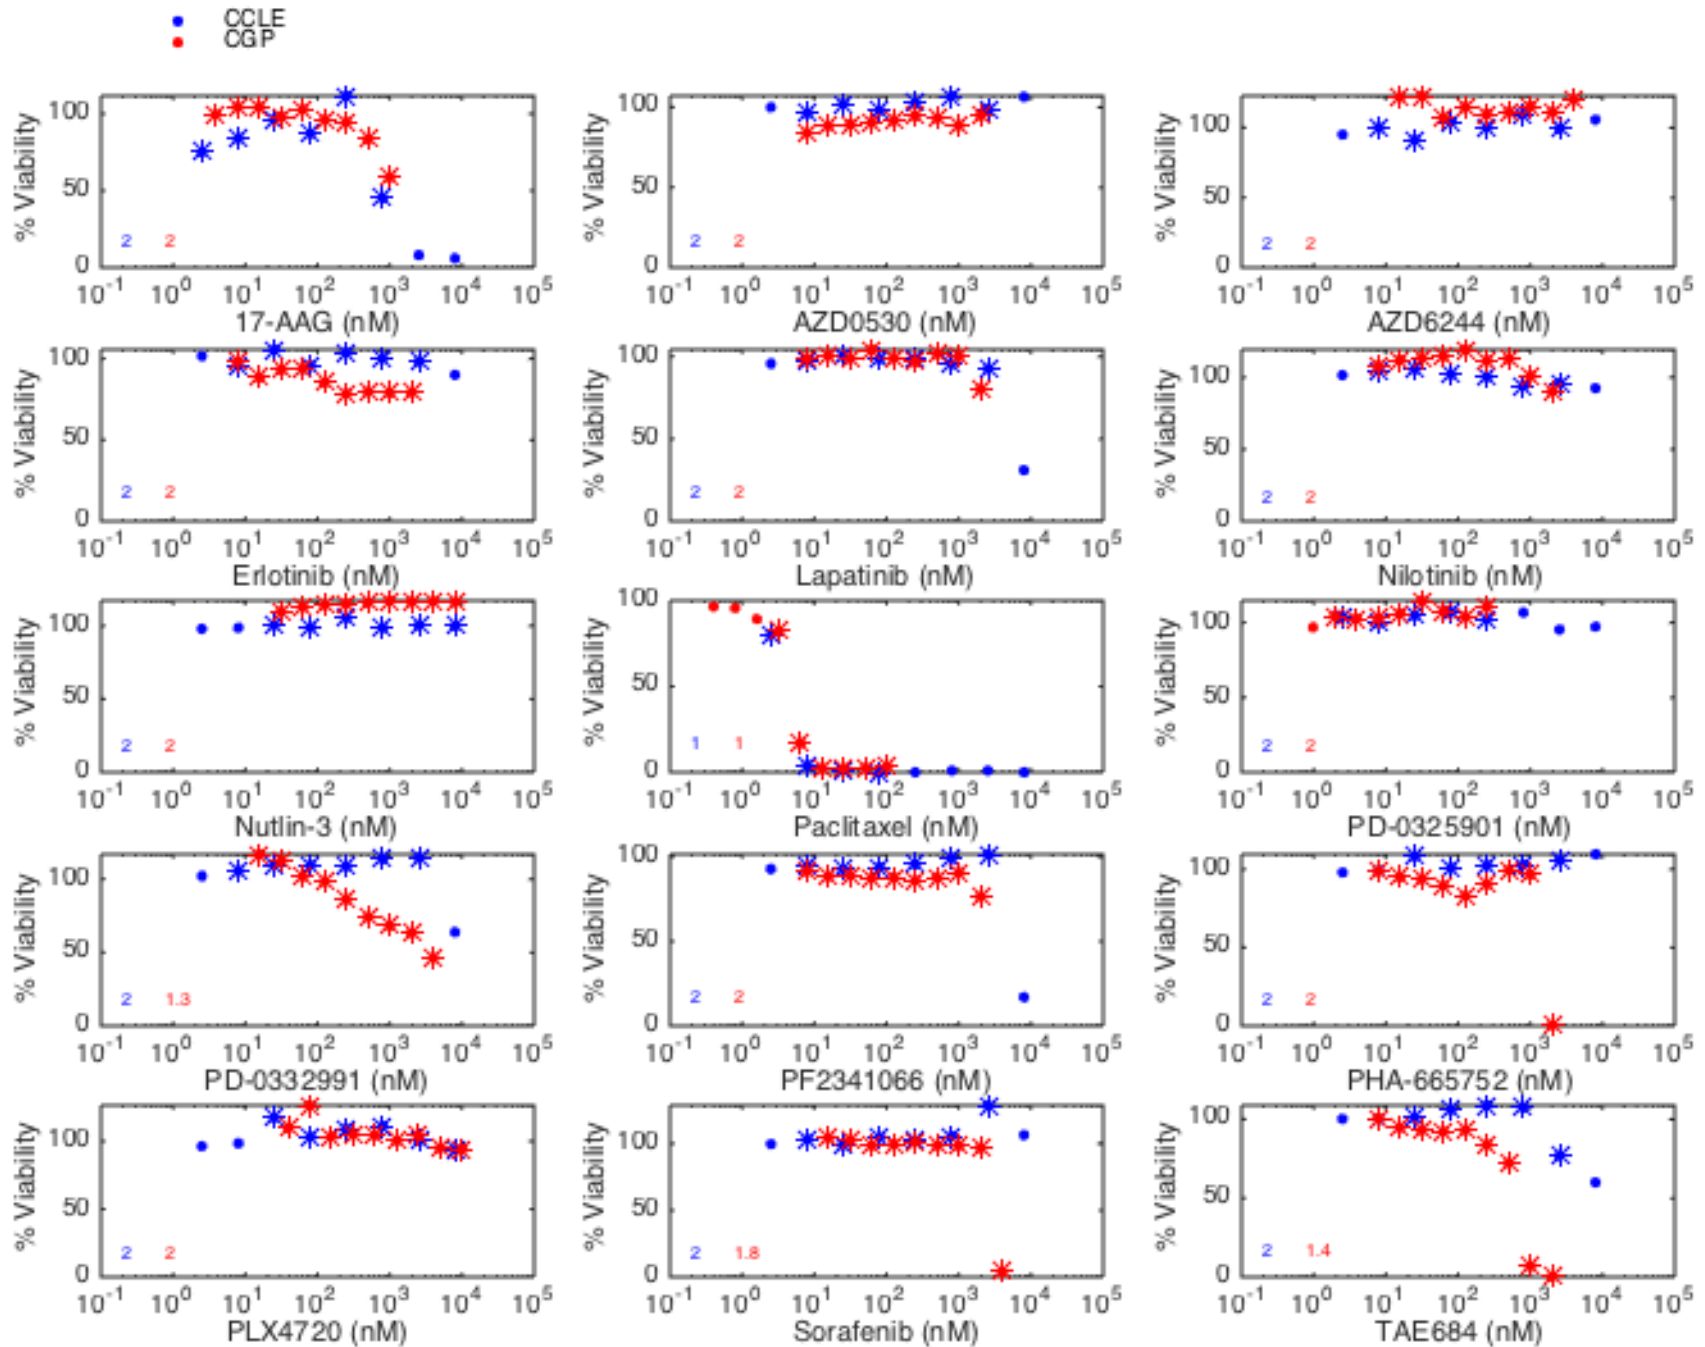

# BL-70

● CCLE  
● CGP

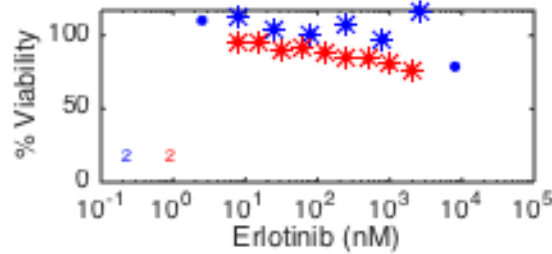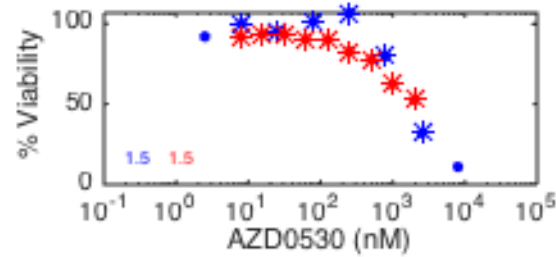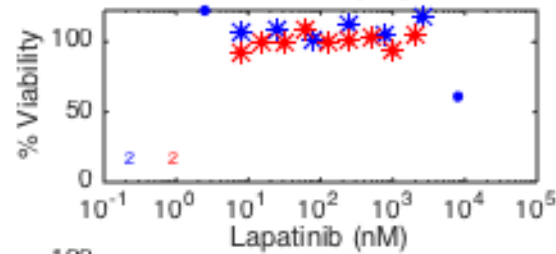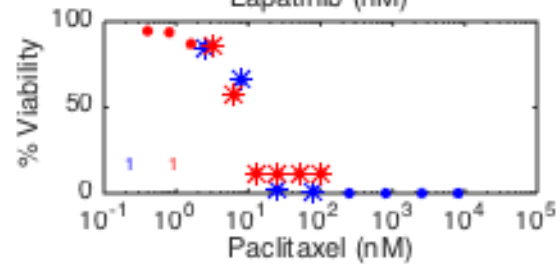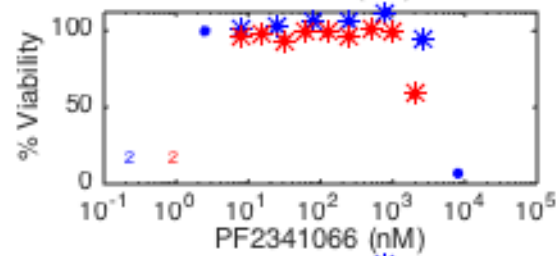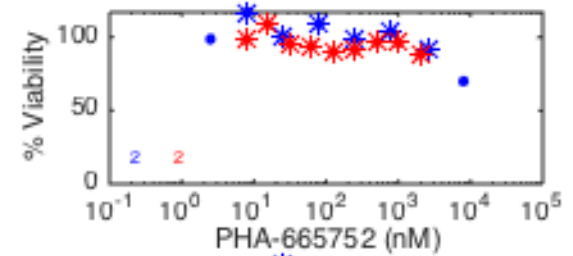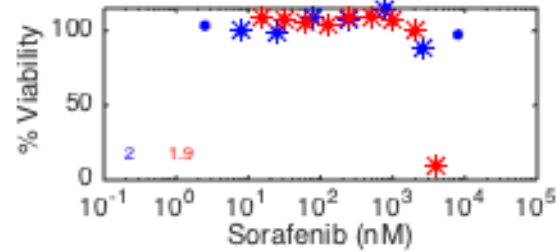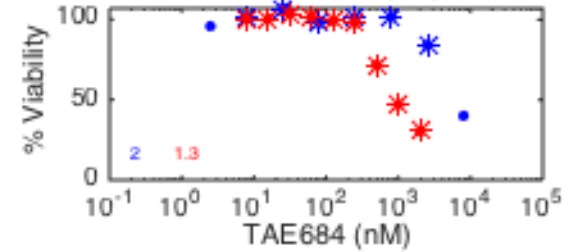

BT-20

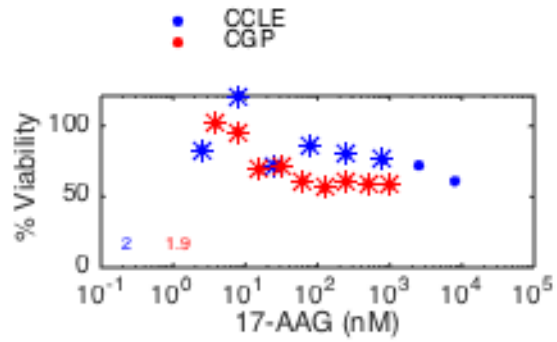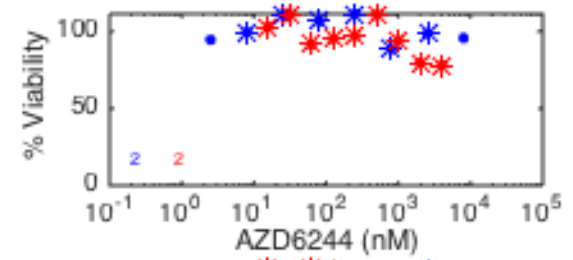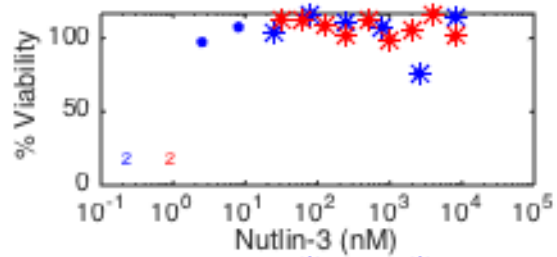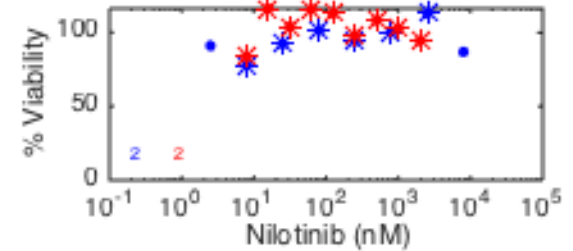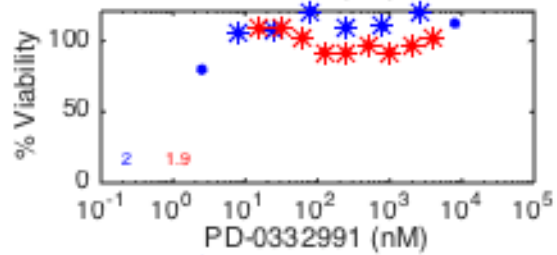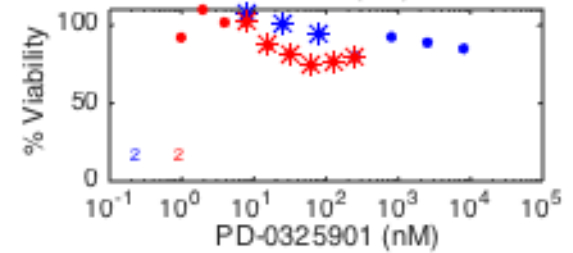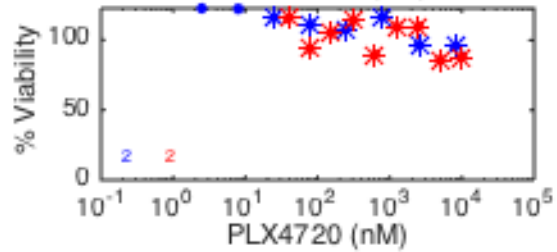

# BT-474

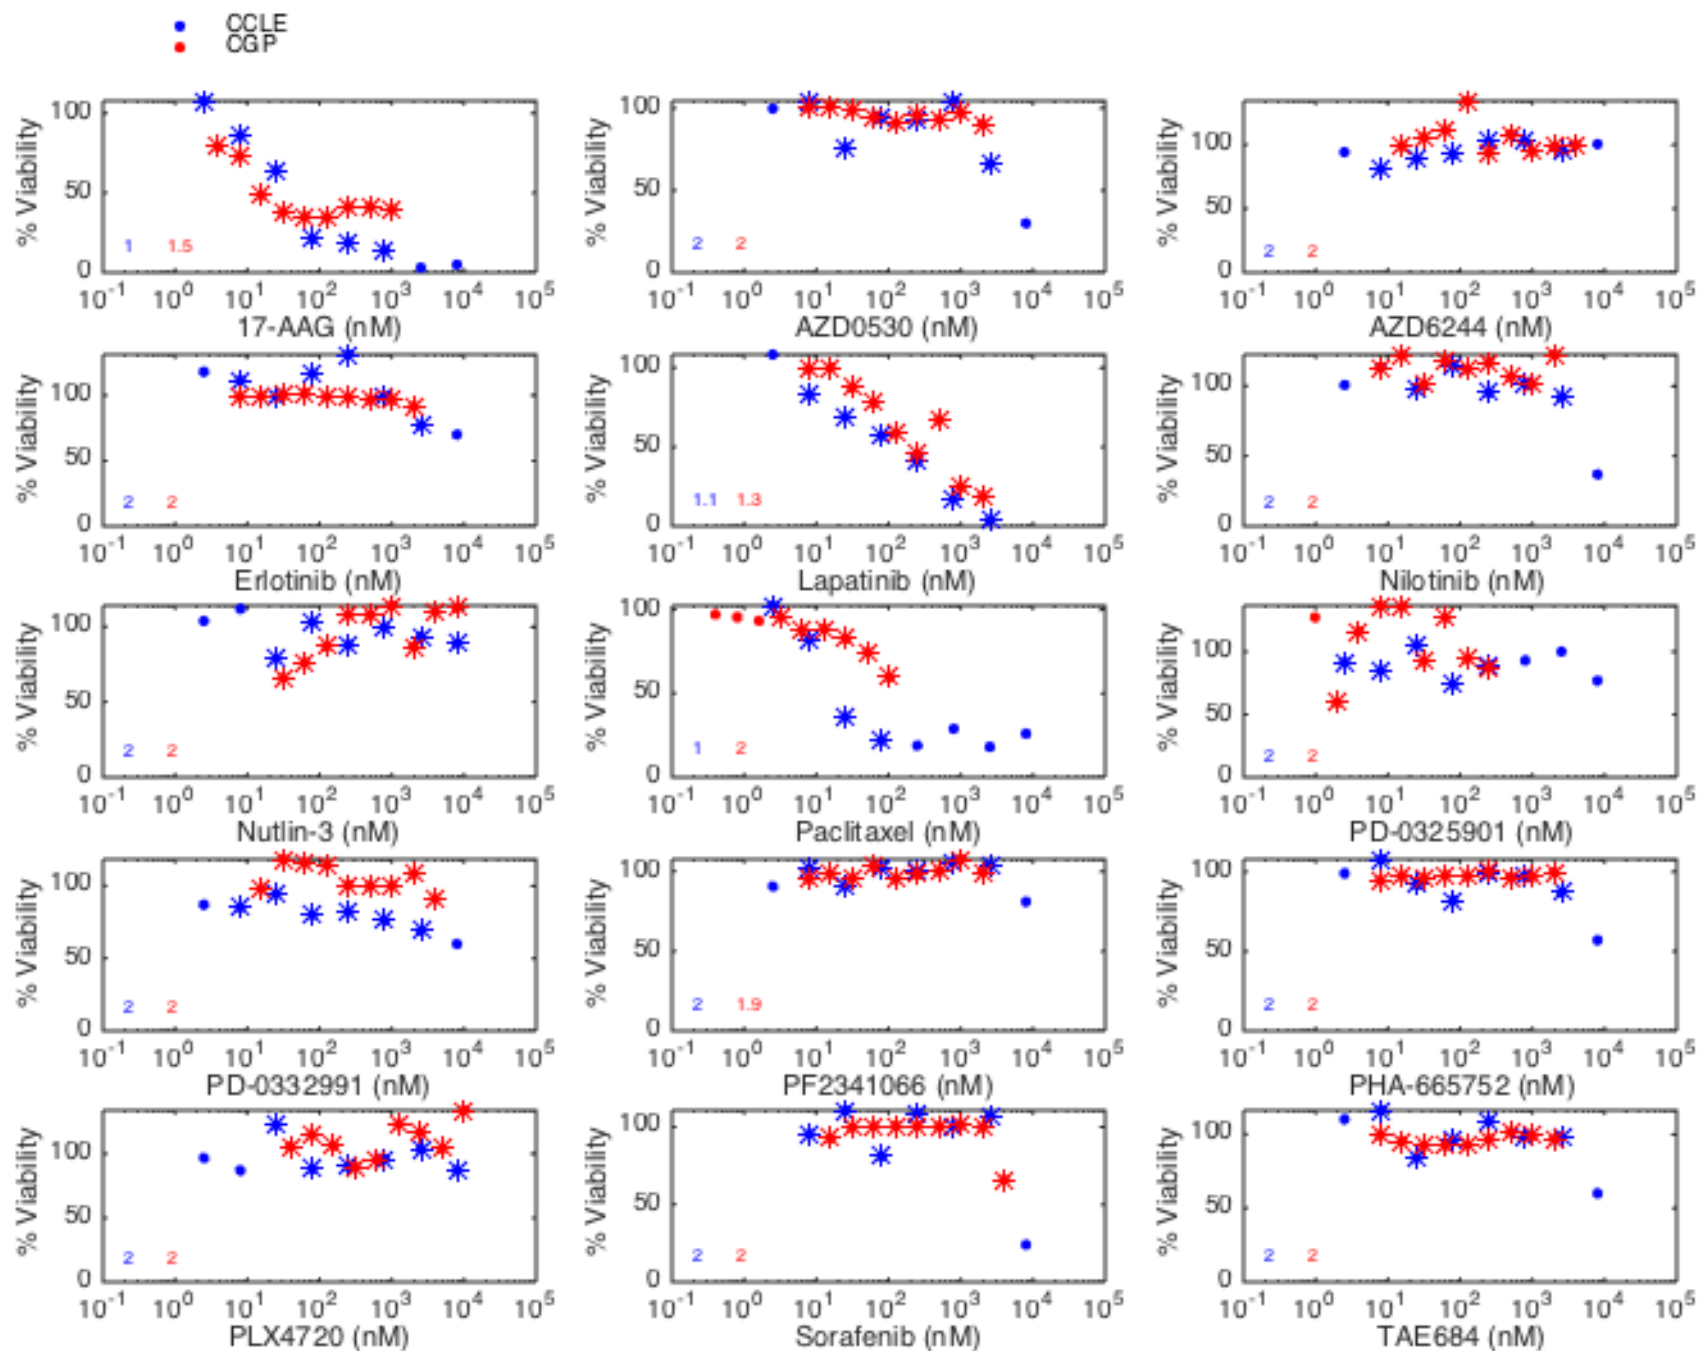

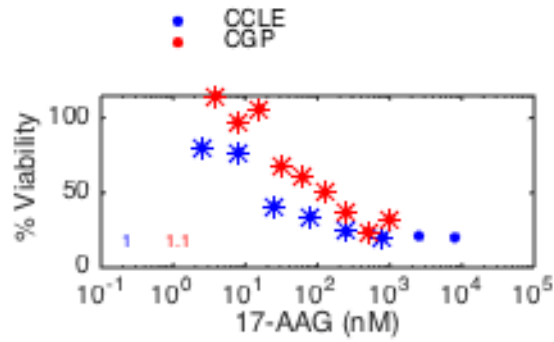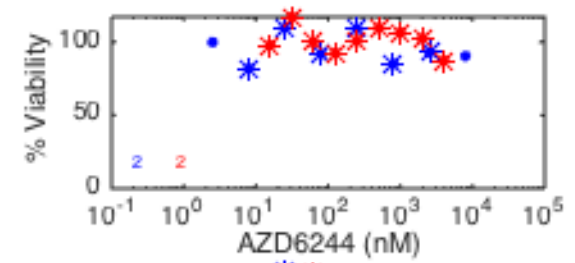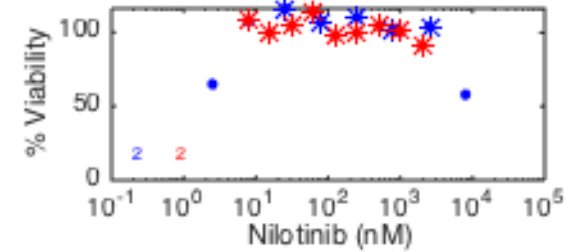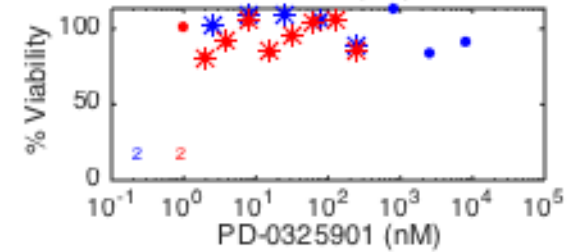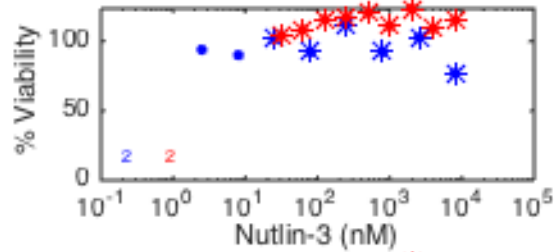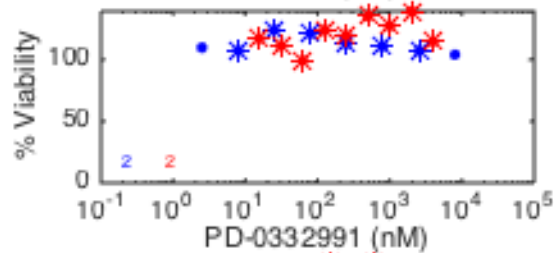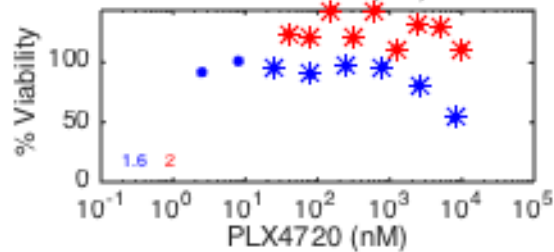

# BxPC-3

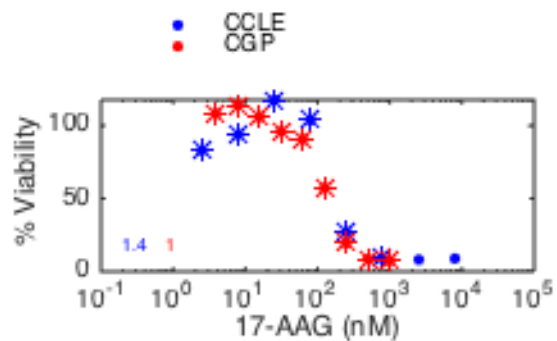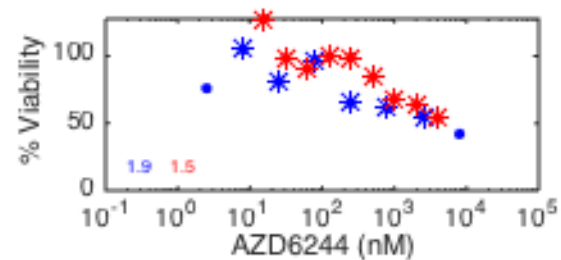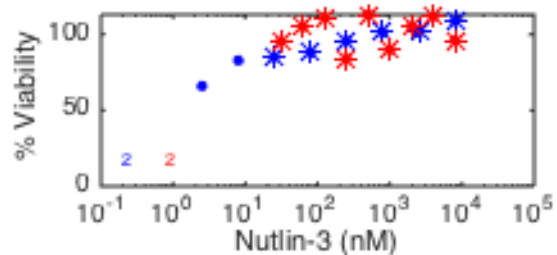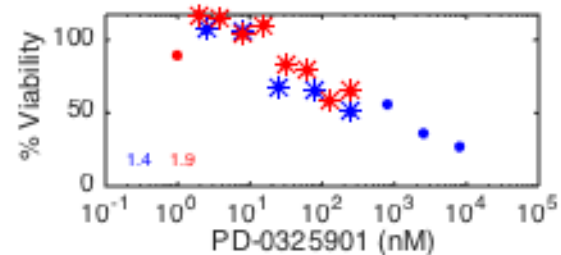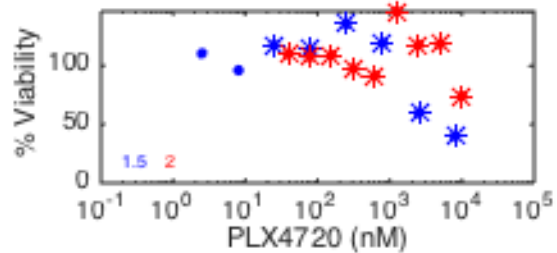

# C2BBe1

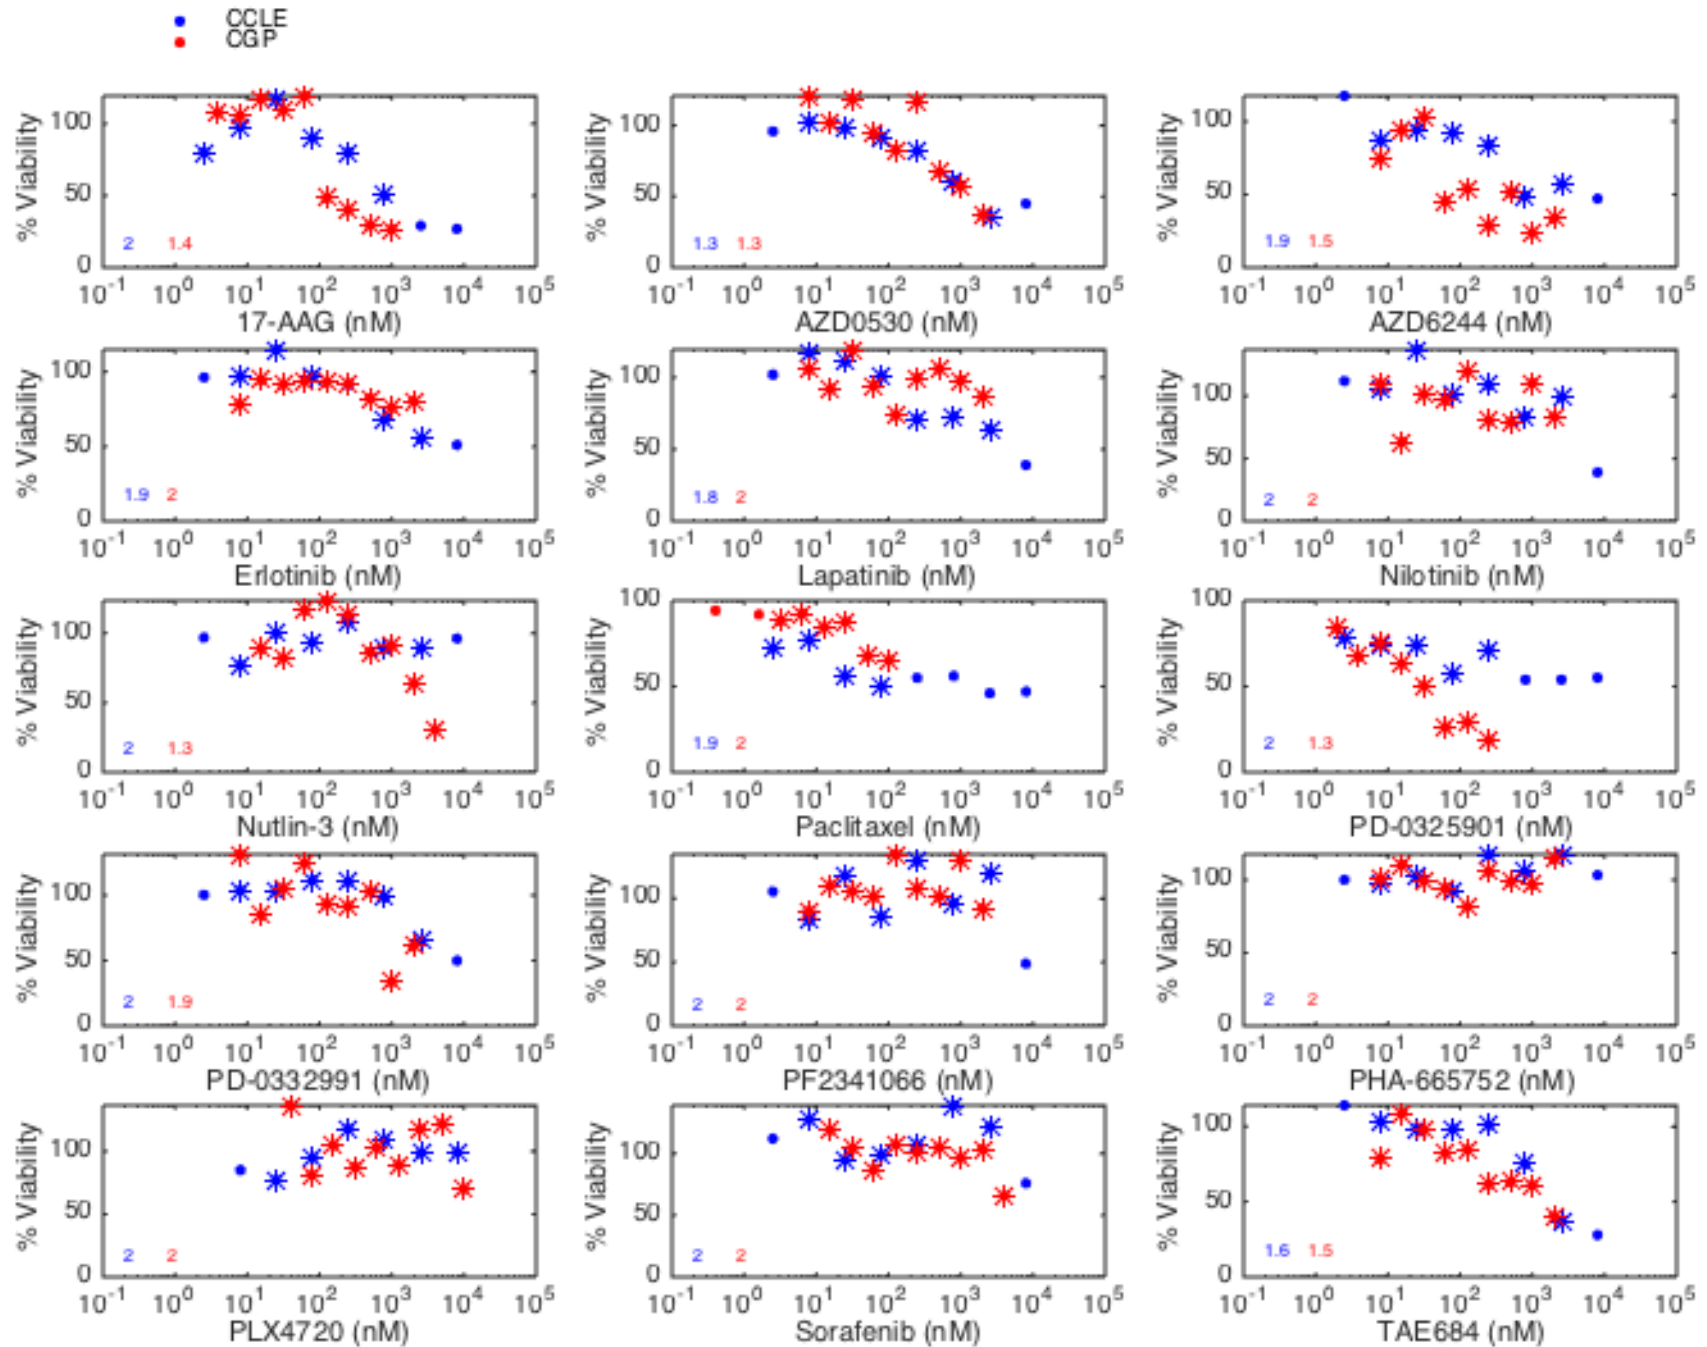



C3A

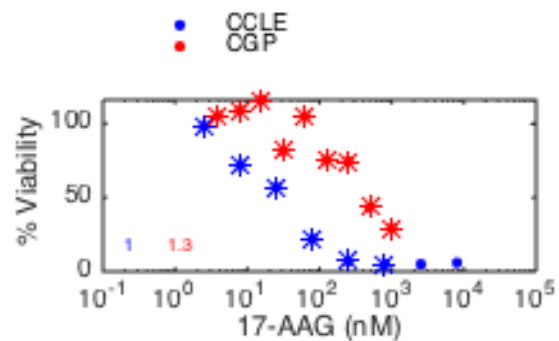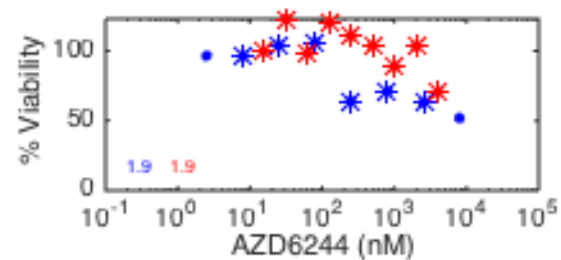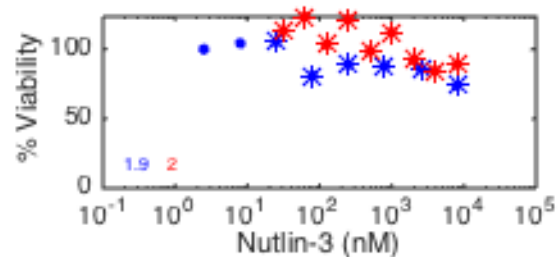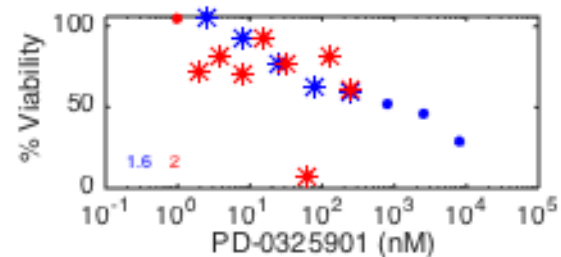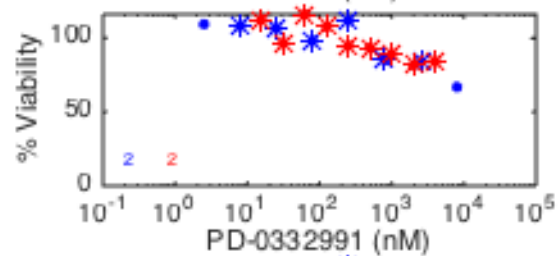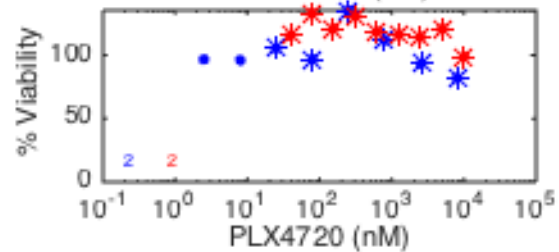

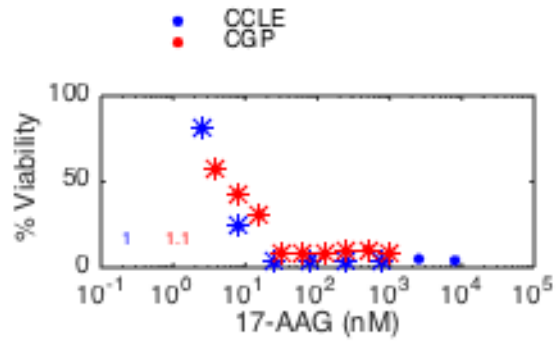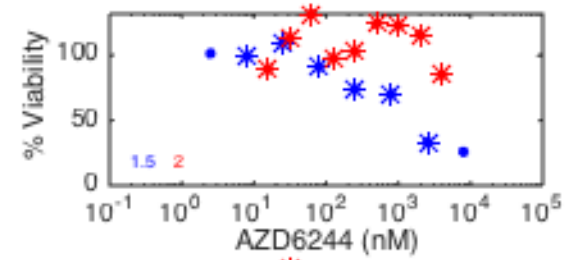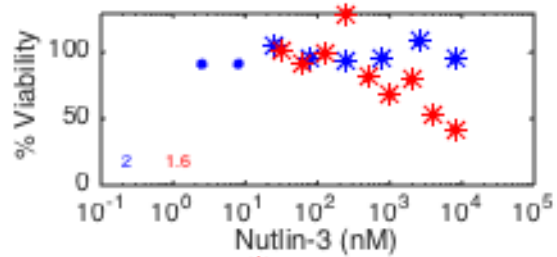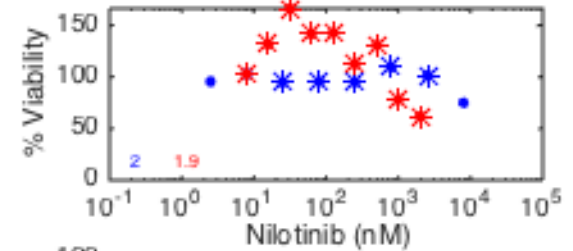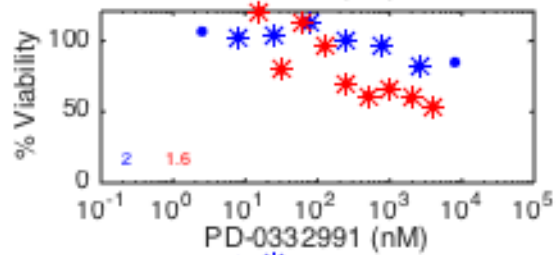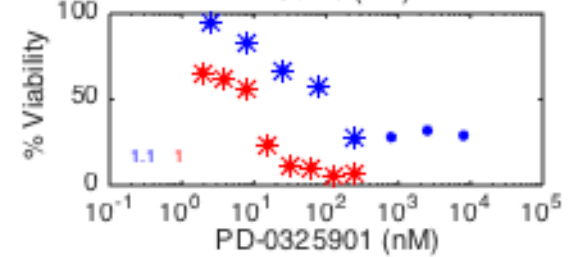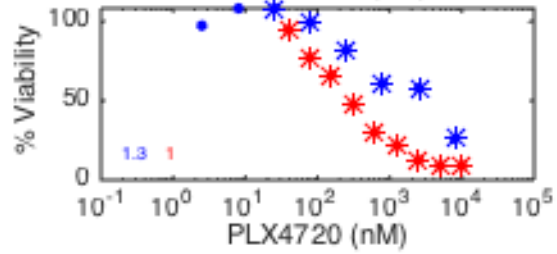

# CAL-12T

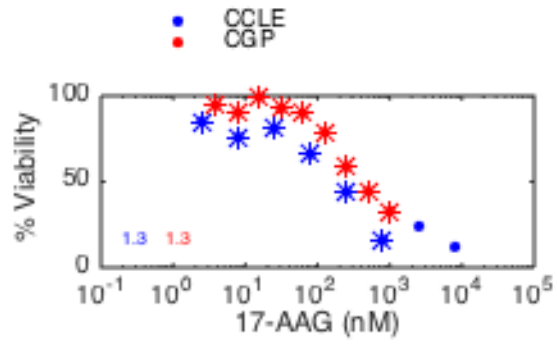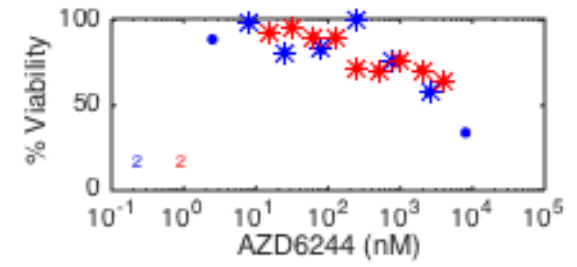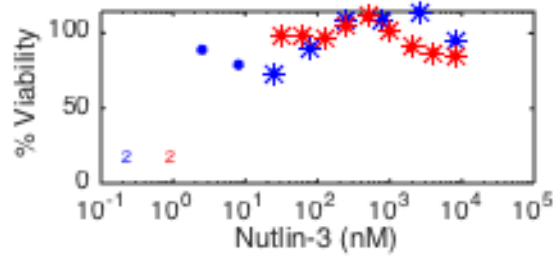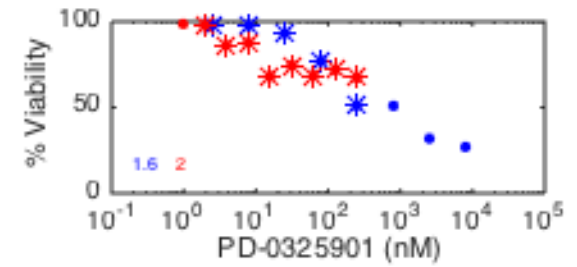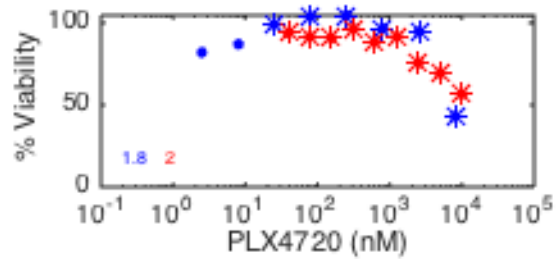

# CAL-27

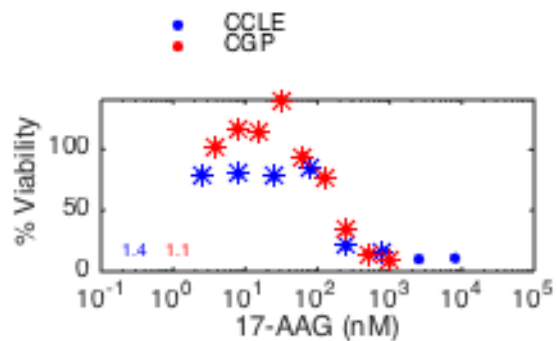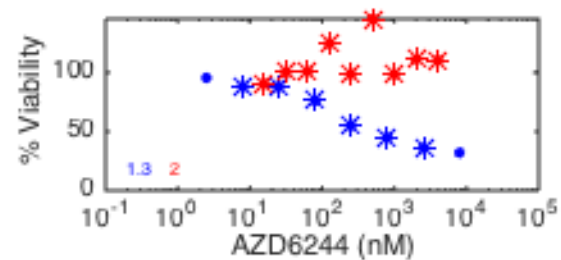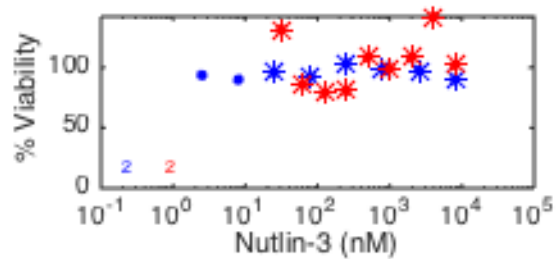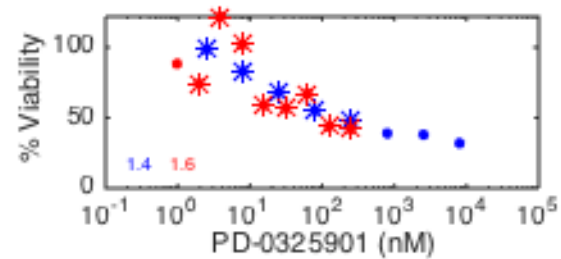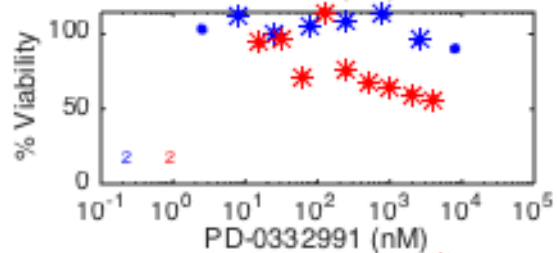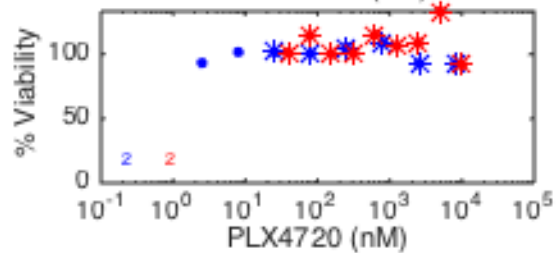

CAL-85-1

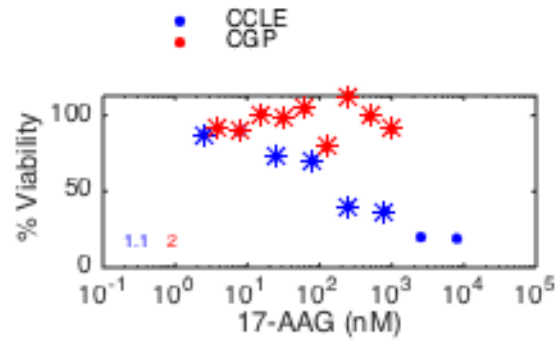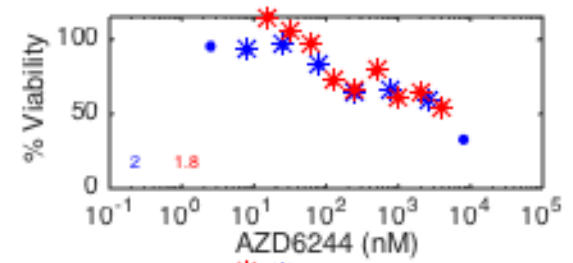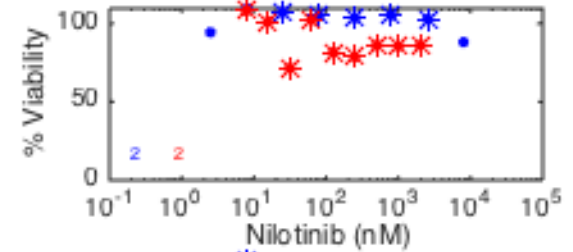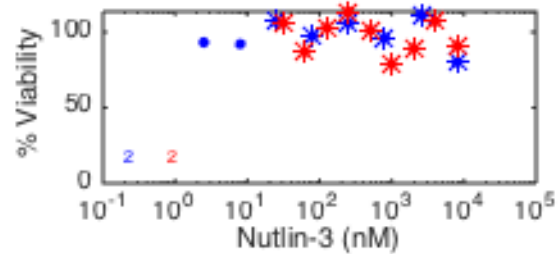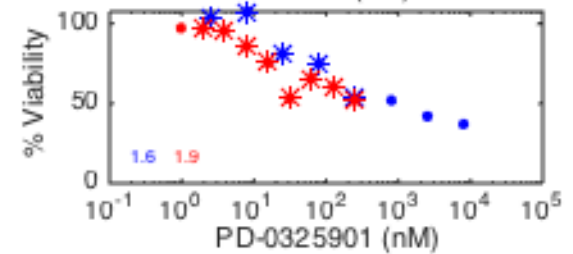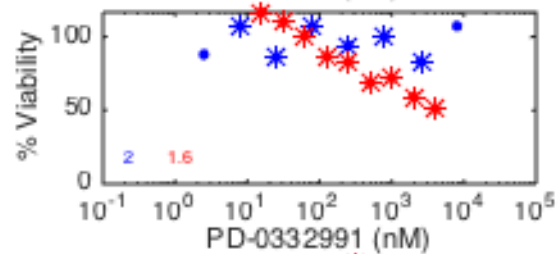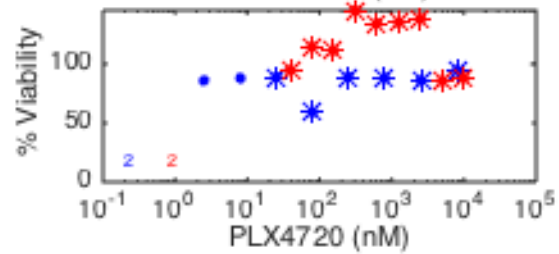

# Calu-3

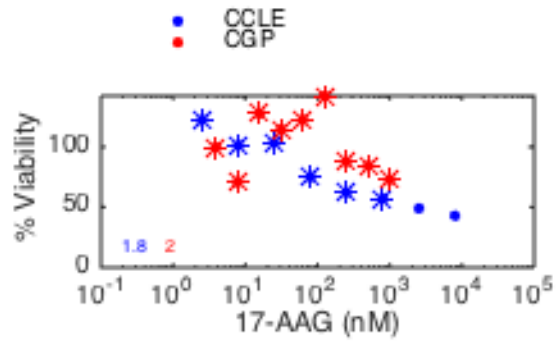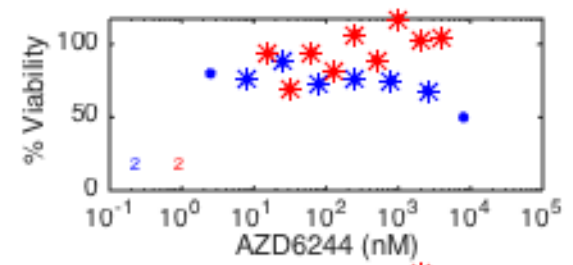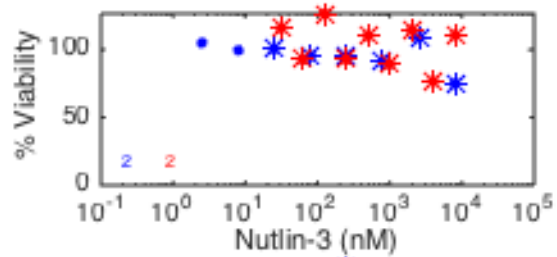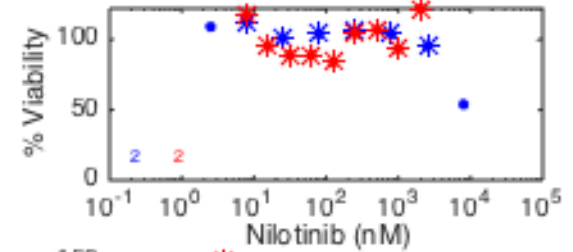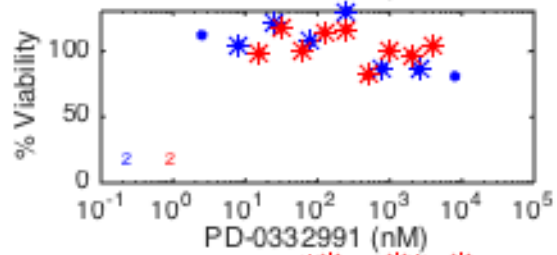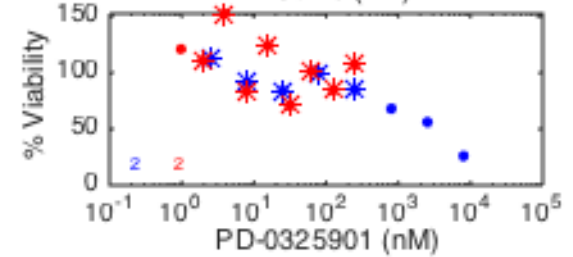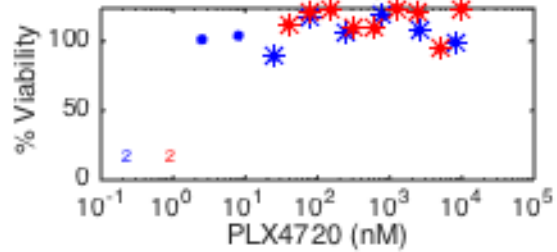

# Calu-6

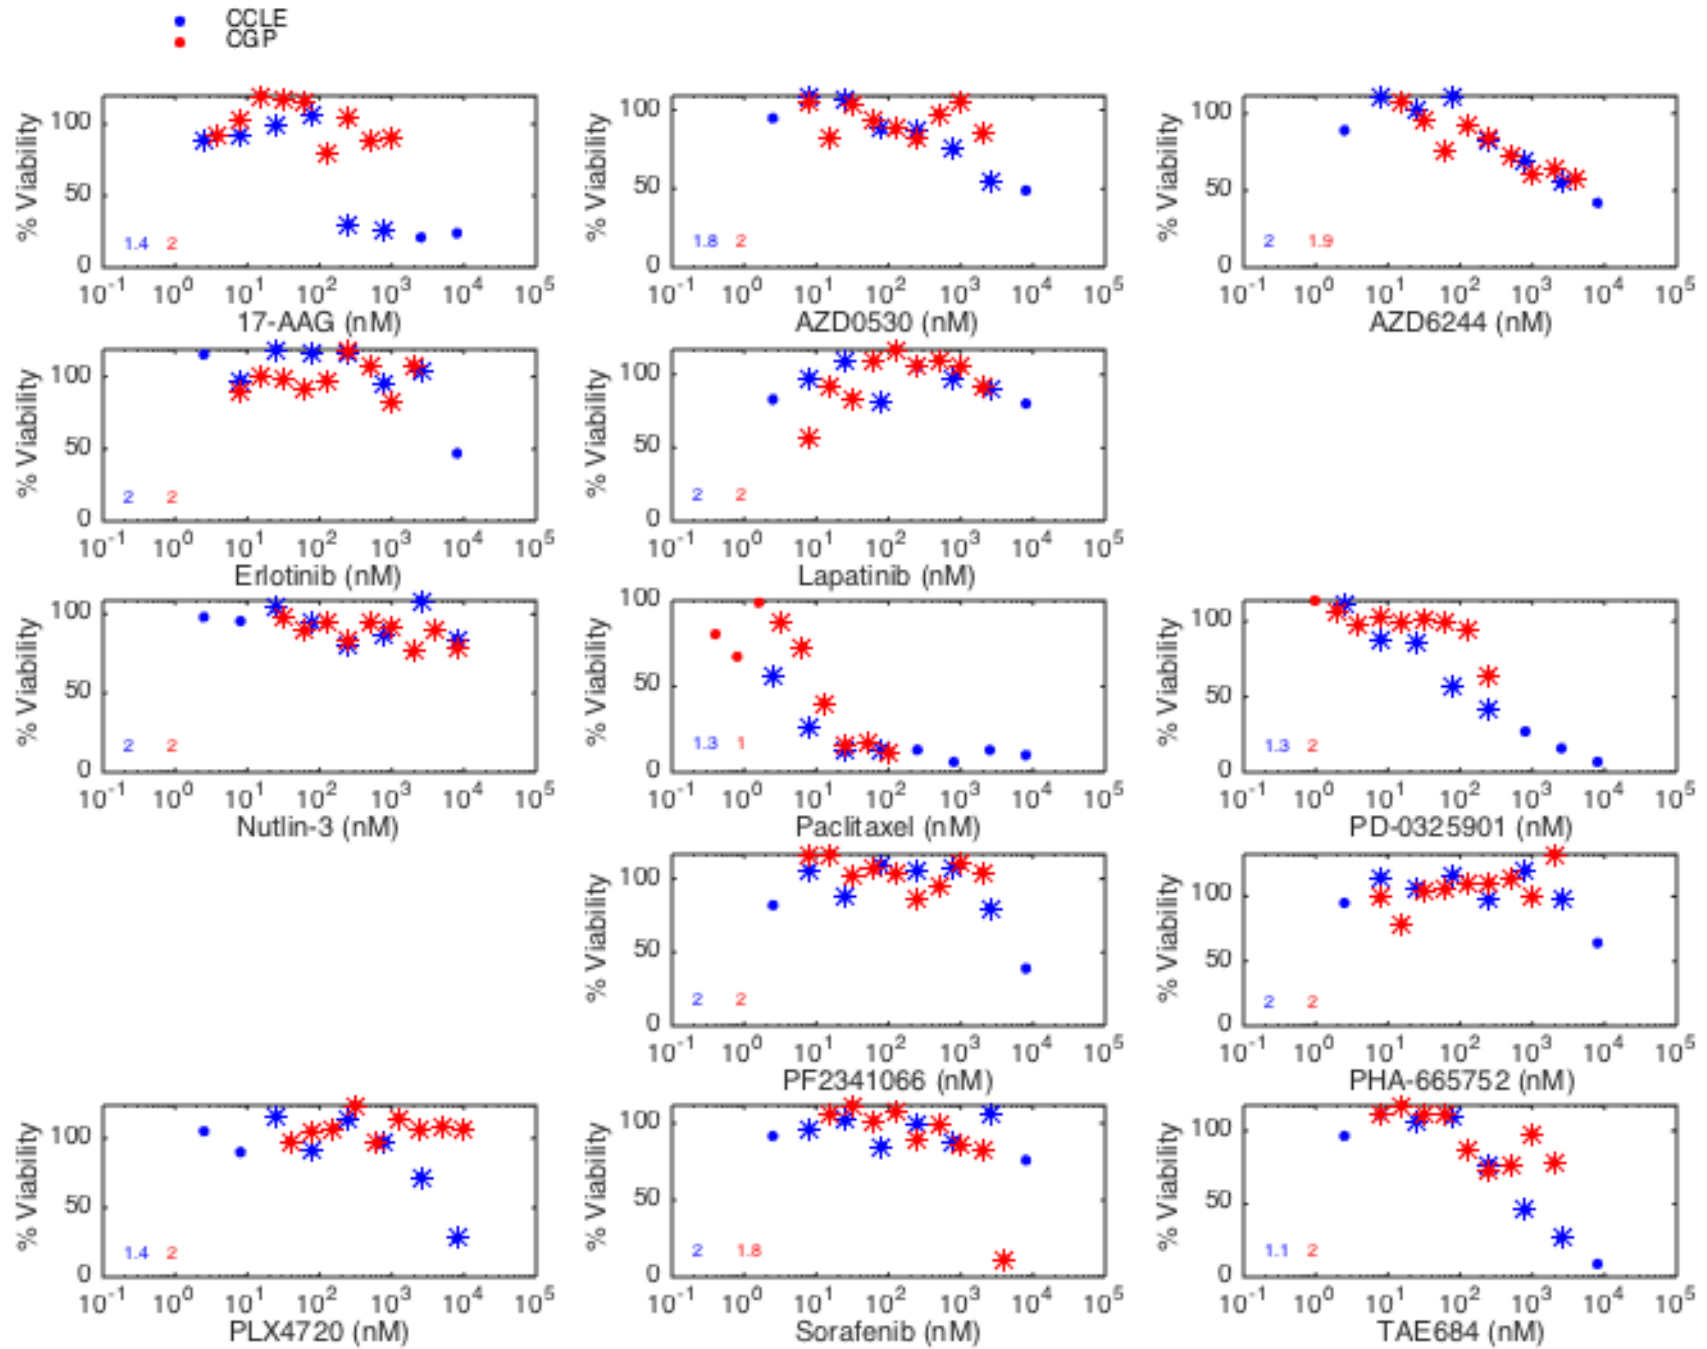

# CAMA-1

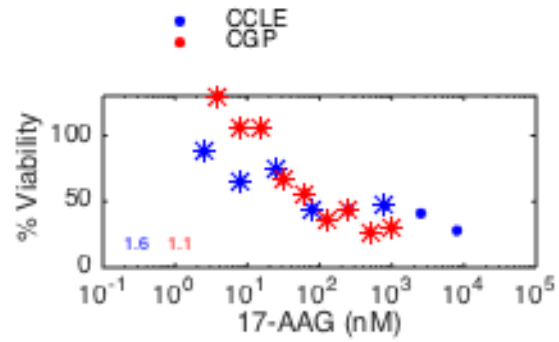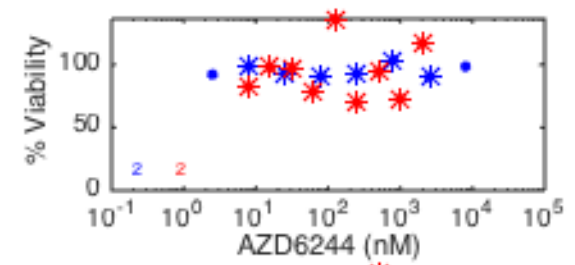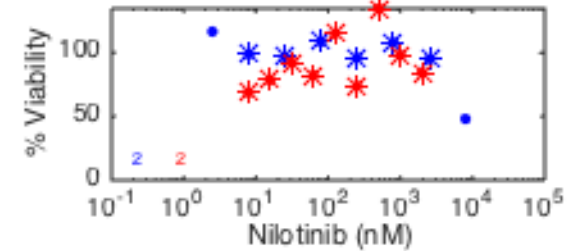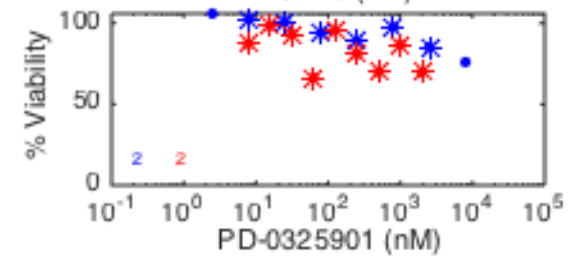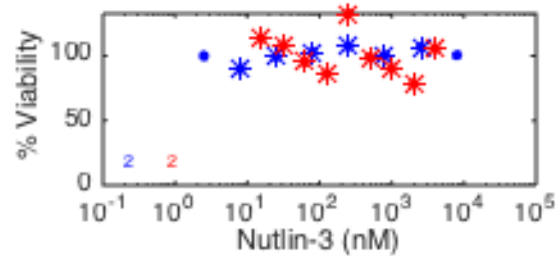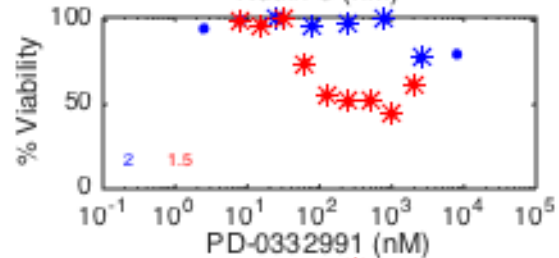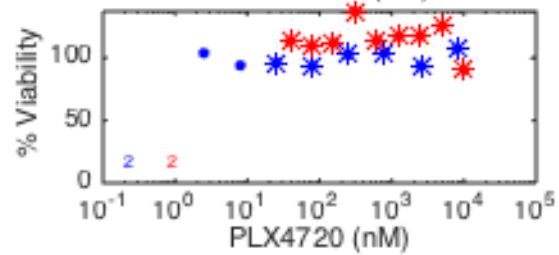



# Capan-2

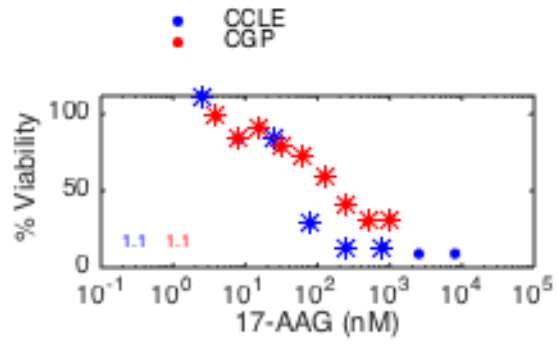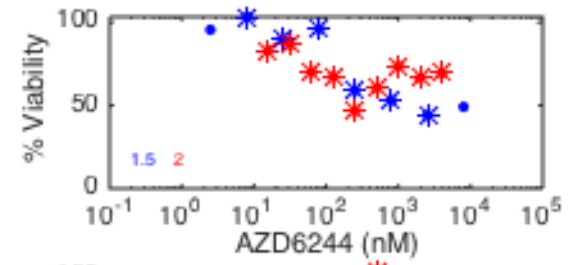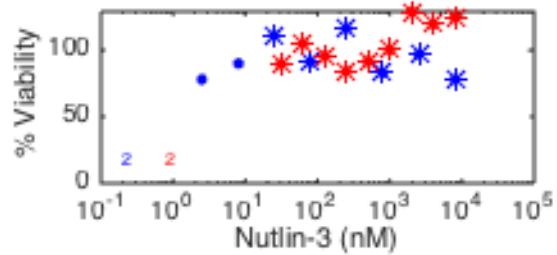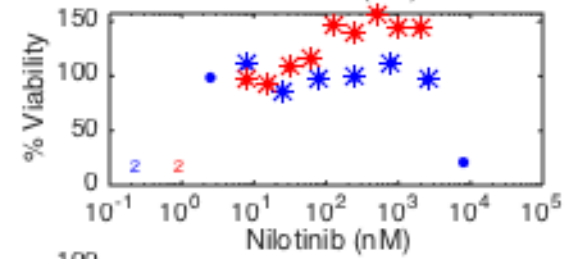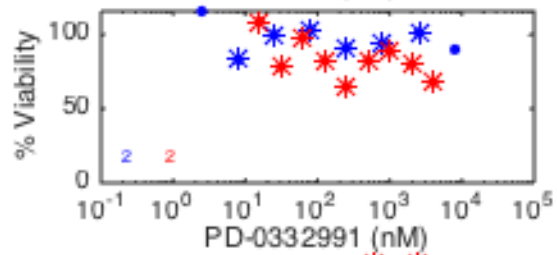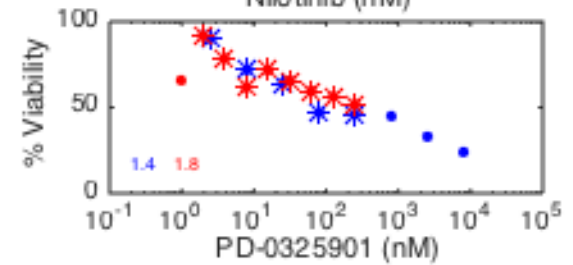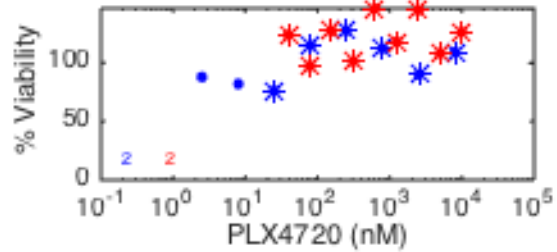

# CAS-1

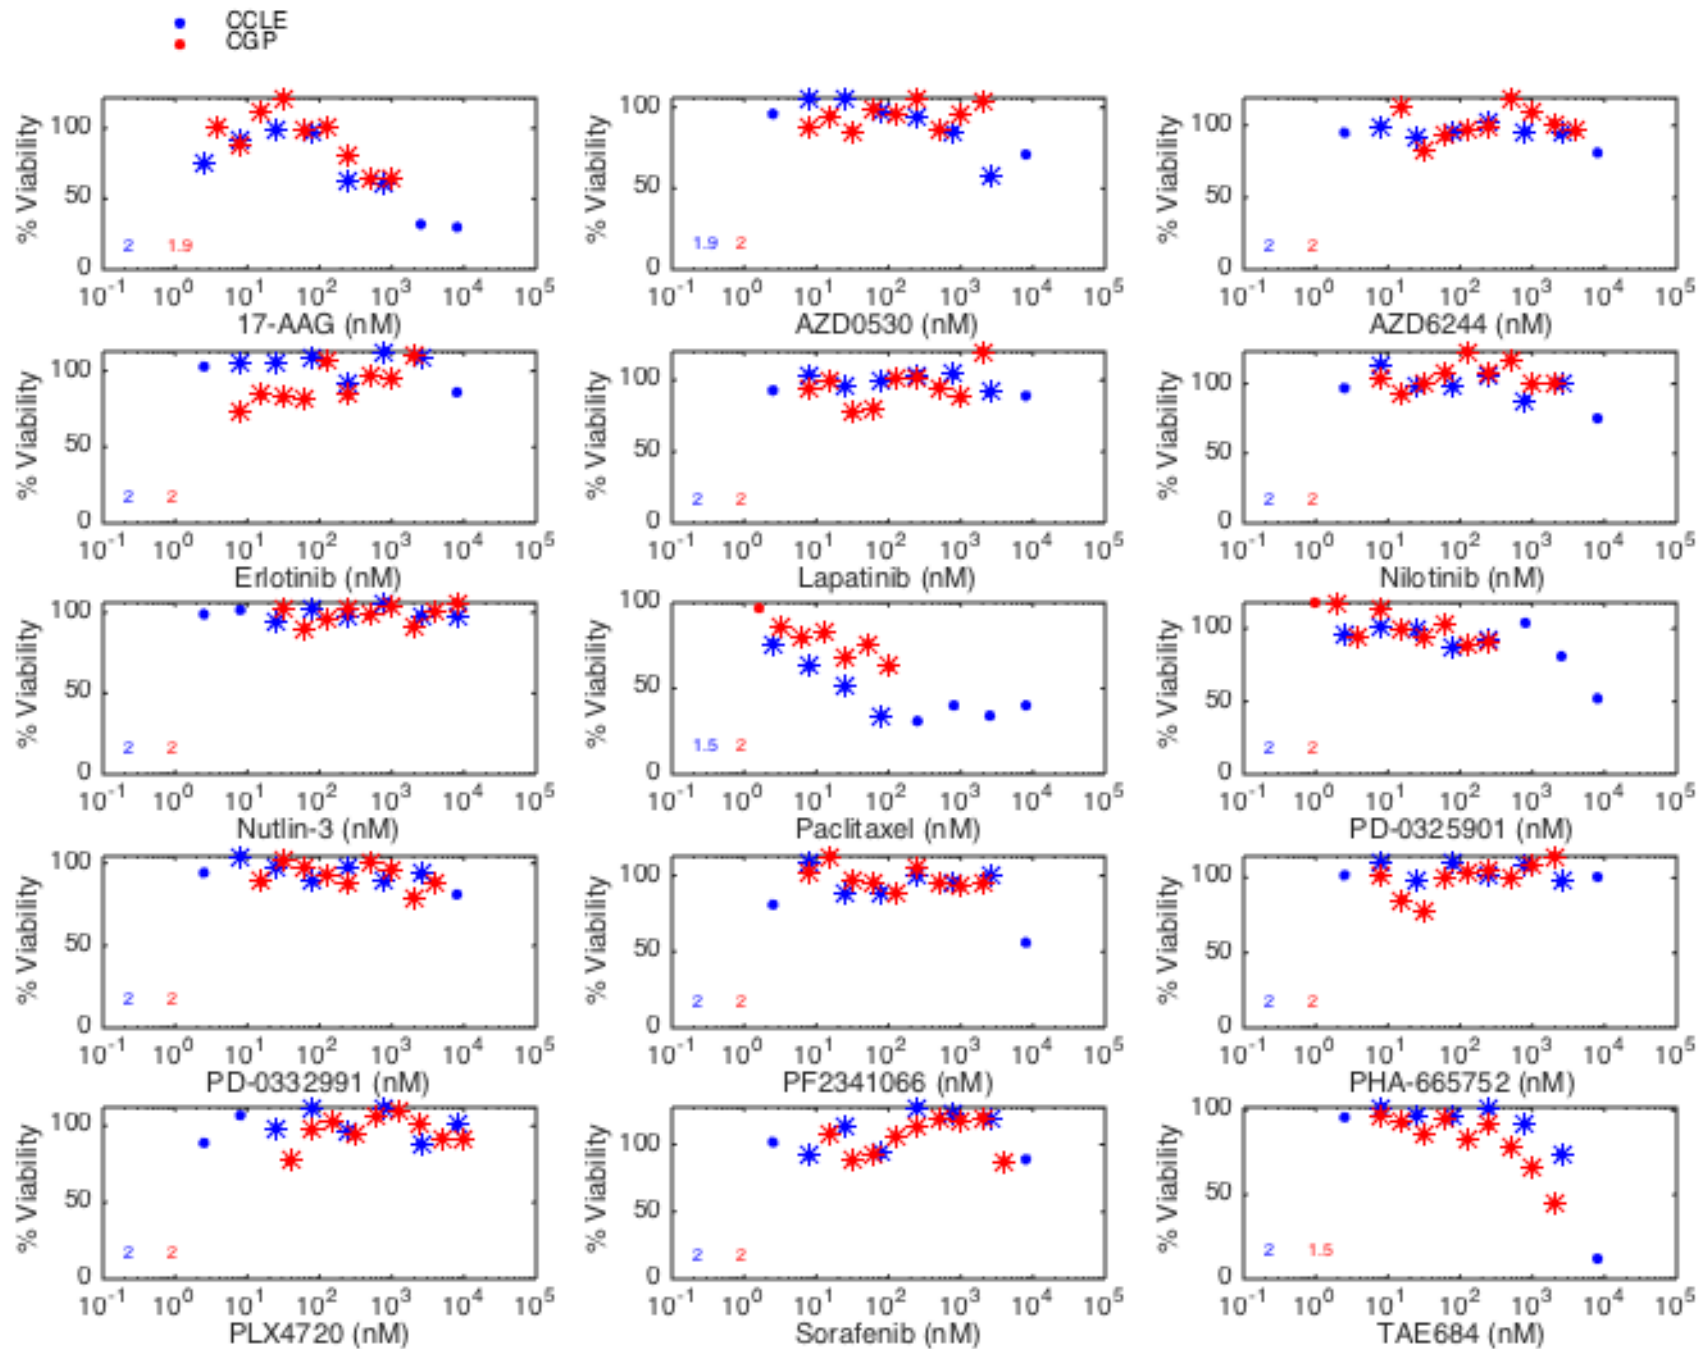

# CHL-1

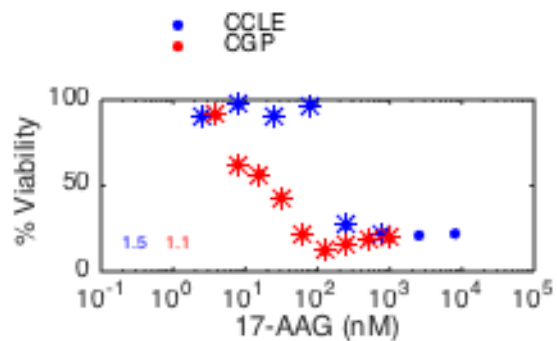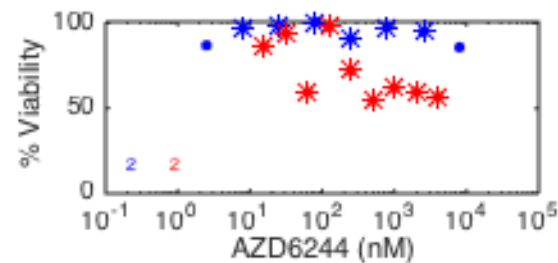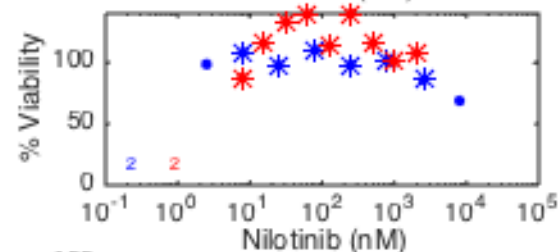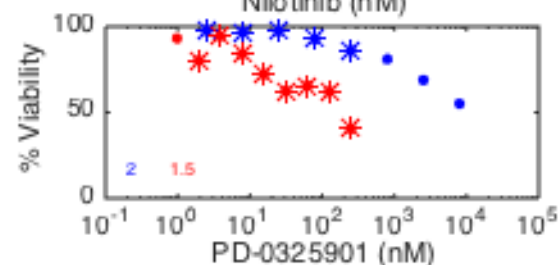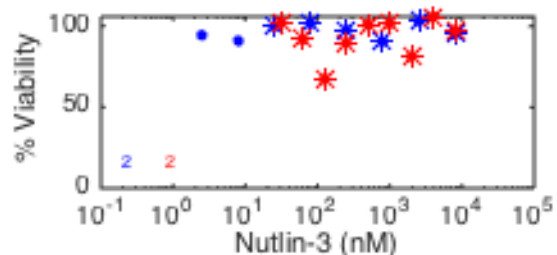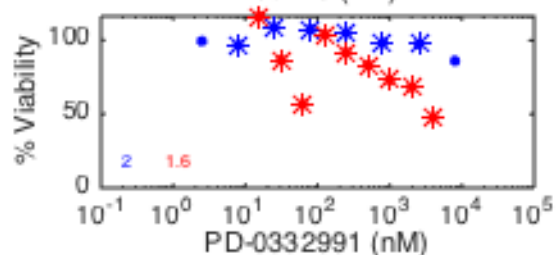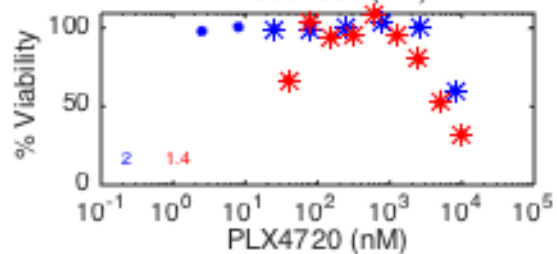

# CHP-212

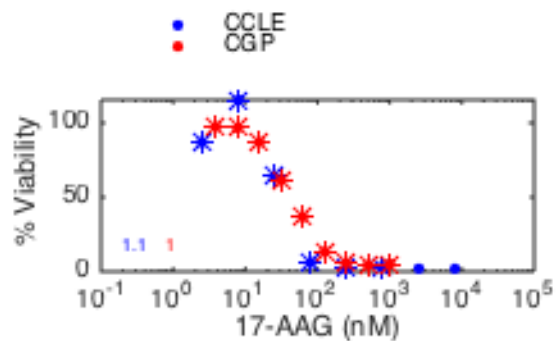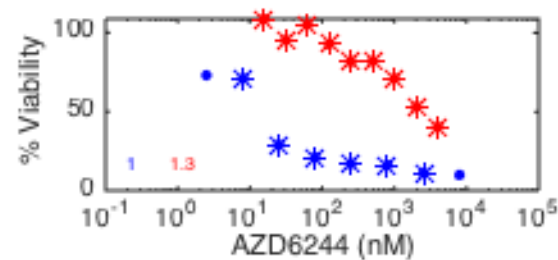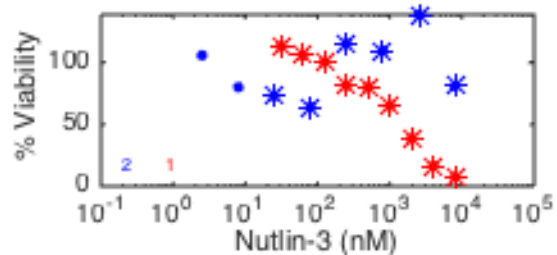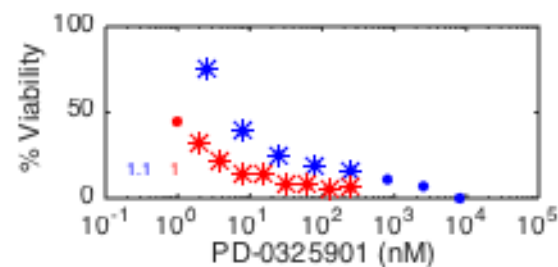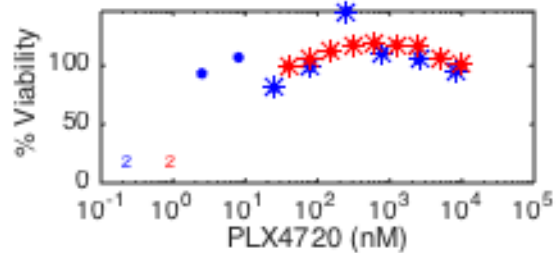

COLO-205

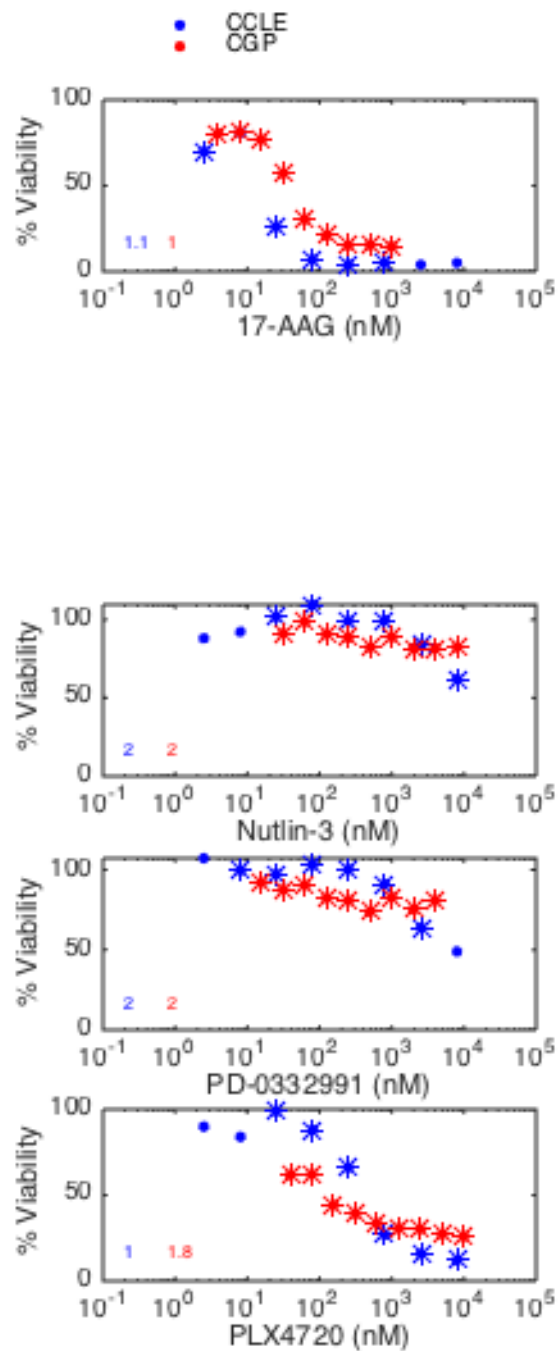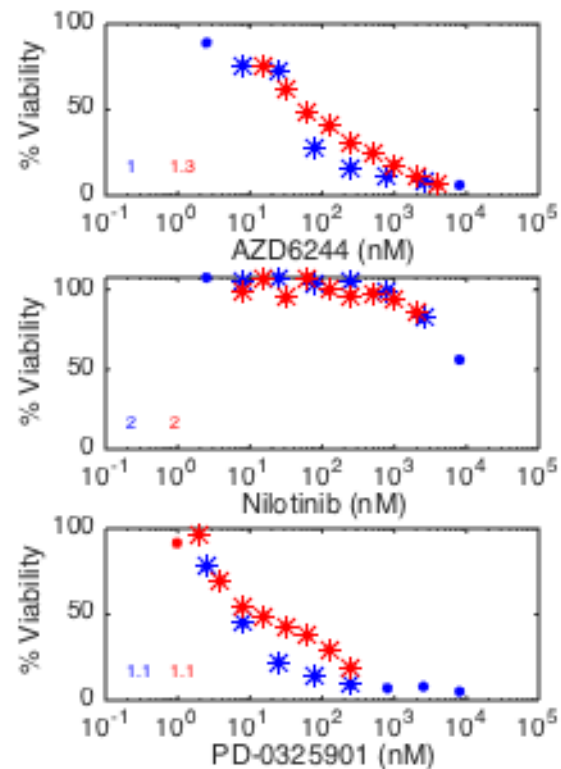

# COLO-320-HSR

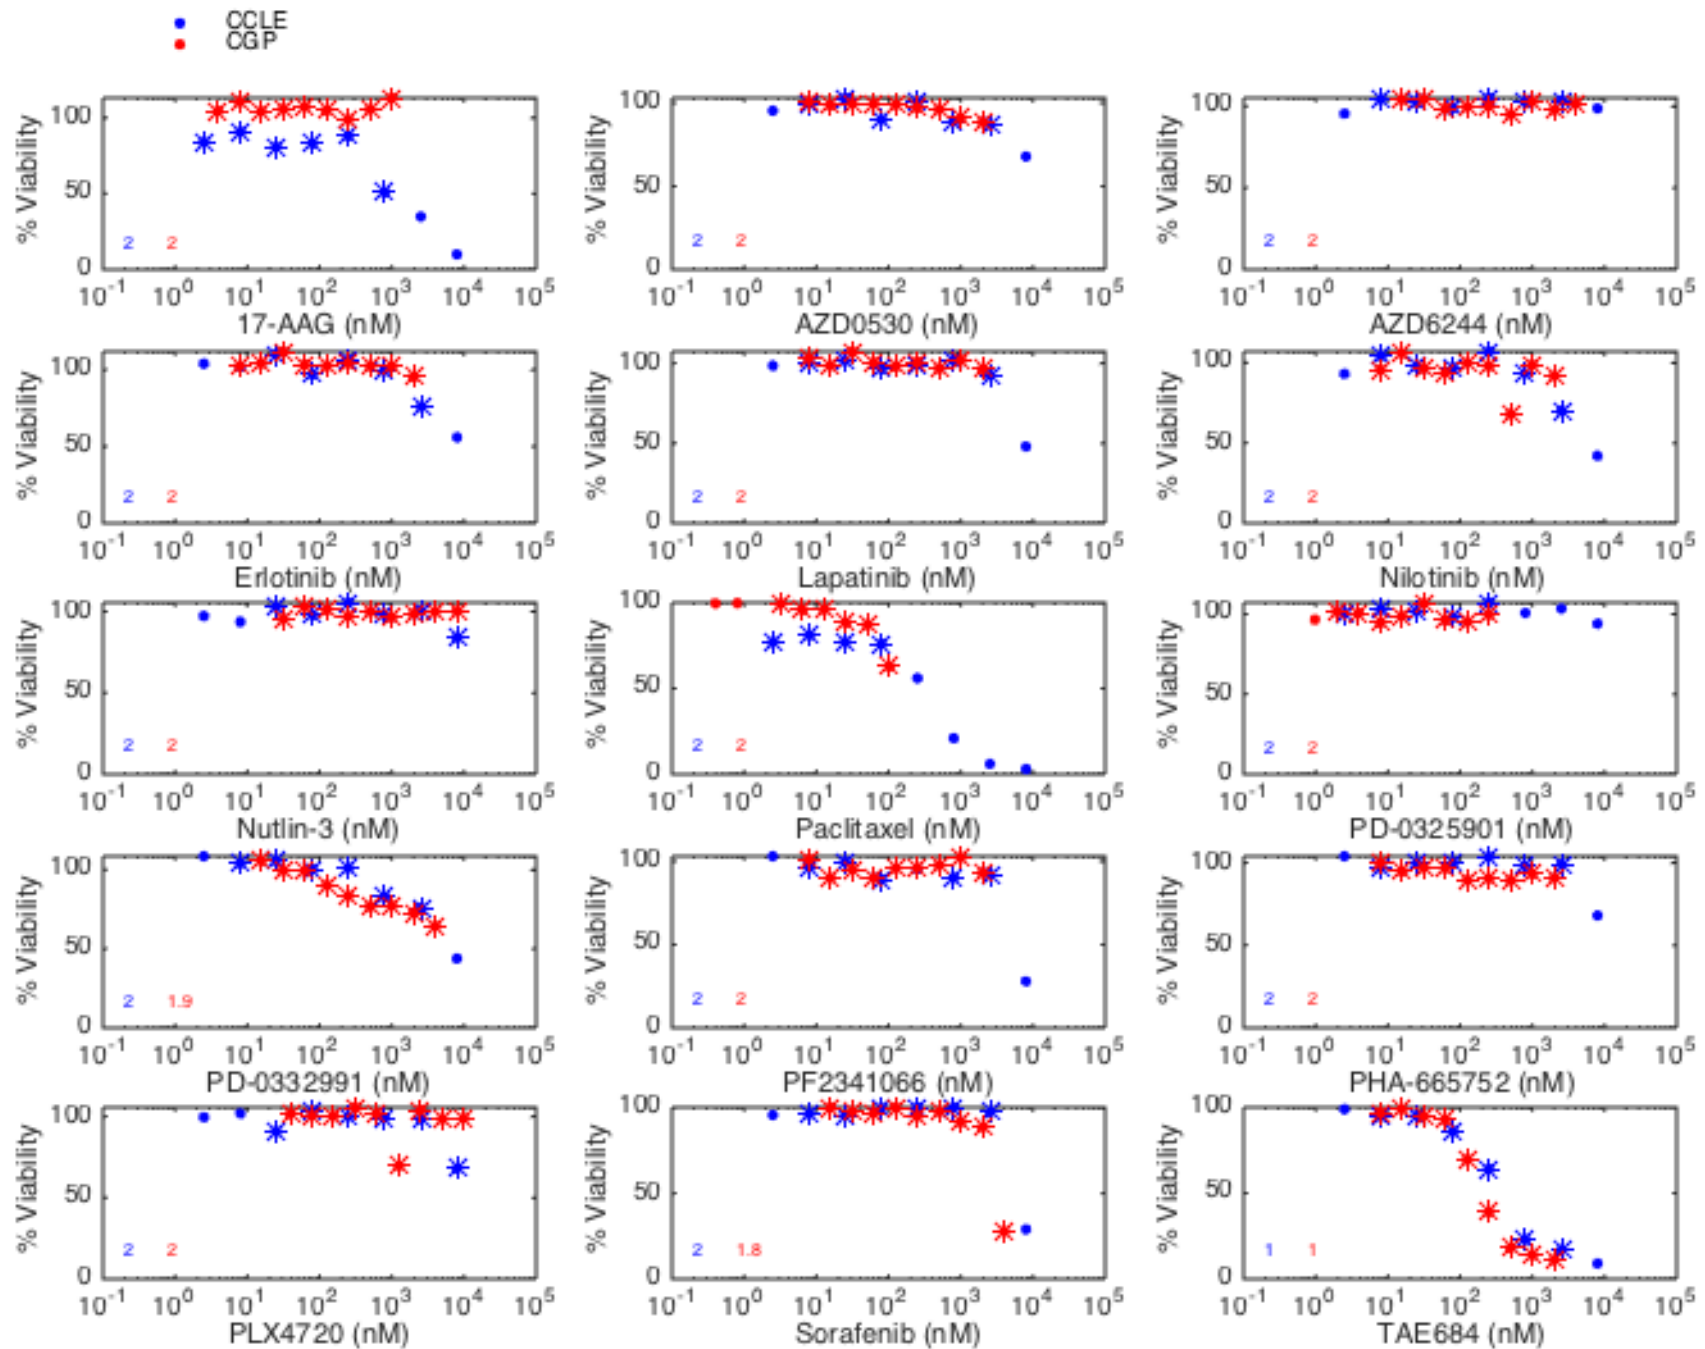

COLO-678

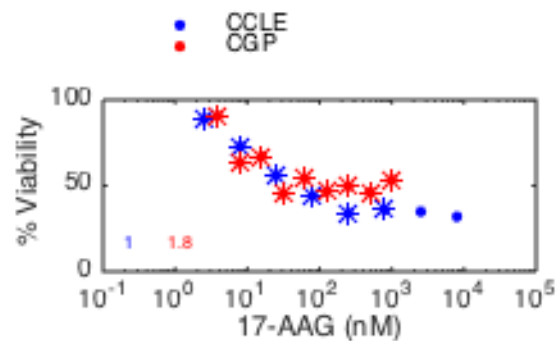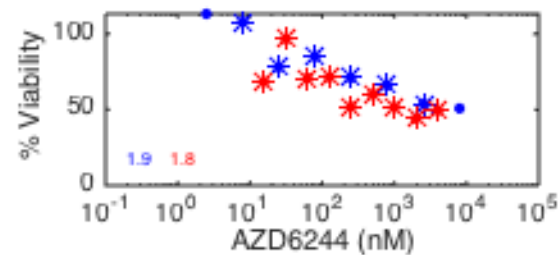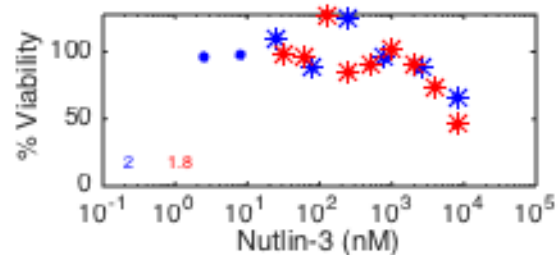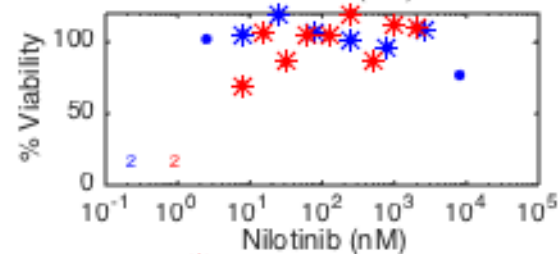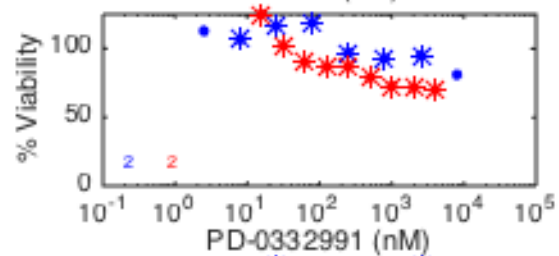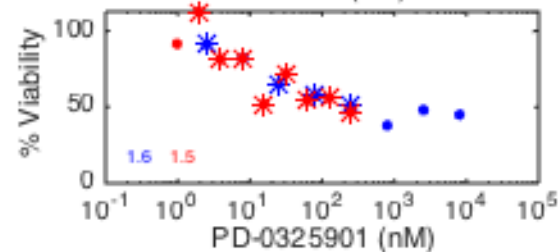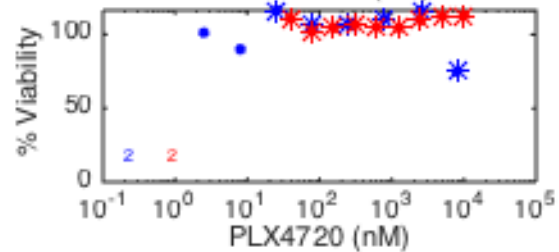

COLO-679

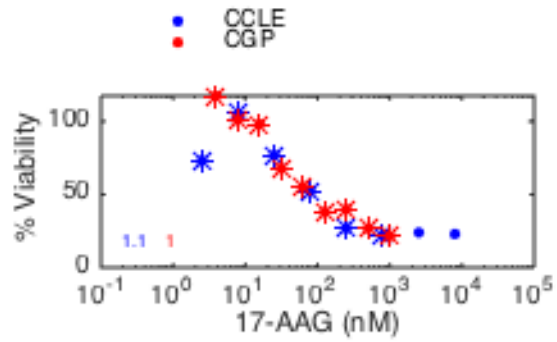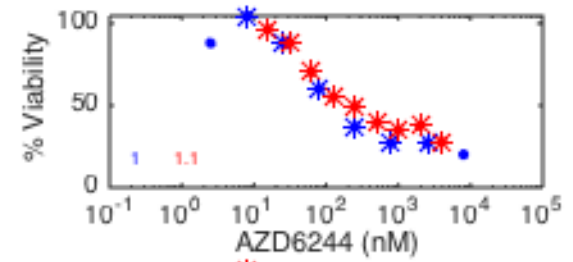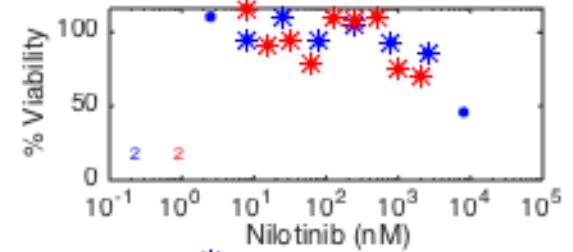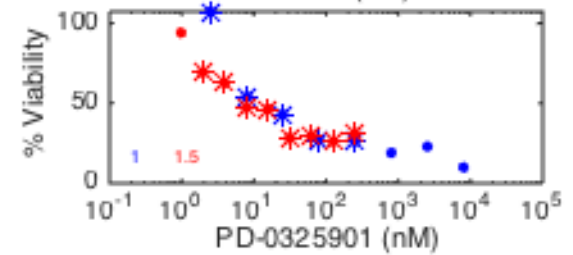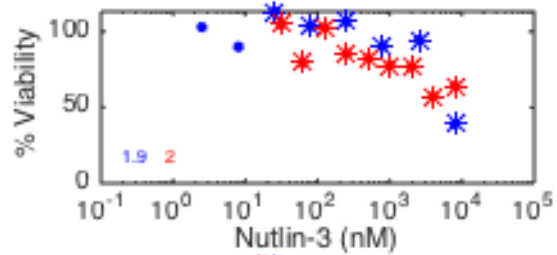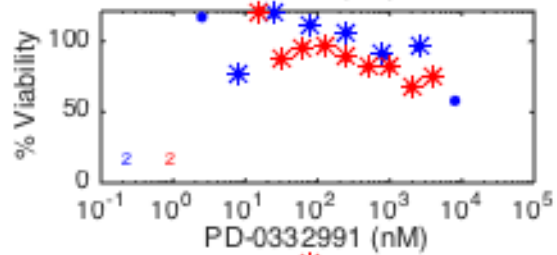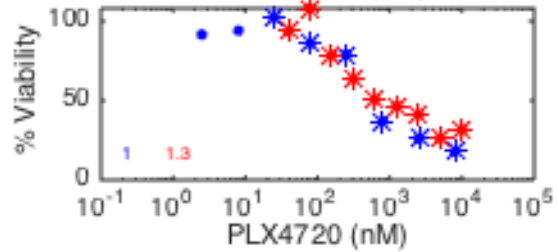



# COLO-741

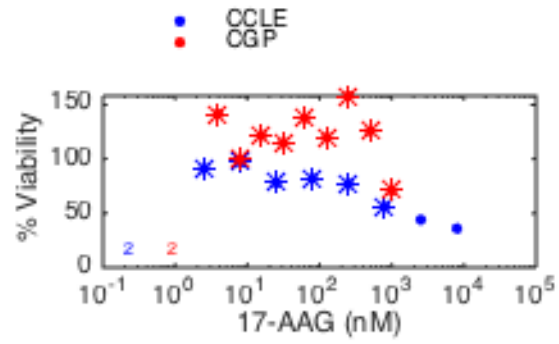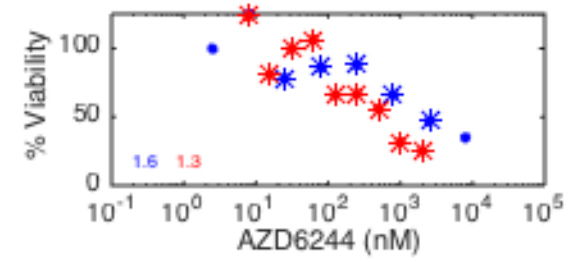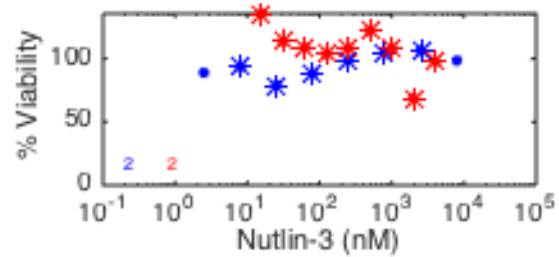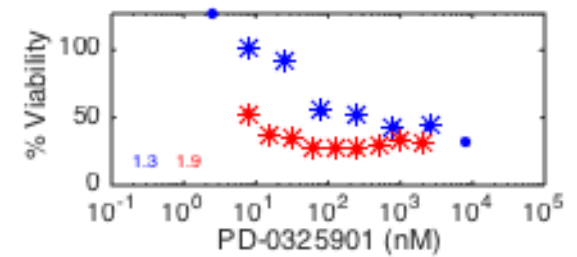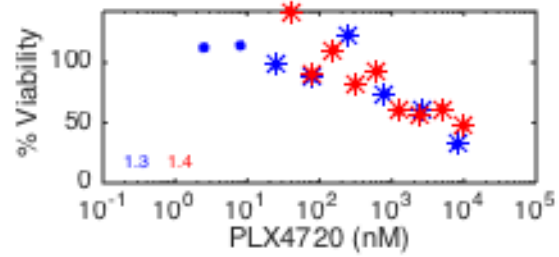

COR-L23

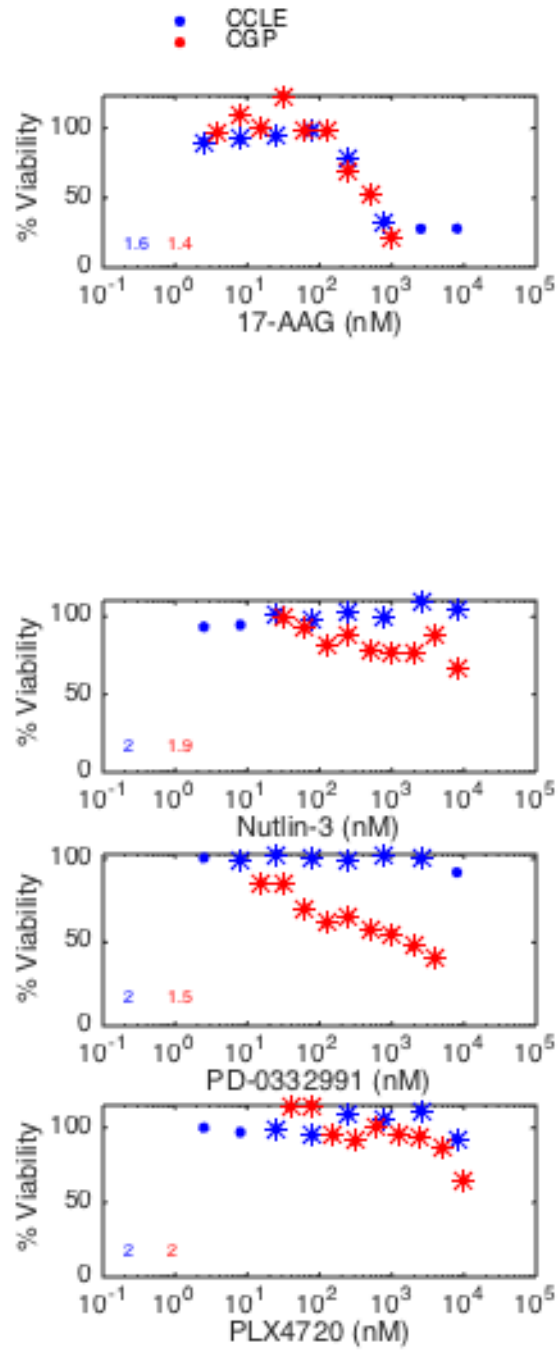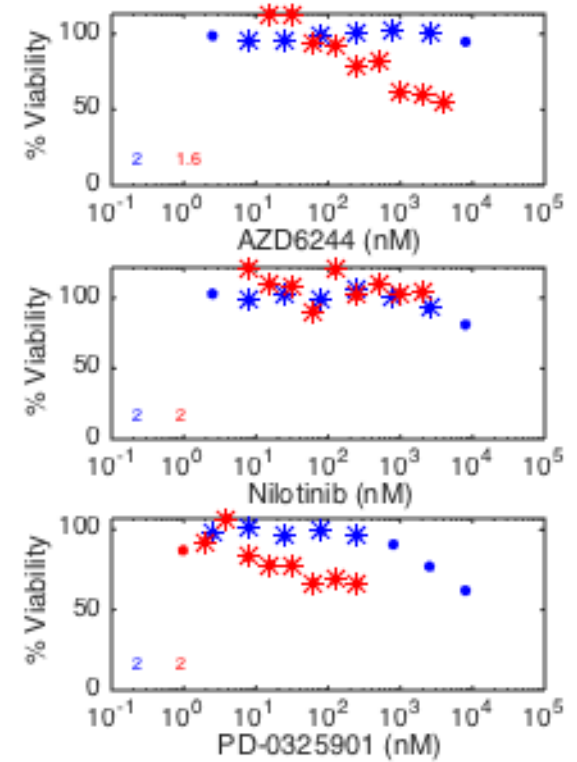

# COR-L105

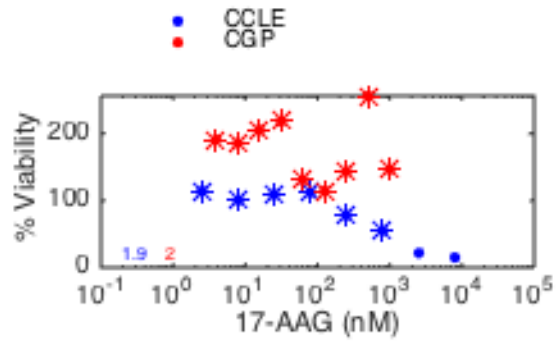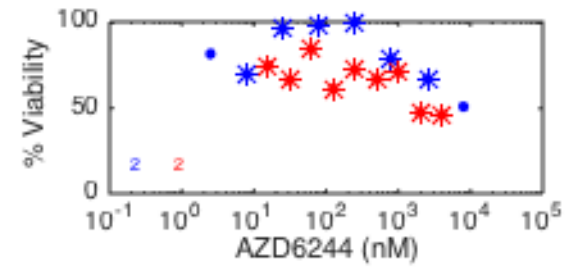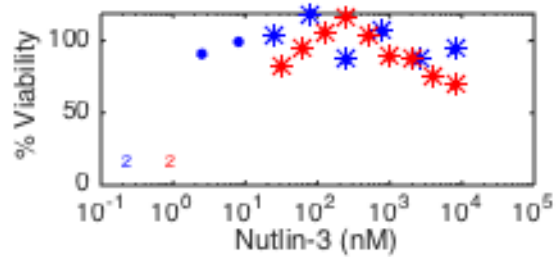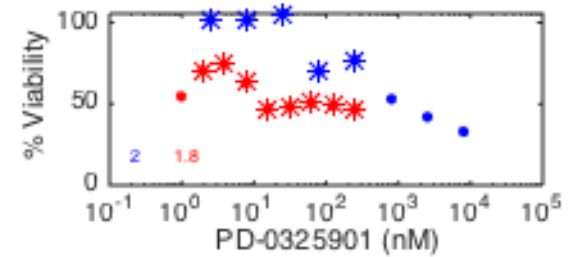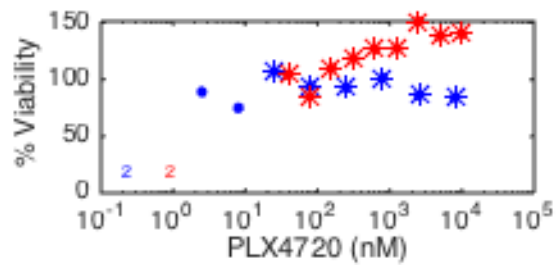

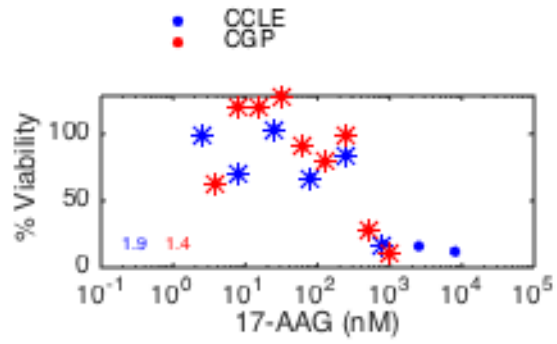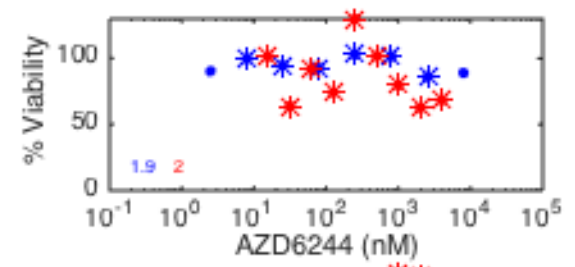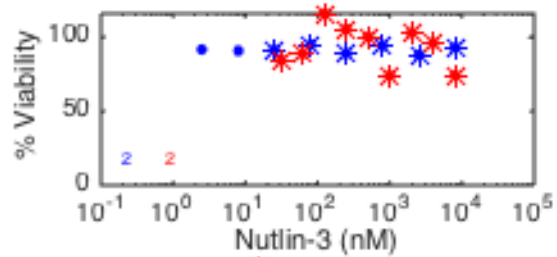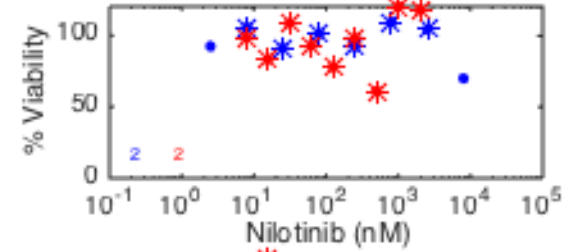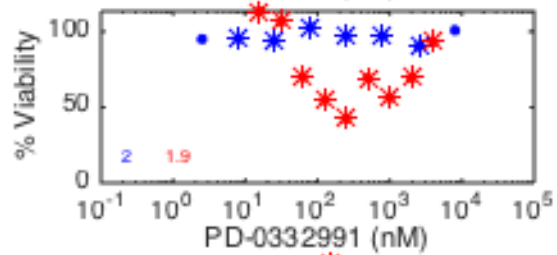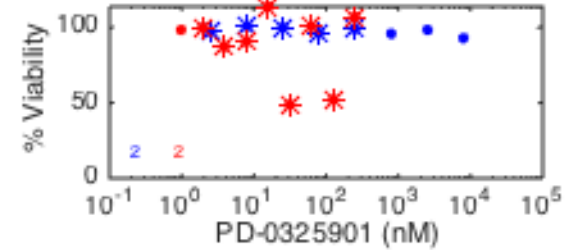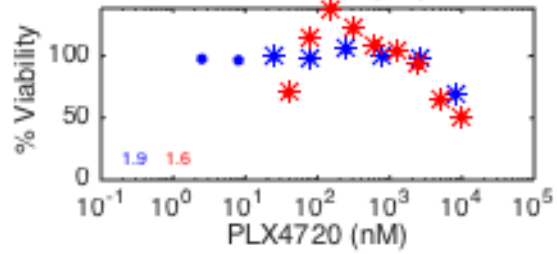

DBTRG-05MG

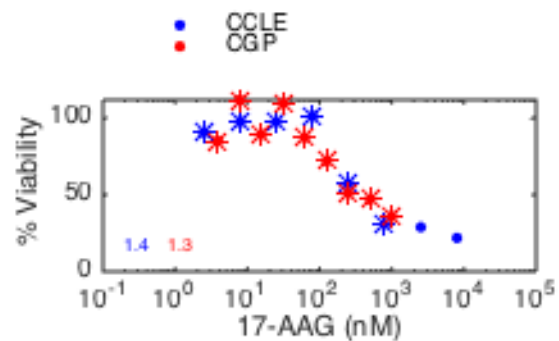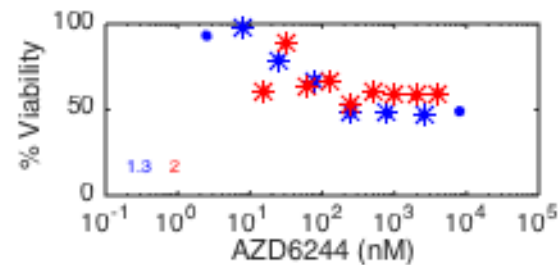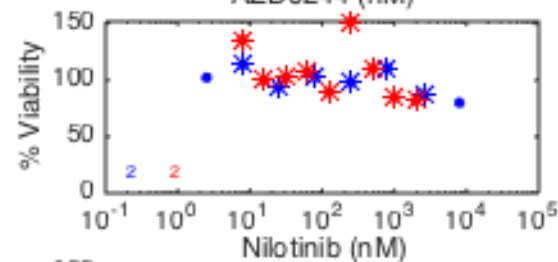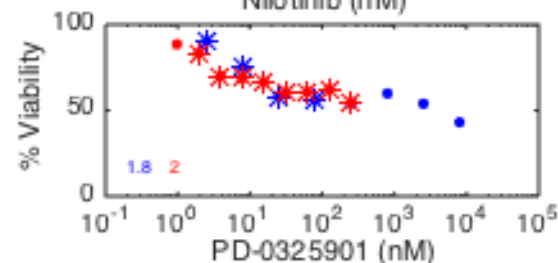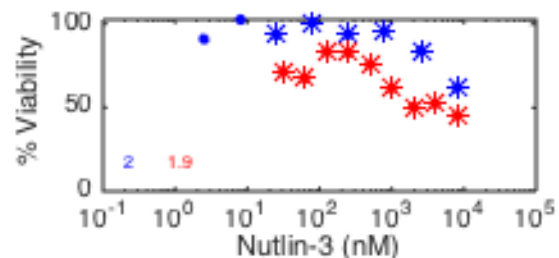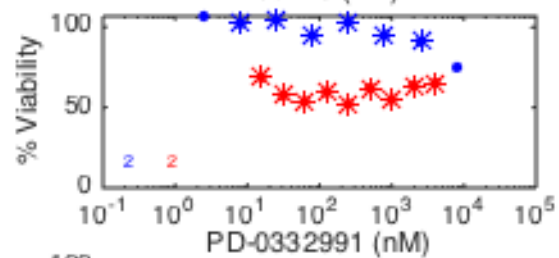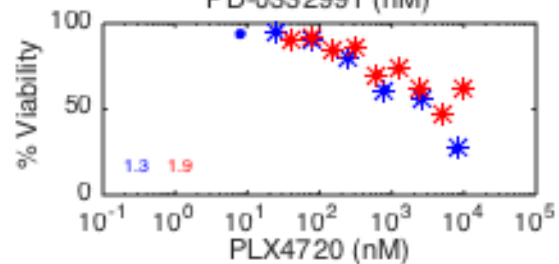

# DEL

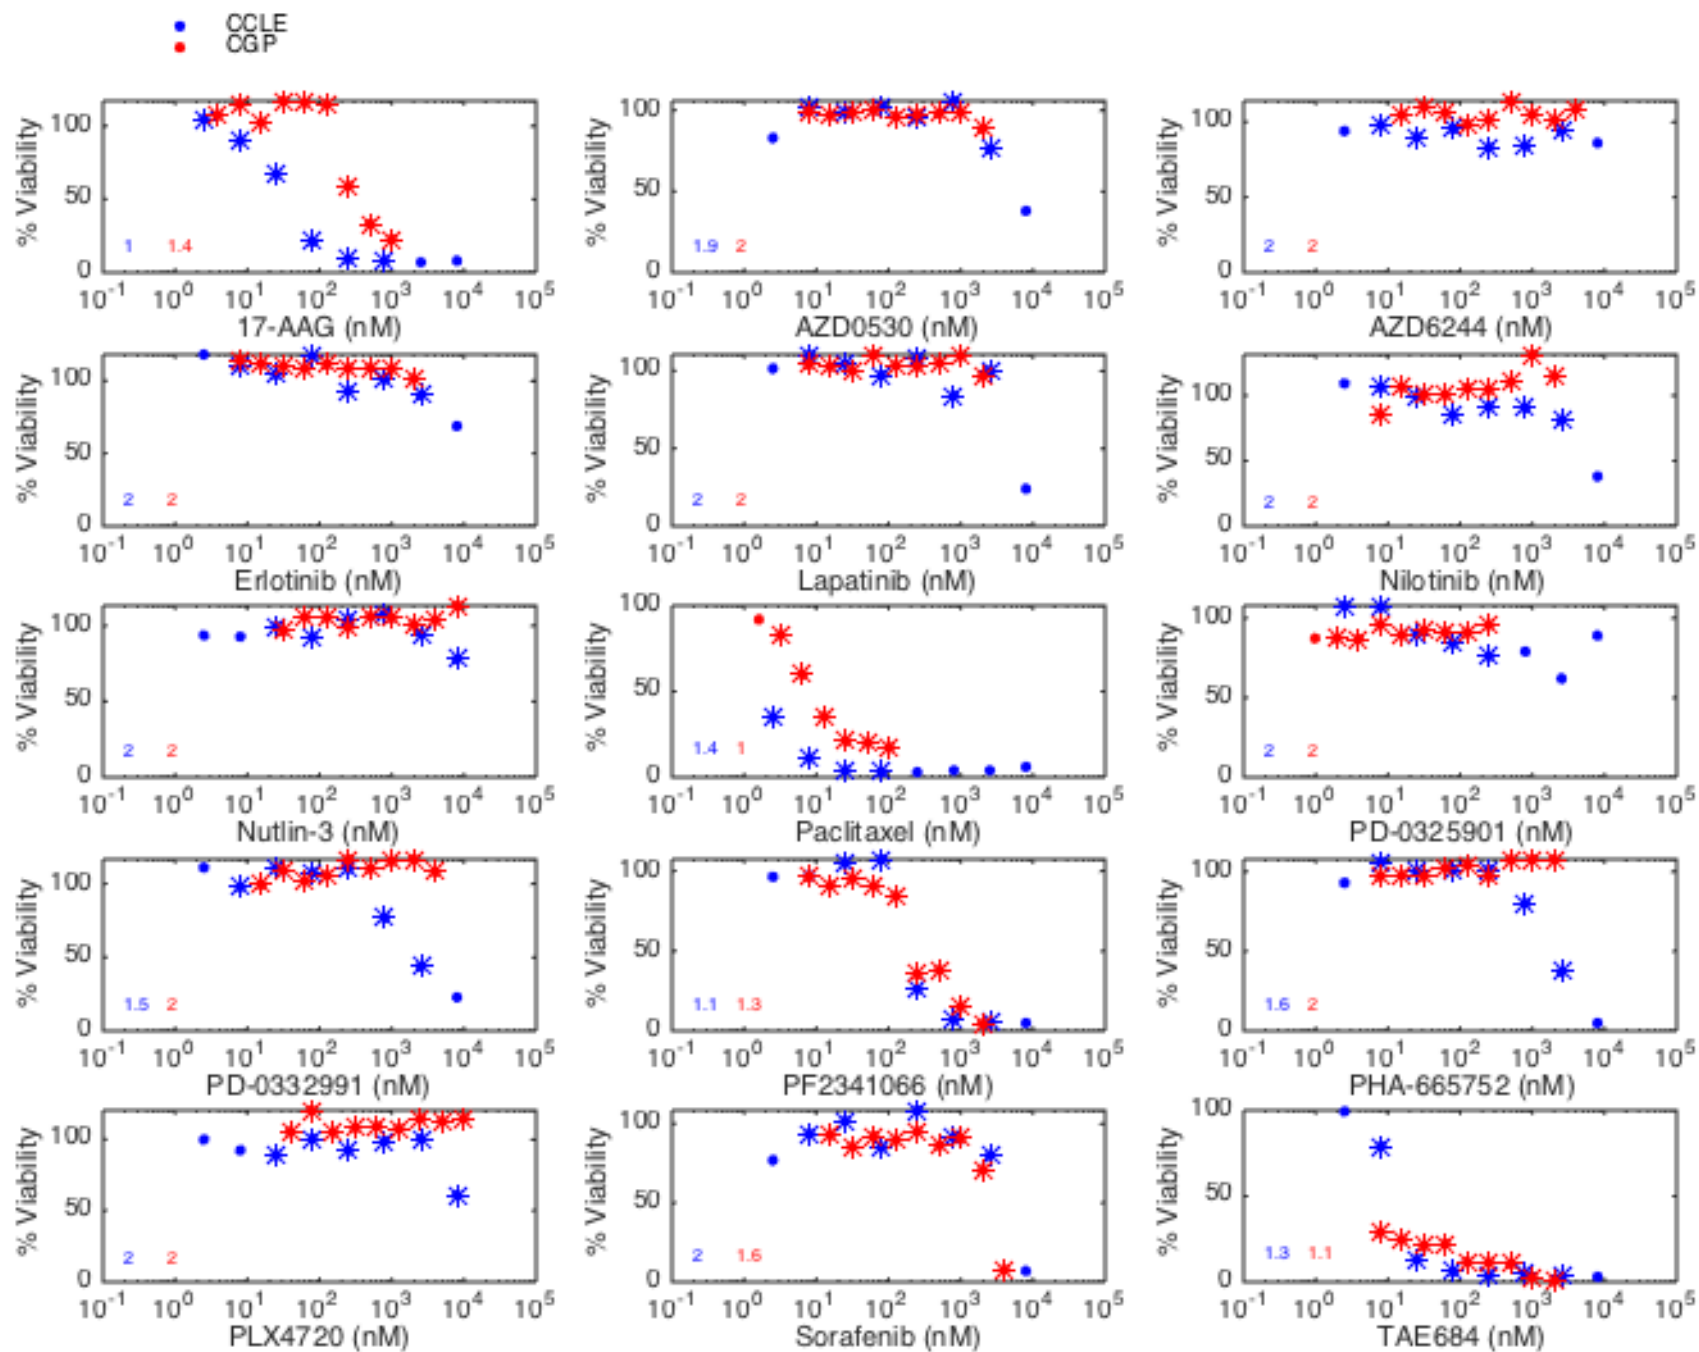

Detroit562

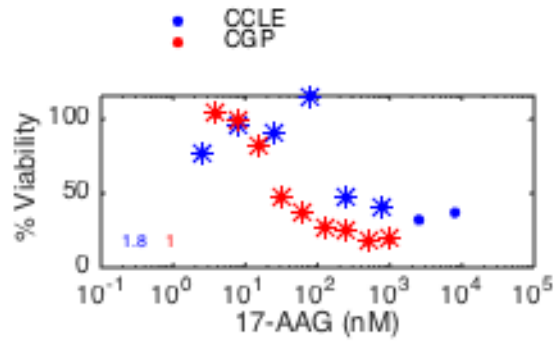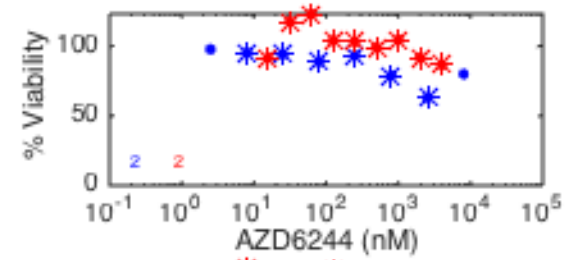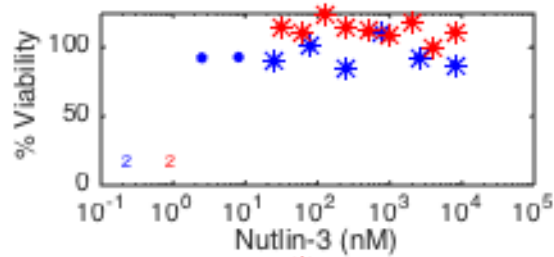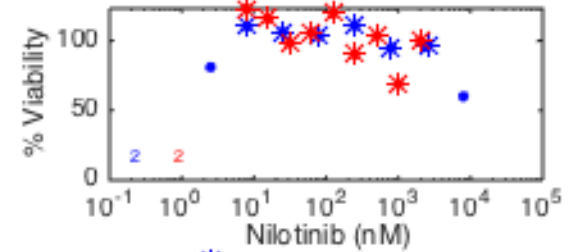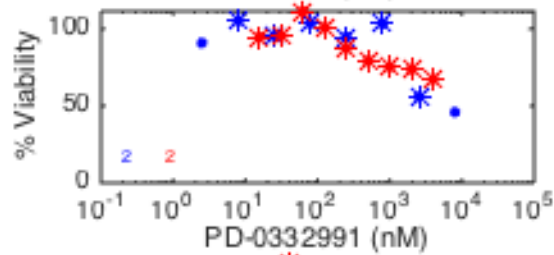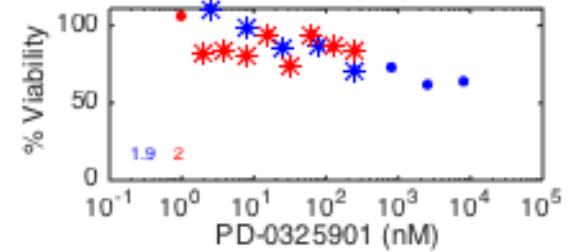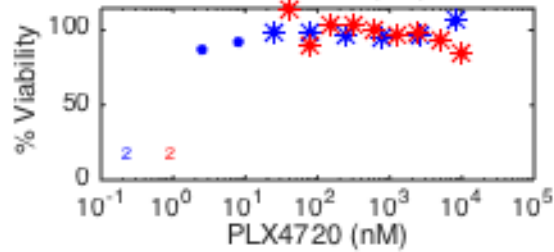

DK-MG

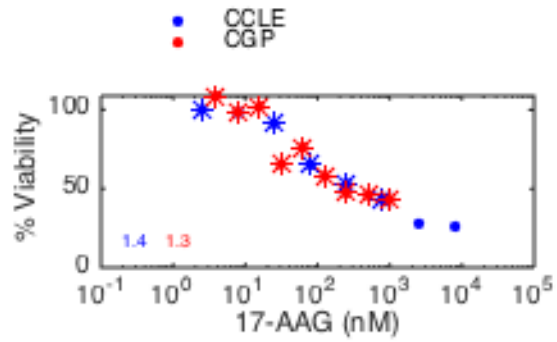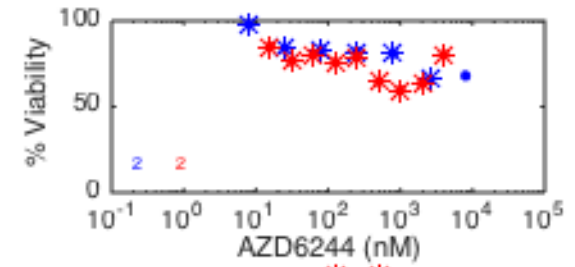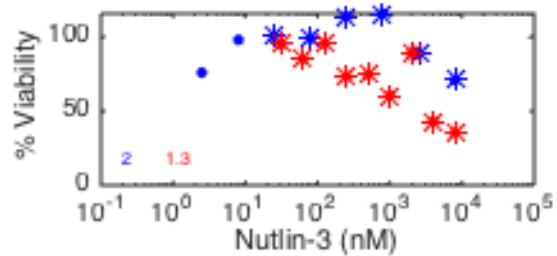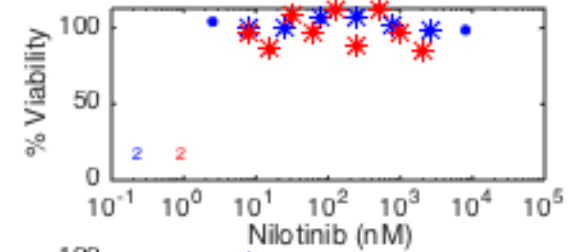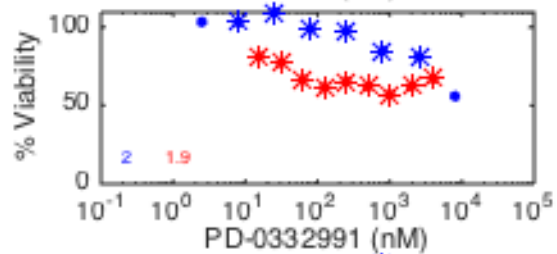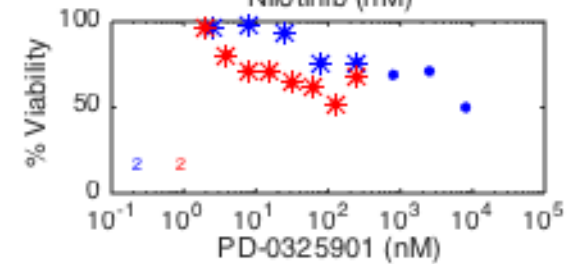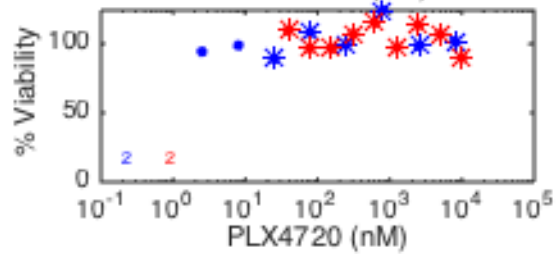



# DMS-114

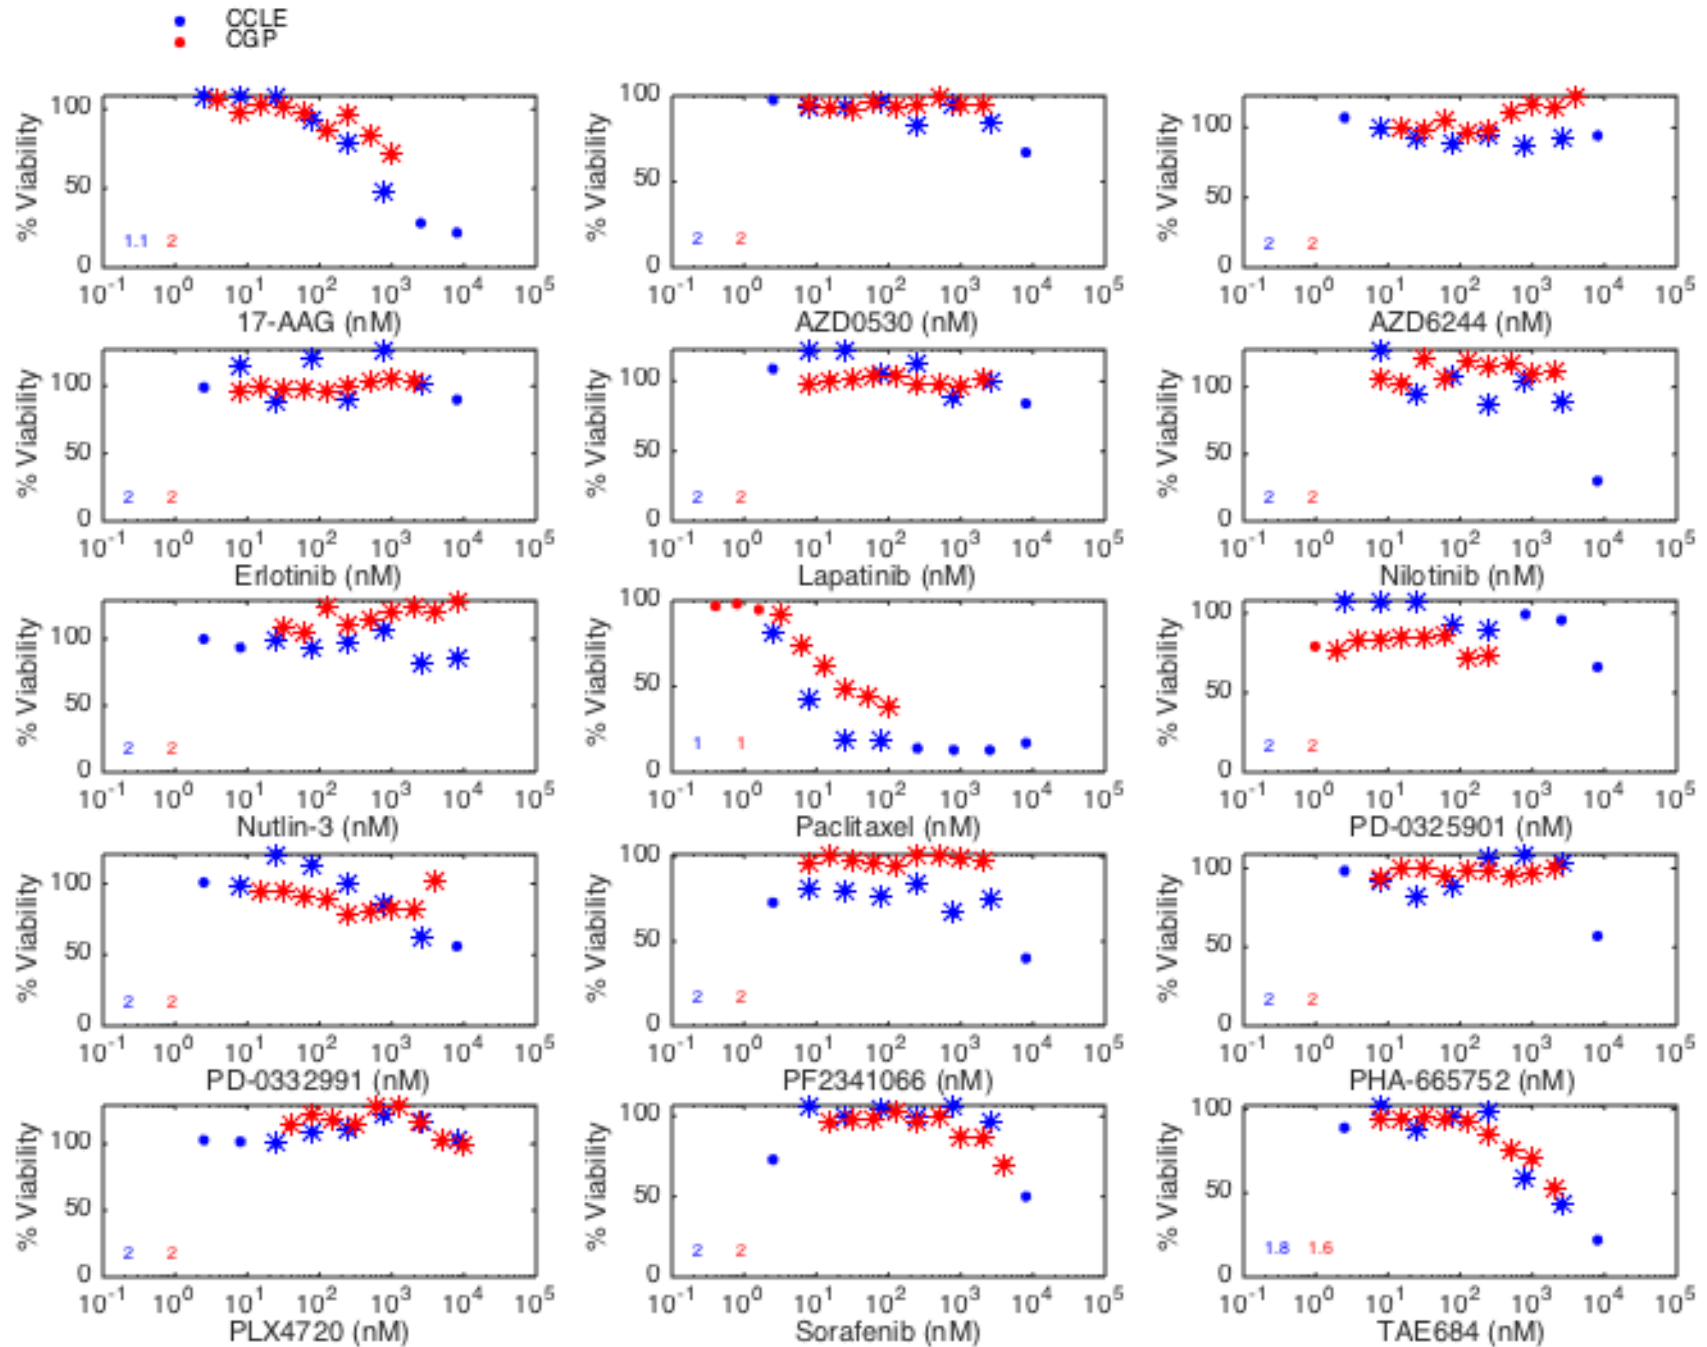

## DOHH-2

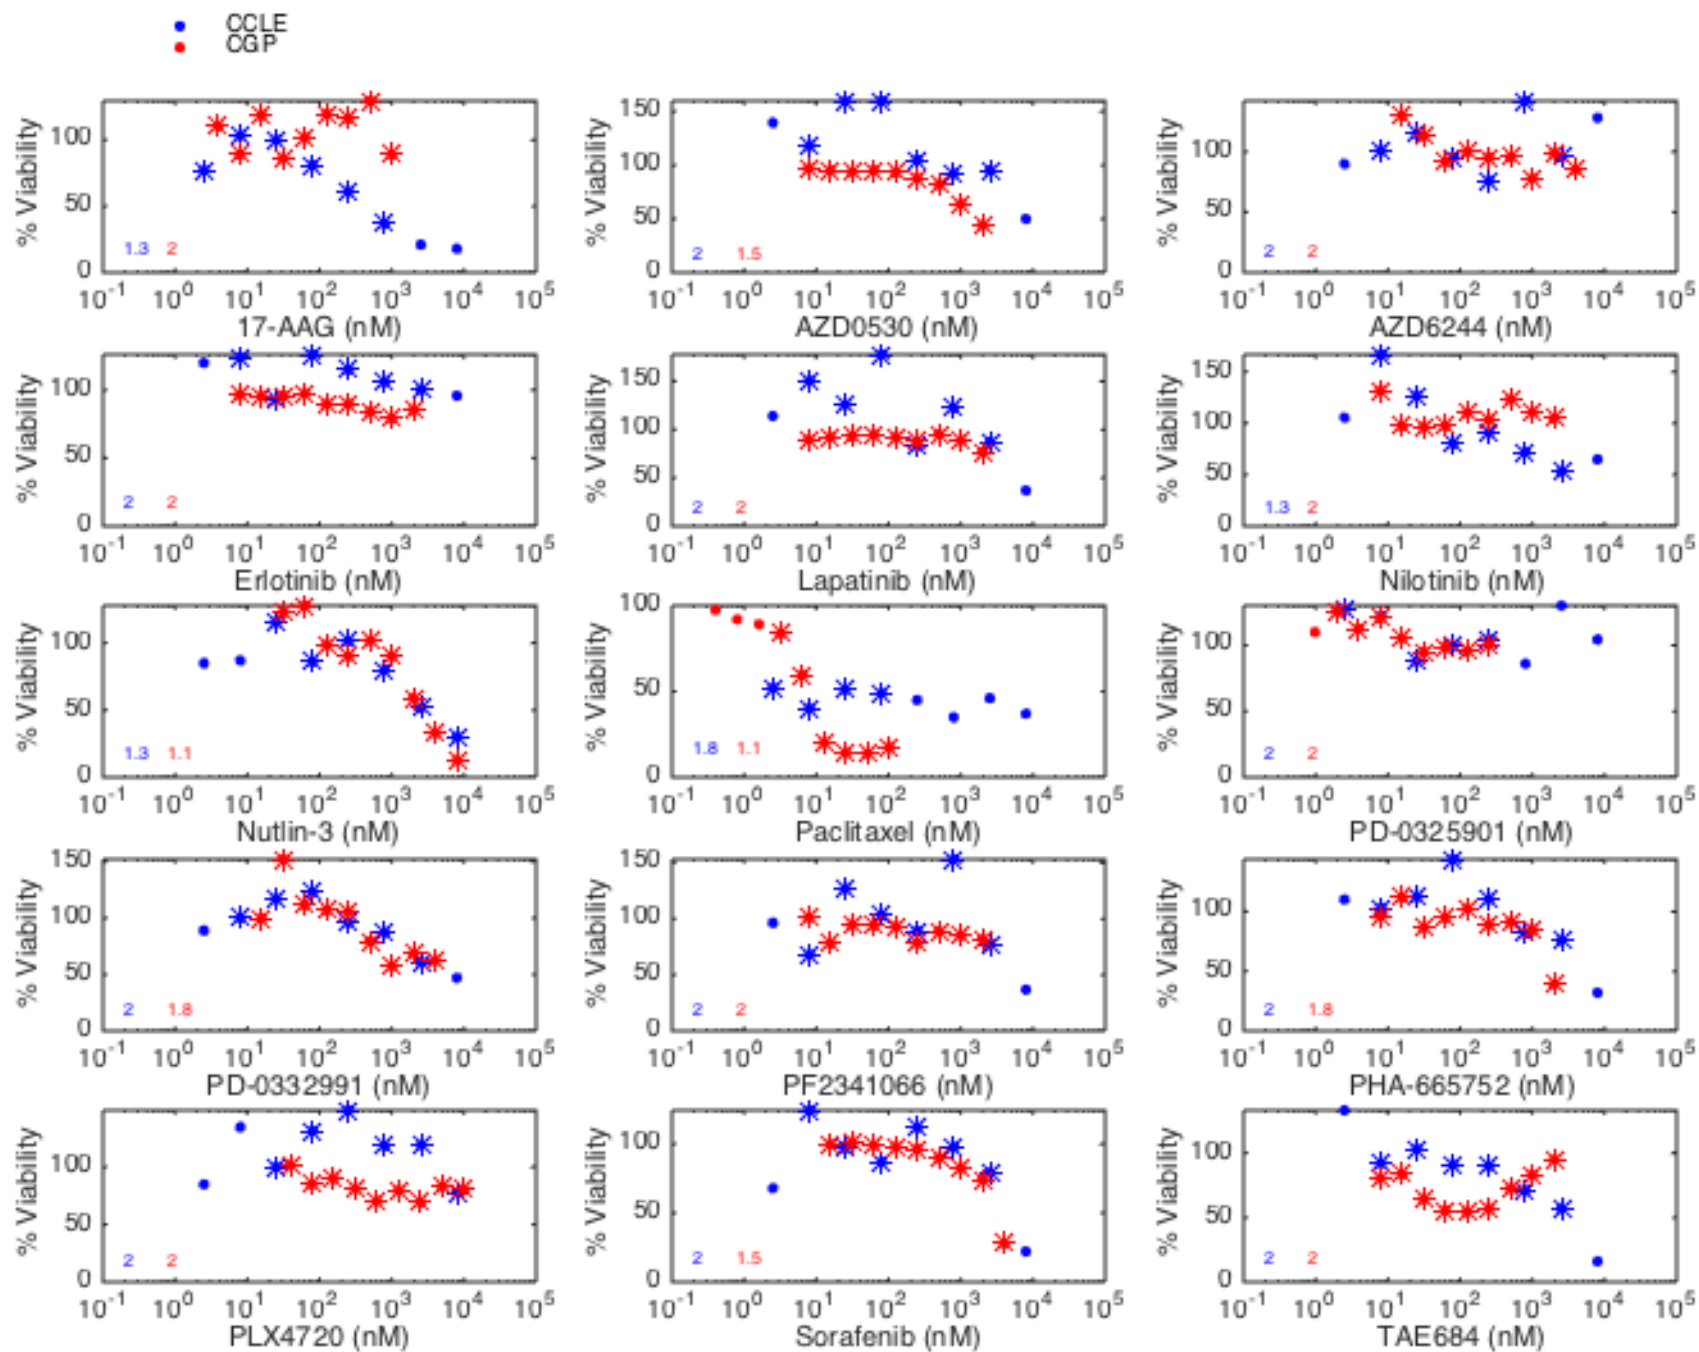

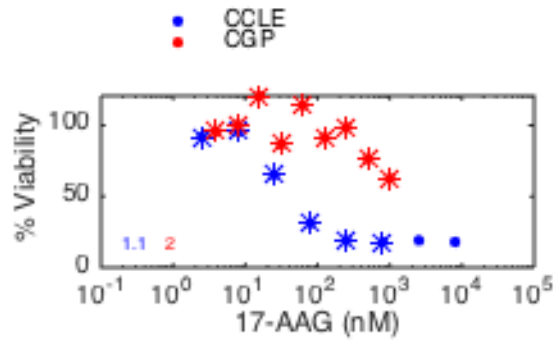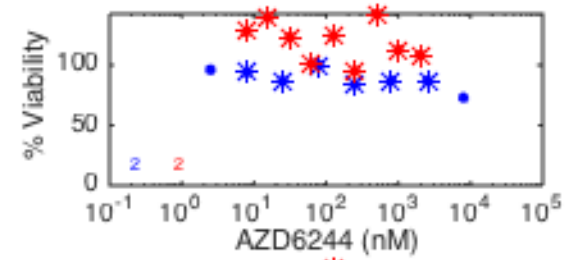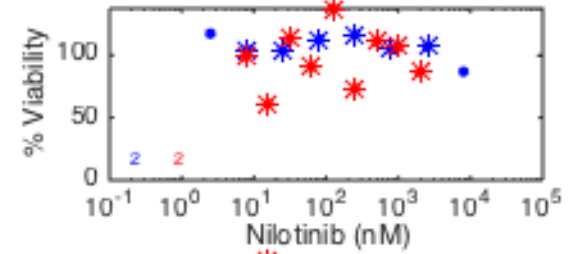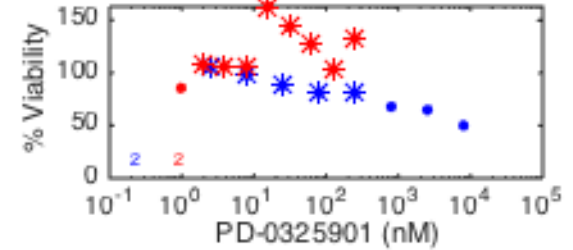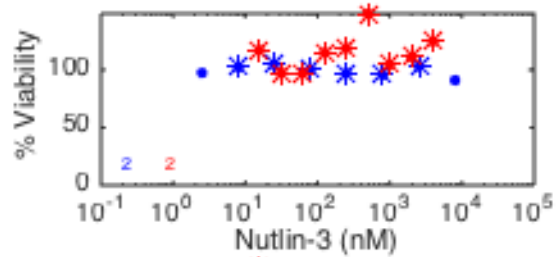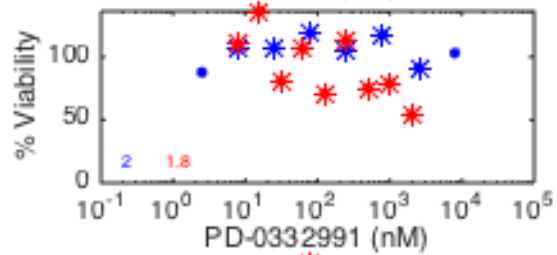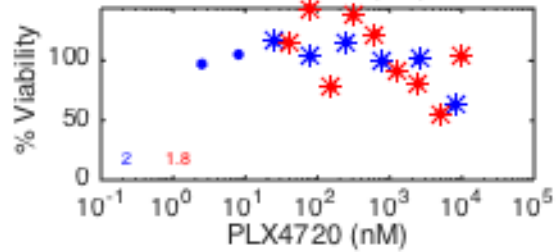

# EB2

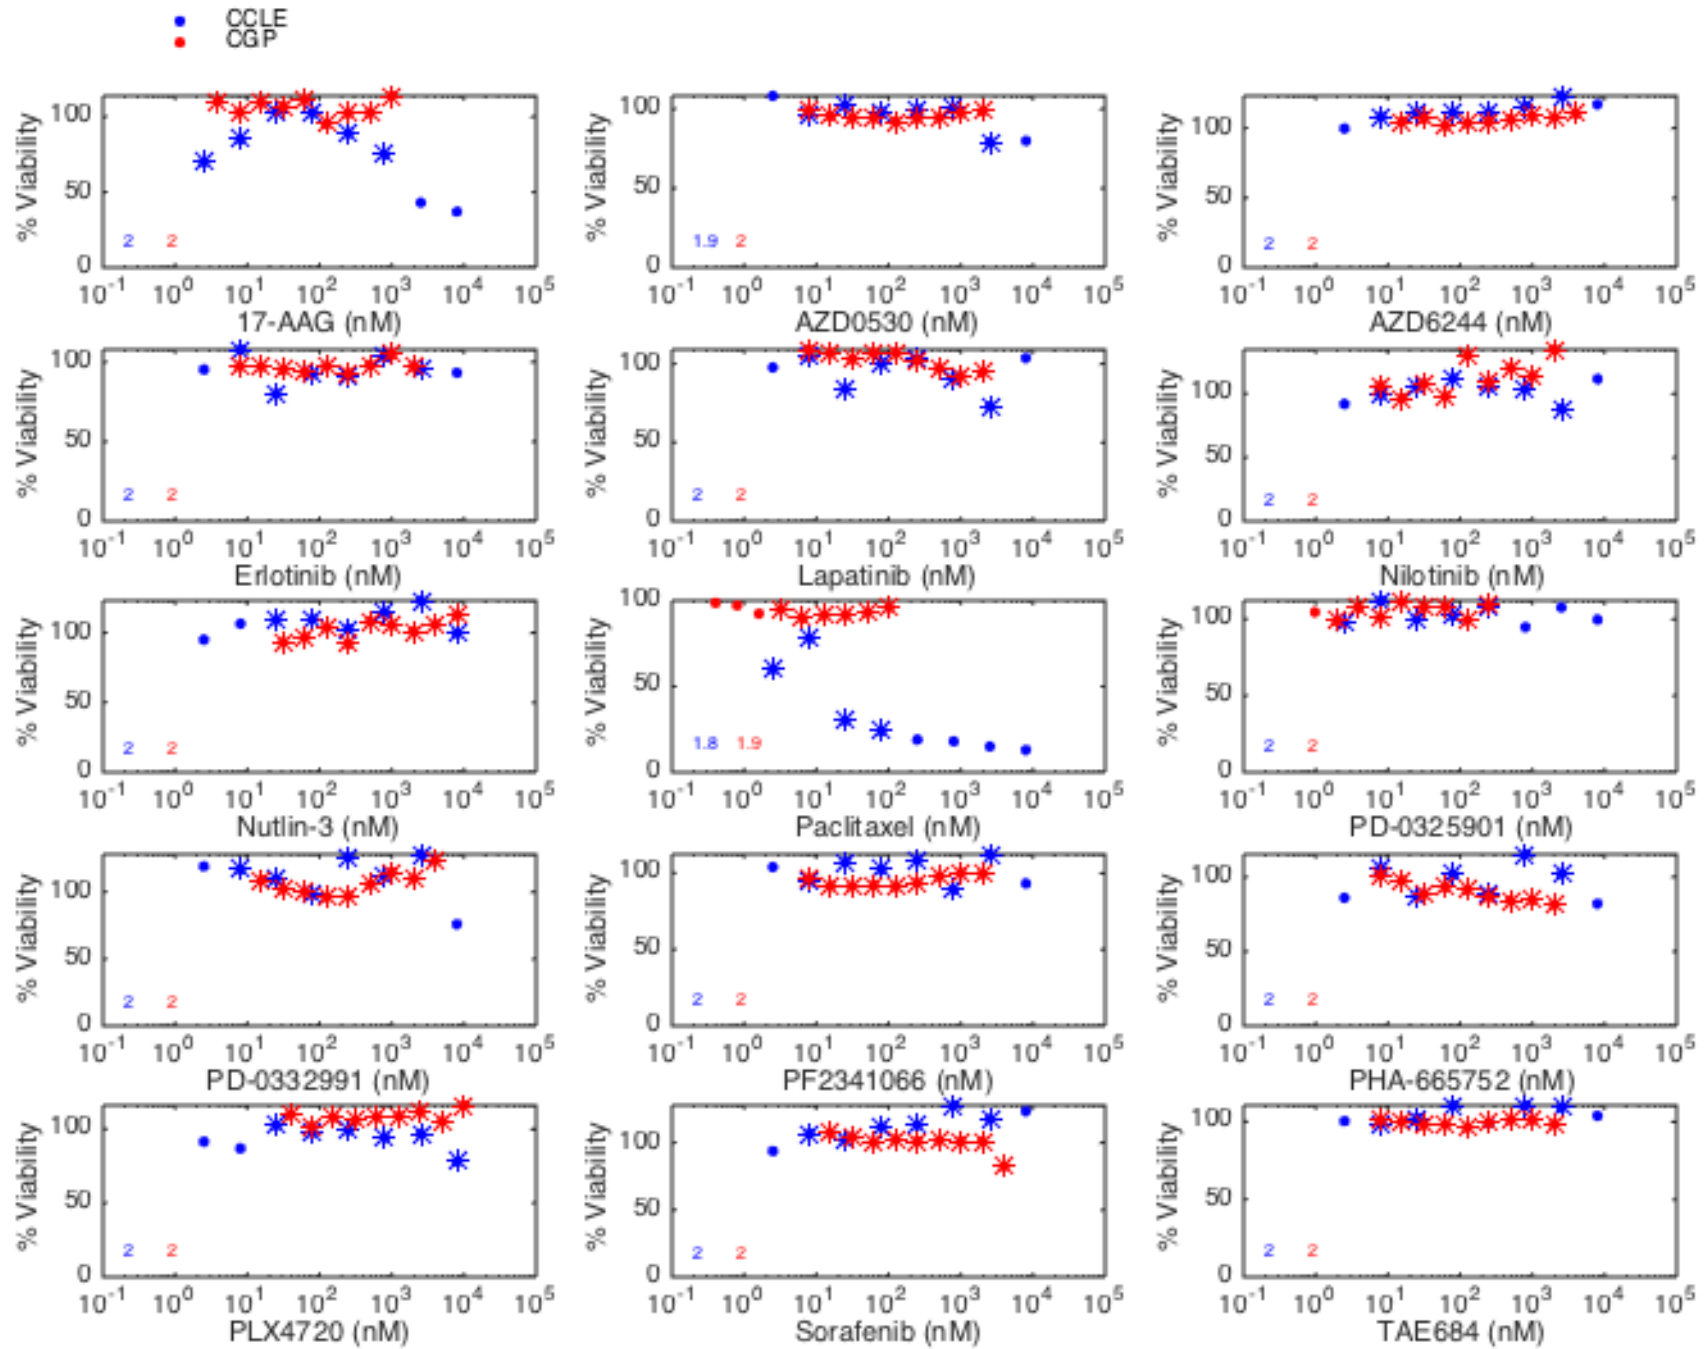

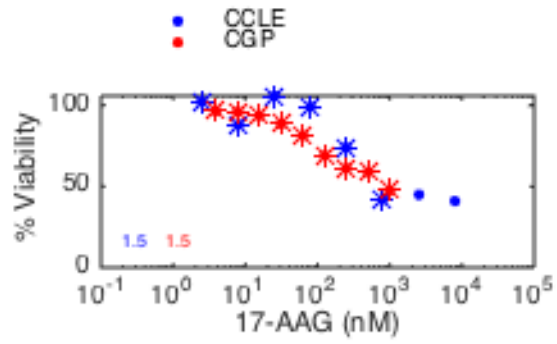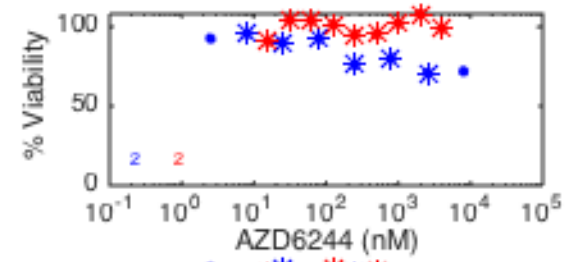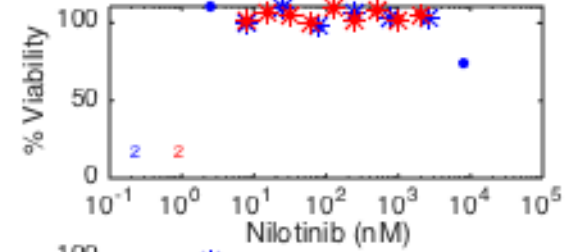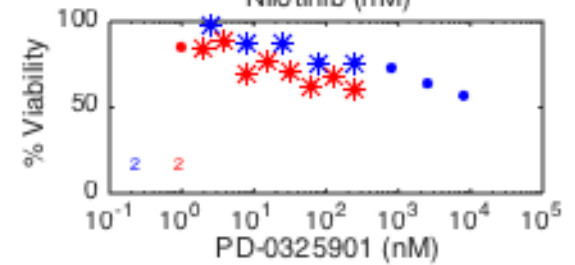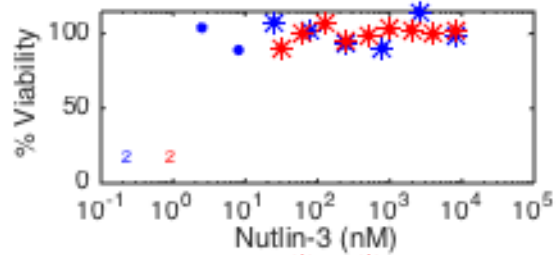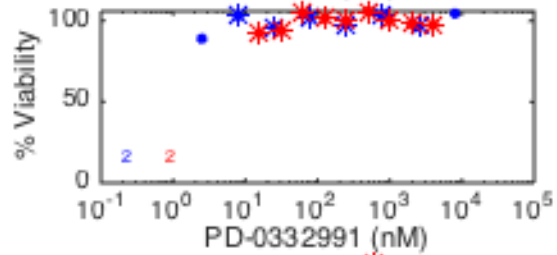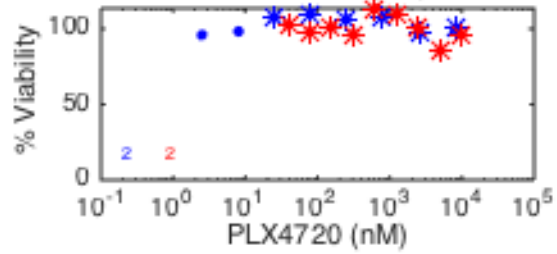

EFM-19

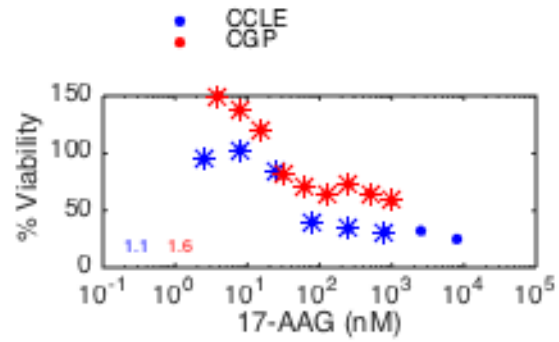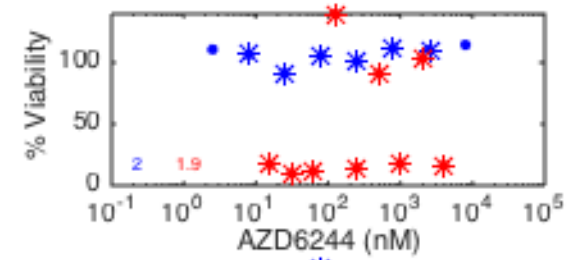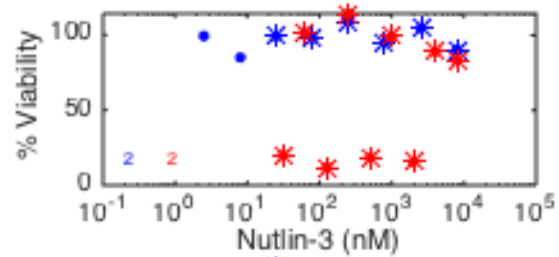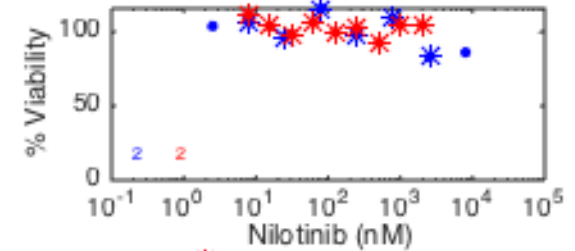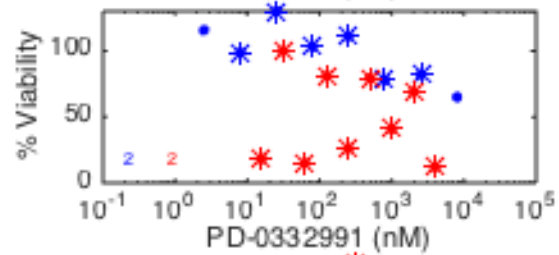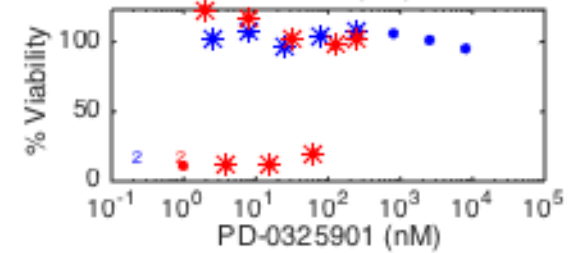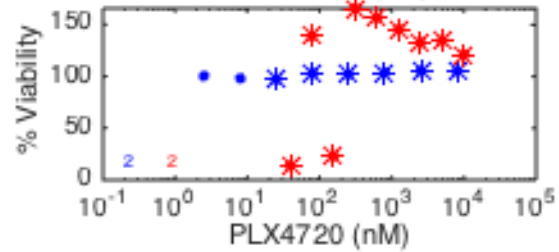

EFO-21

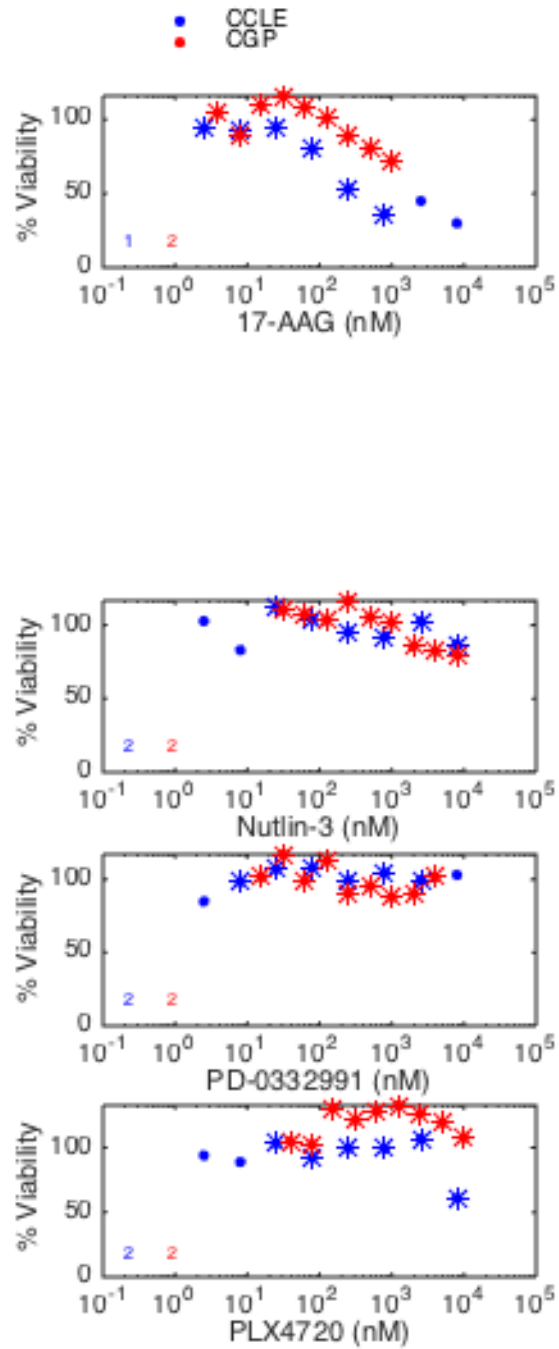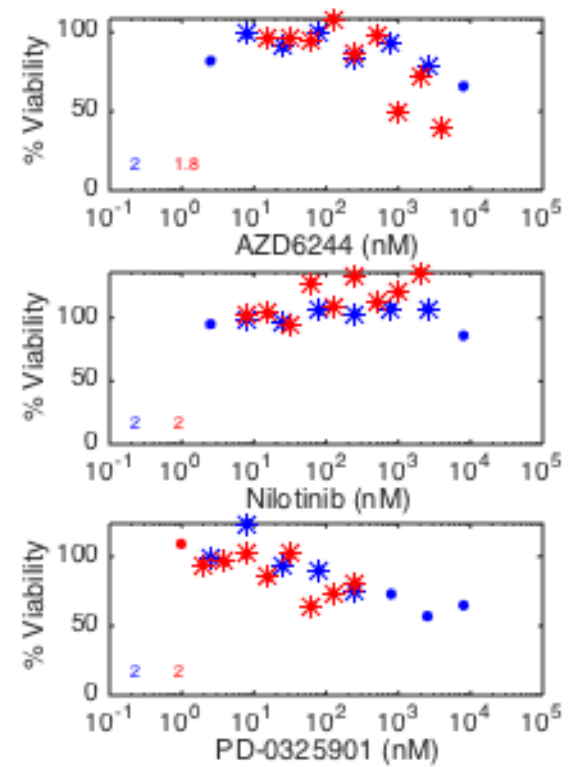

EFO-27

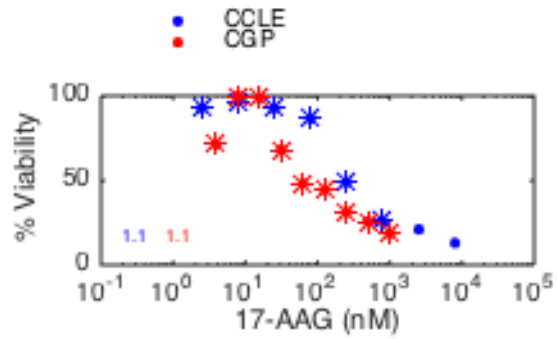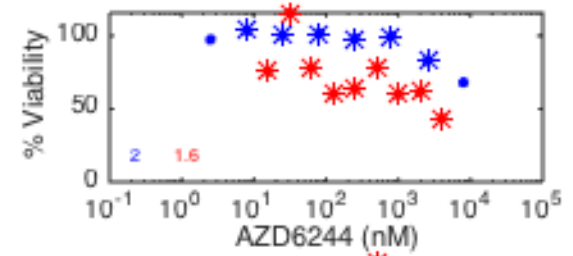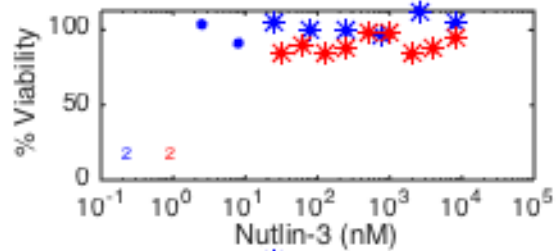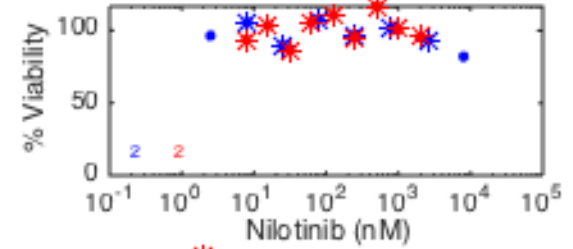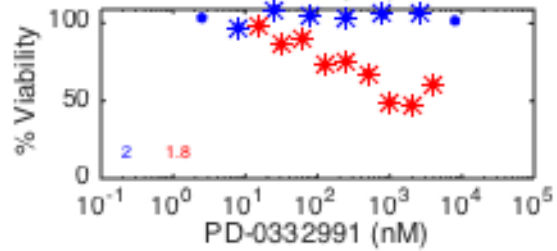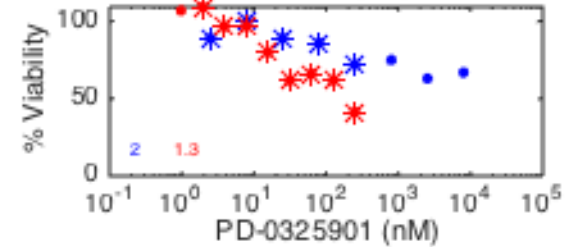



# EM-2

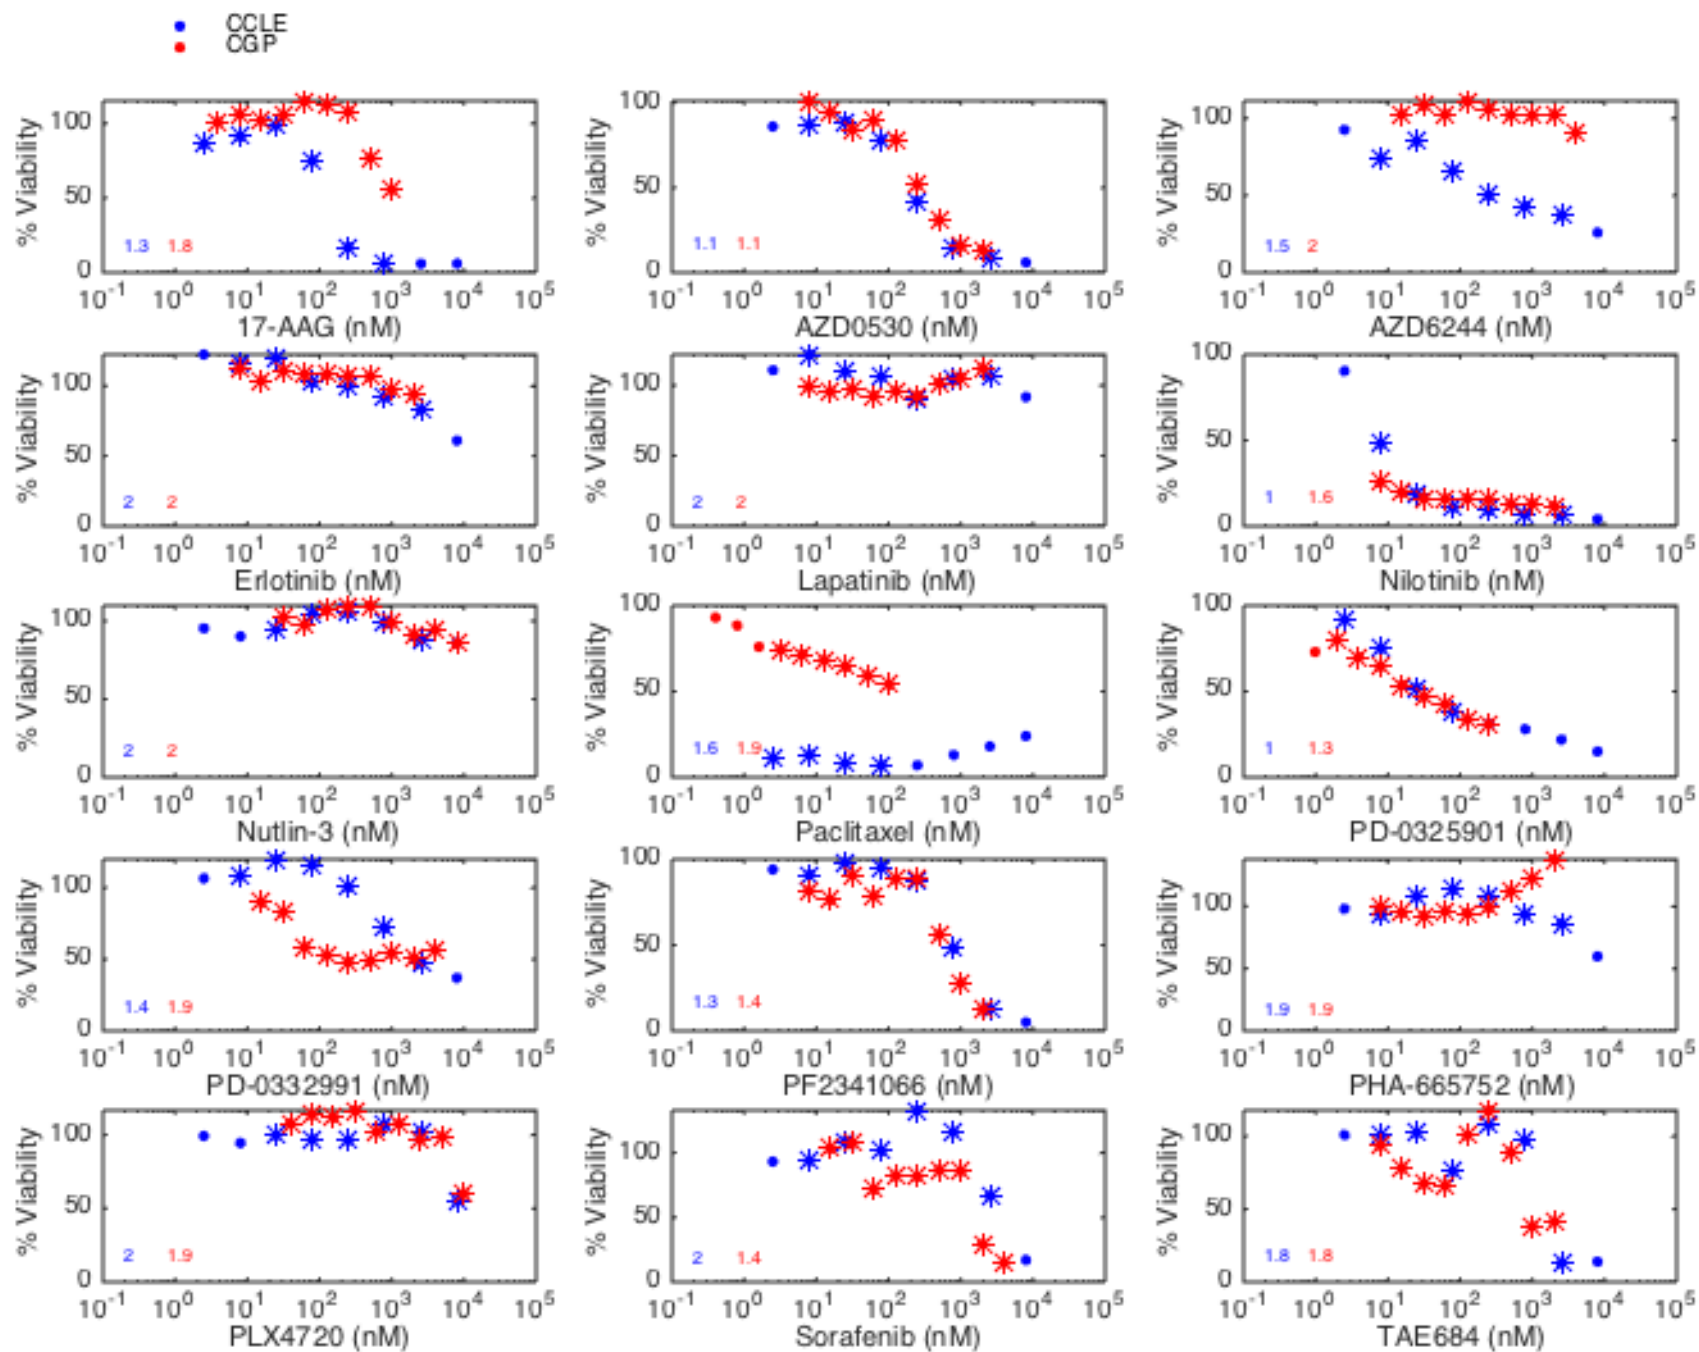

# ESS-1

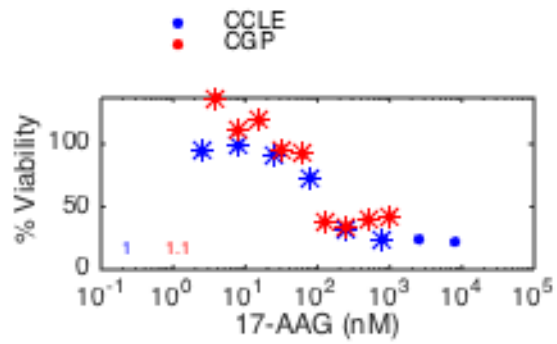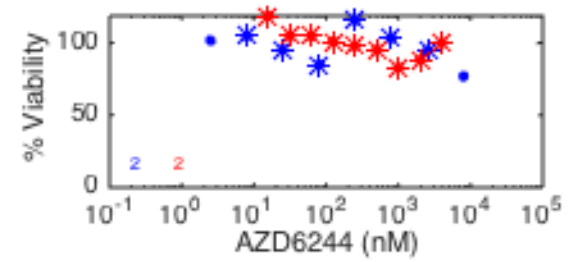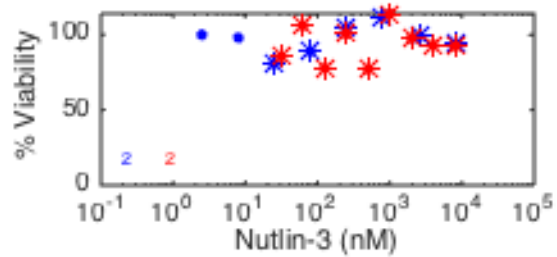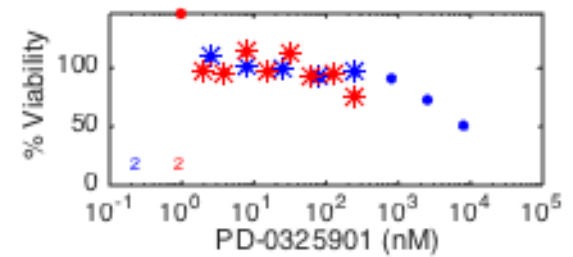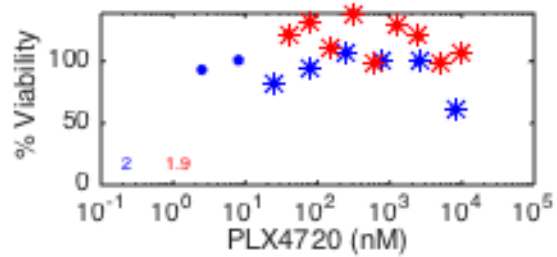

# FADU

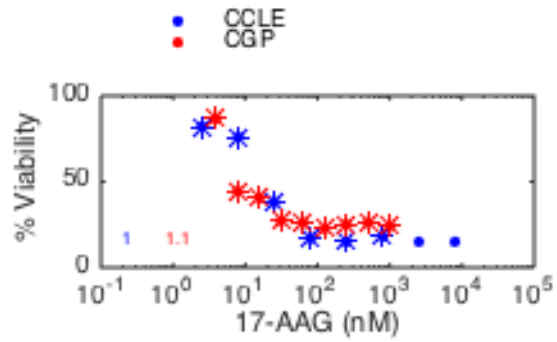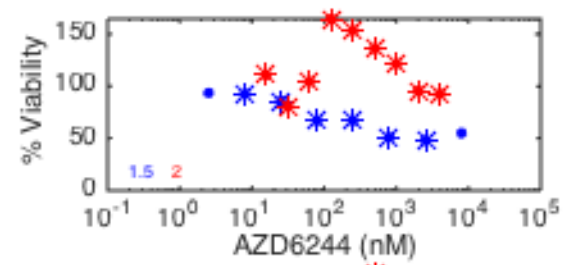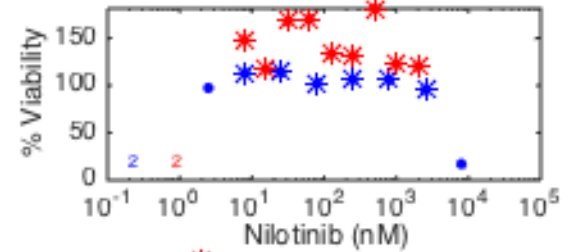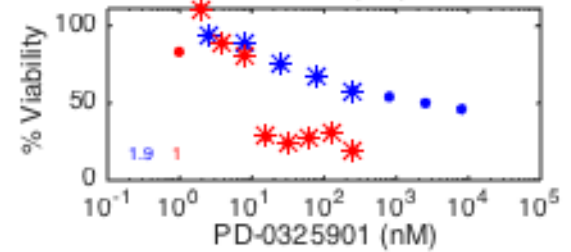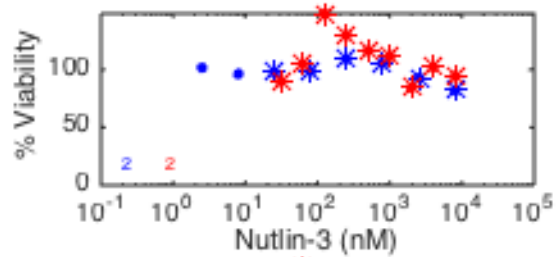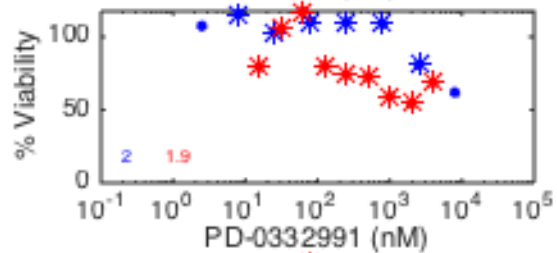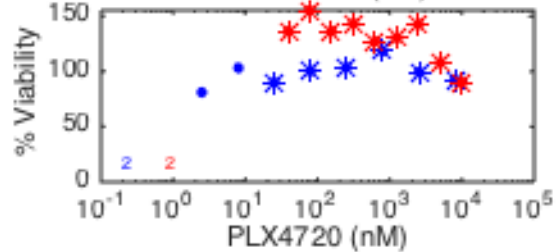

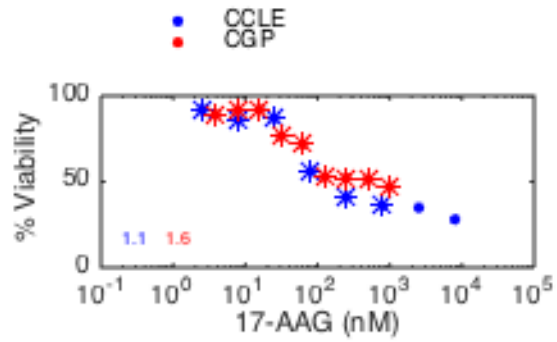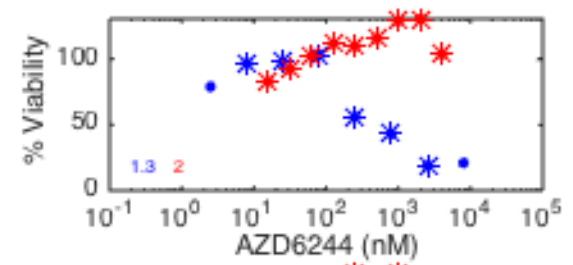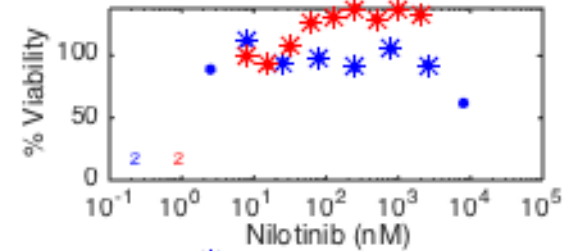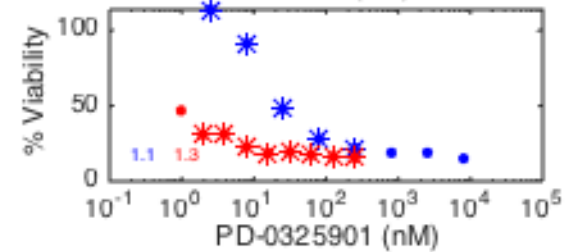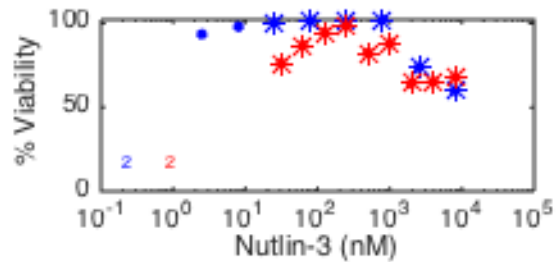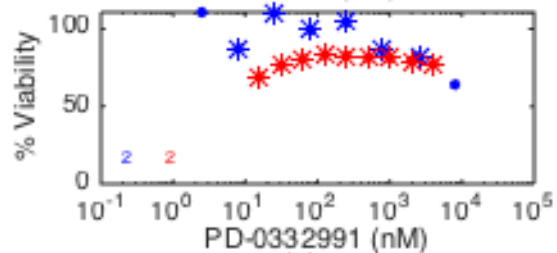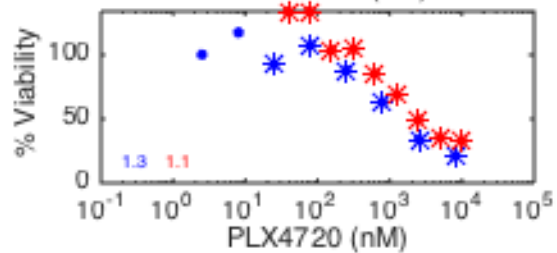

G-401

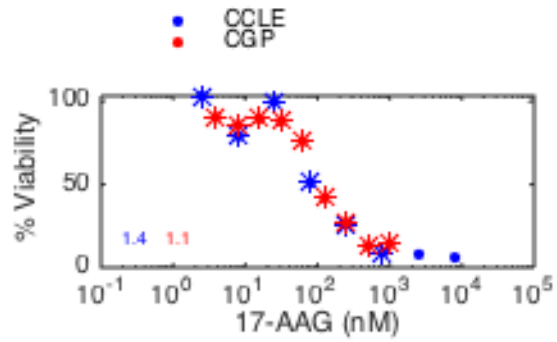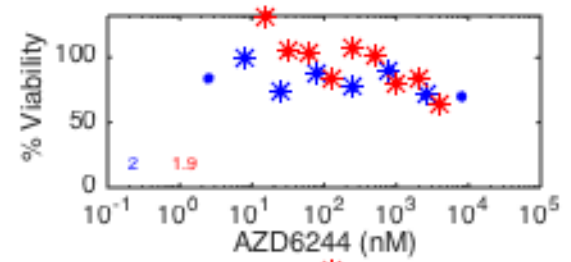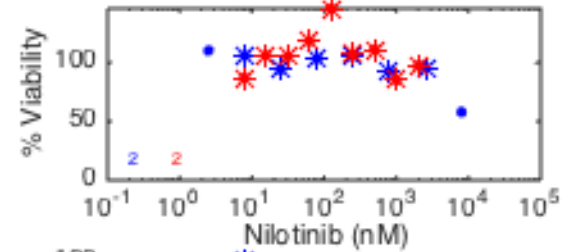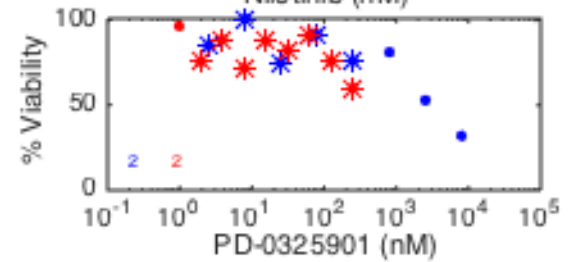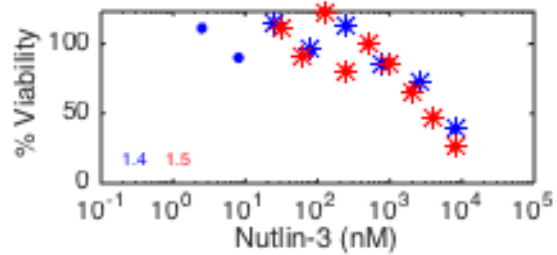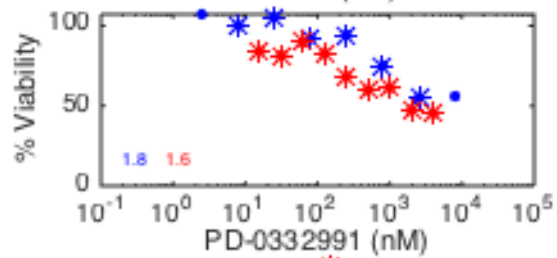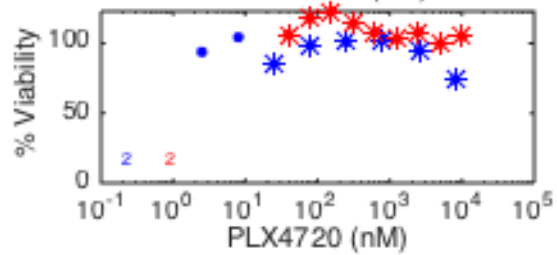

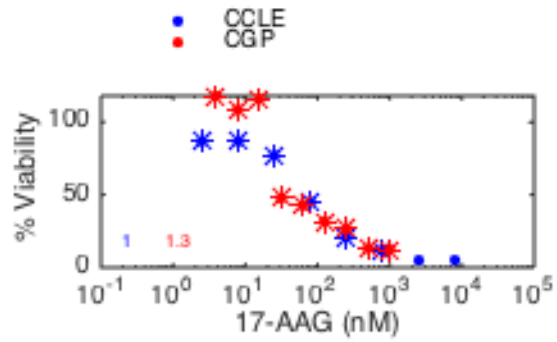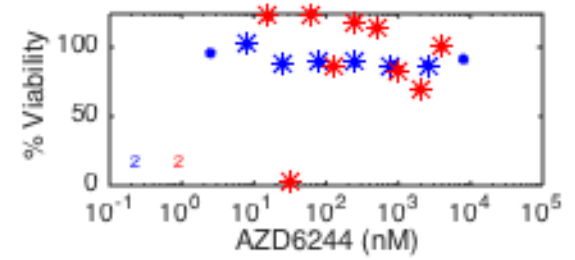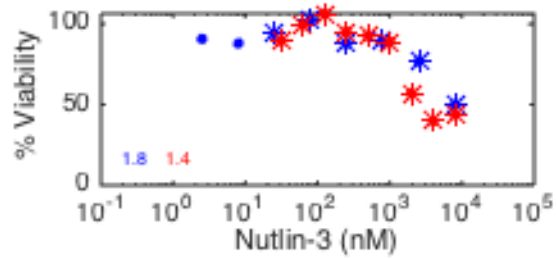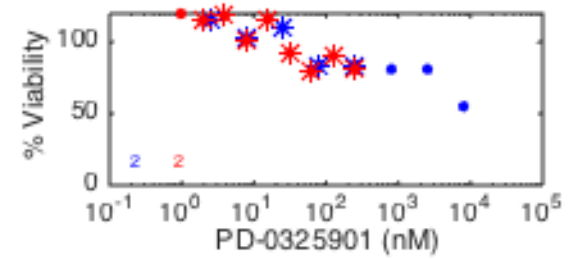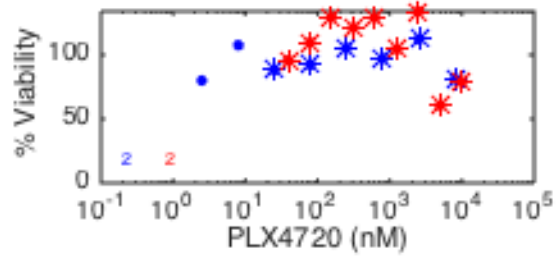

GAMG

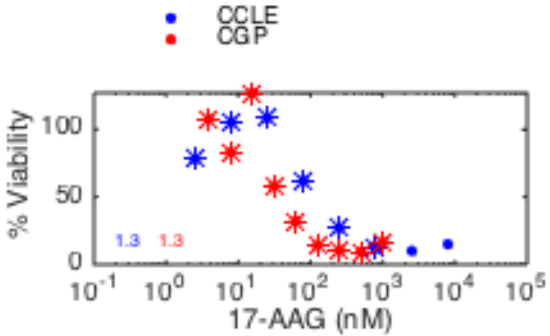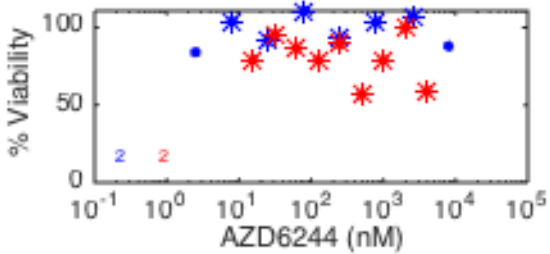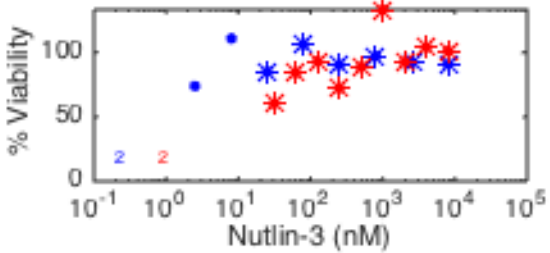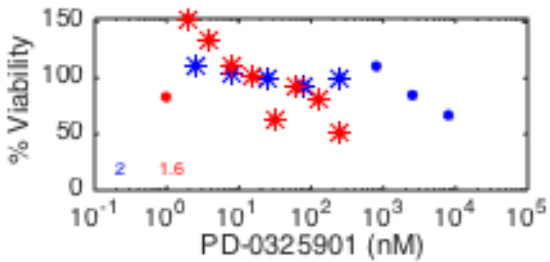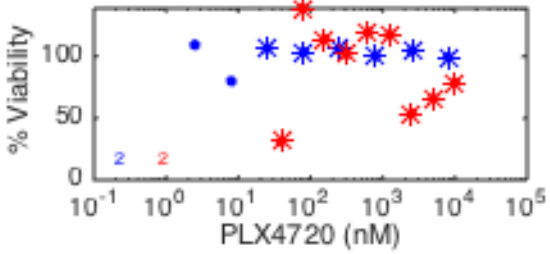

# GB-1

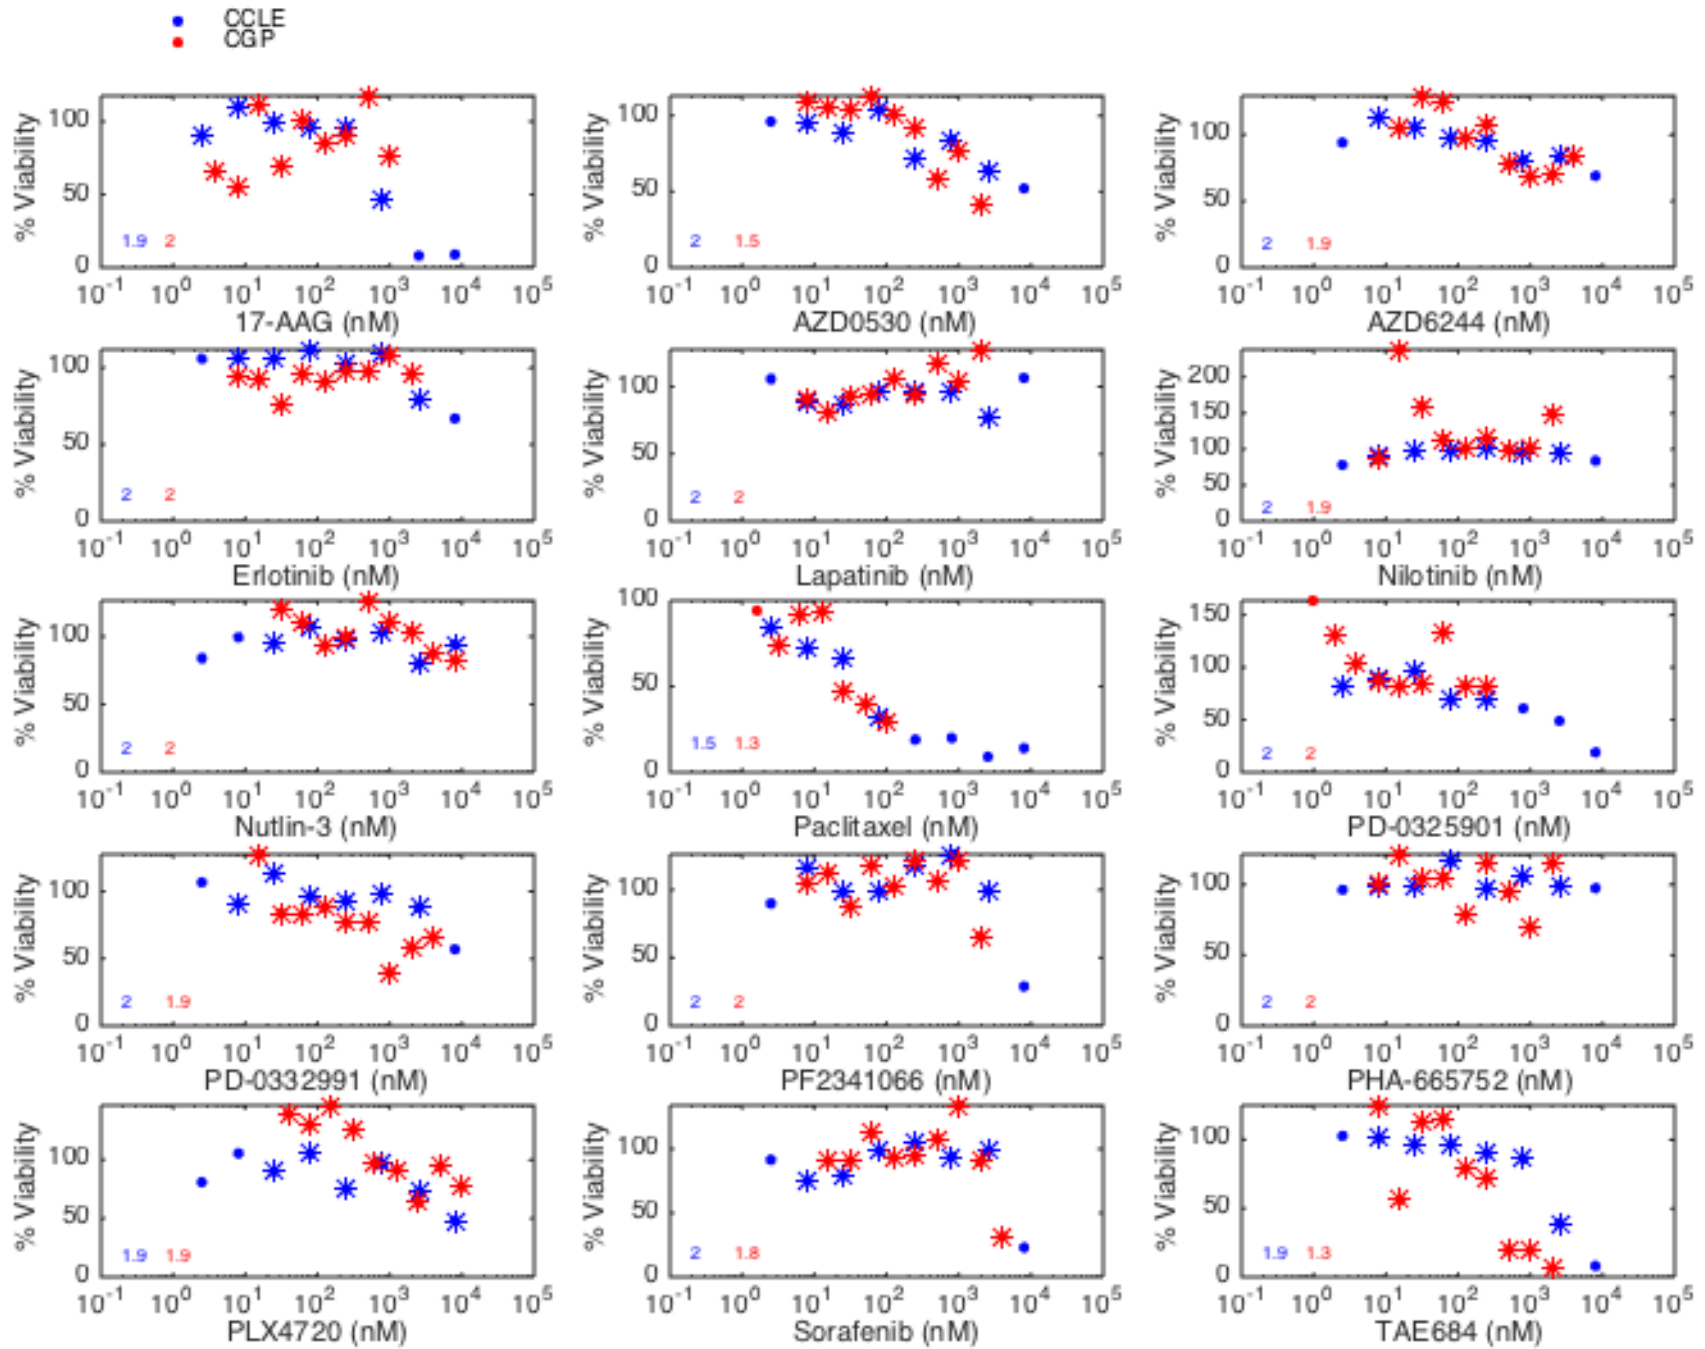



# GCIY

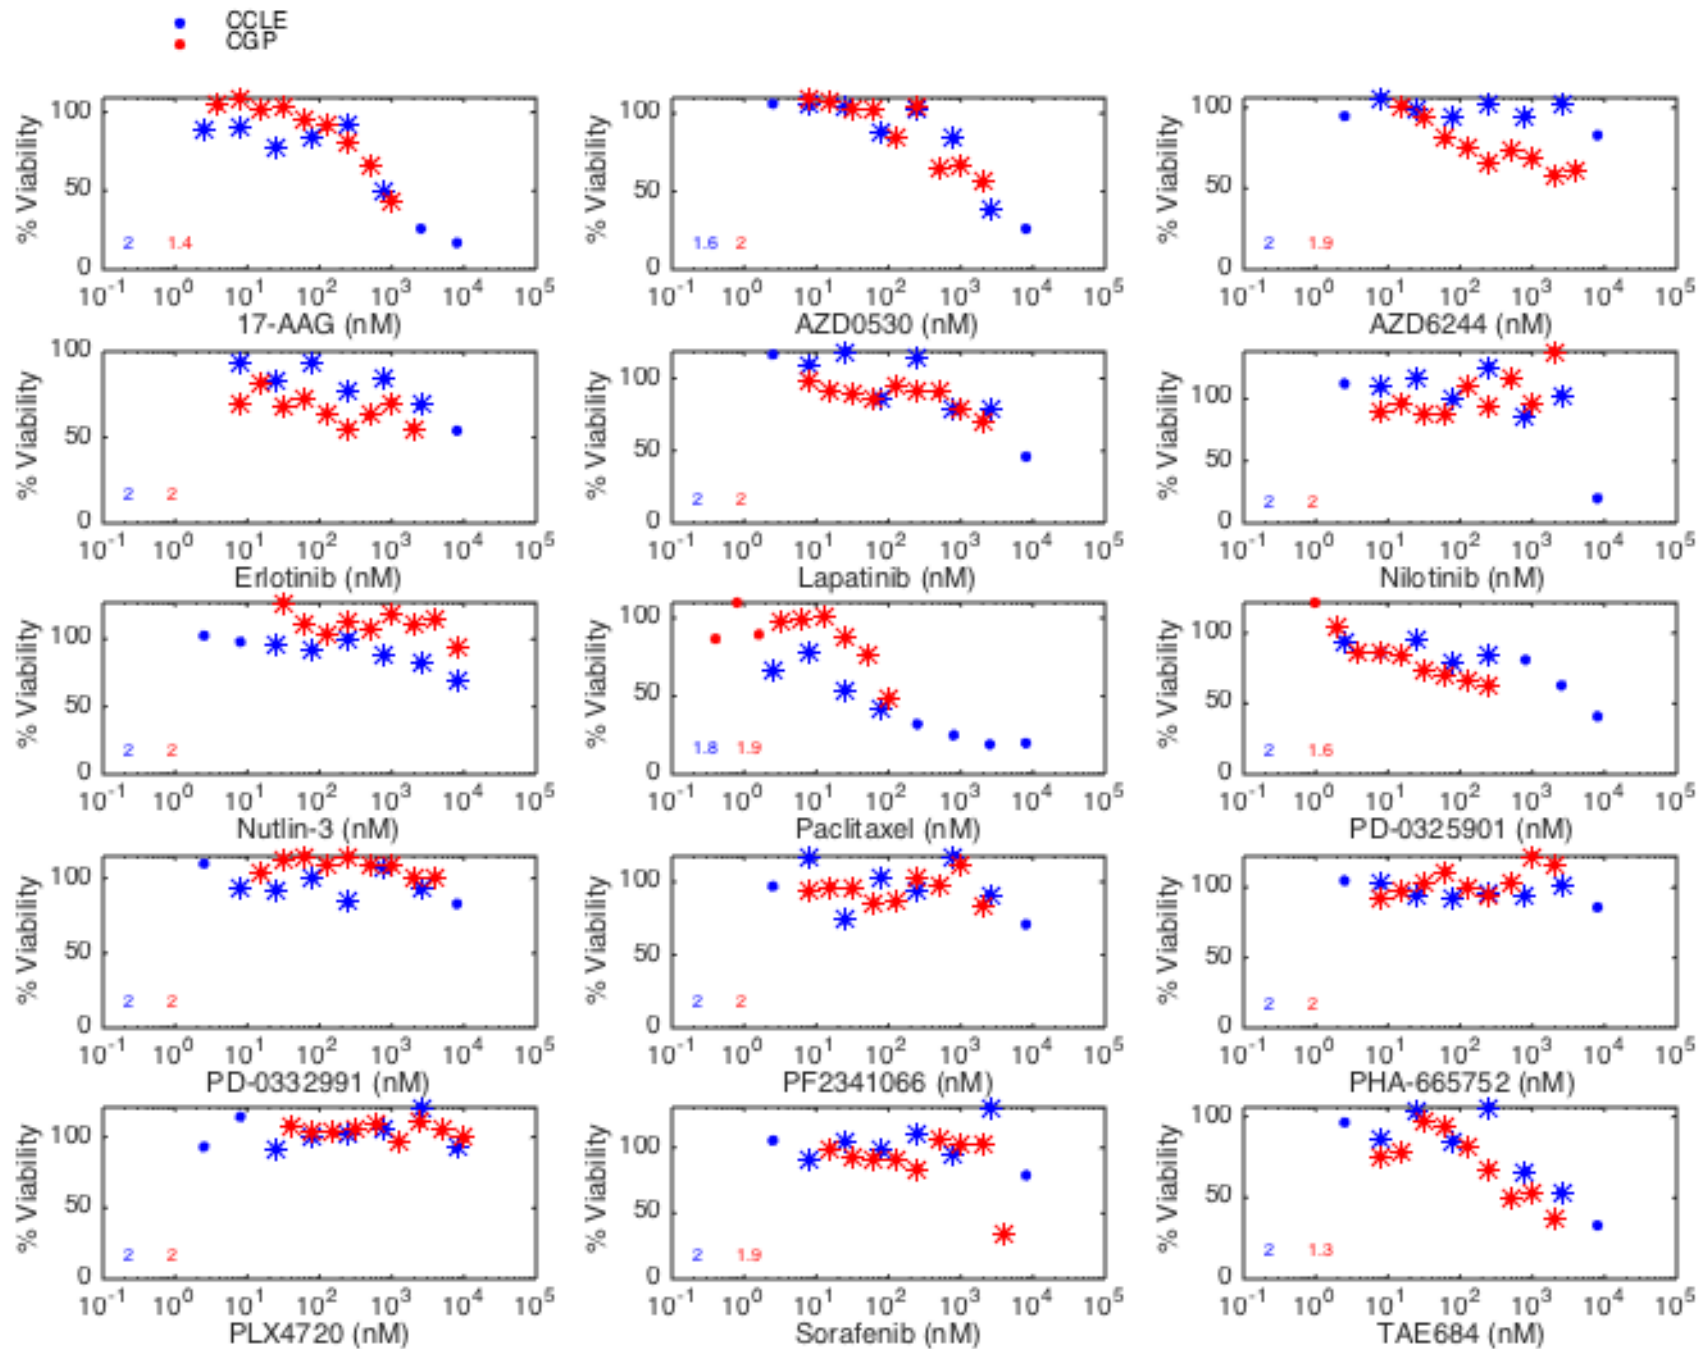

# GCT

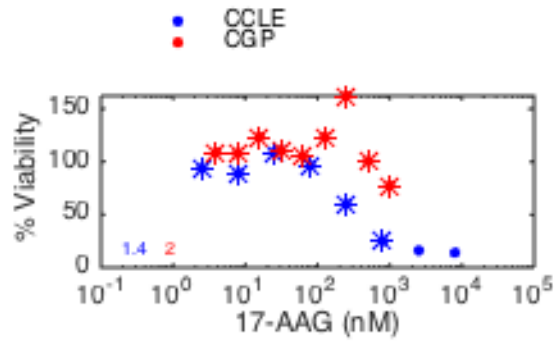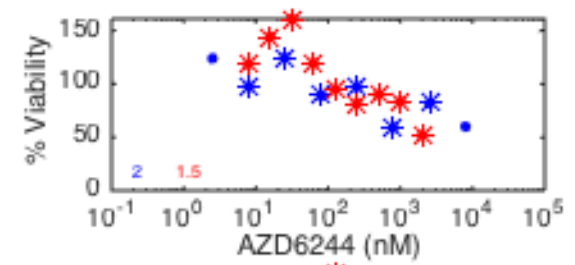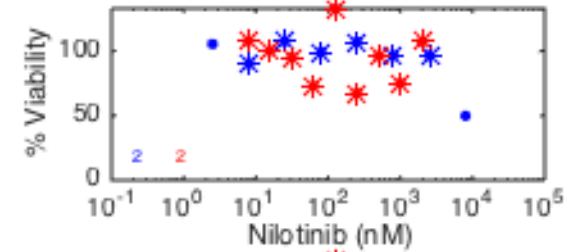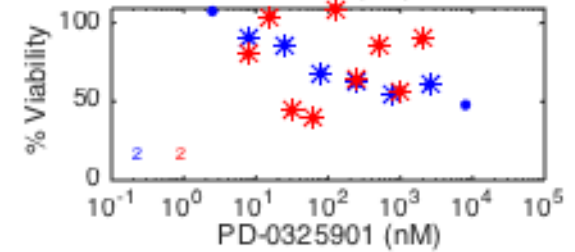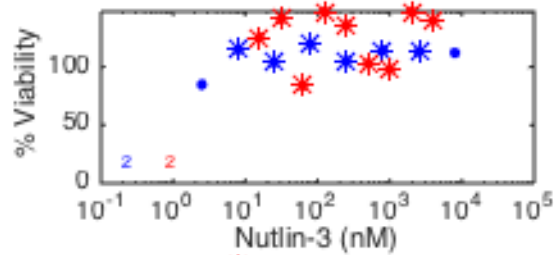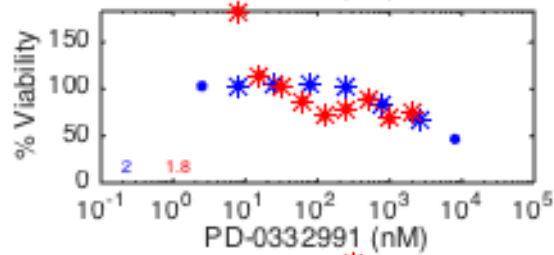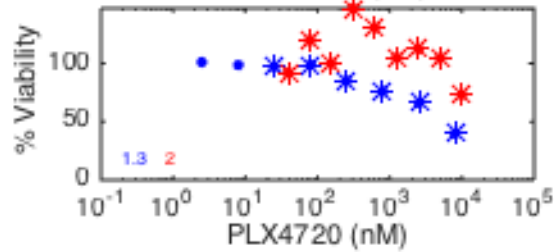

# GI-1

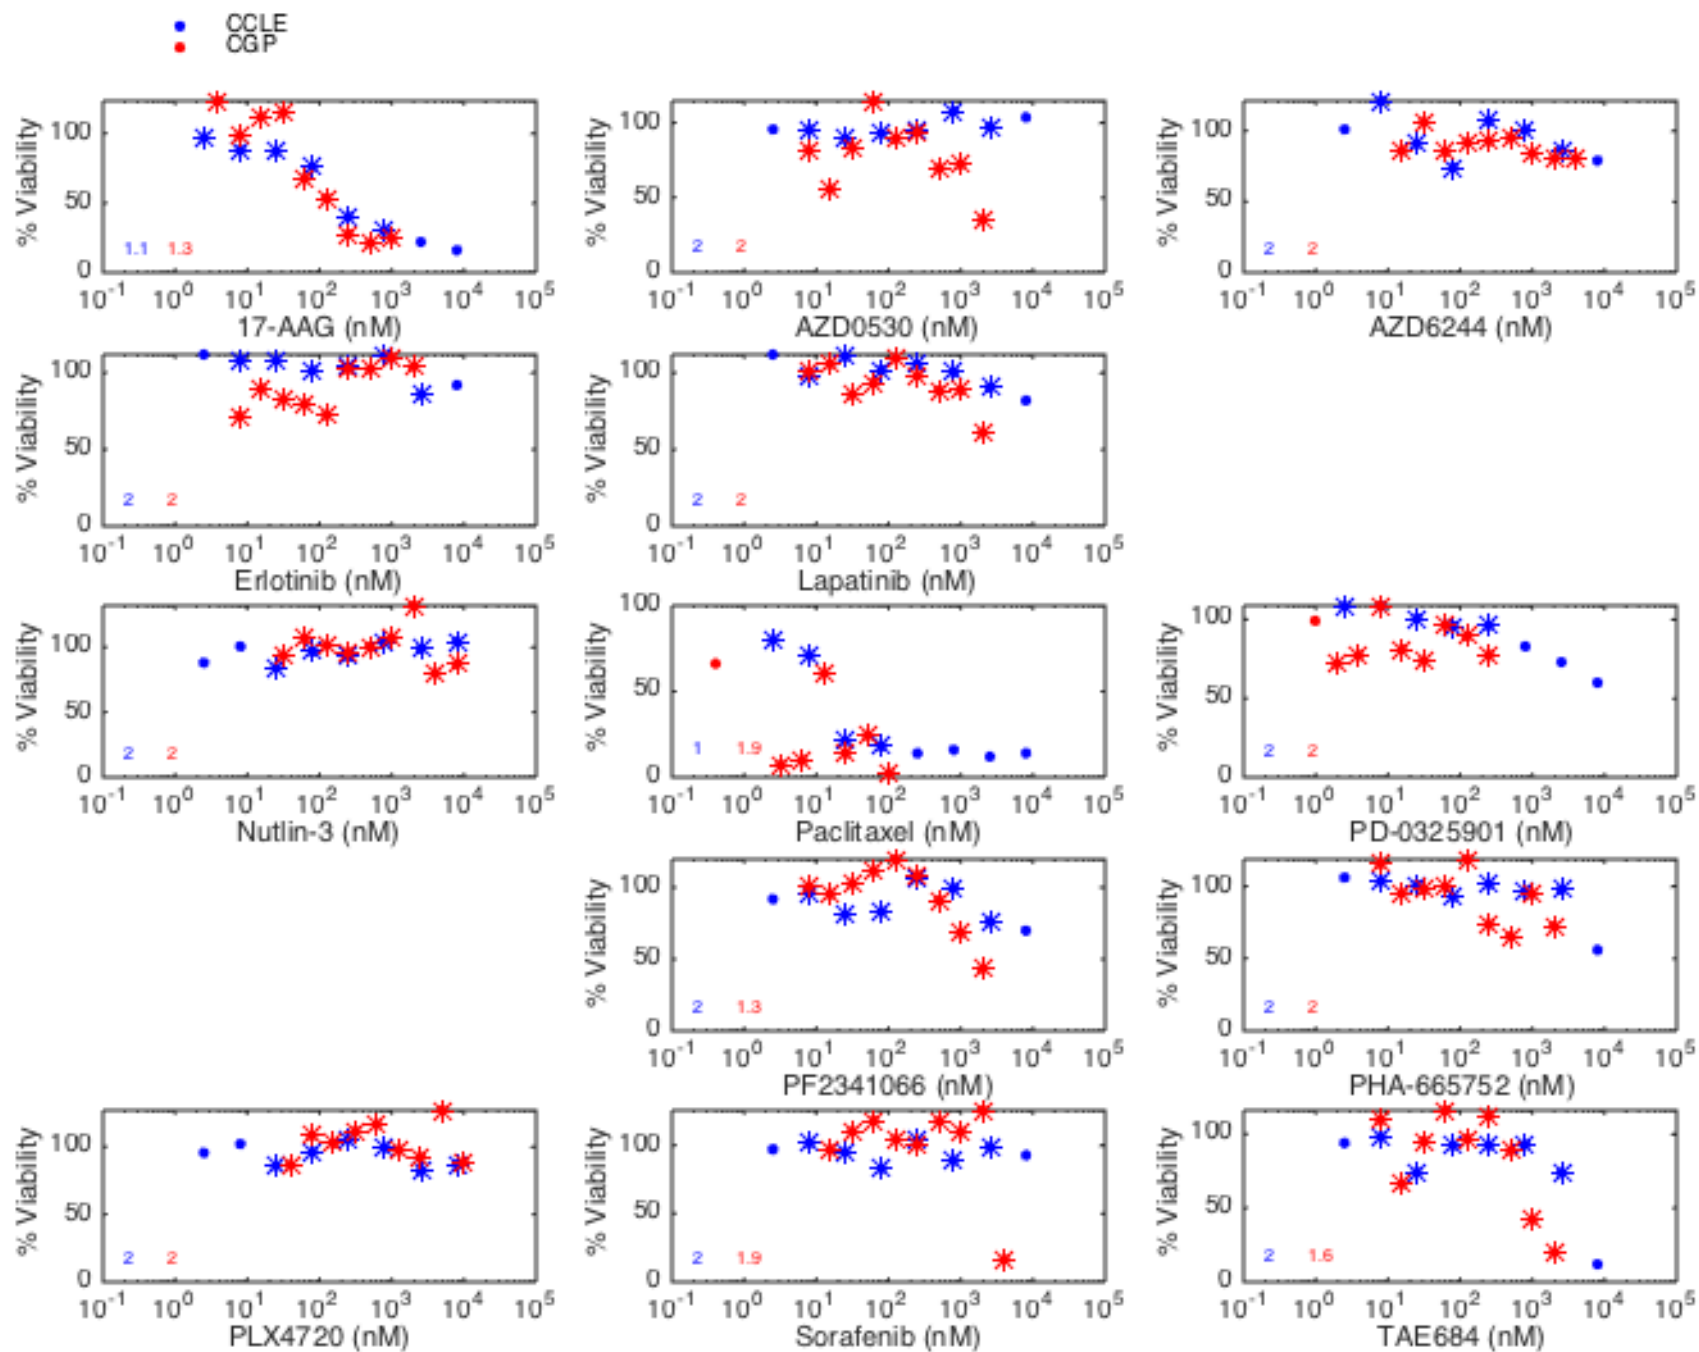

GMS-10

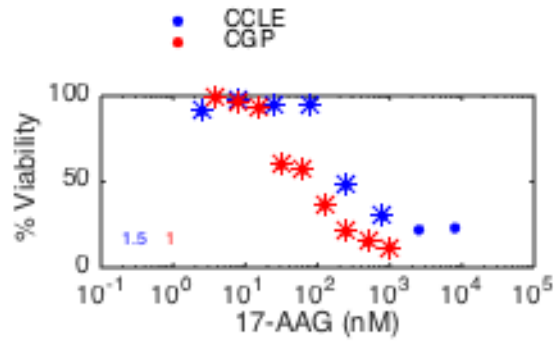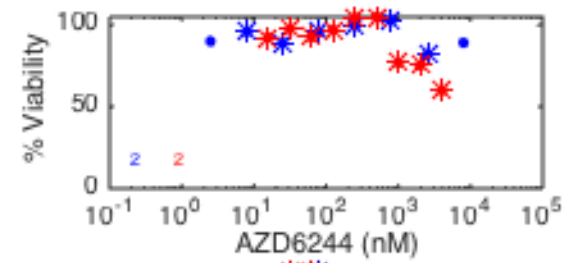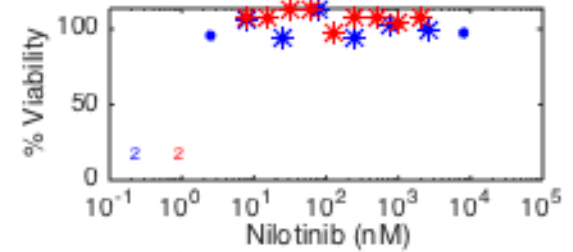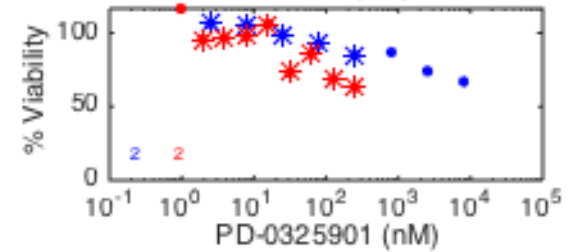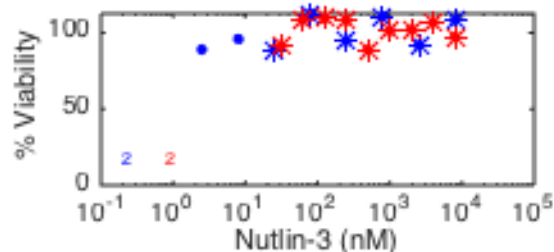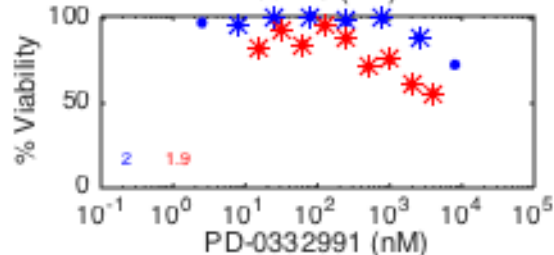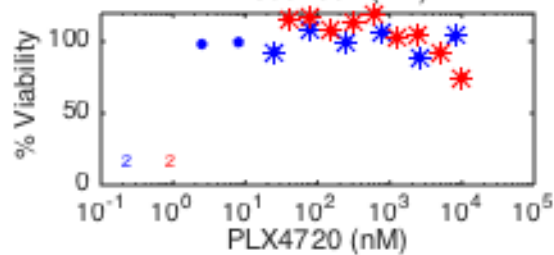

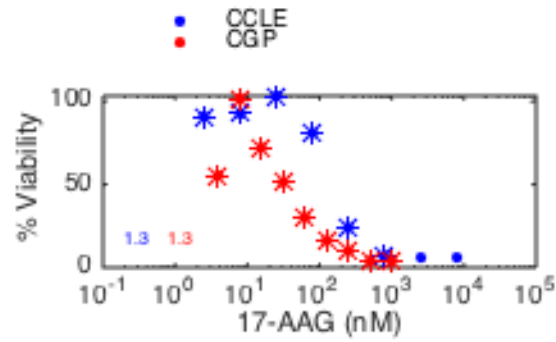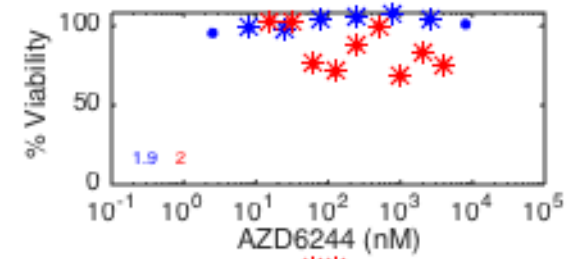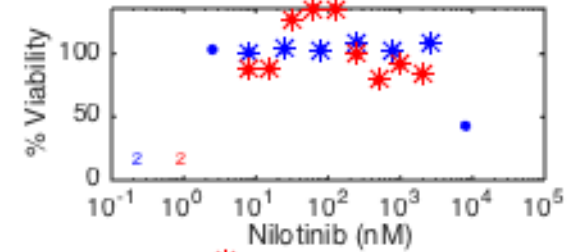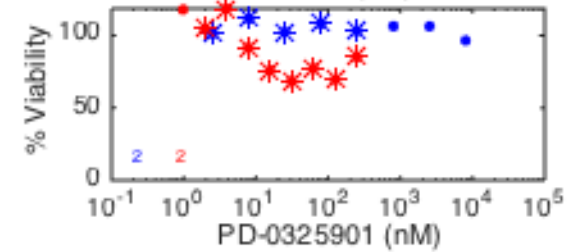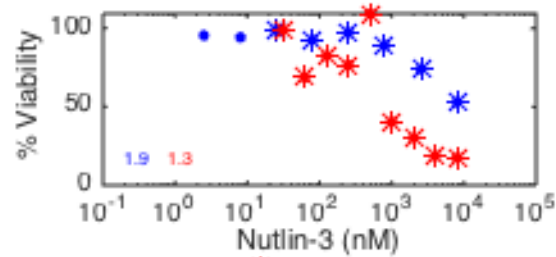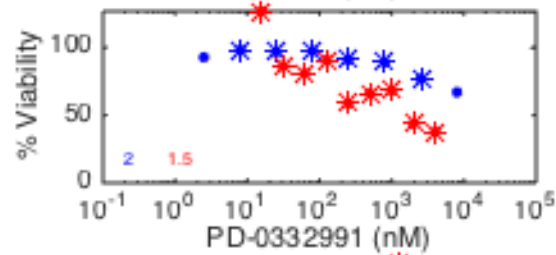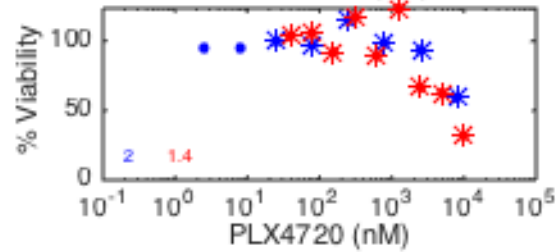

# HCC70

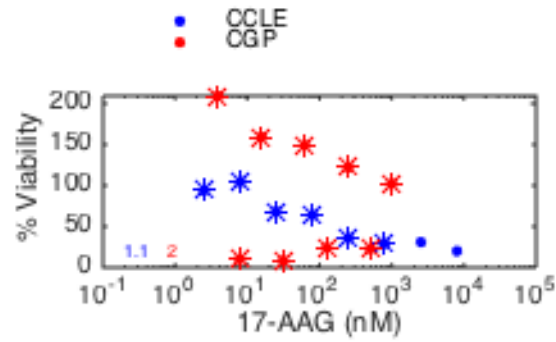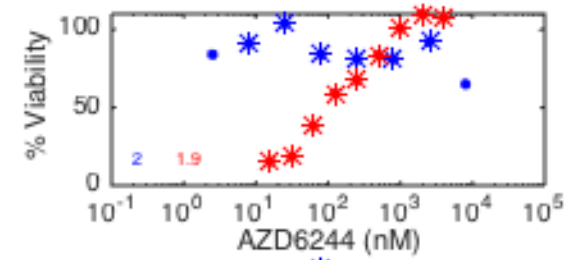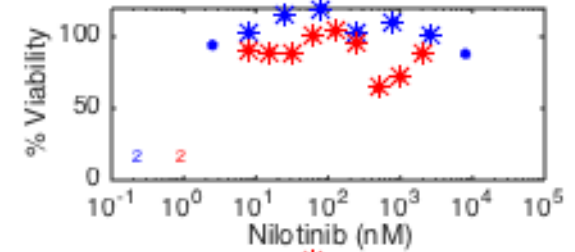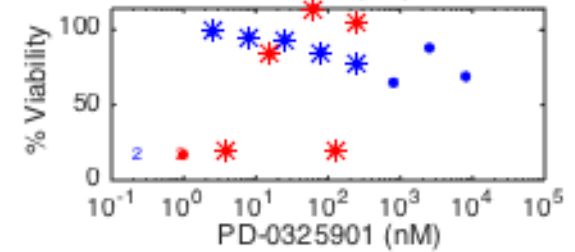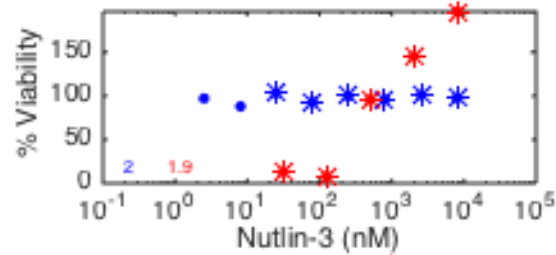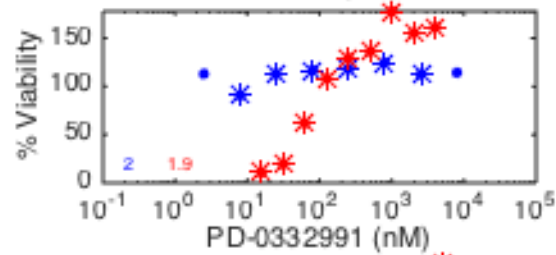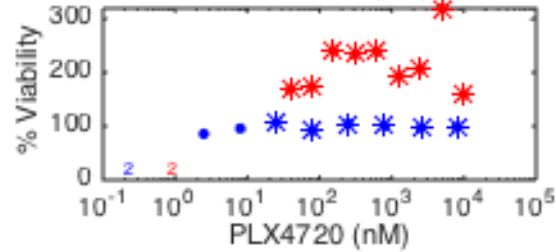

# HCC1187

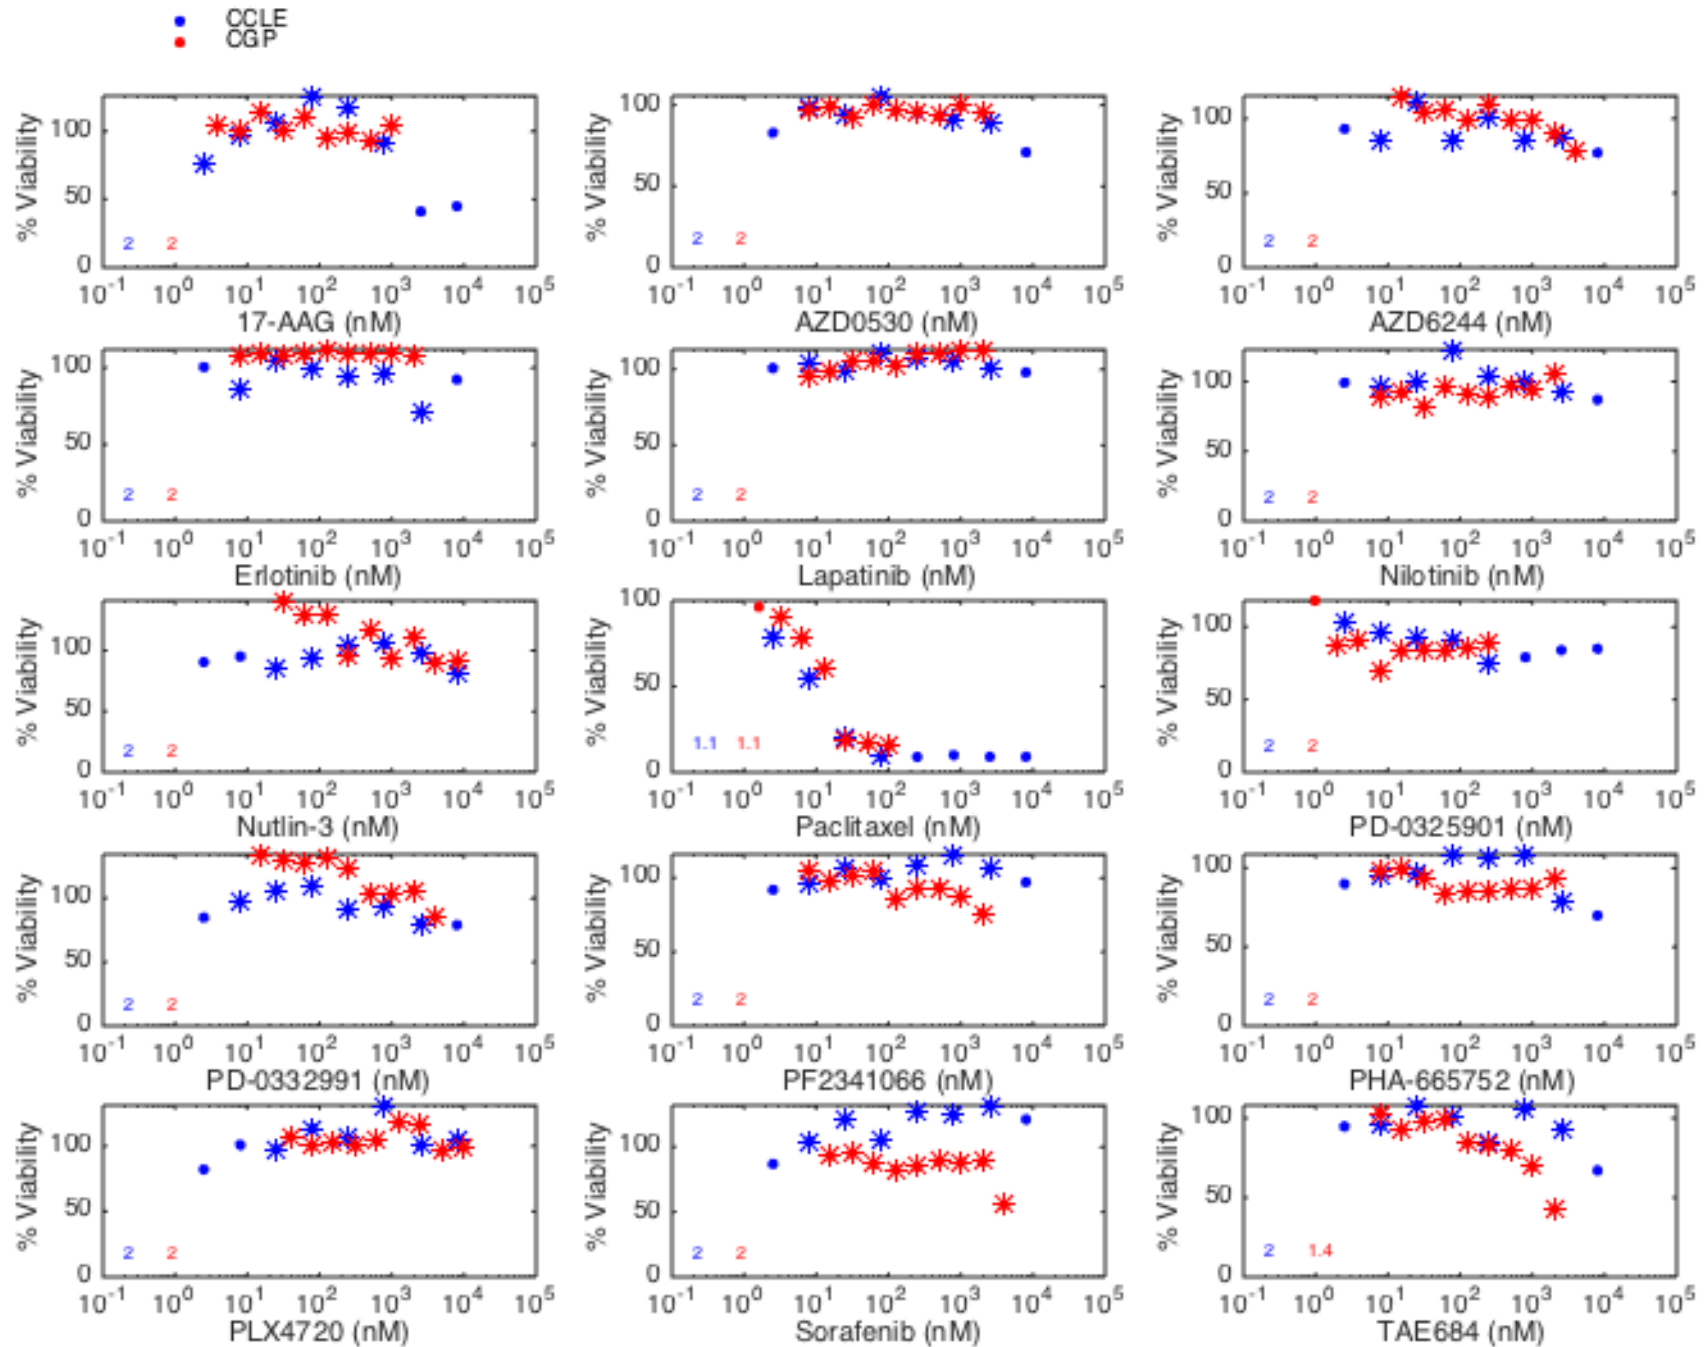

# HCC1395

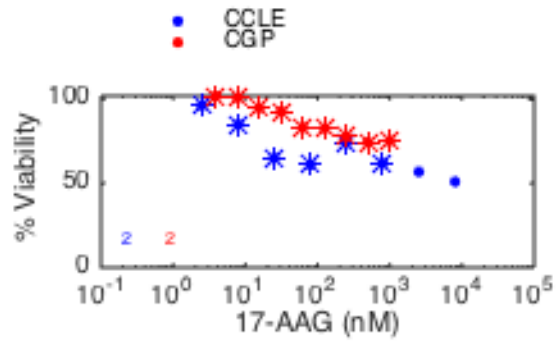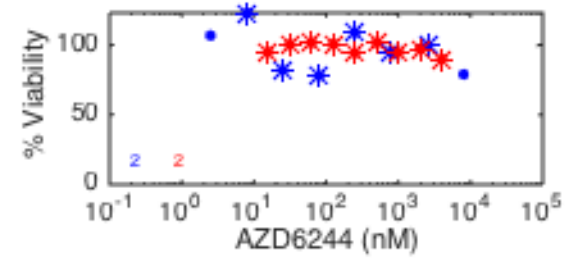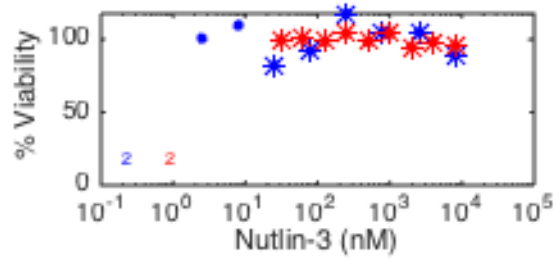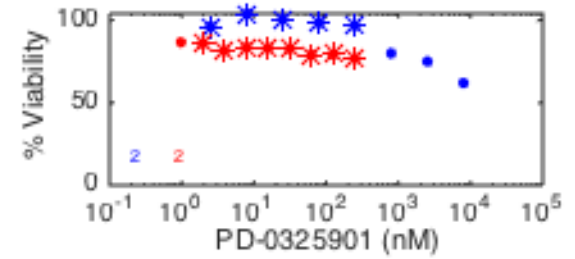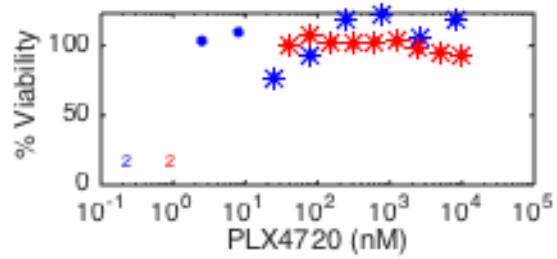



# HCC1569

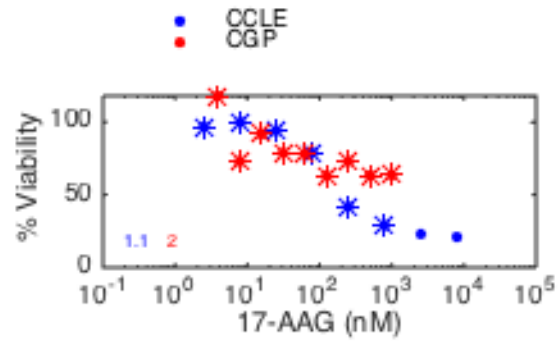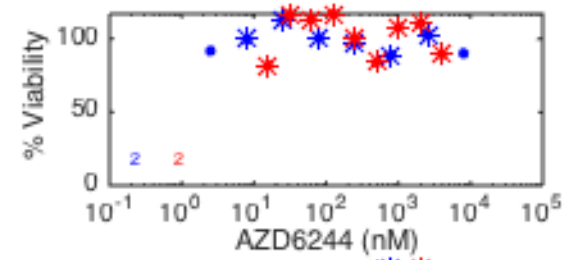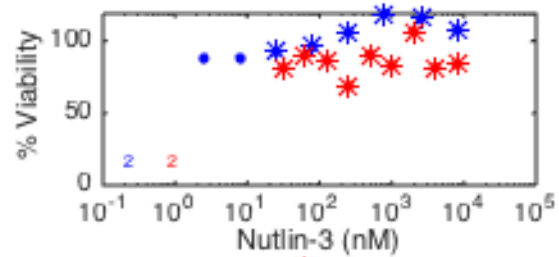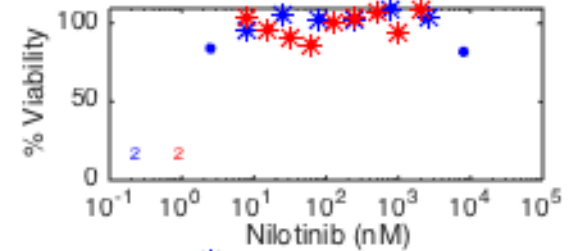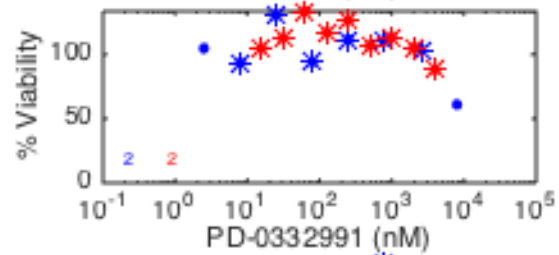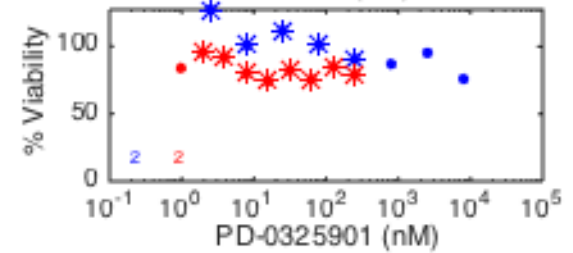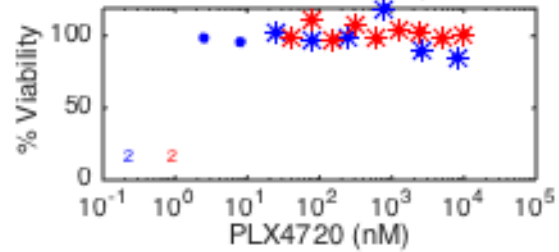

# HCC1806

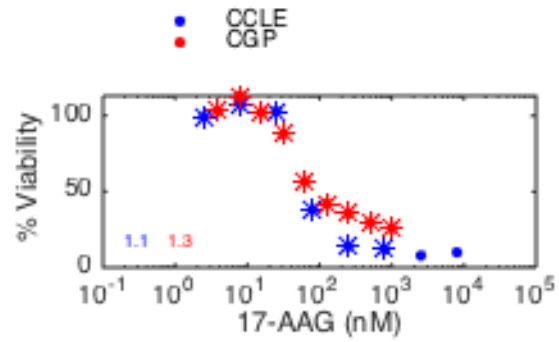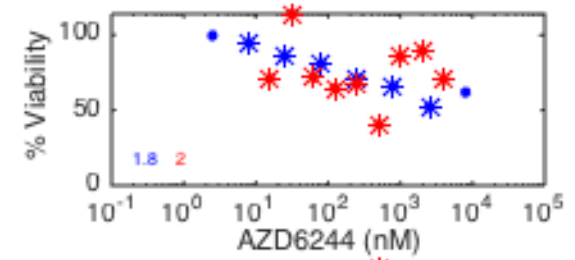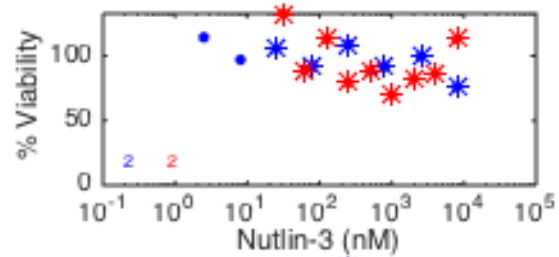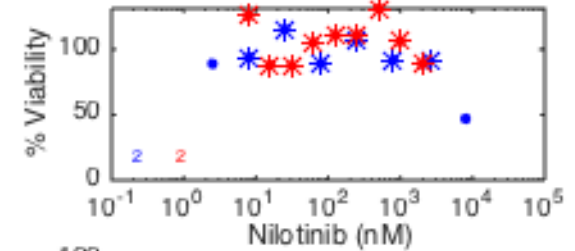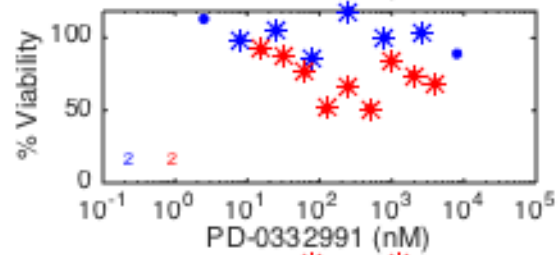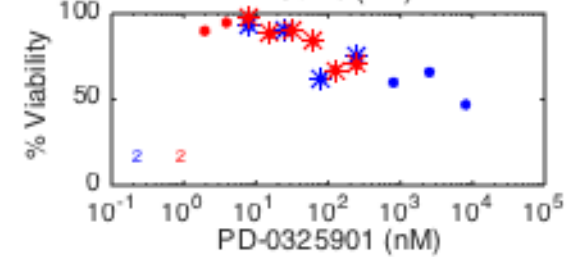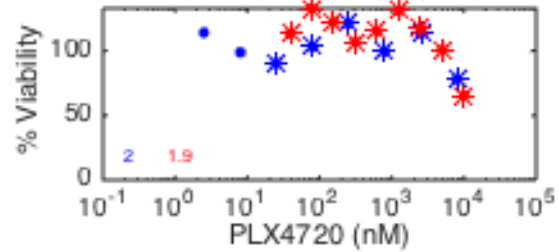

# HCC1954

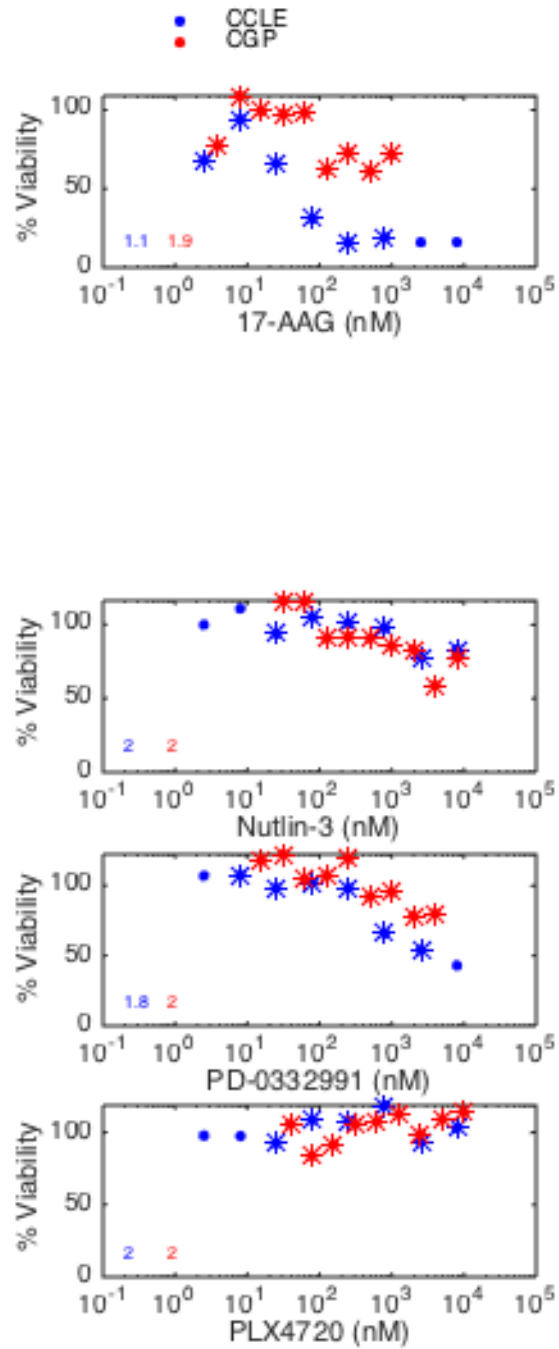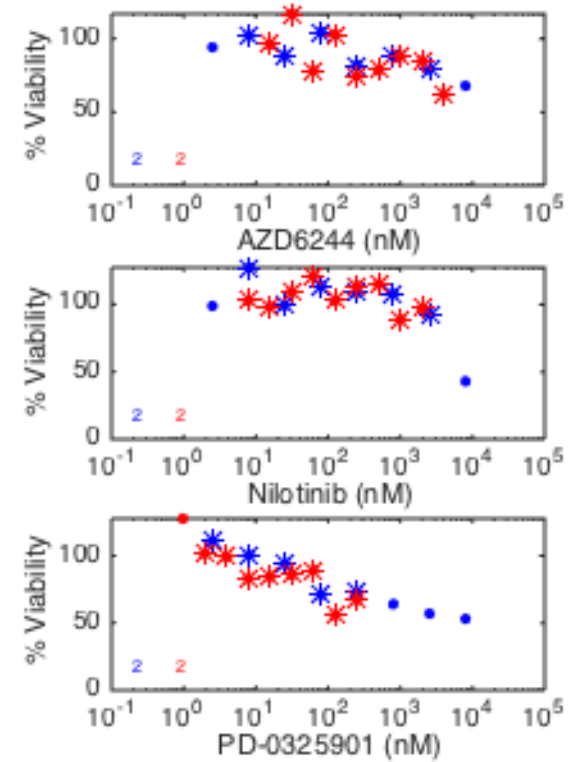

# HCT-15

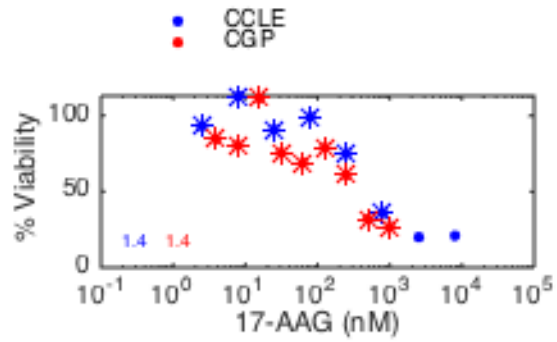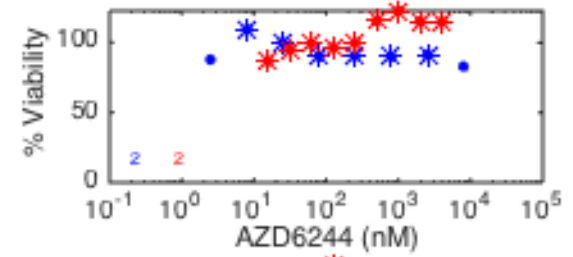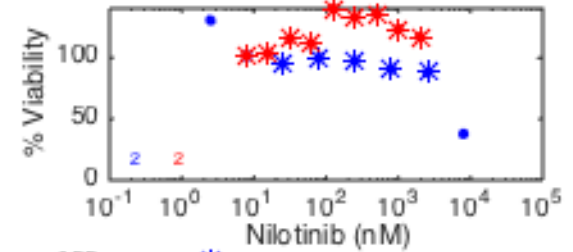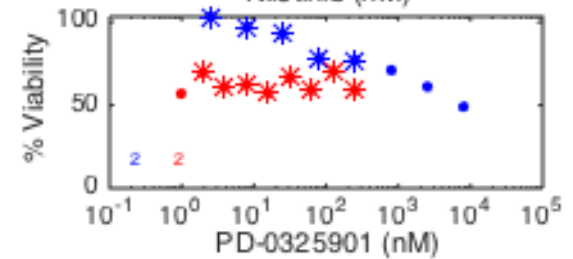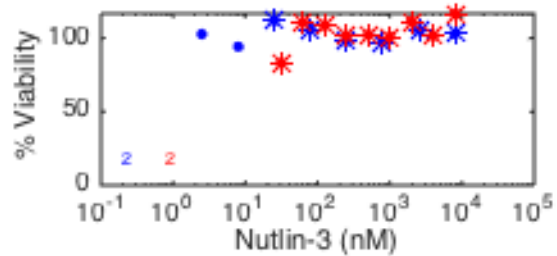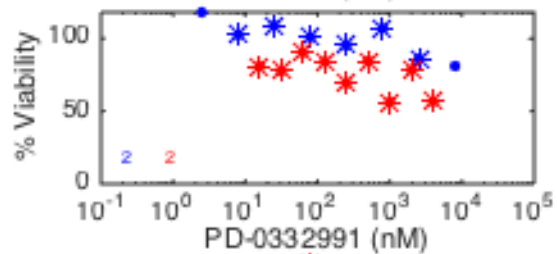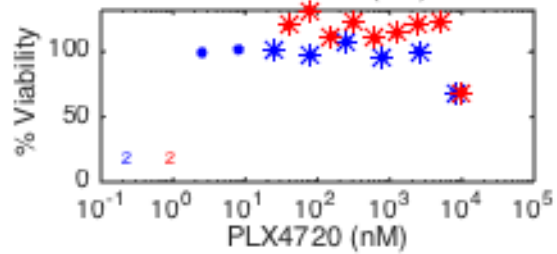

# HCT-116

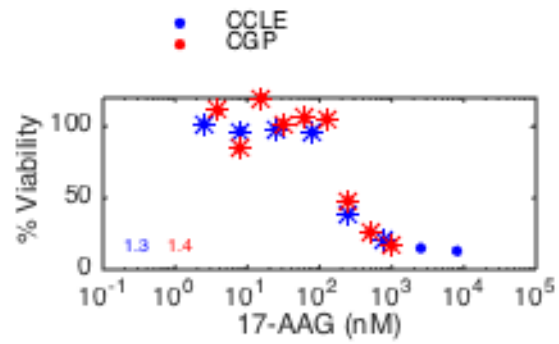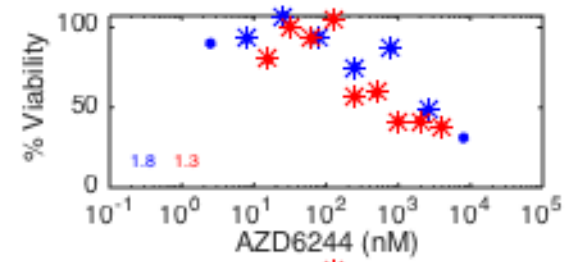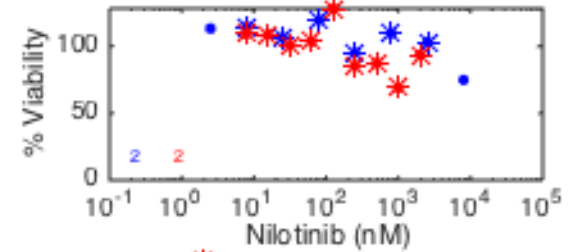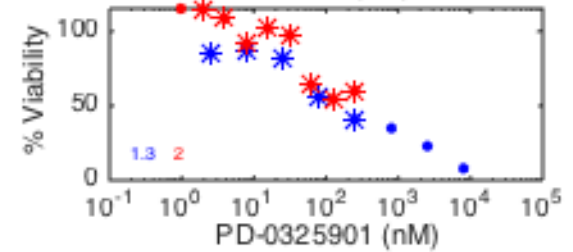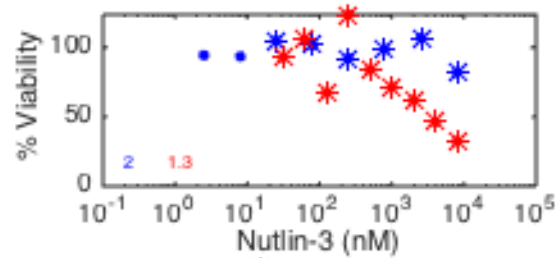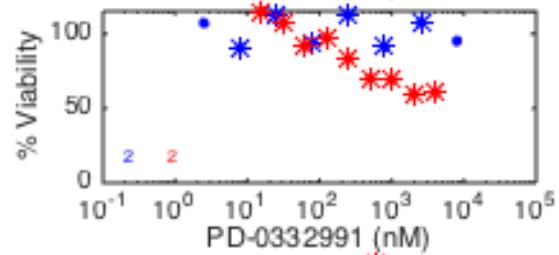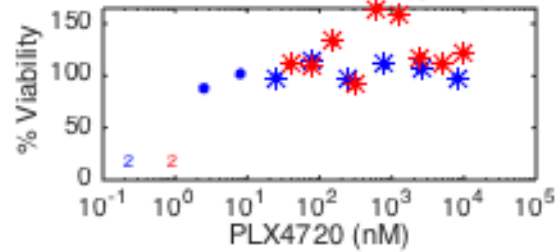

# HD-MY-Z

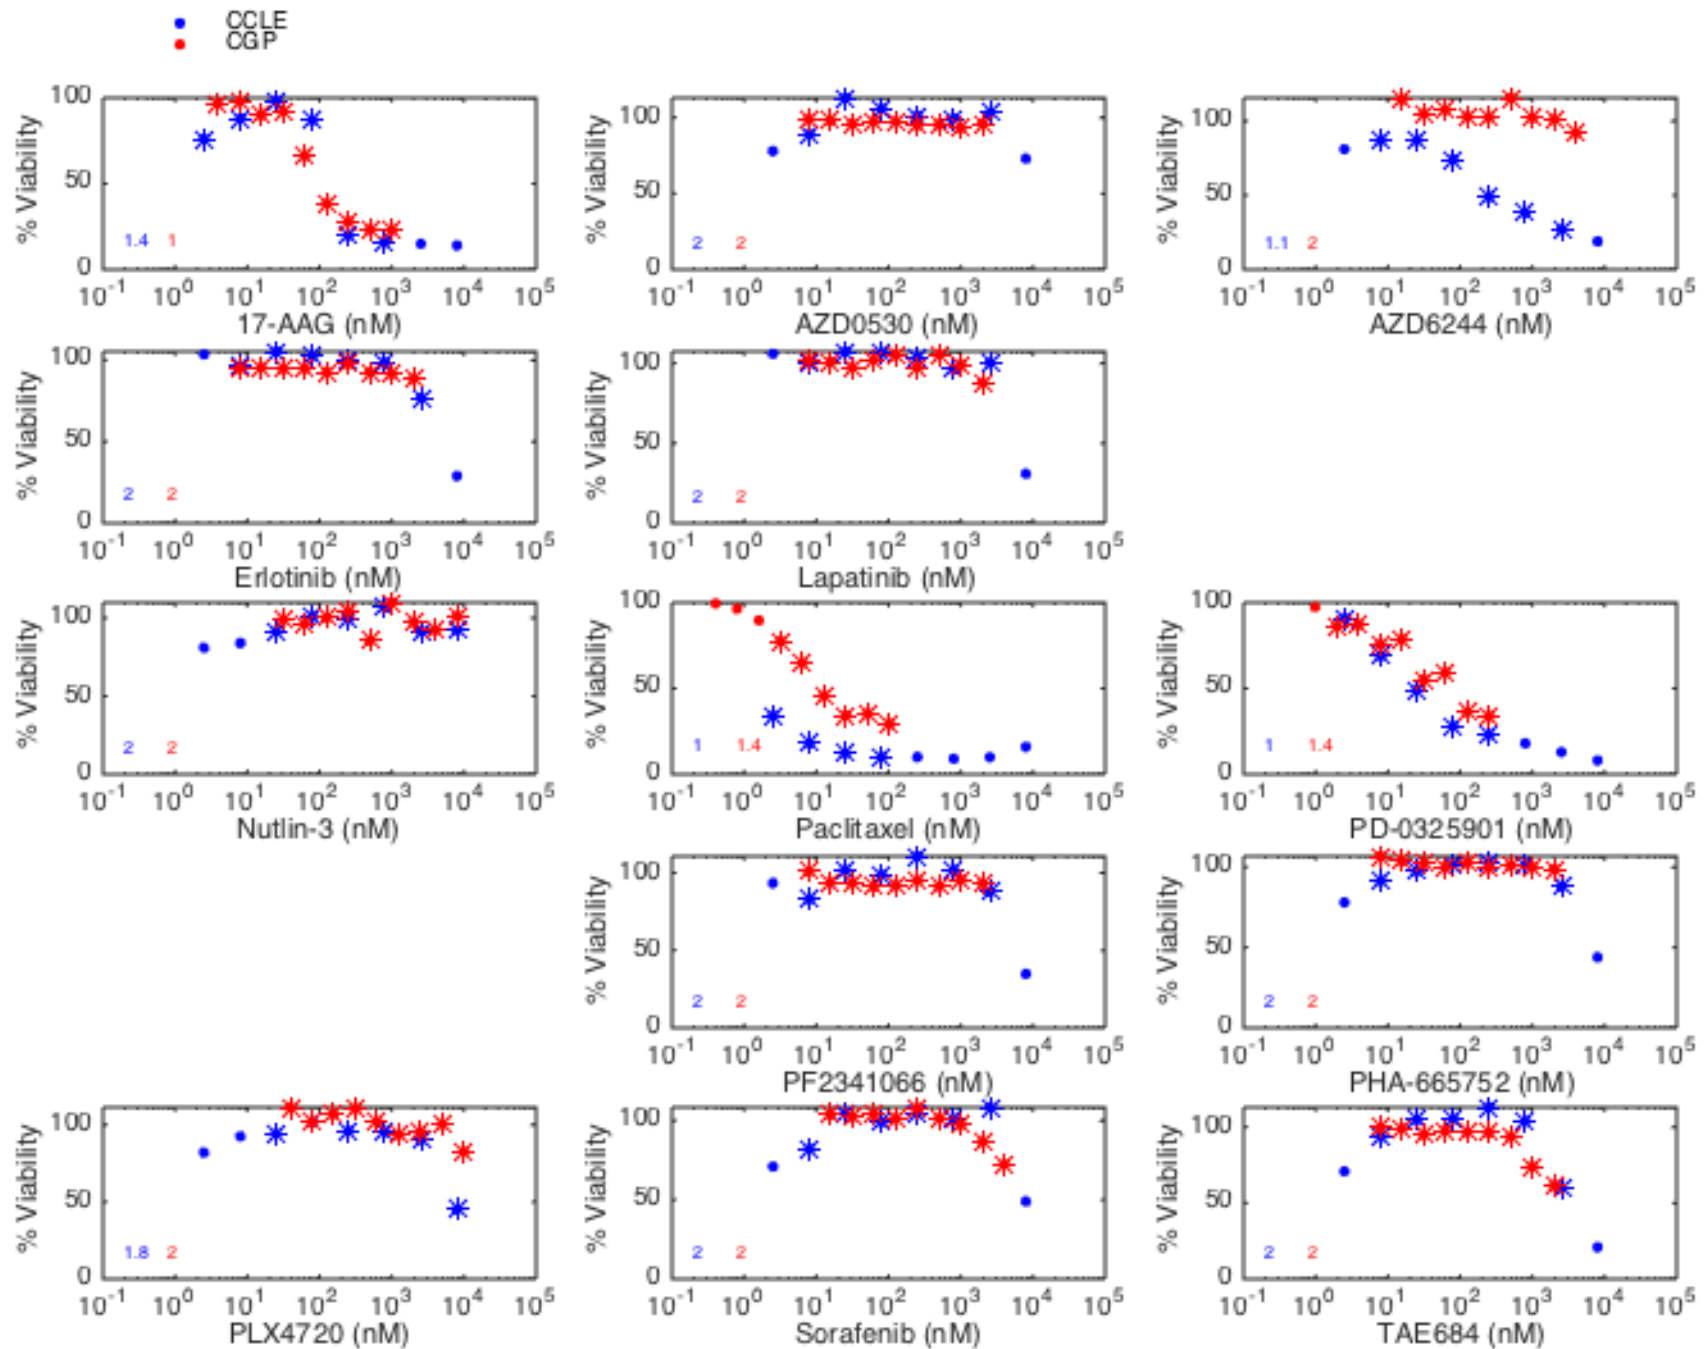

# HEC-1

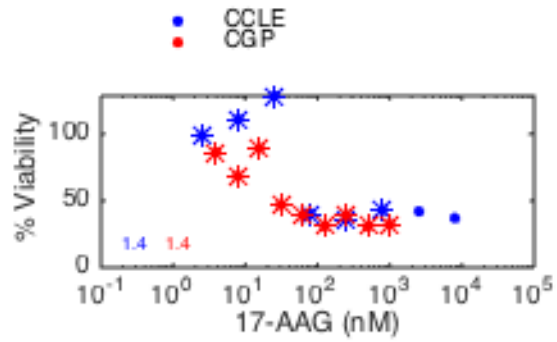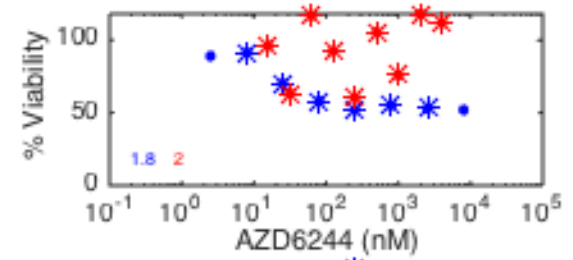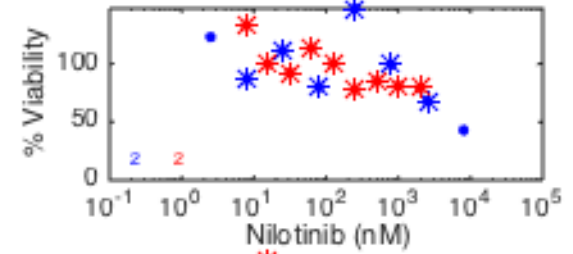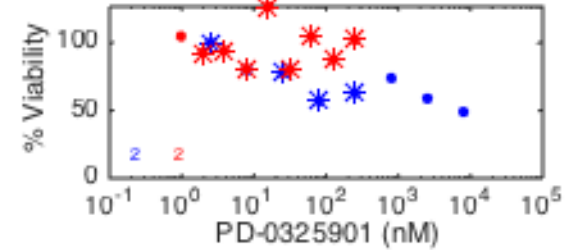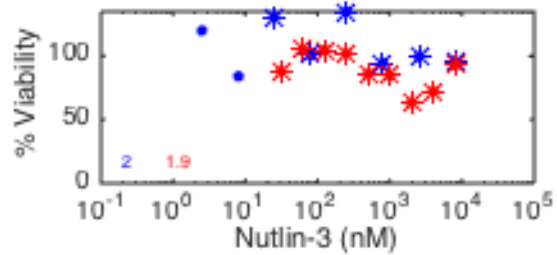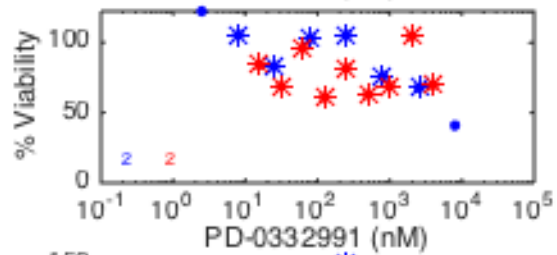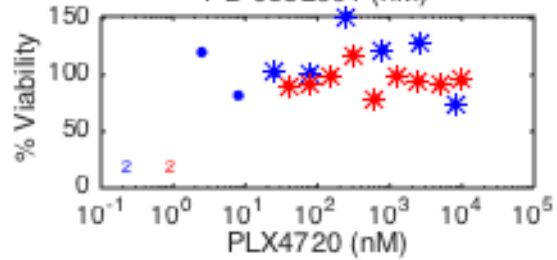

# HGC-27

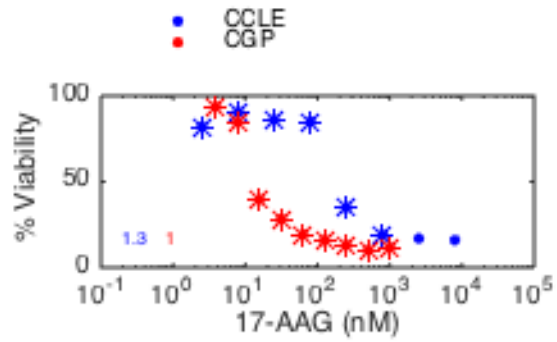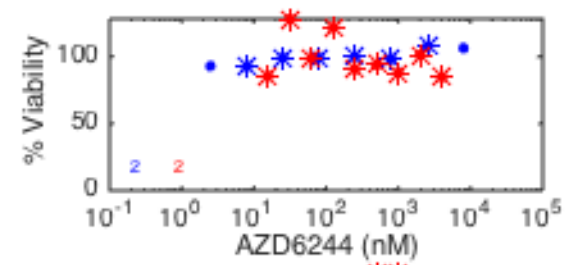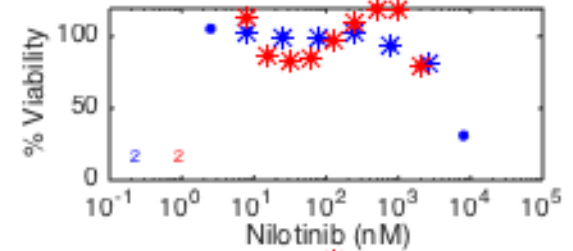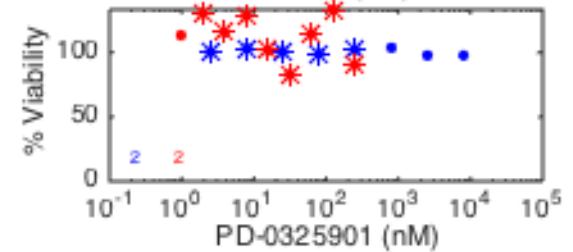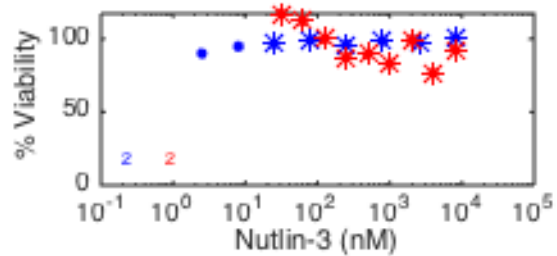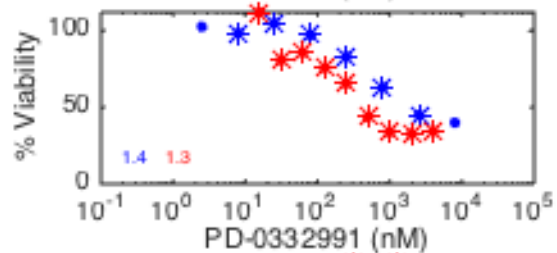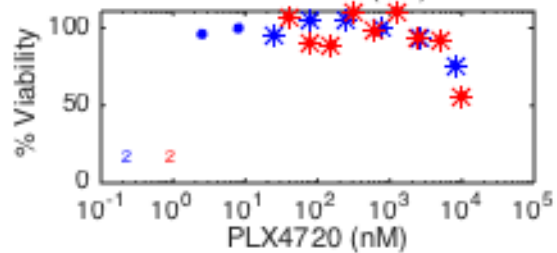



# HH

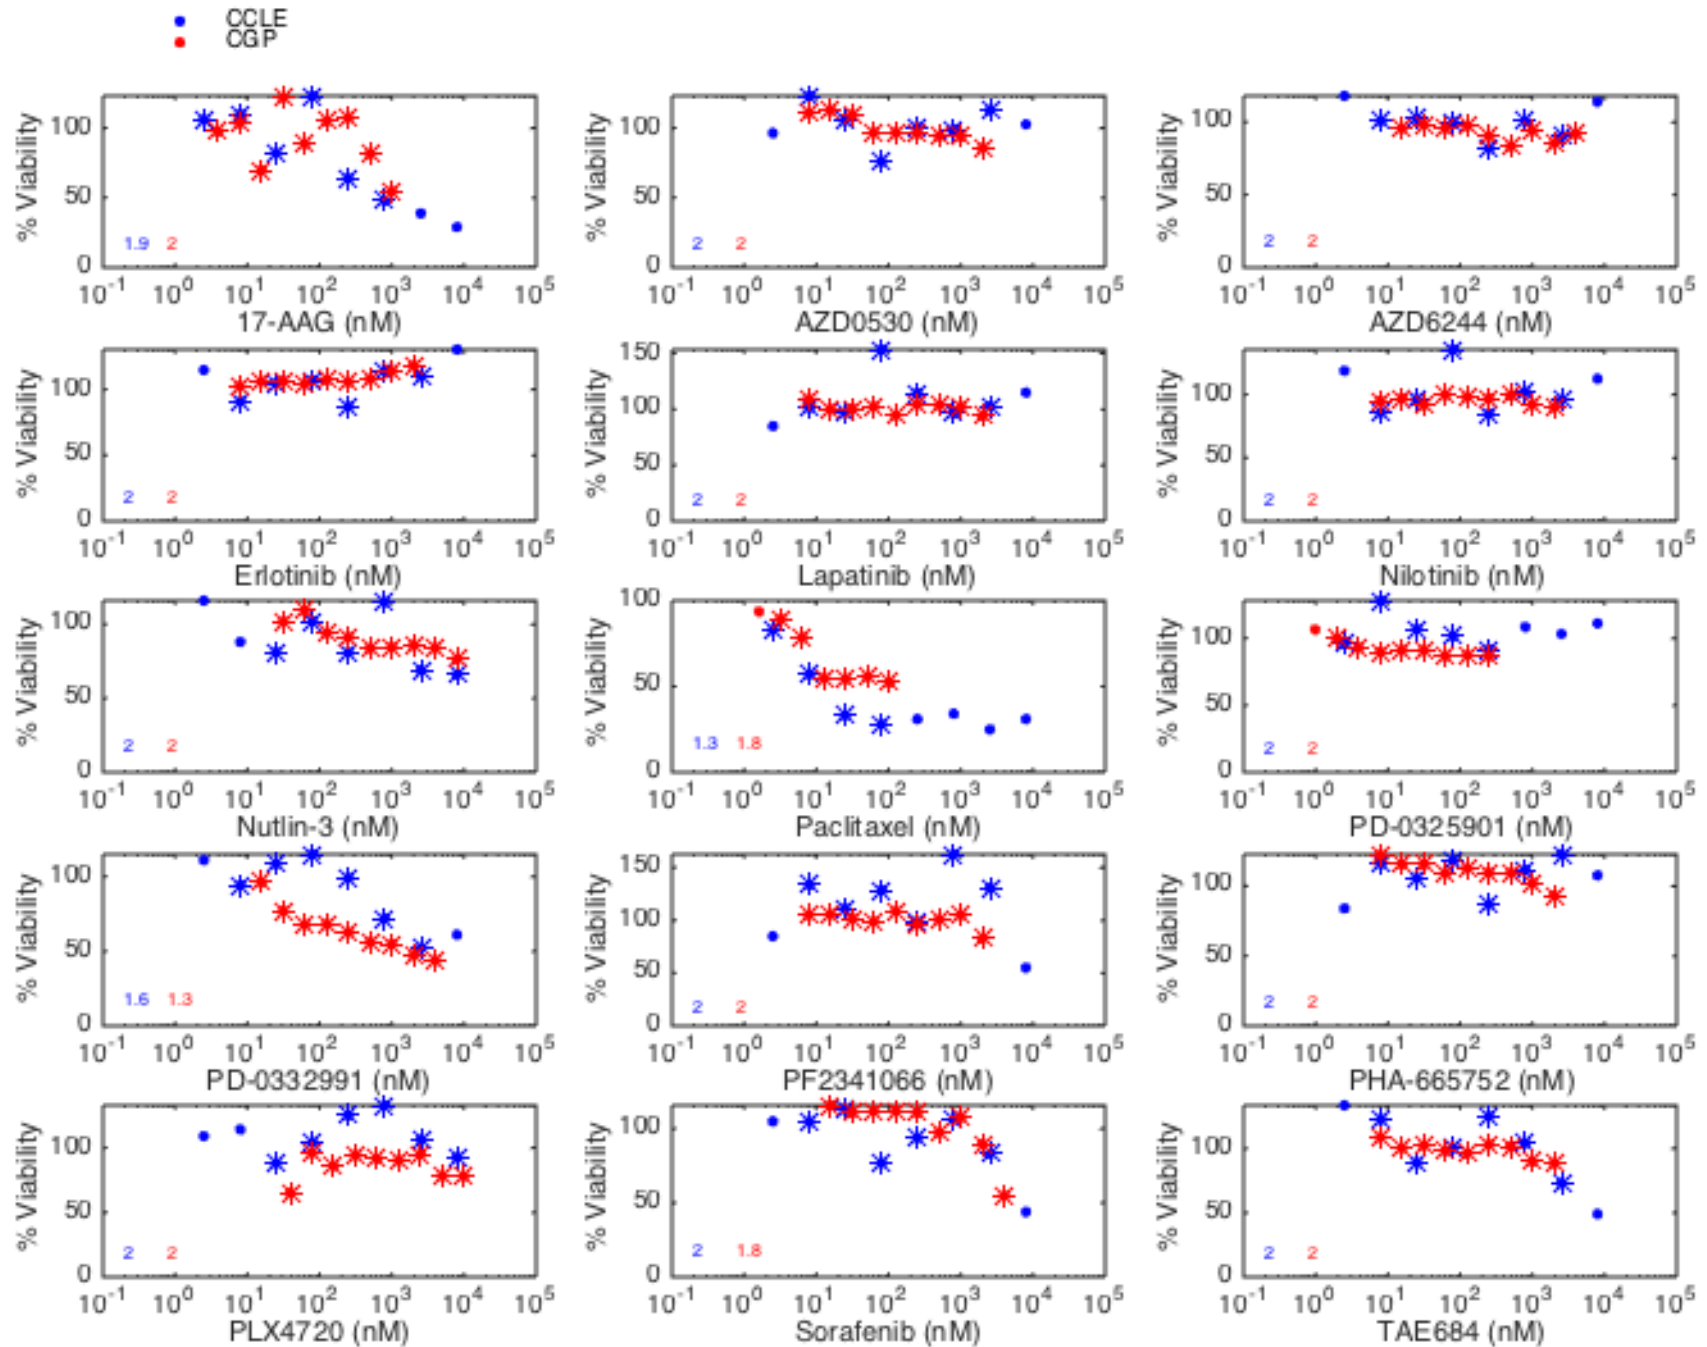

# HLE

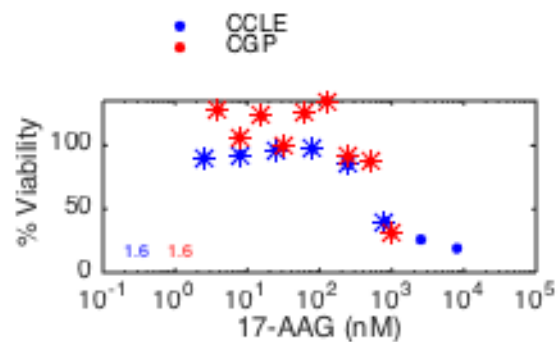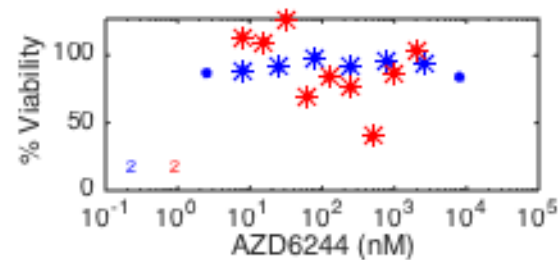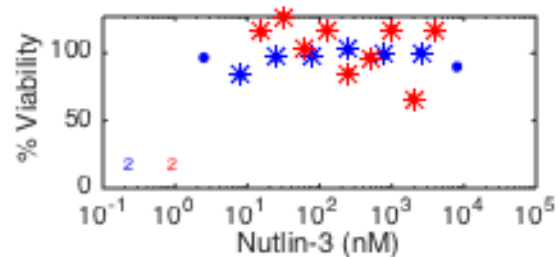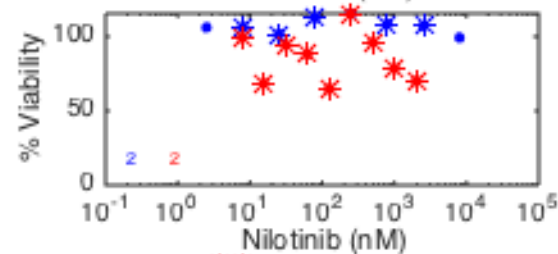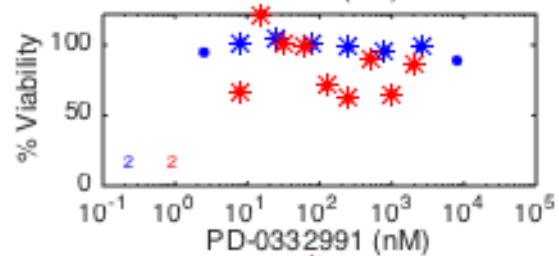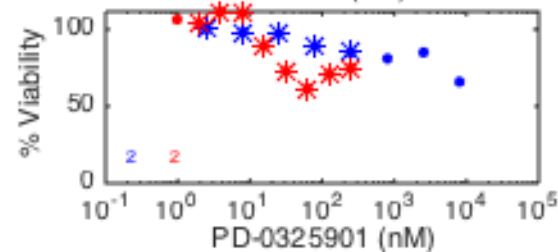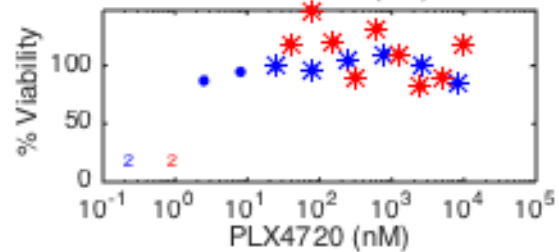

# HOS

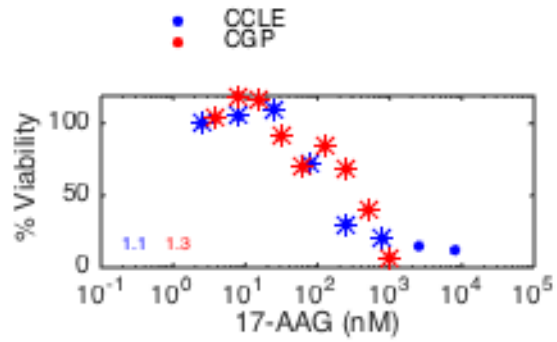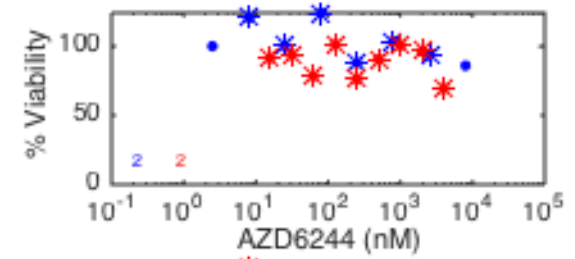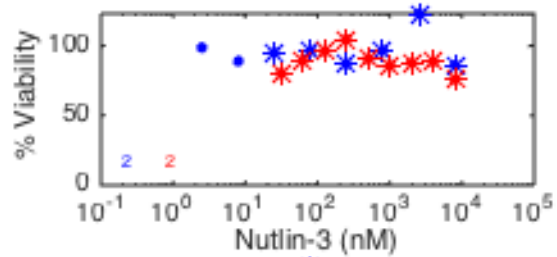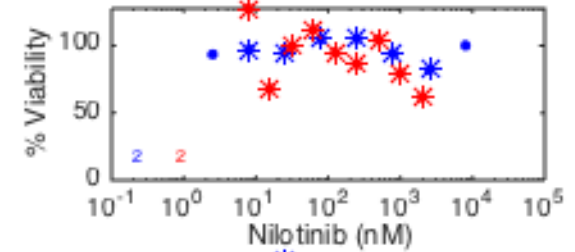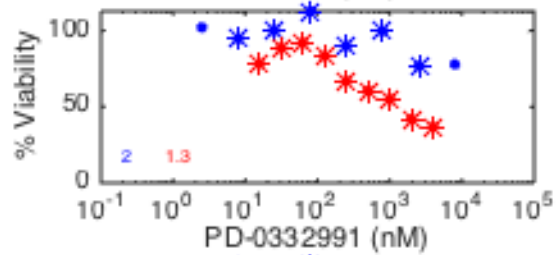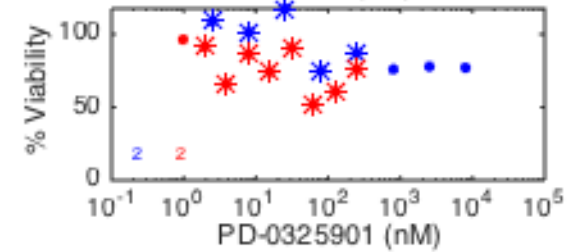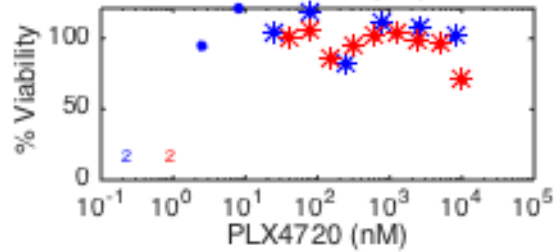

# HPAF-II

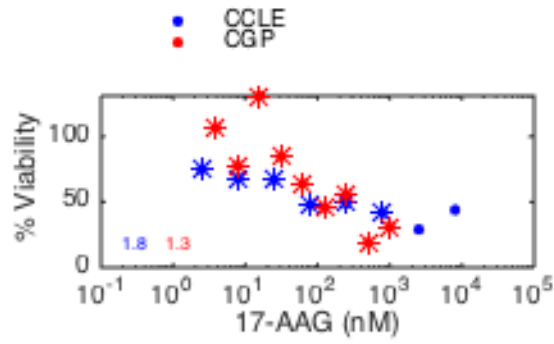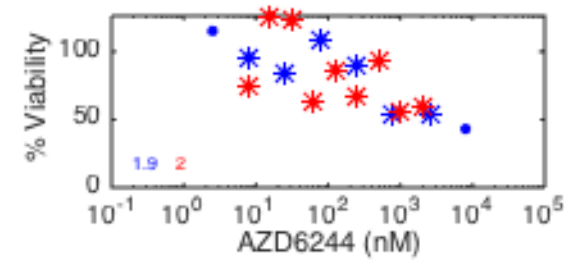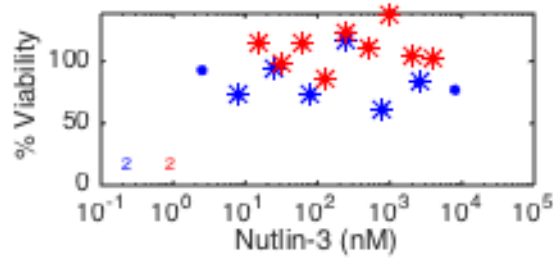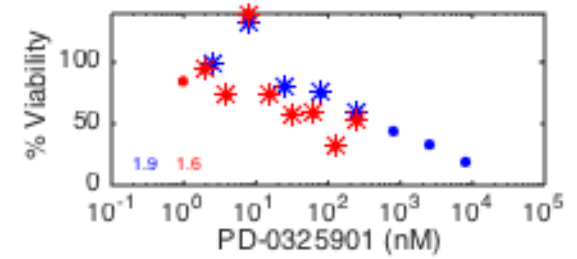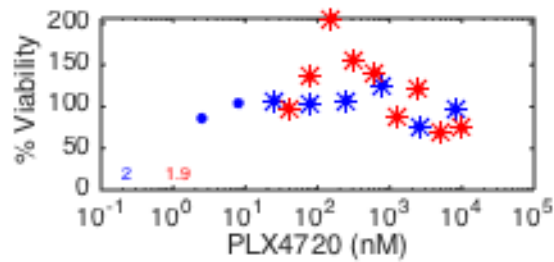

# Hs-578-T

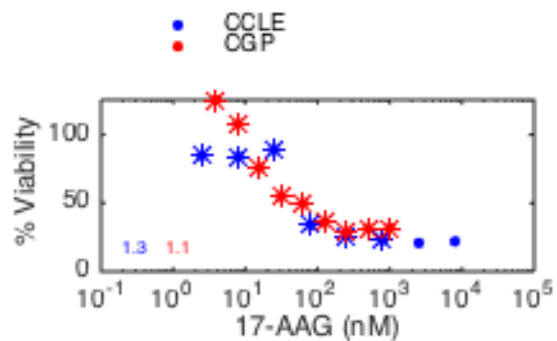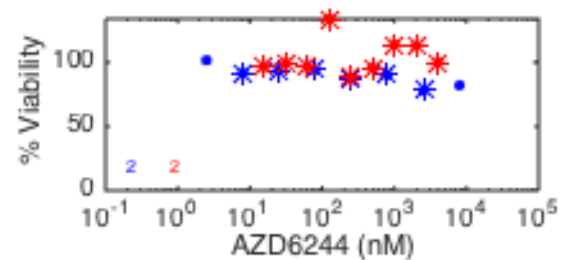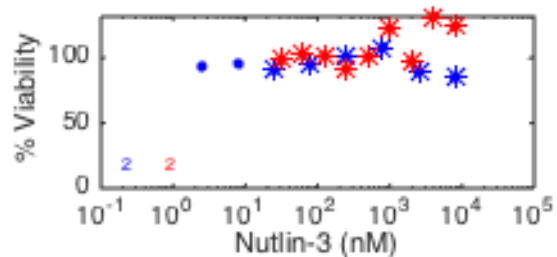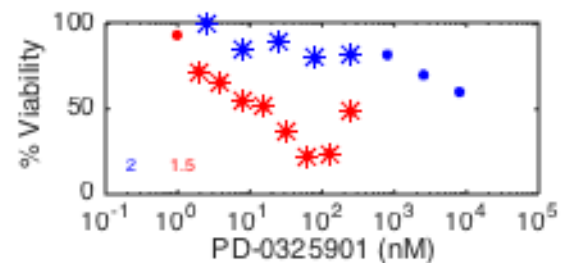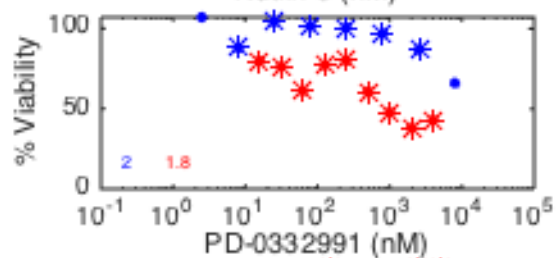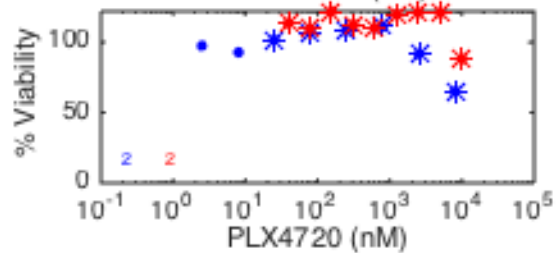

## HSC-2

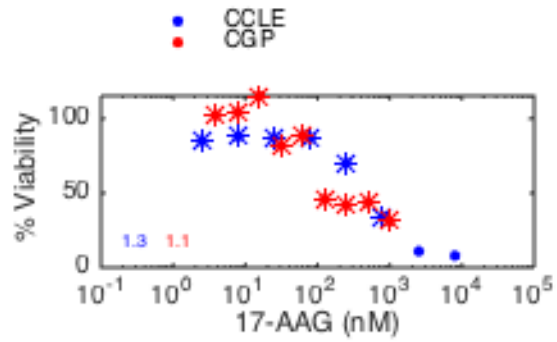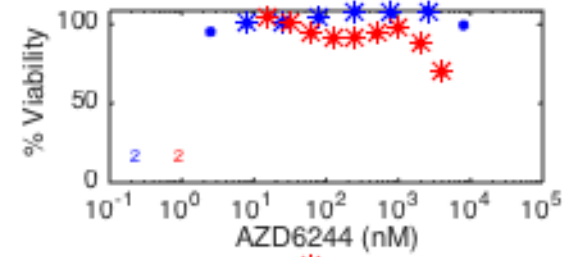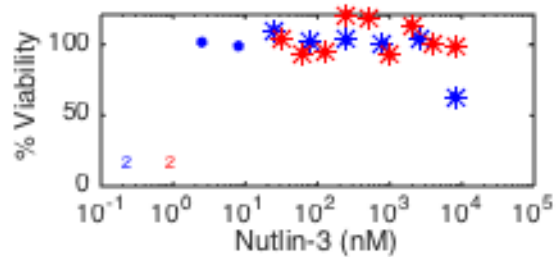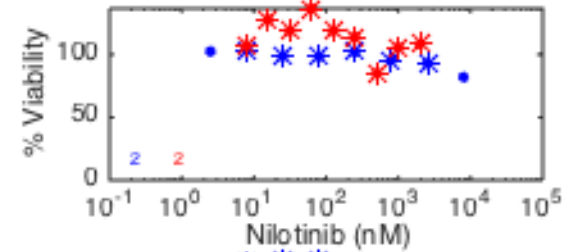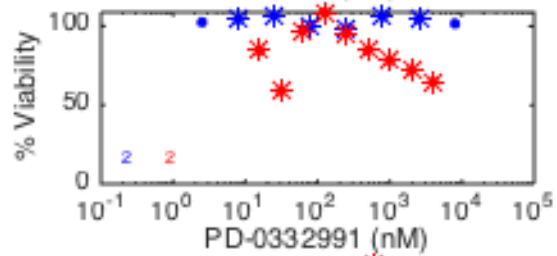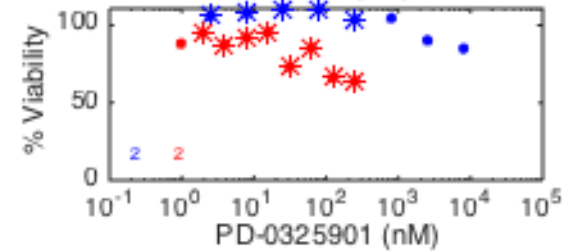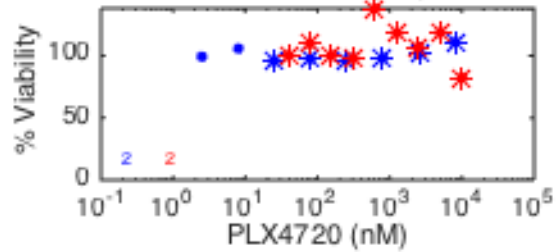

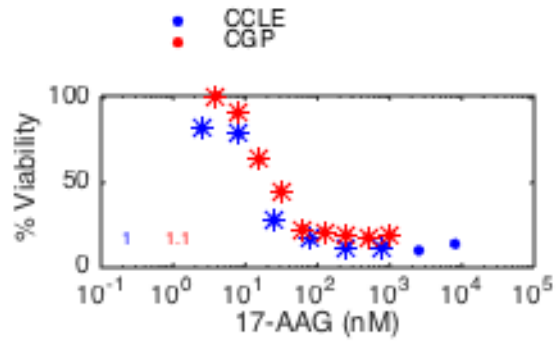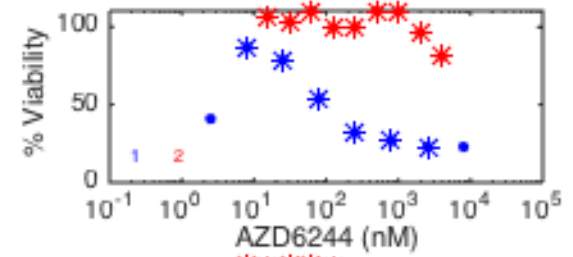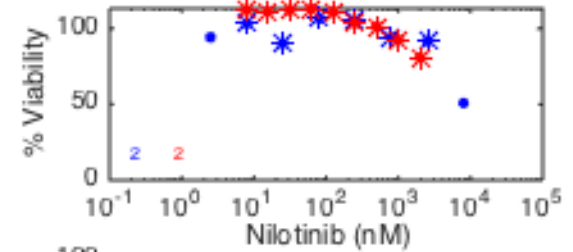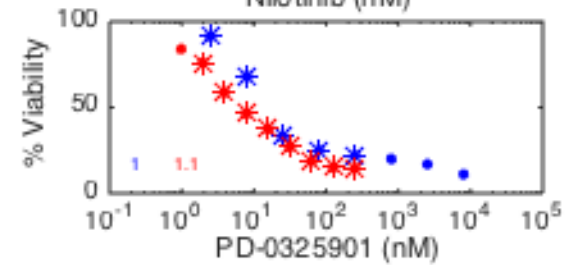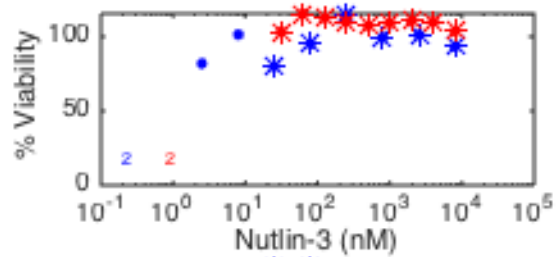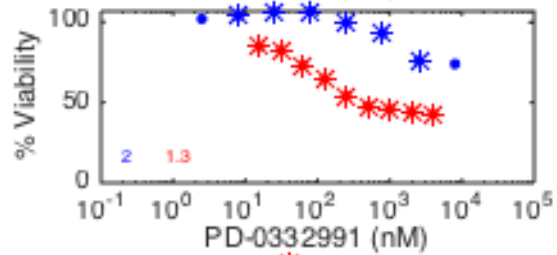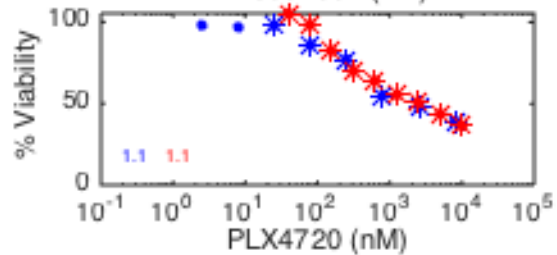

# HT-144

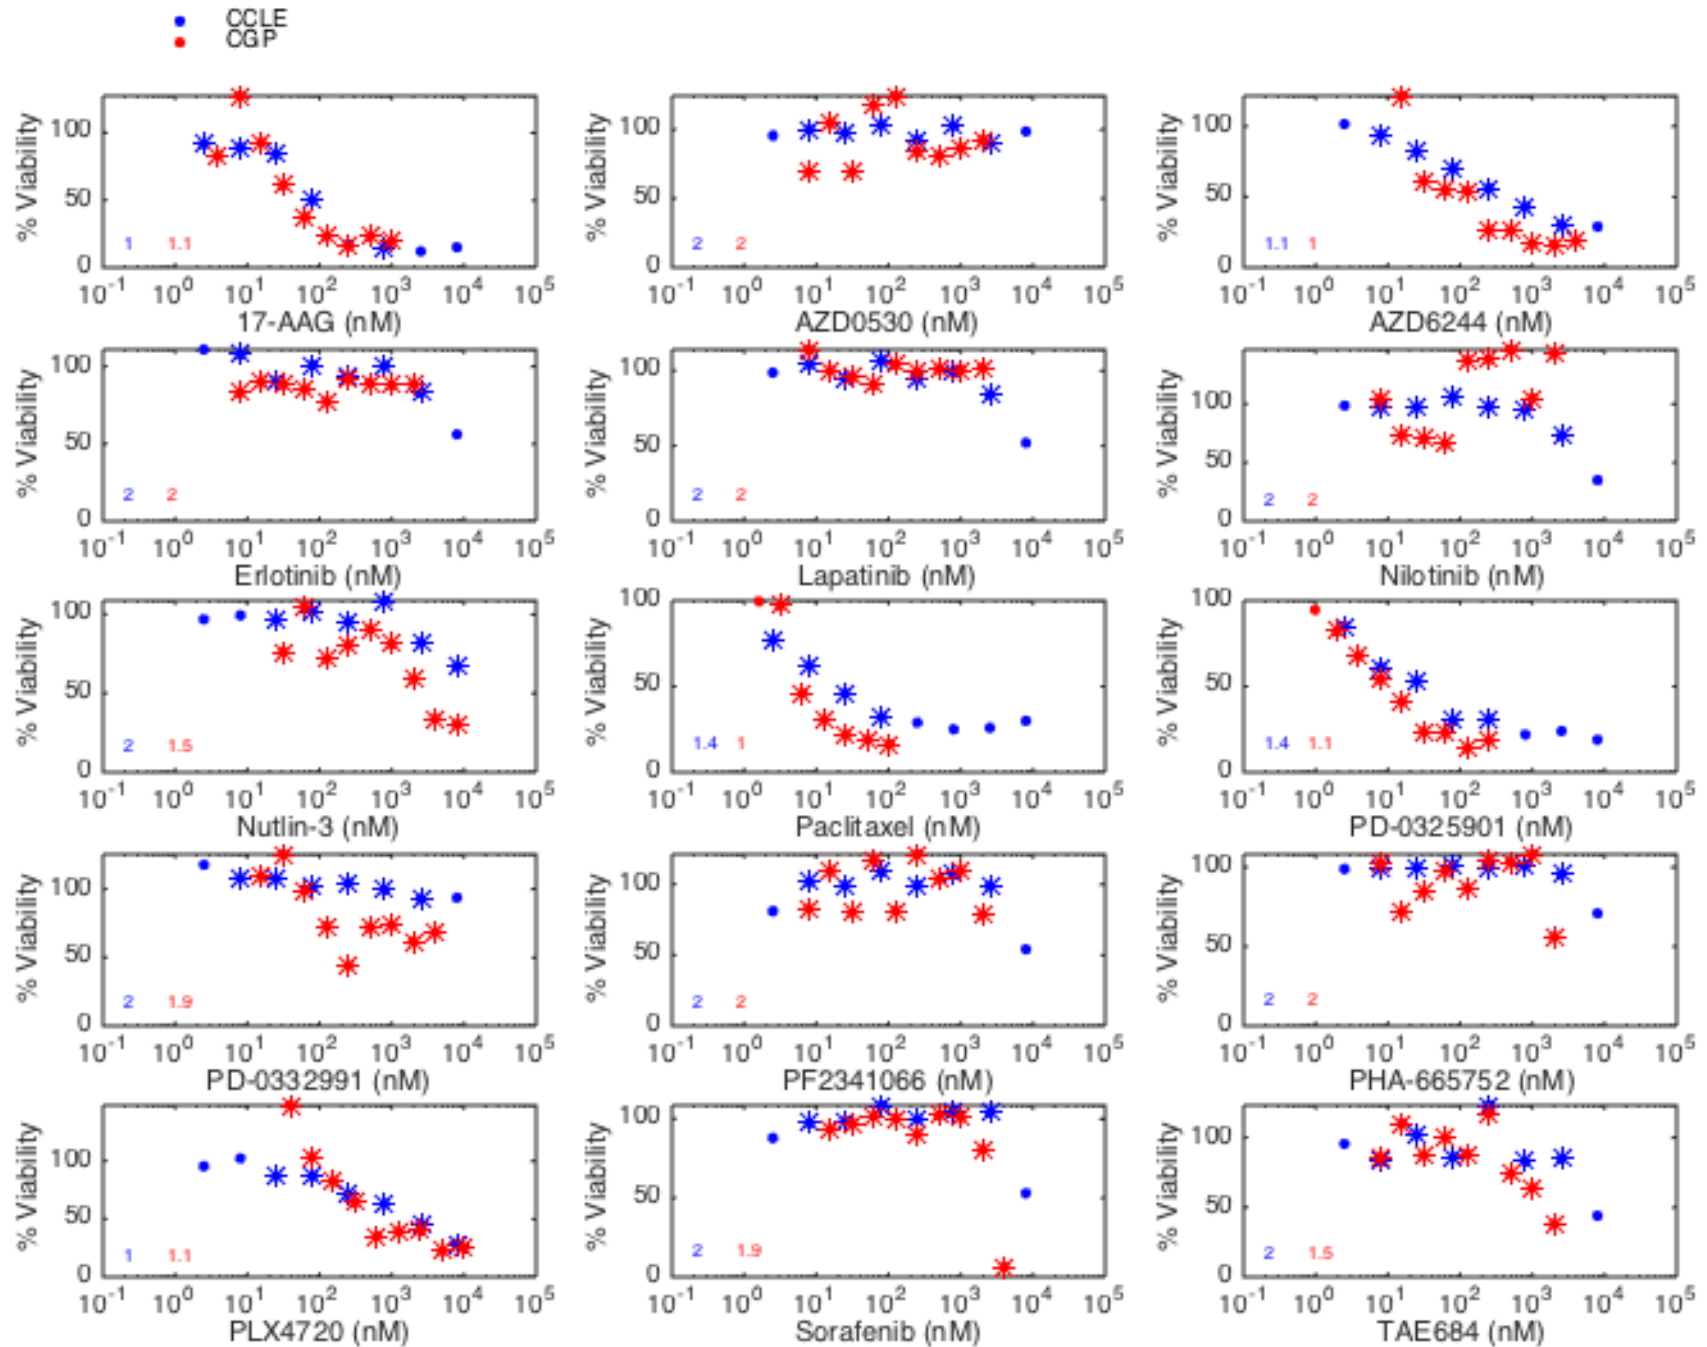



# HT-1080

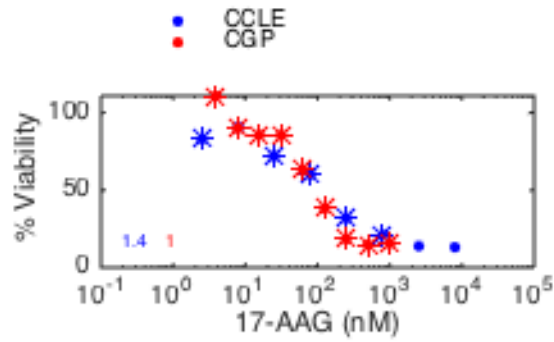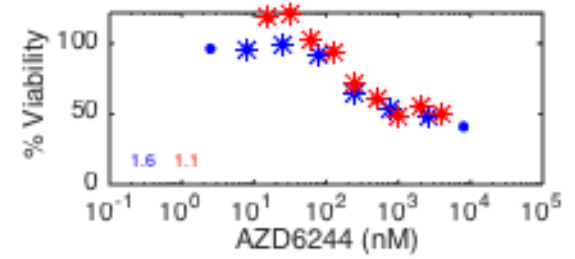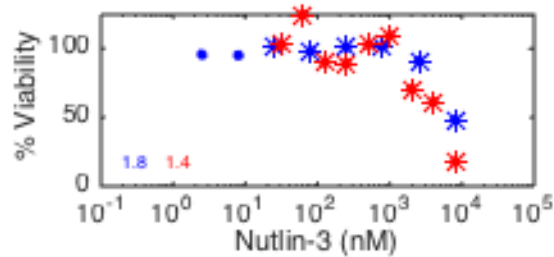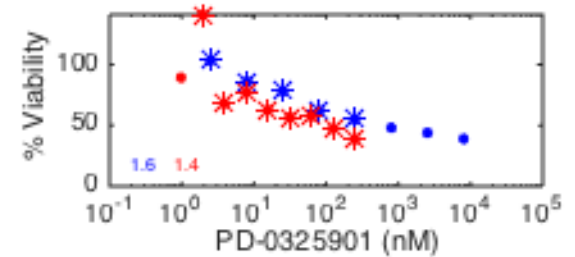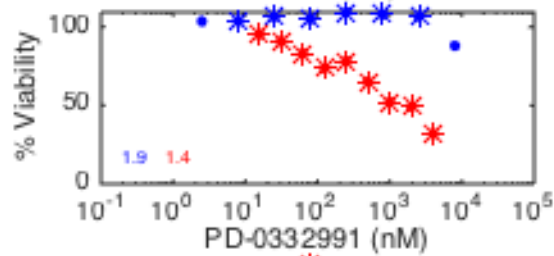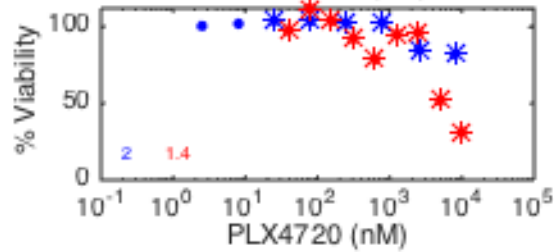

# HT-1197

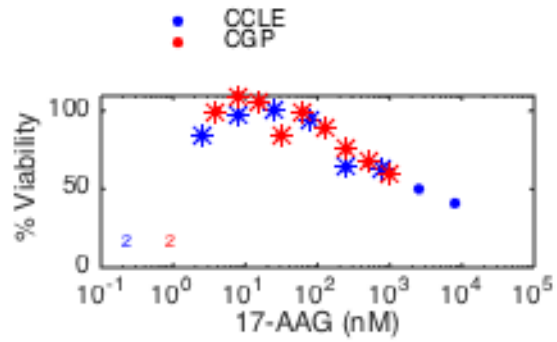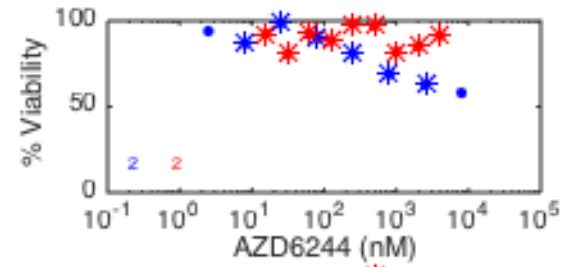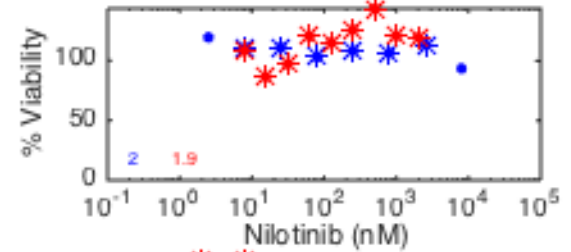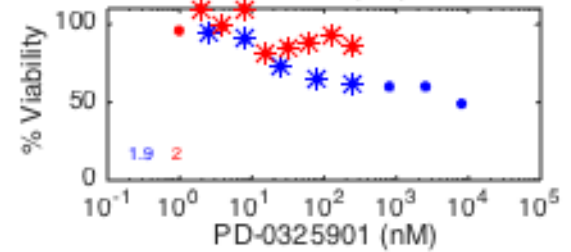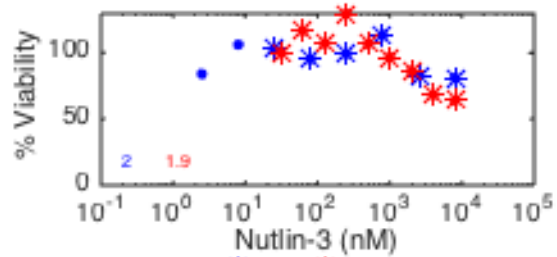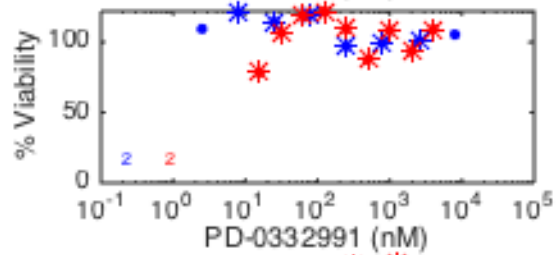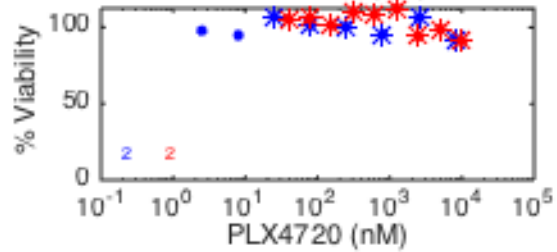

HT-1376

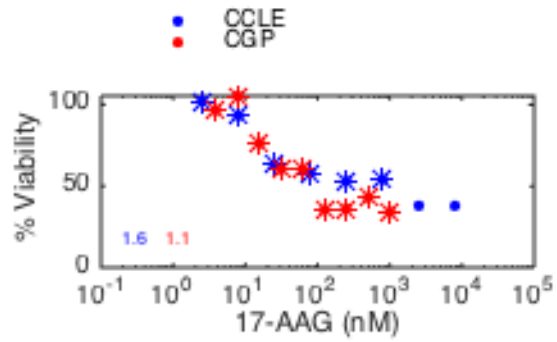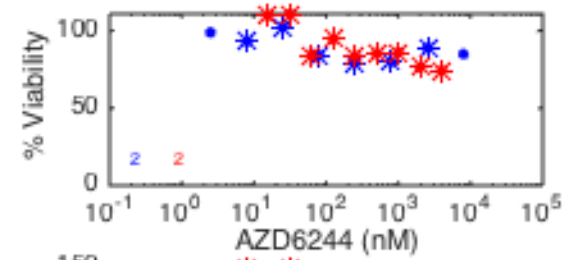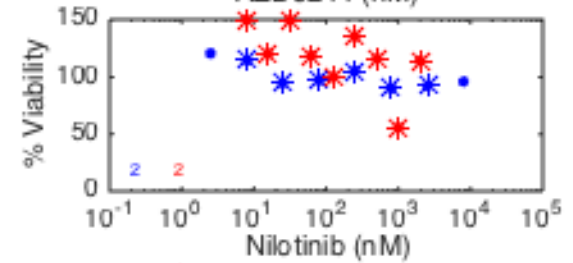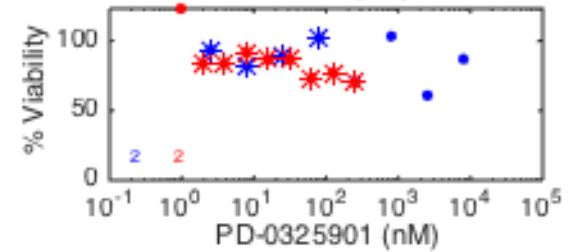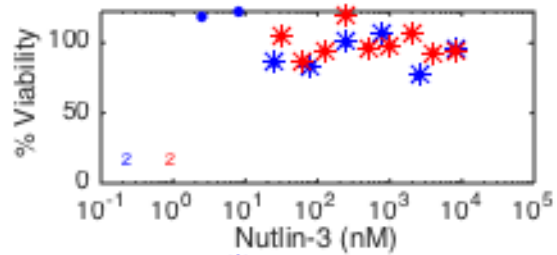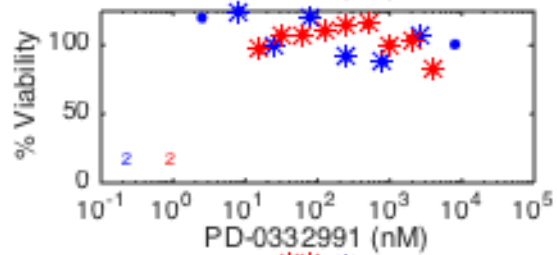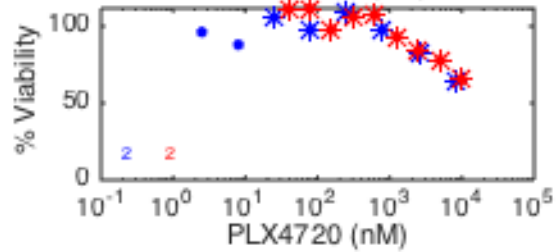

# HT

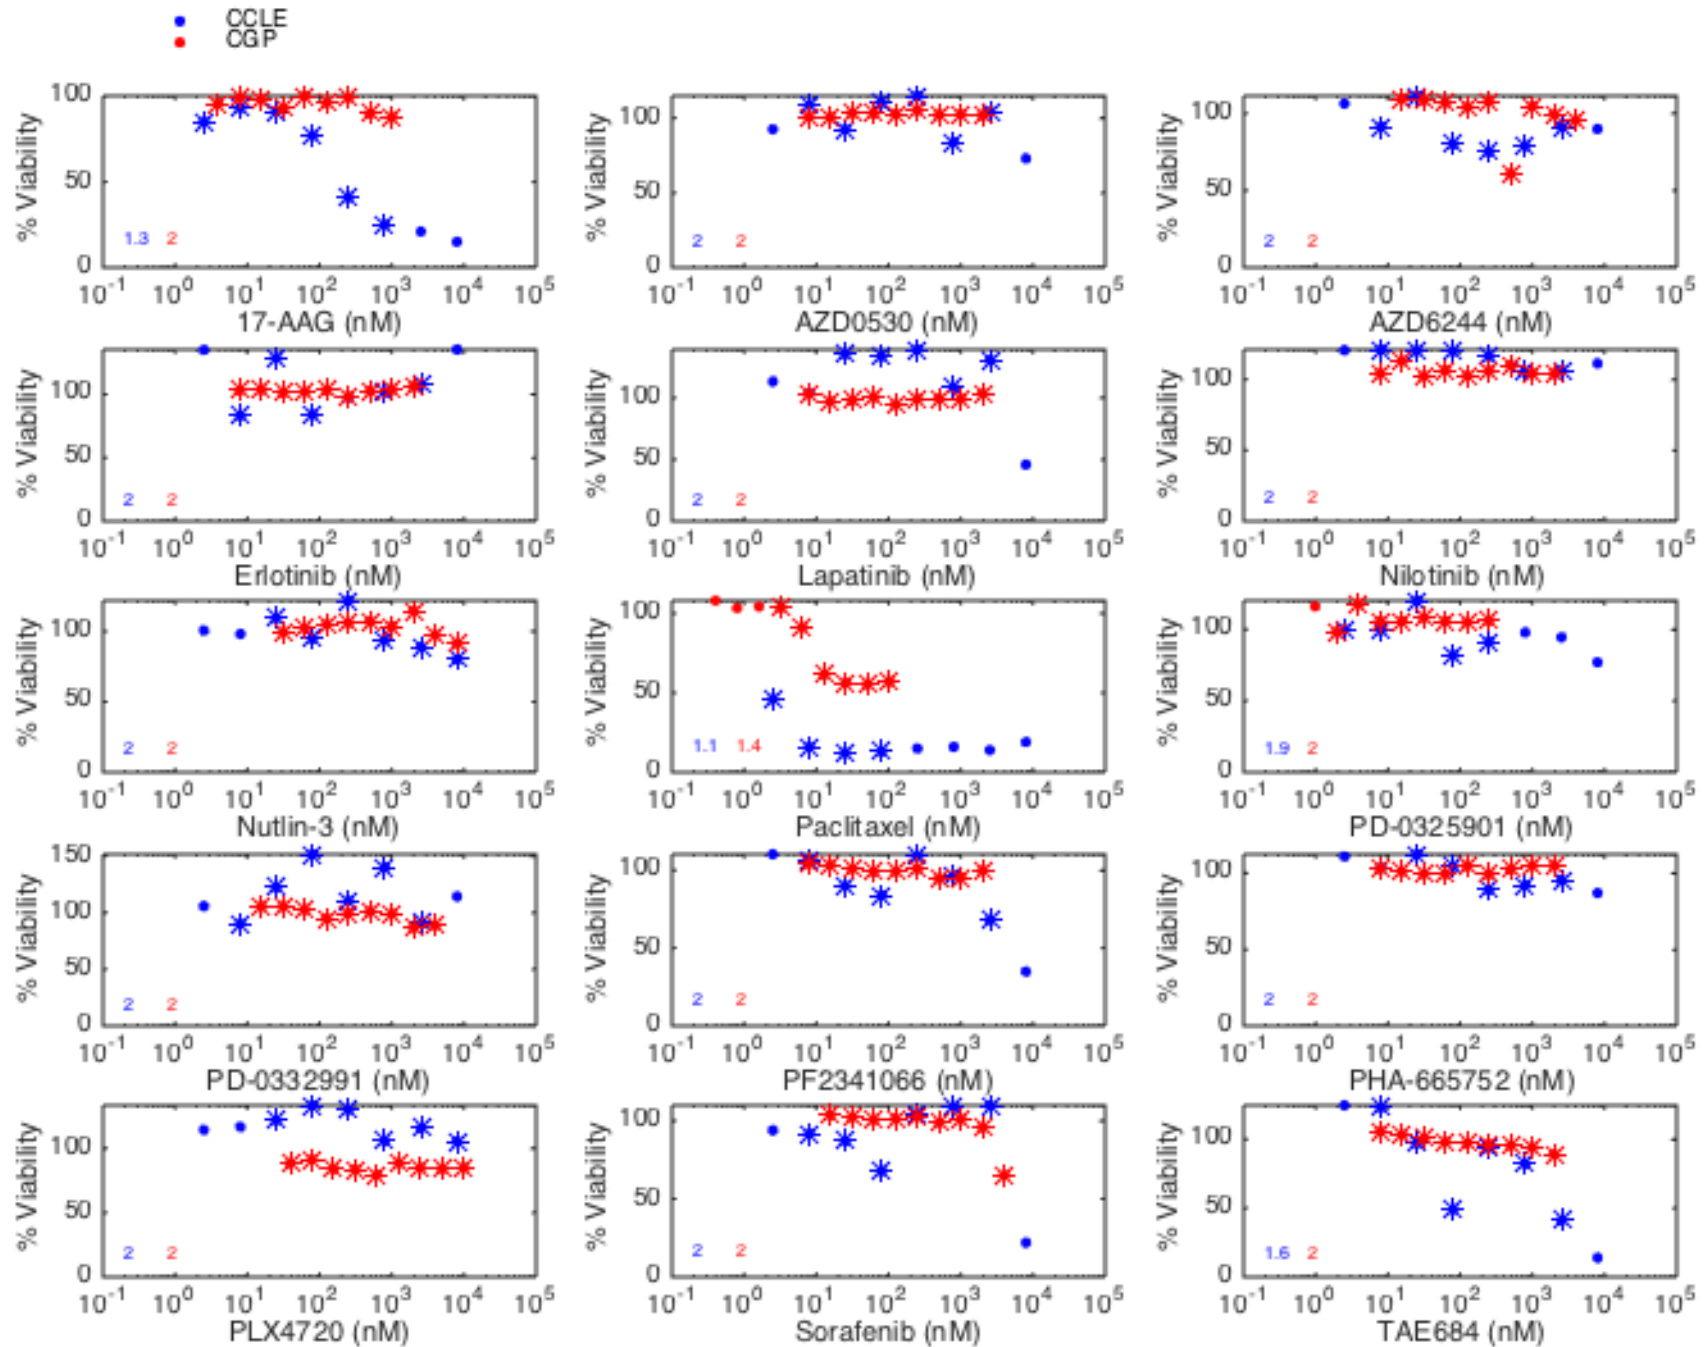

# HuCCT1

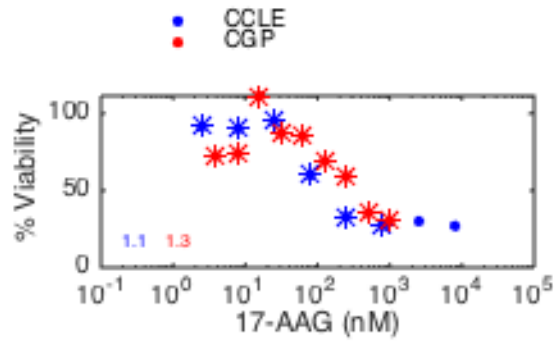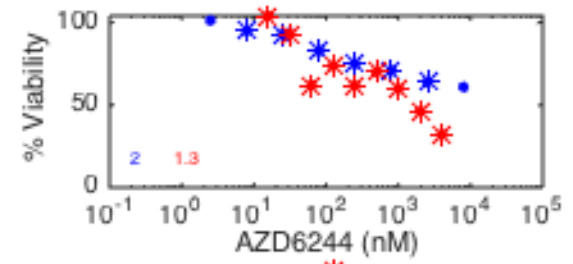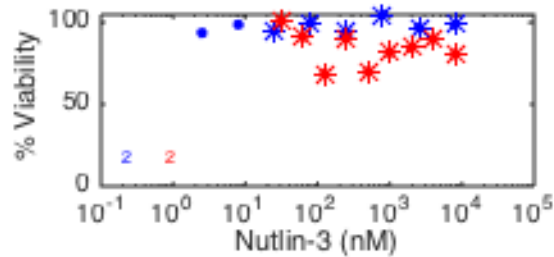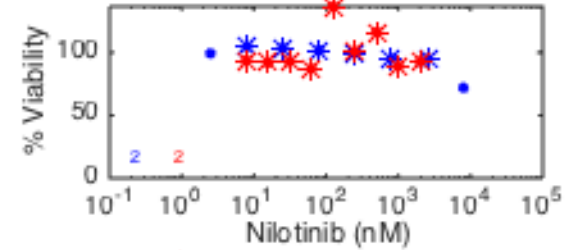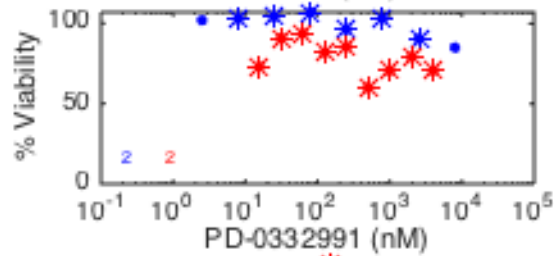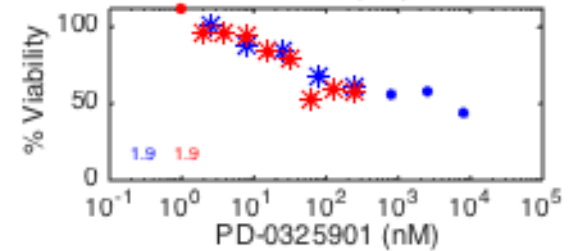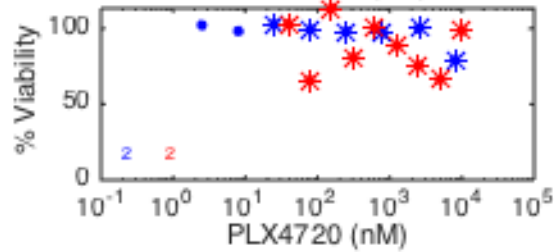

# HuP-T3

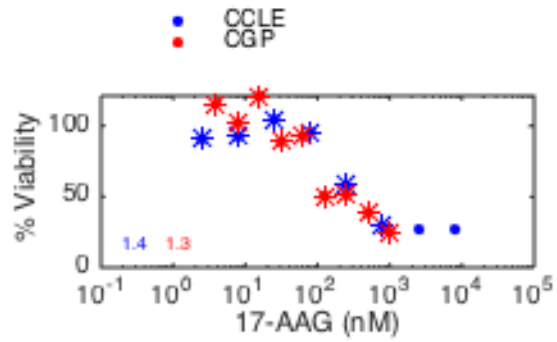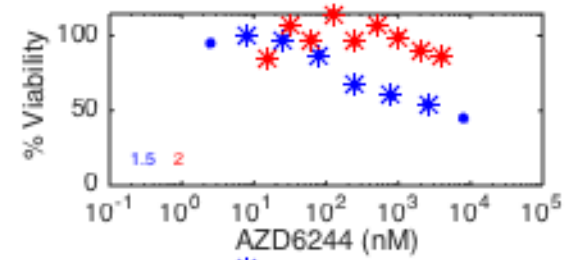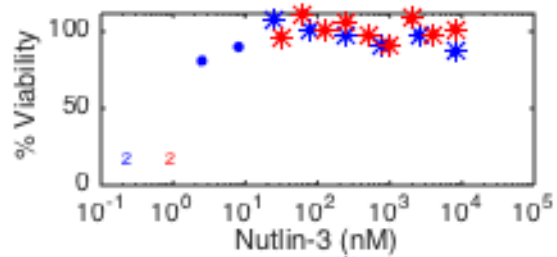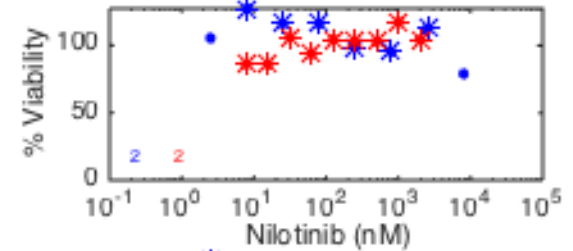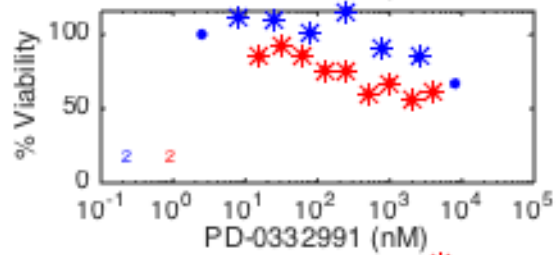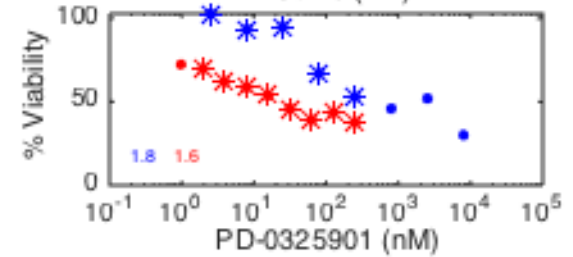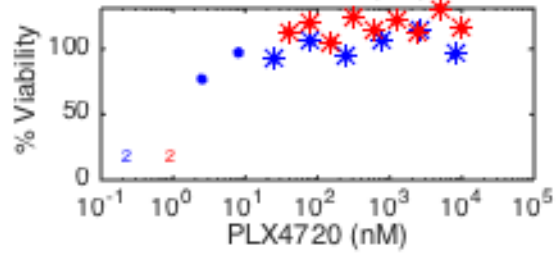

# HuP-T4

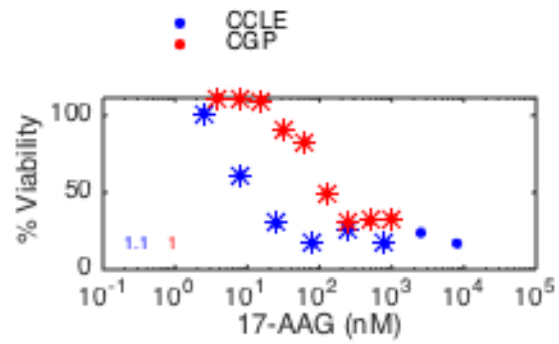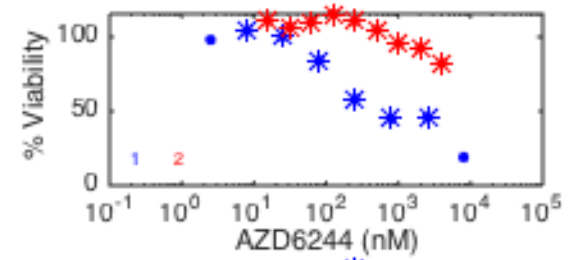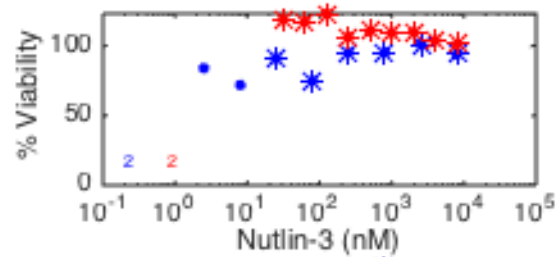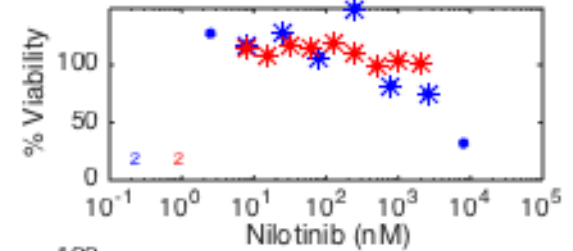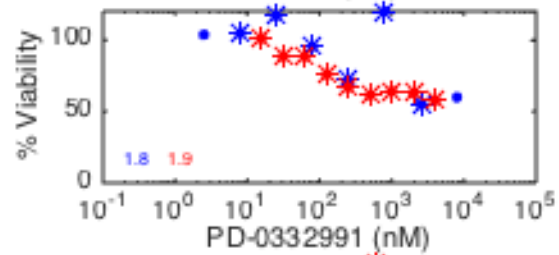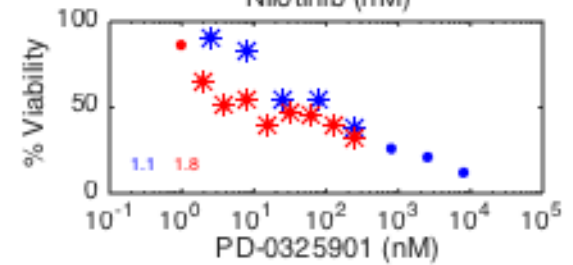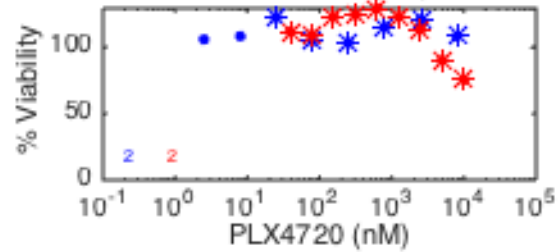

# IA-LM

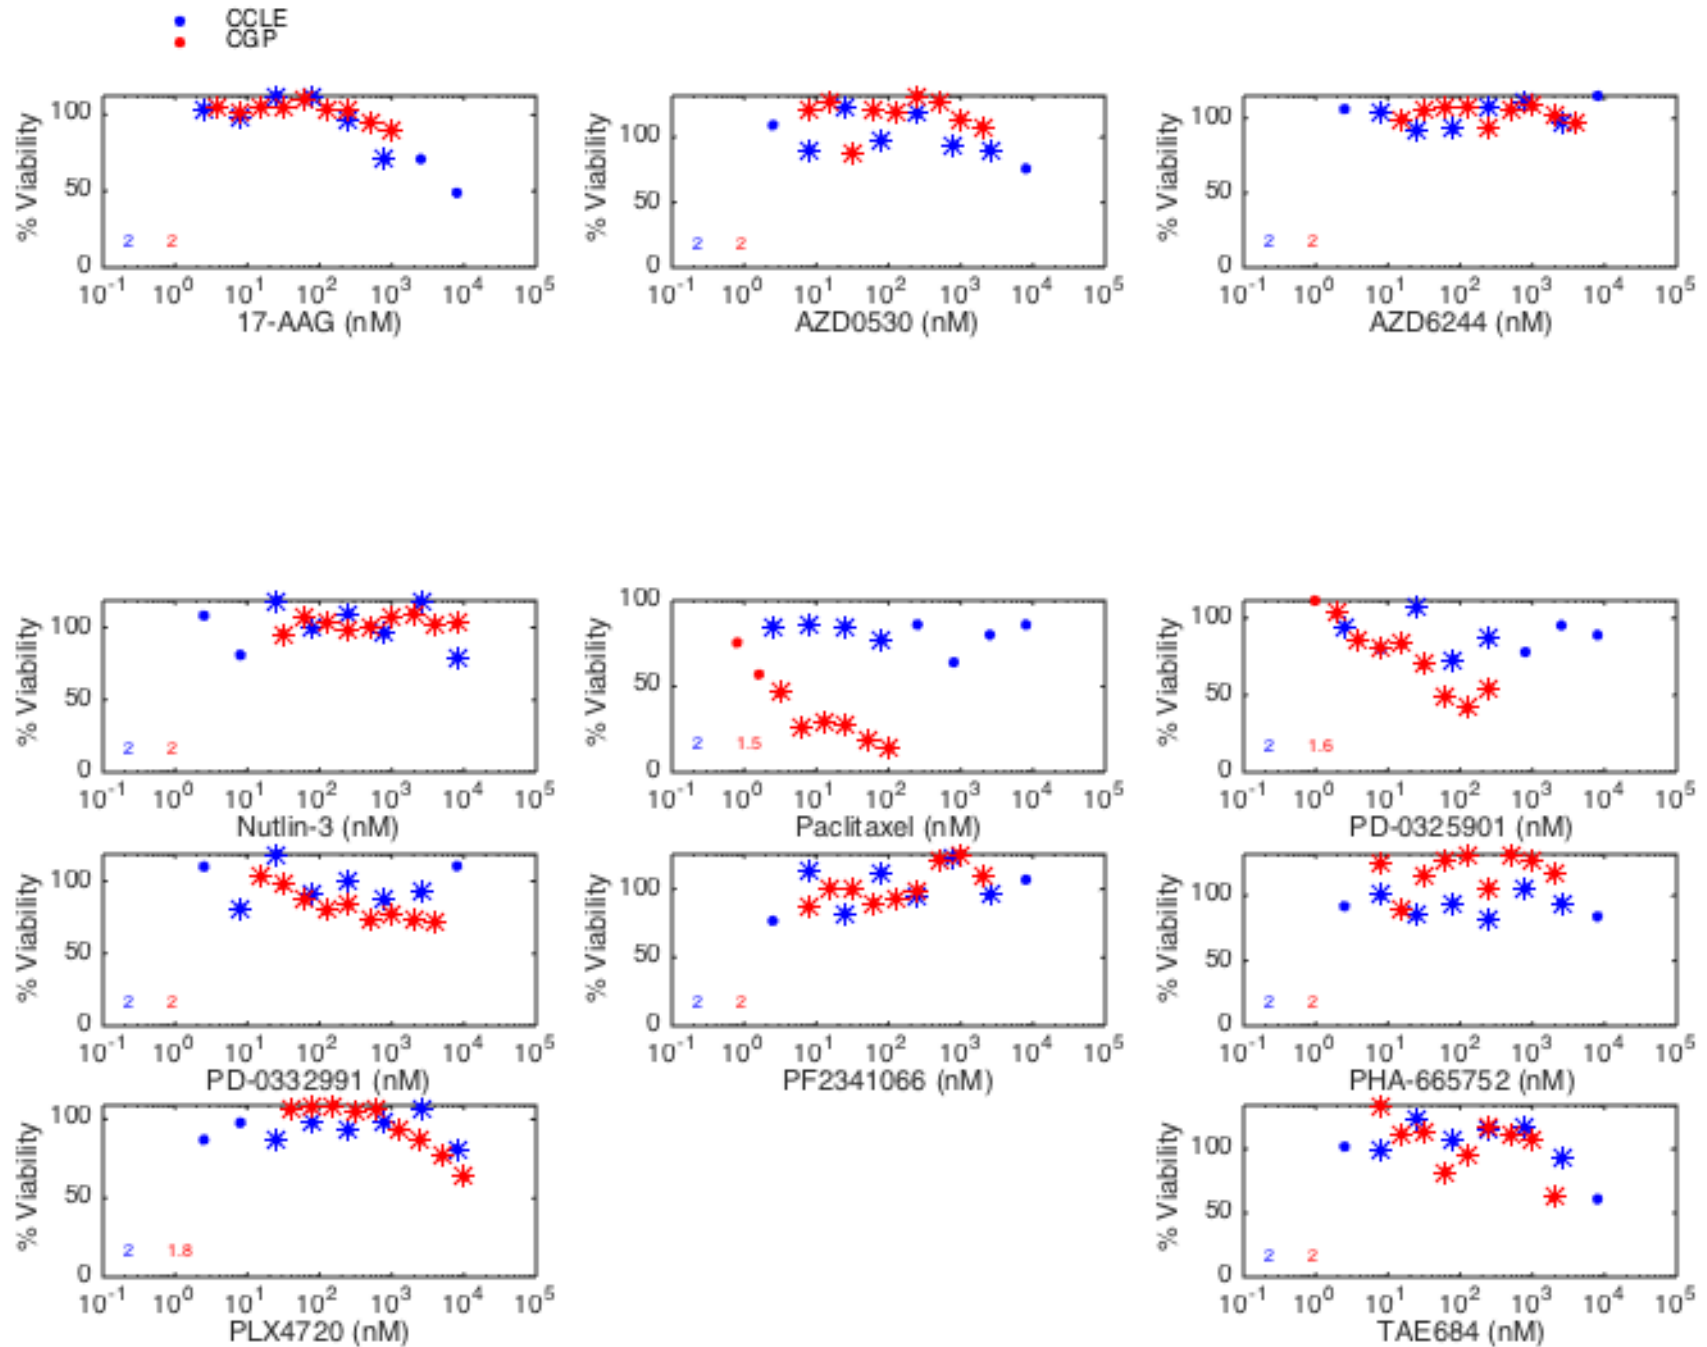



# IGROV-1

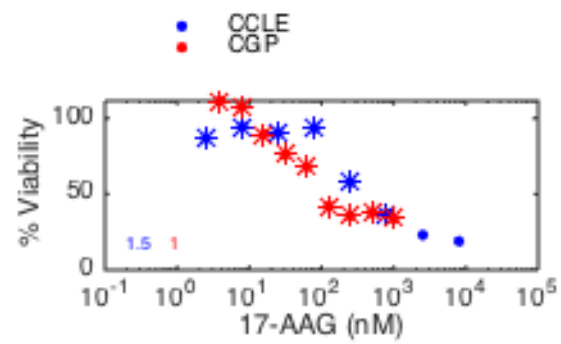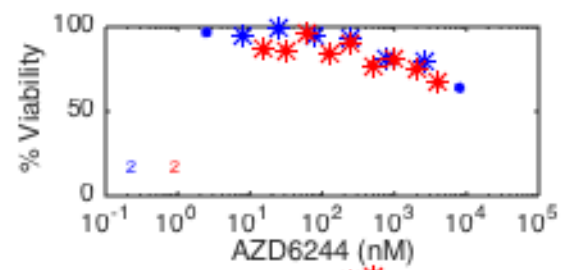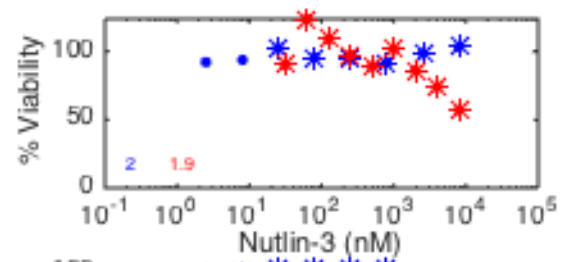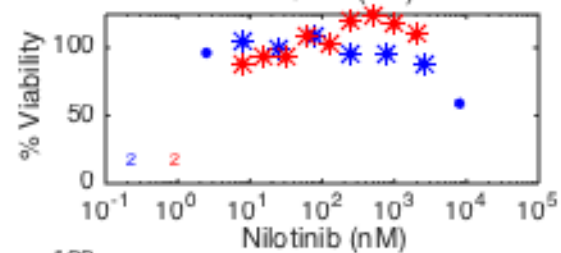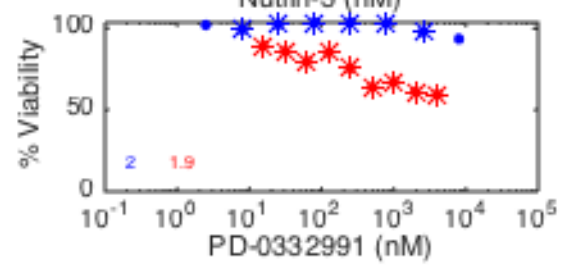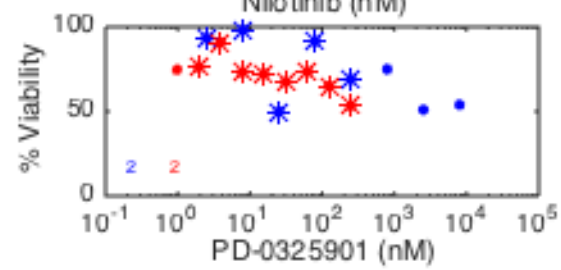

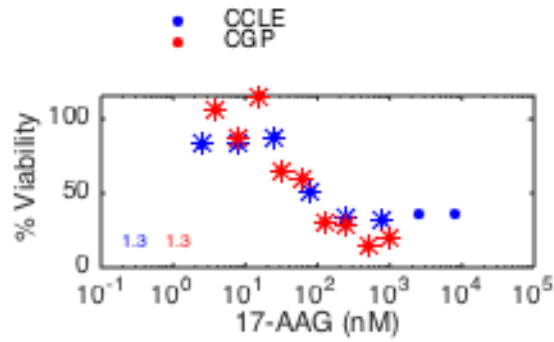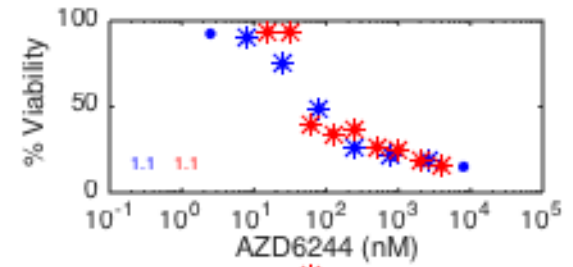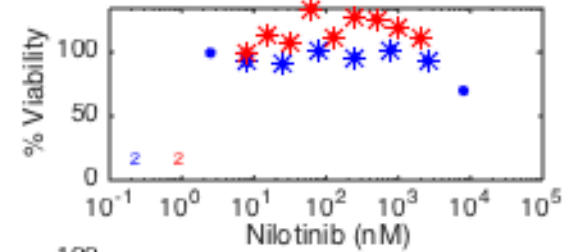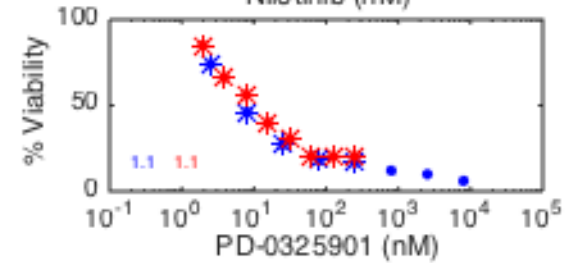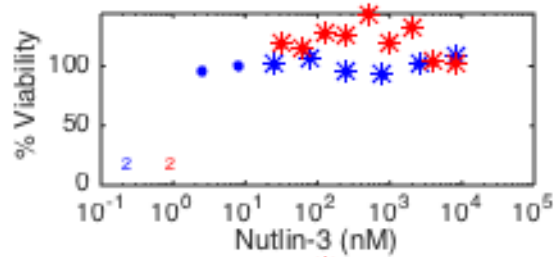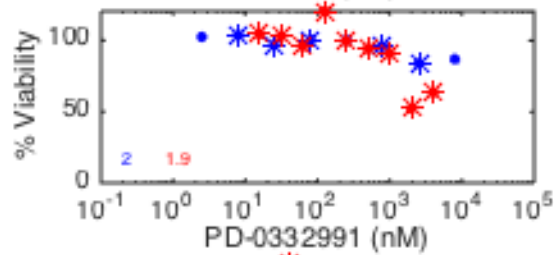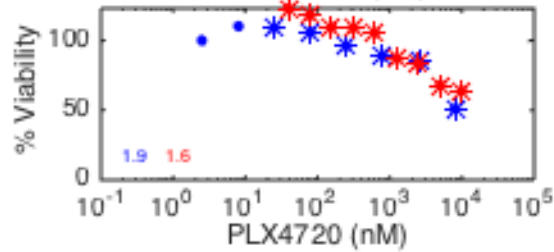

# IST-MES1

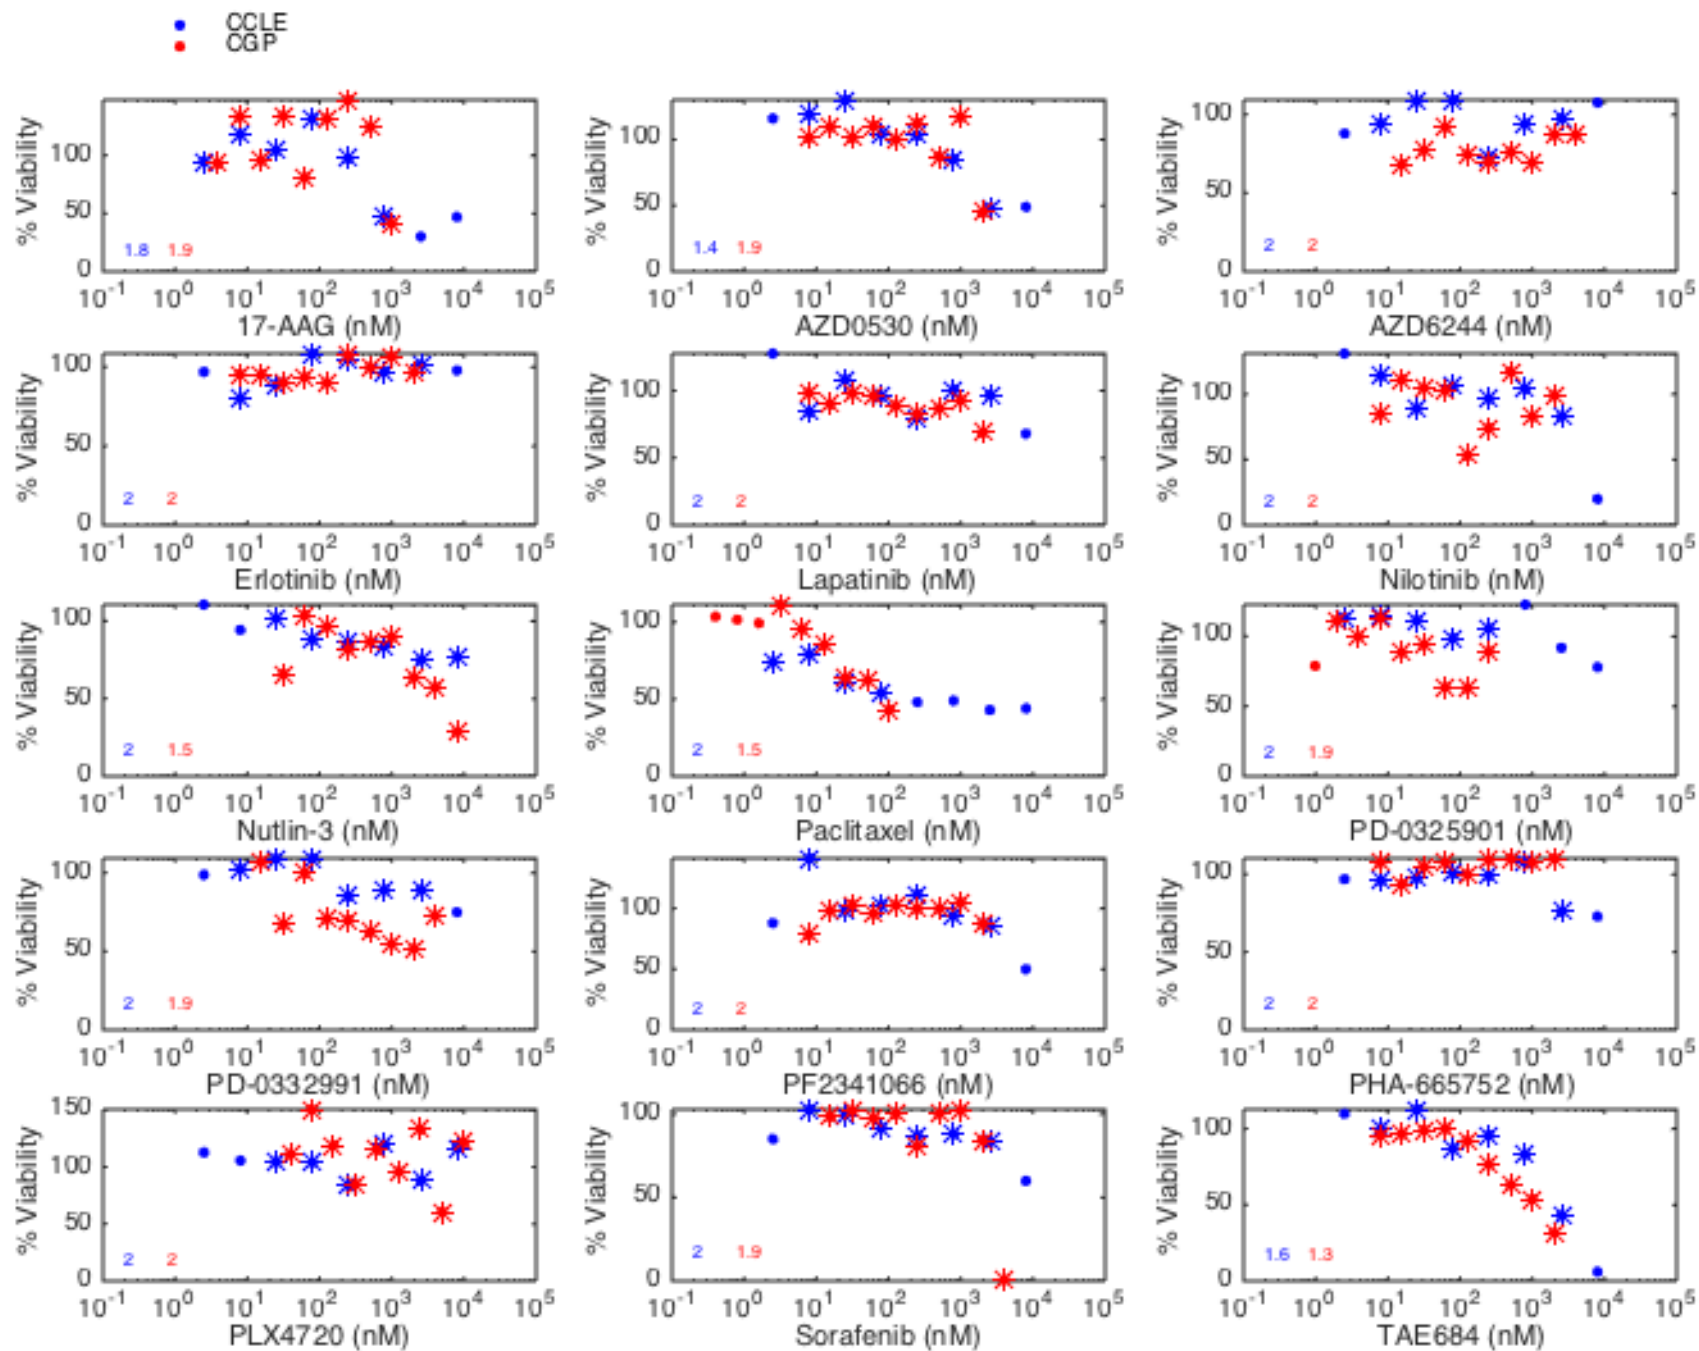

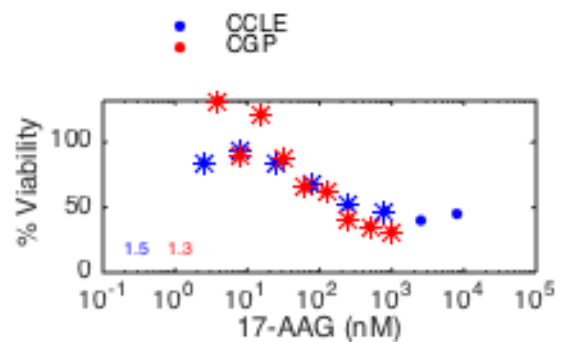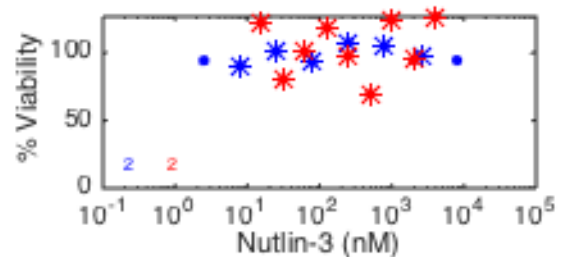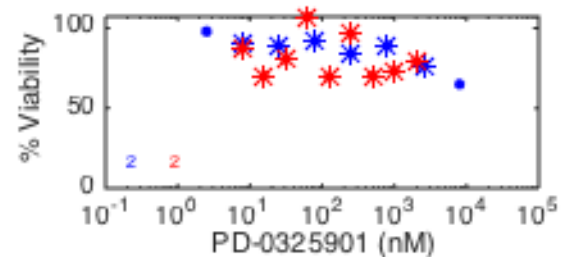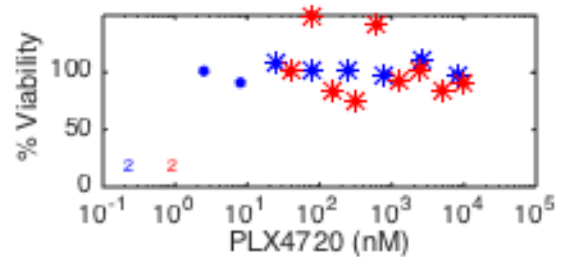

# JVM-3

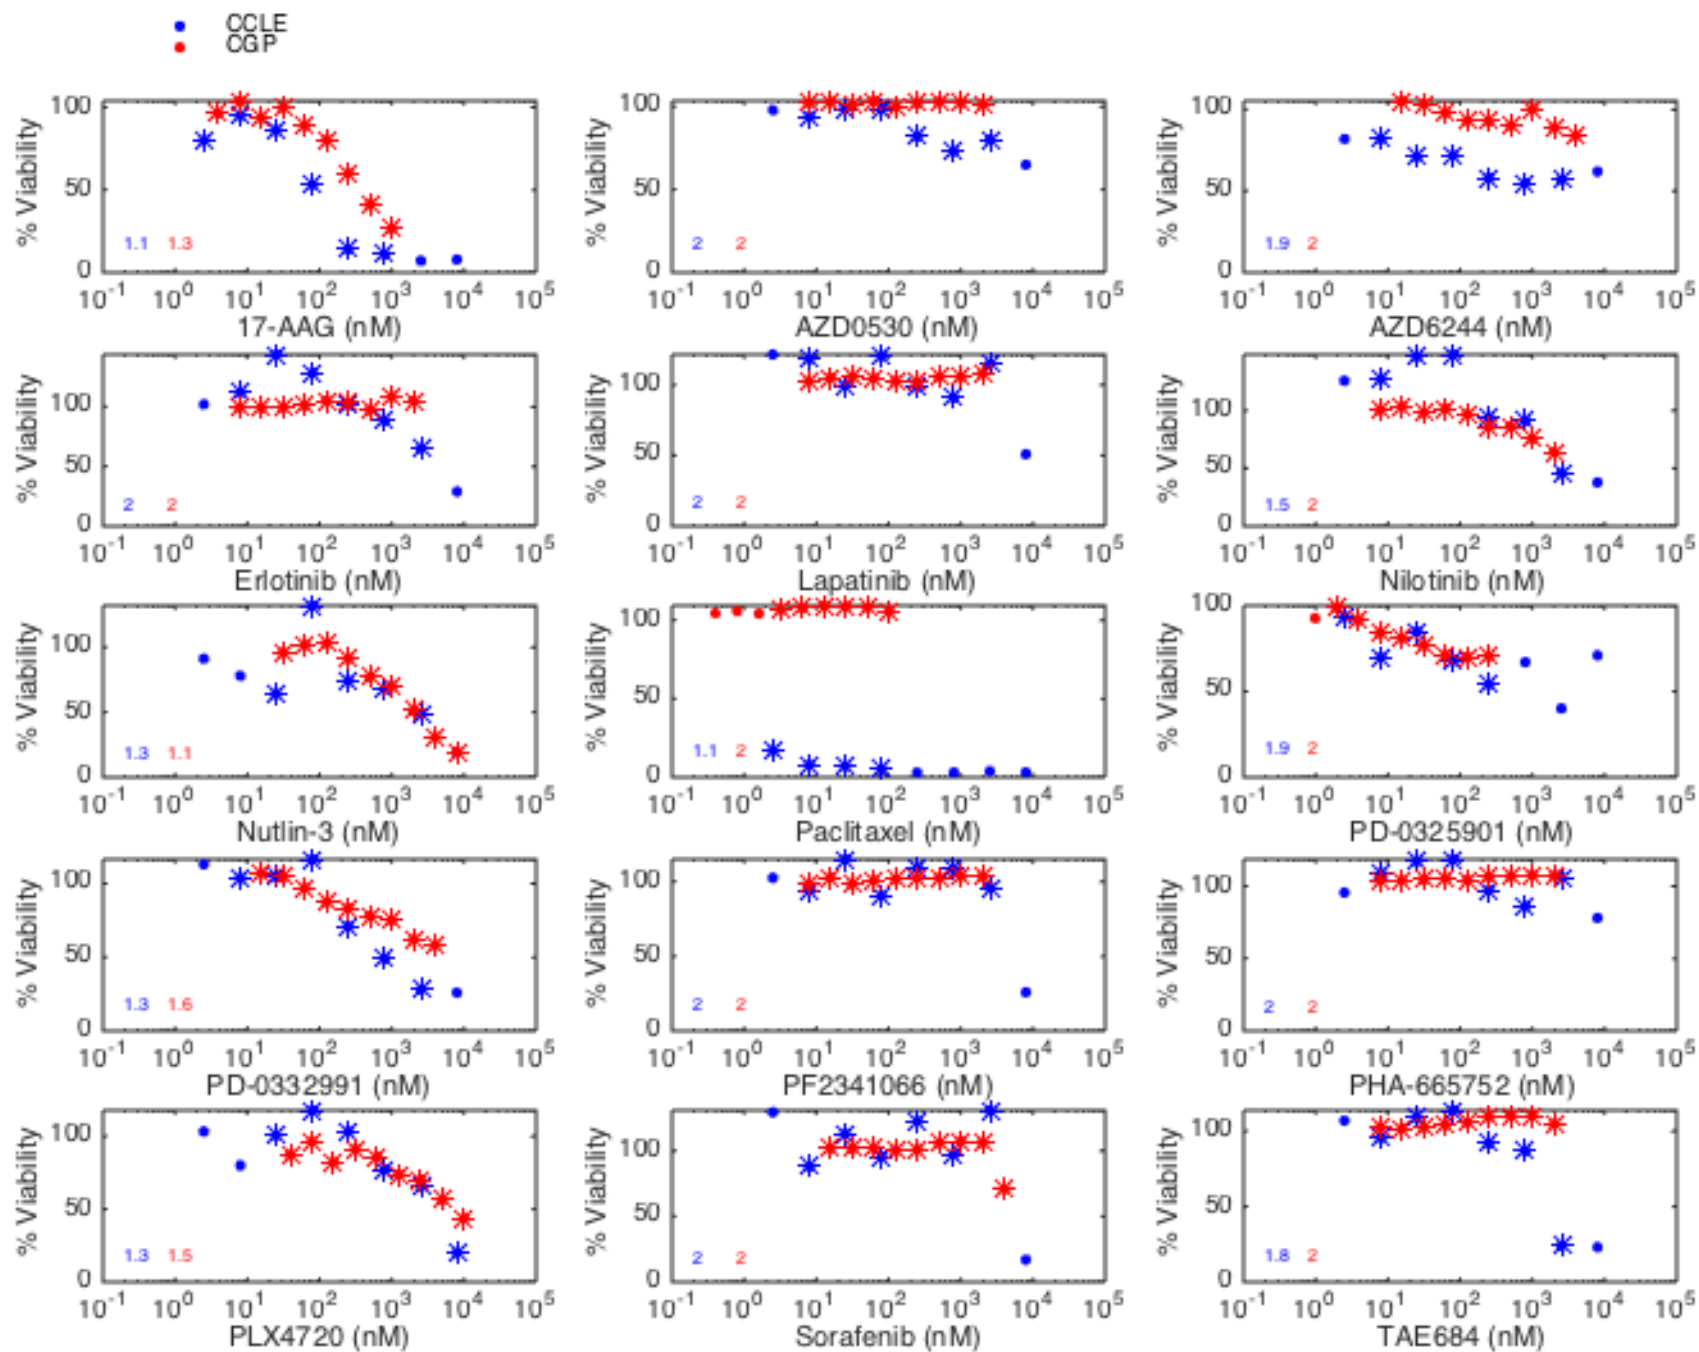

# K052

- CCLE
- CGP

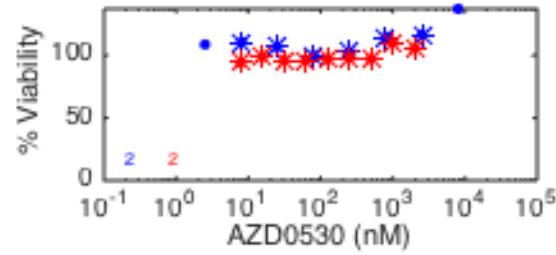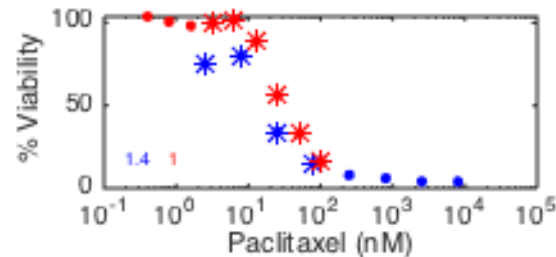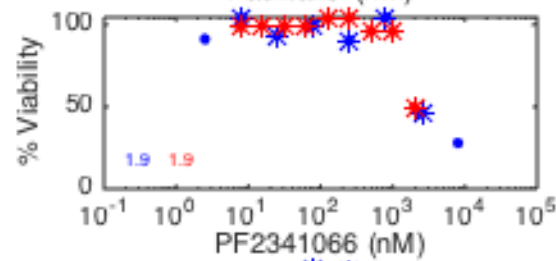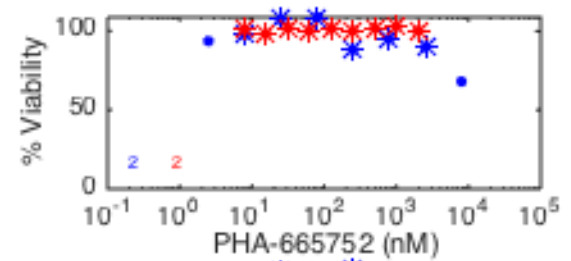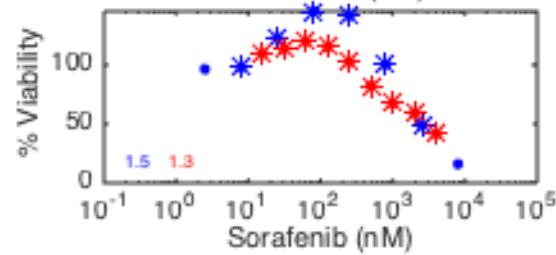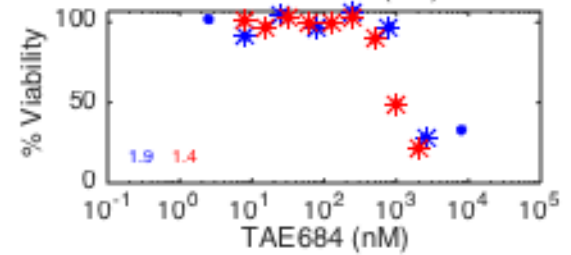

# KALS-1

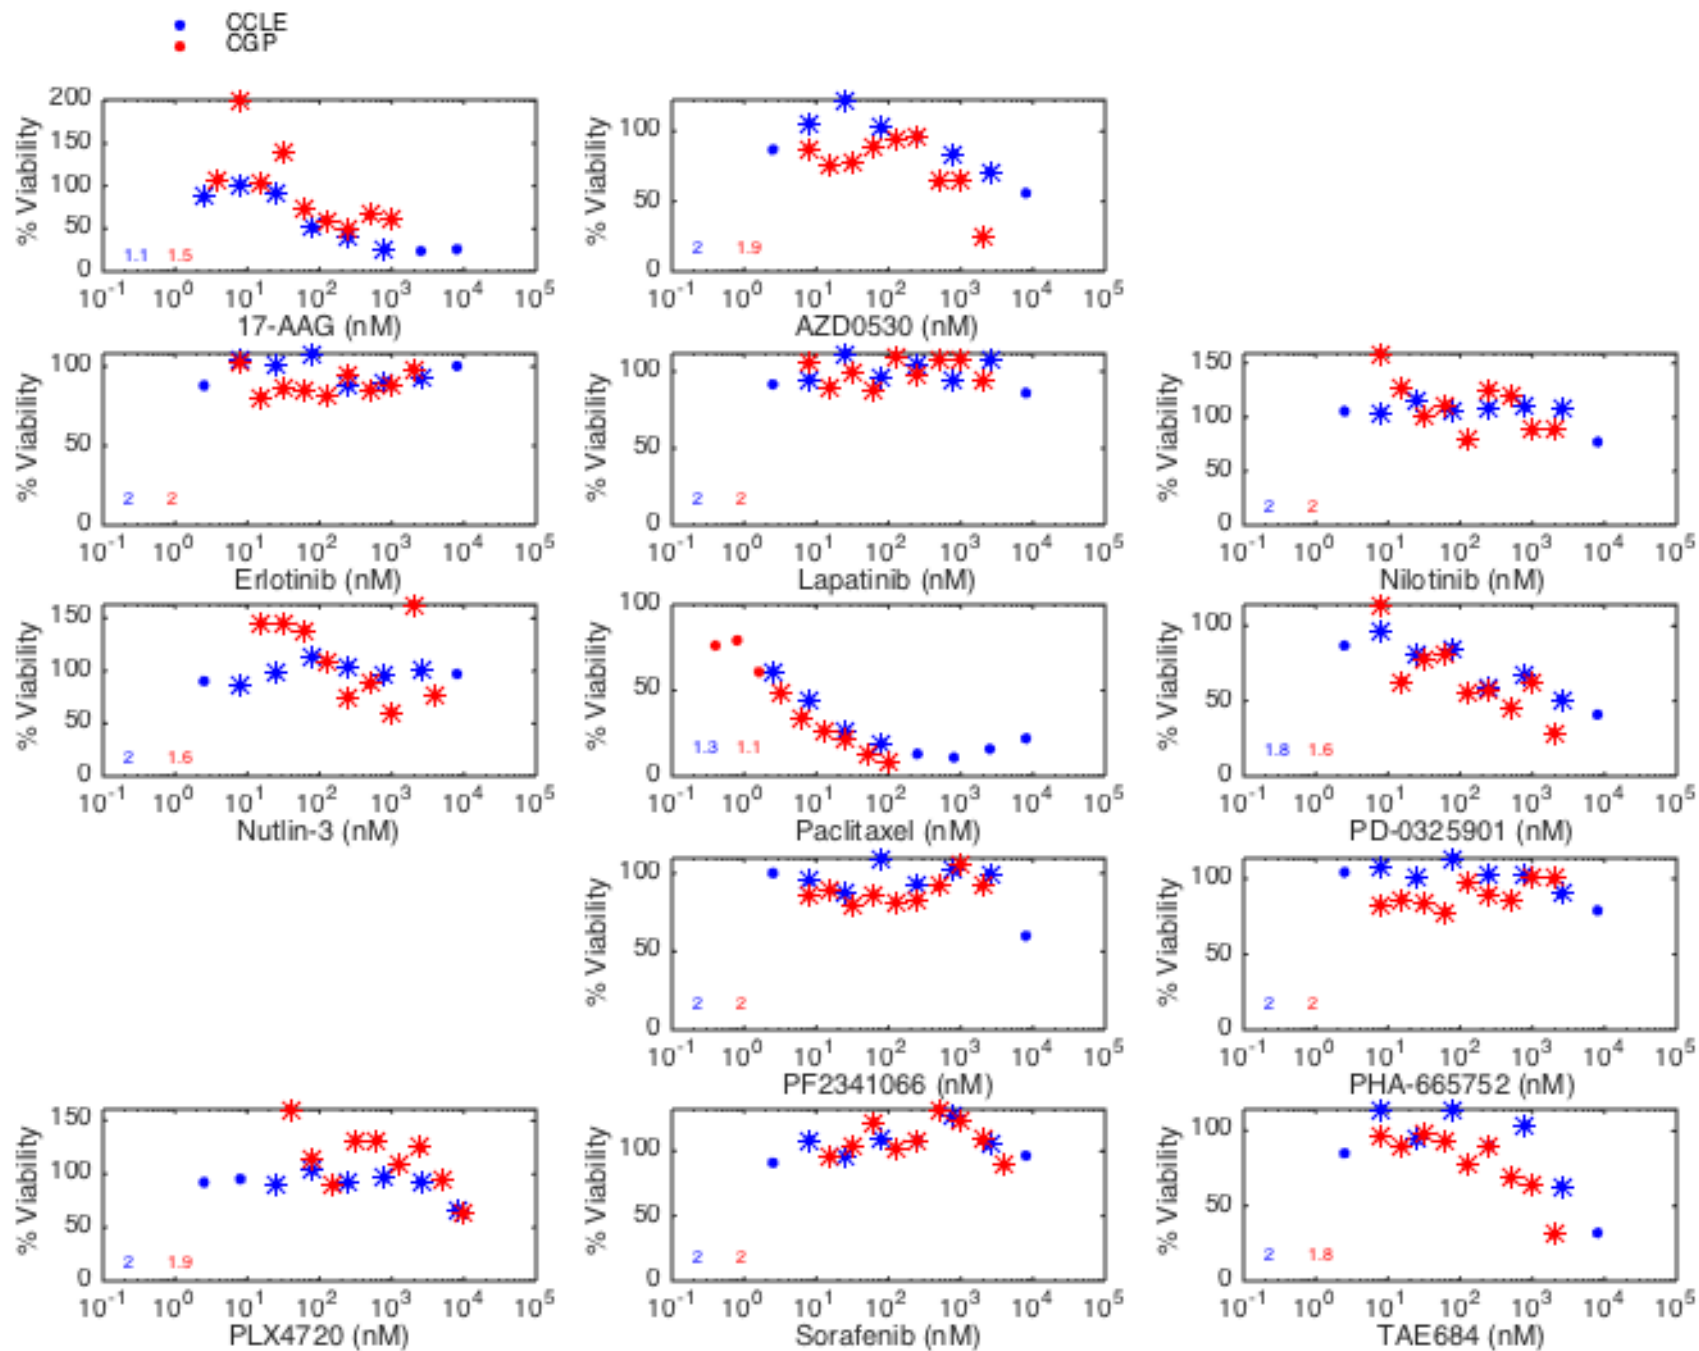

# KARPAS-299

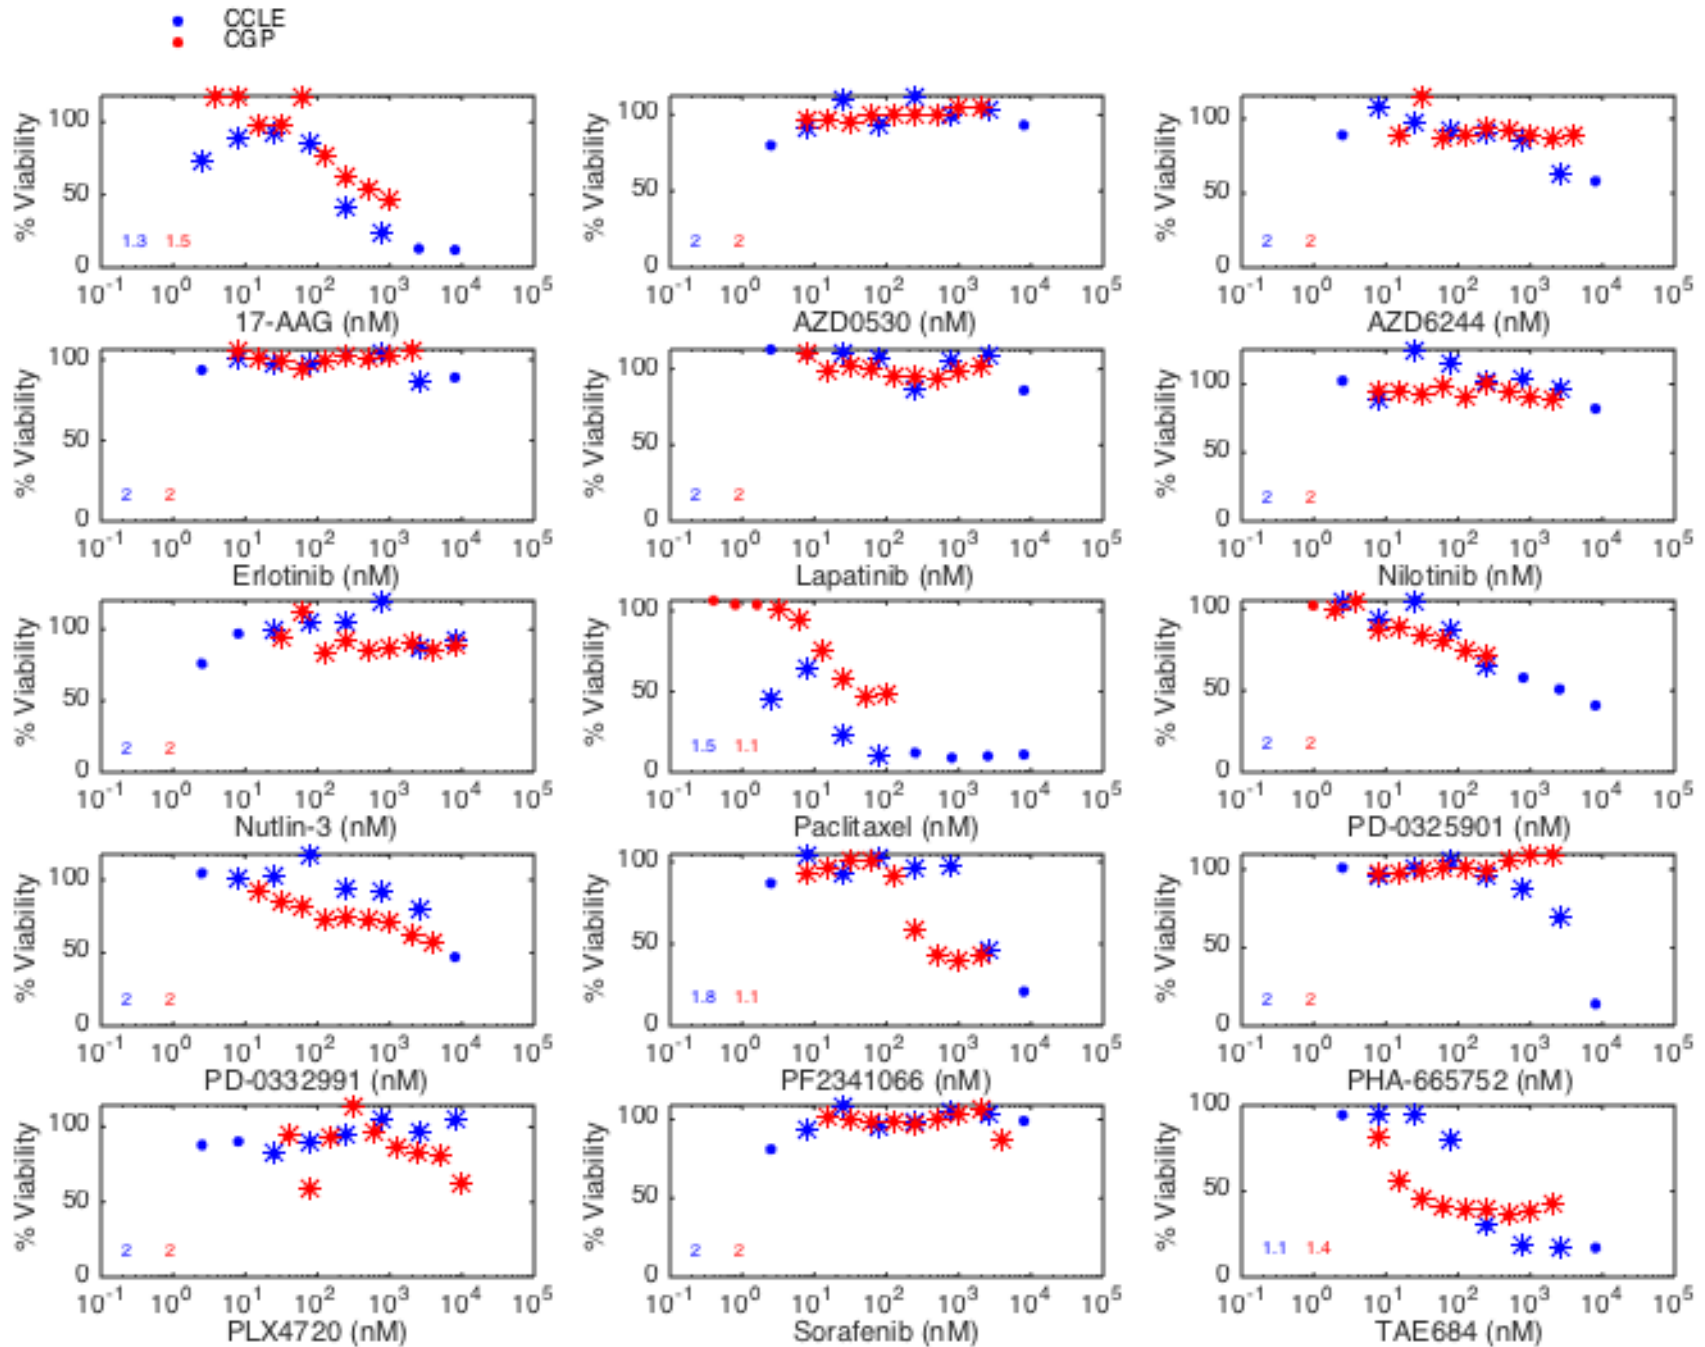



# KARPAS-422

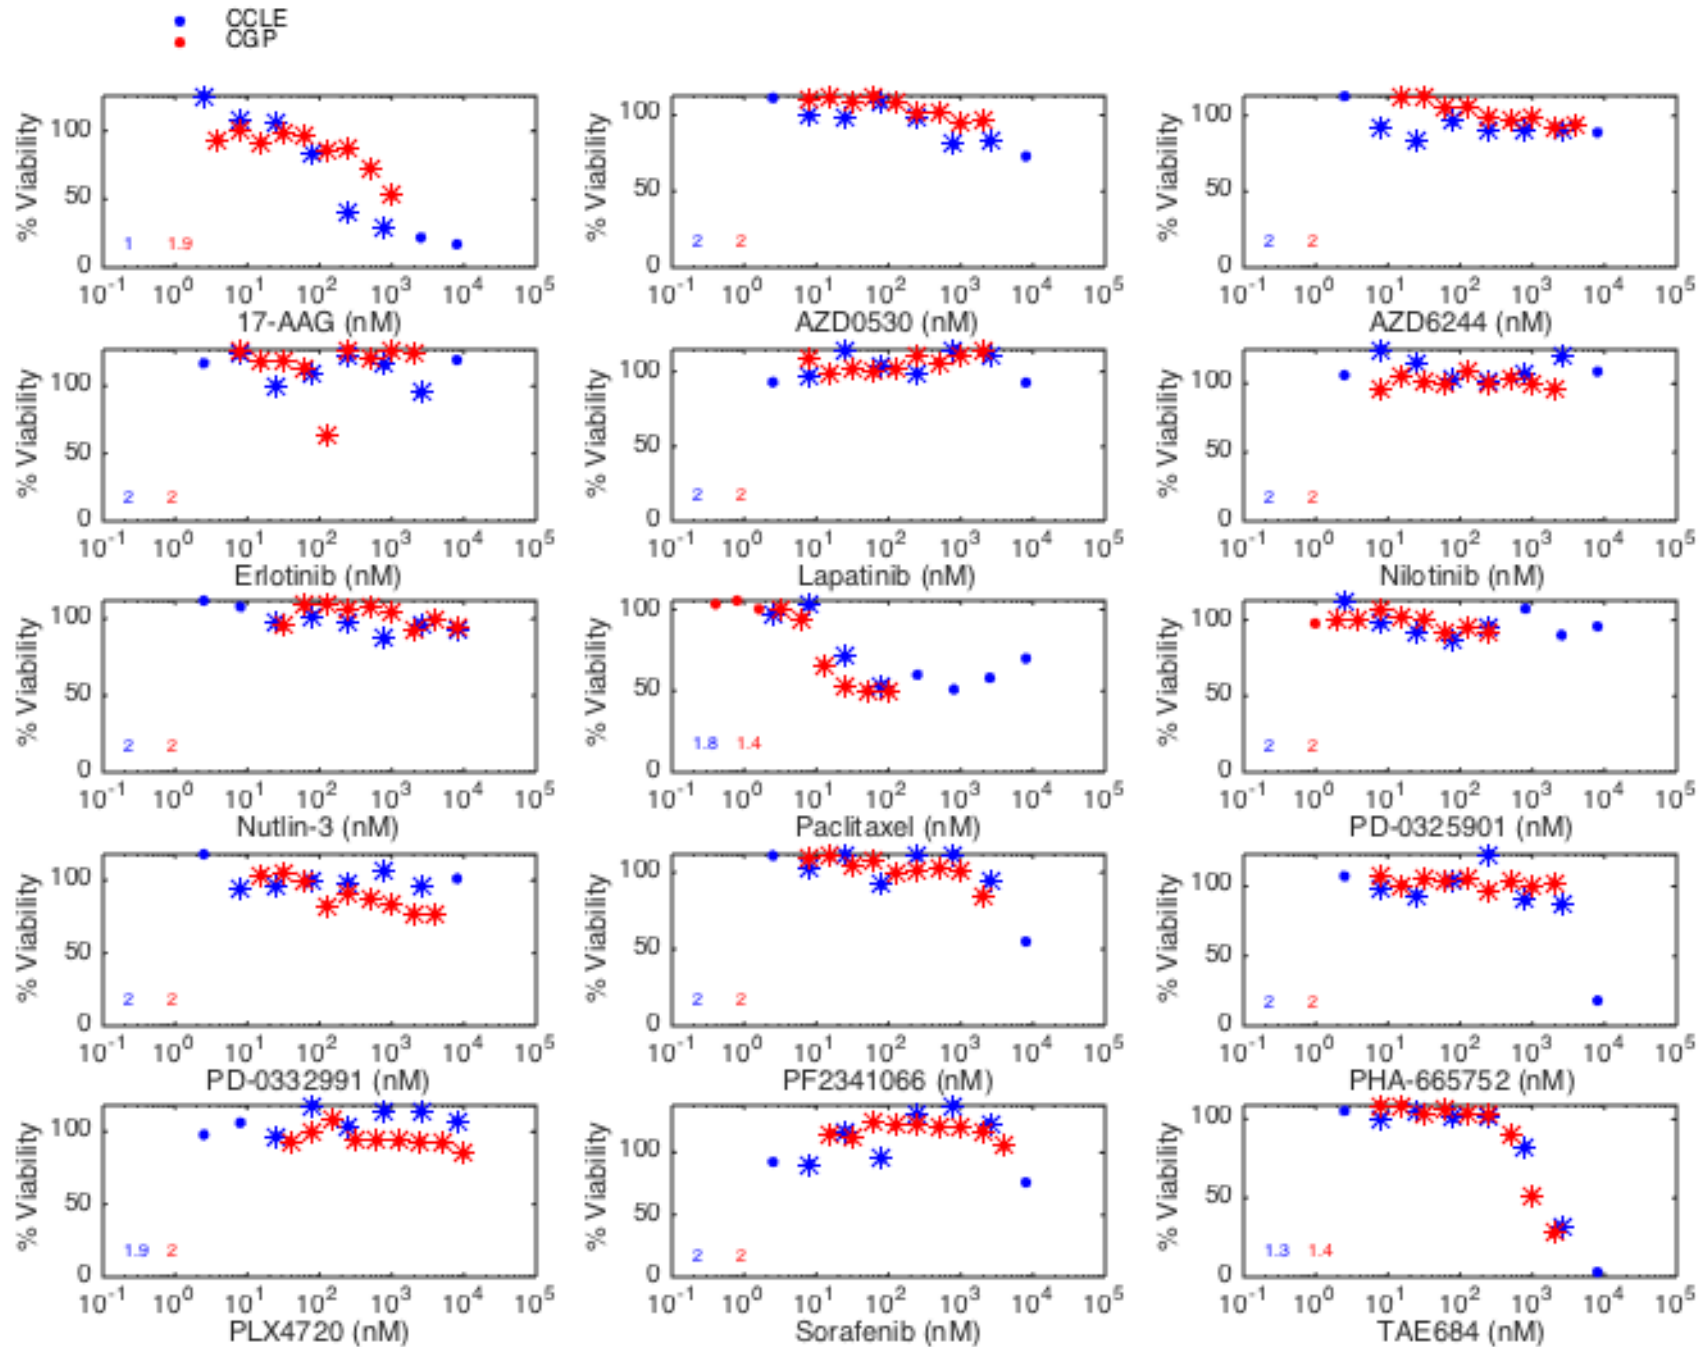



# KLE

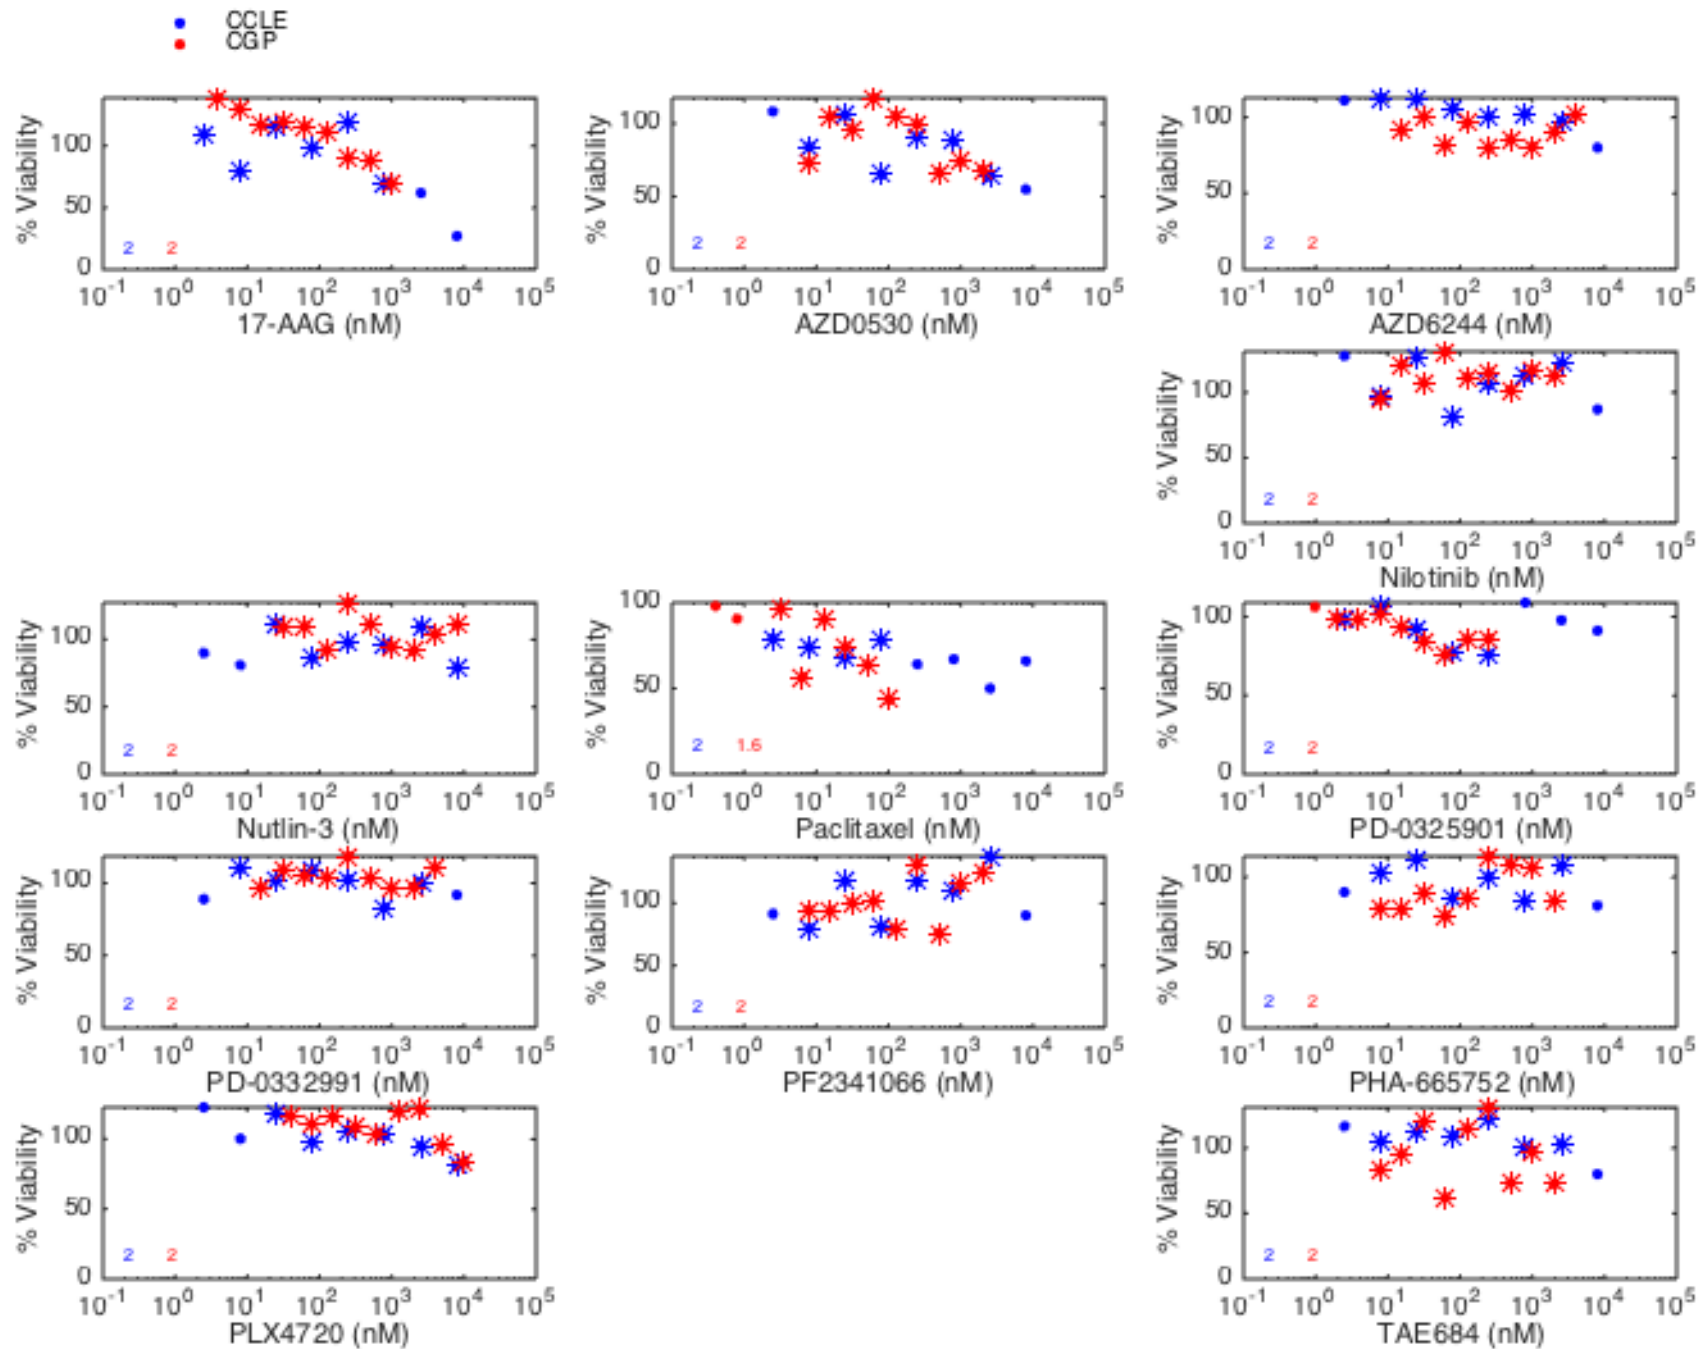

# KNS-42

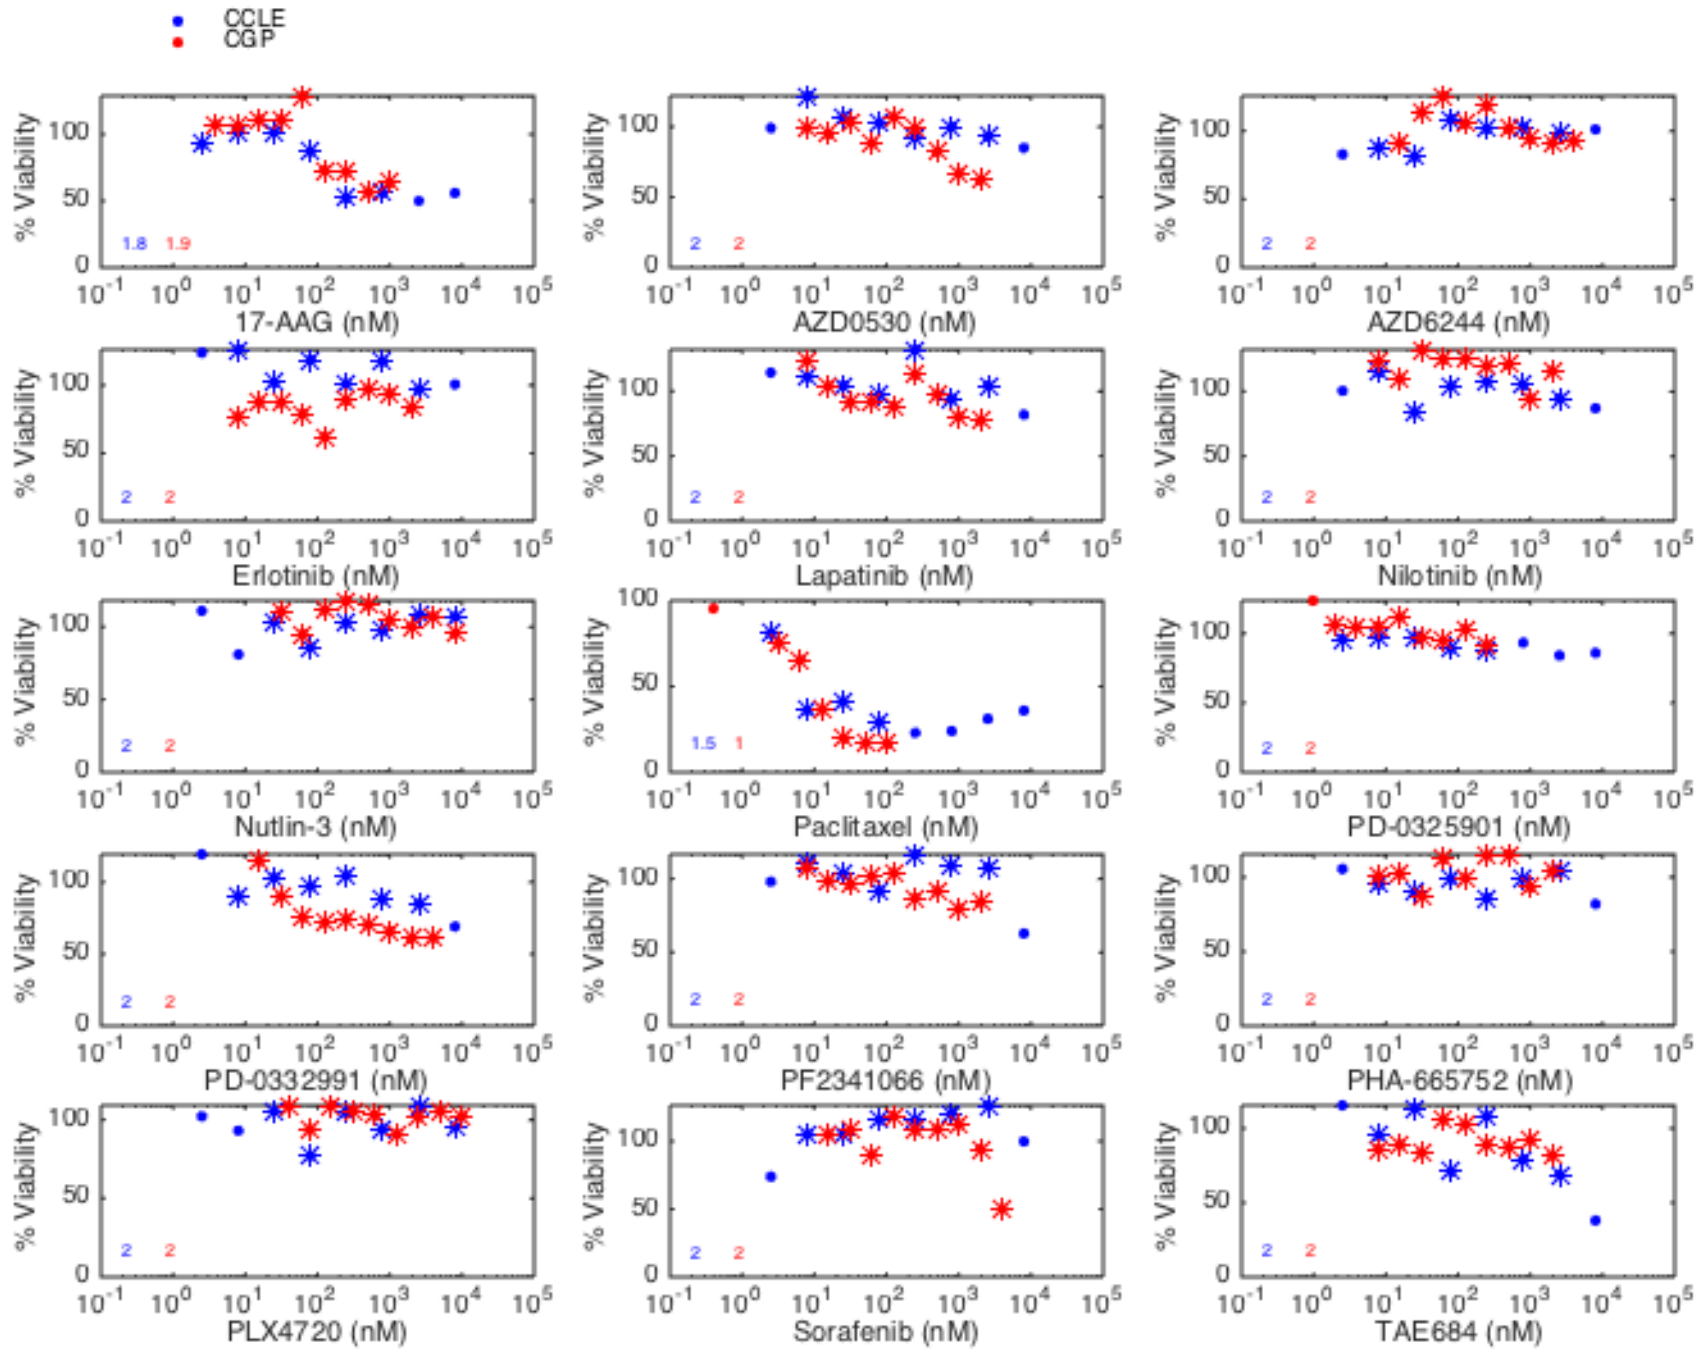

# KNS-62

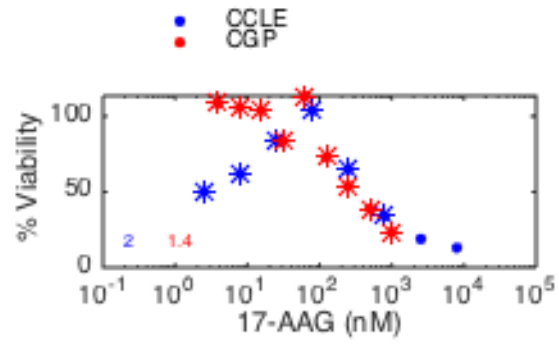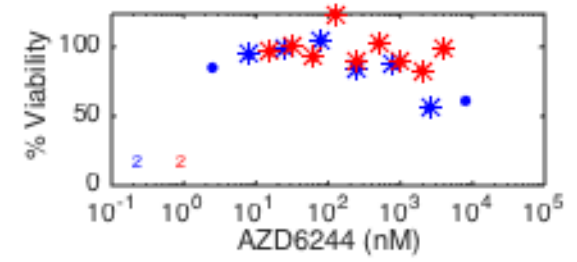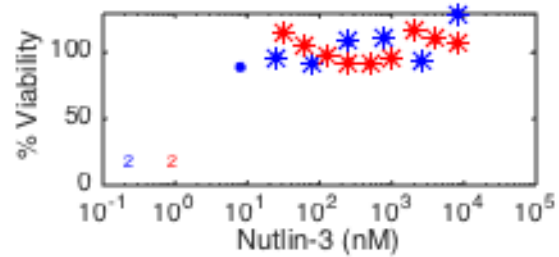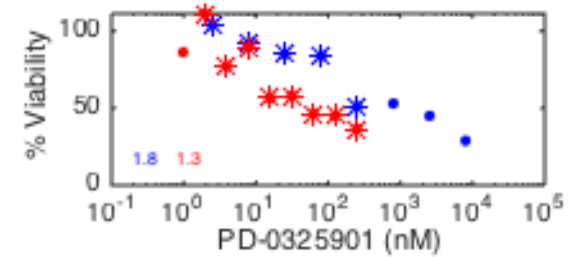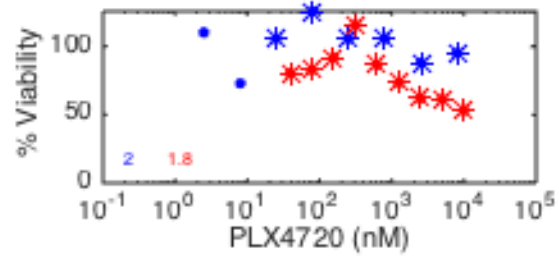

# KNS-81-FD

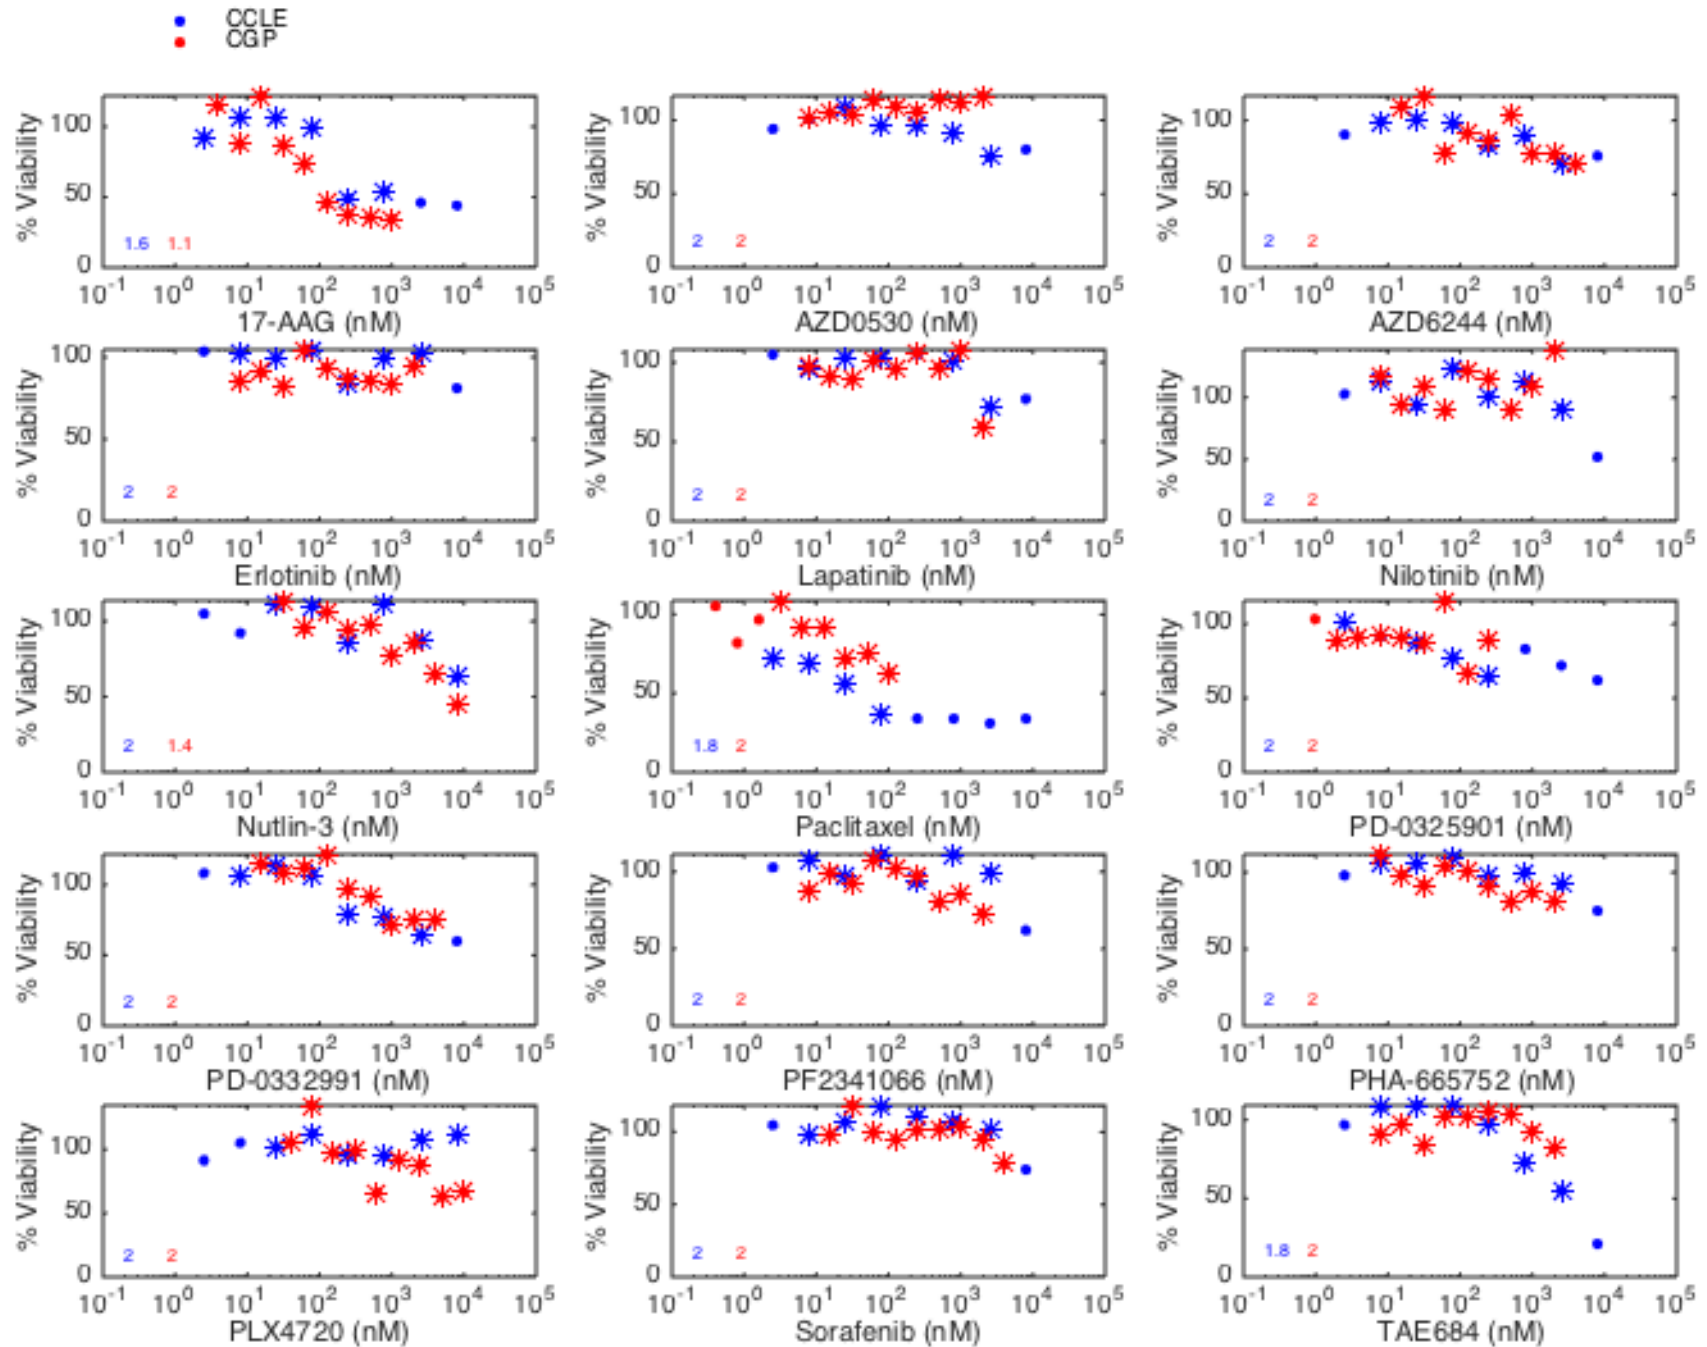

# KP-4

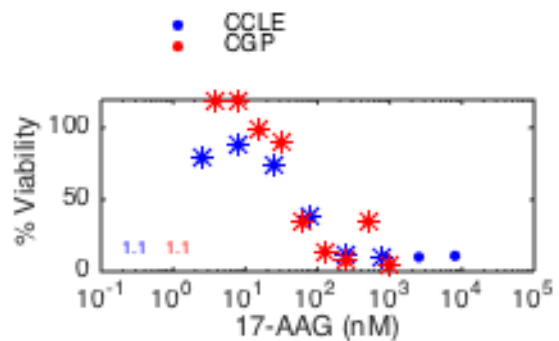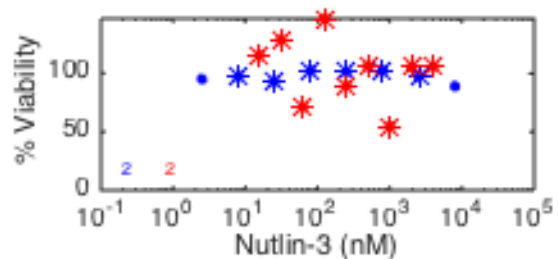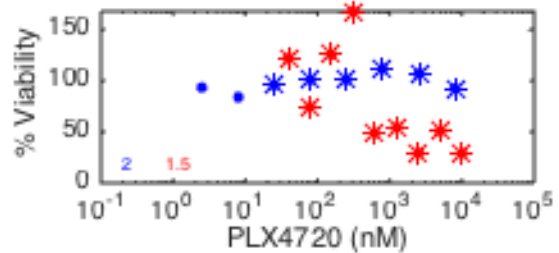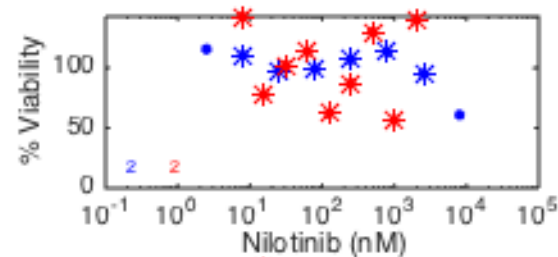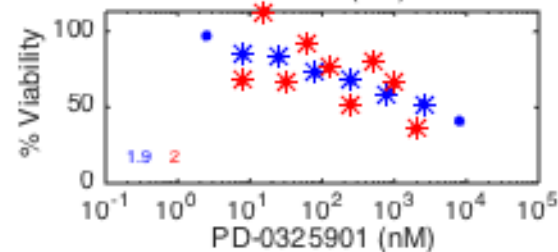

# KU812

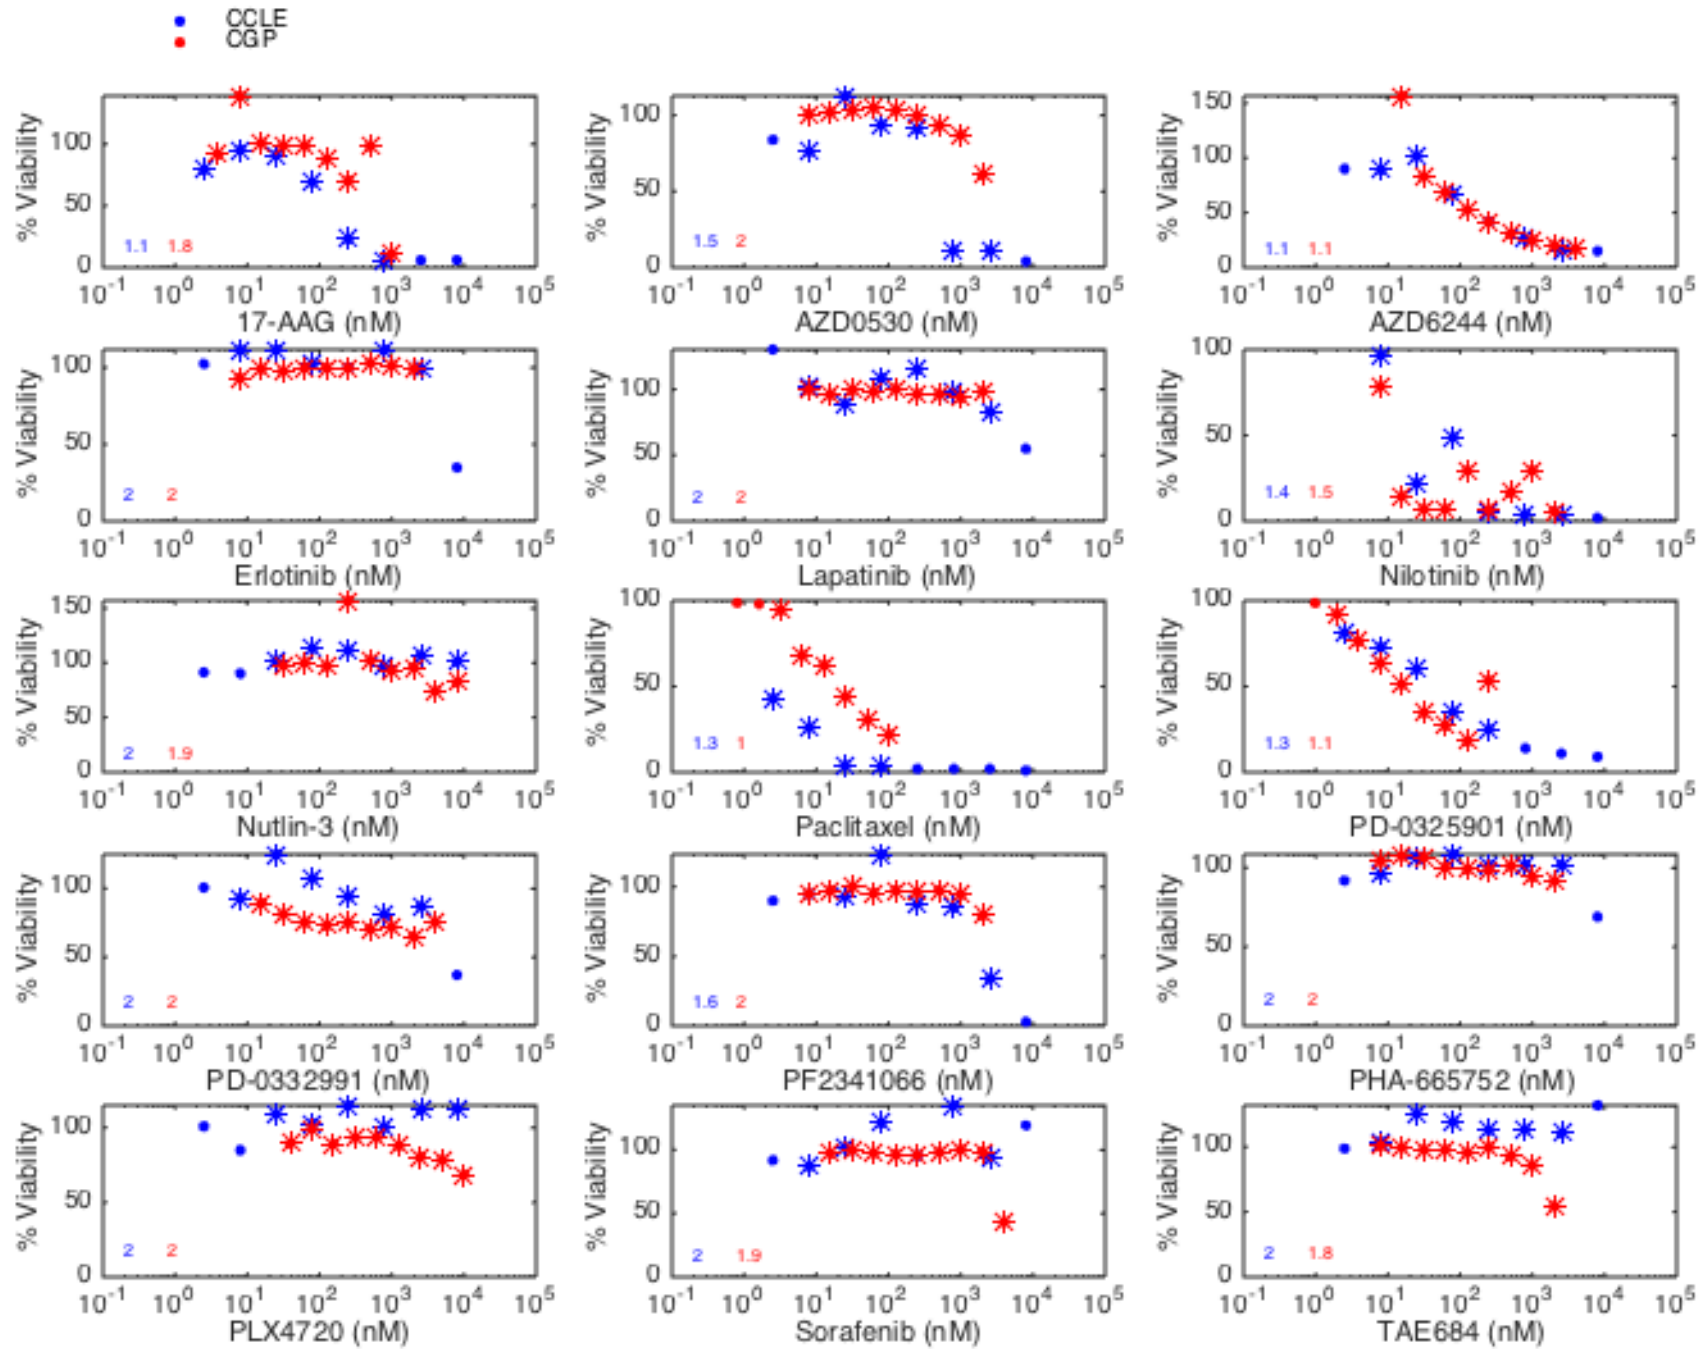



# KURAMOCHI

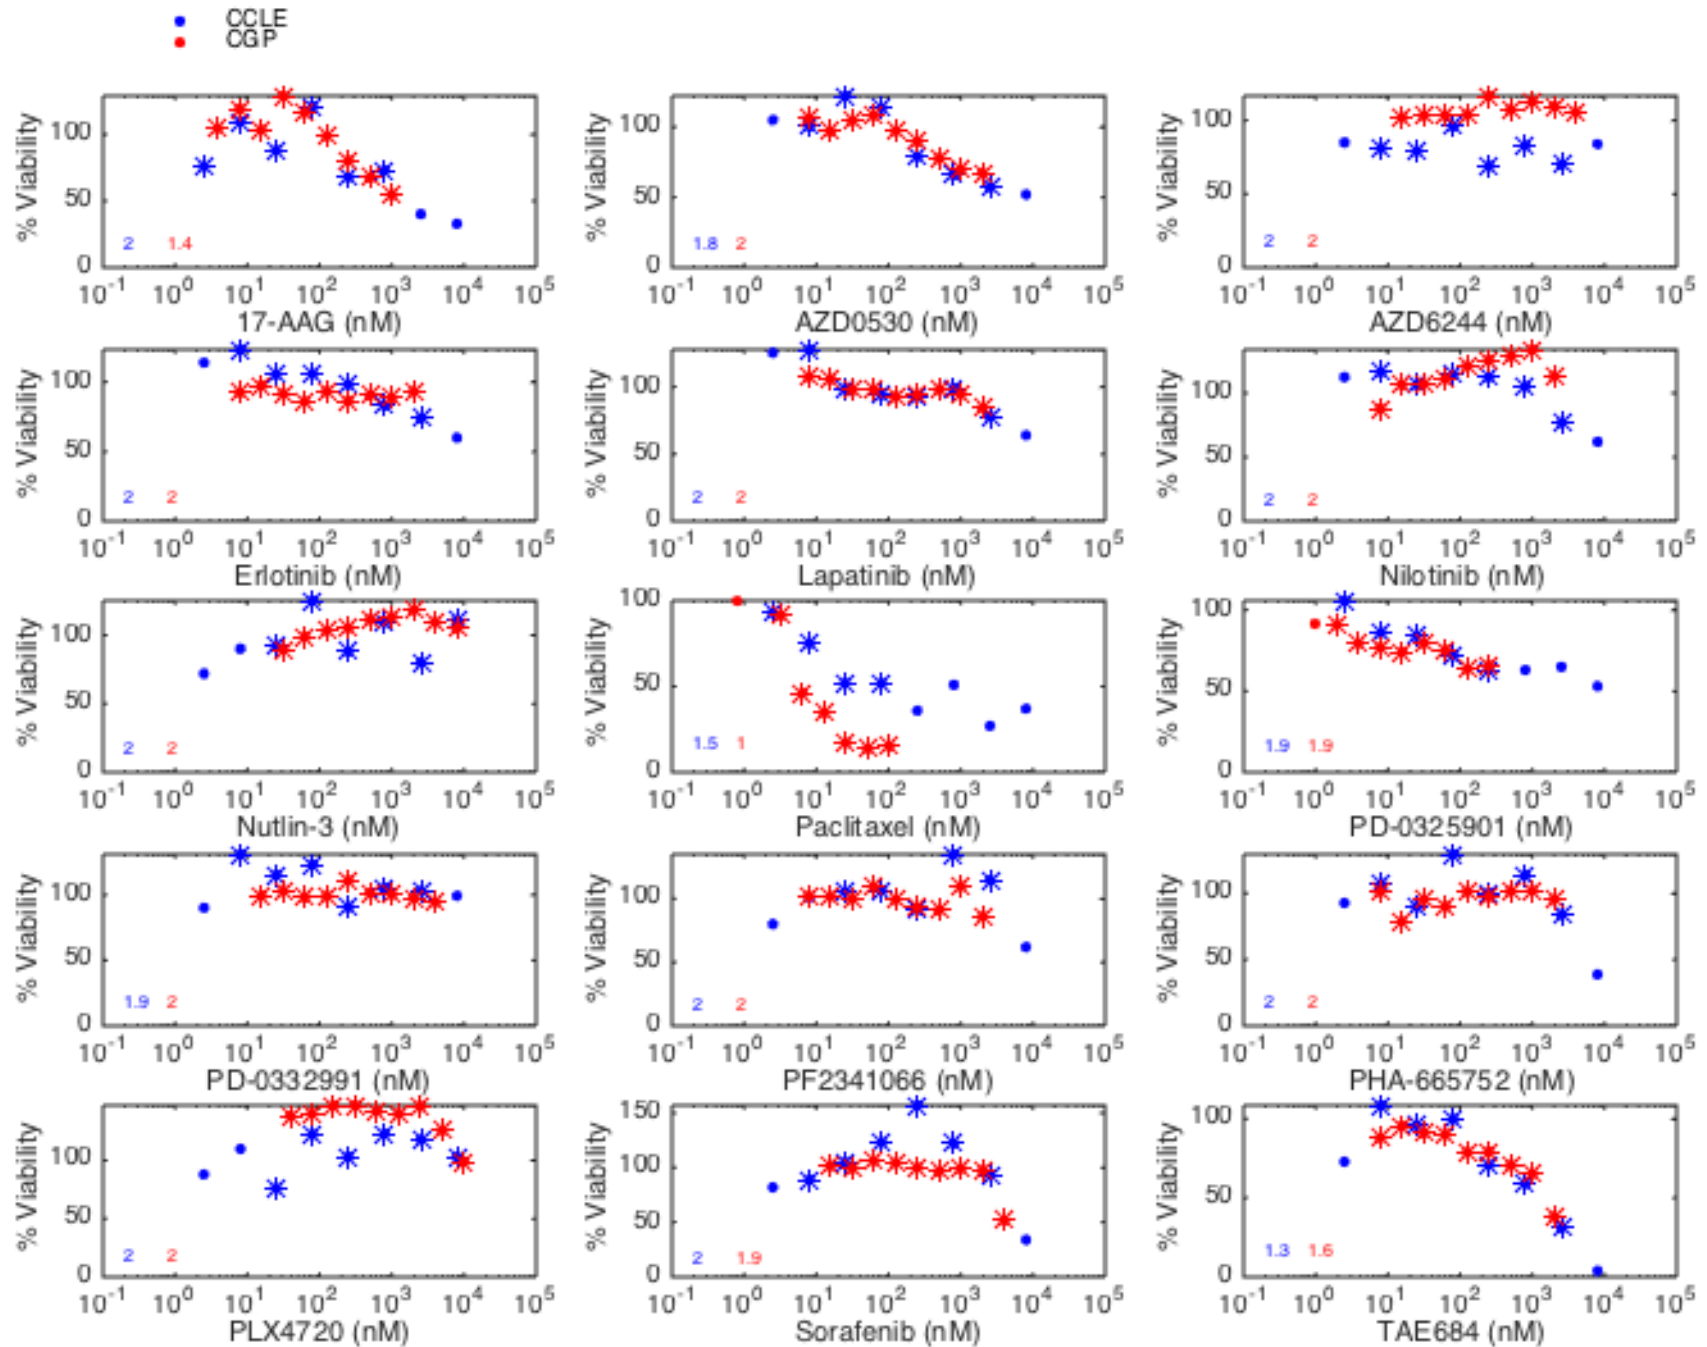

# KYSE-70

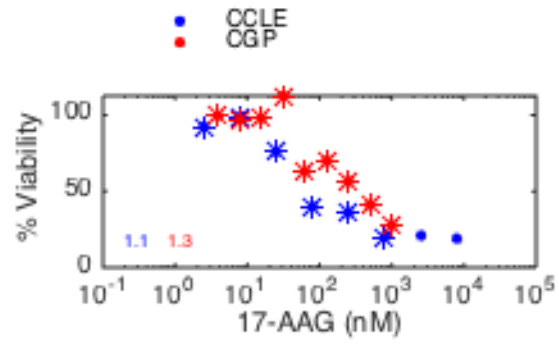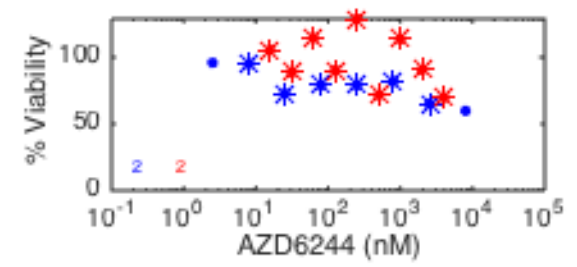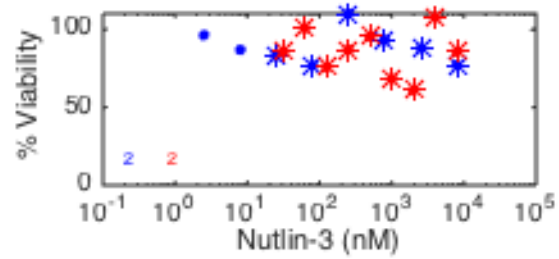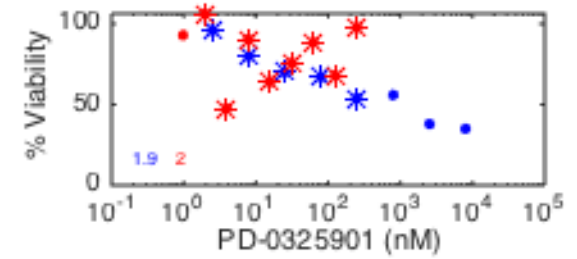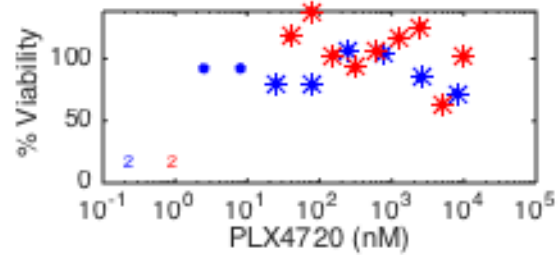

KYSE-140

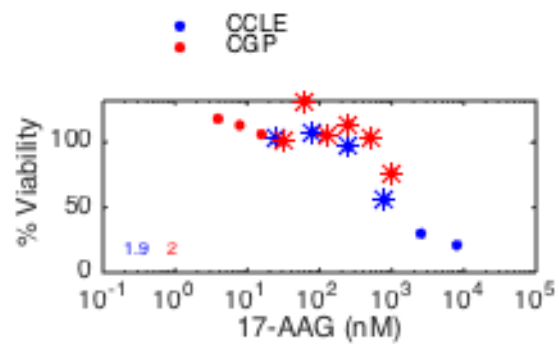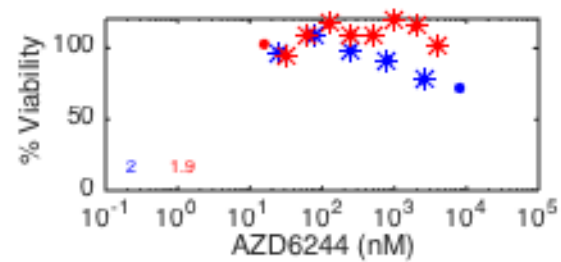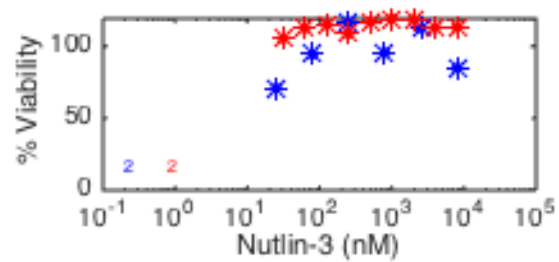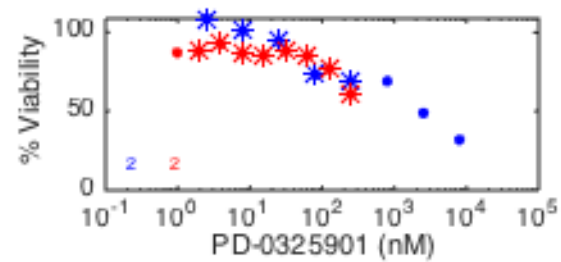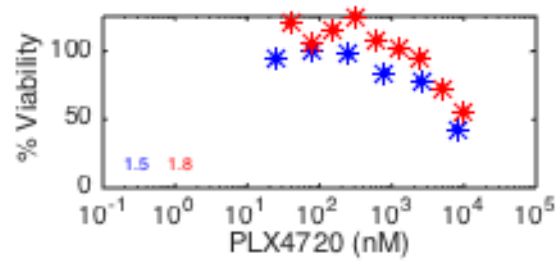

# KYSE-150

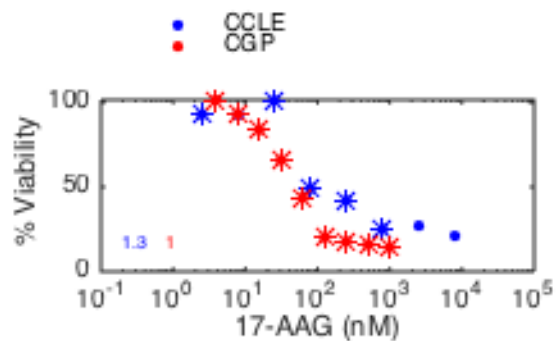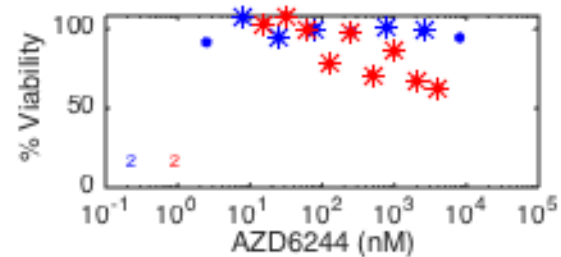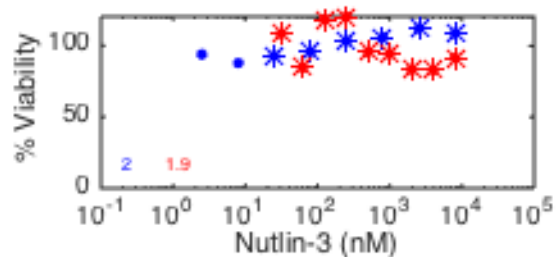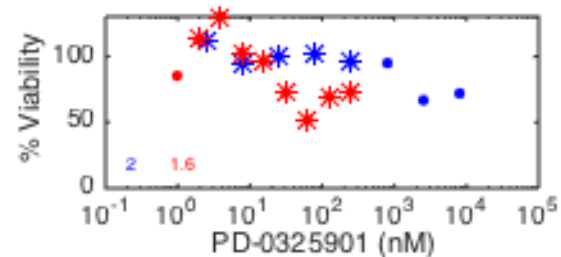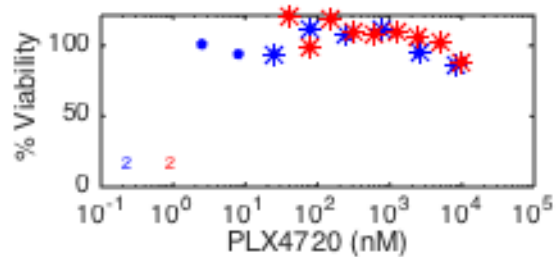

# KYSE-180

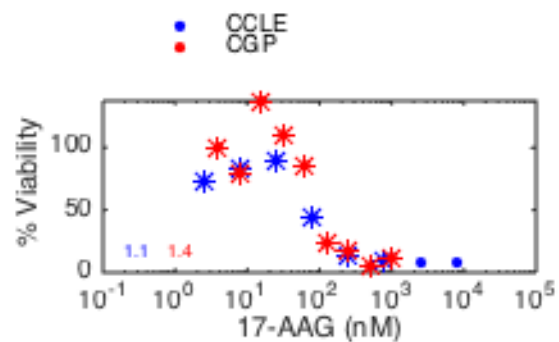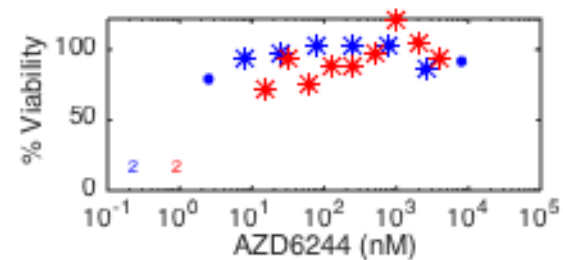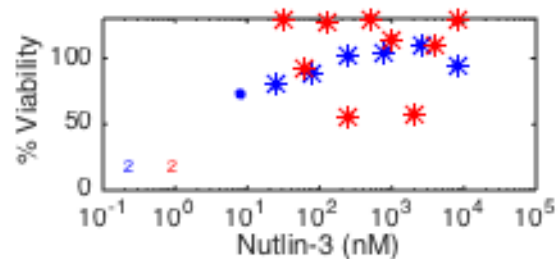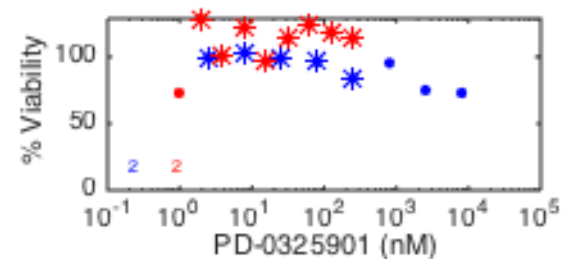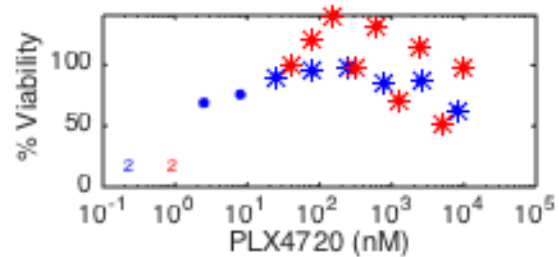

KYSE-410

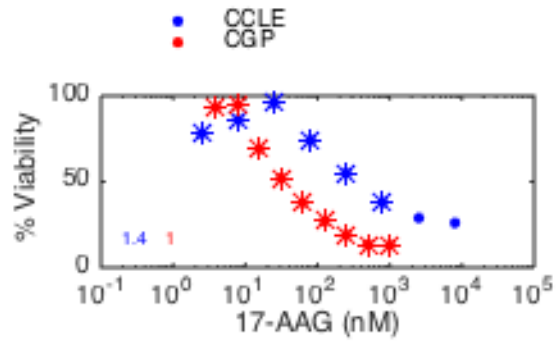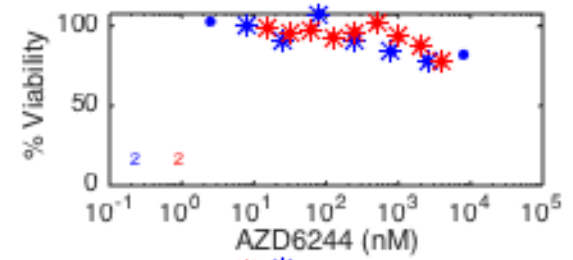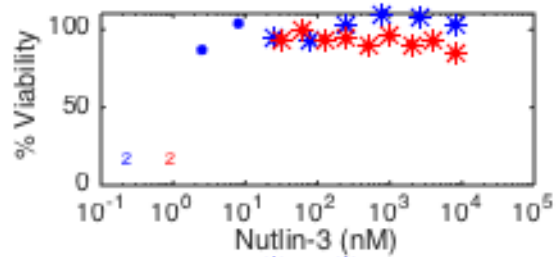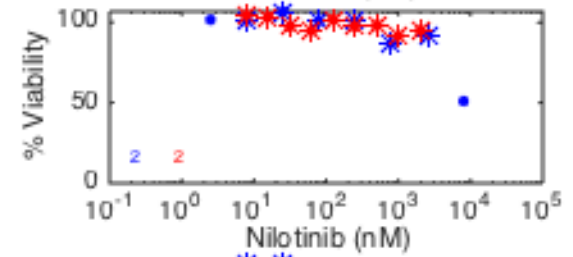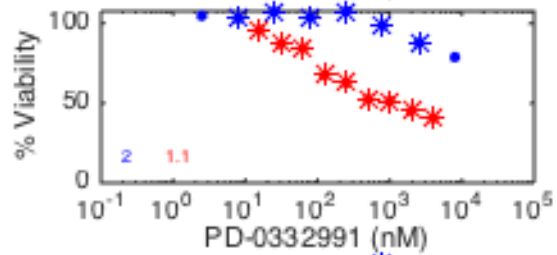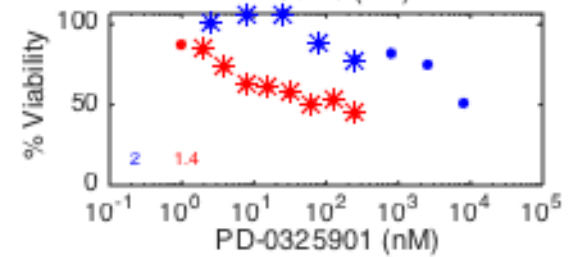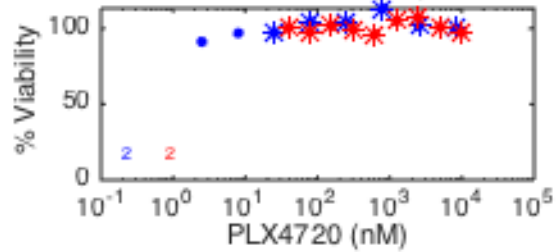

# KYSE-450

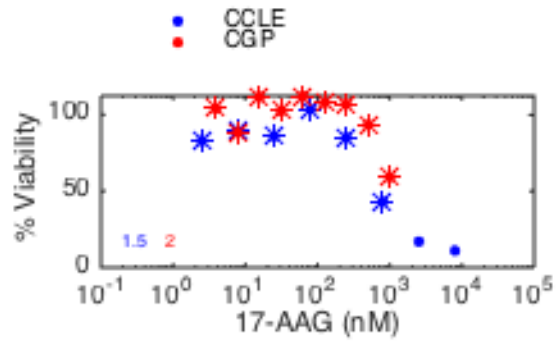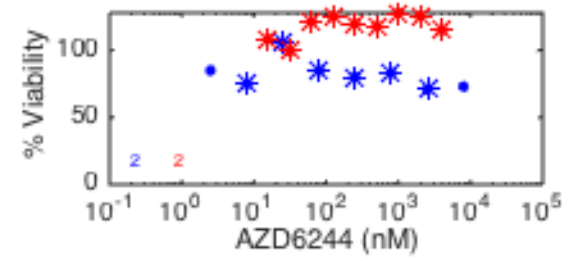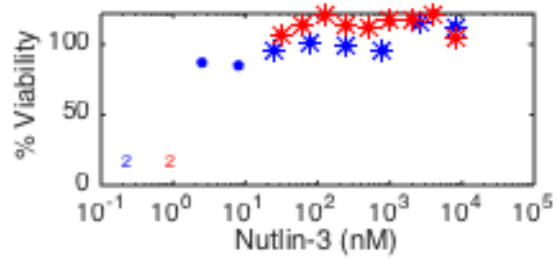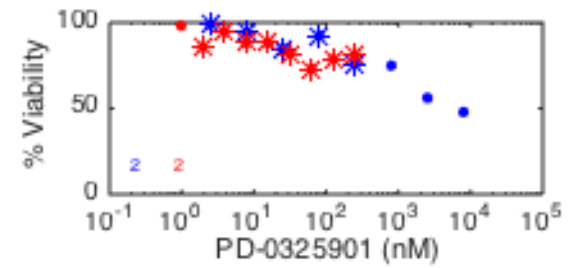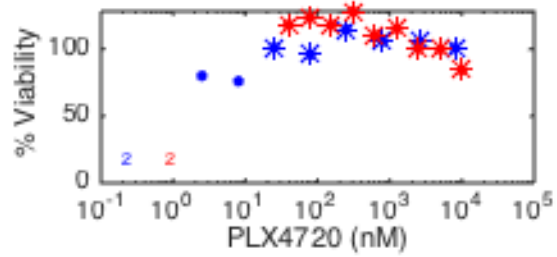

# KYSE-510

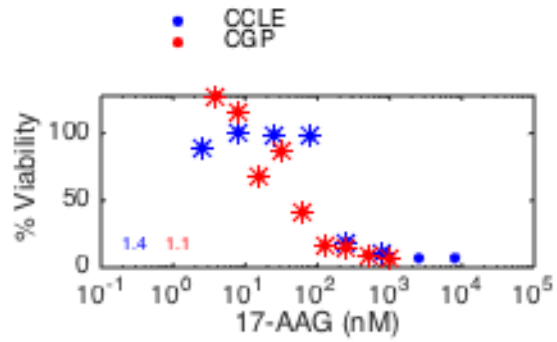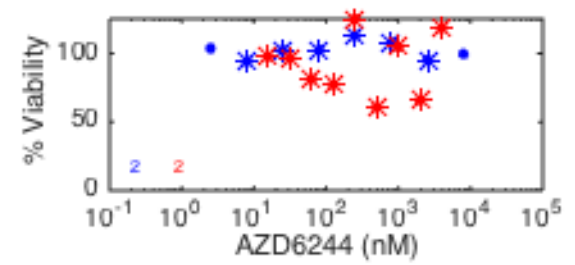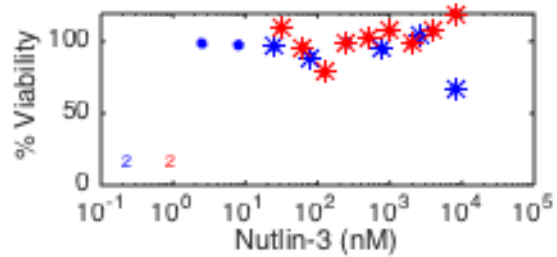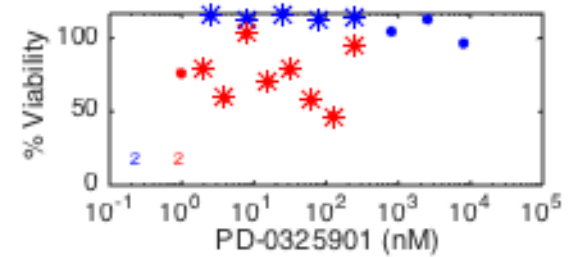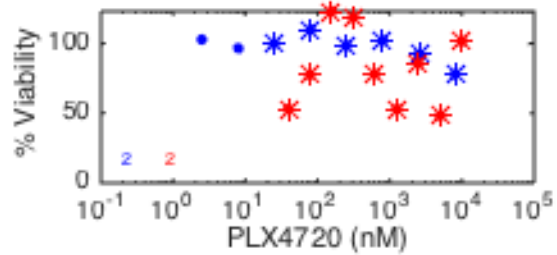



KYSE-520

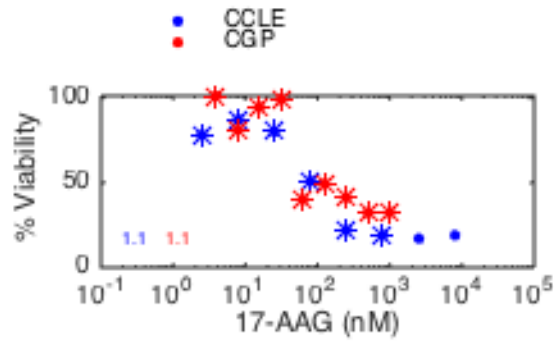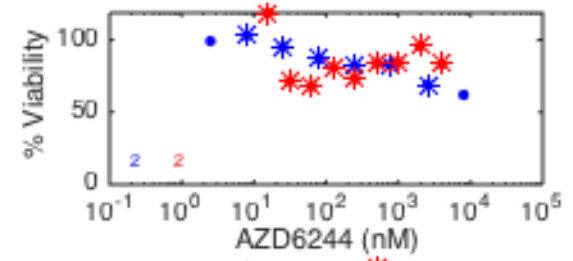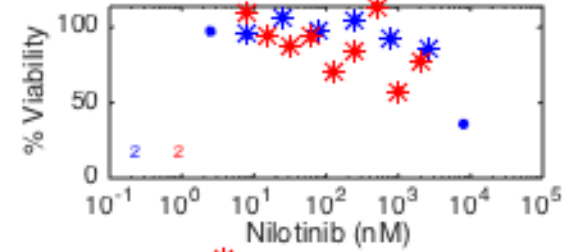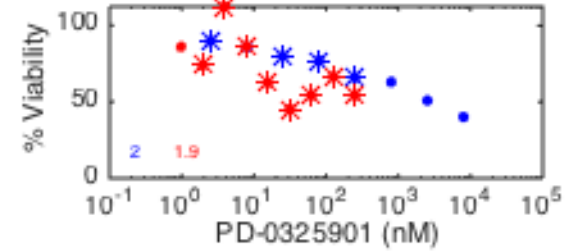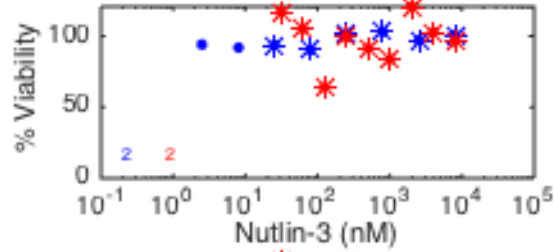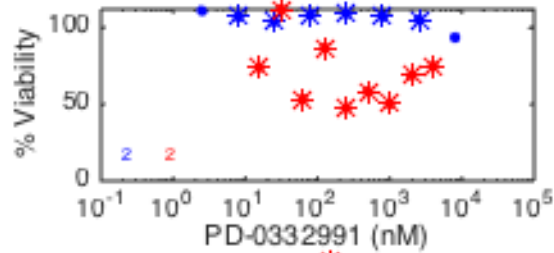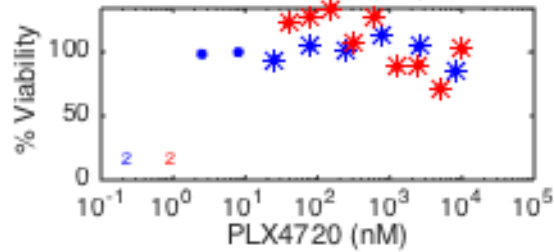

L-363

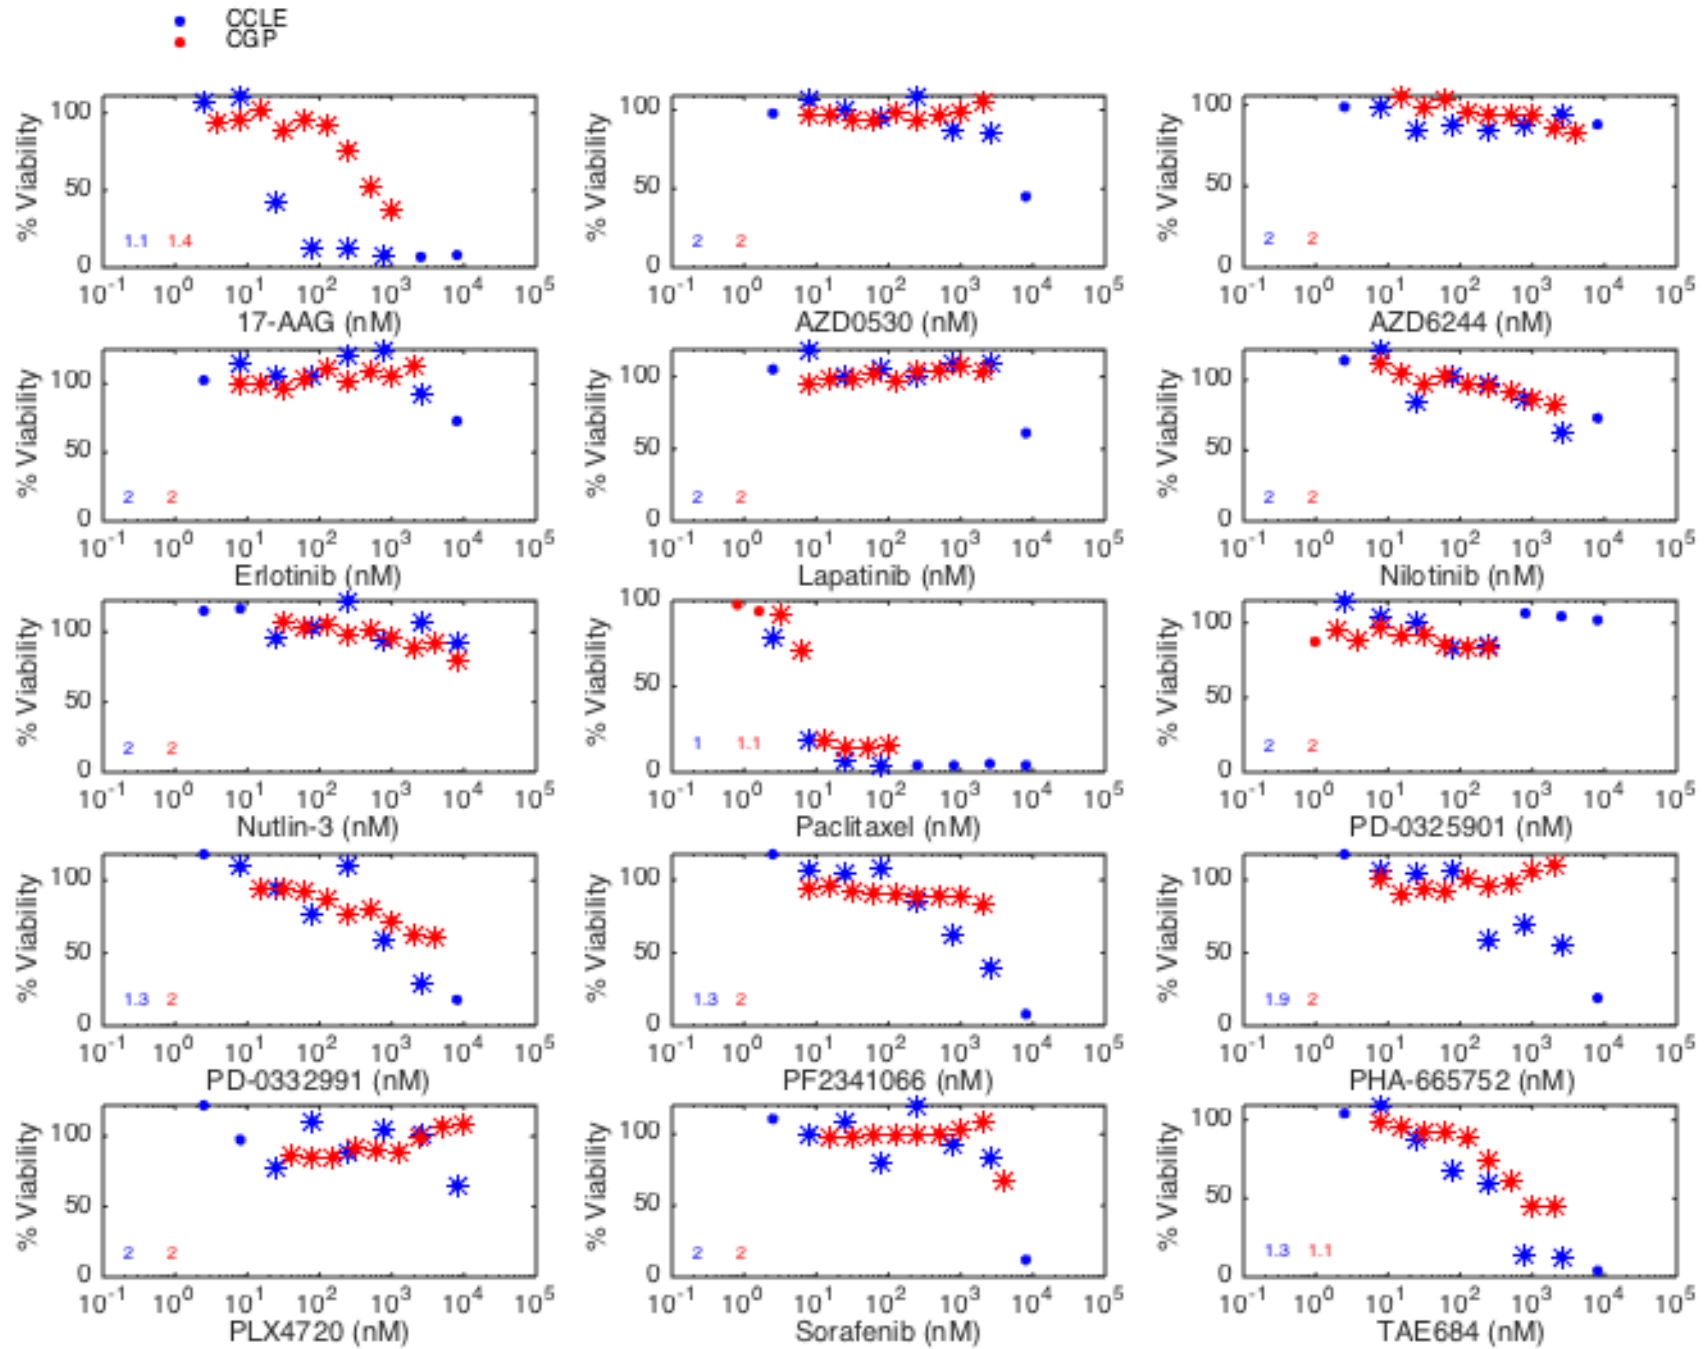

L-428

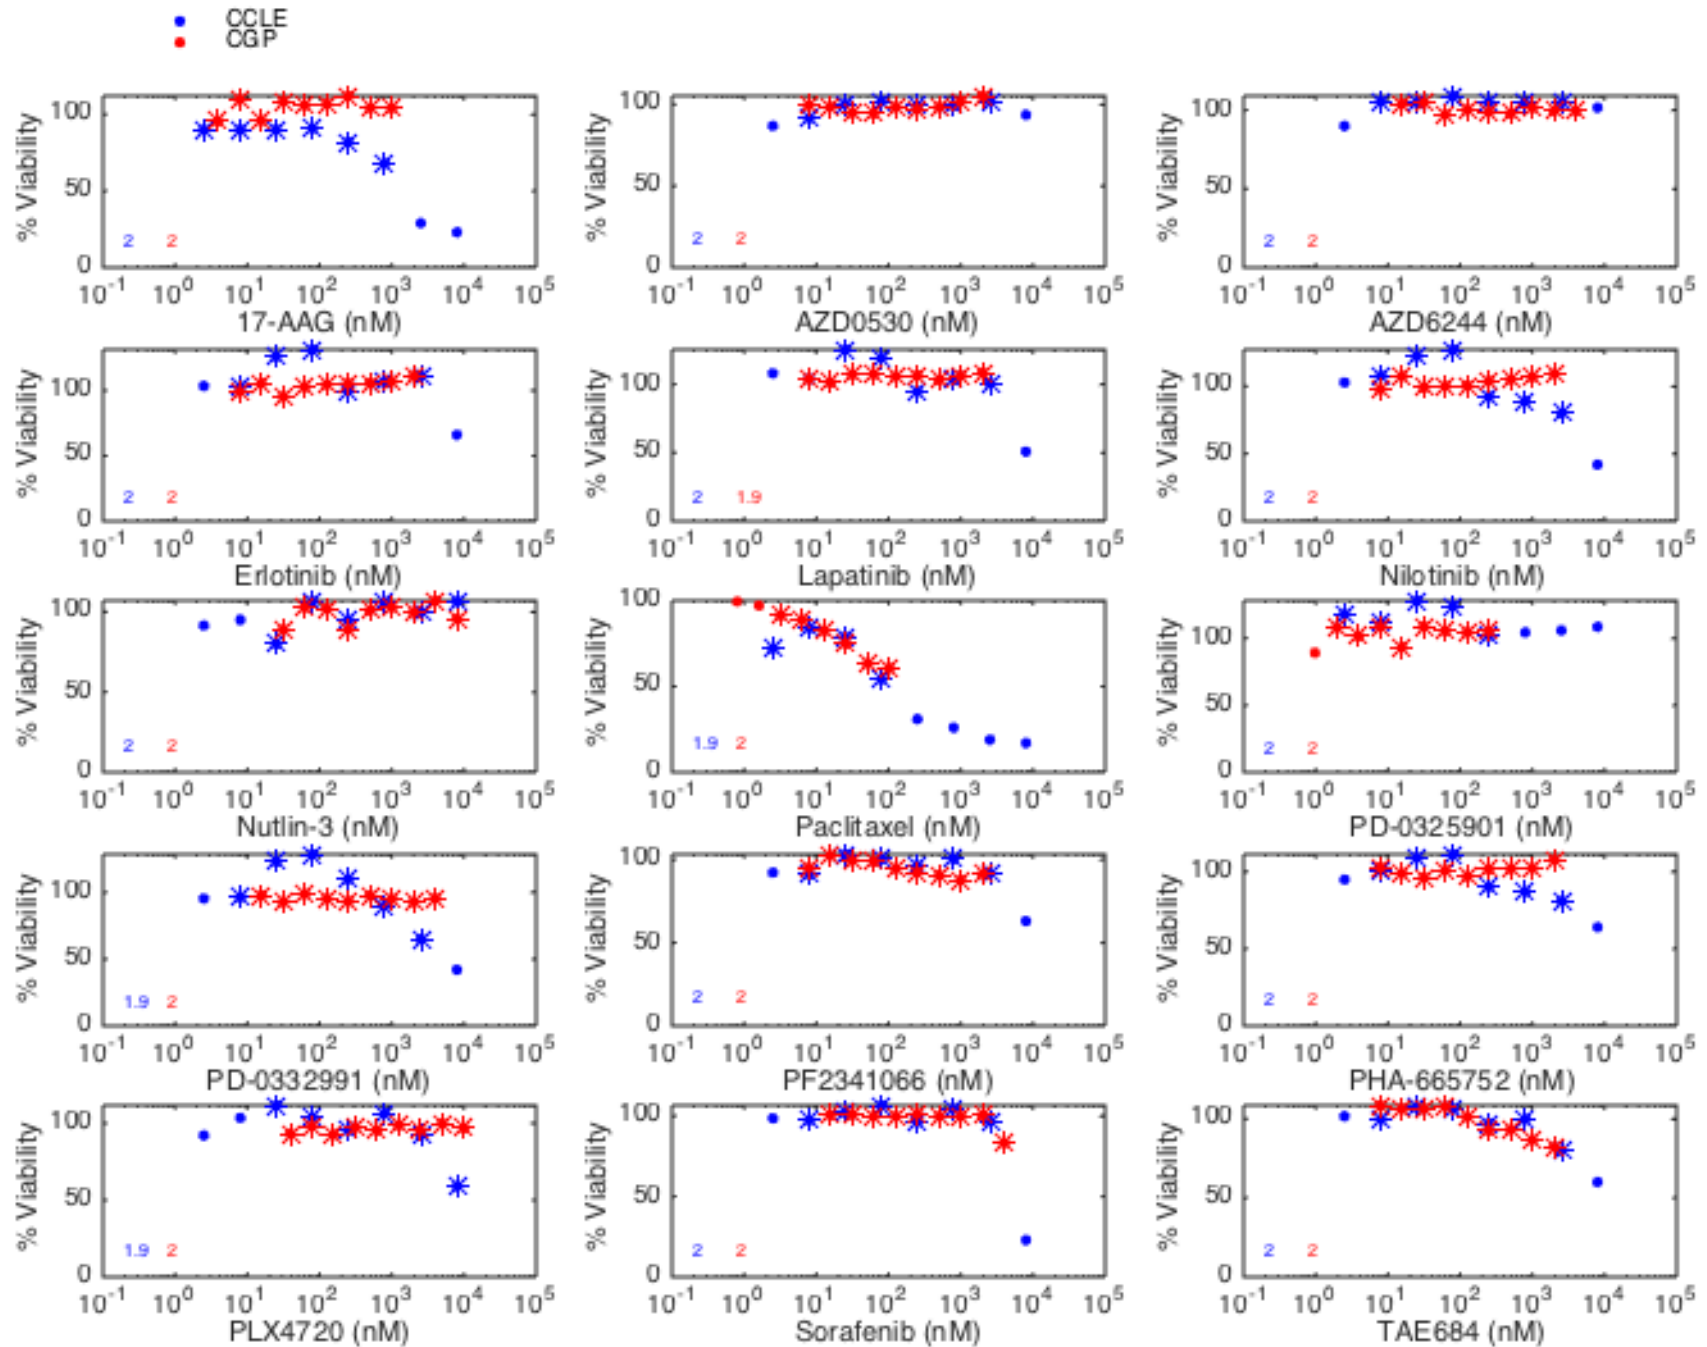

# LCLC-103H

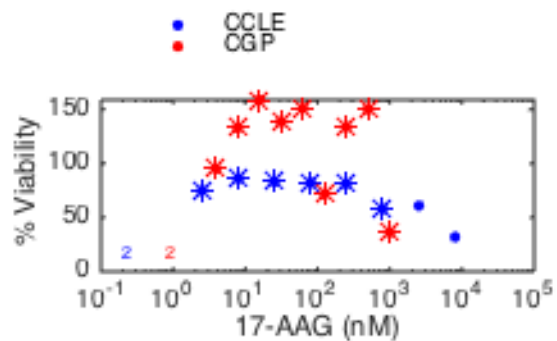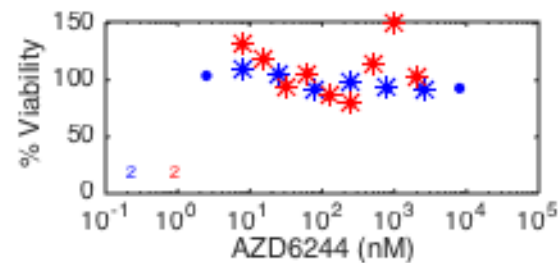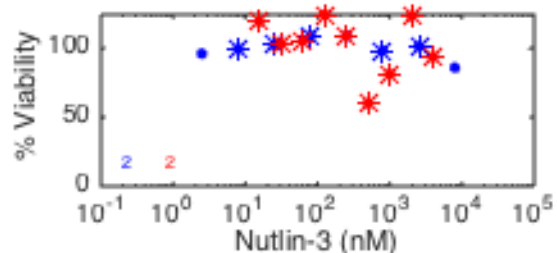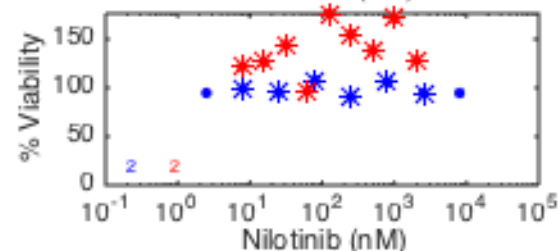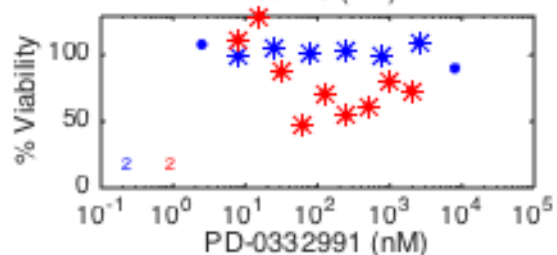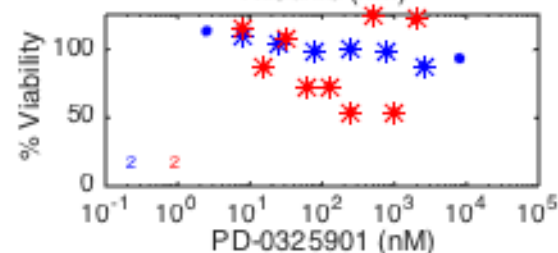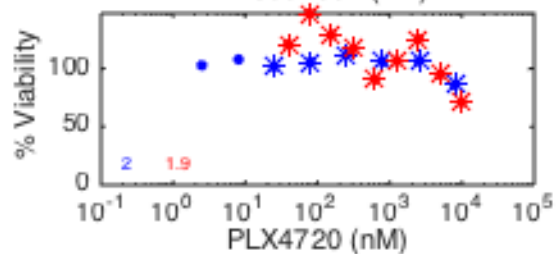

# LOXIMVI

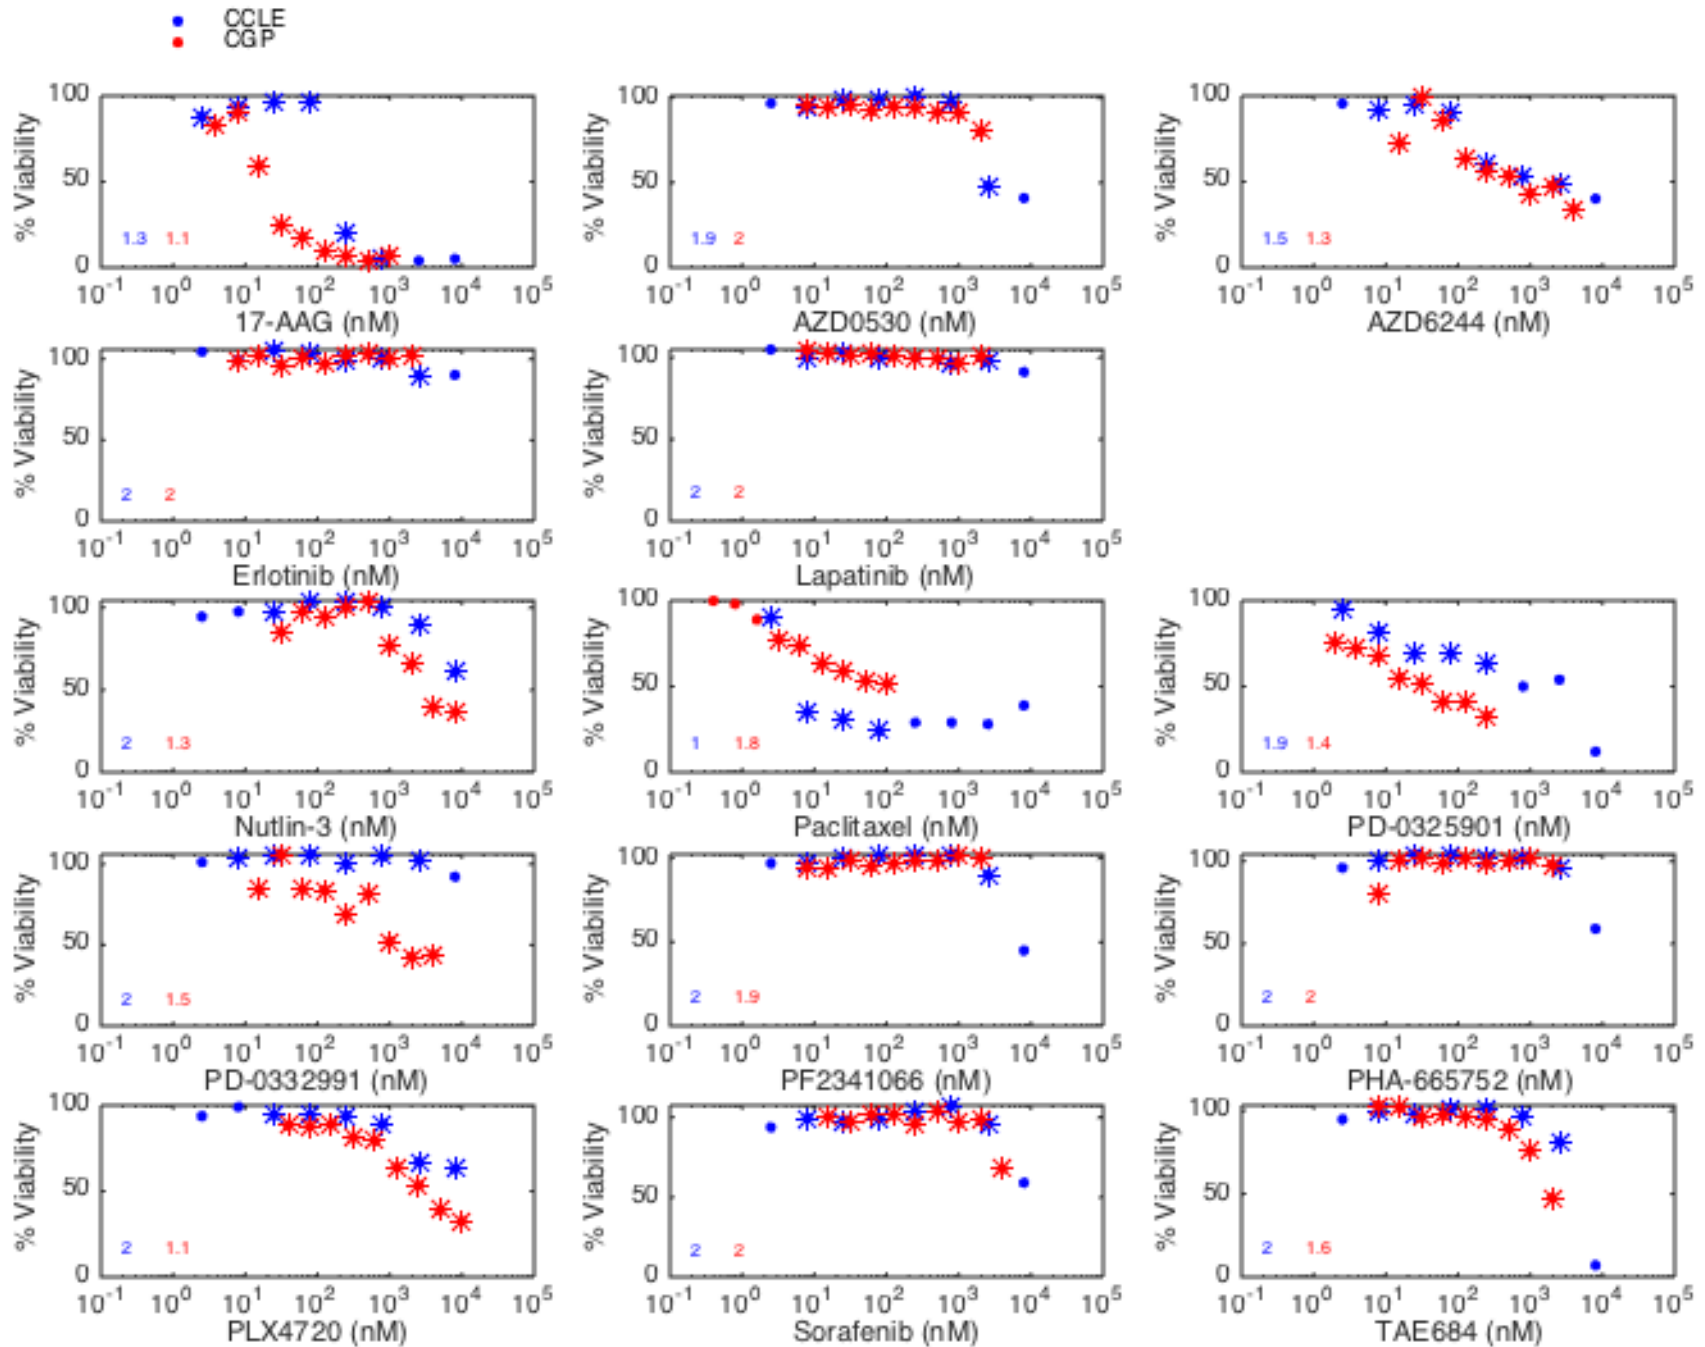

# LP-1

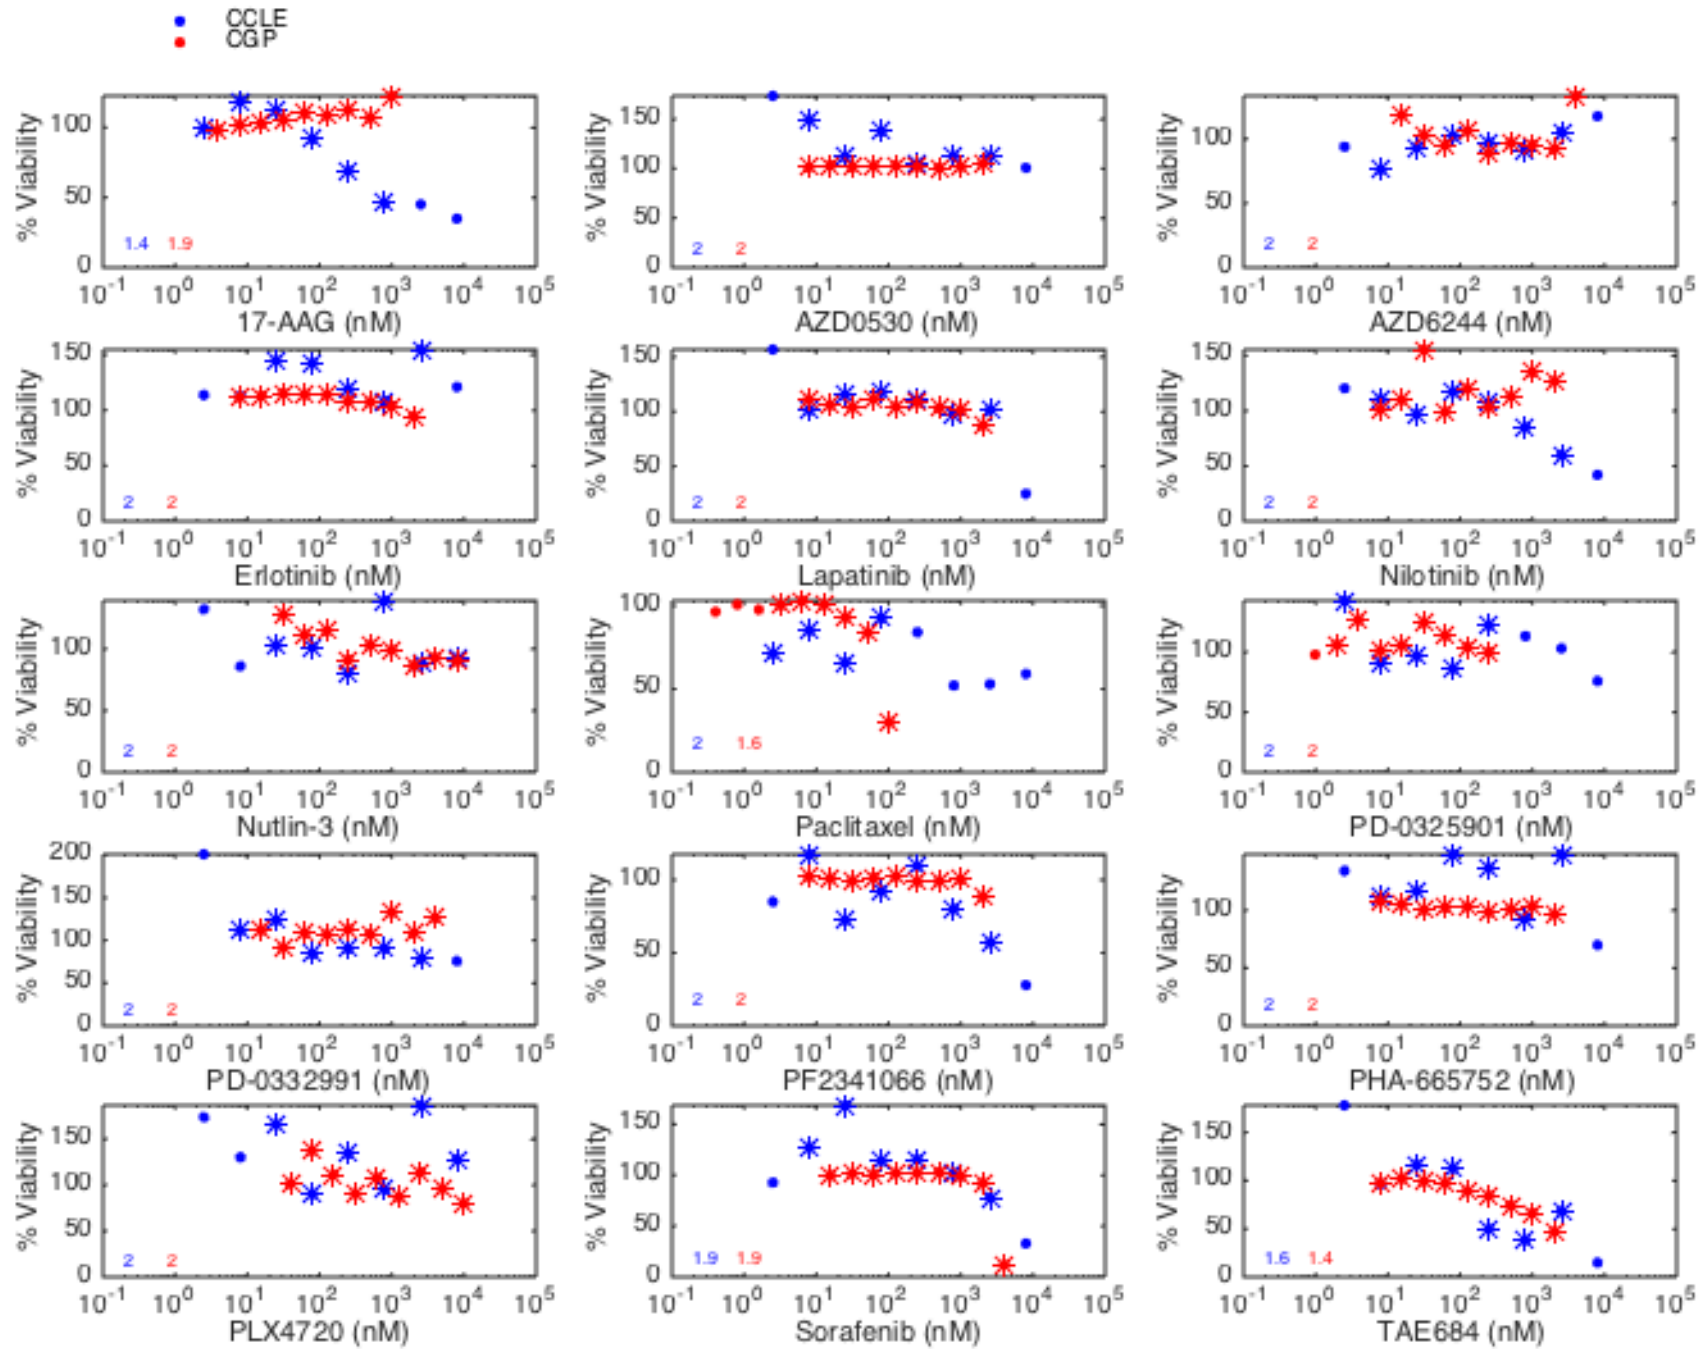

# LS-123

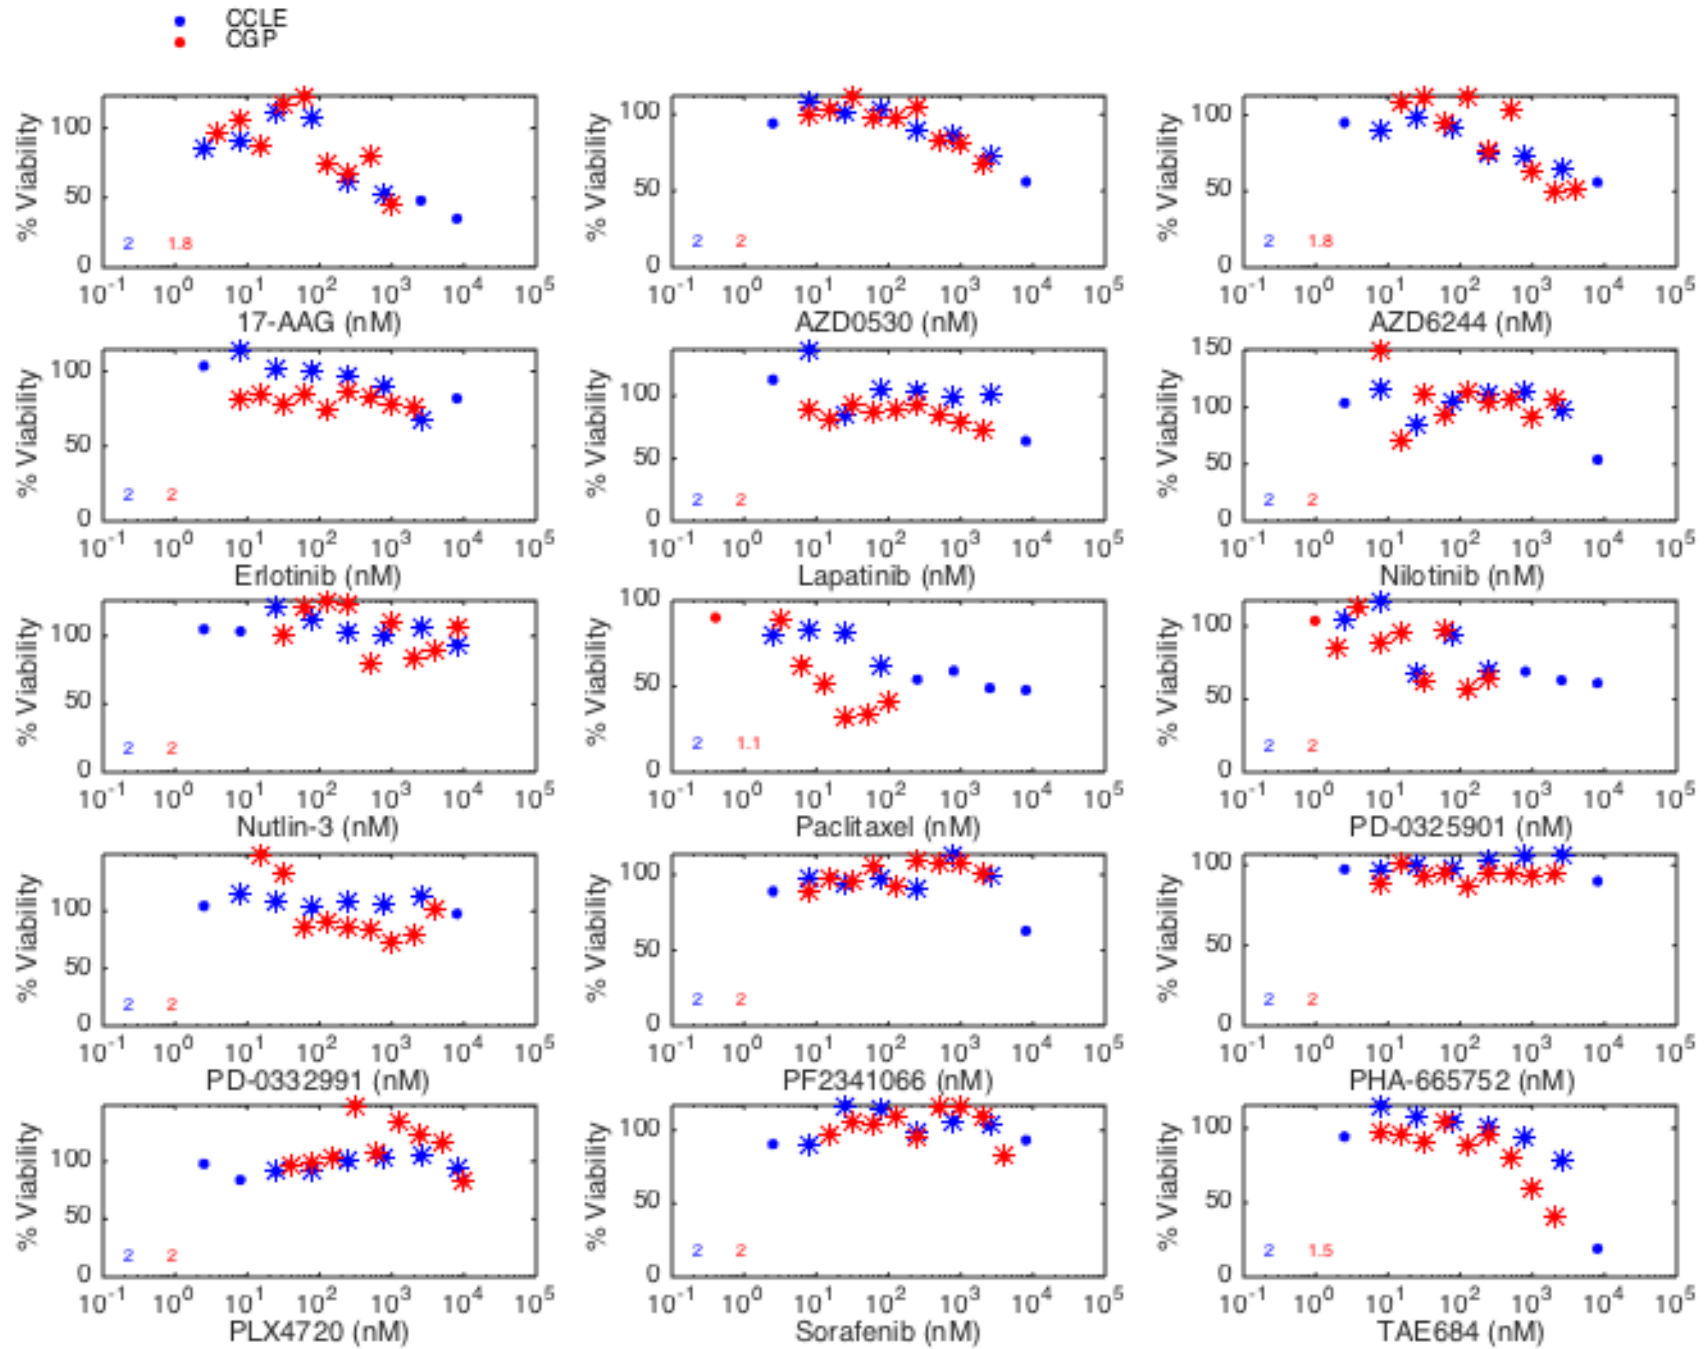

# LS-411N

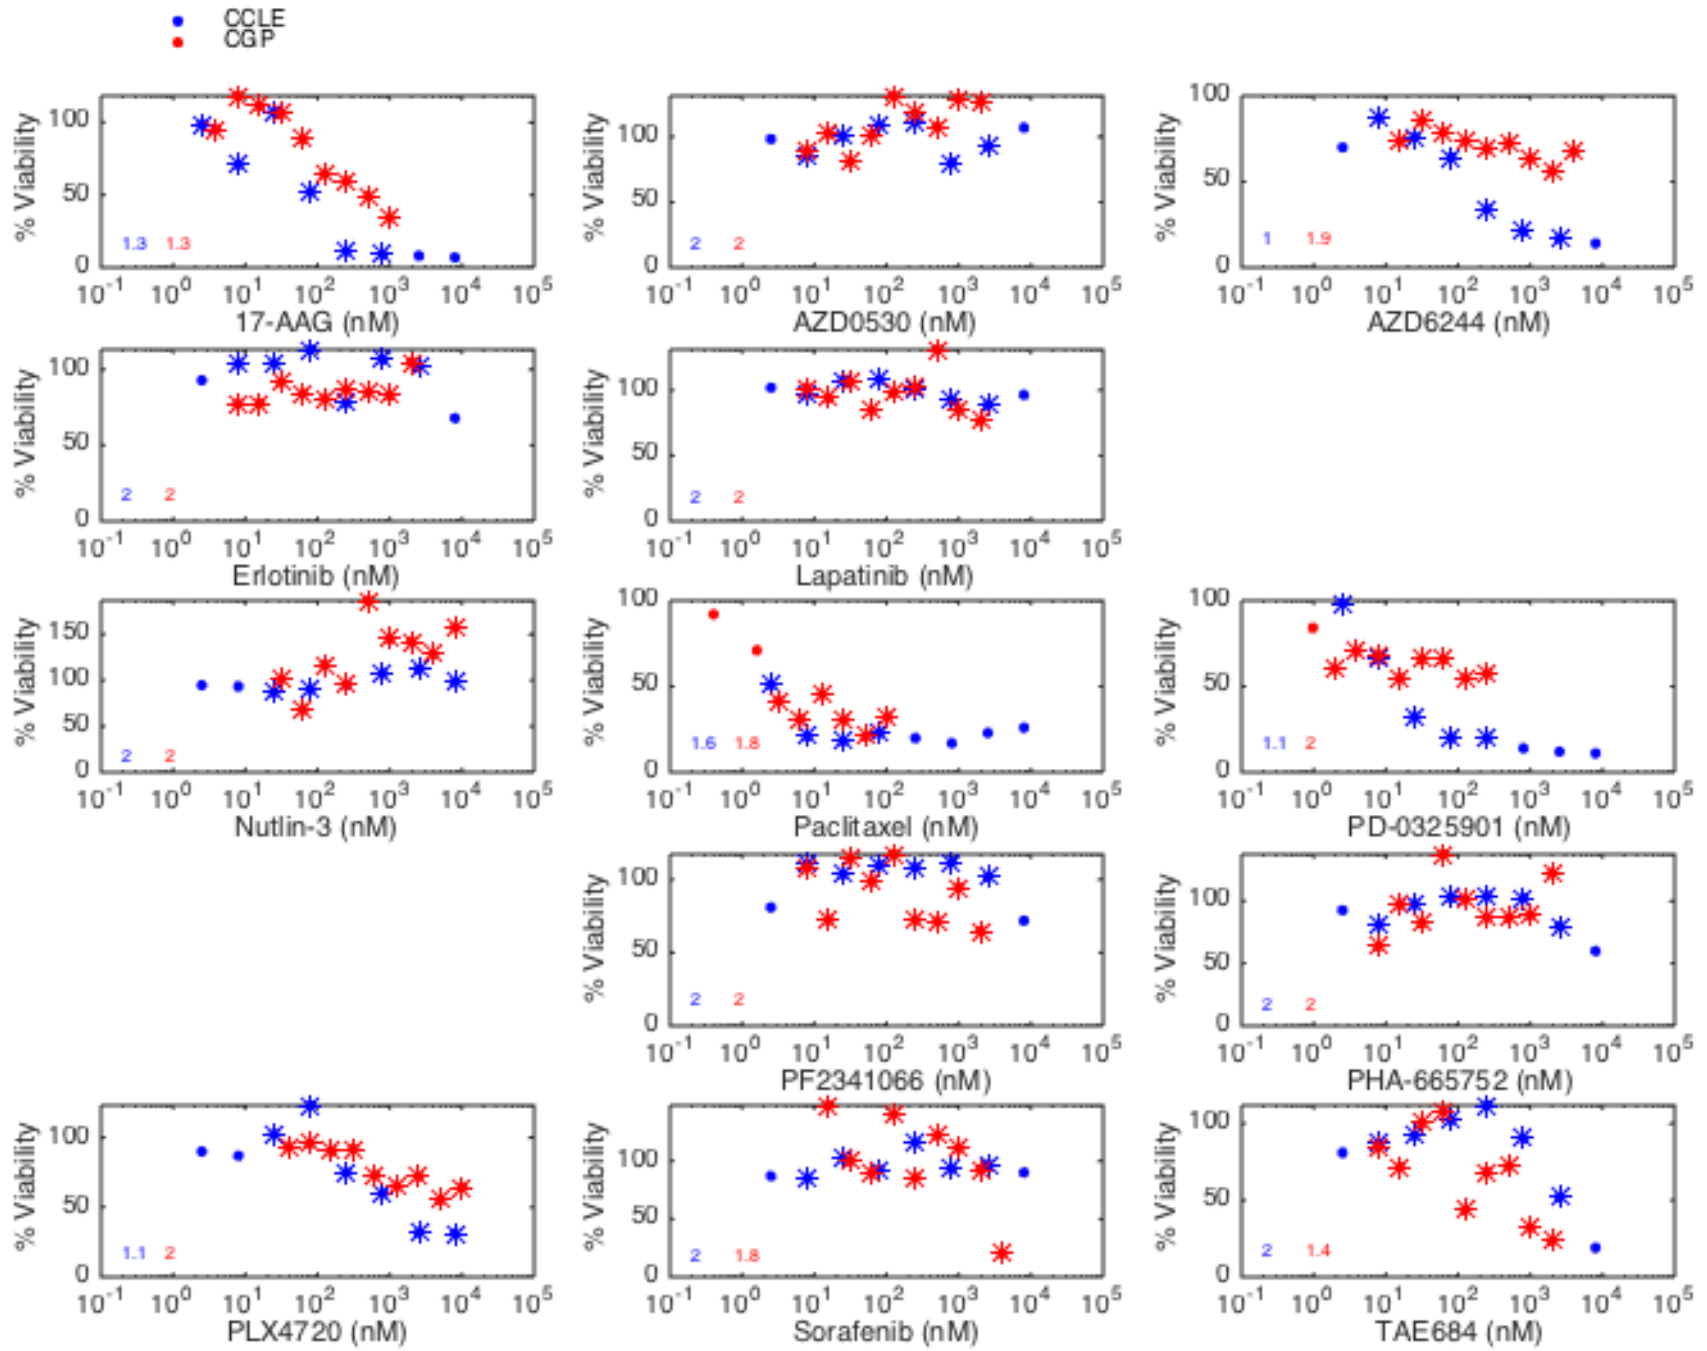



# LS-513

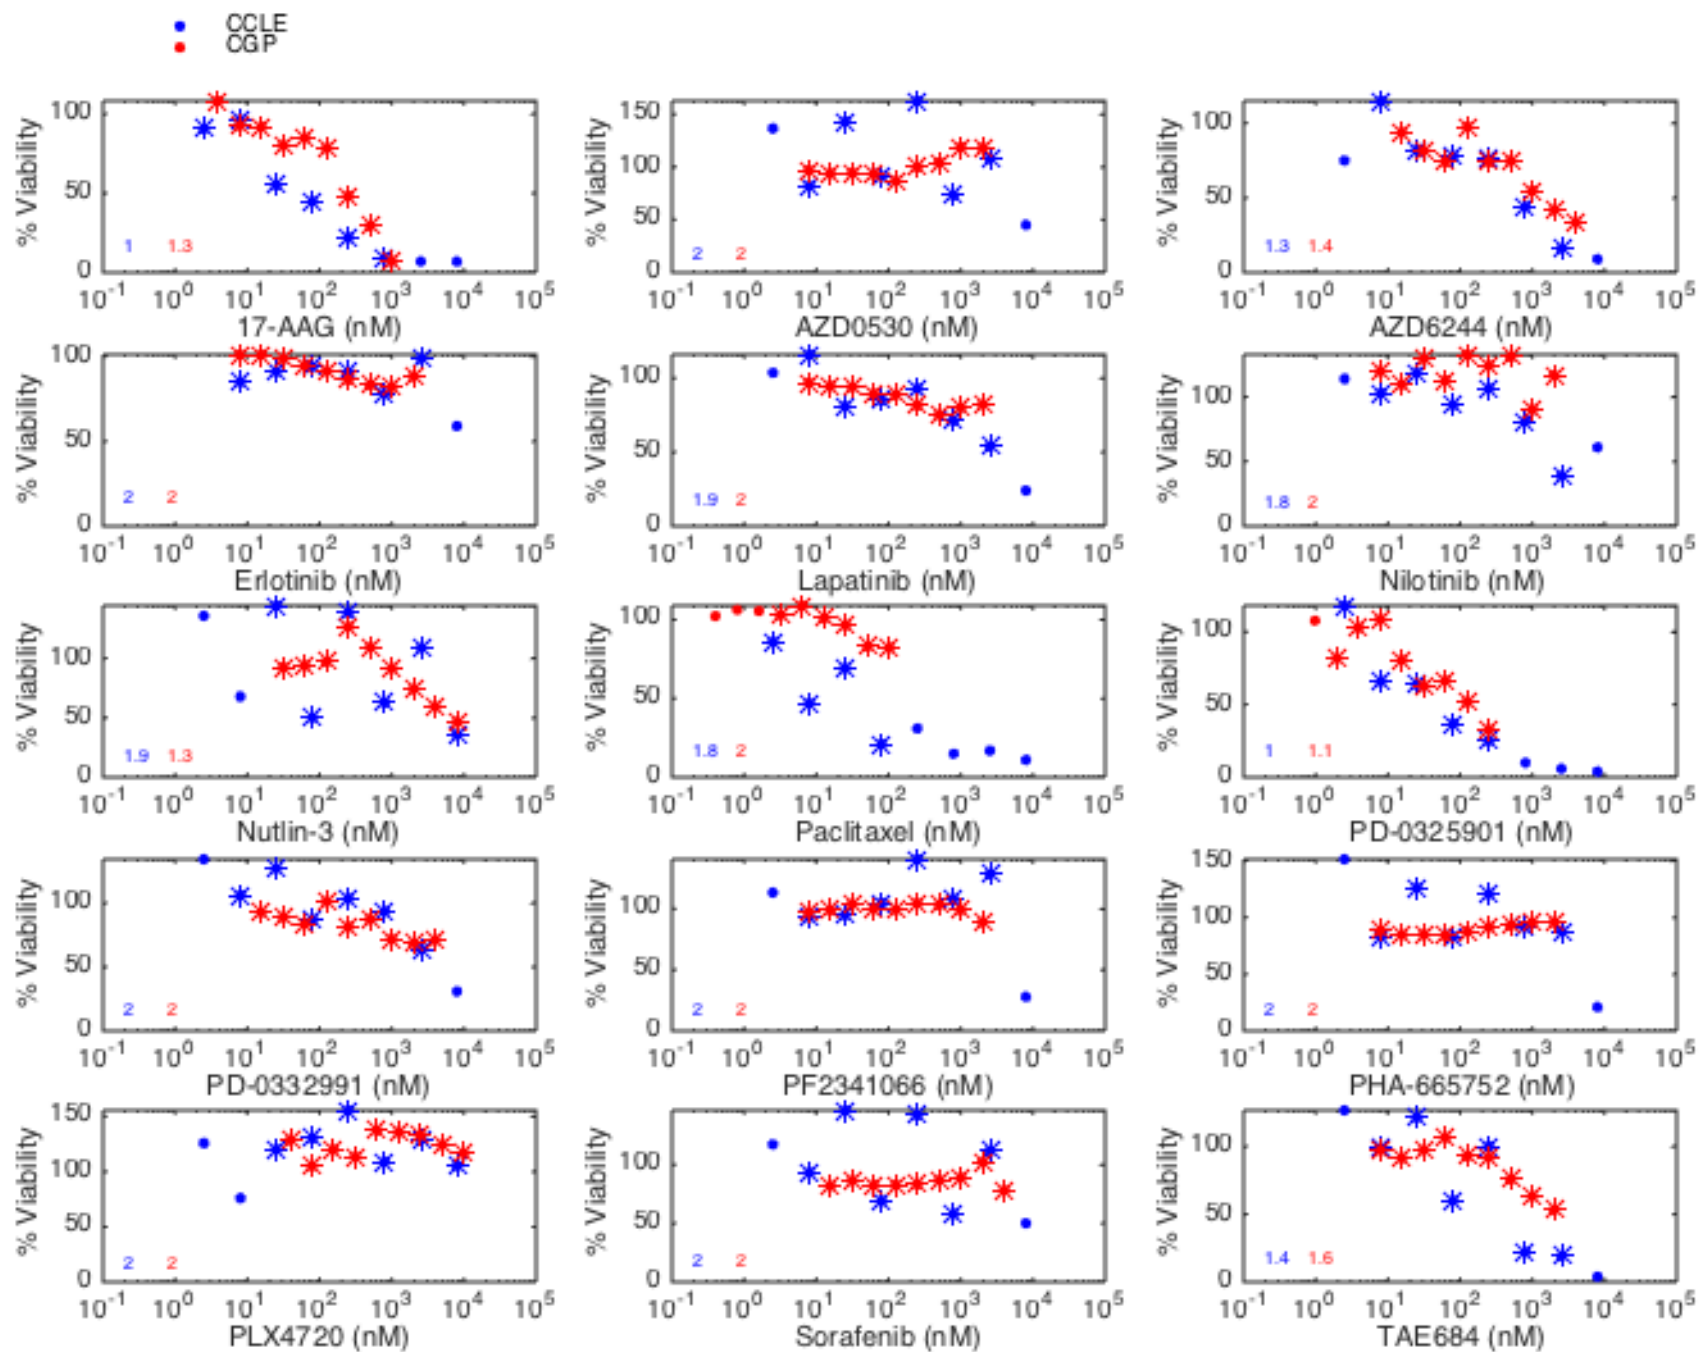

LU-99A

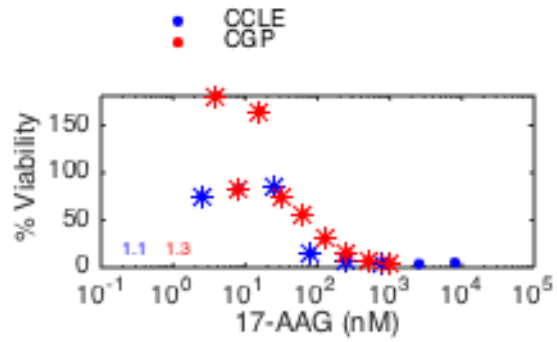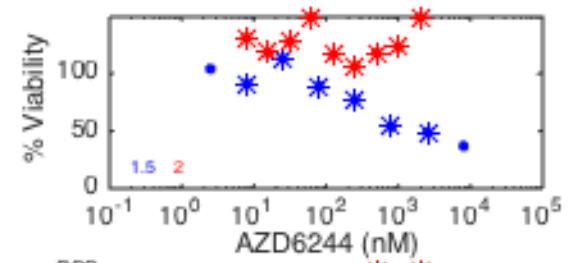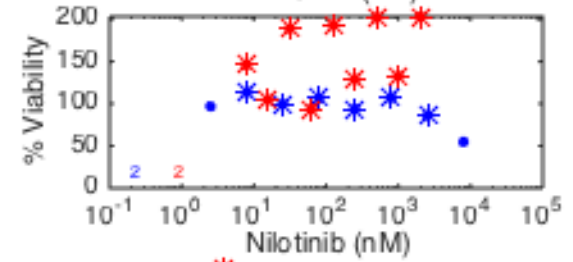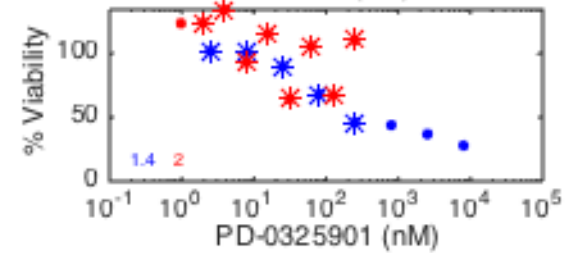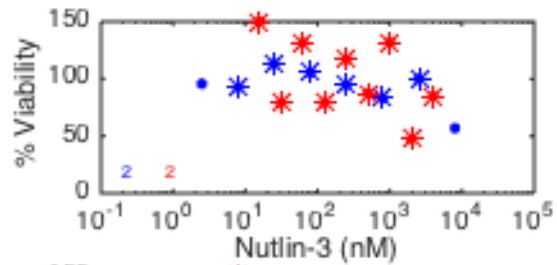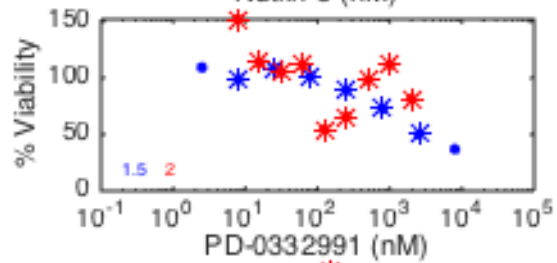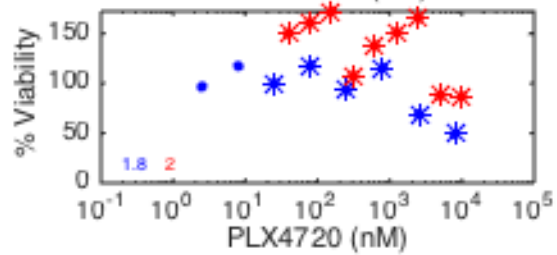

M059J

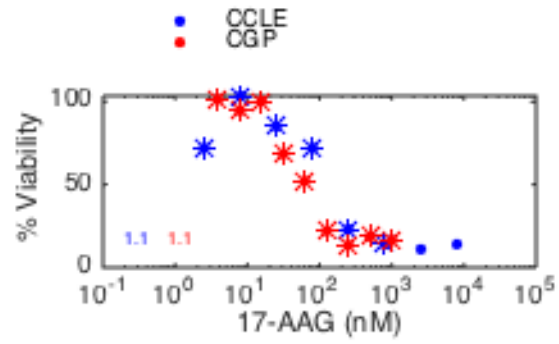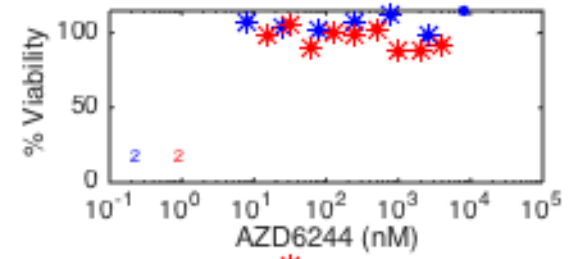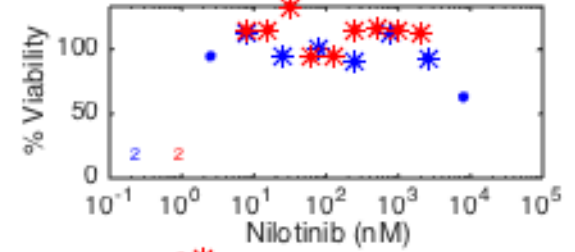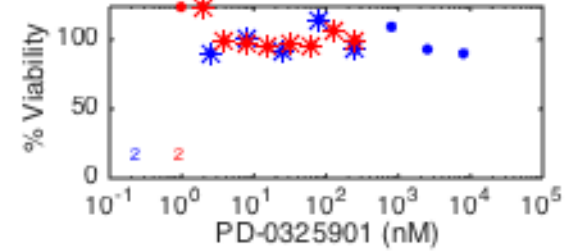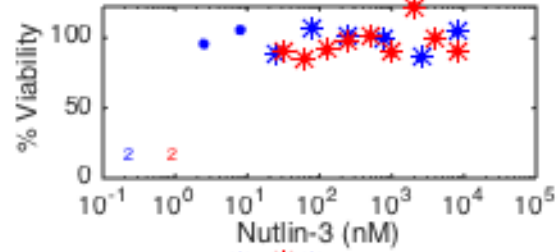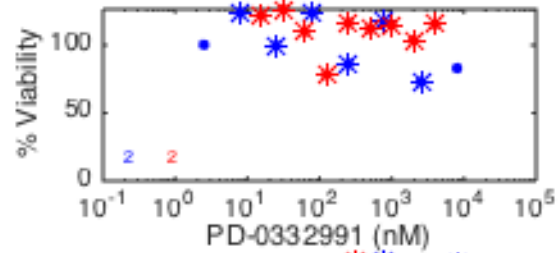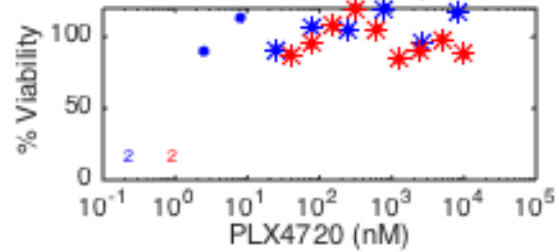

# MC116

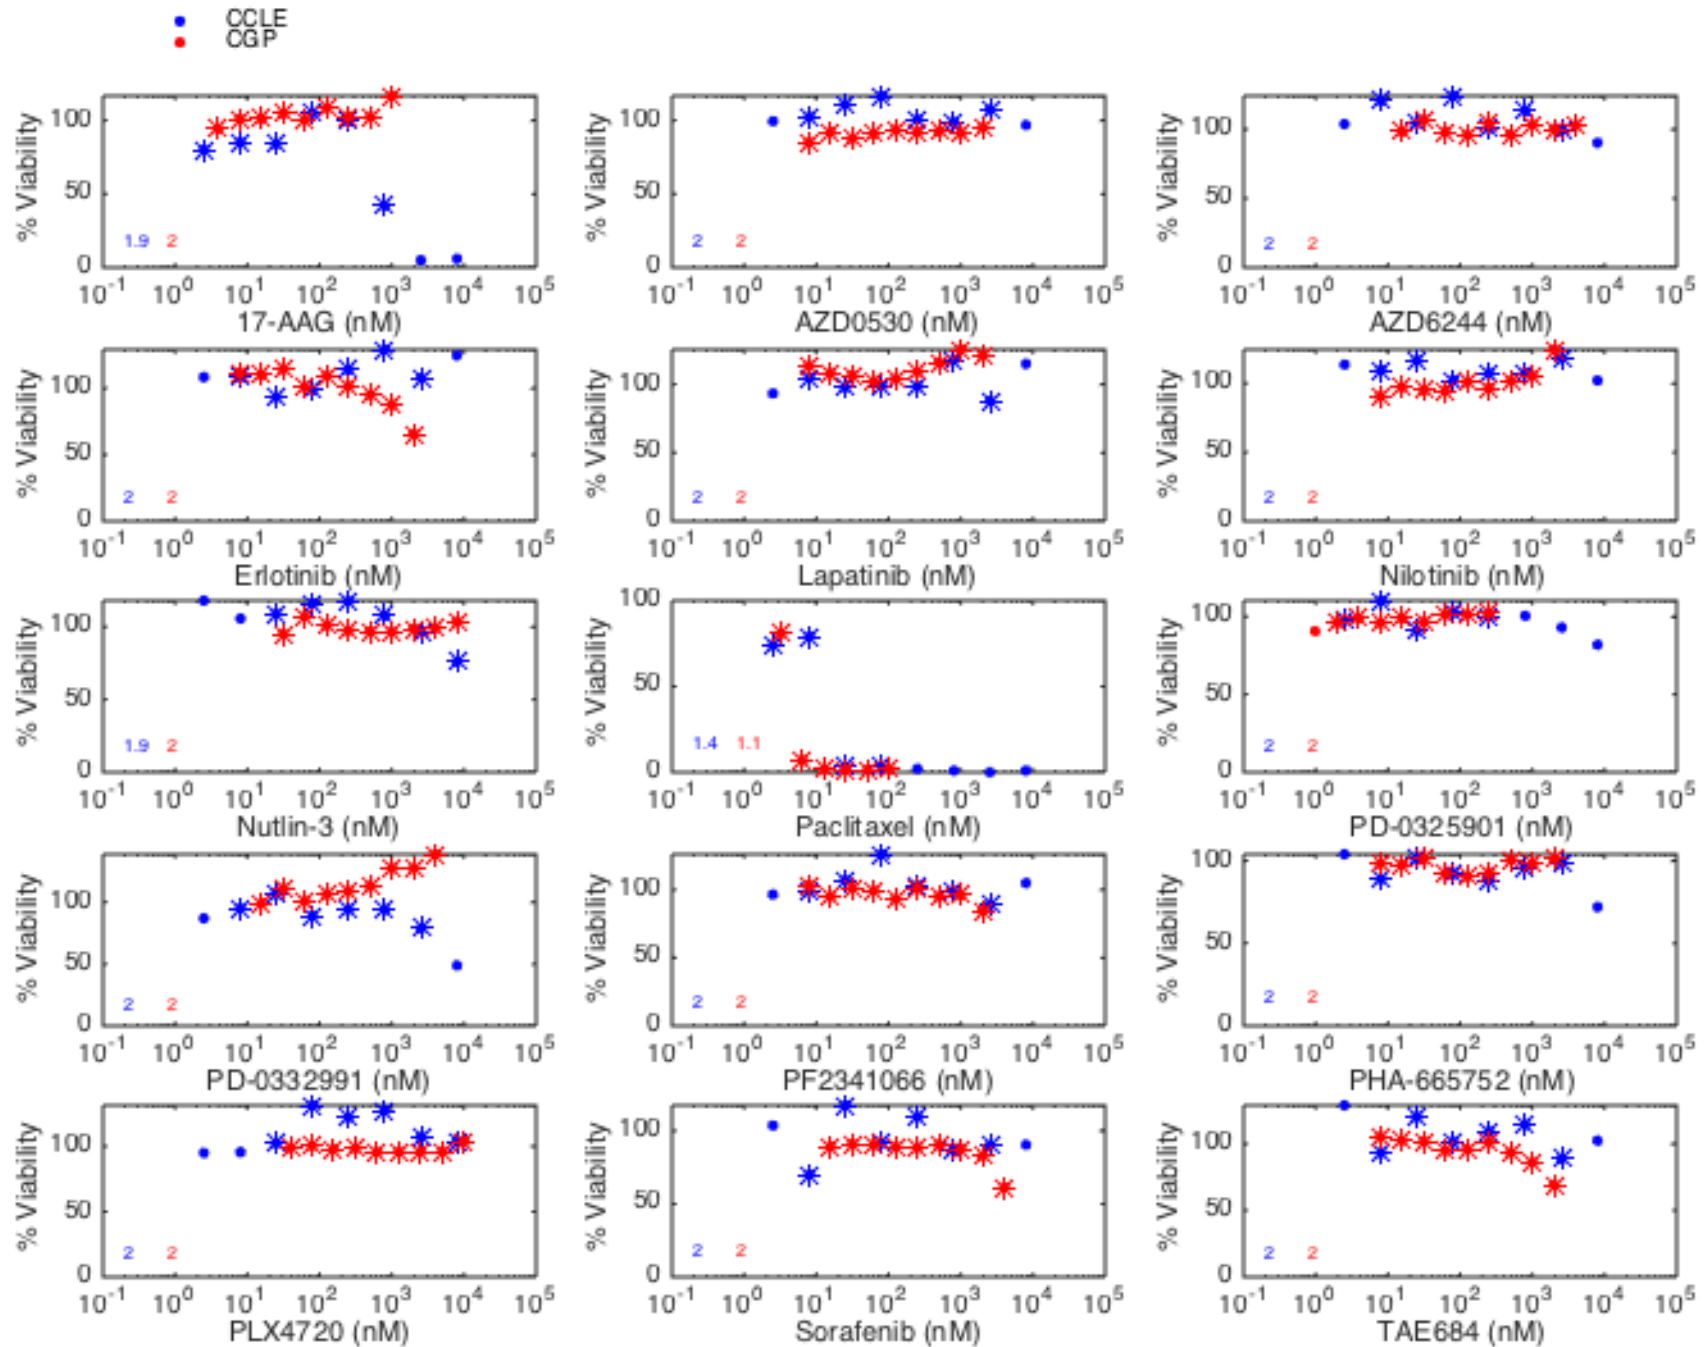

# MCF7

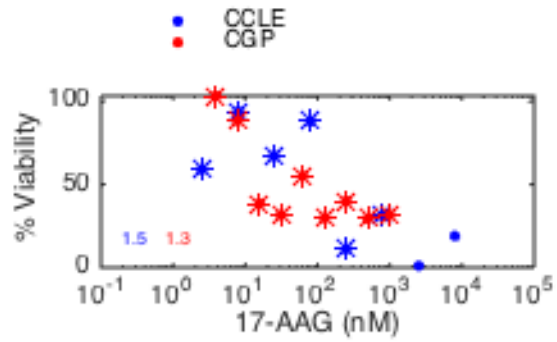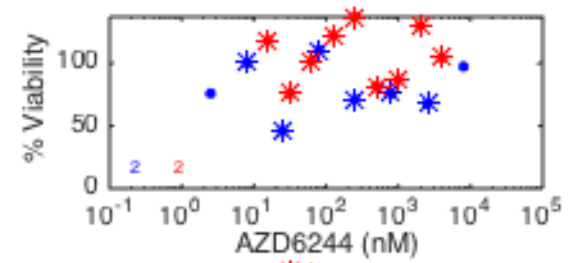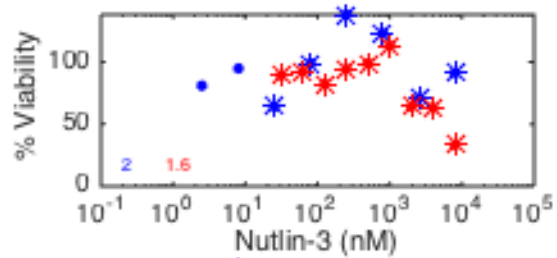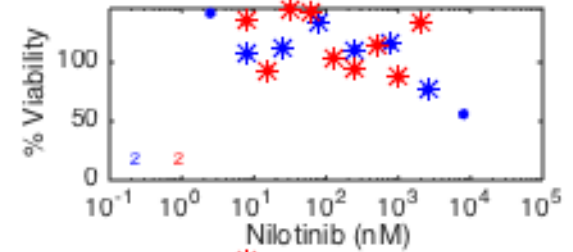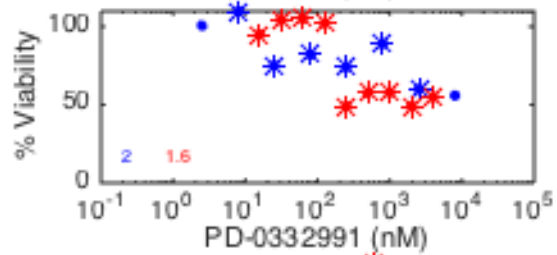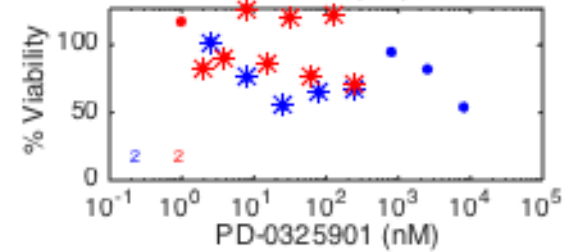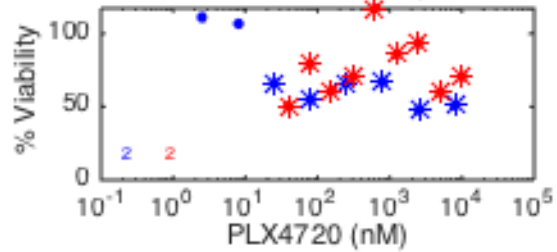

# MDA-MB-157

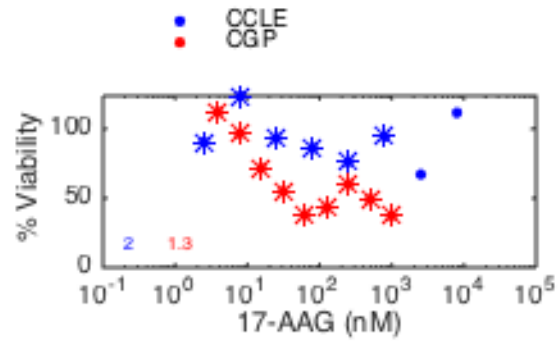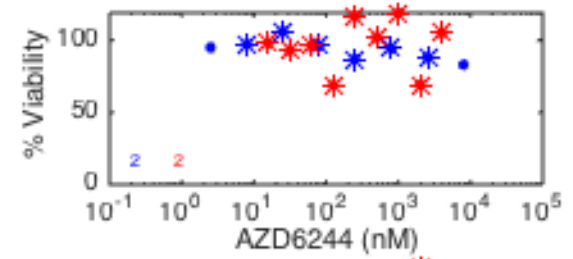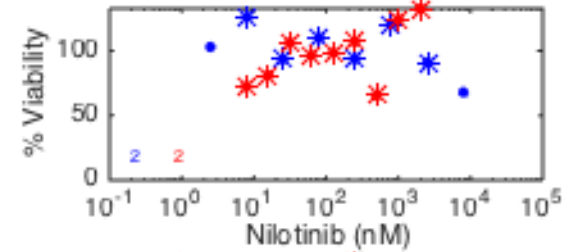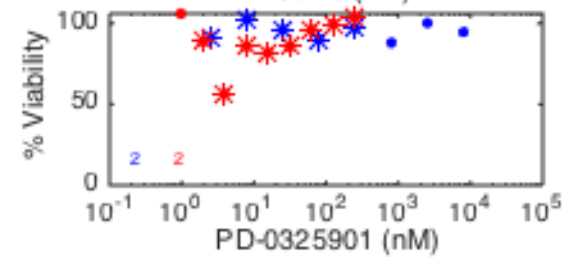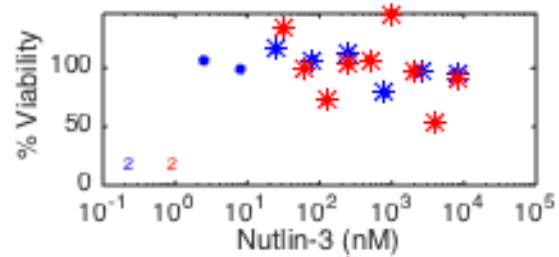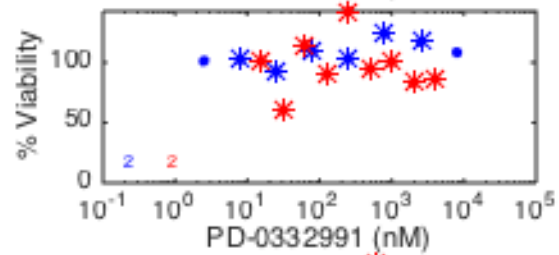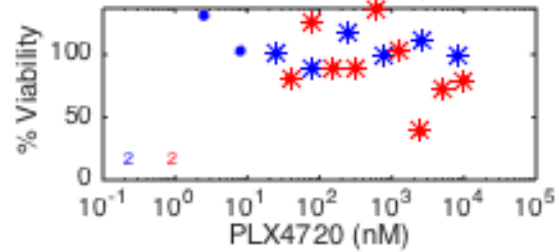

# MDA-MB-175-VII

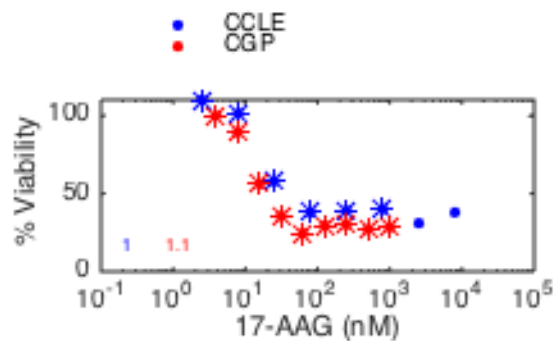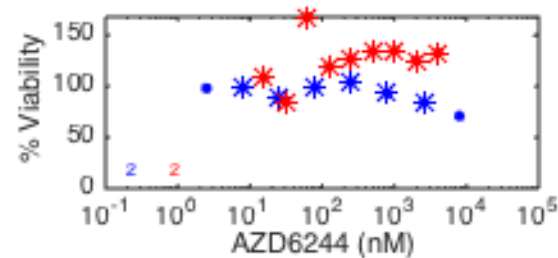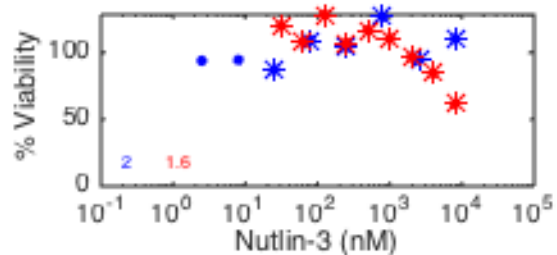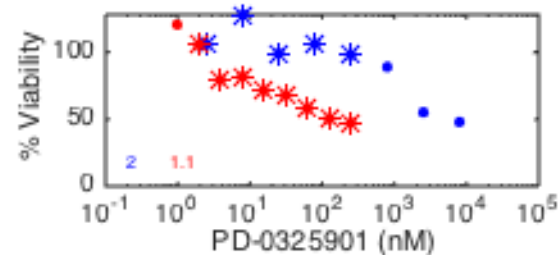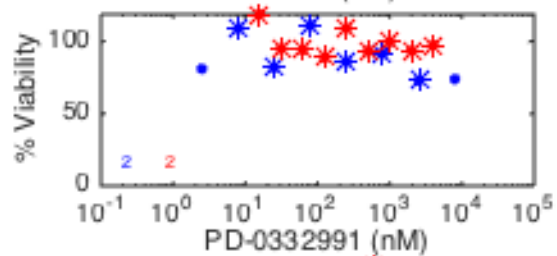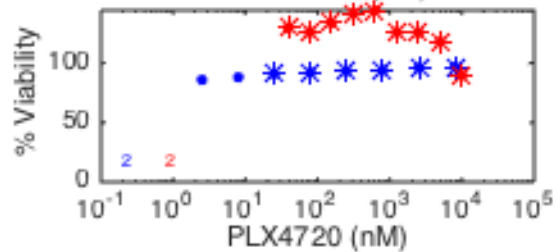

# MDA-MB-415

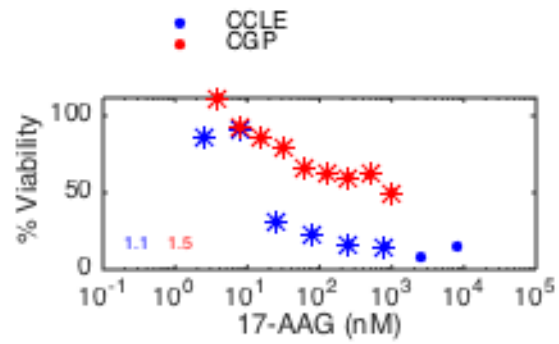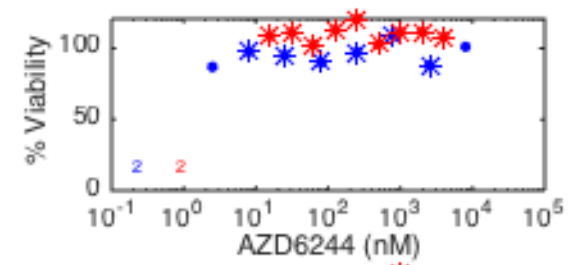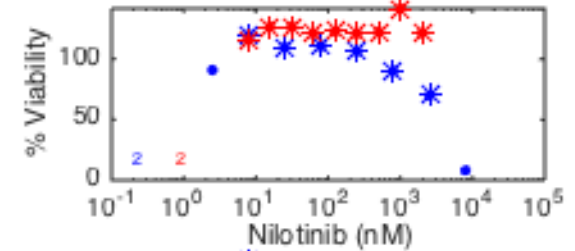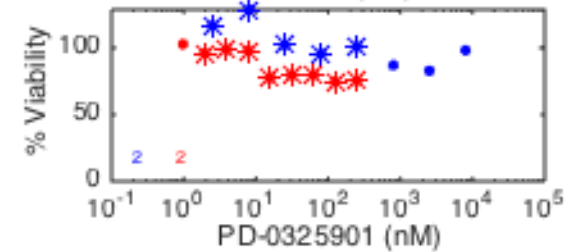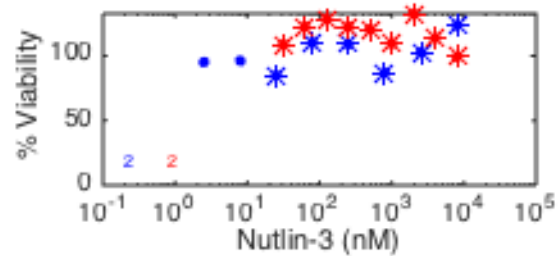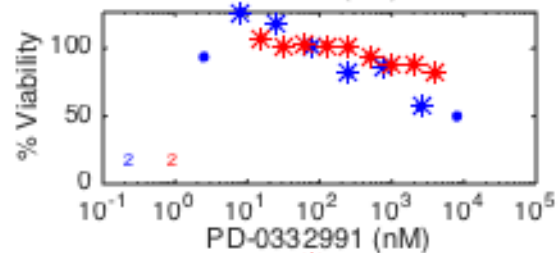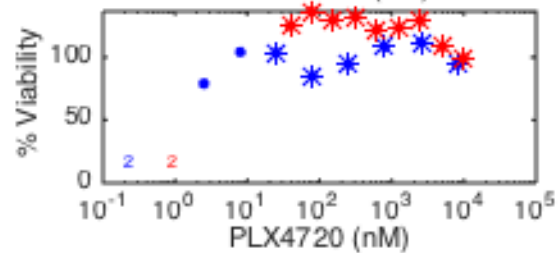



# MDA-MB-453

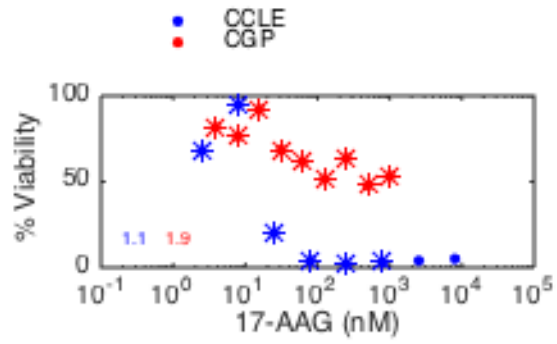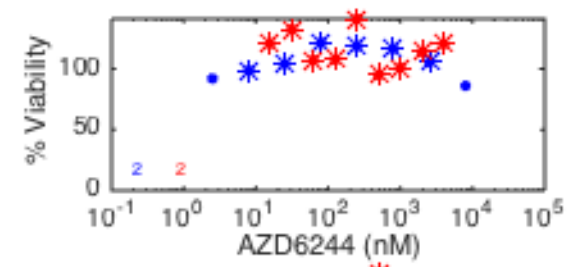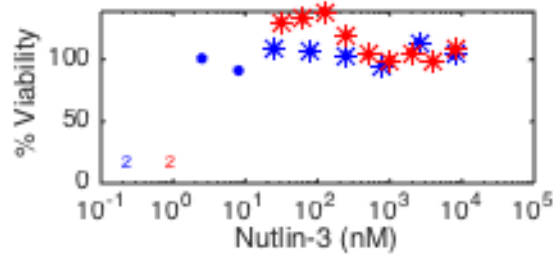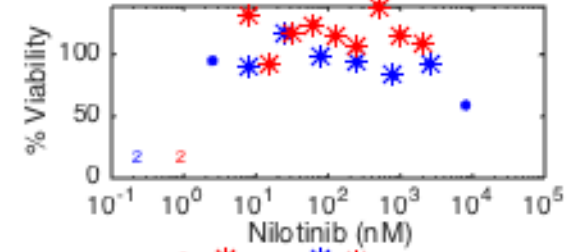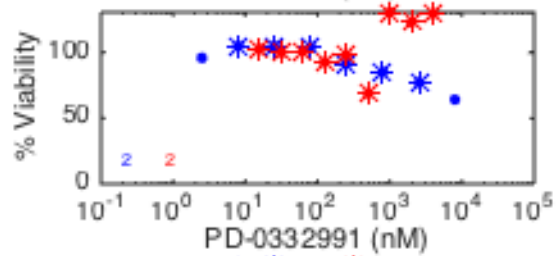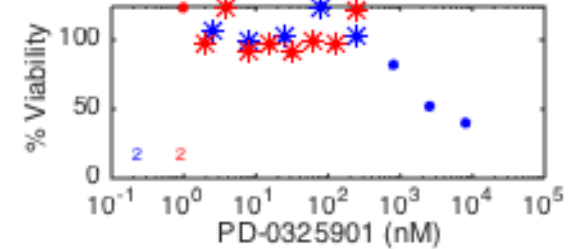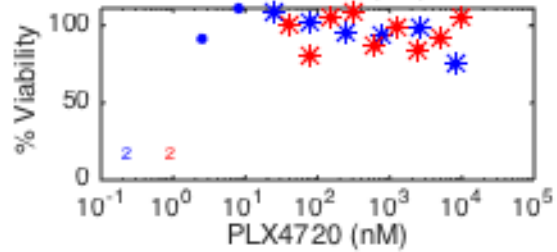

MDA-MB-468

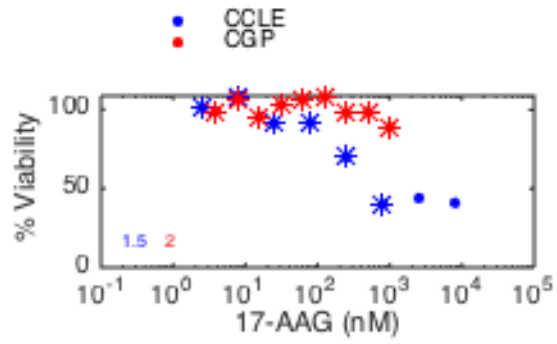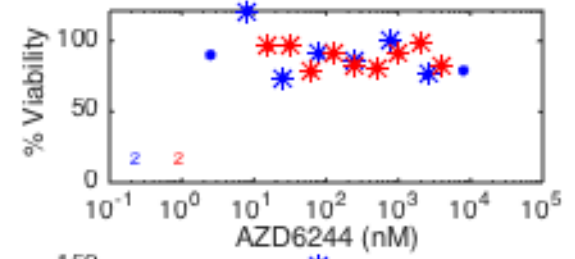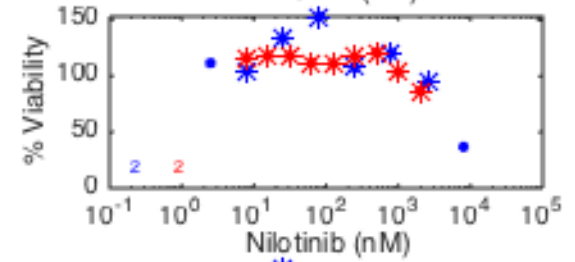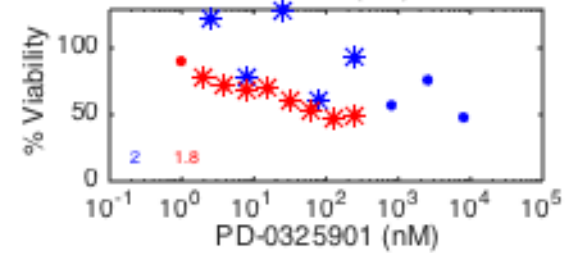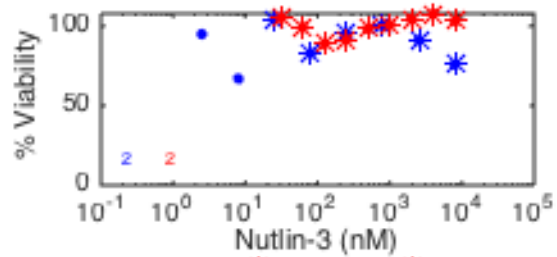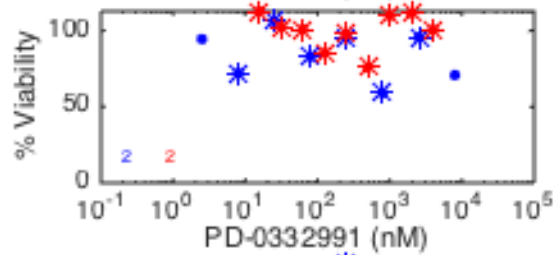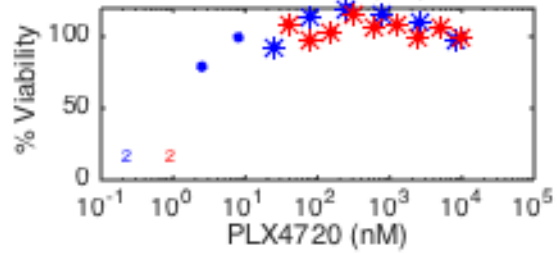

# MEG-01

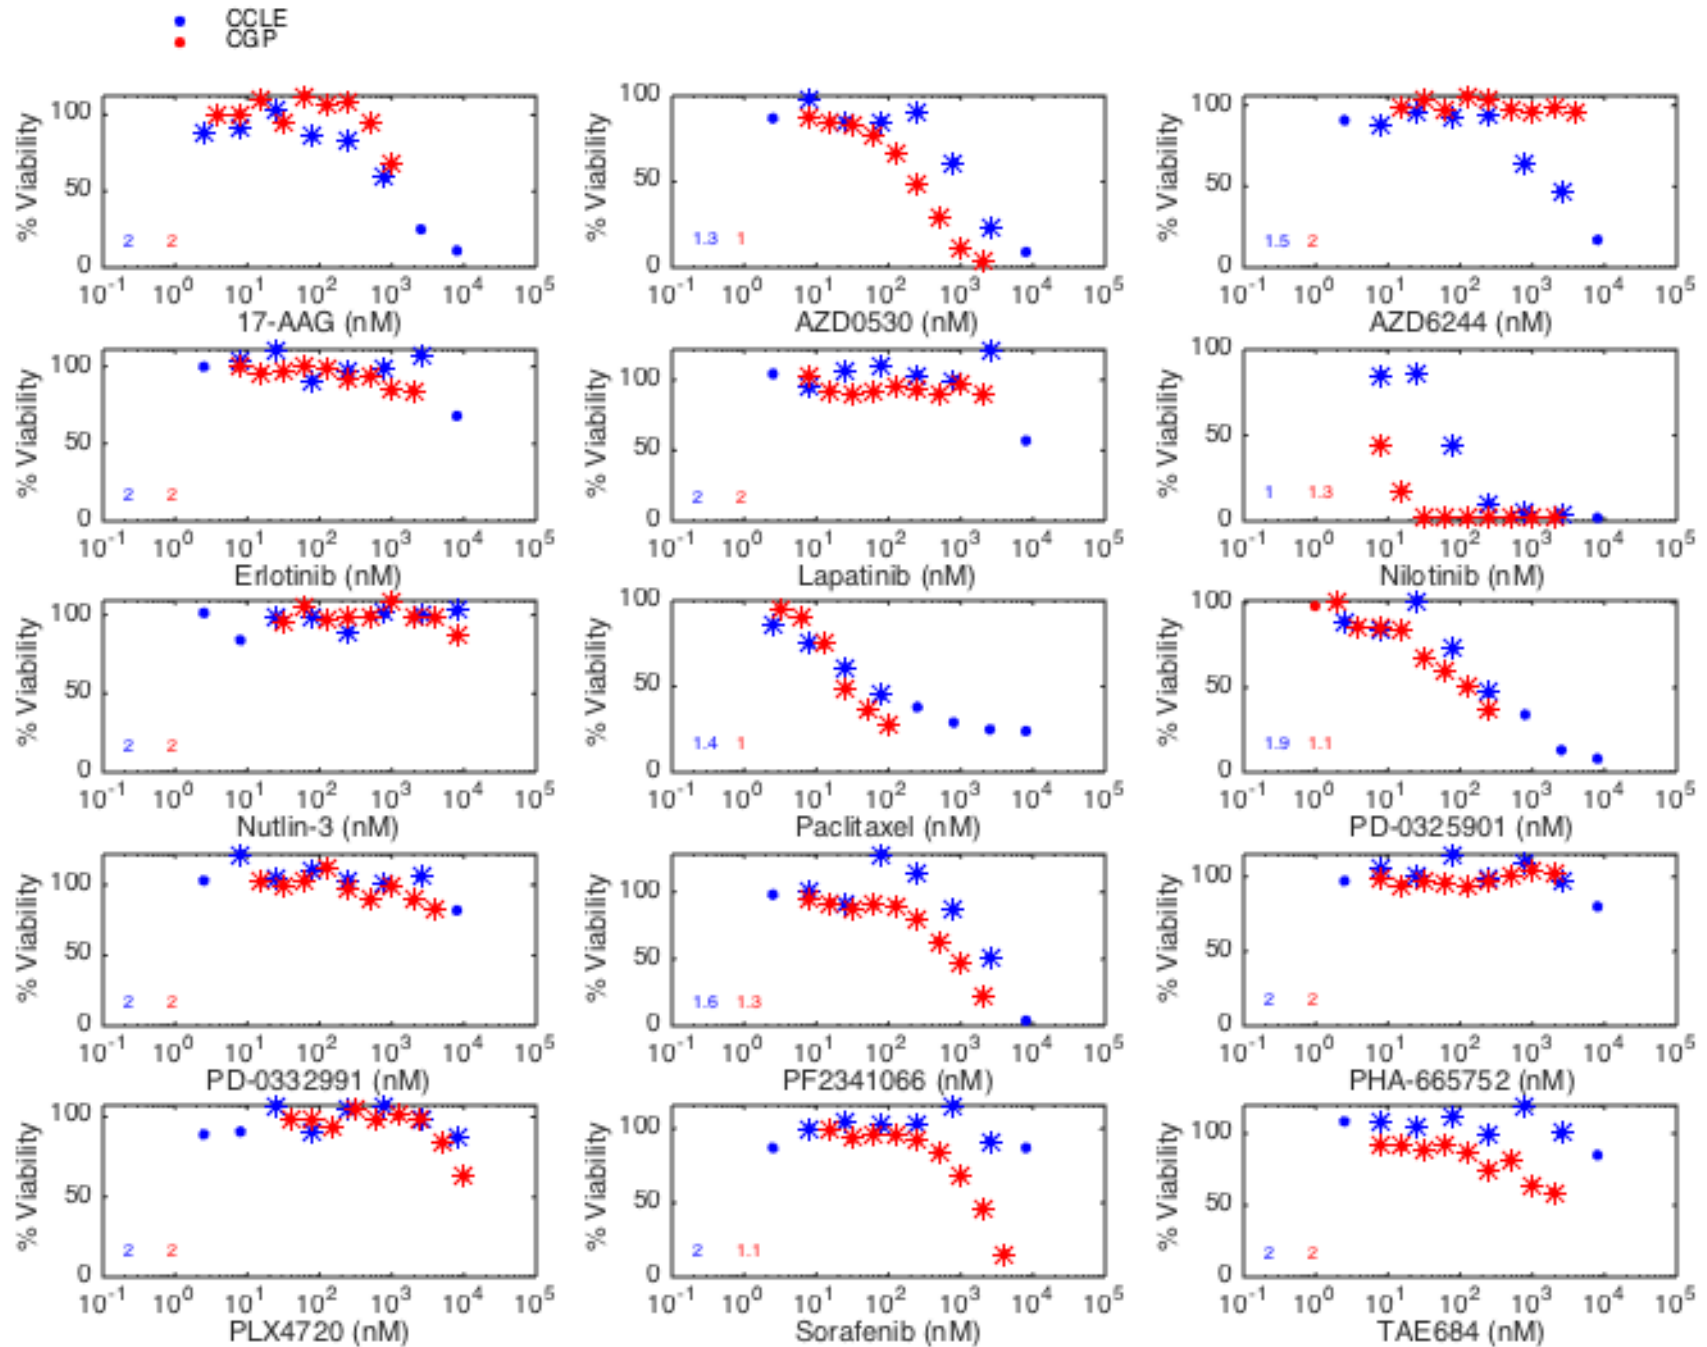

# MEL-HO

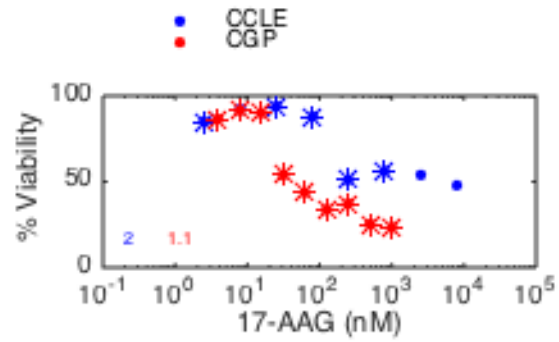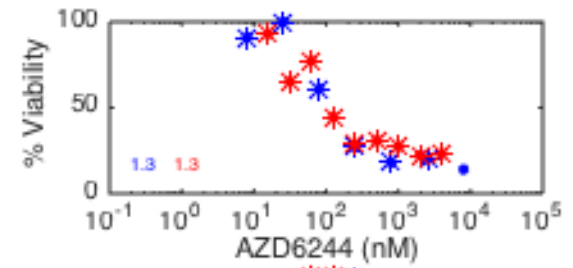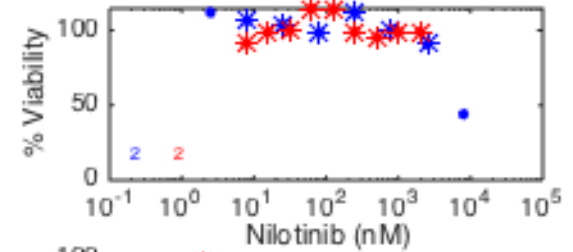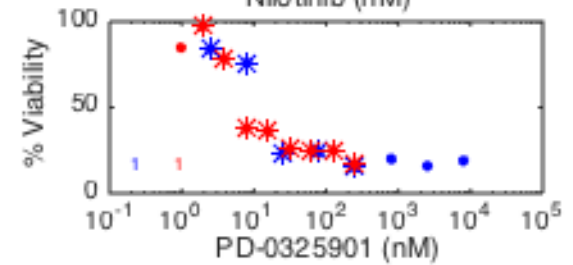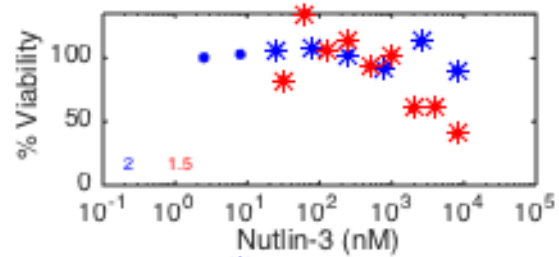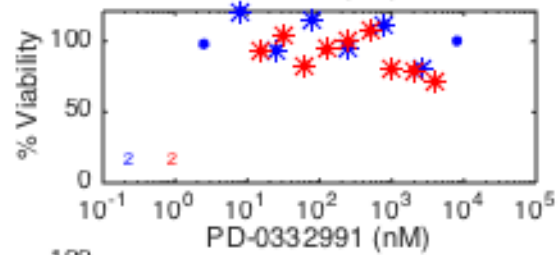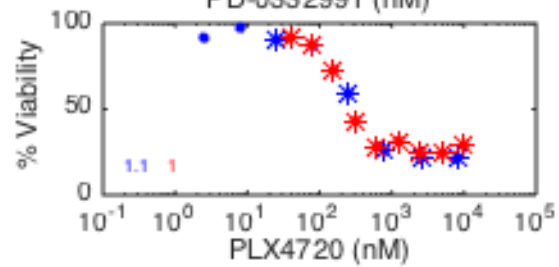

# MES-SA

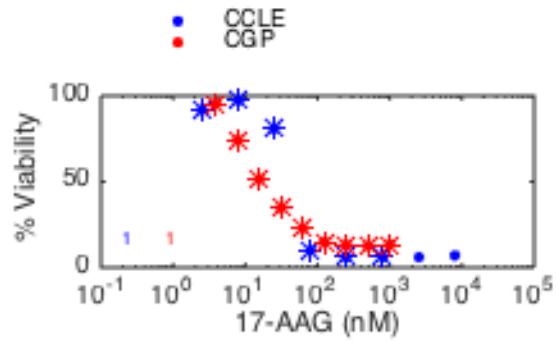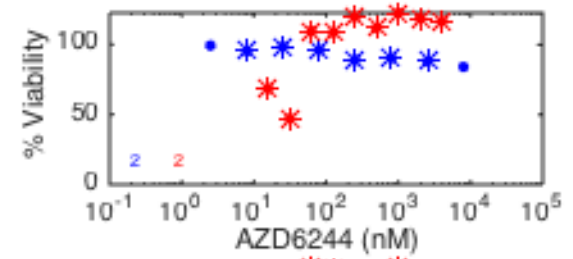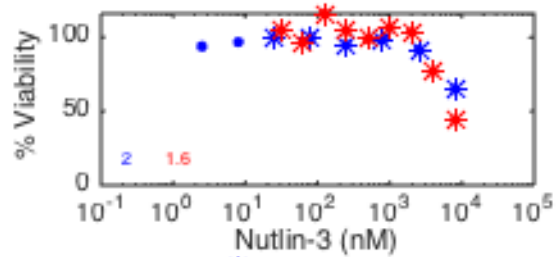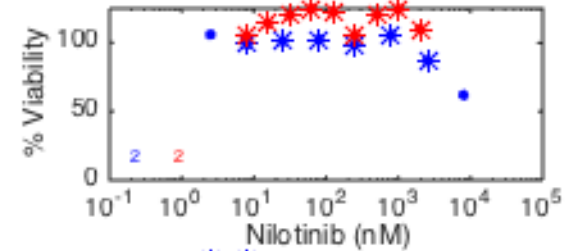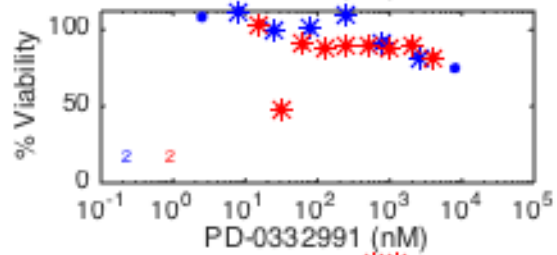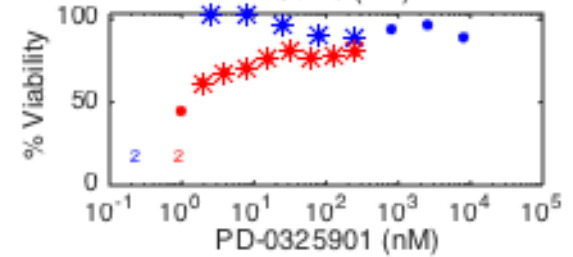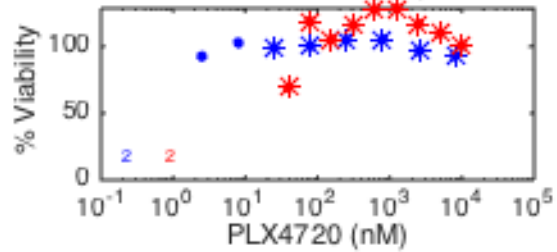

# Mewo

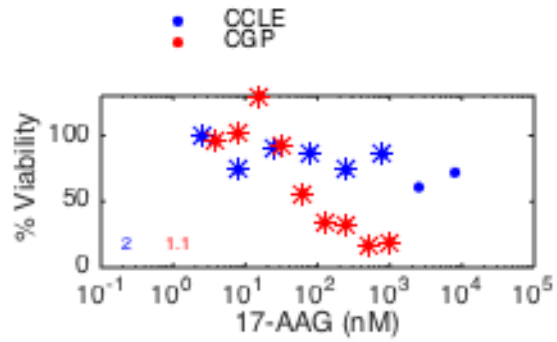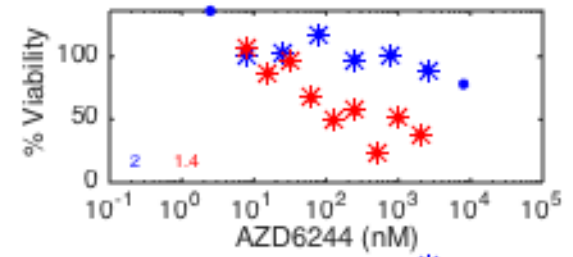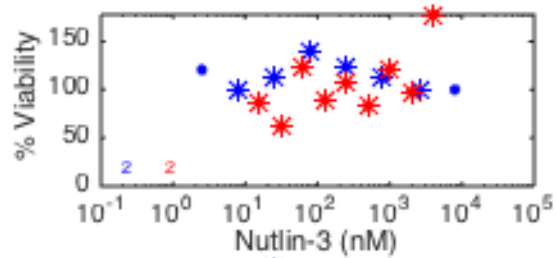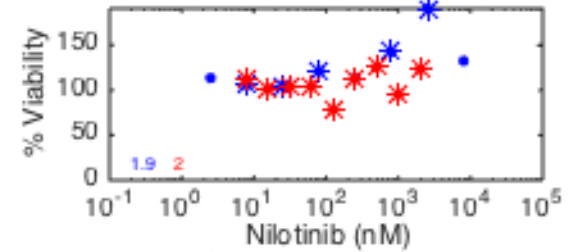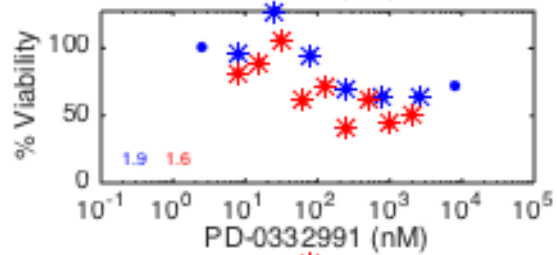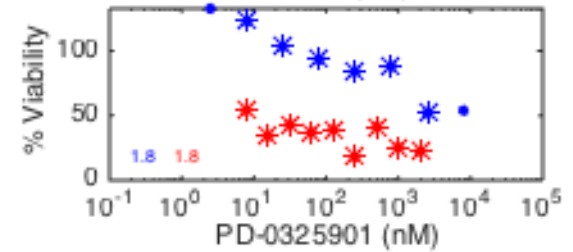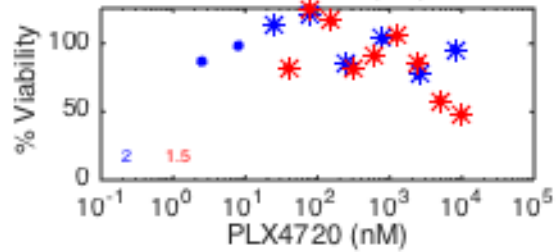

MFE-280

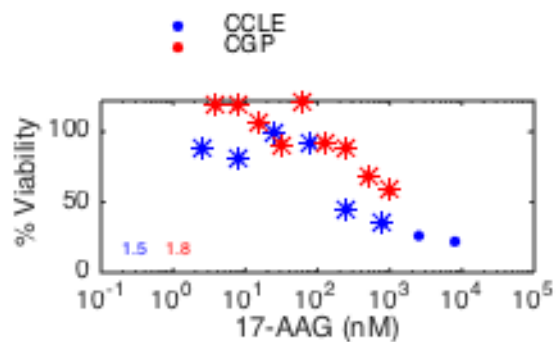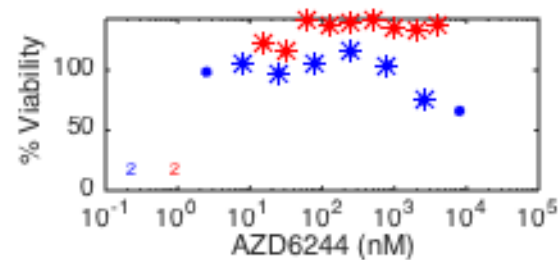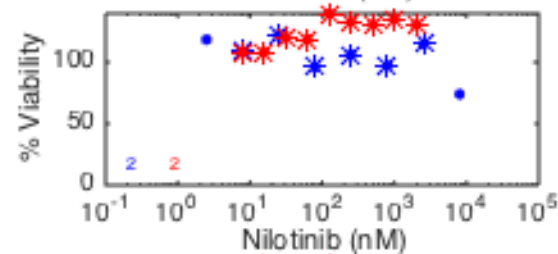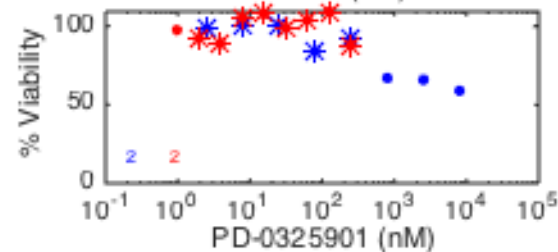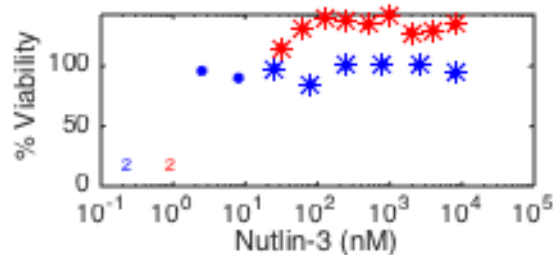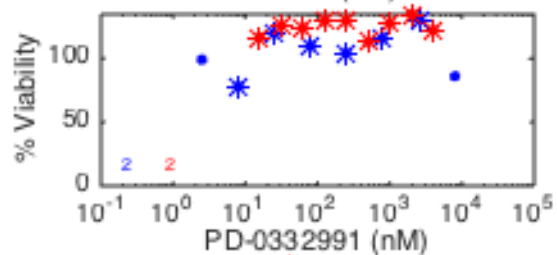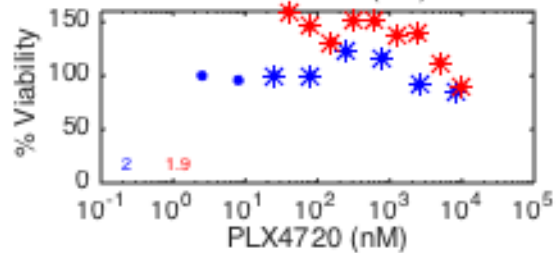

MFE-296

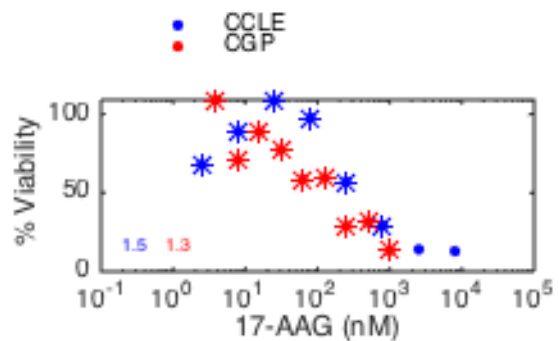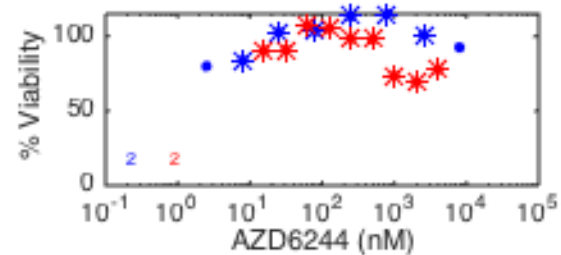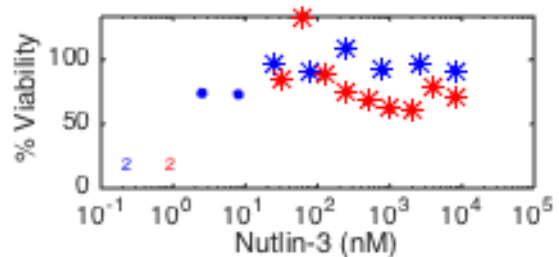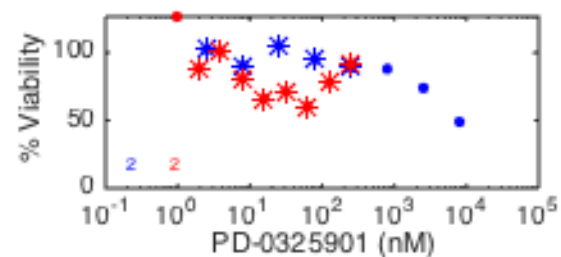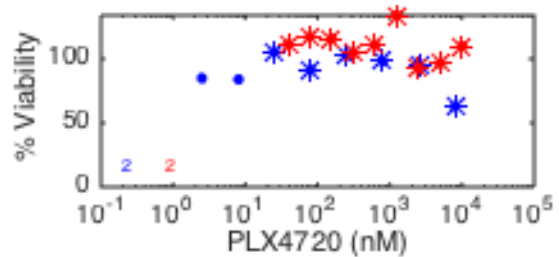



MG-63

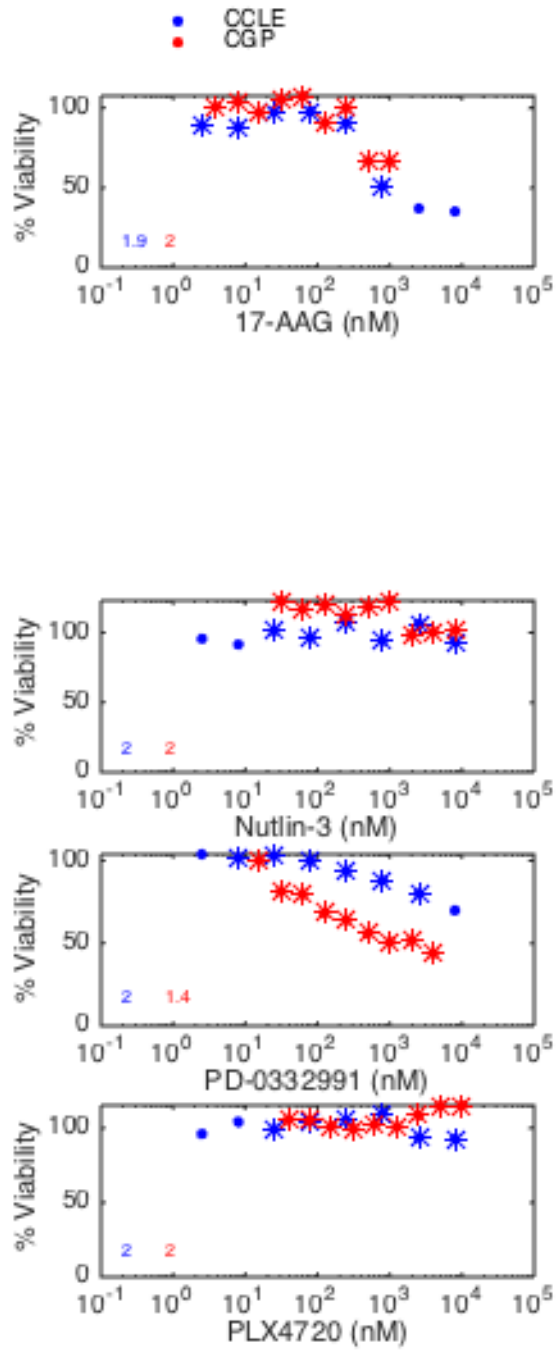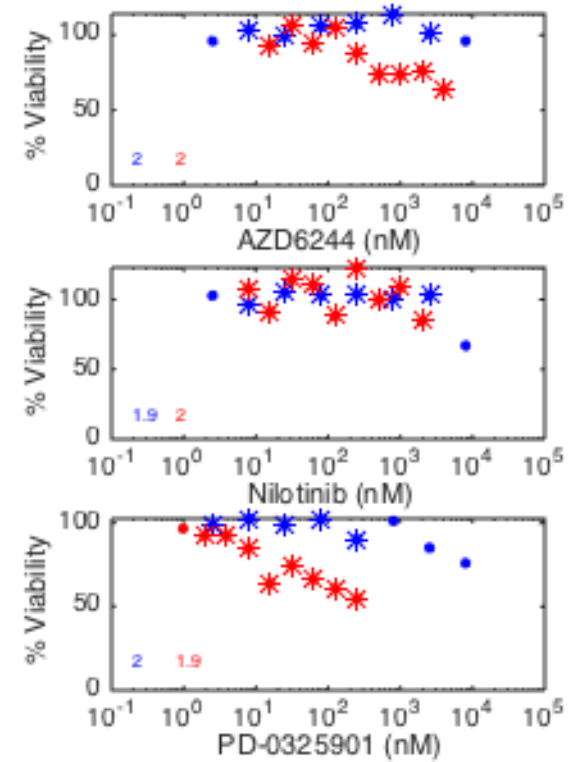

# MHH-ES-1

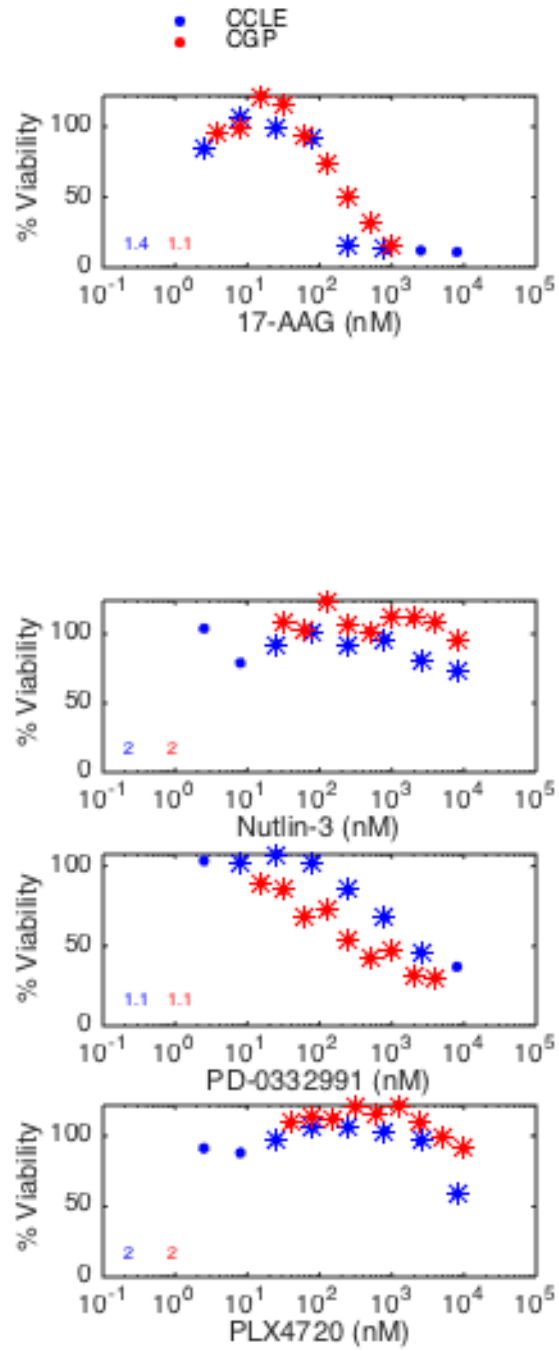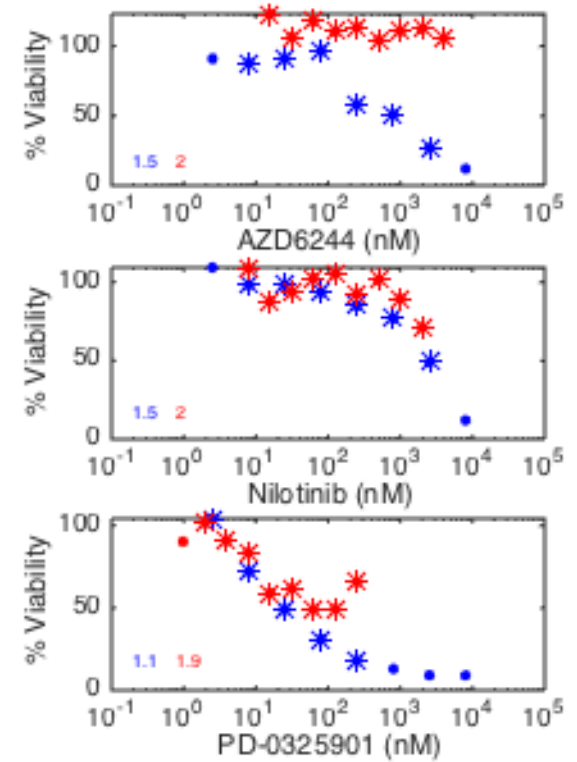

# MIA-PaCa-2

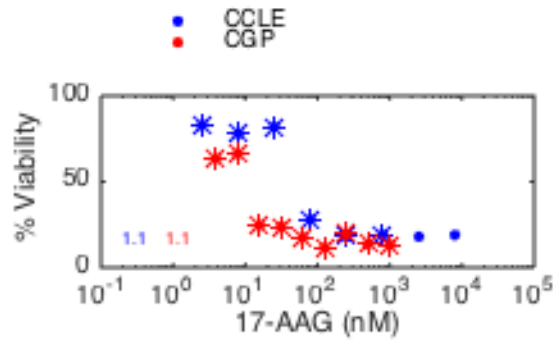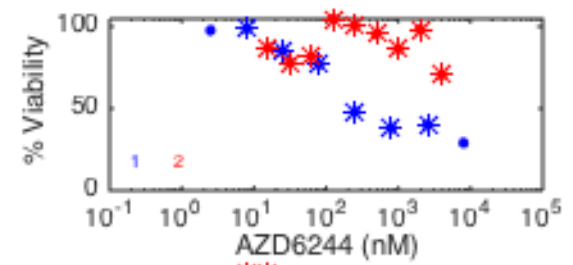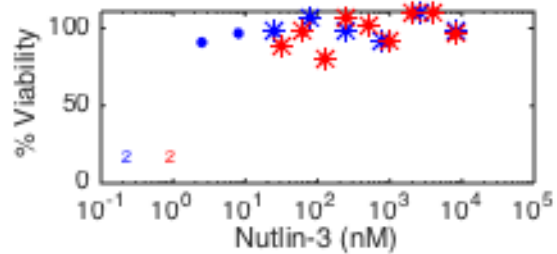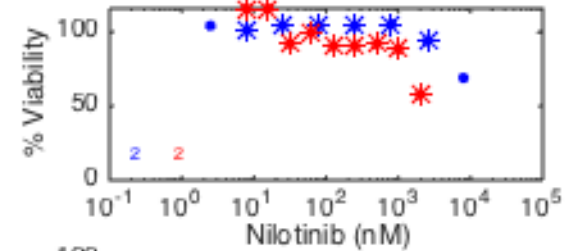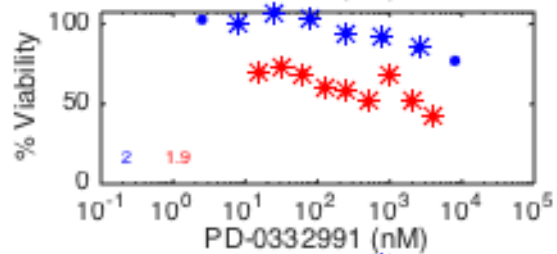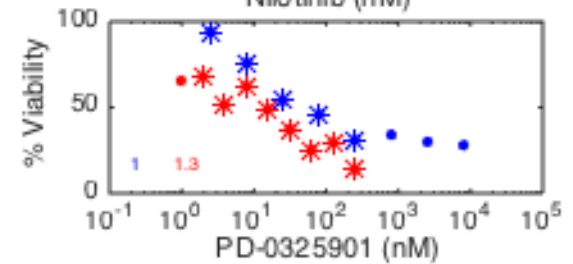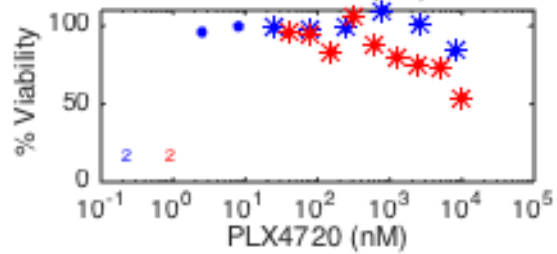

# MKN7

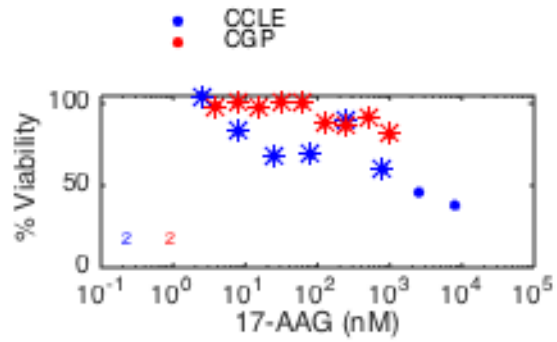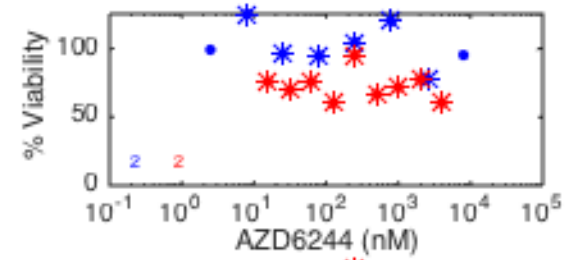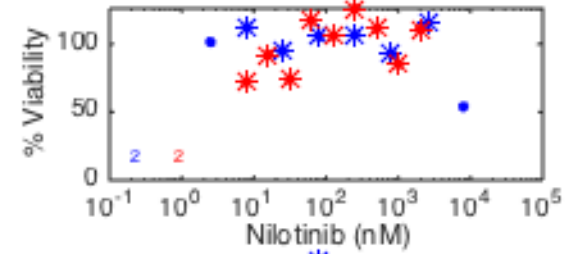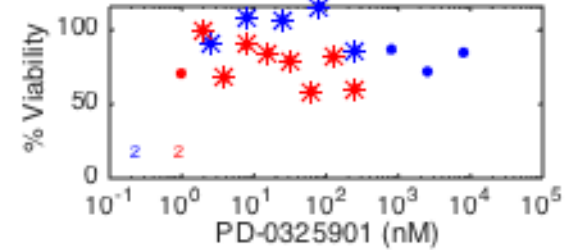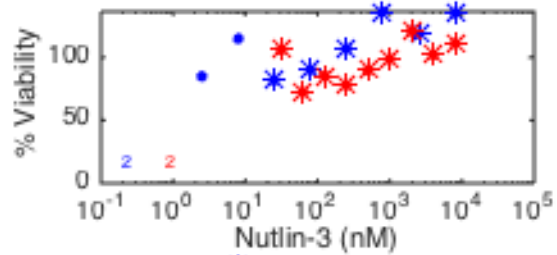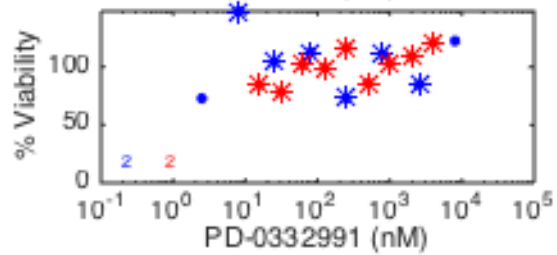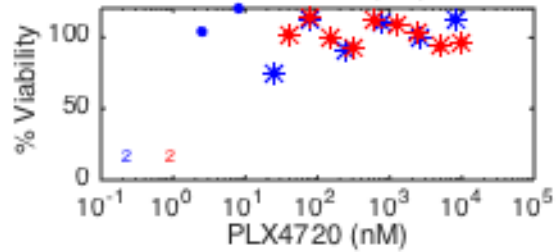

# MKN45

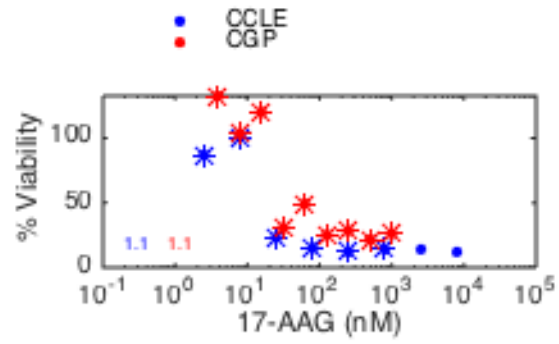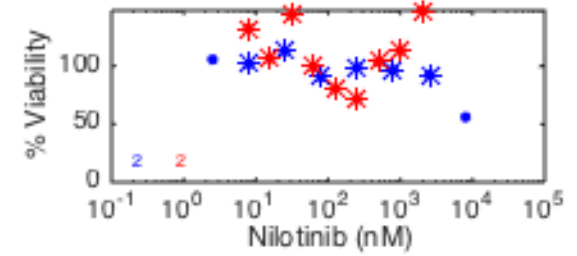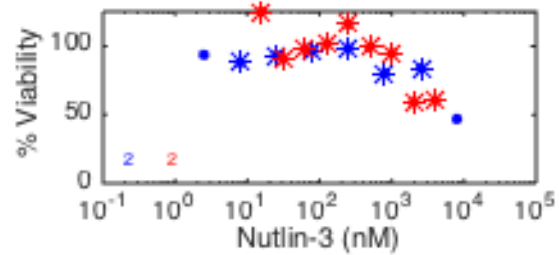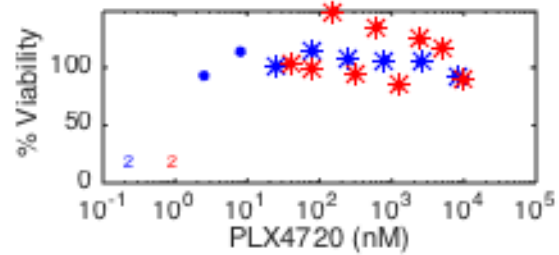

# MOLT-16

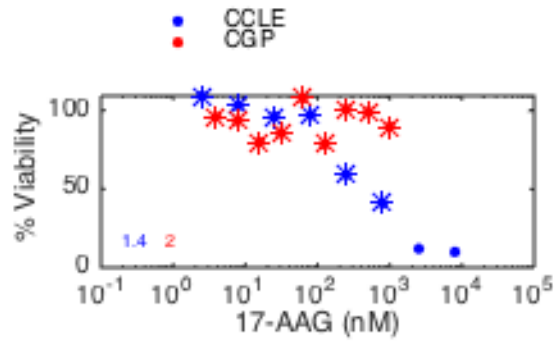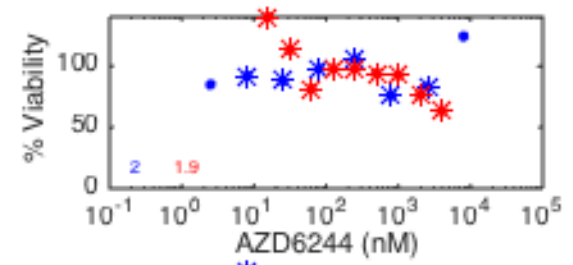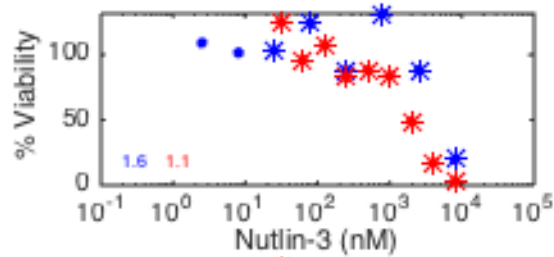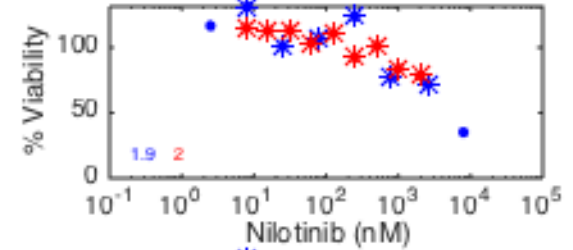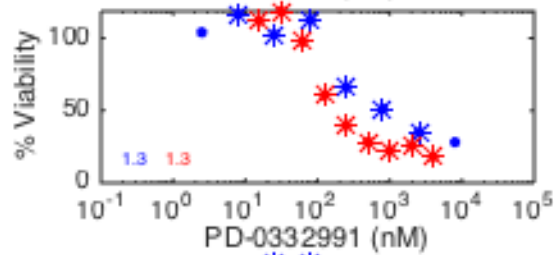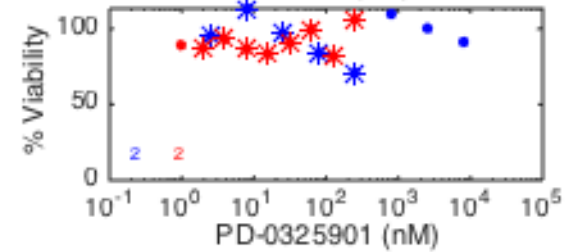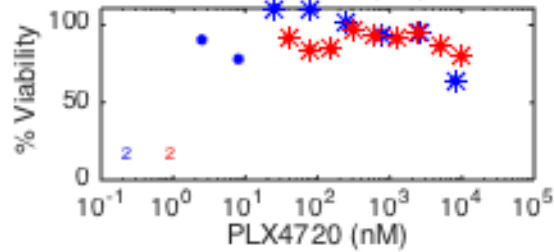

# MPP-89

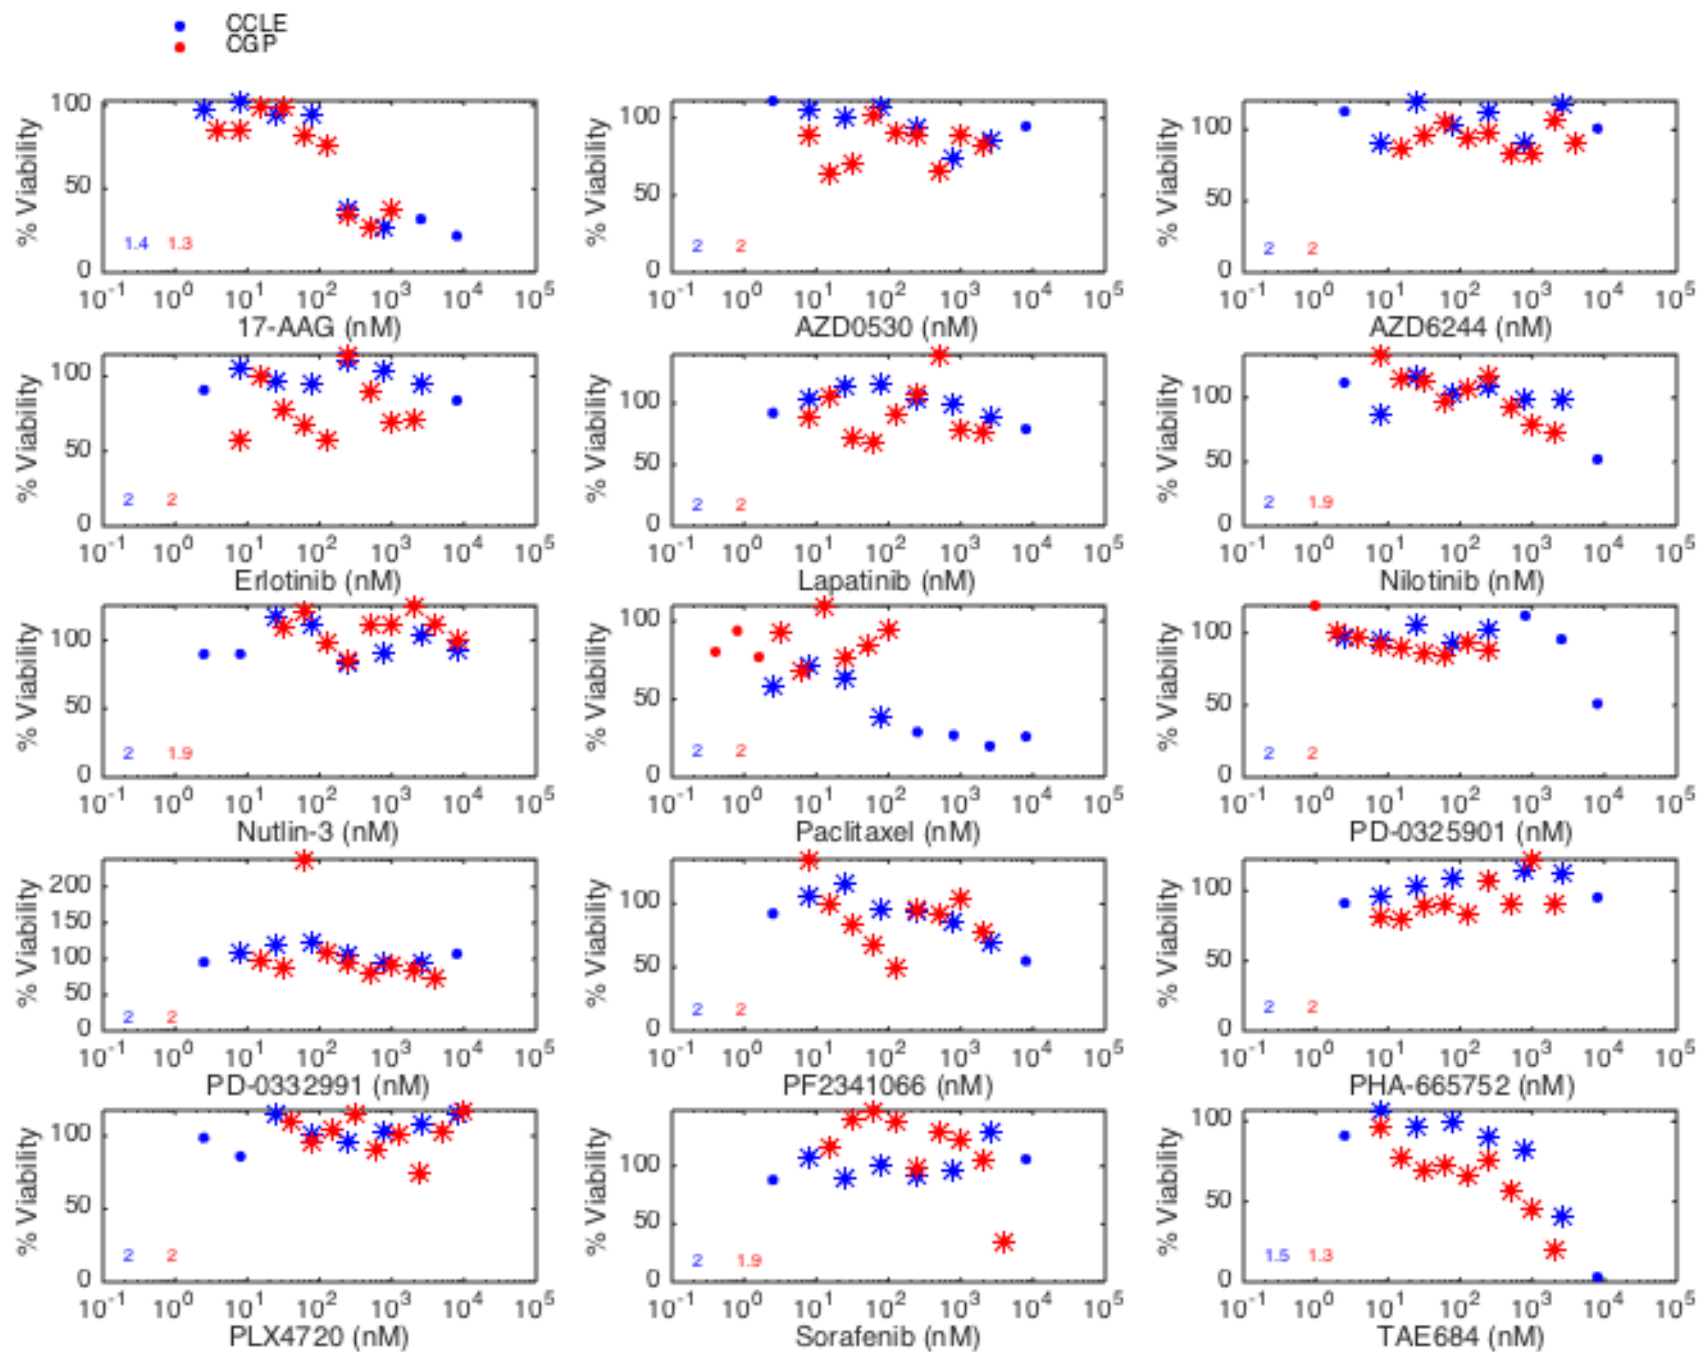

# MSTO-211H

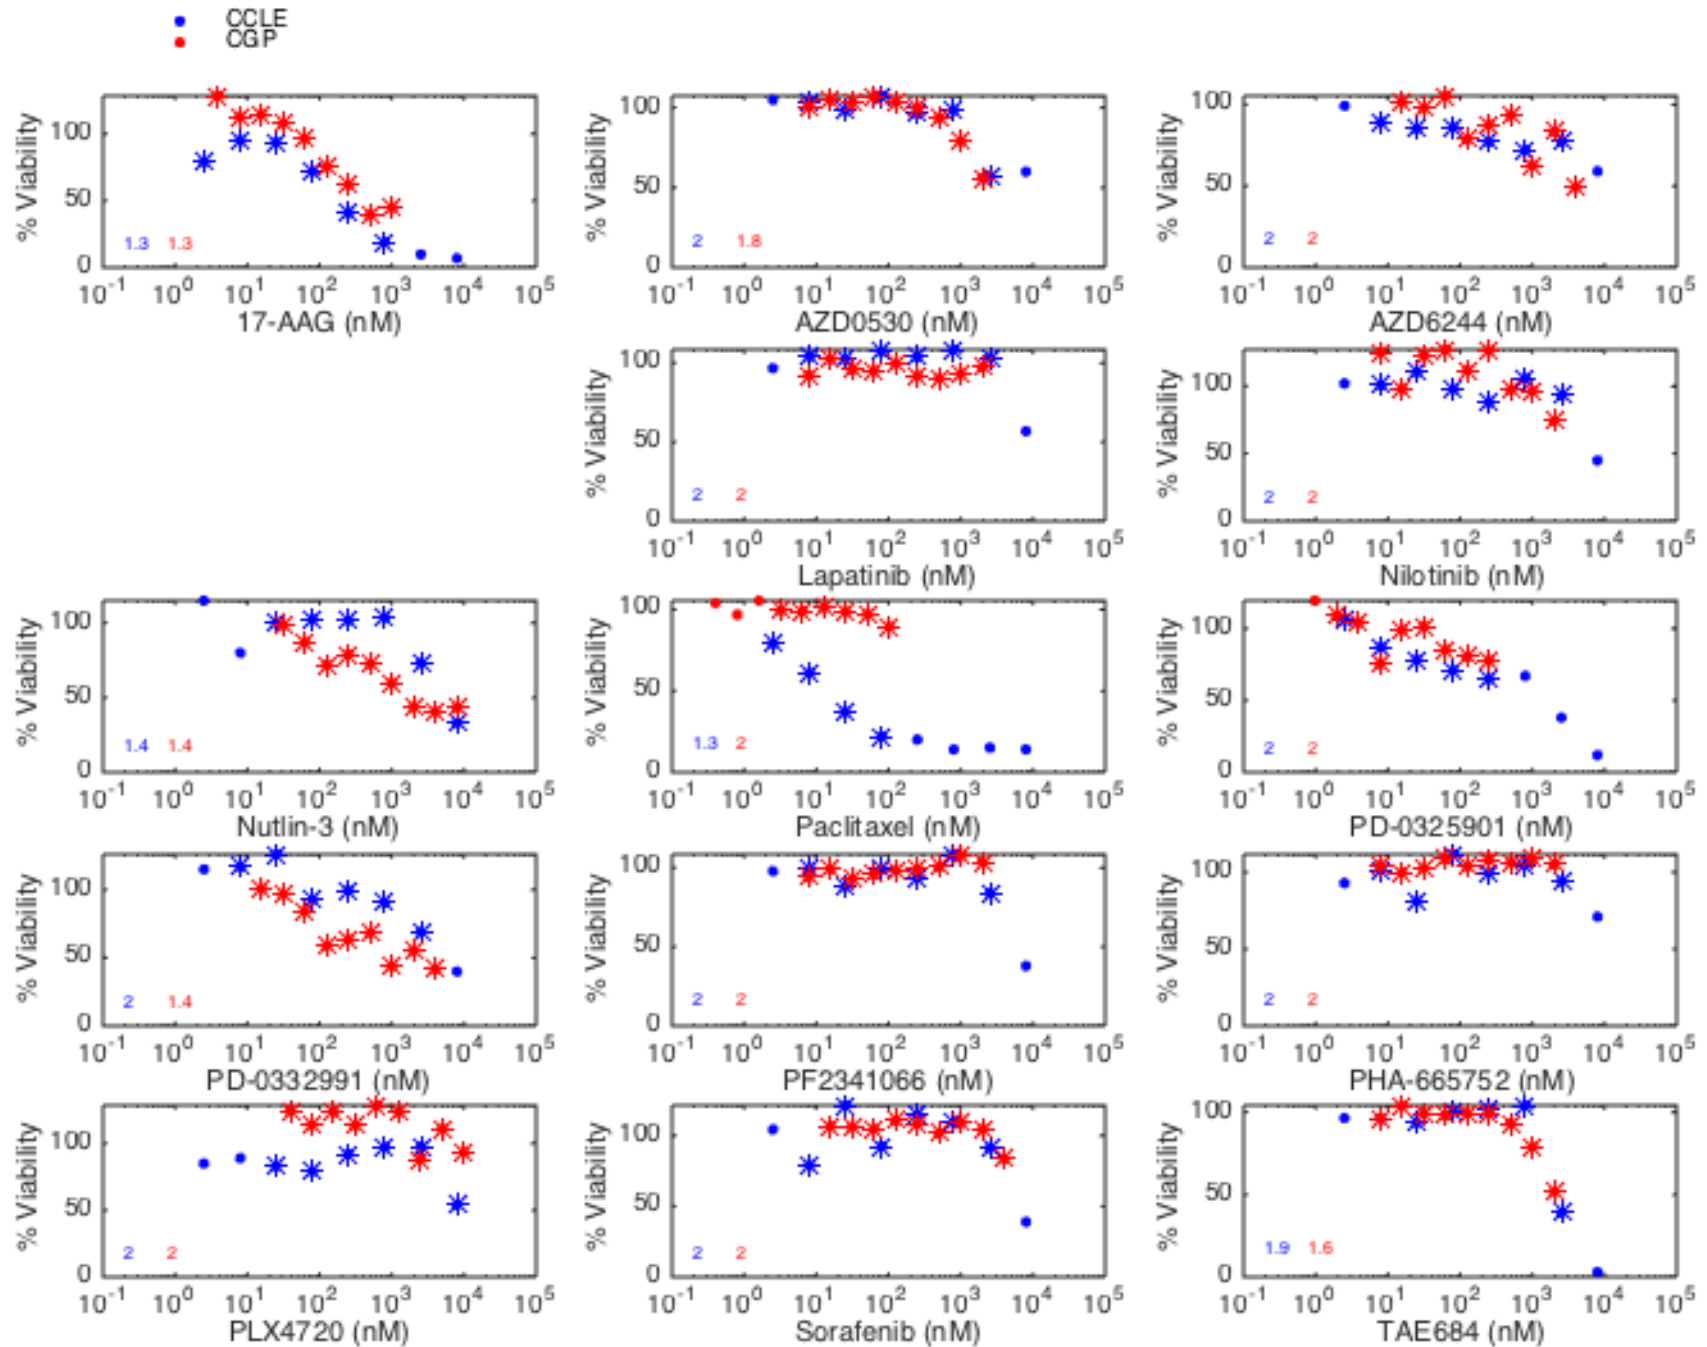



# NCI-H23

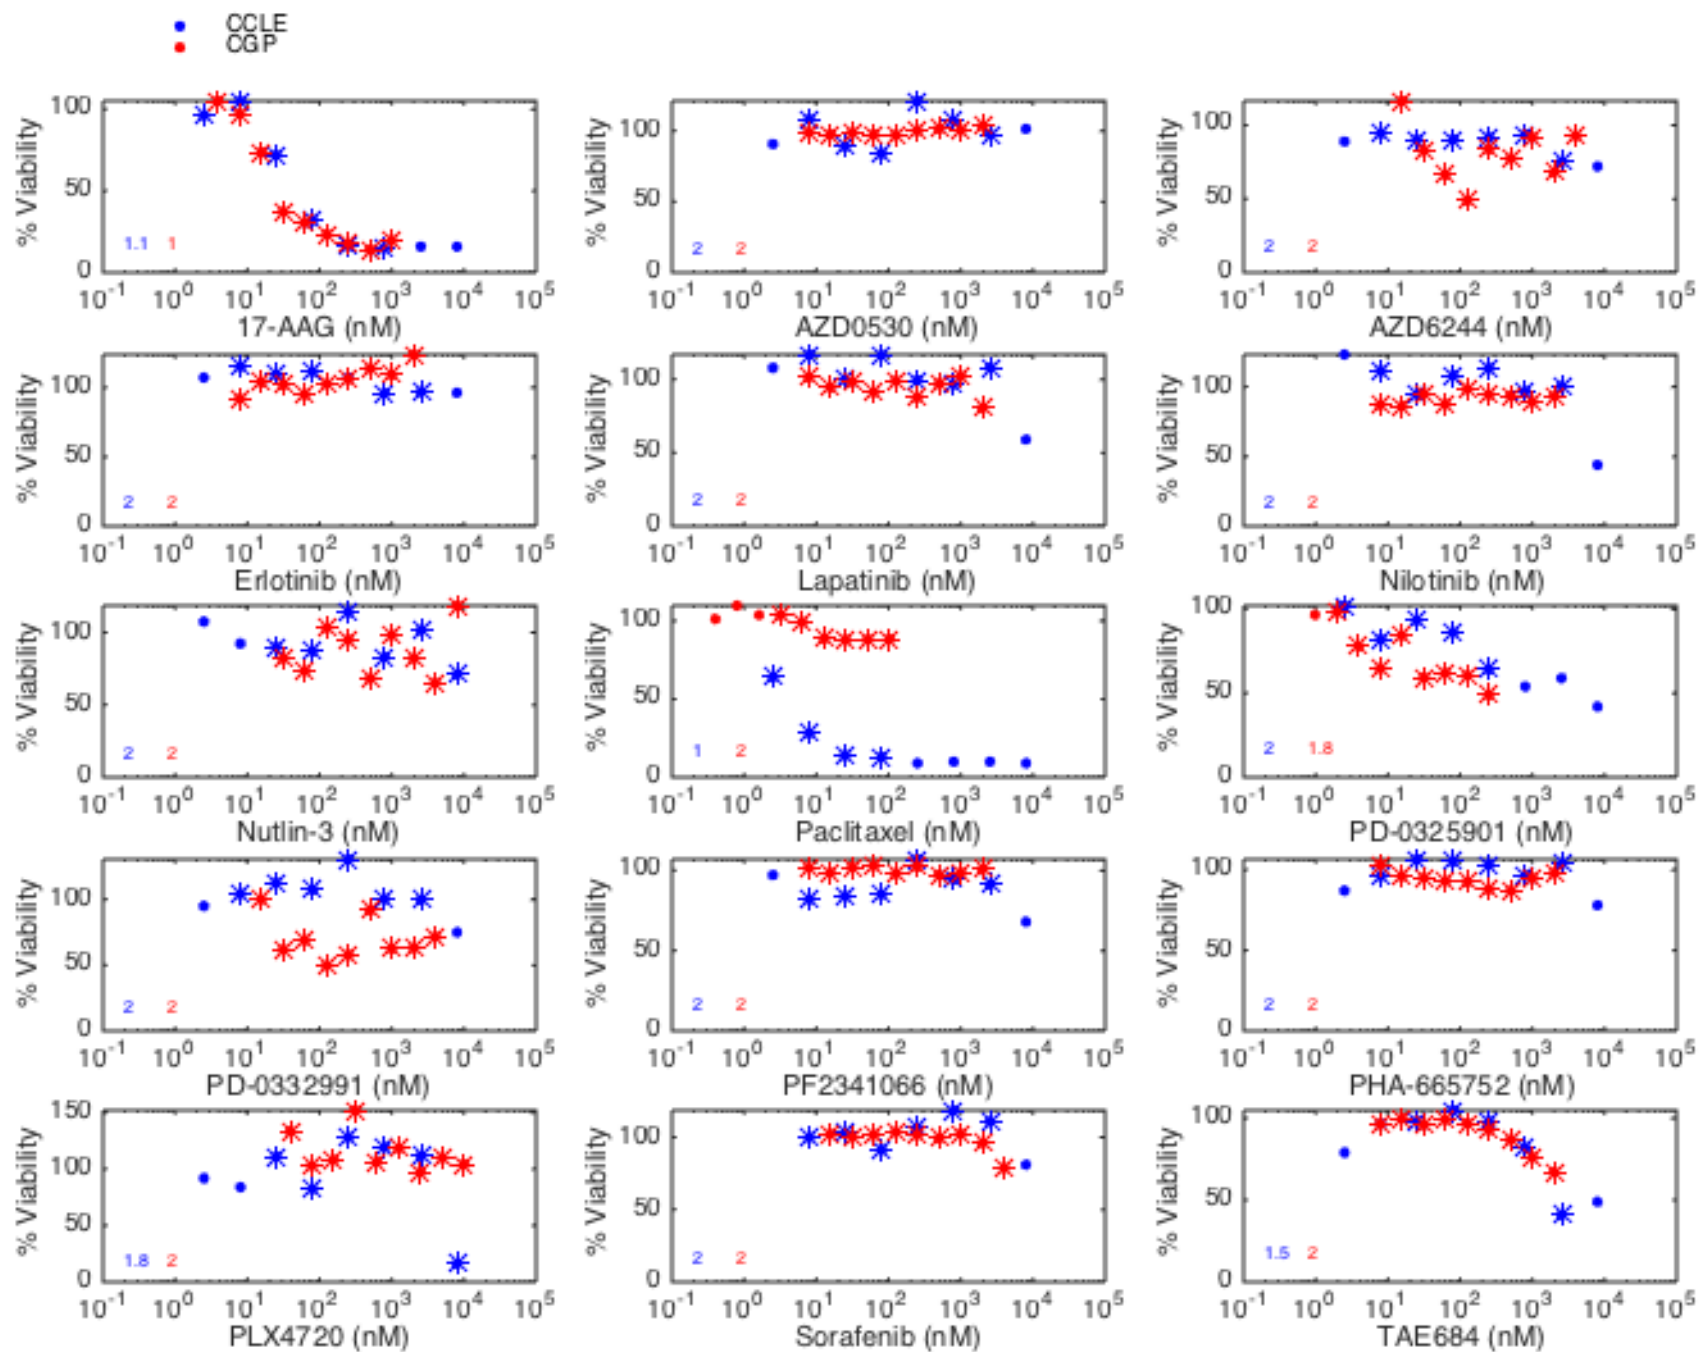

NCI-H28

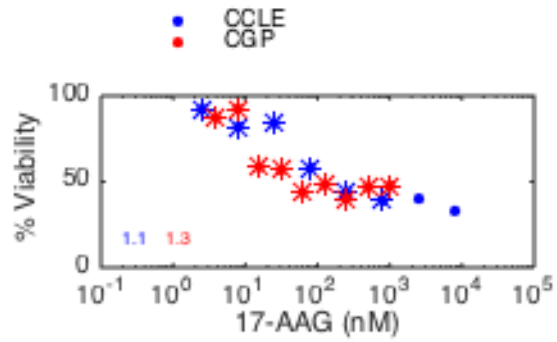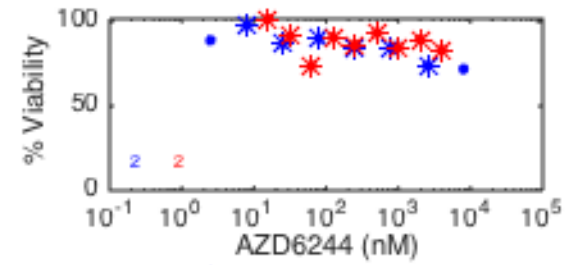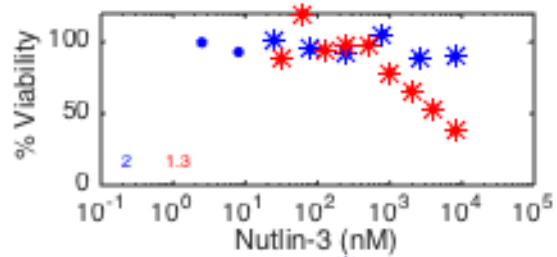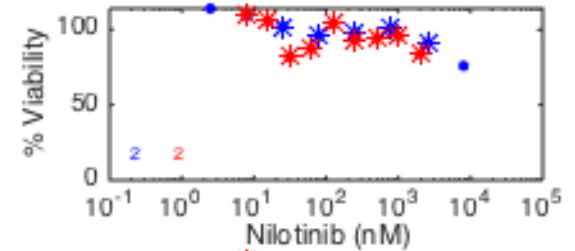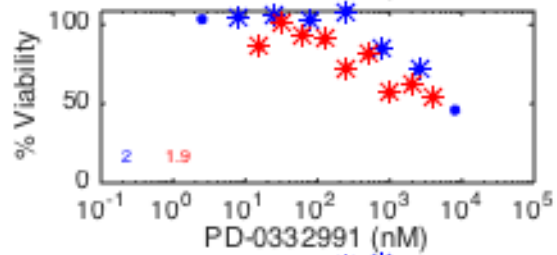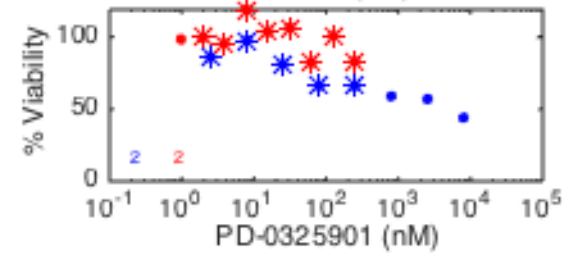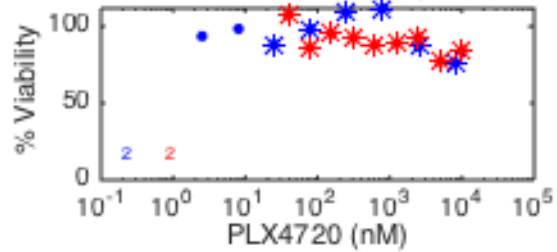

# NCI-H226

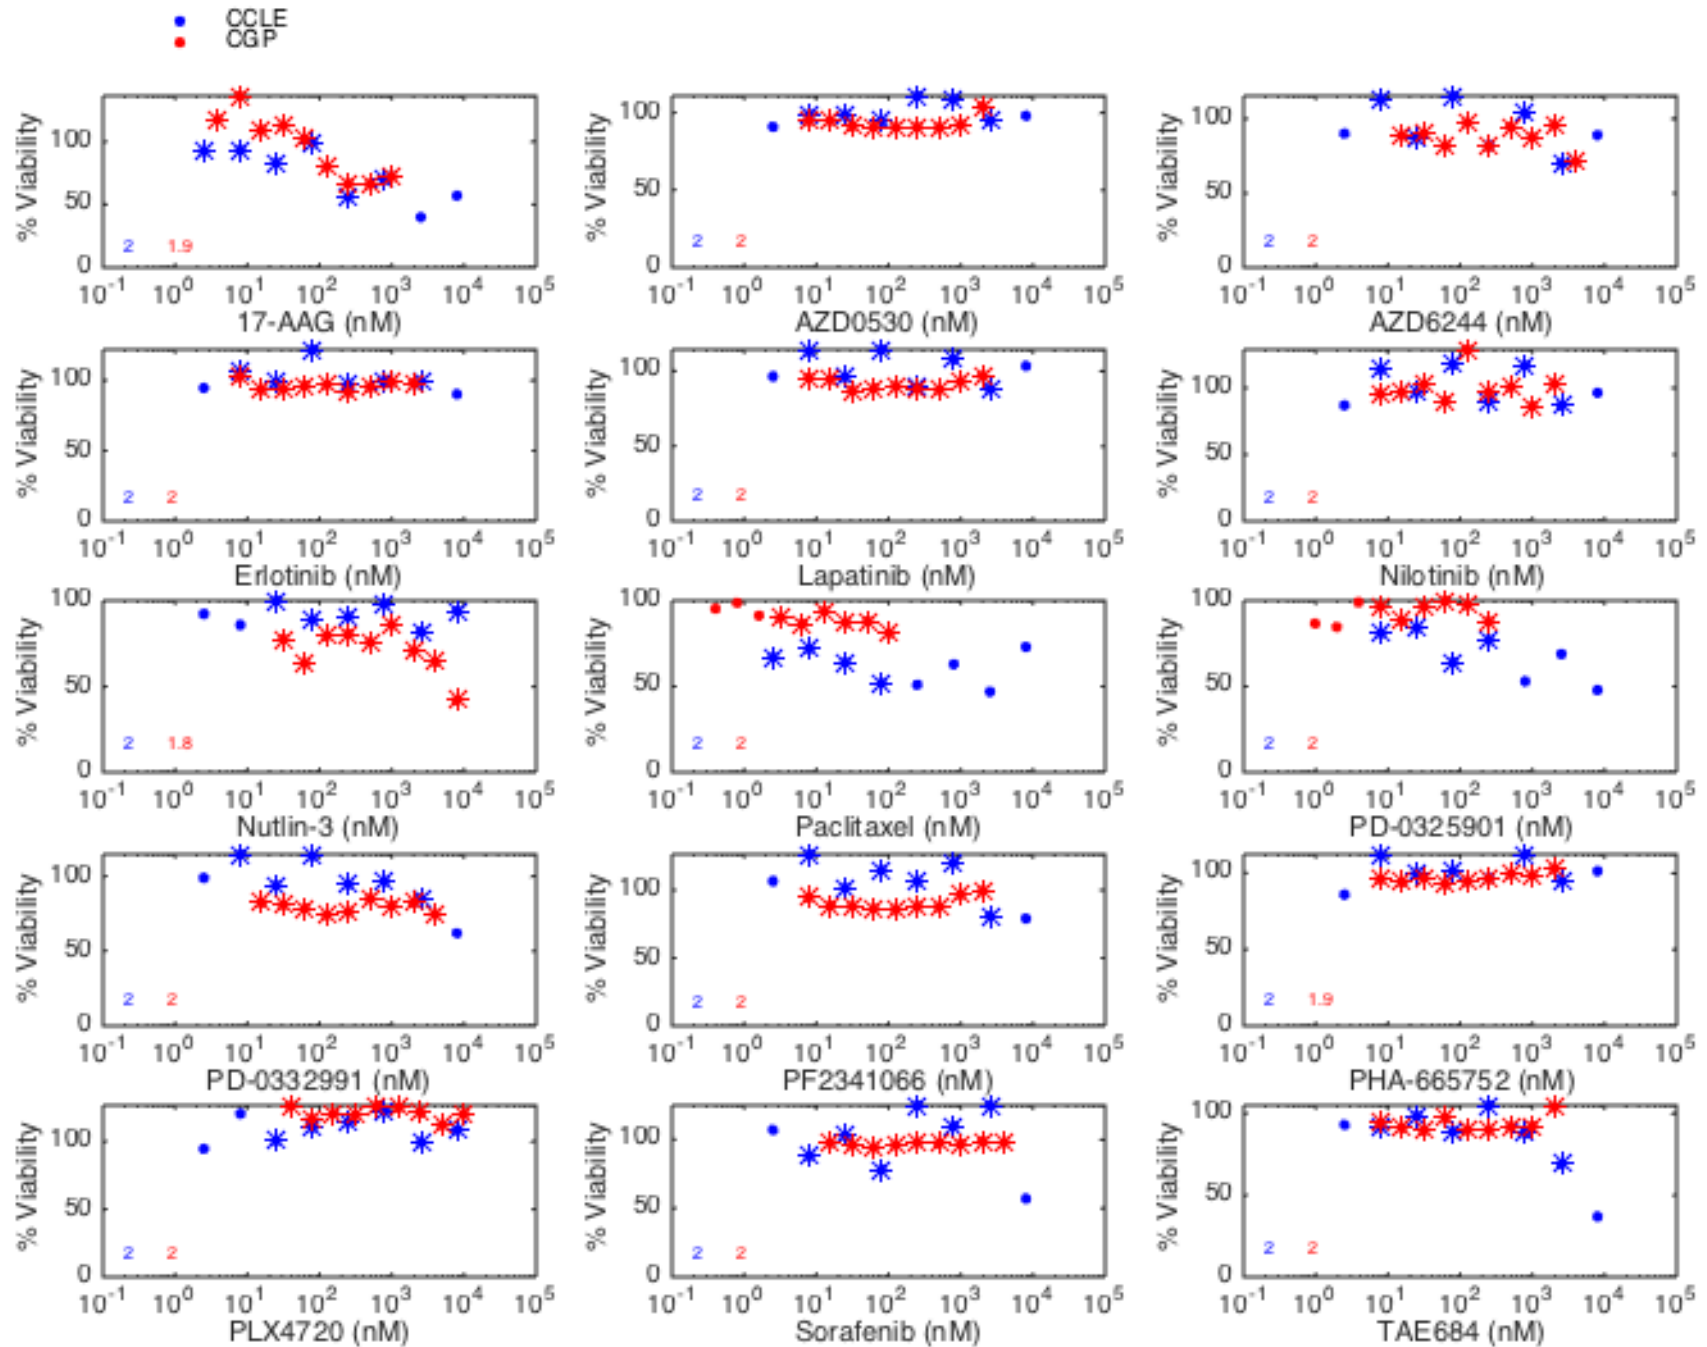

NCI-H358

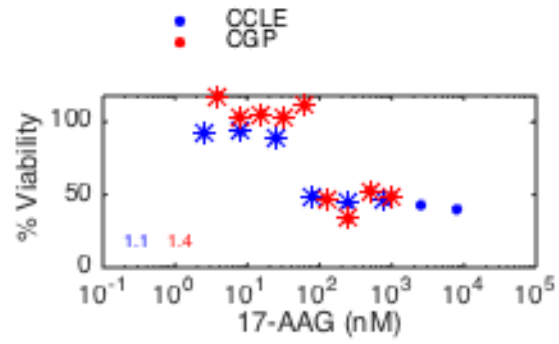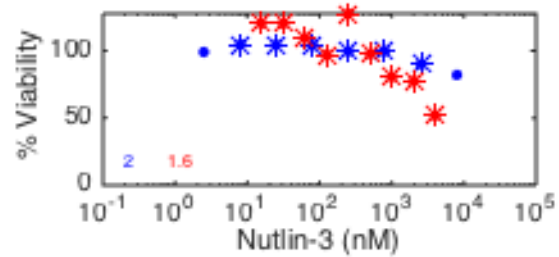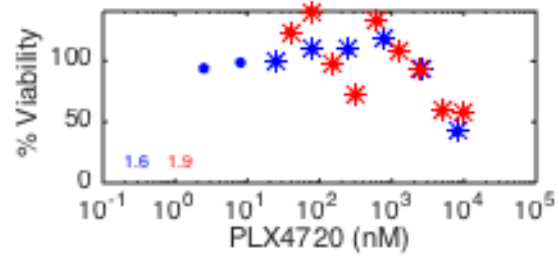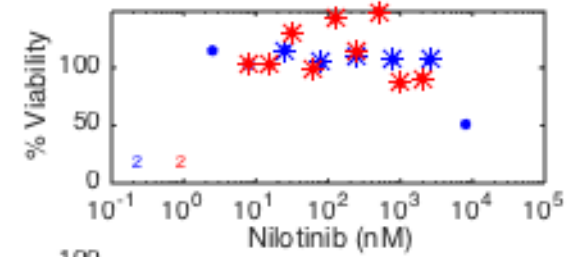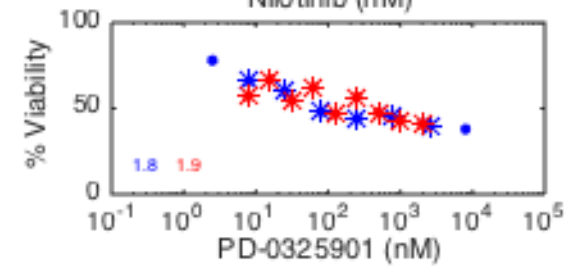

# NCI-H441

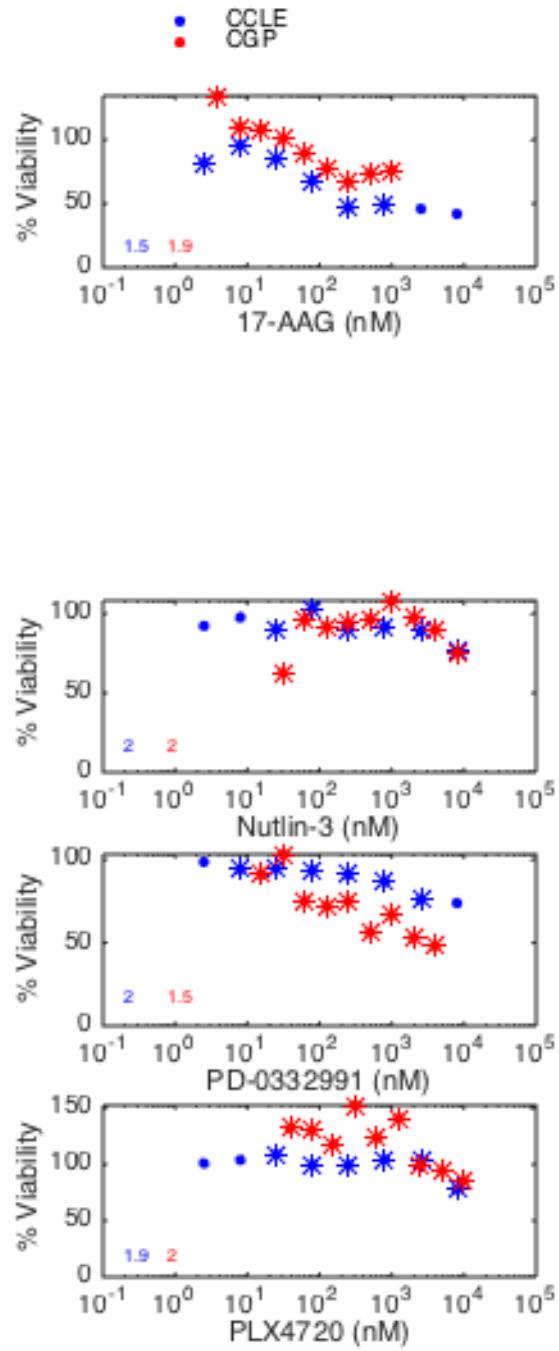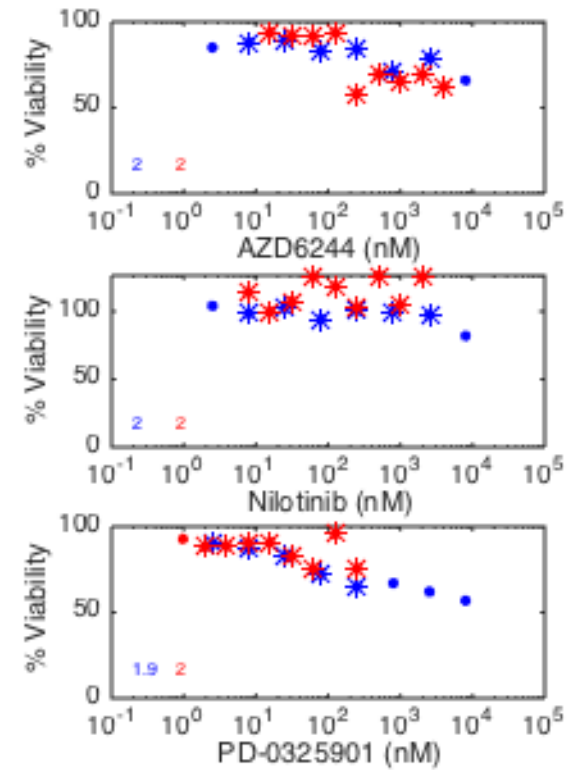

# NCI-H460

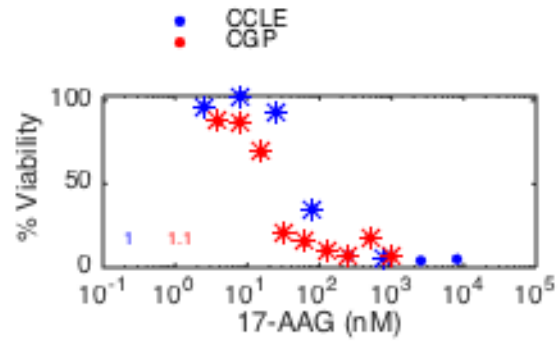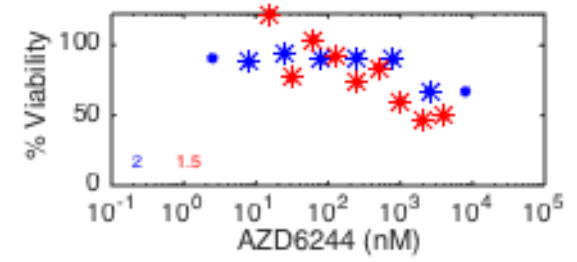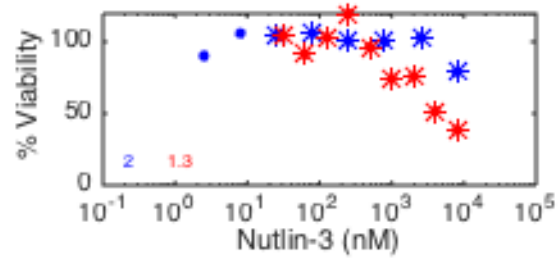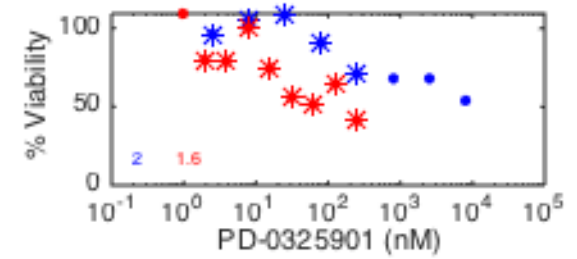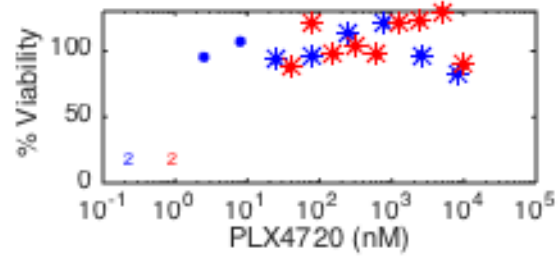

# NCI-H520

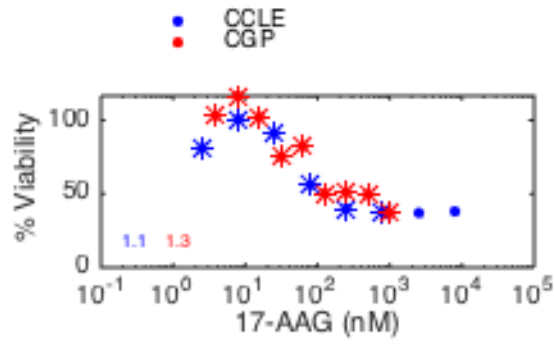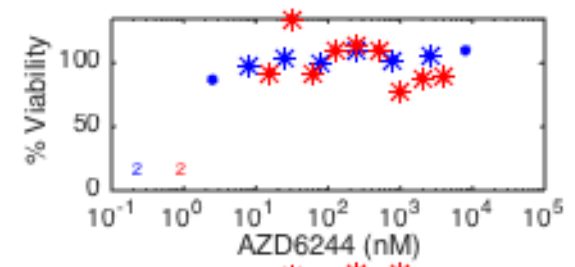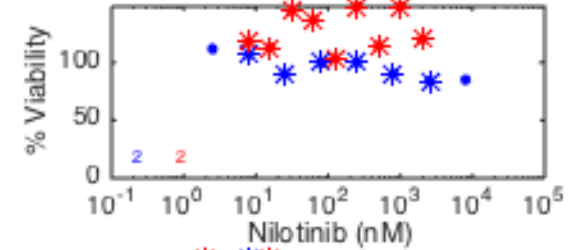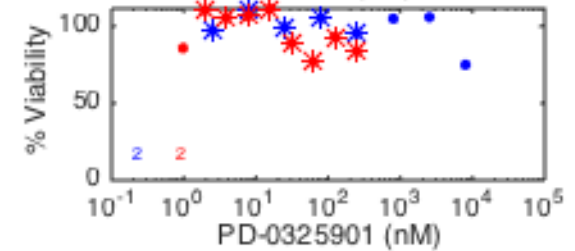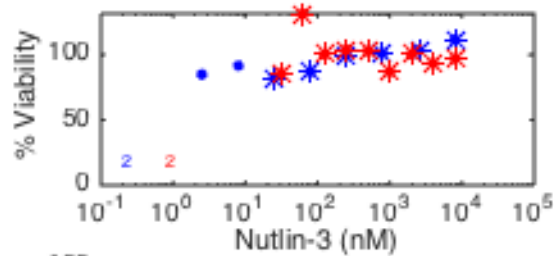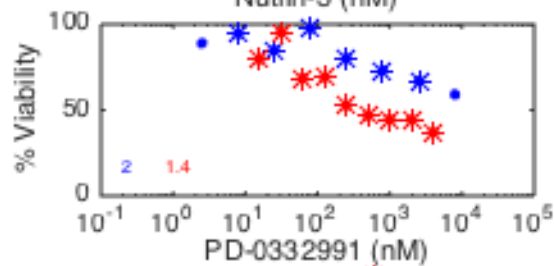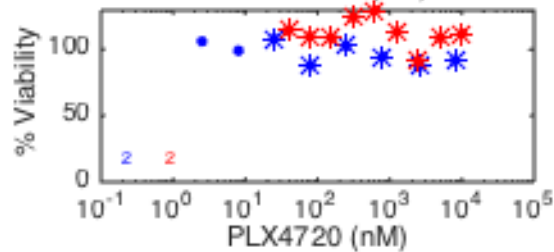

# NCI-H522

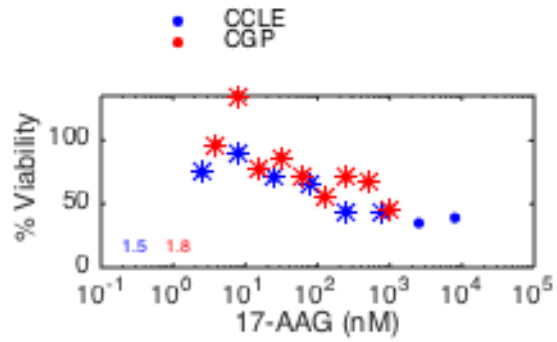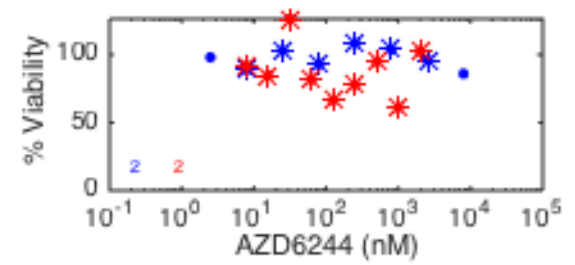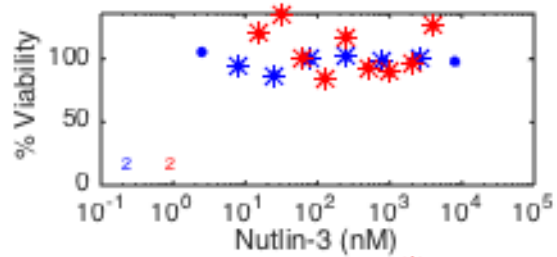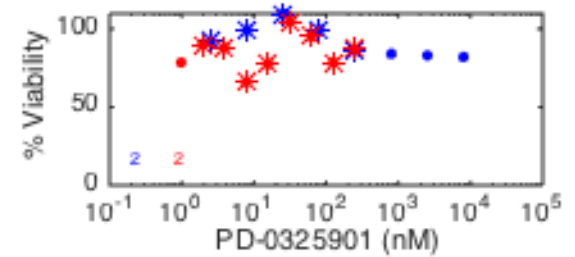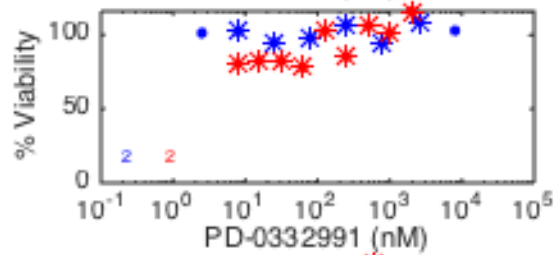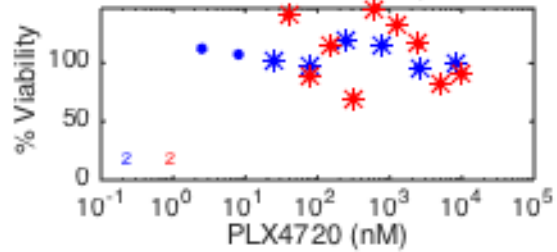



NCI-H650

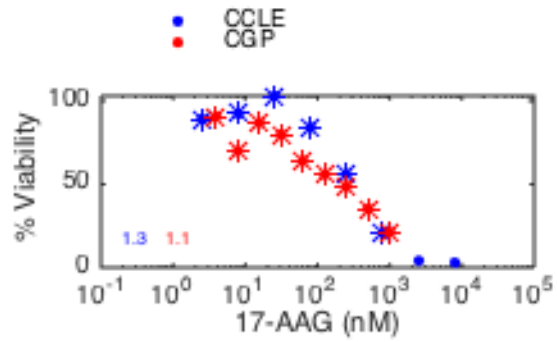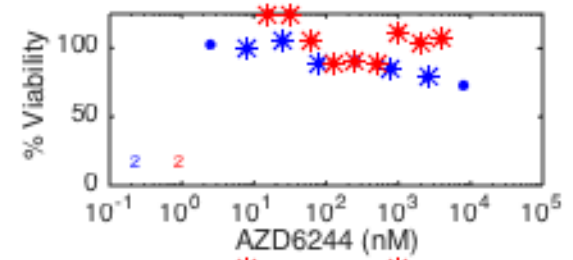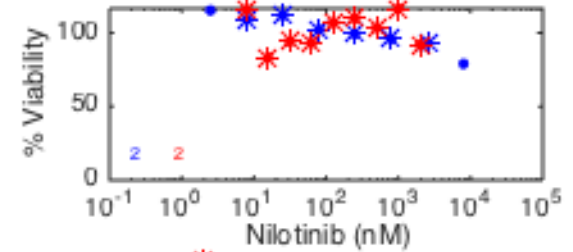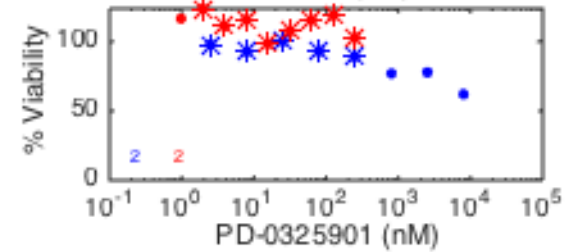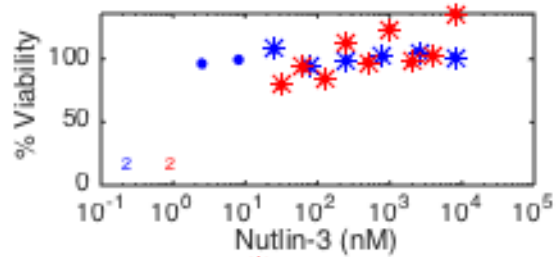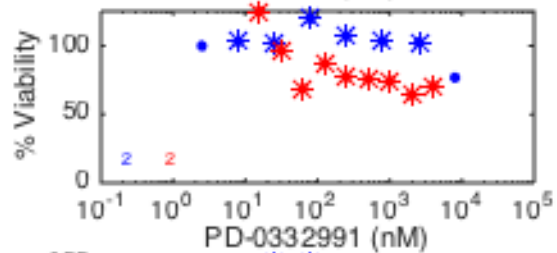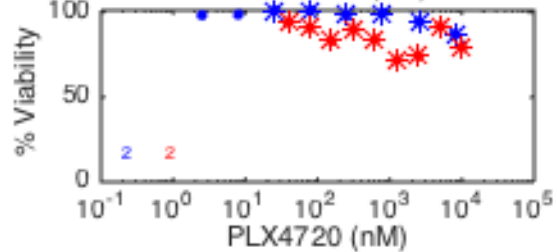

NCI-H661

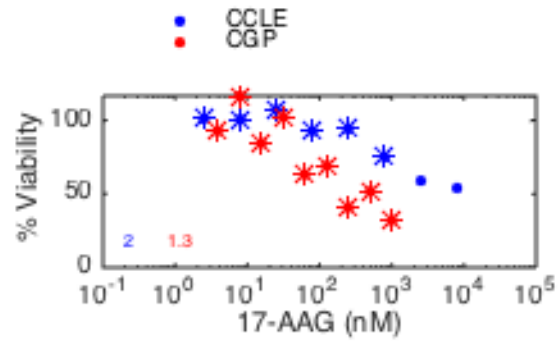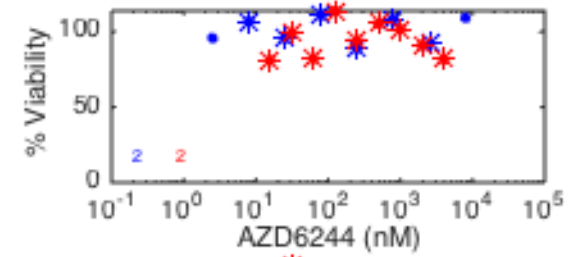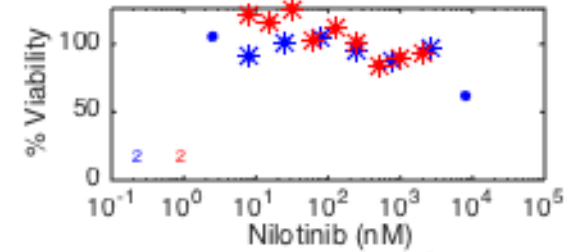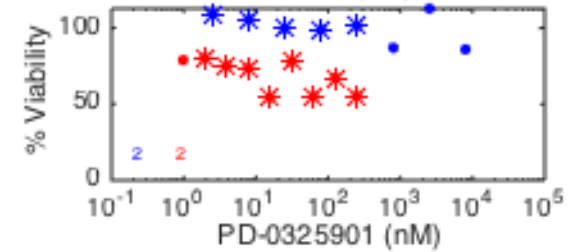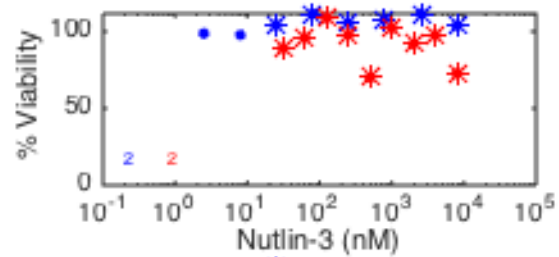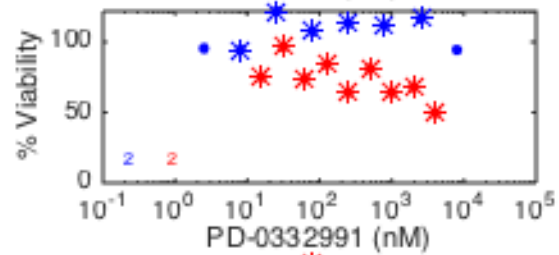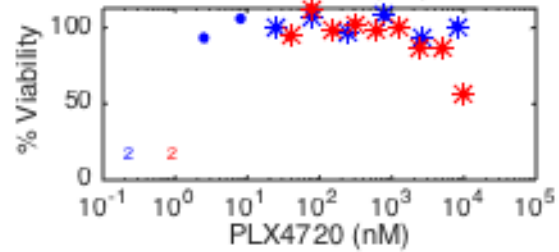

# NCI-H727

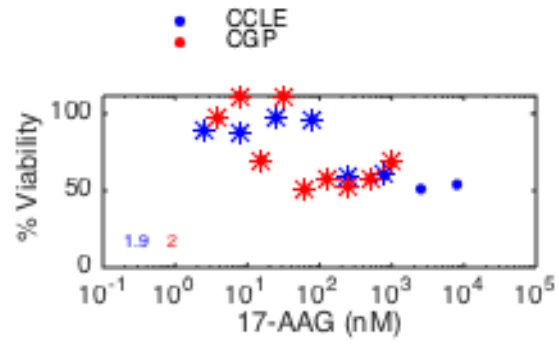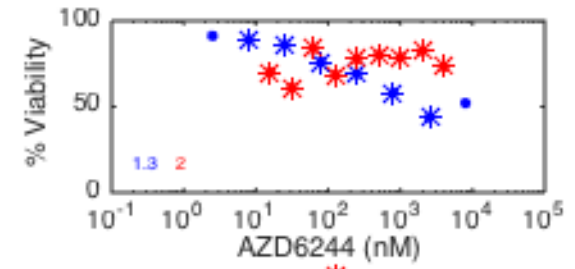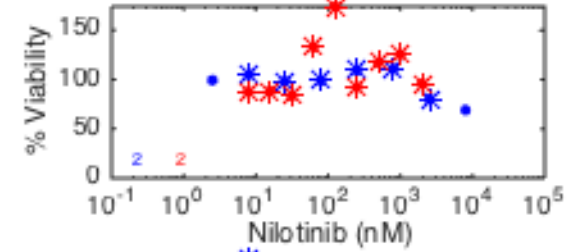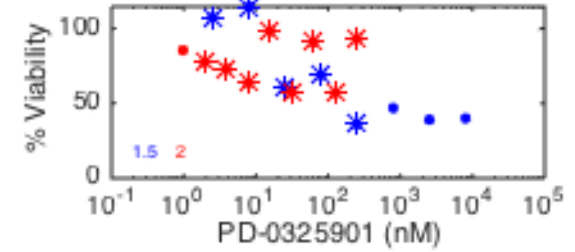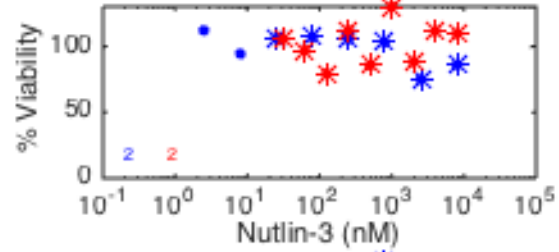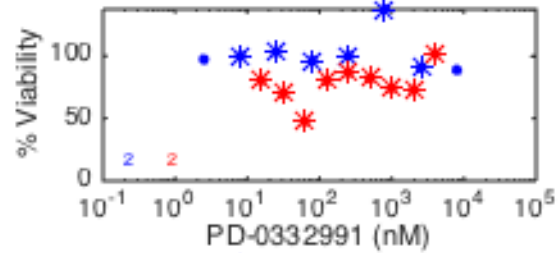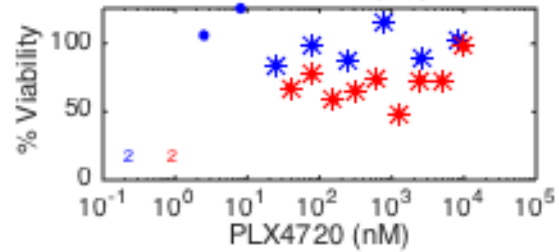

# NCI-H747

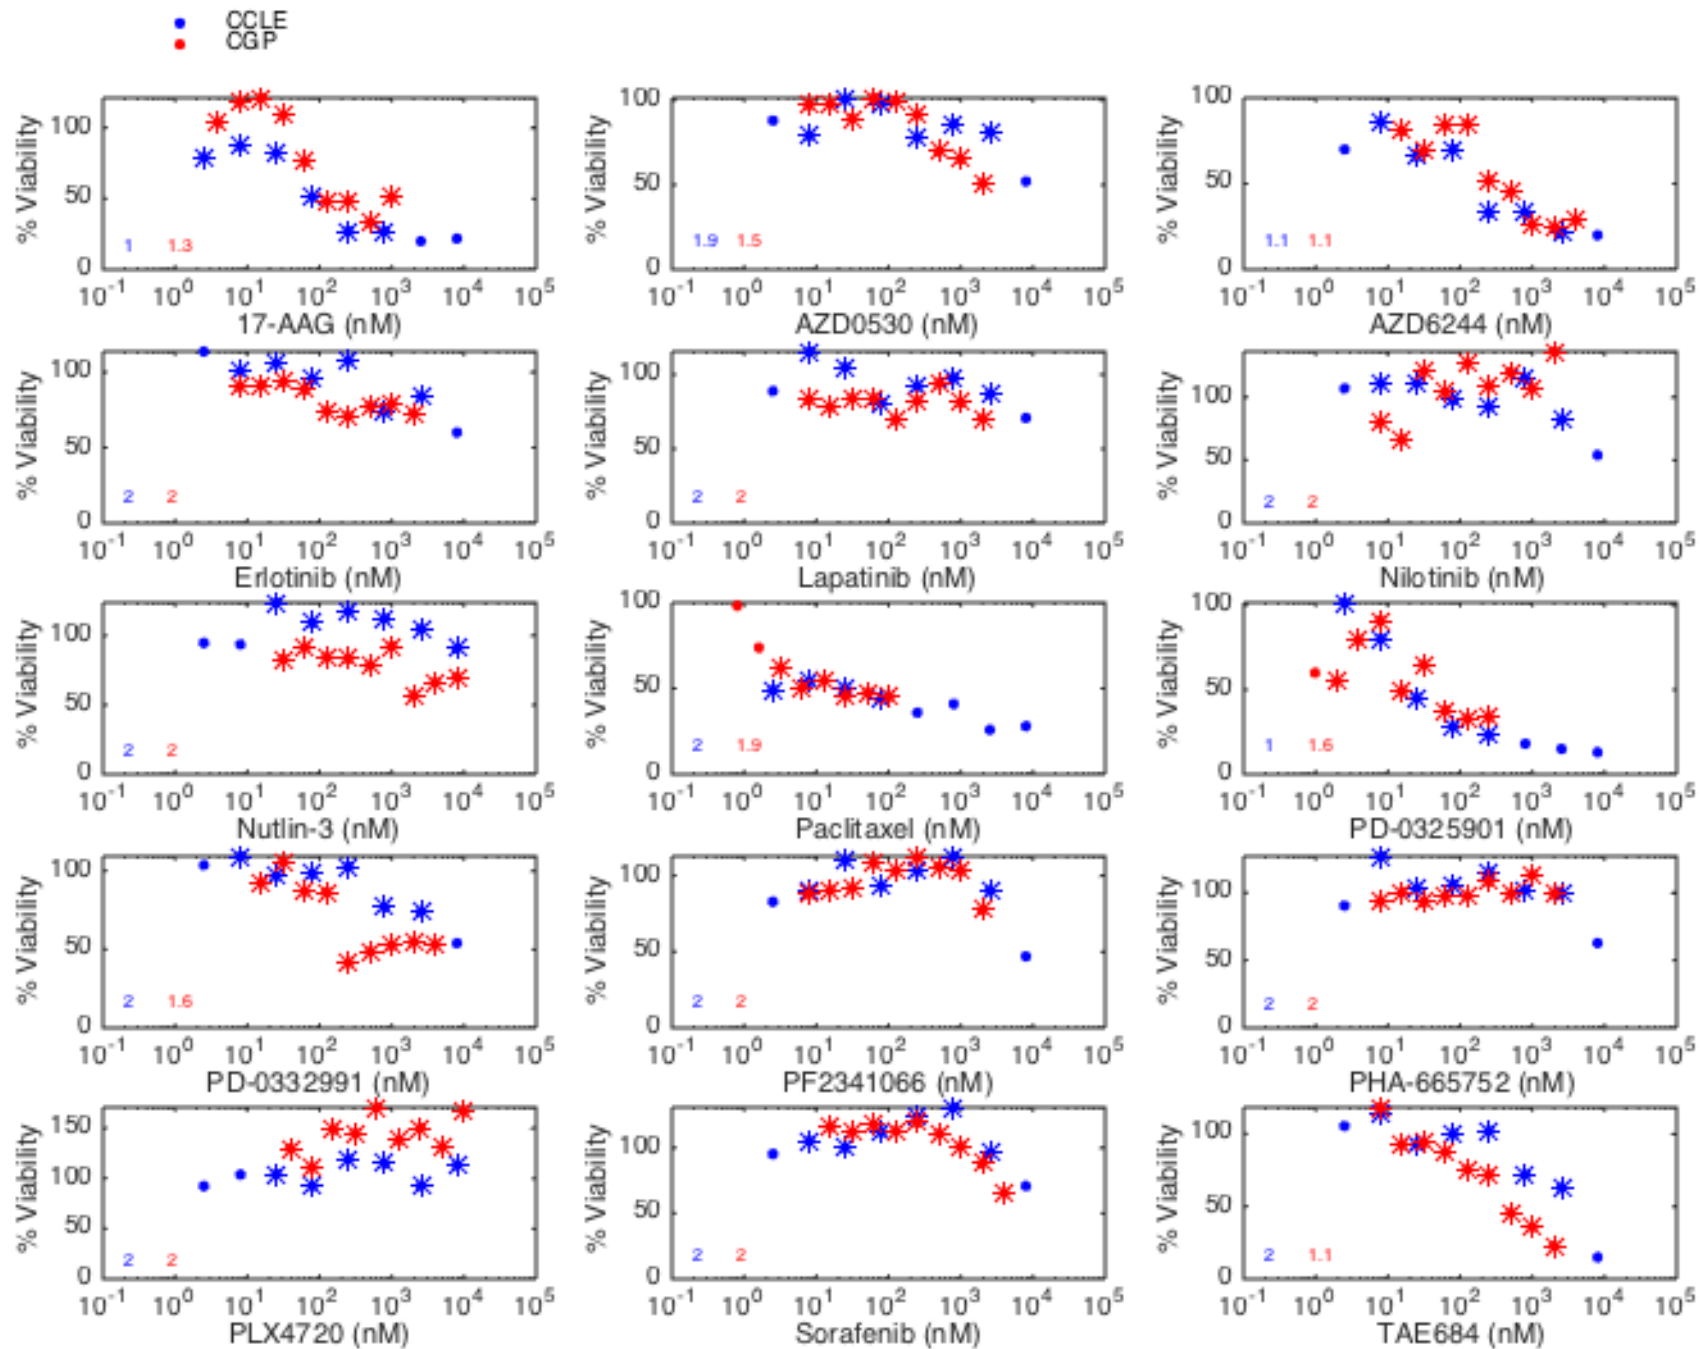

# NCI-H810

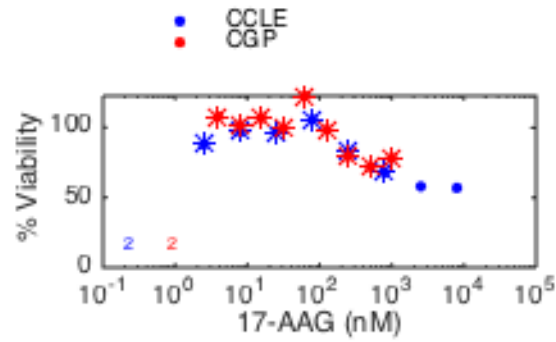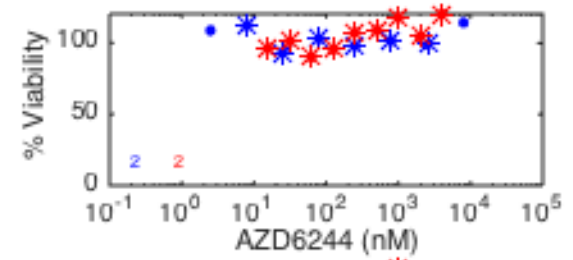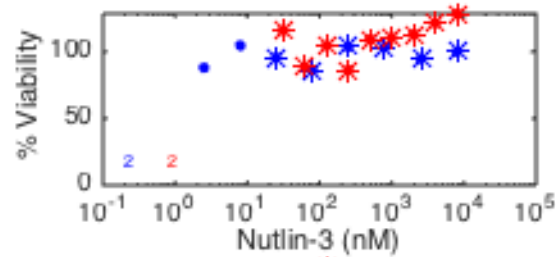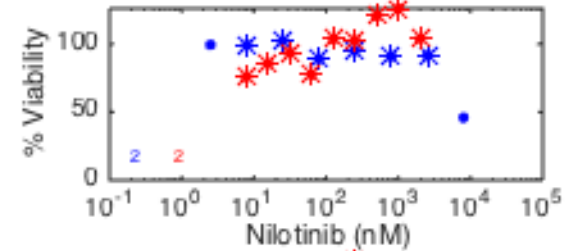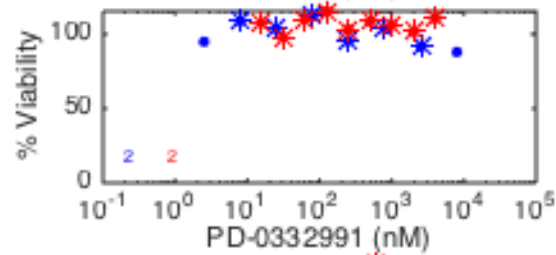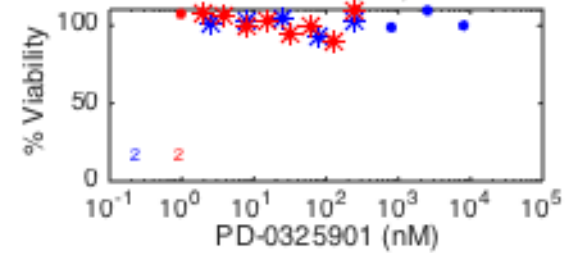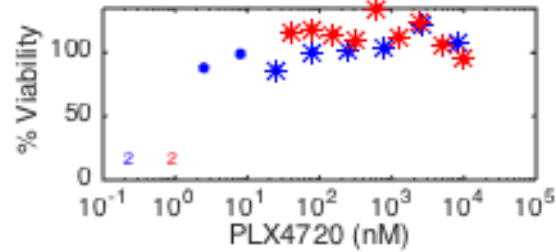

NCI-H1048

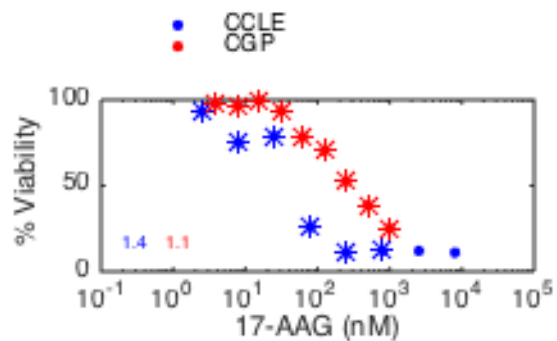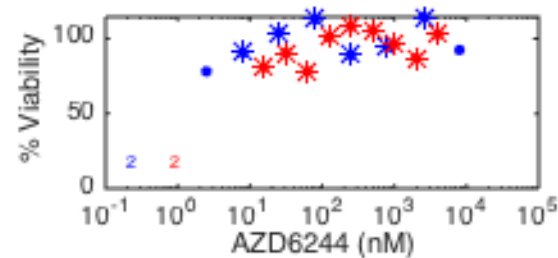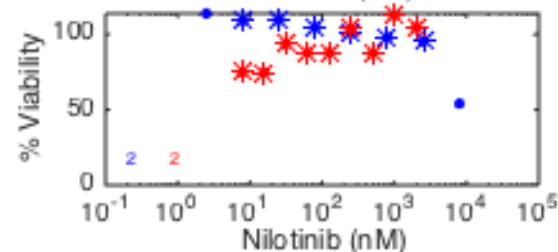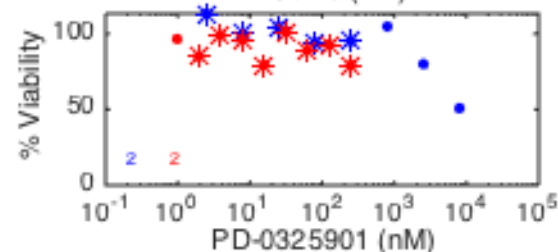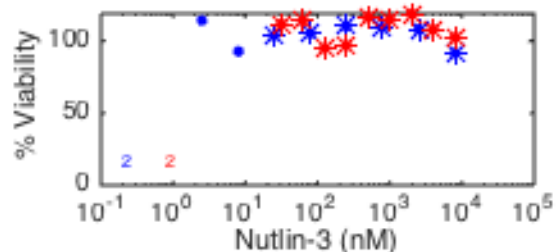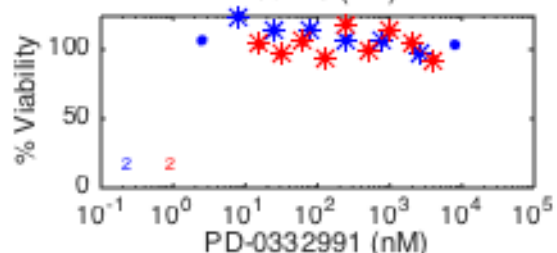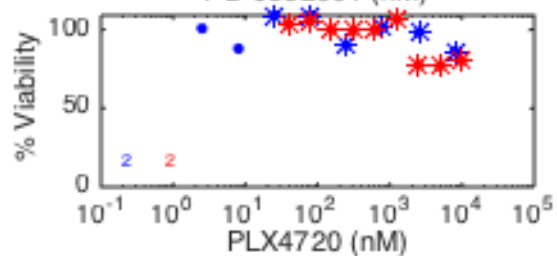

# NCI-H1092

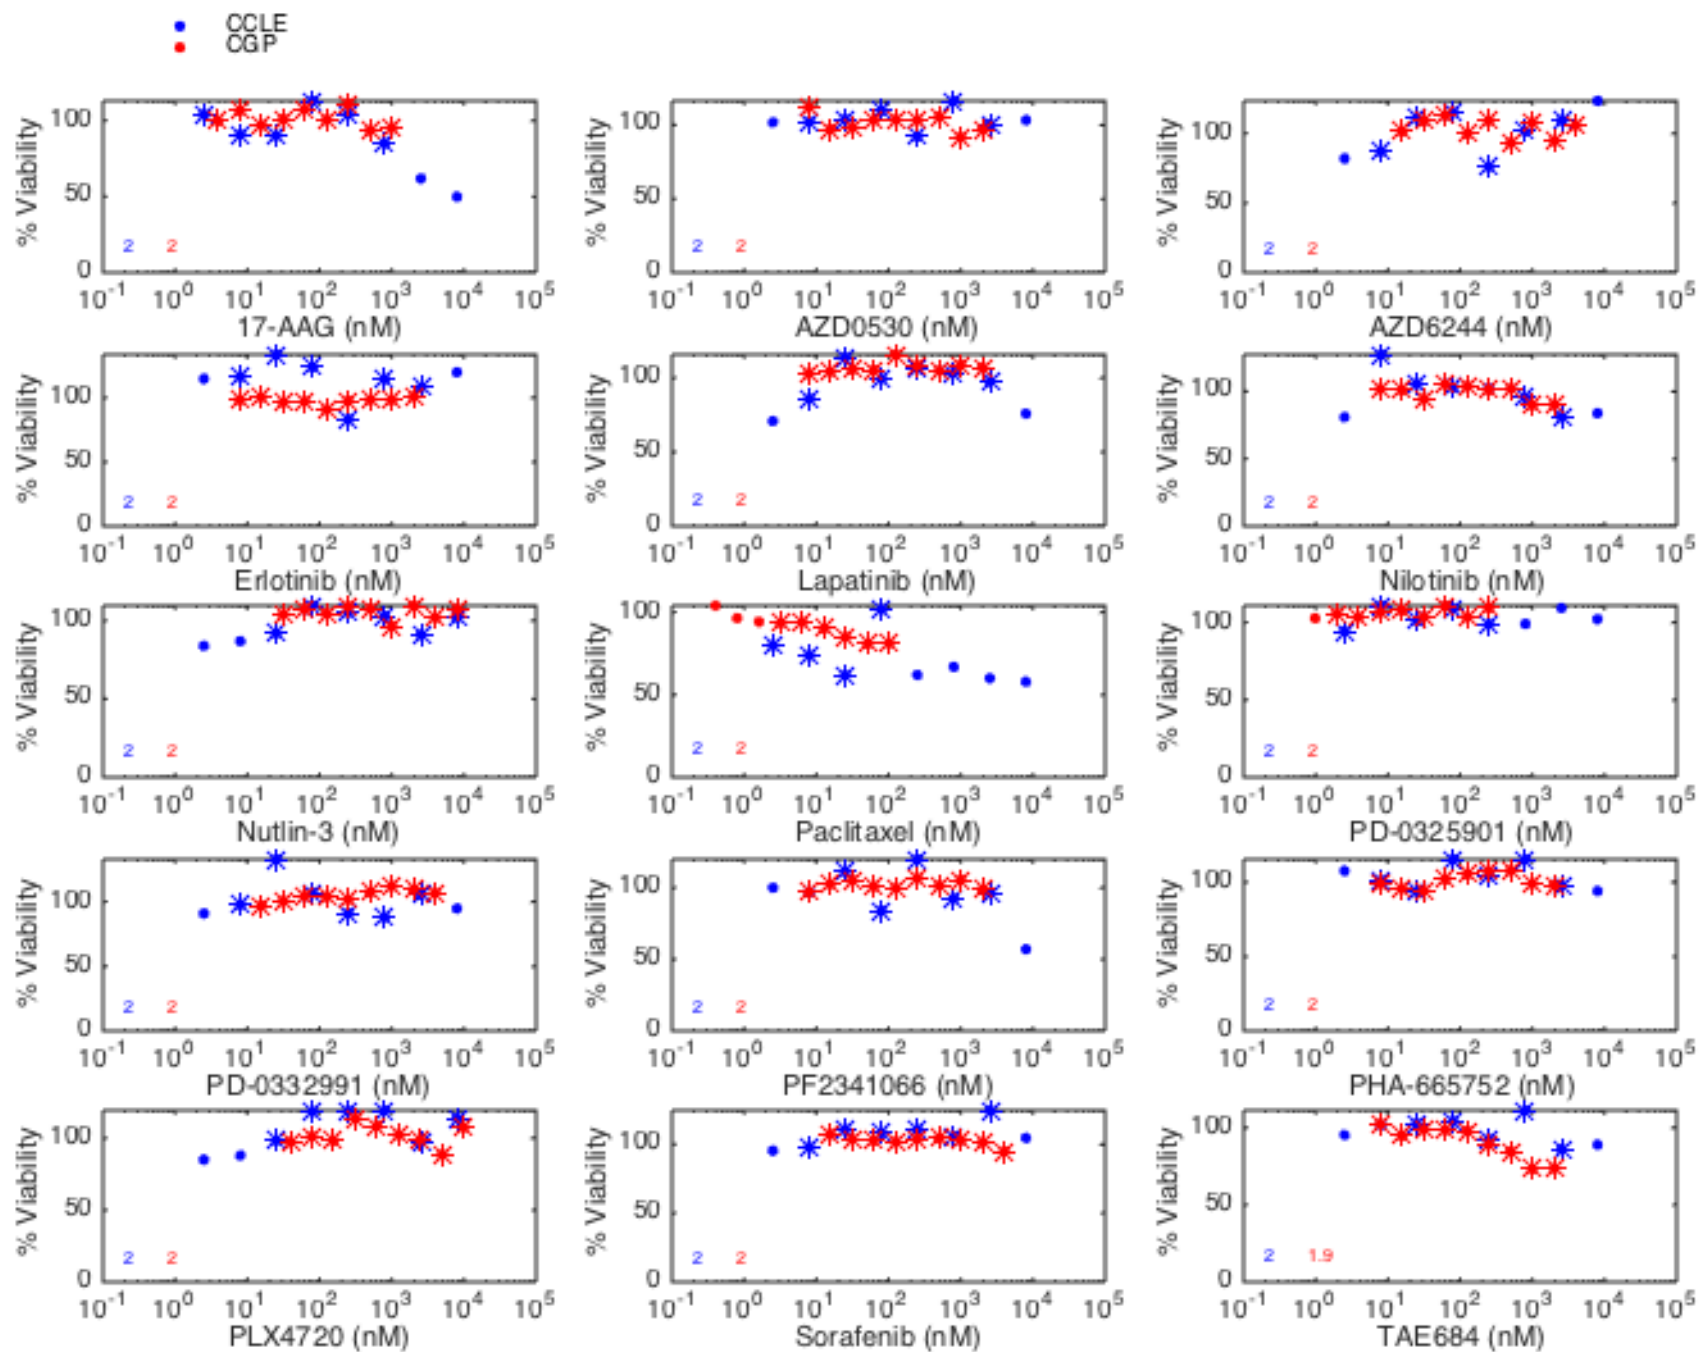

# NCI-H1155

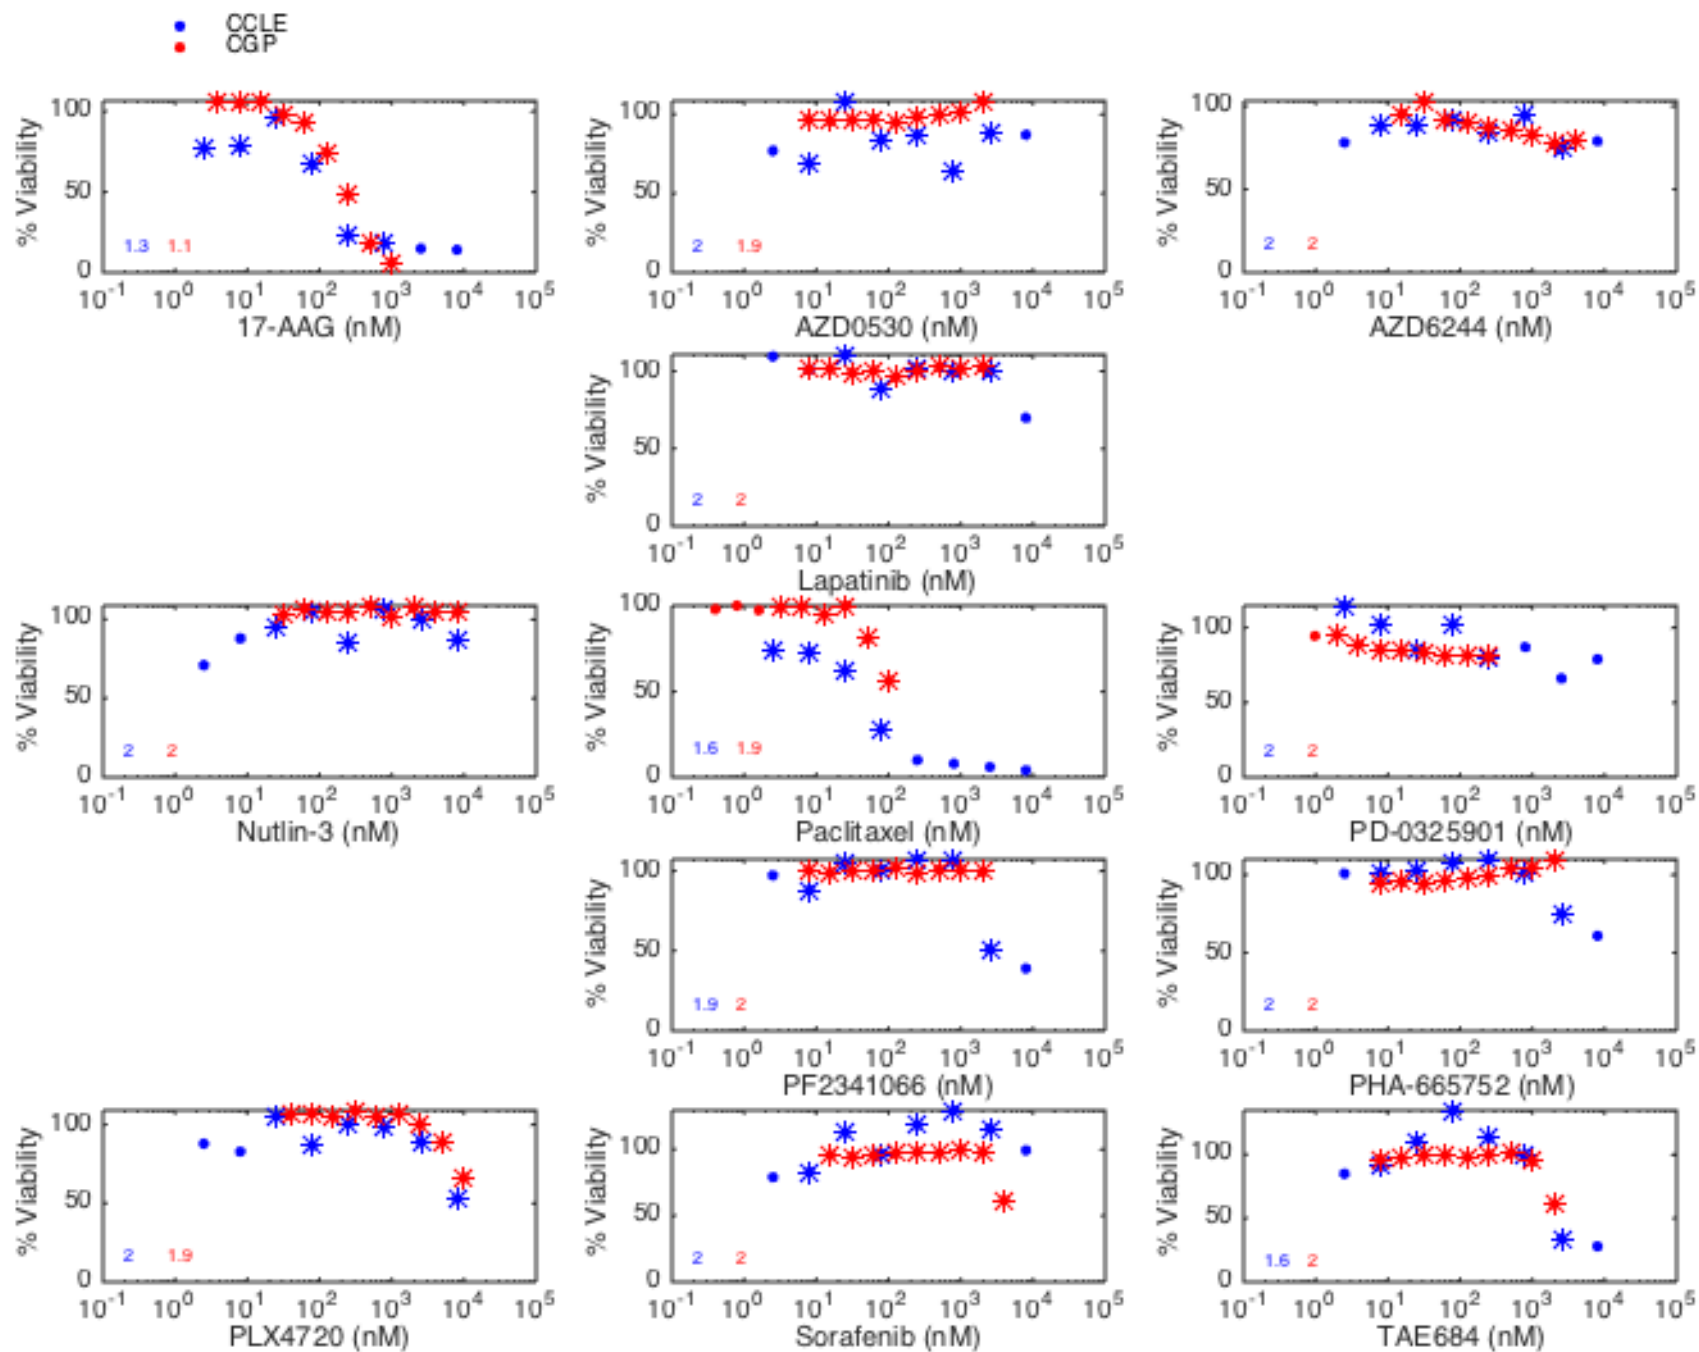



# NCI-H1299

● CCLE  
● CGP

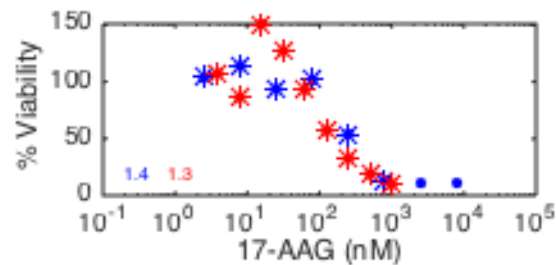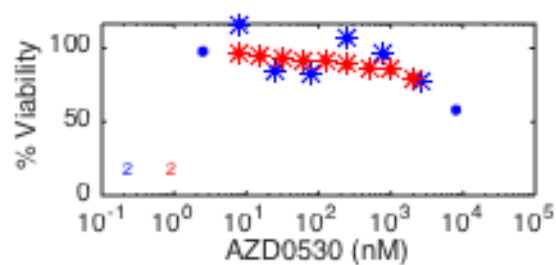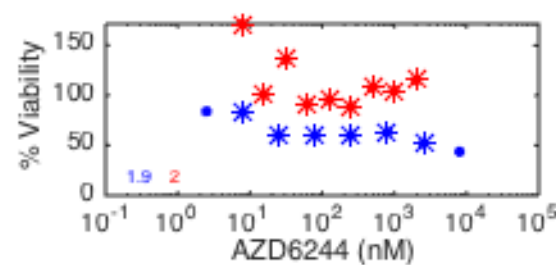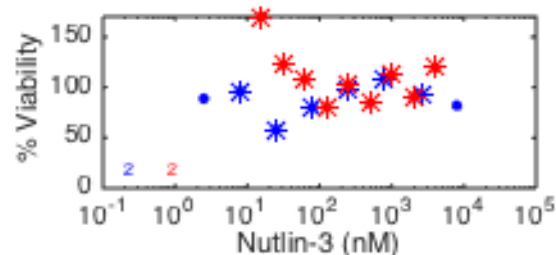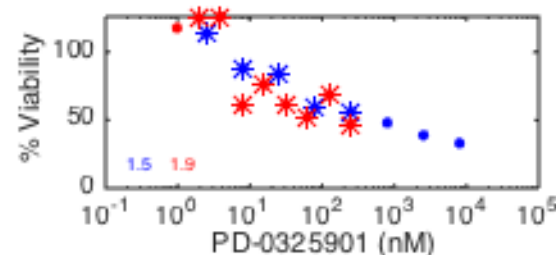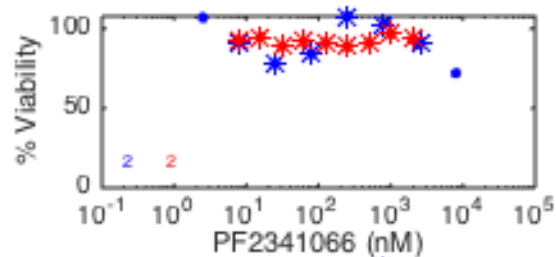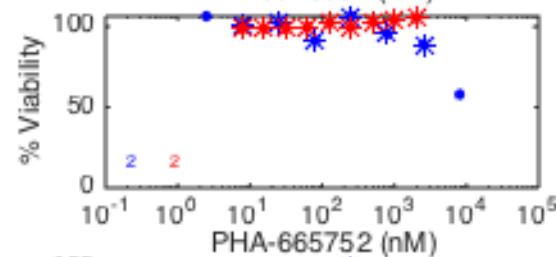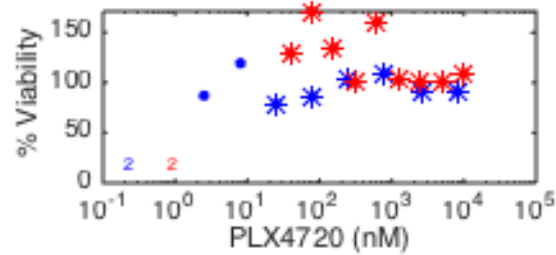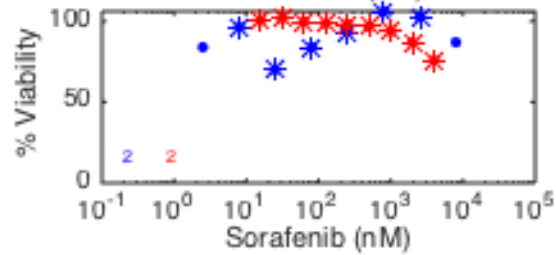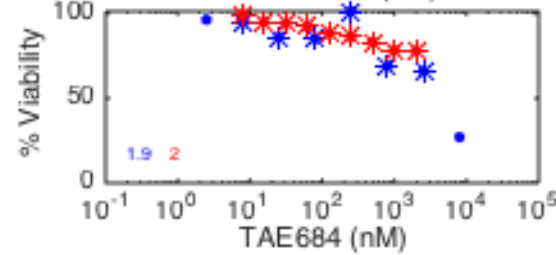

# NCI-H1355

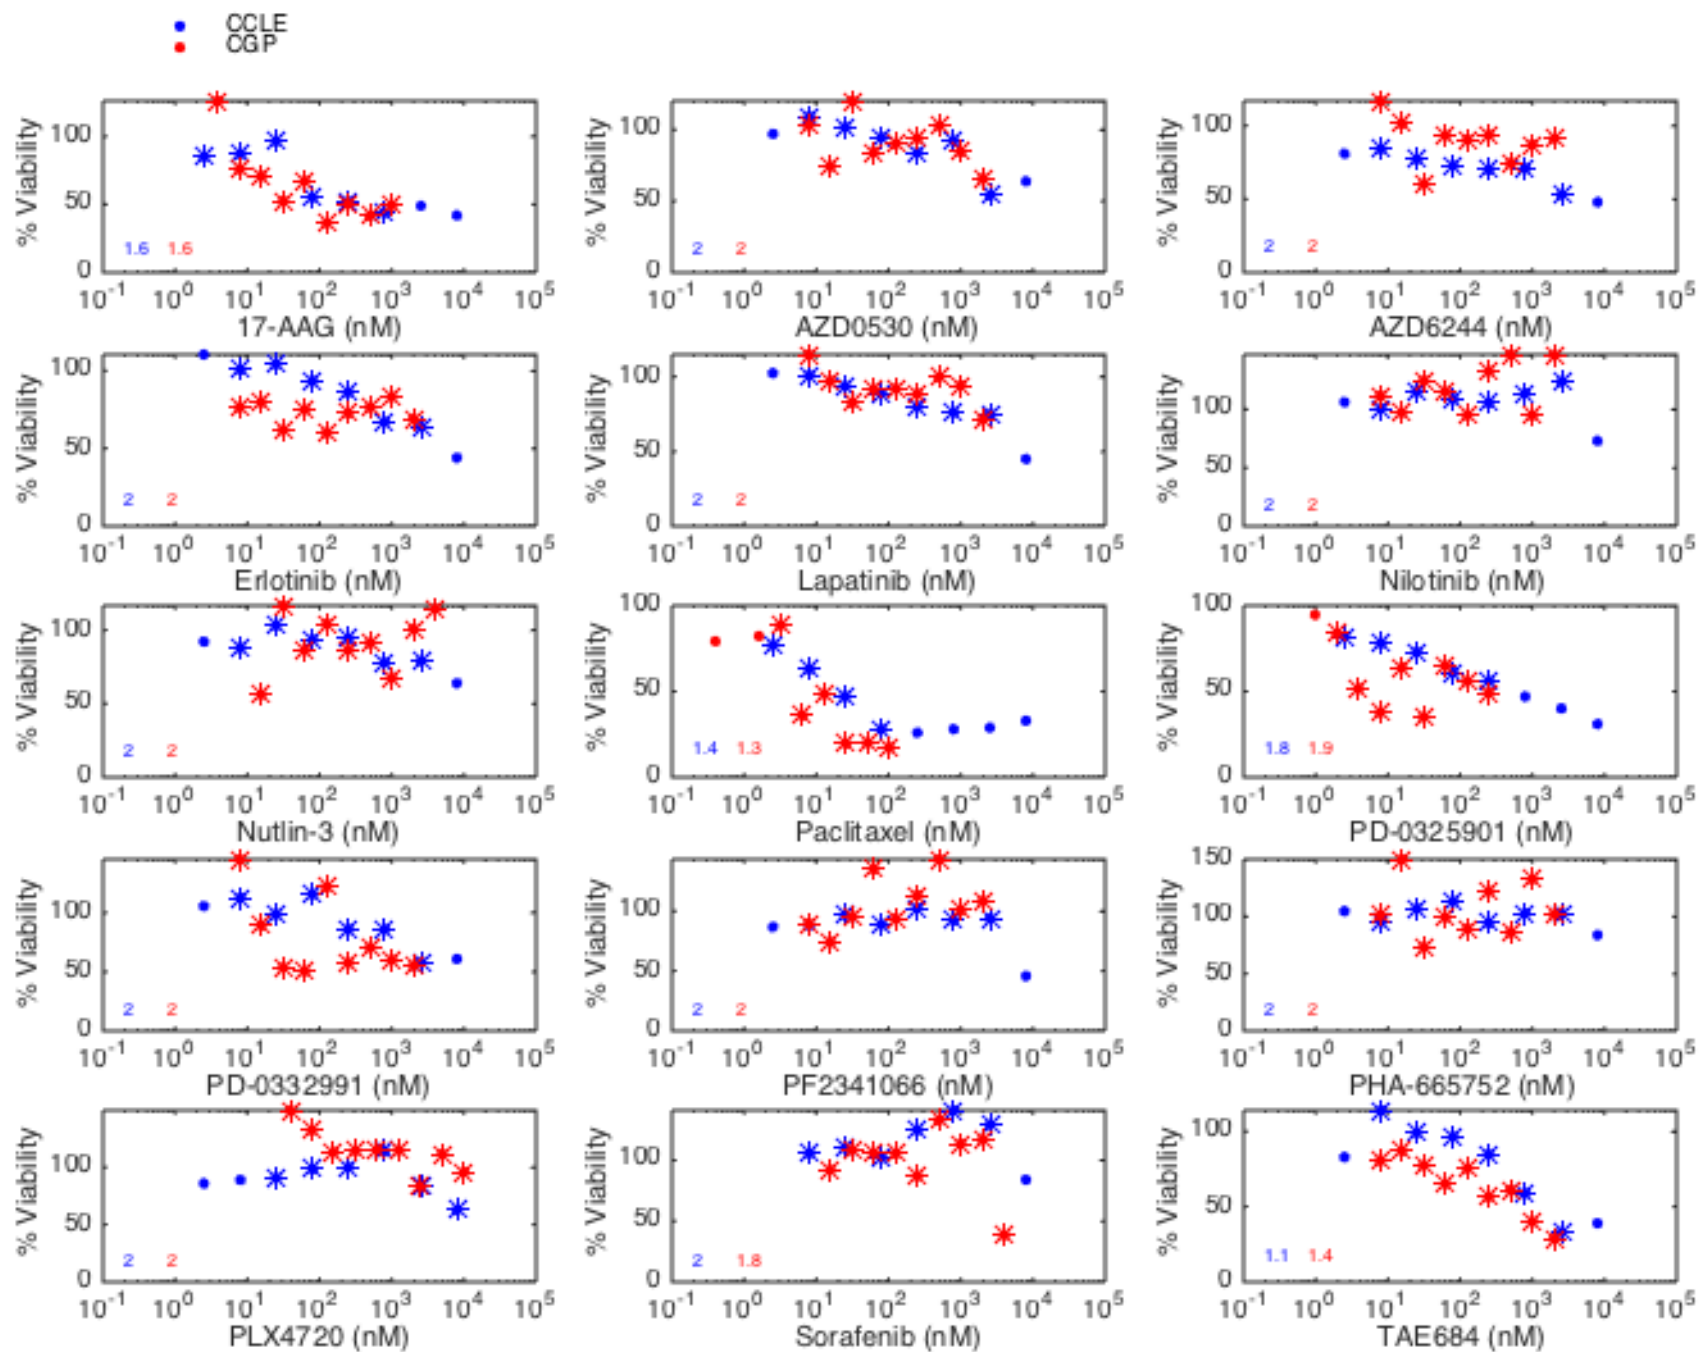

NCI-H1563

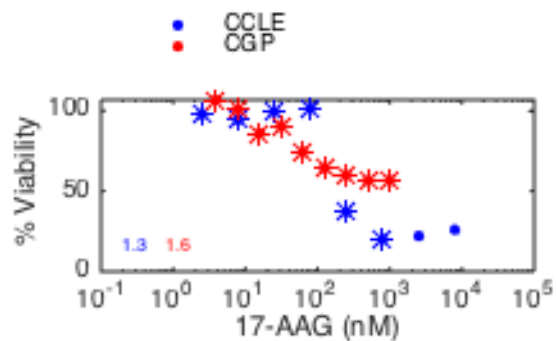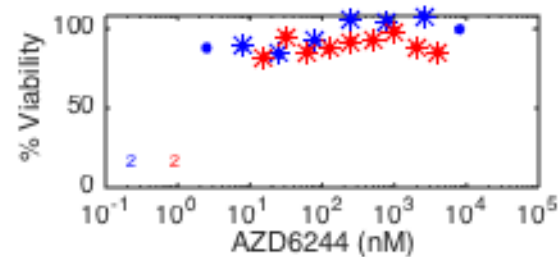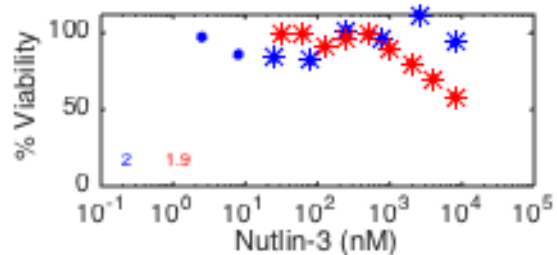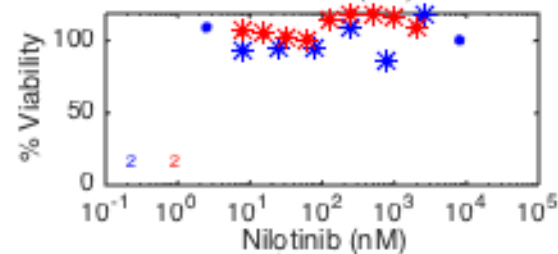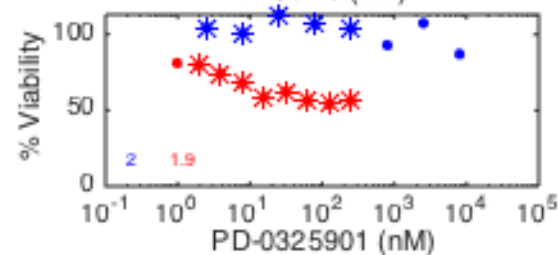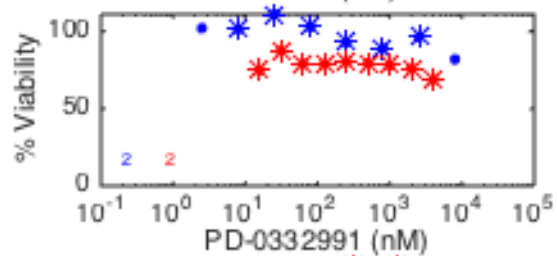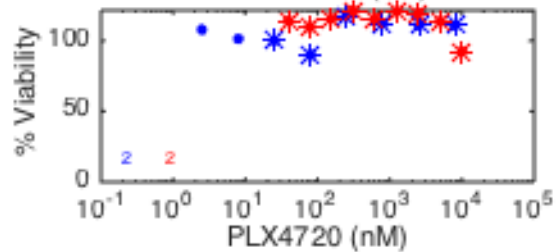

NCI-H1573

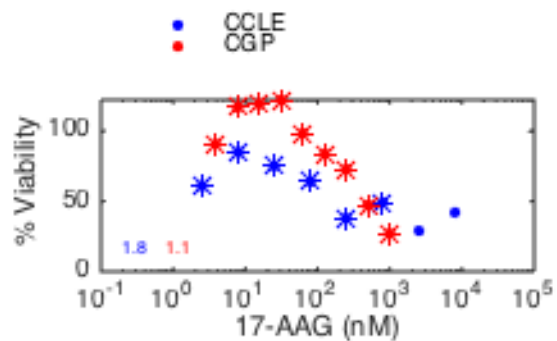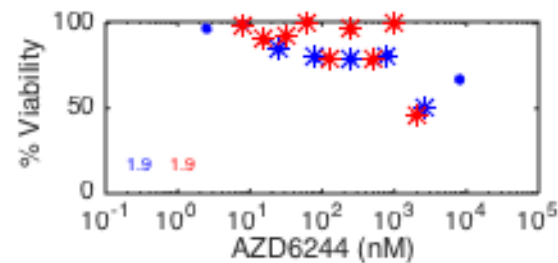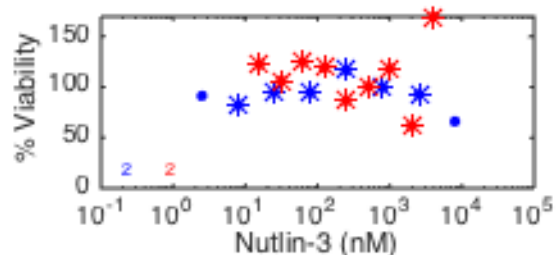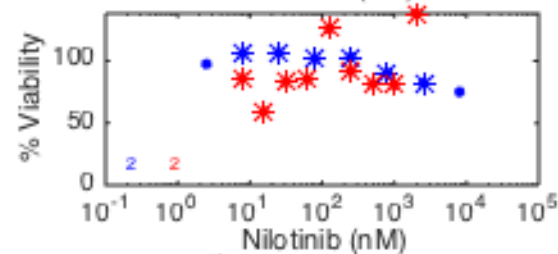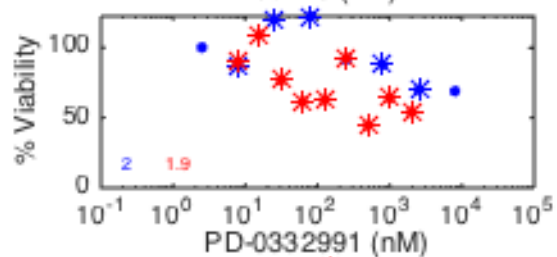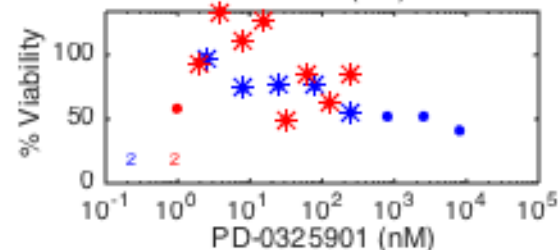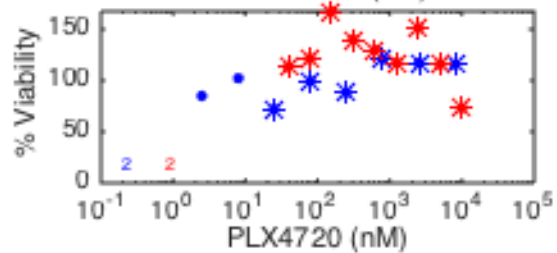

# NCI-H1581

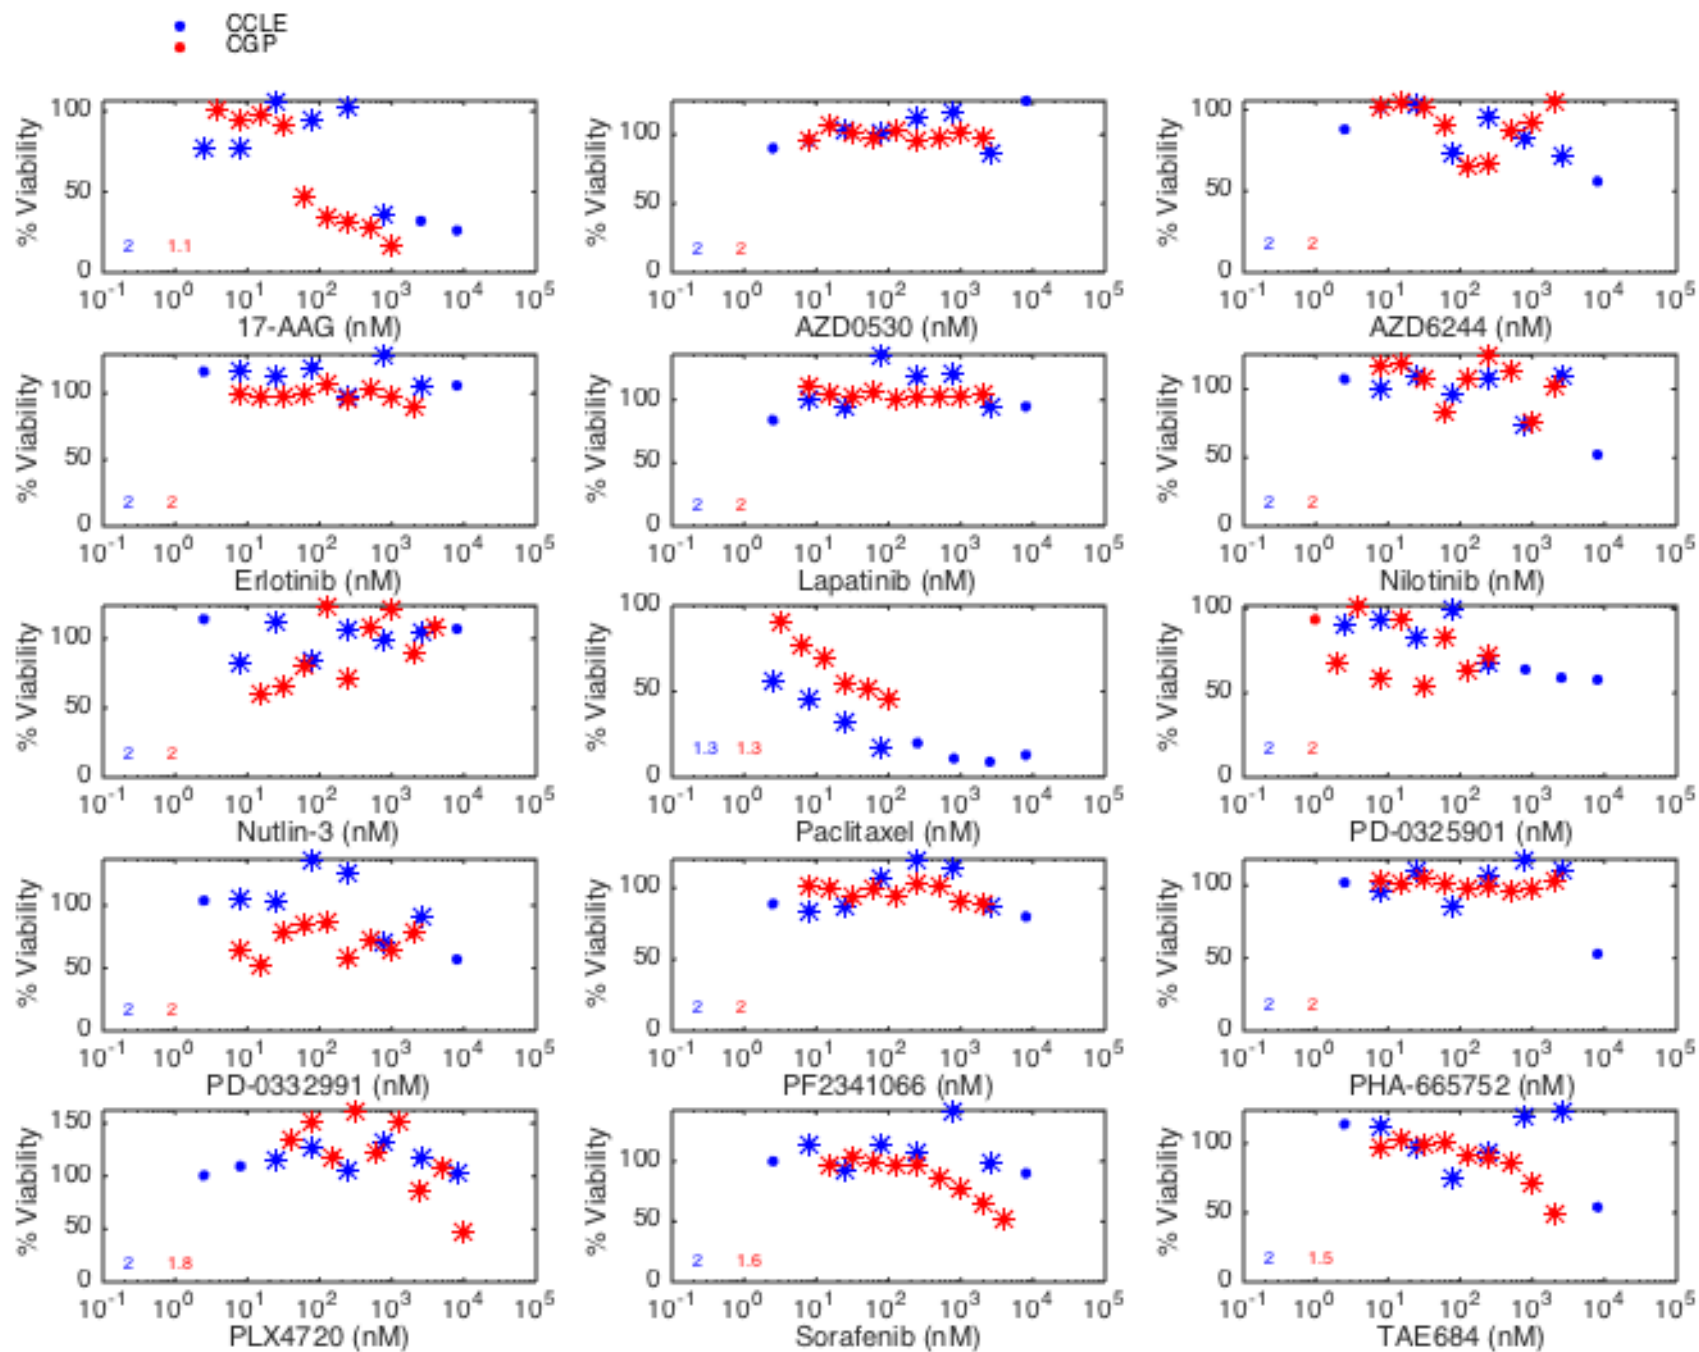

# NCI-H1648

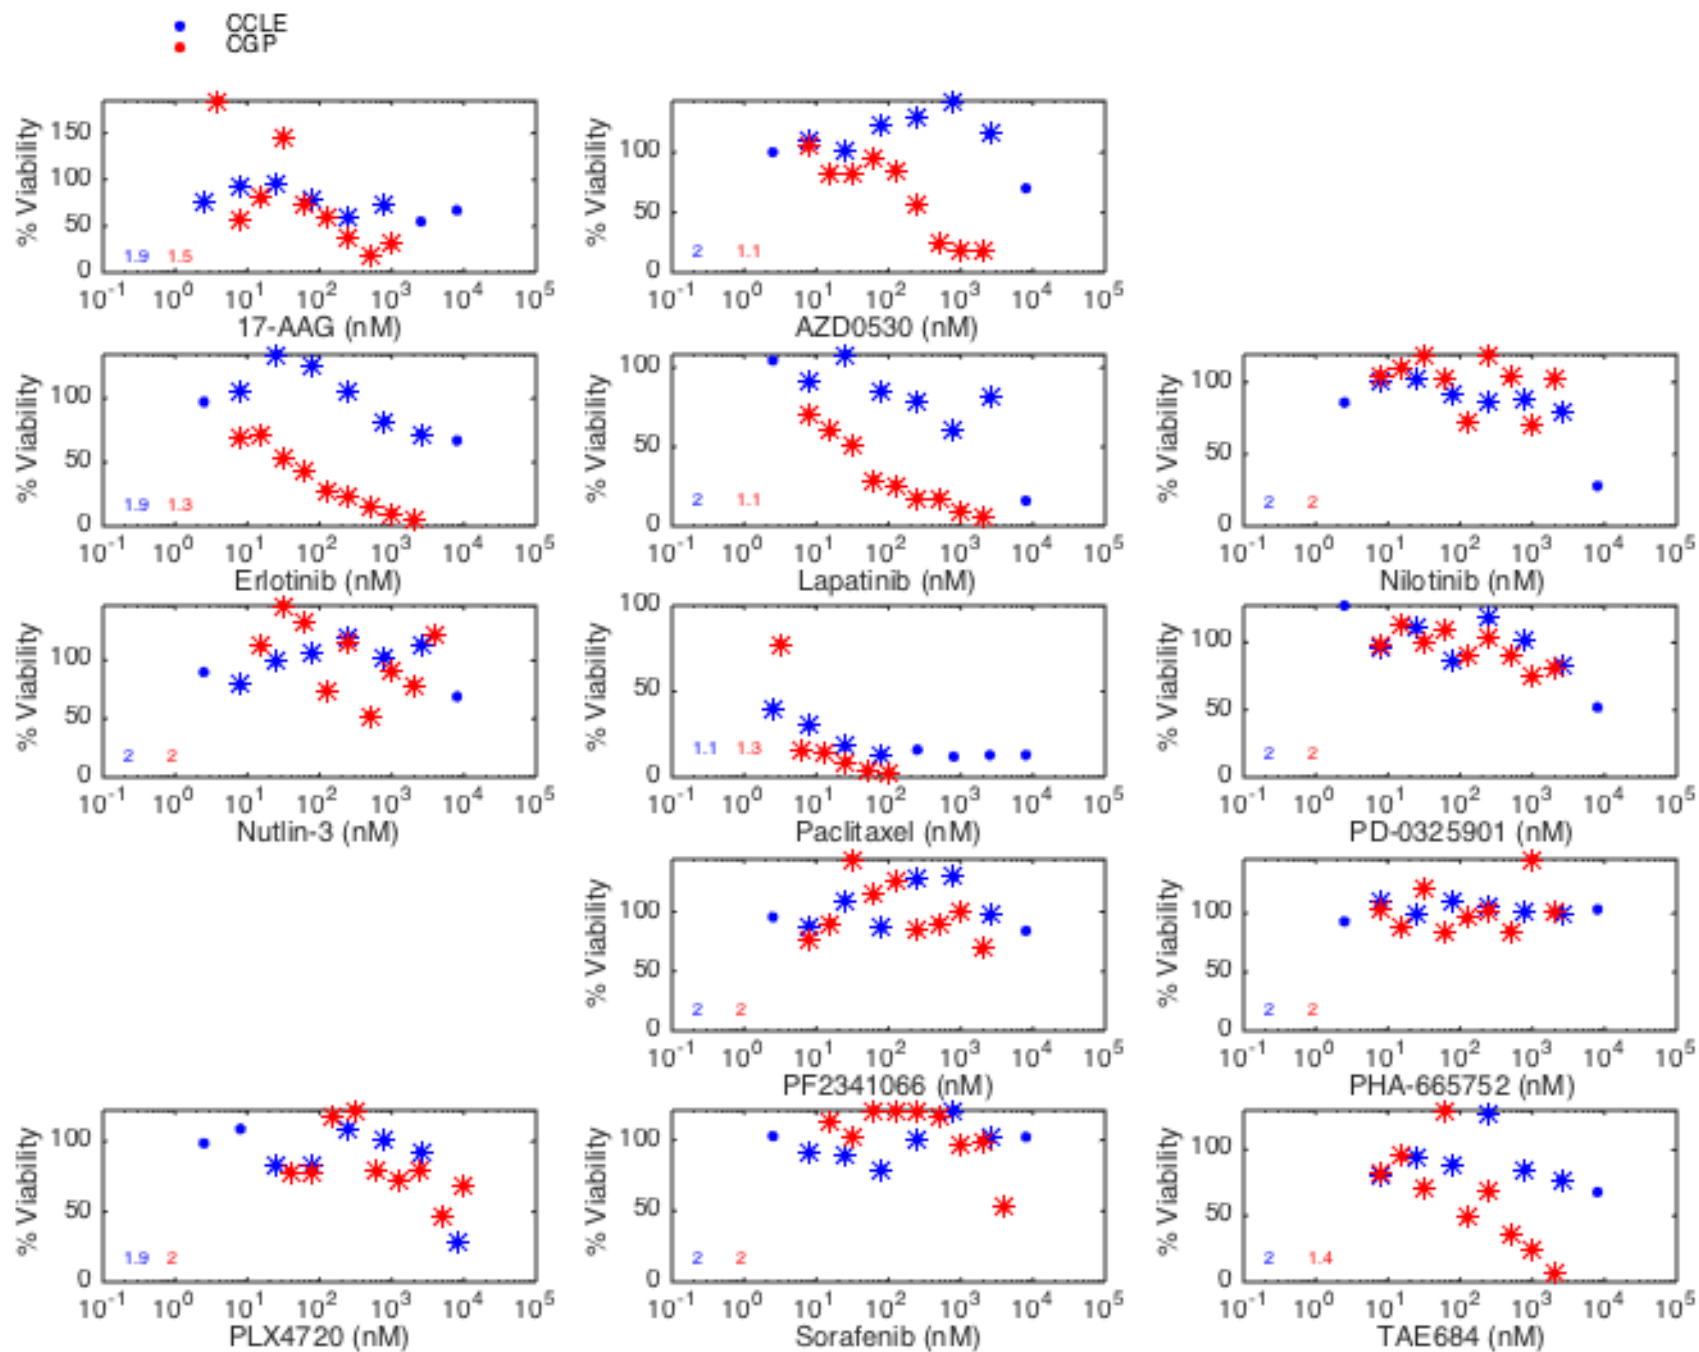

NCI-H1650

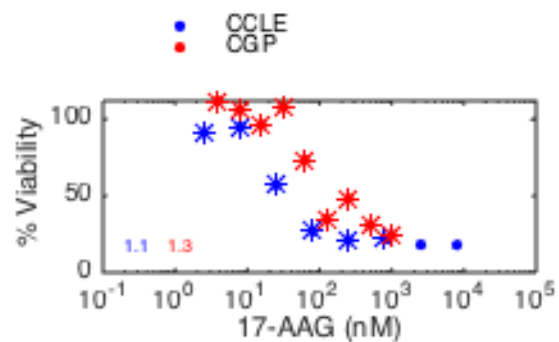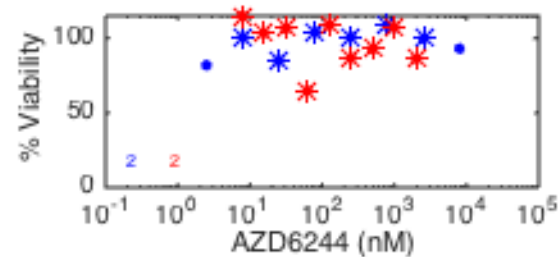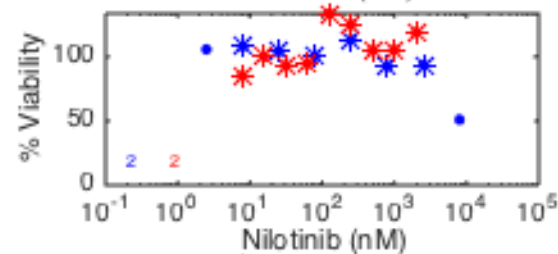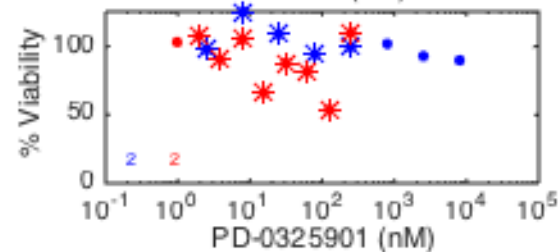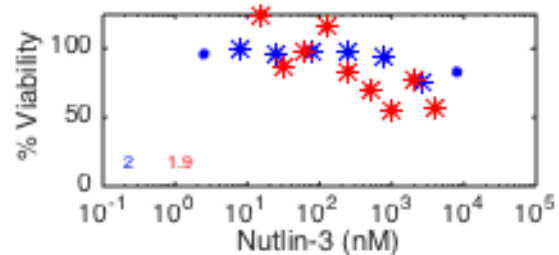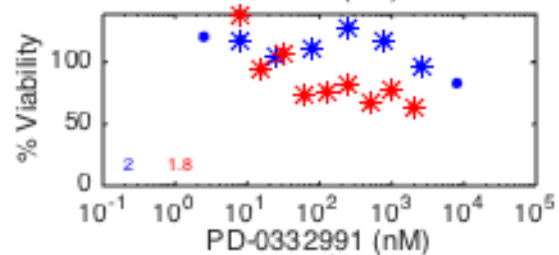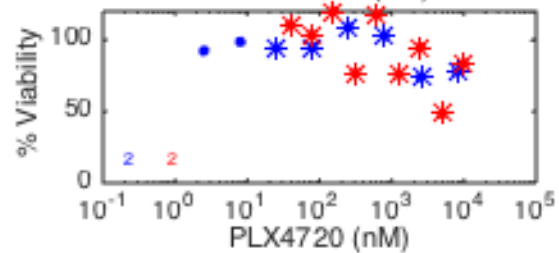

NCI-H1651

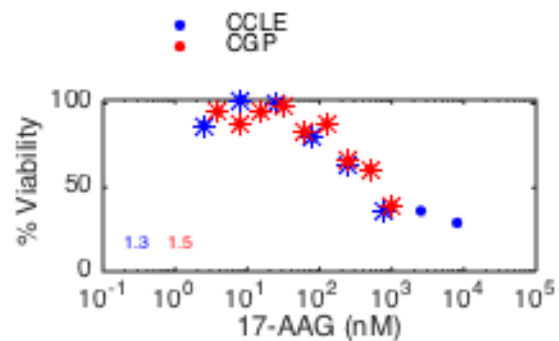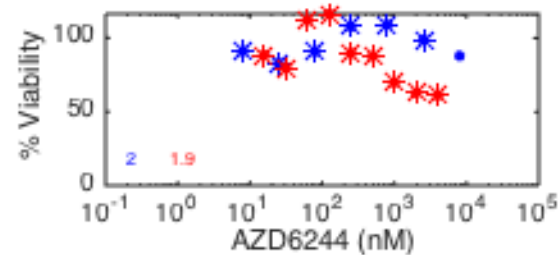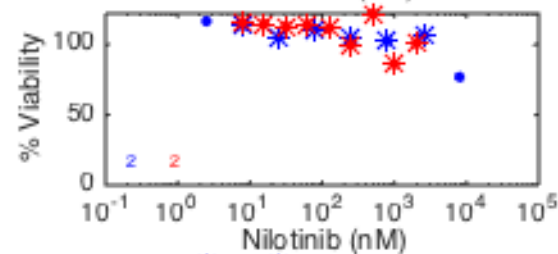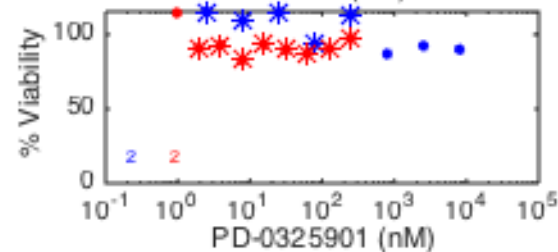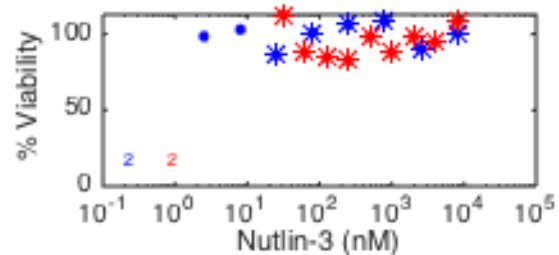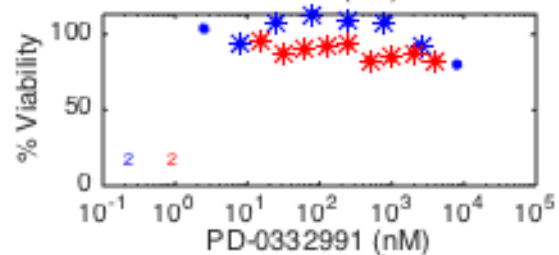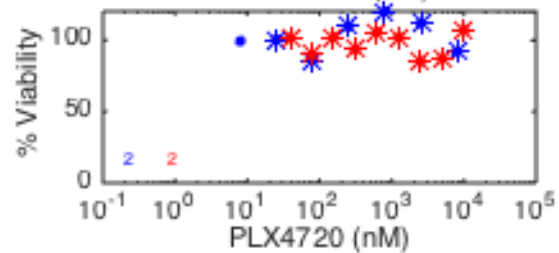



# NCI-H1666

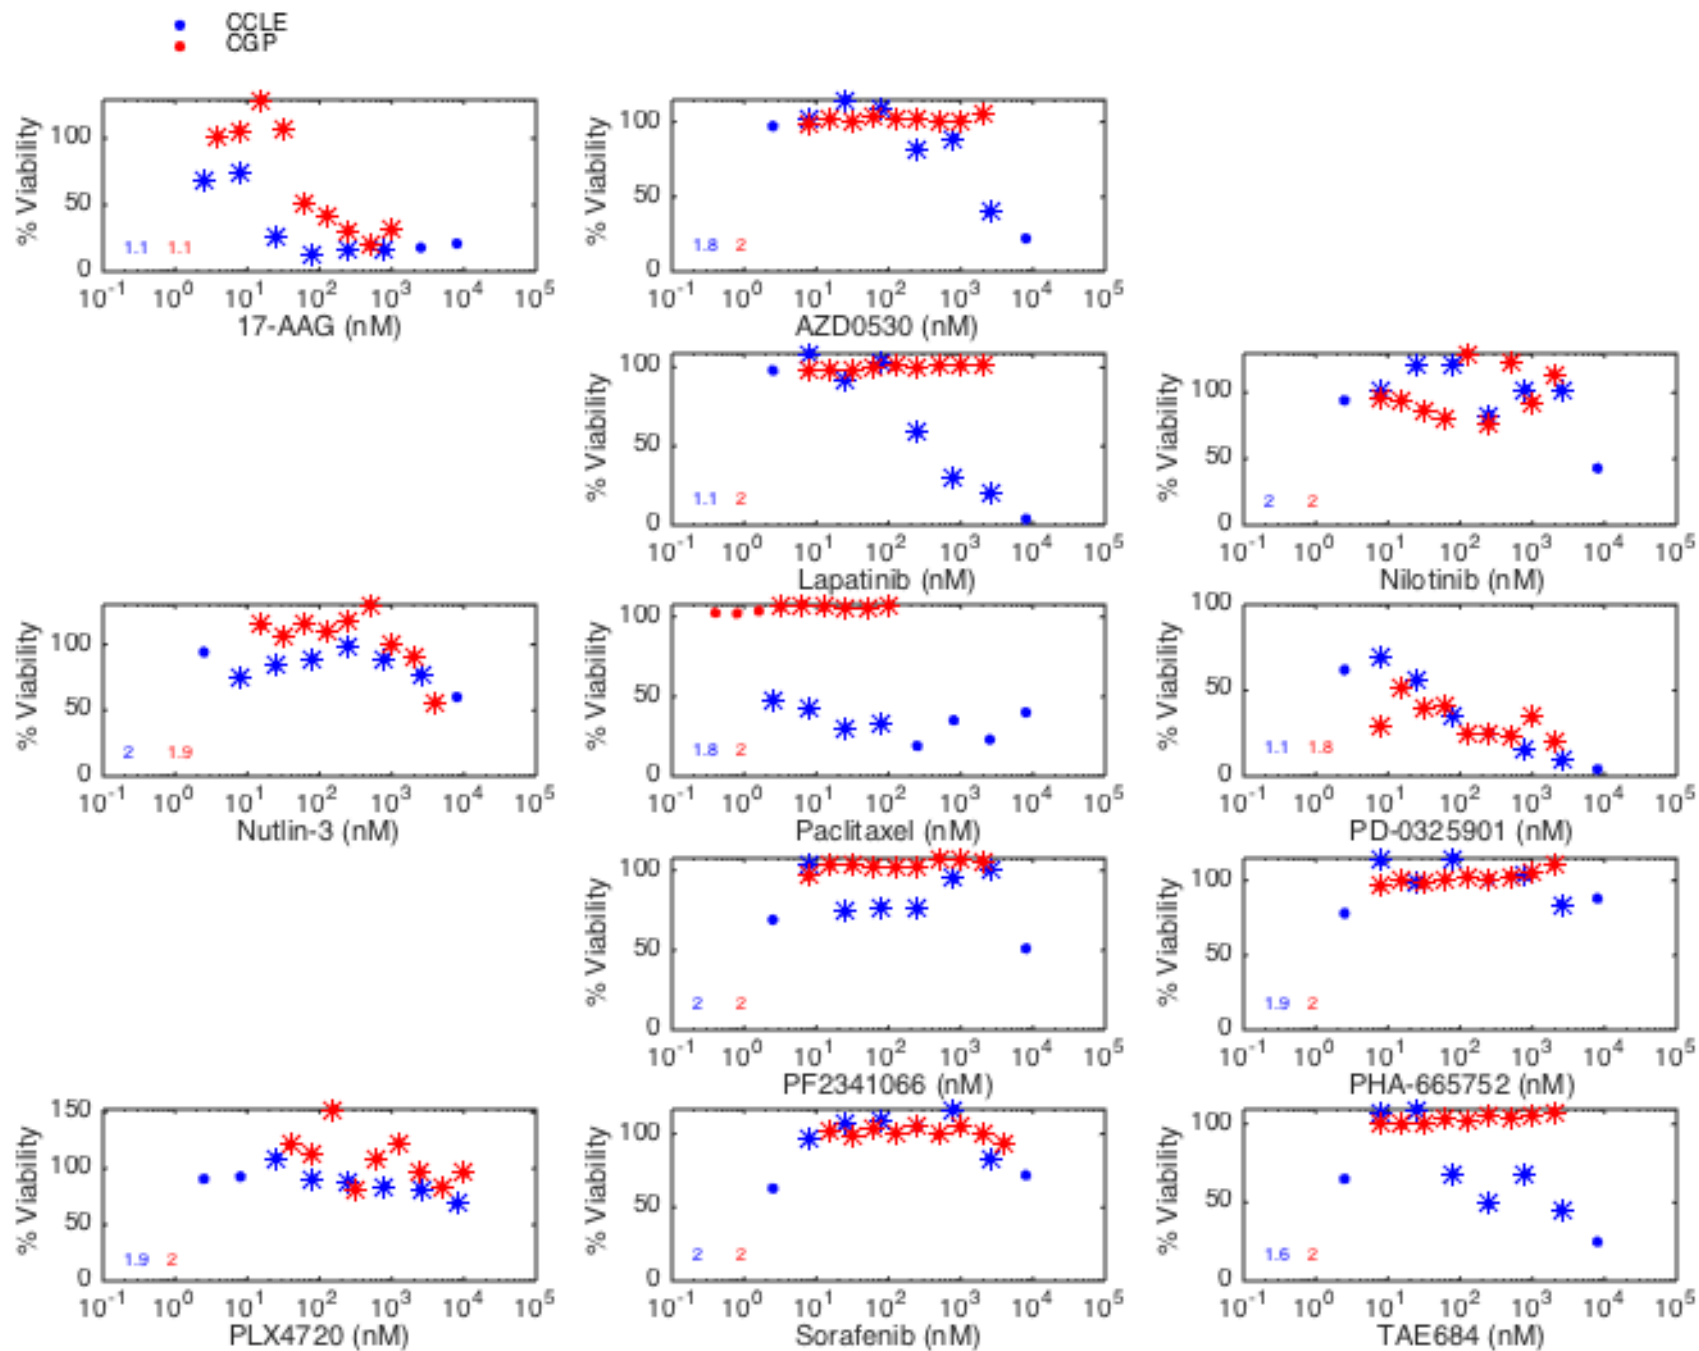

NCI-H1693

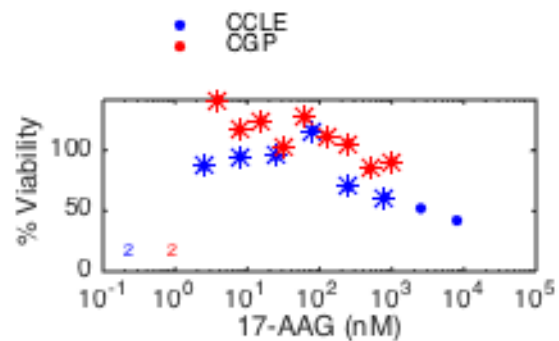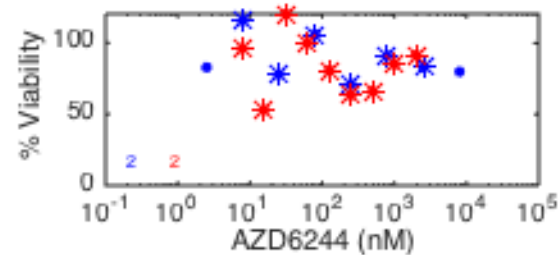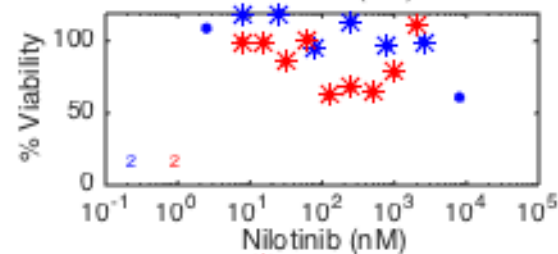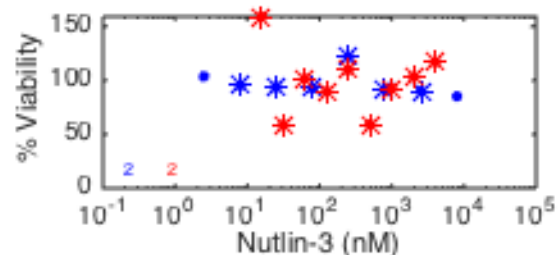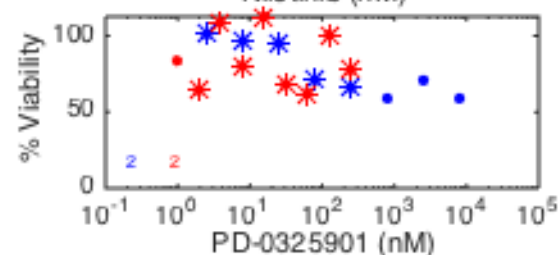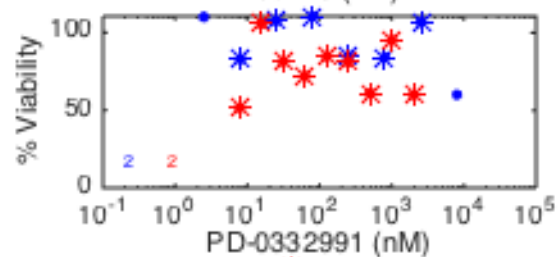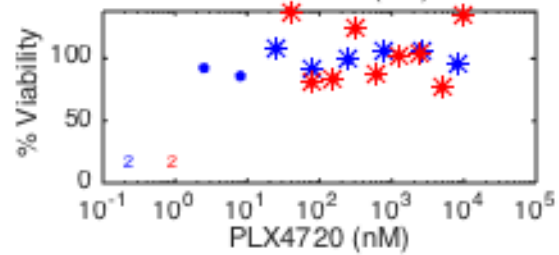

# NCI-H1694

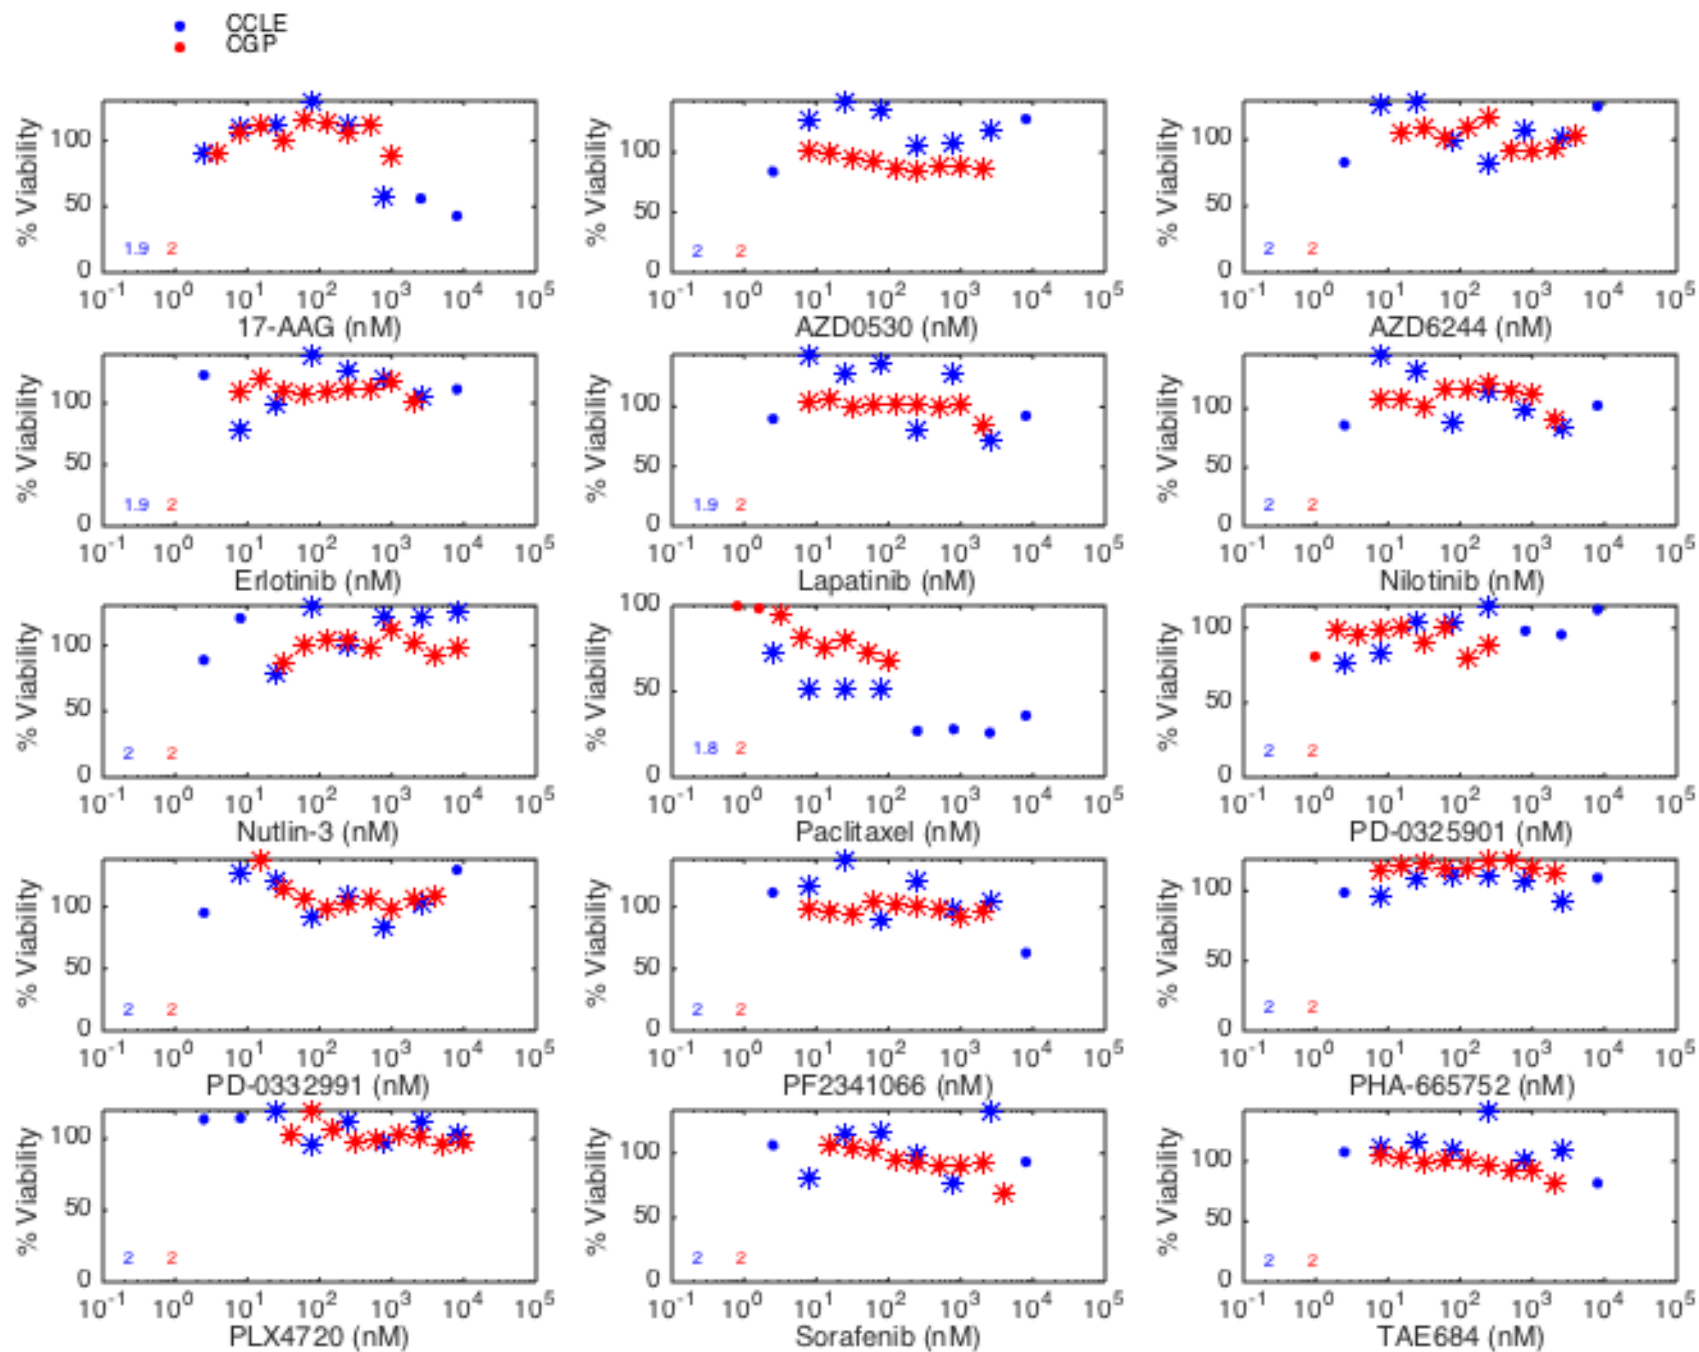

NCI-H1703

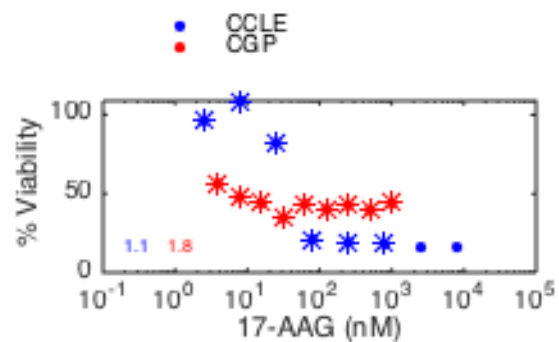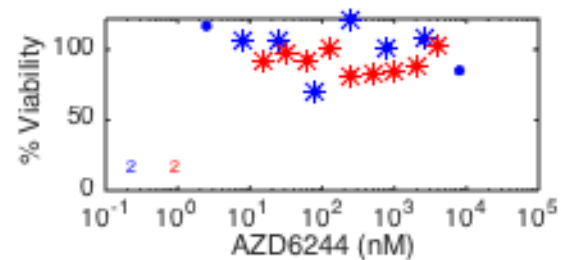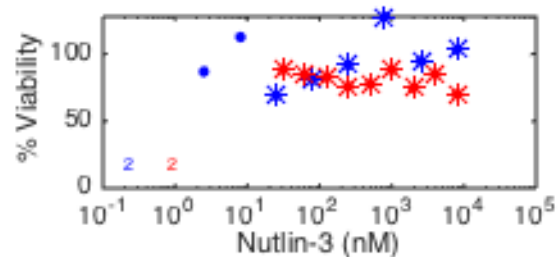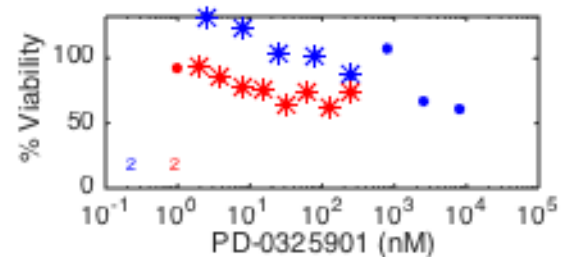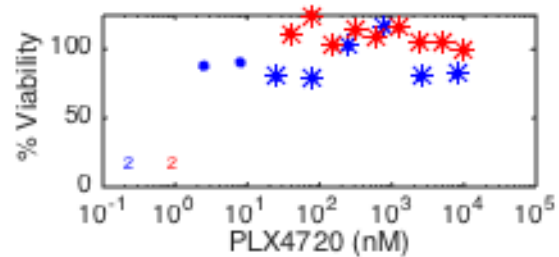

NCI-H1792

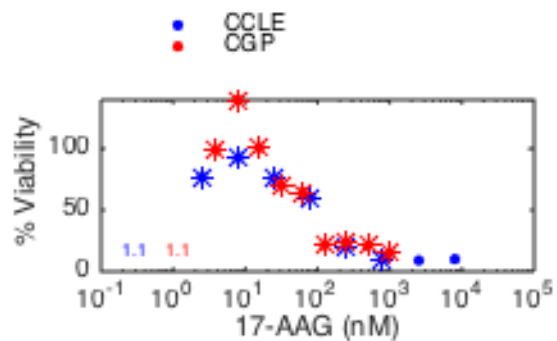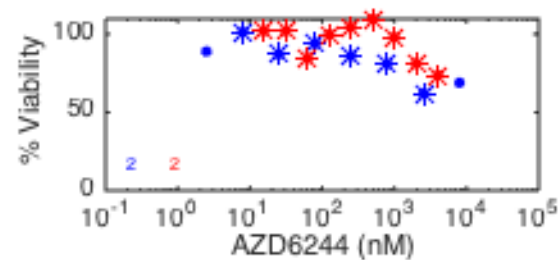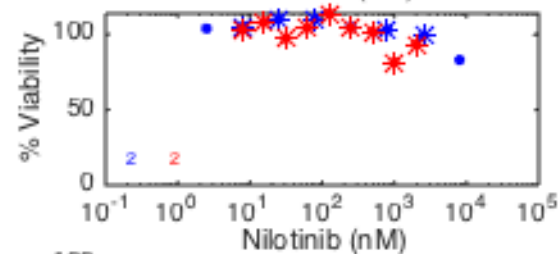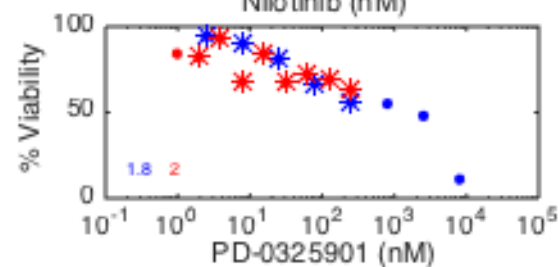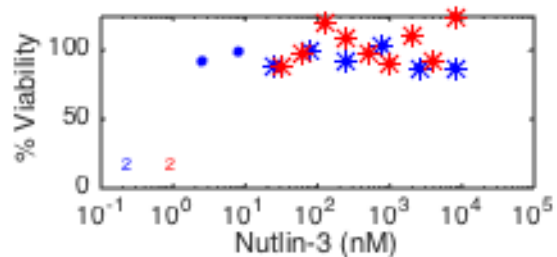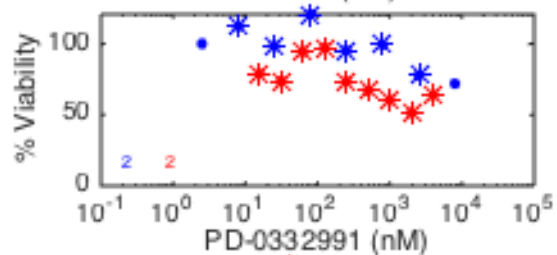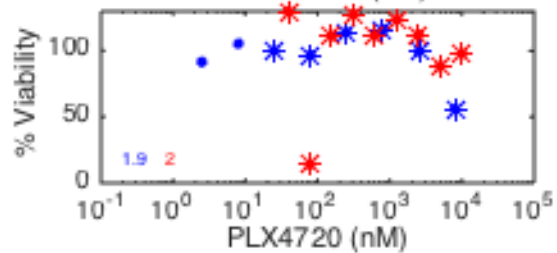

NCI-H1793

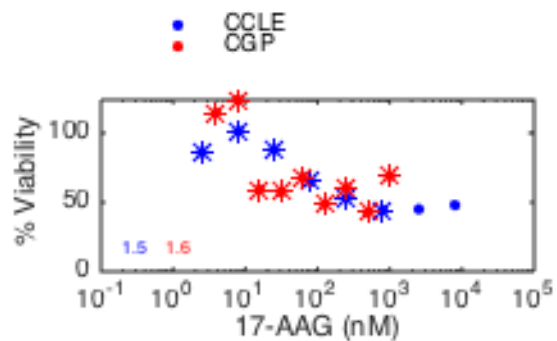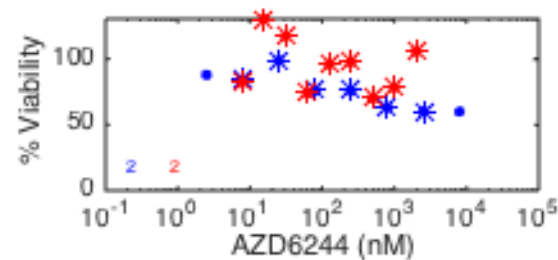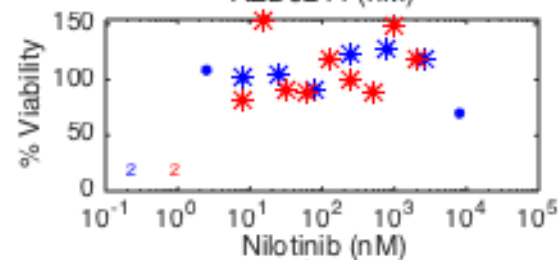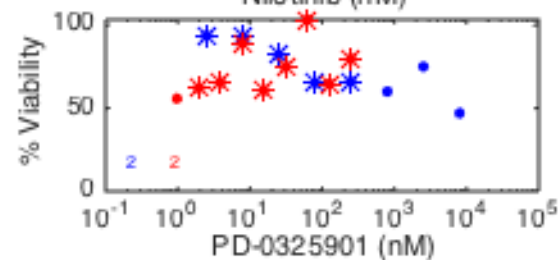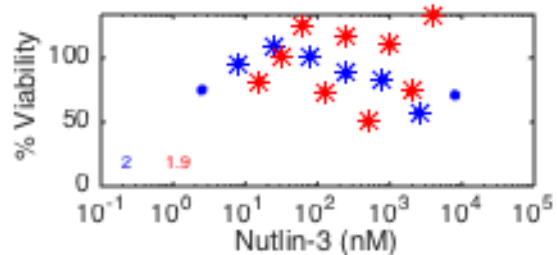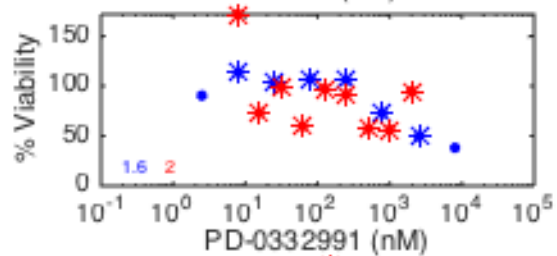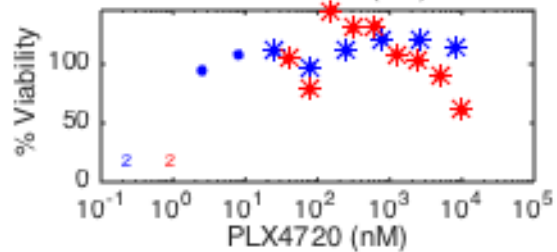

# NCI-H1975

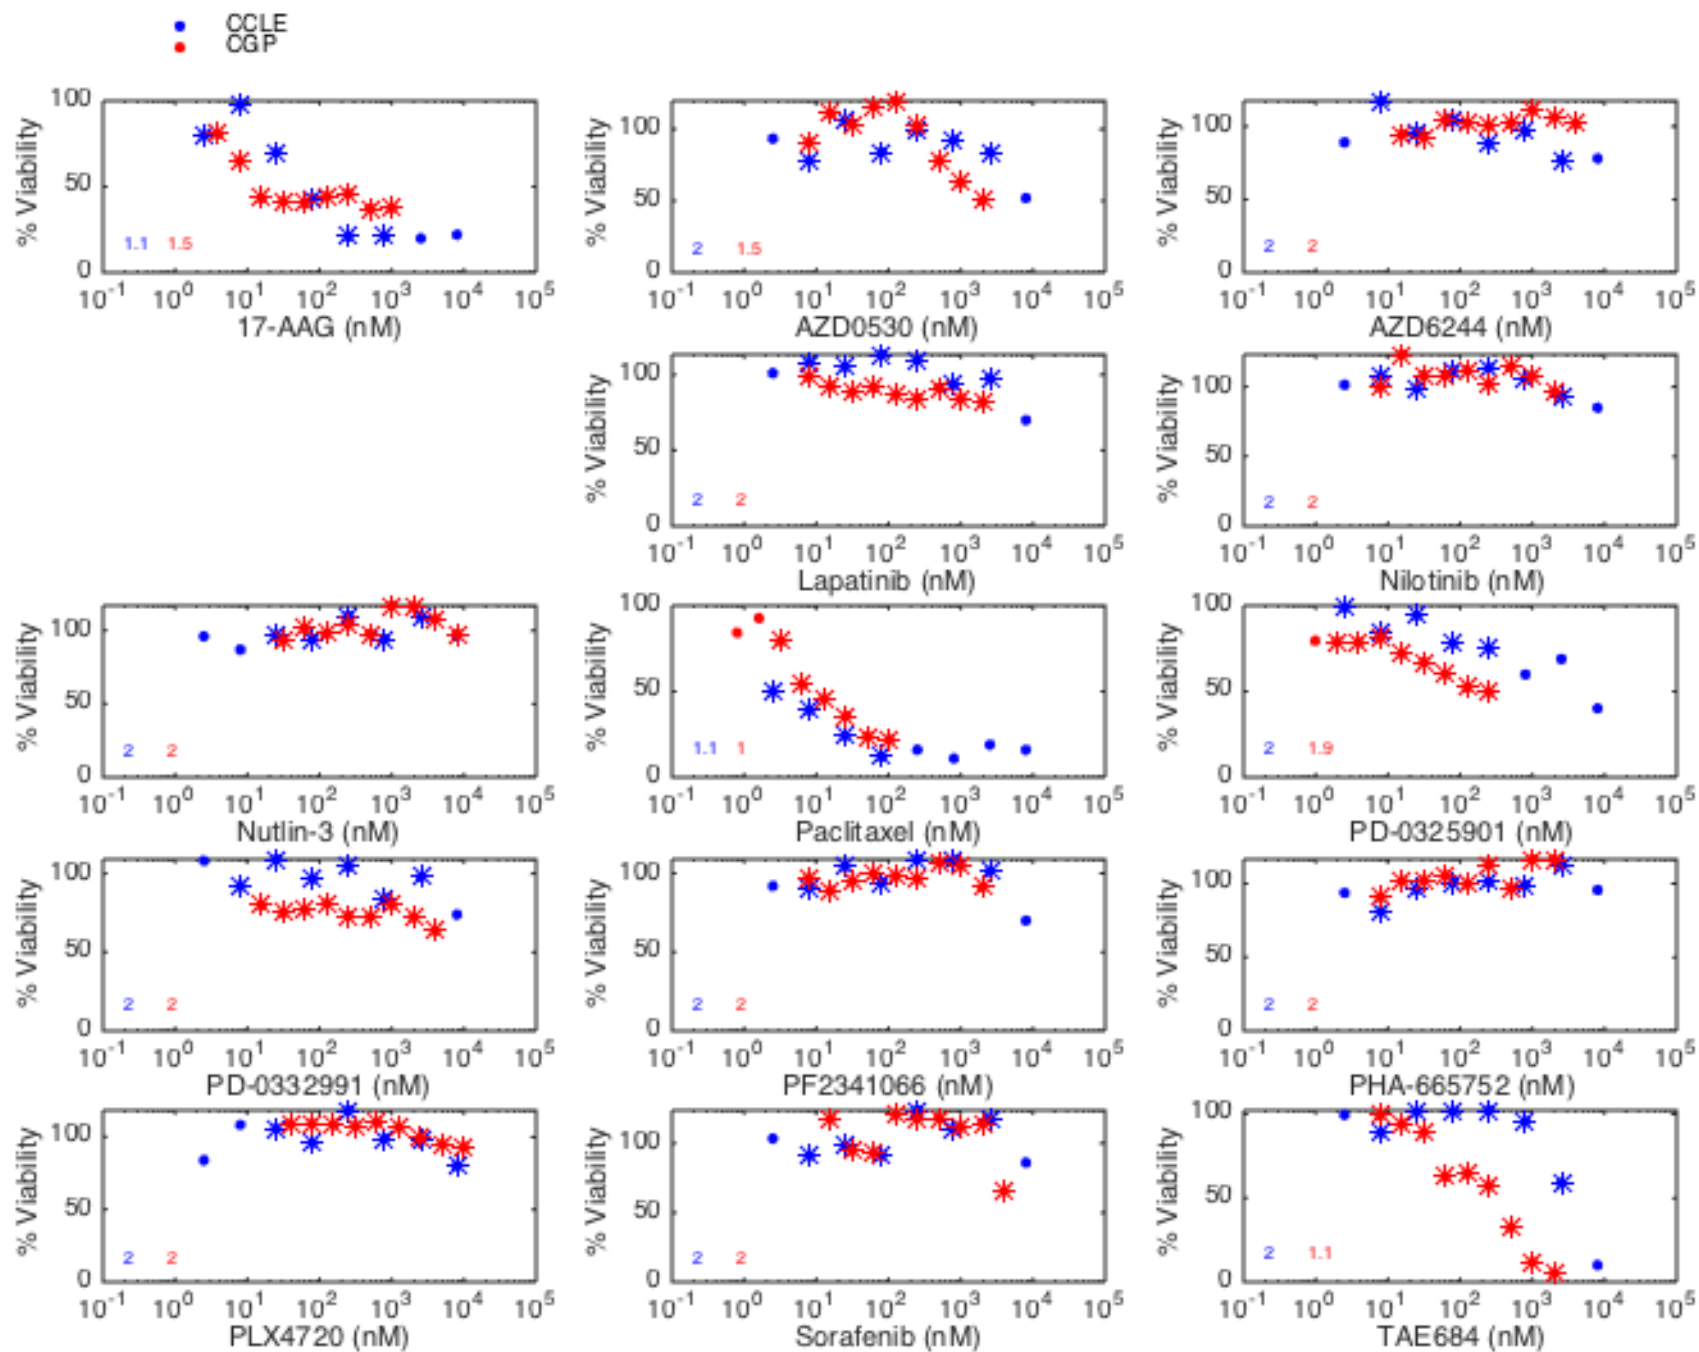

NCI-H2009

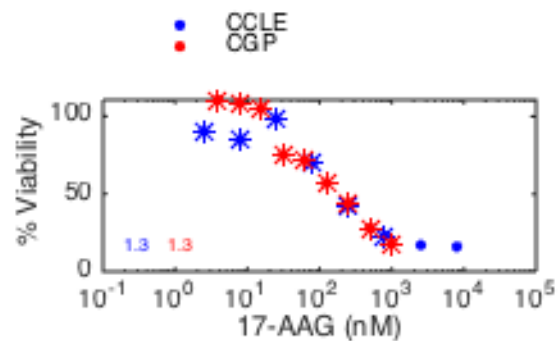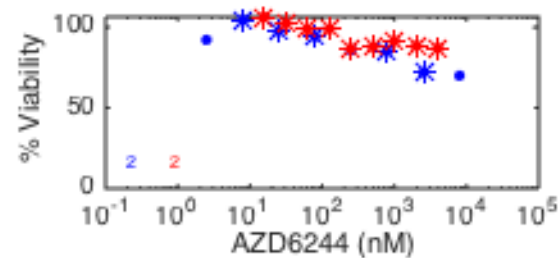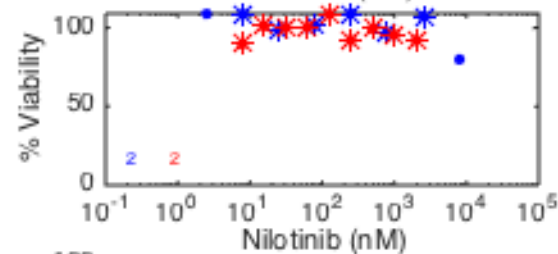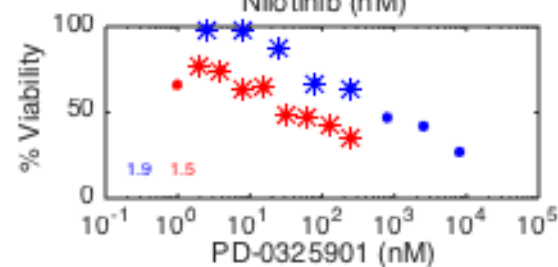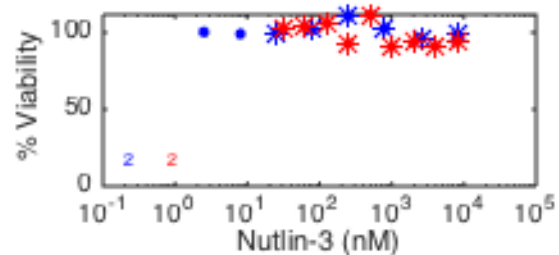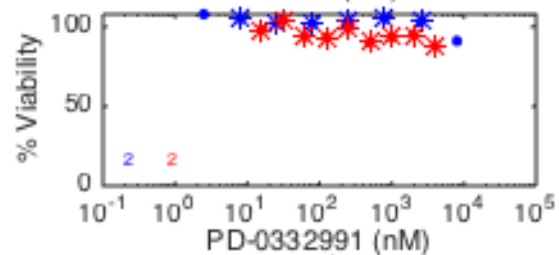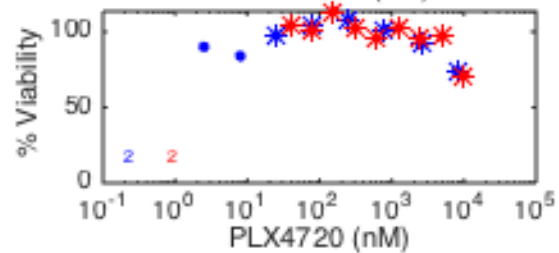



NCI-H2030

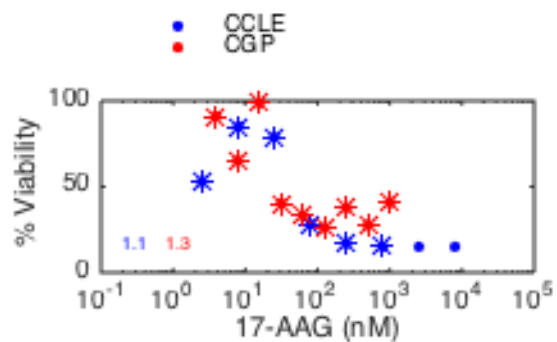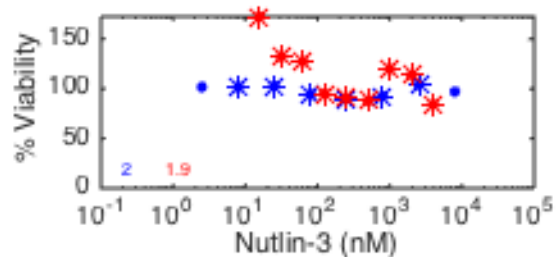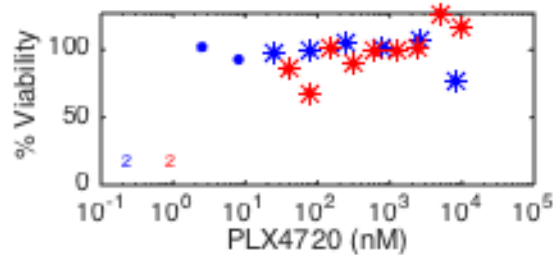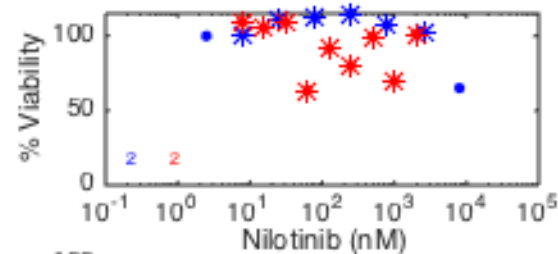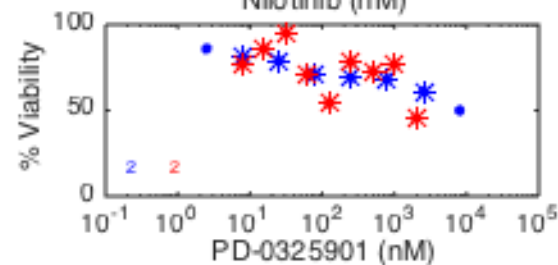

NCI-H2052

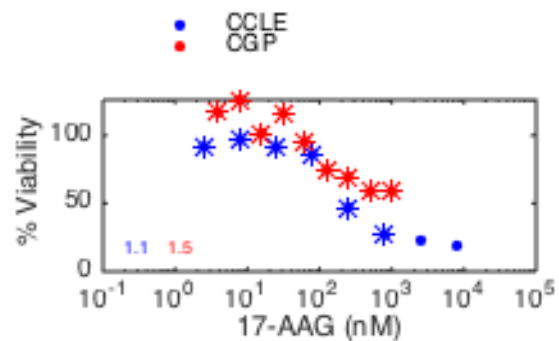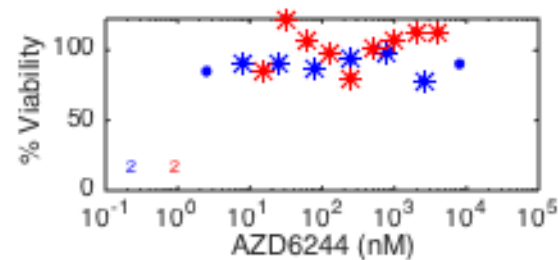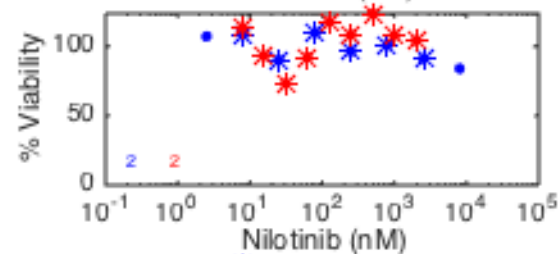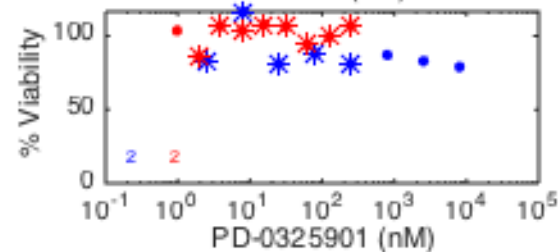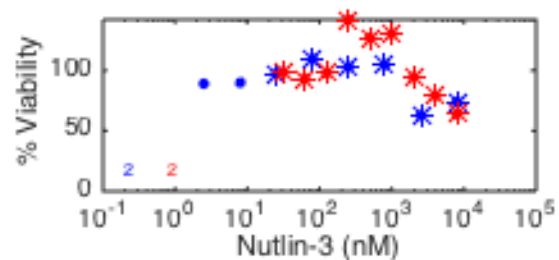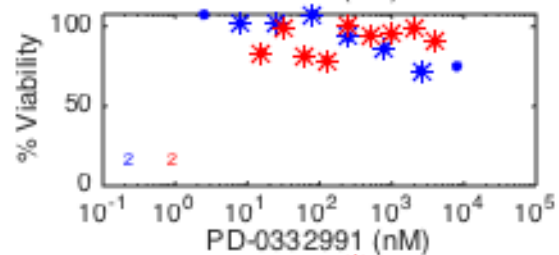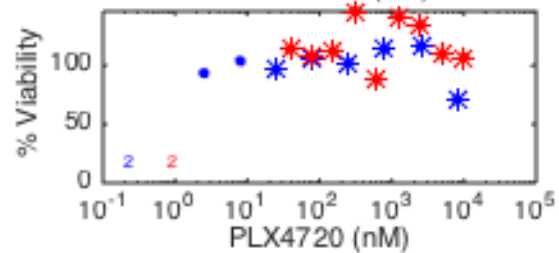

NCI-H2087

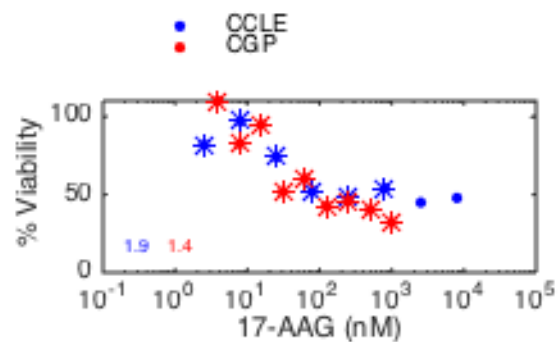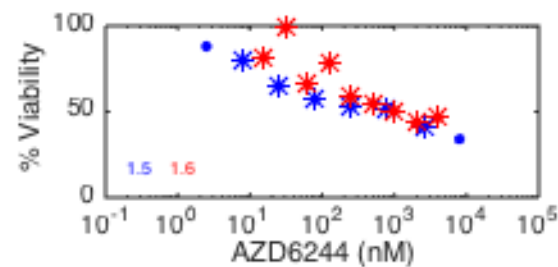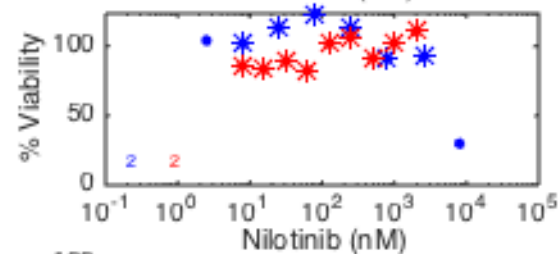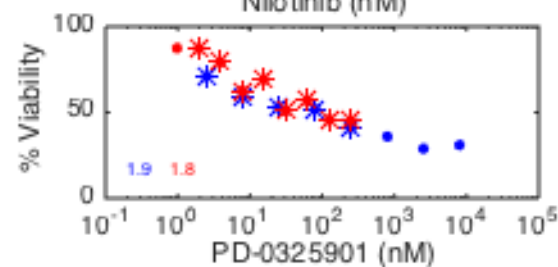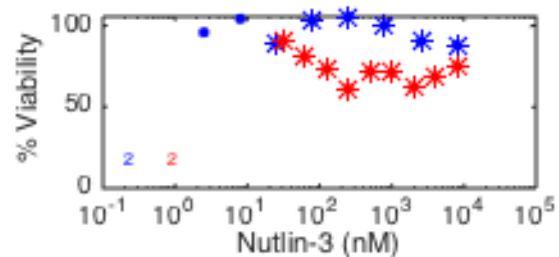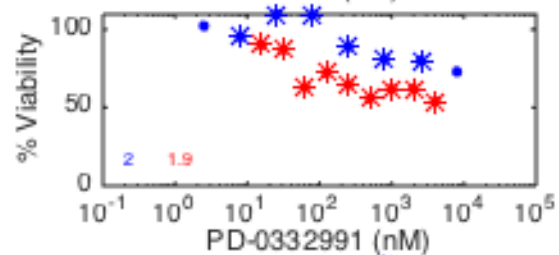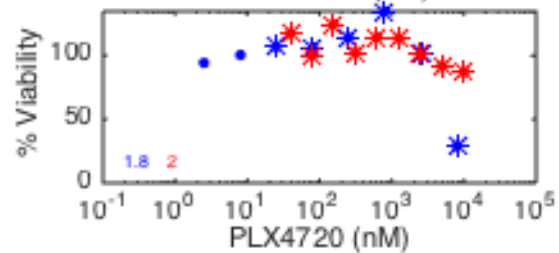

NCI-H2122

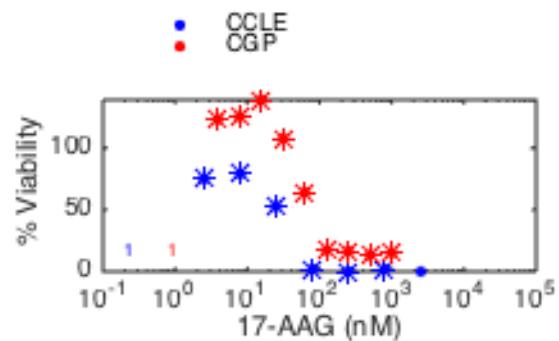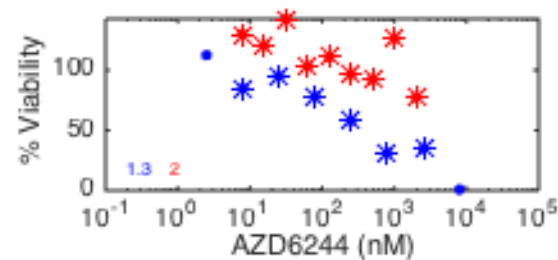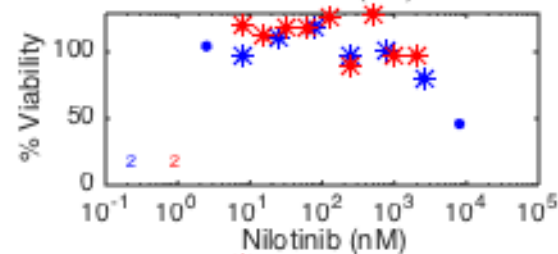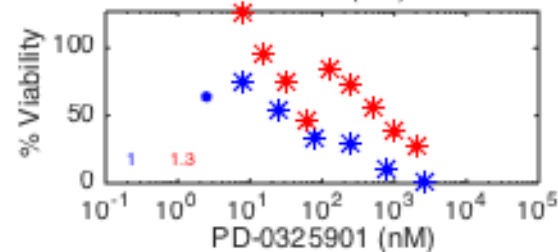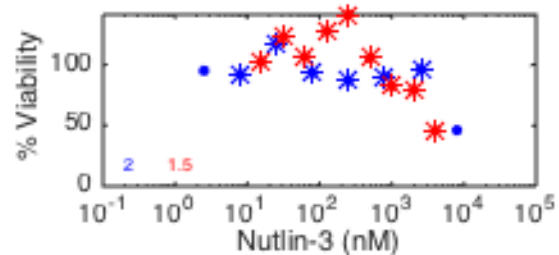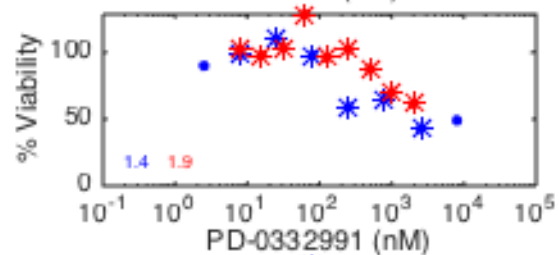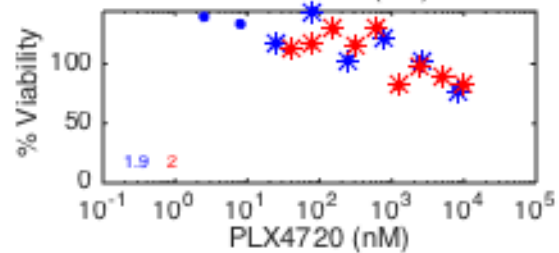

NCI-H2170

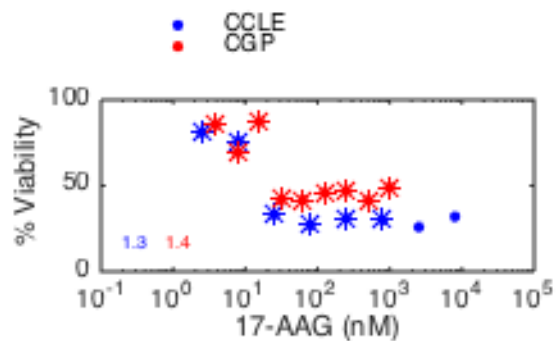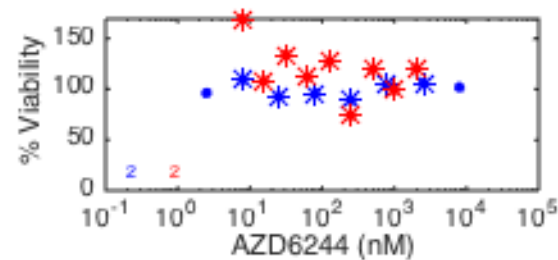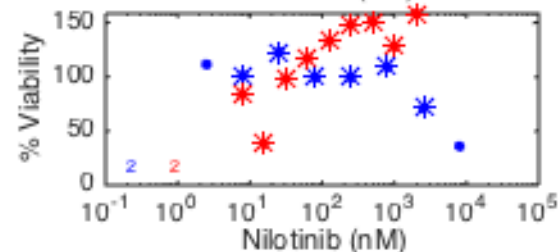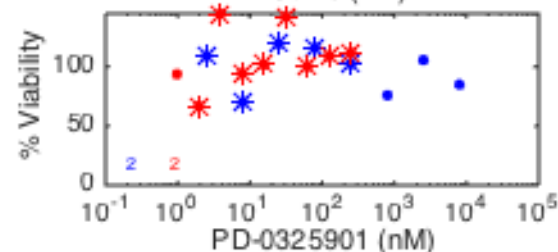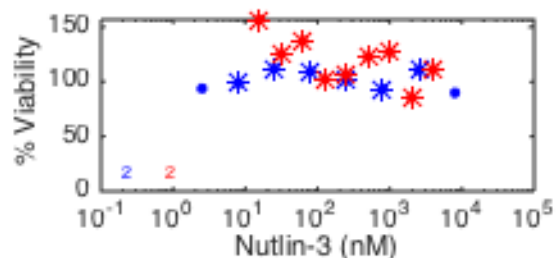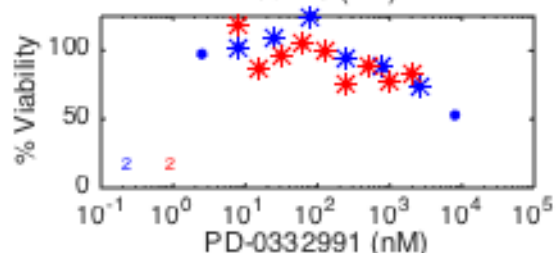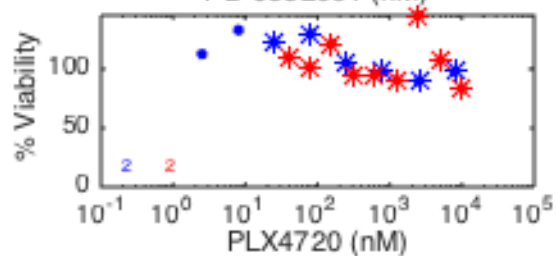

NCI-H2228

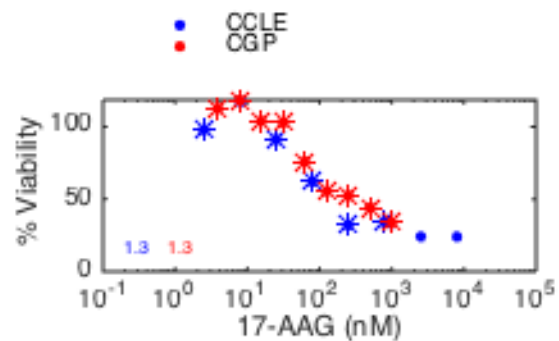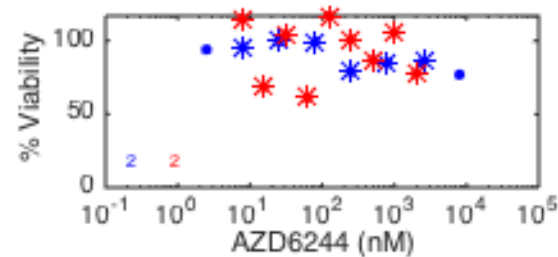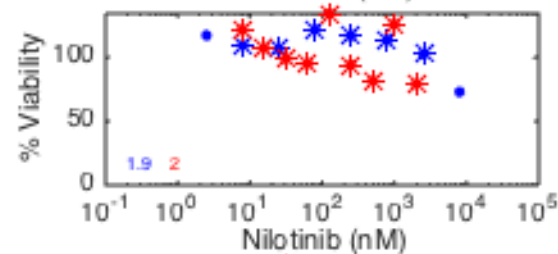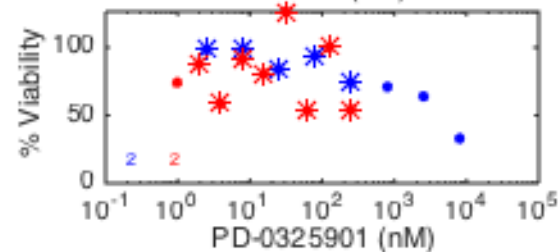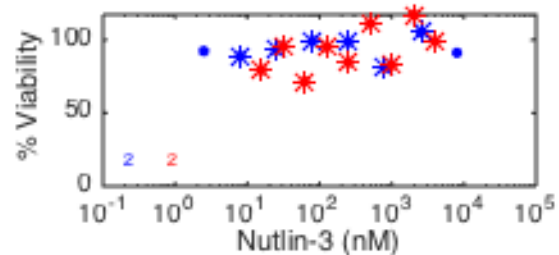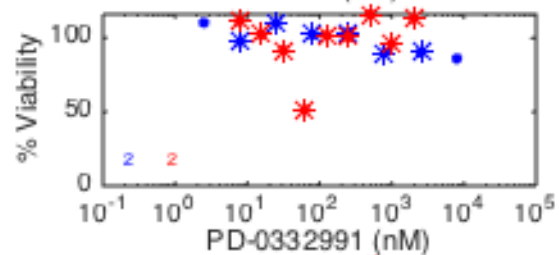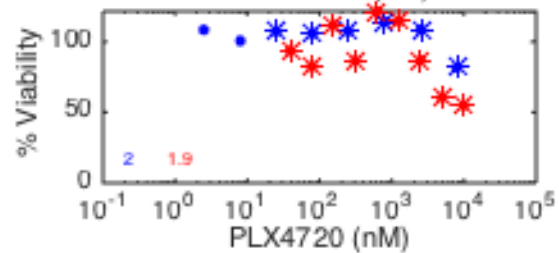

NCI-H2452

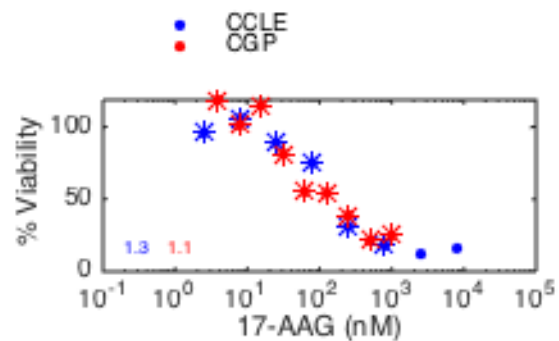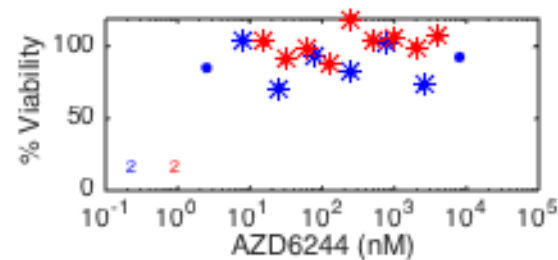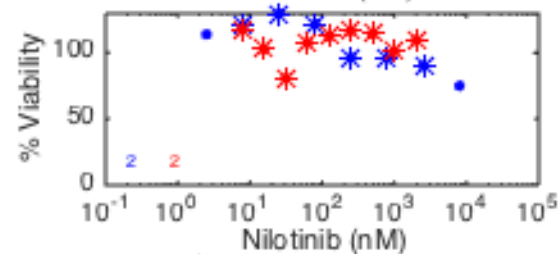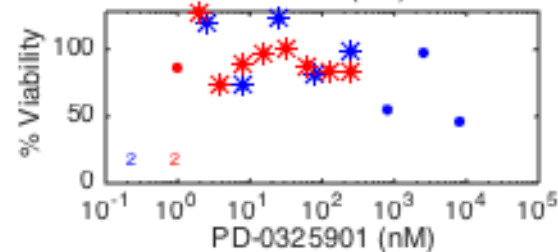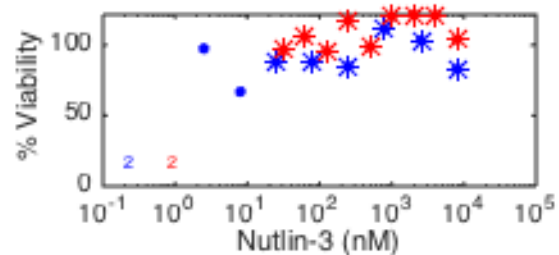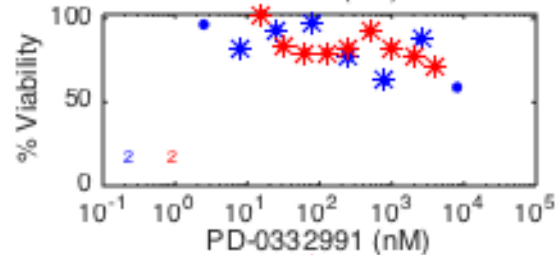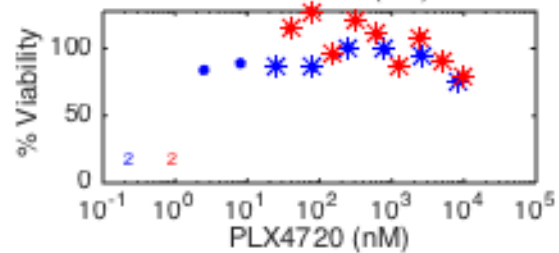

NCI-N87

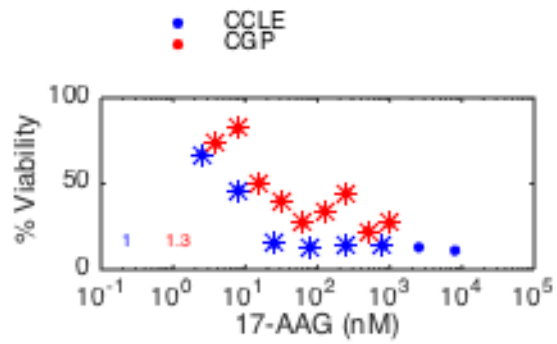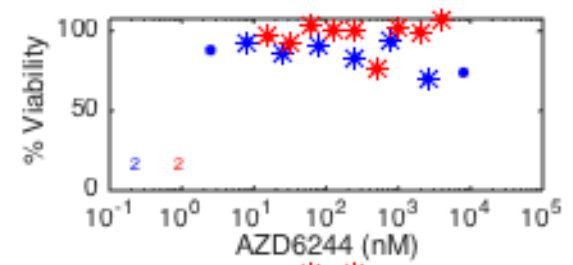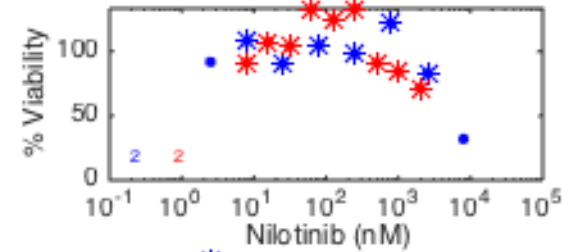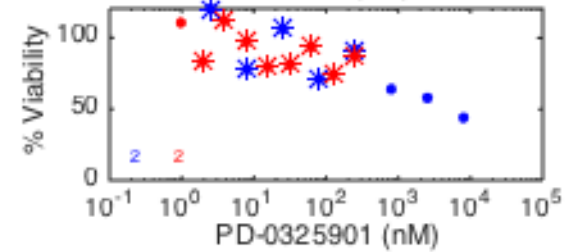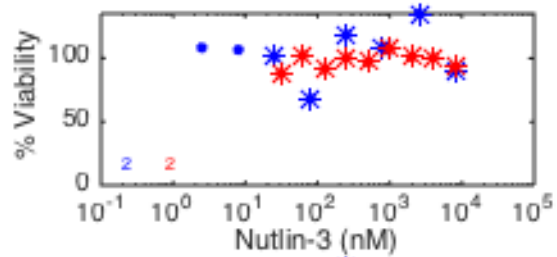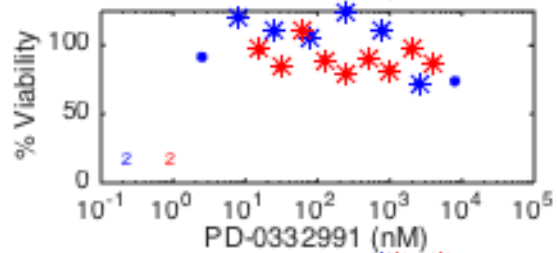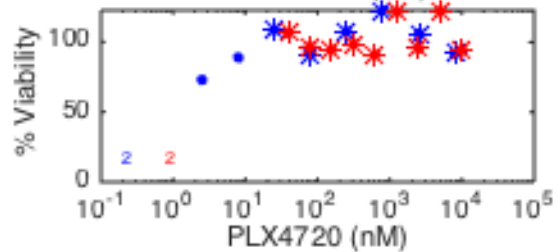



# NCI-SNU-1

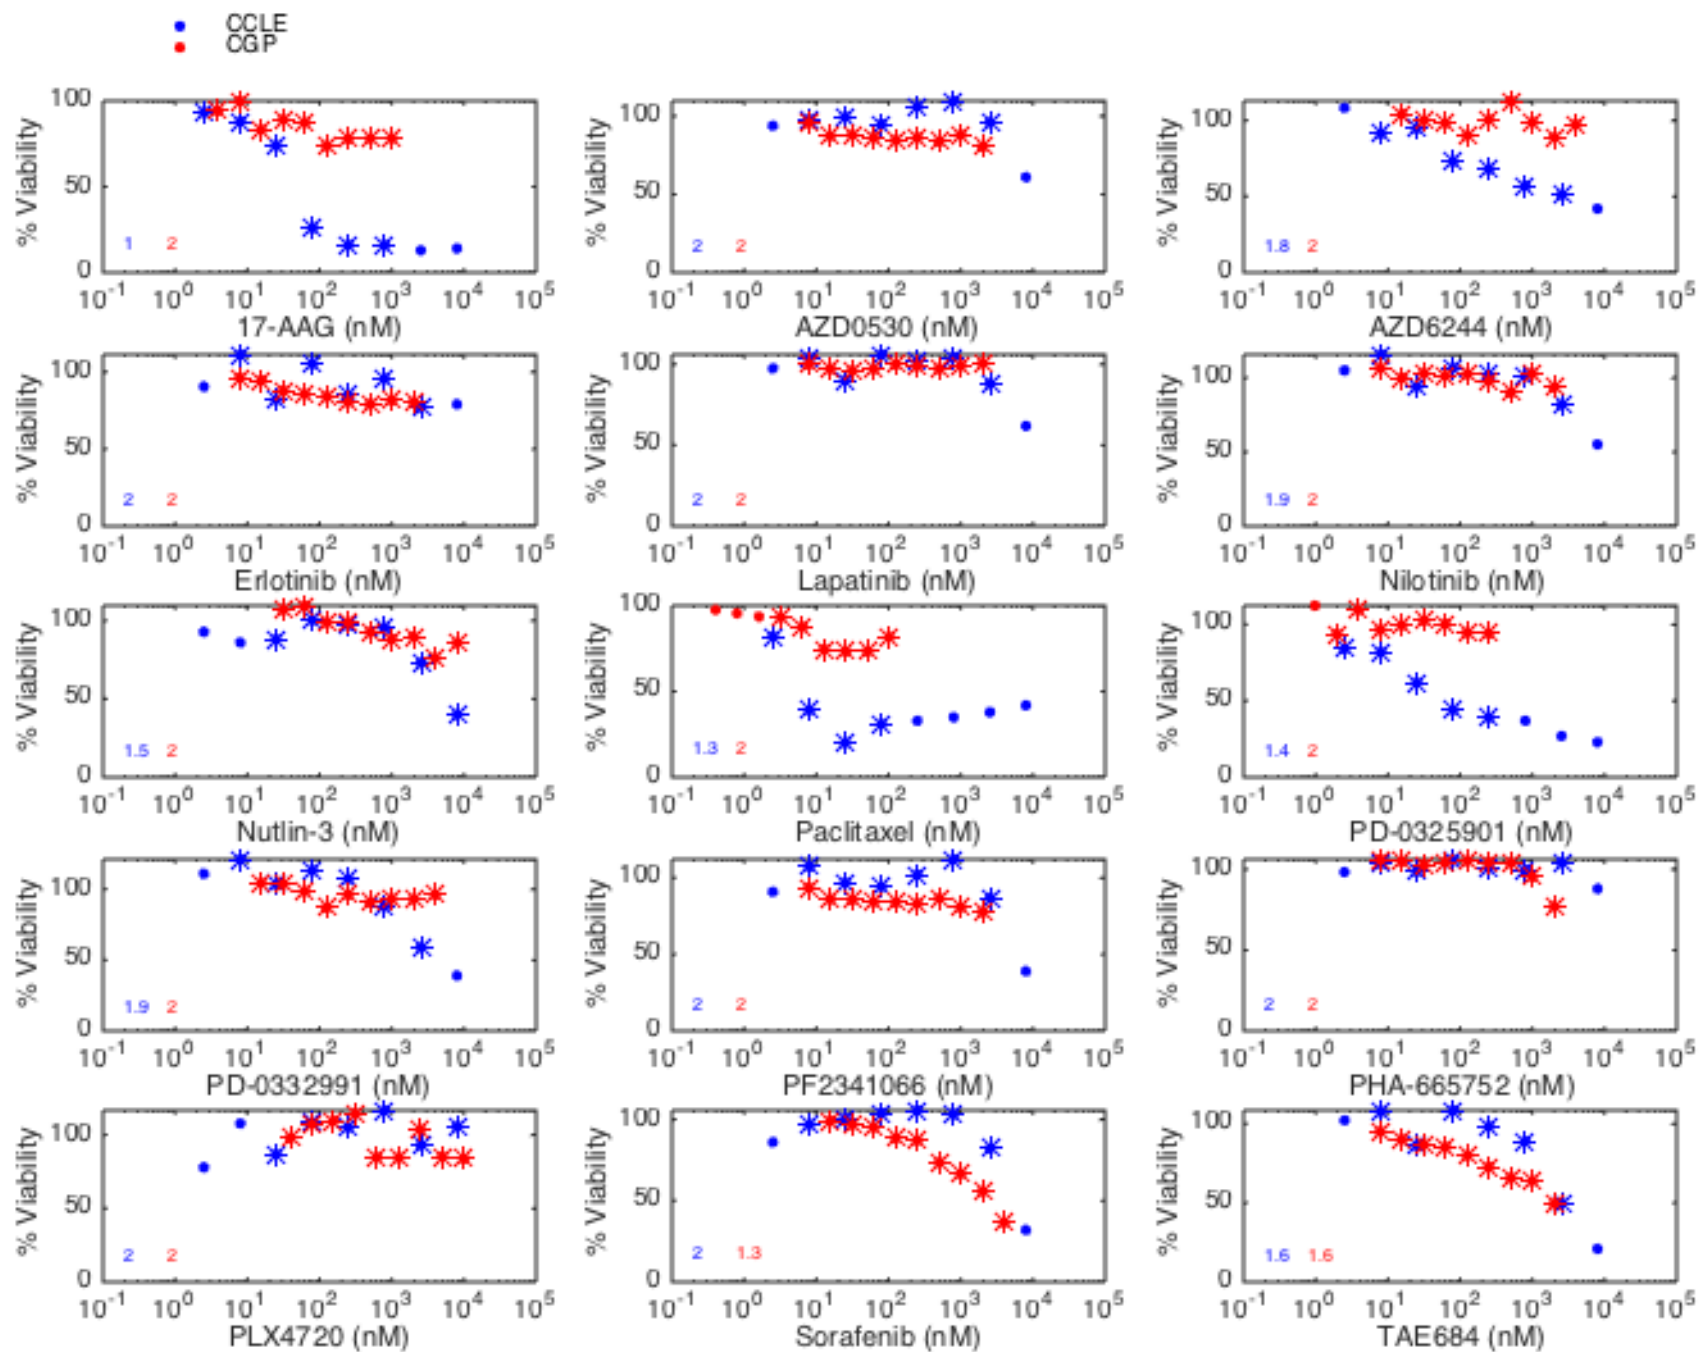

# NCI-SNU-16

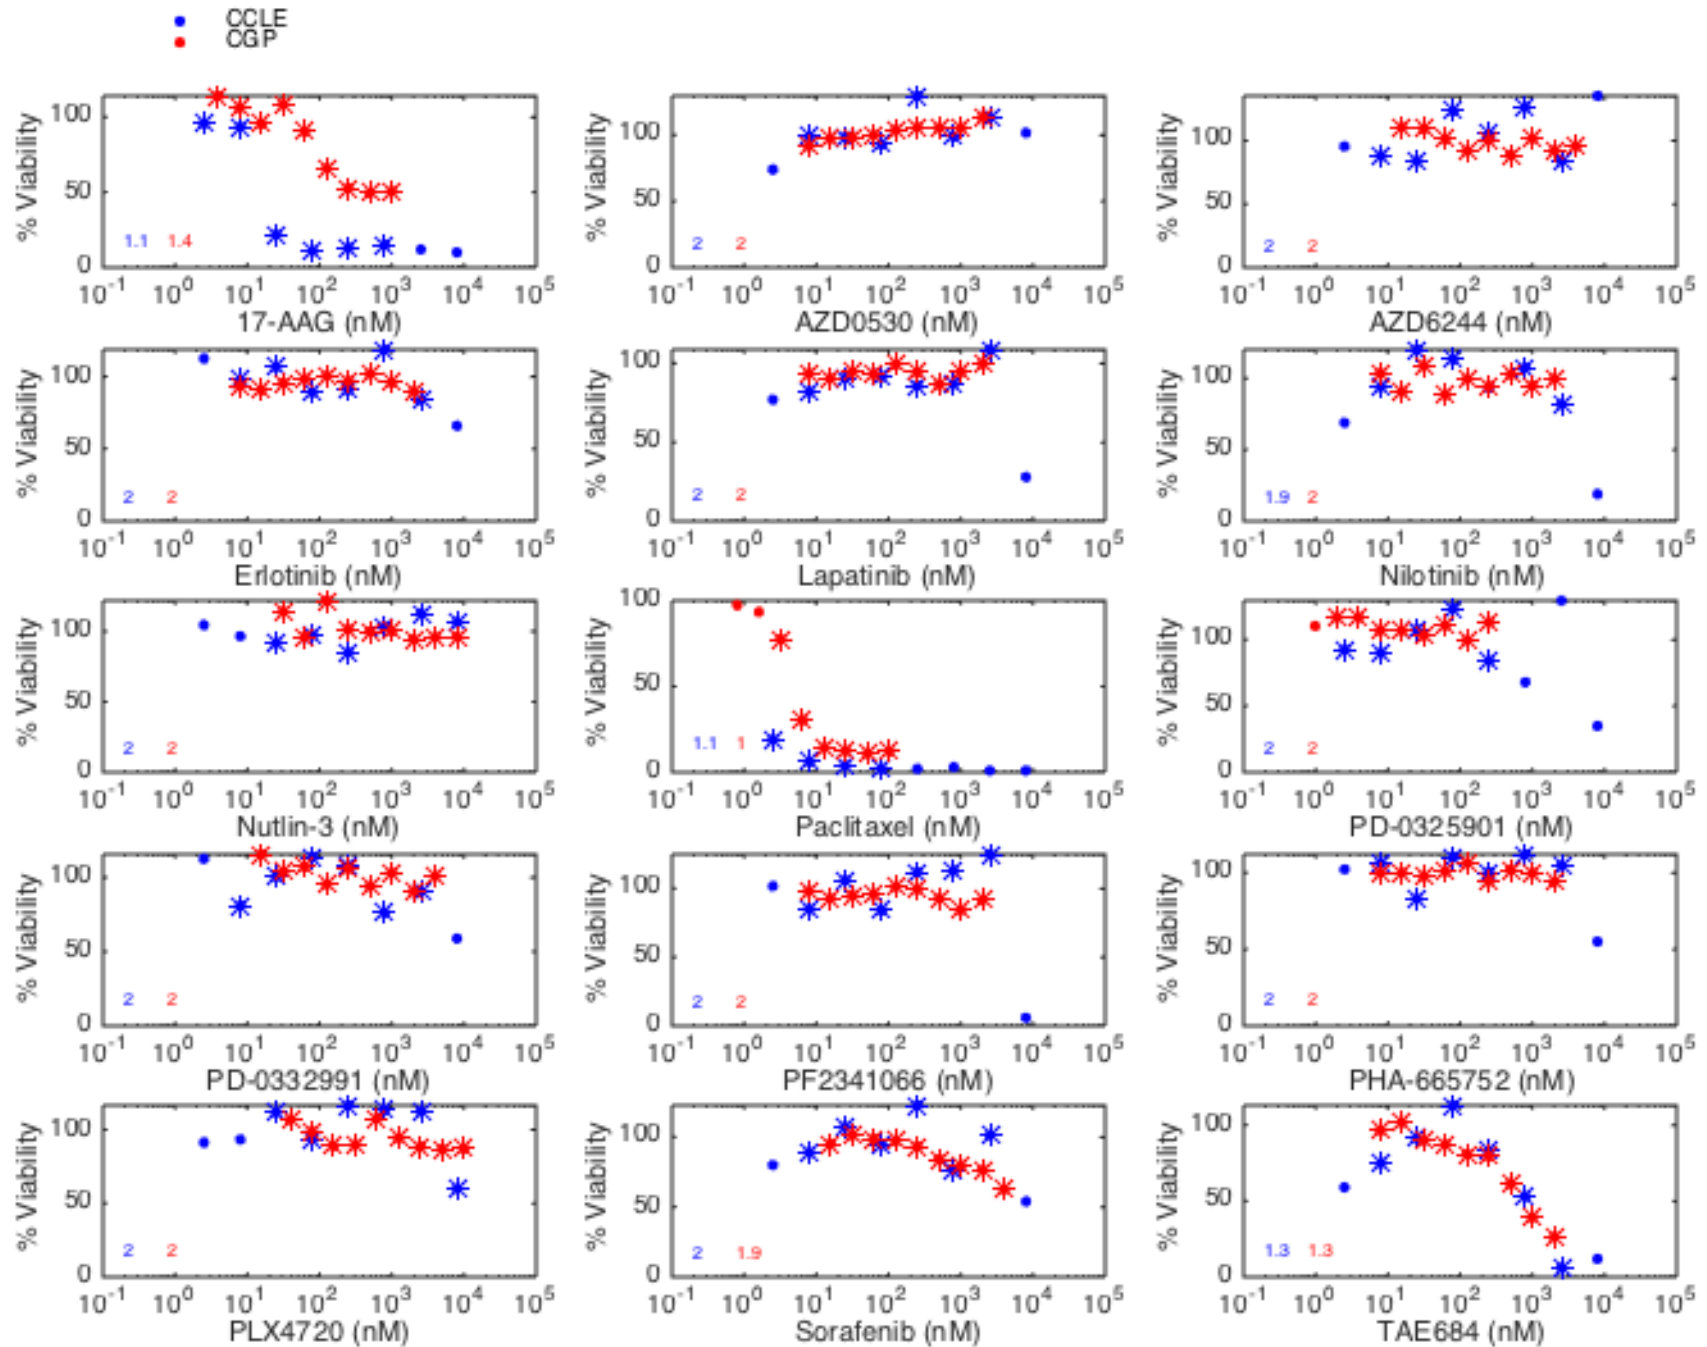

# NUGC-3

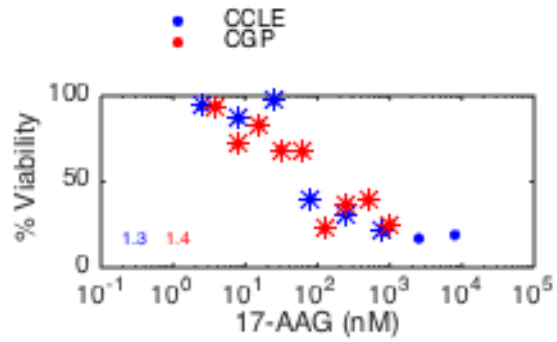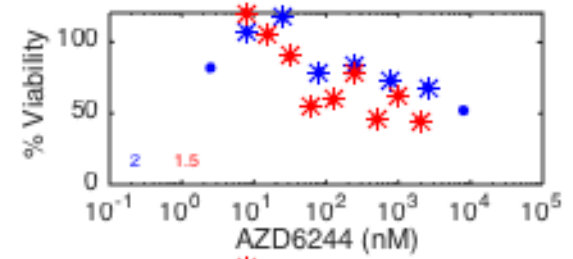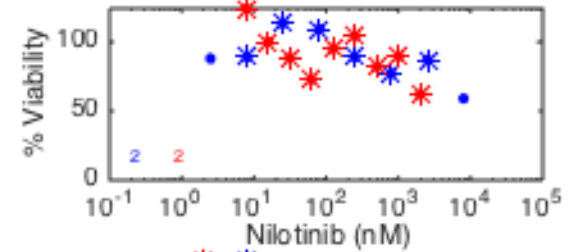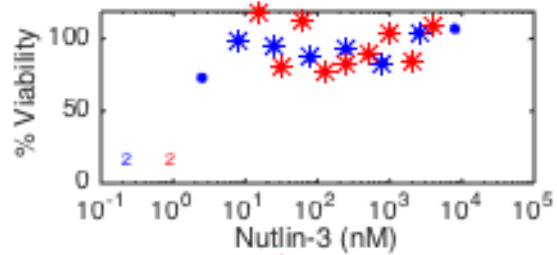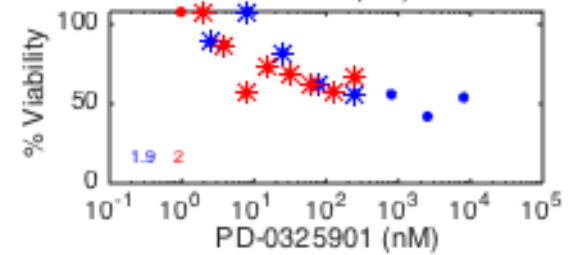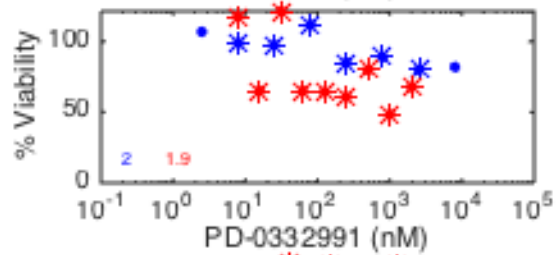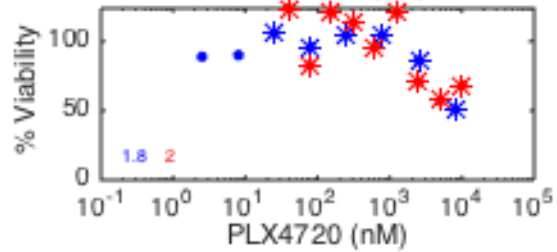

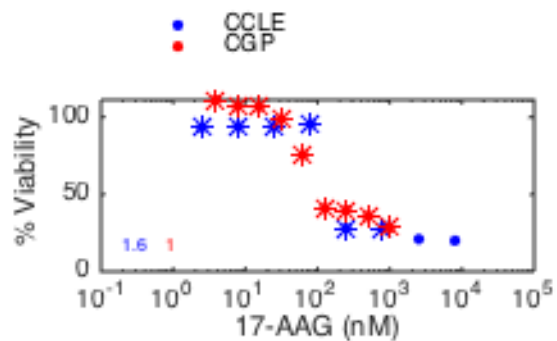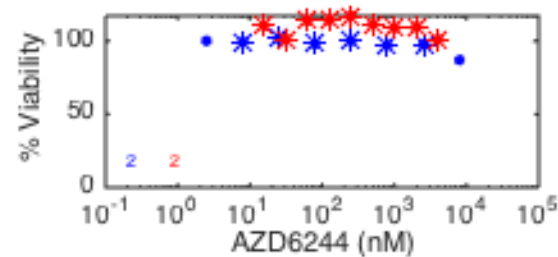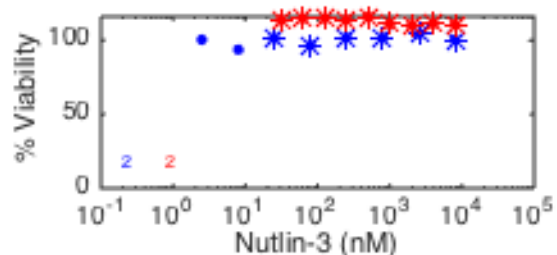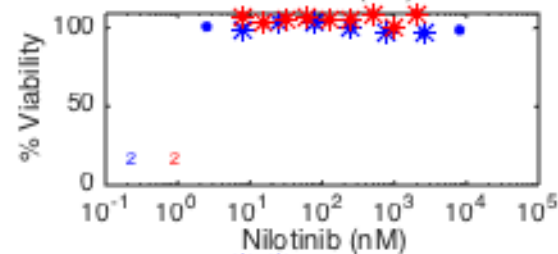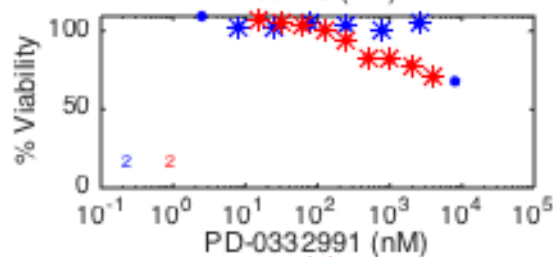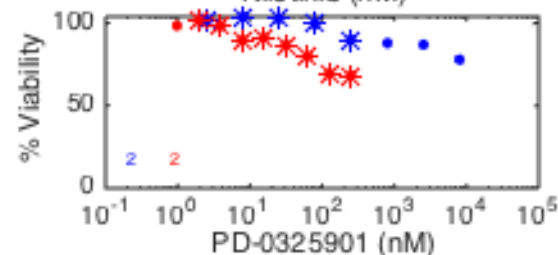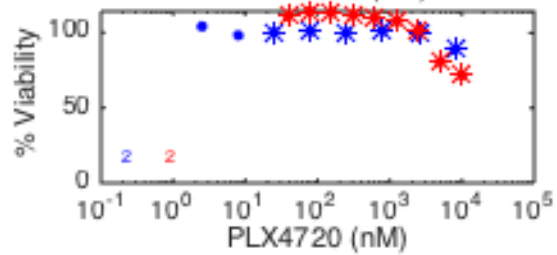

# OCI-AML2

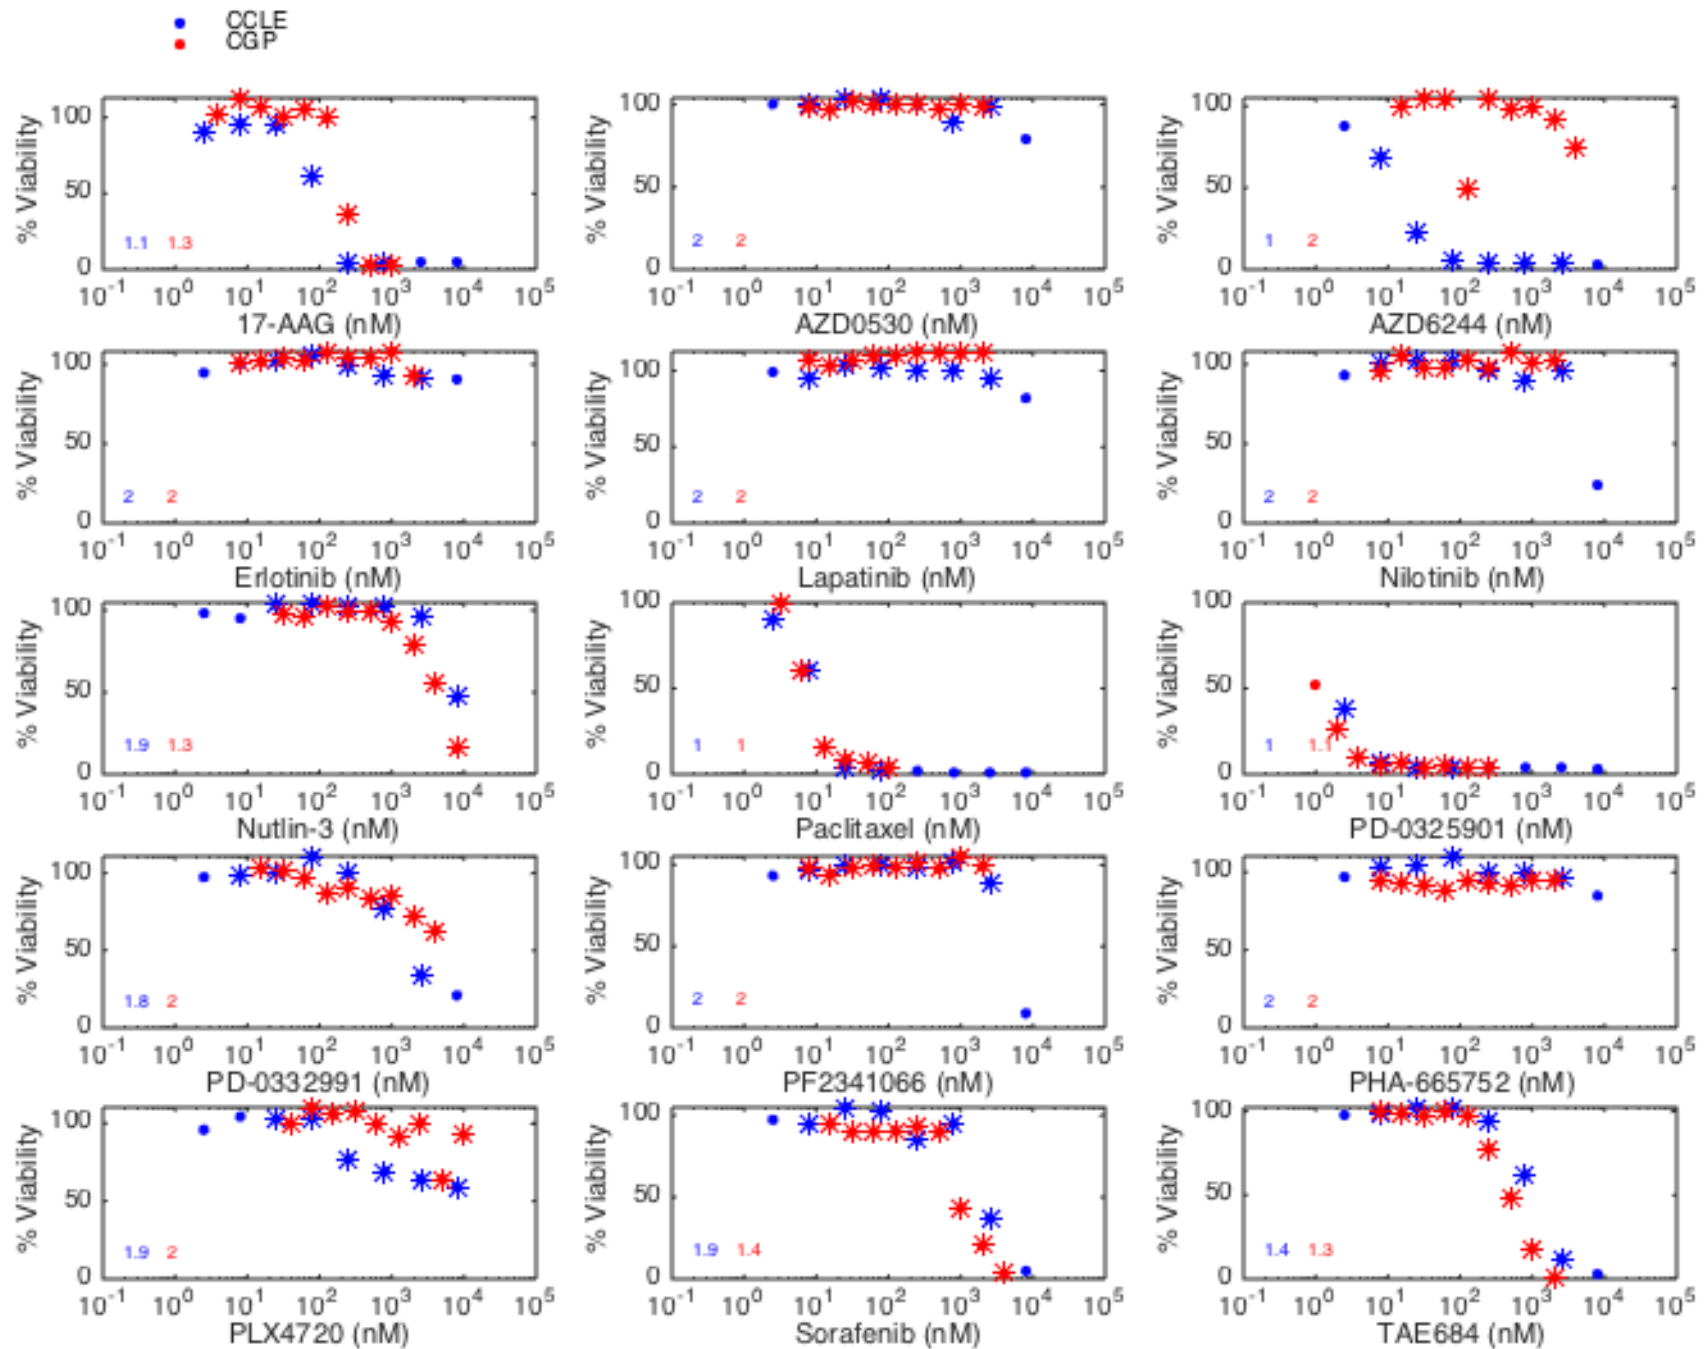

OE33

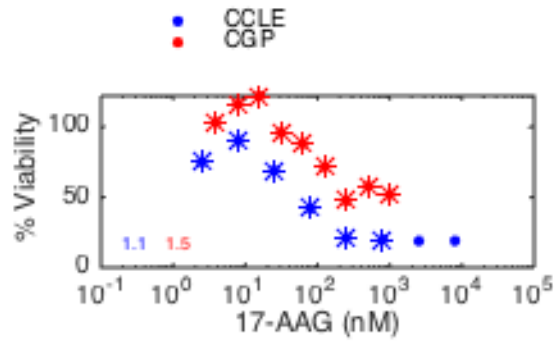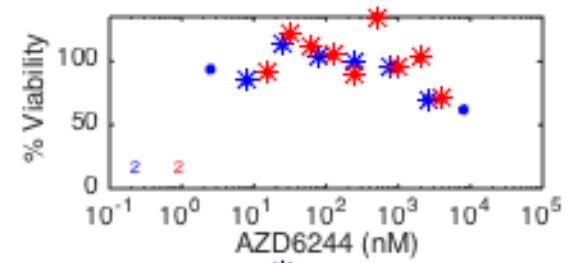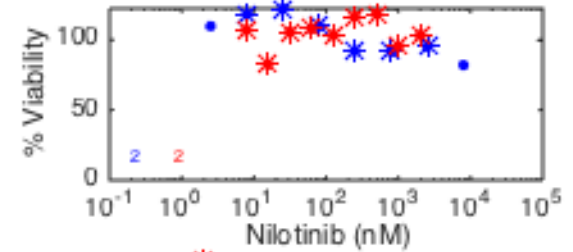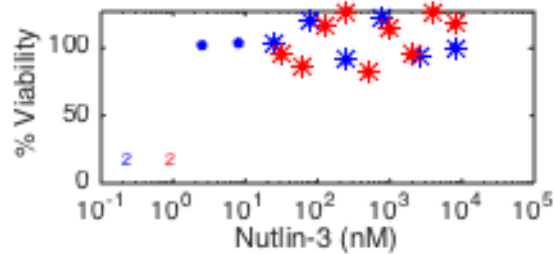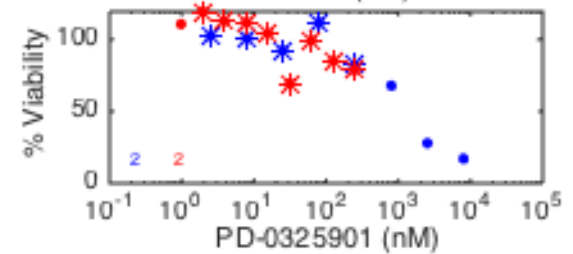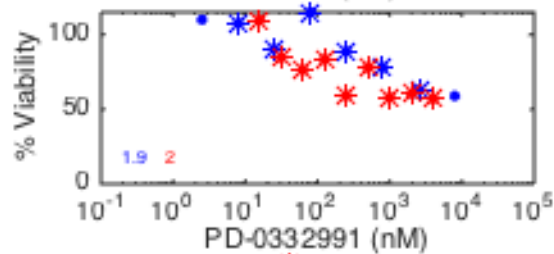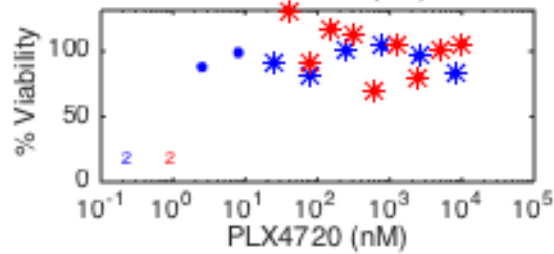

# ONS-76

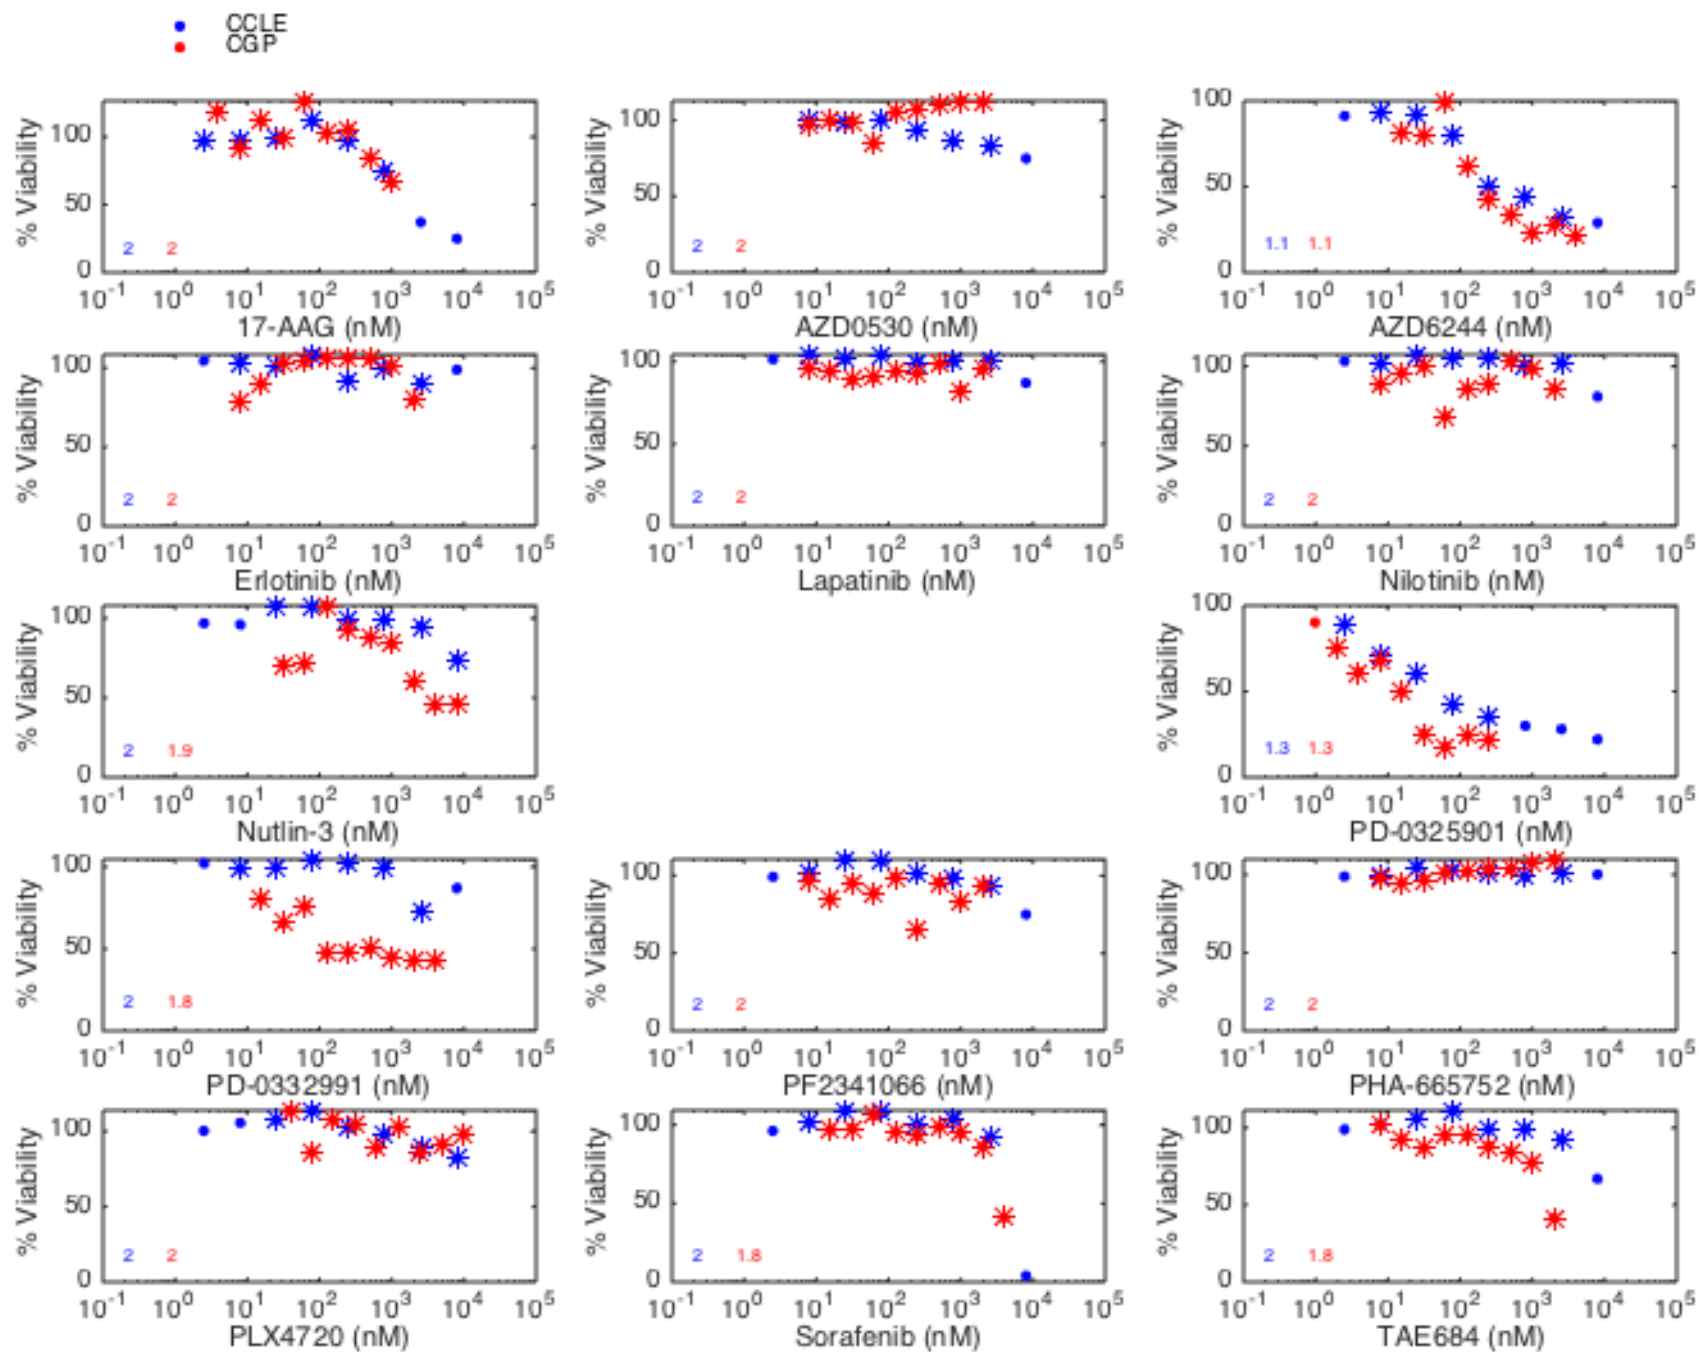

# OPM-2

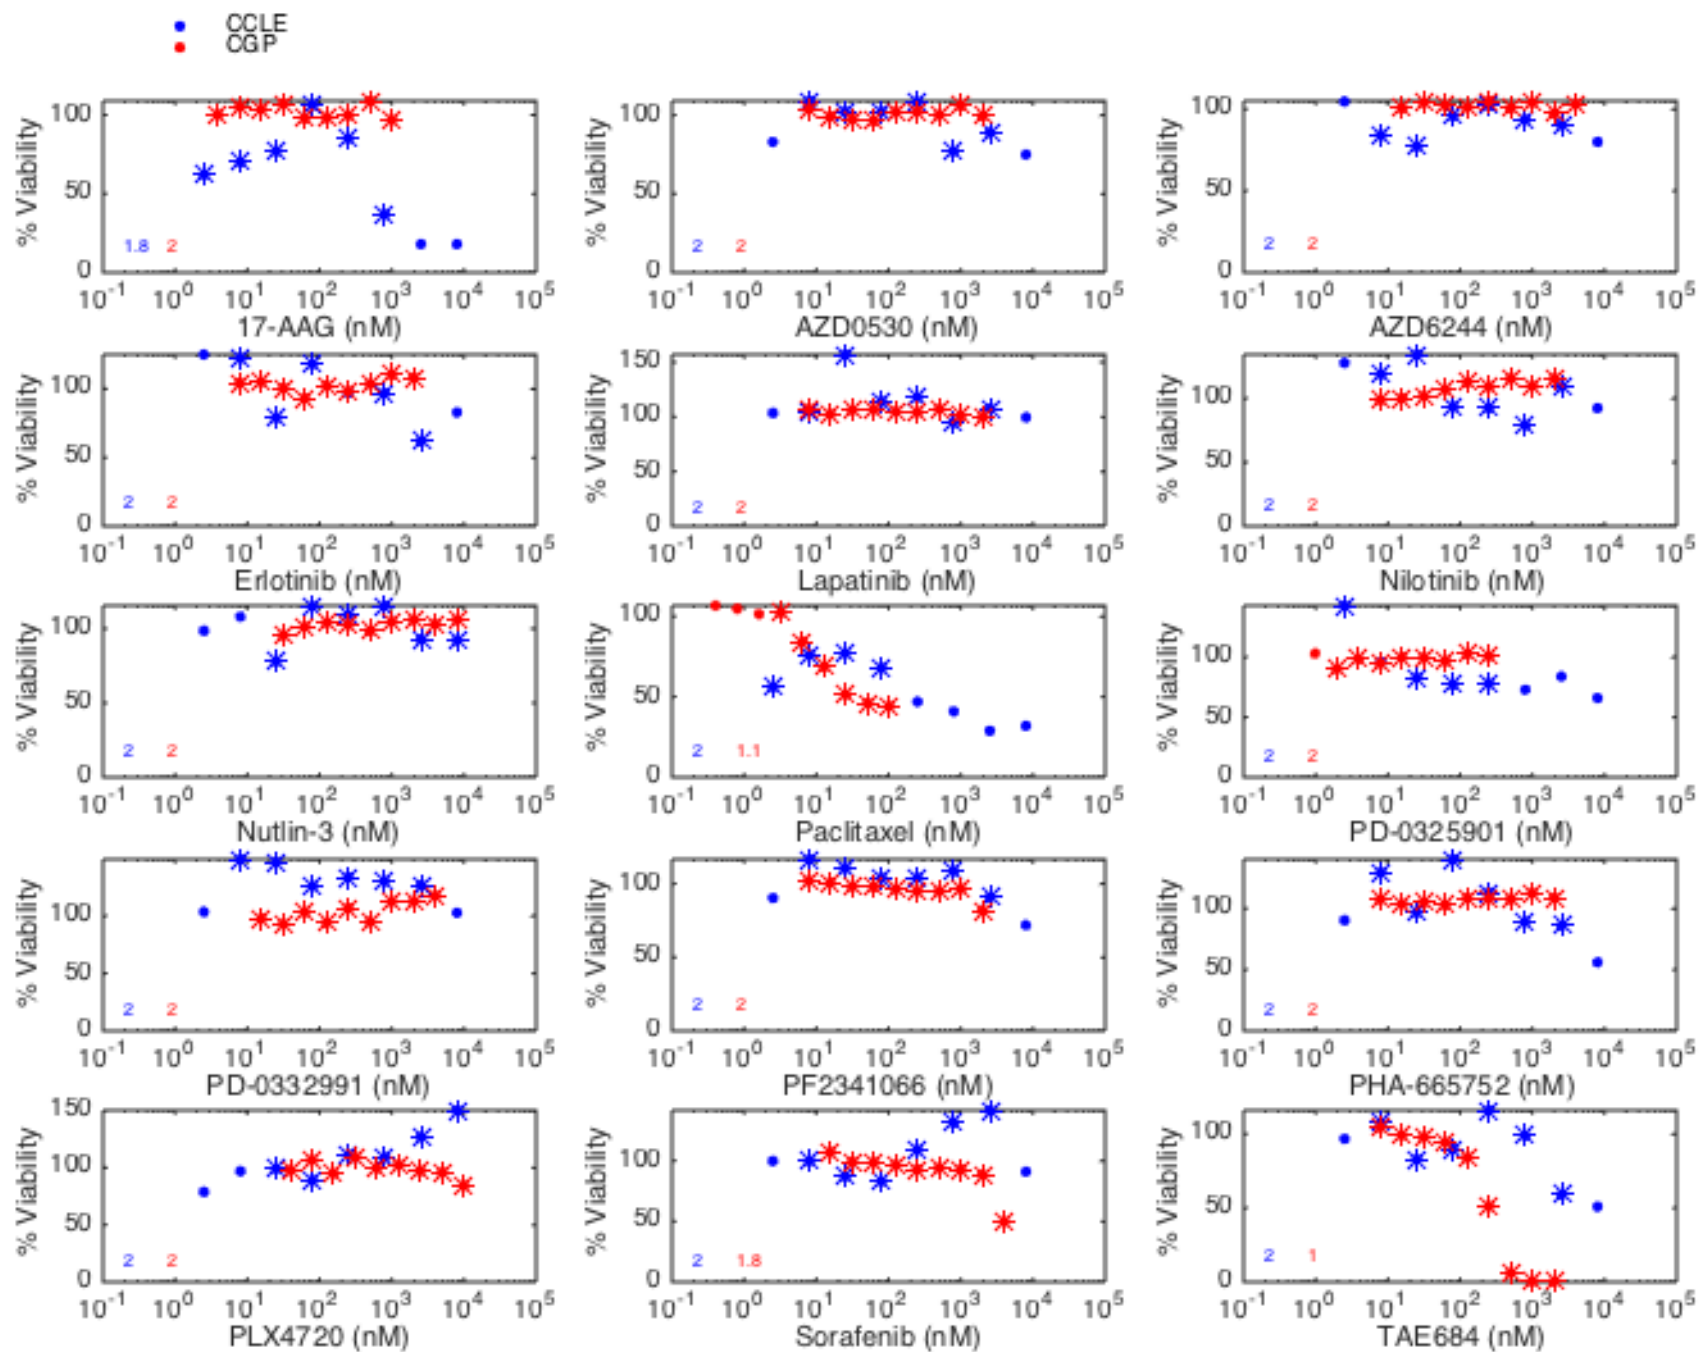



# OVCAR-3

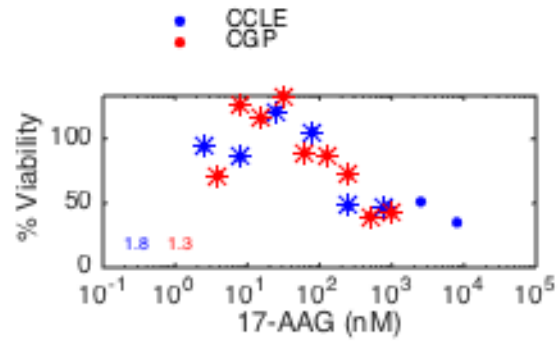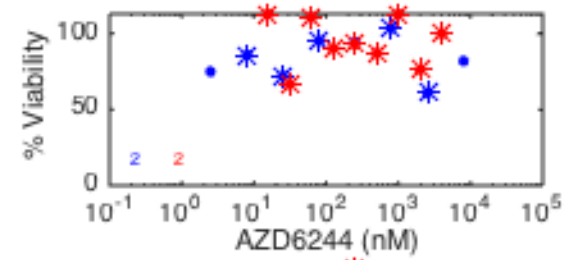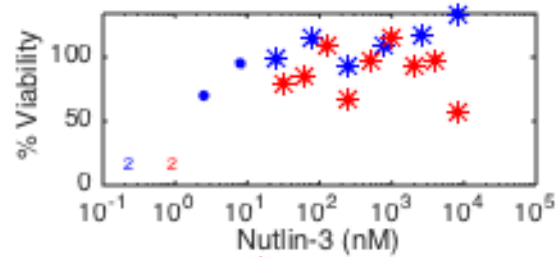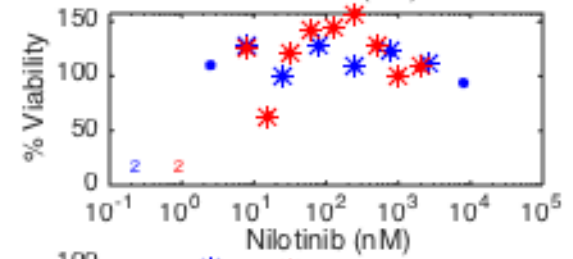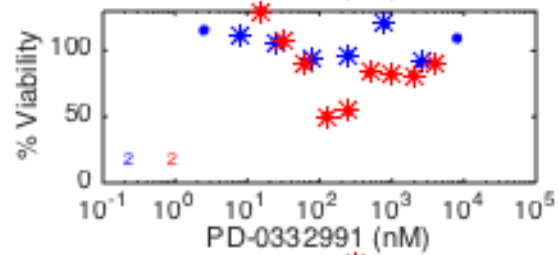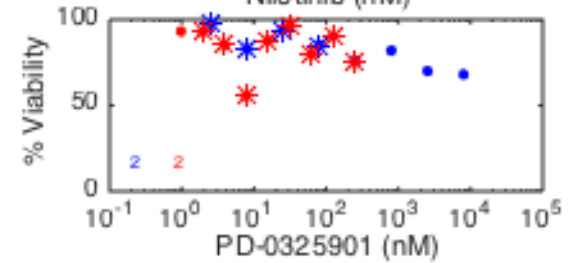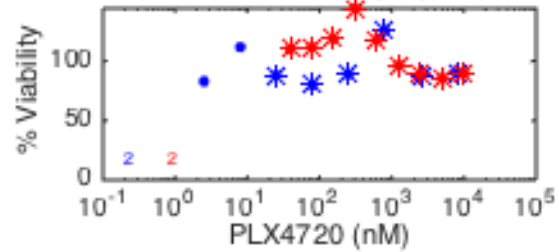

# OVCAR-4

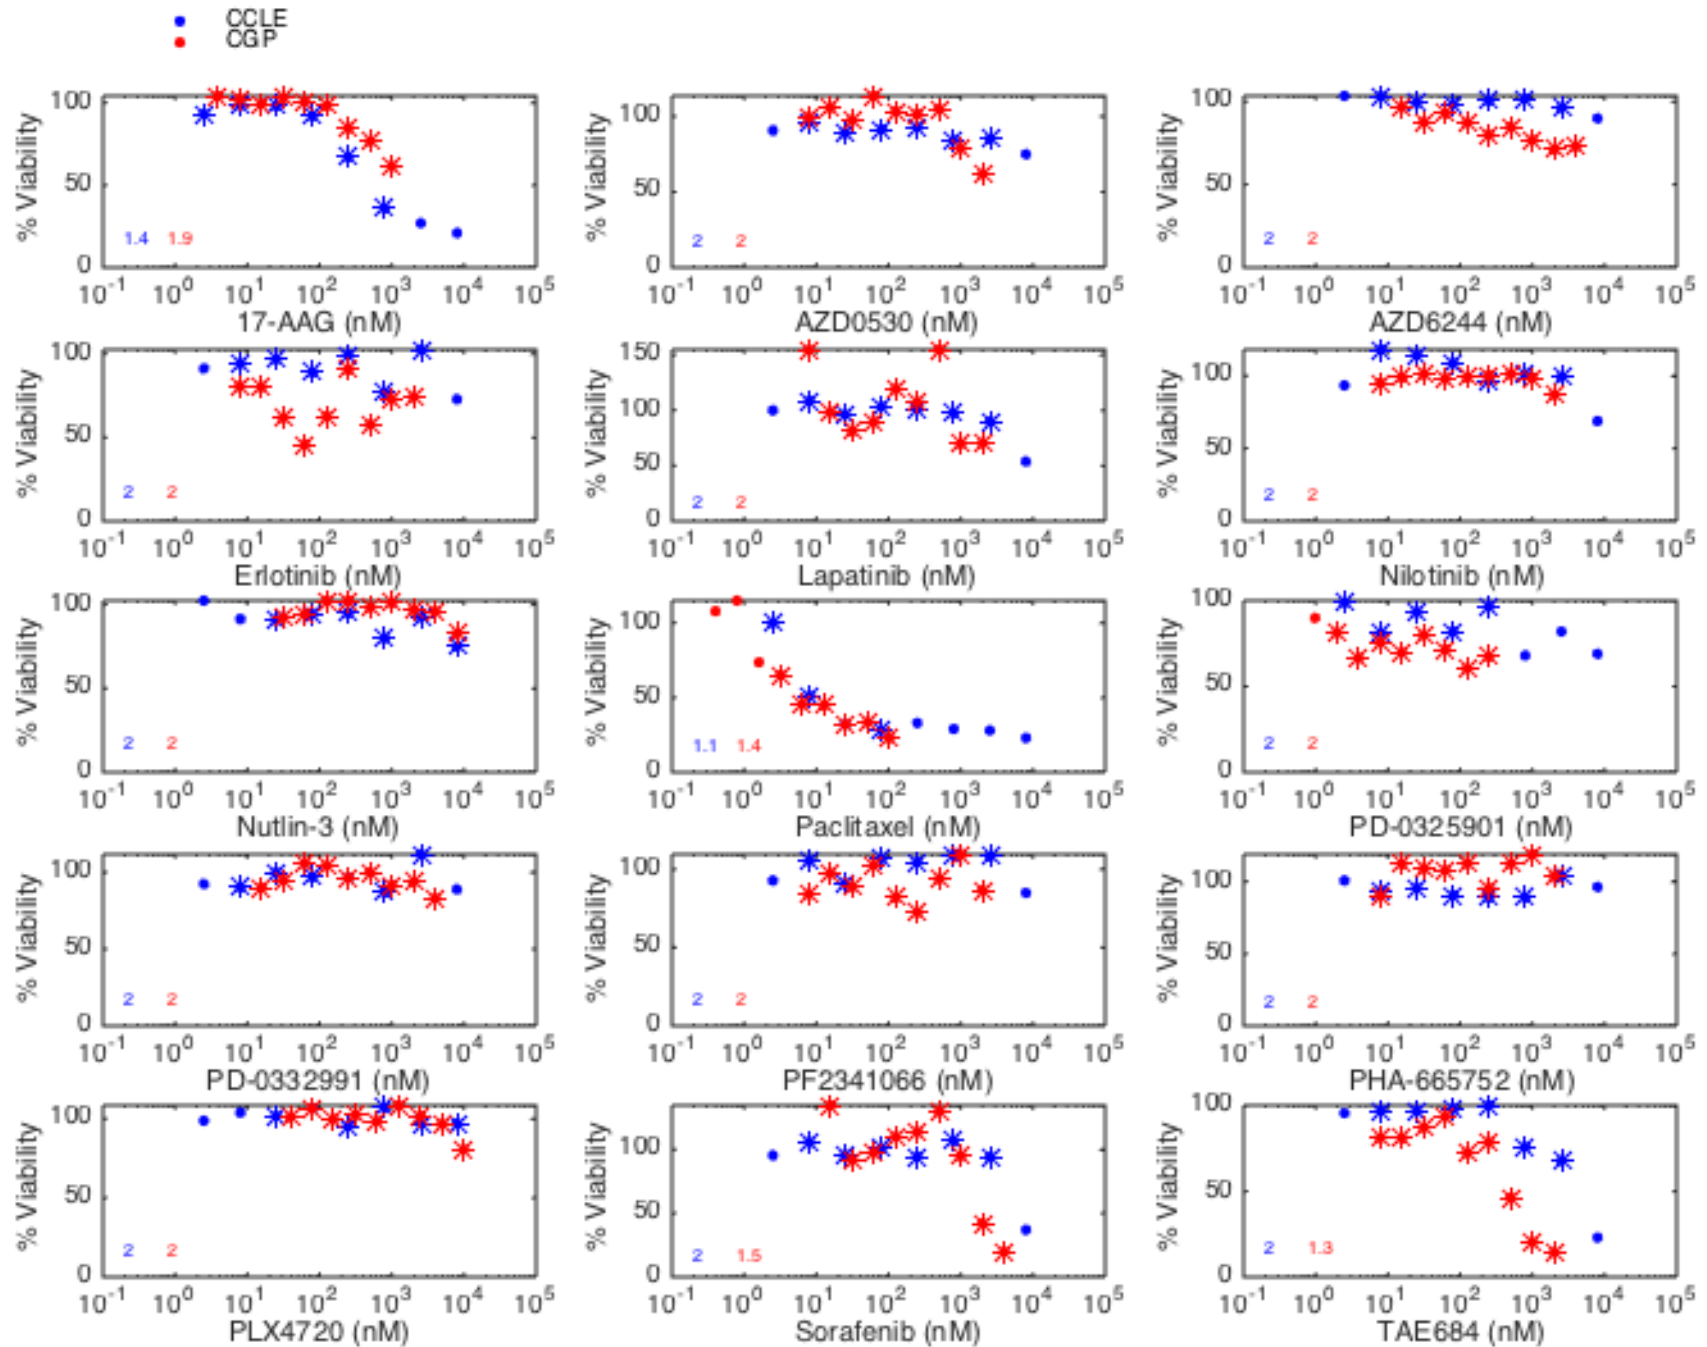

# OVCAR-8

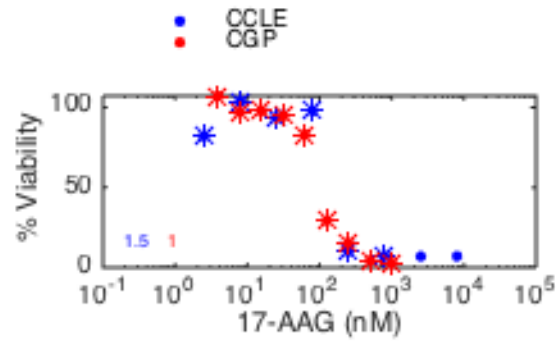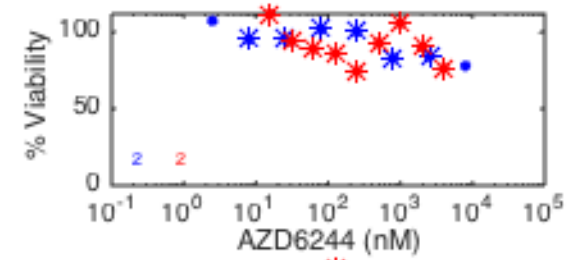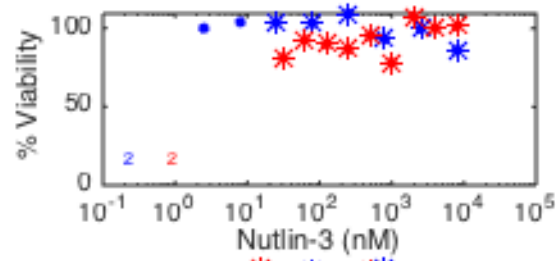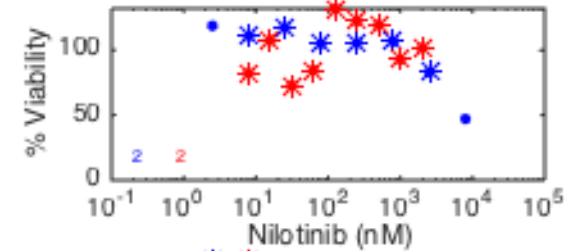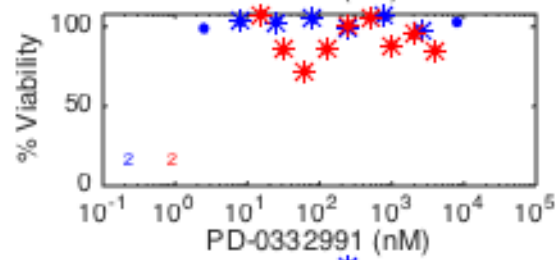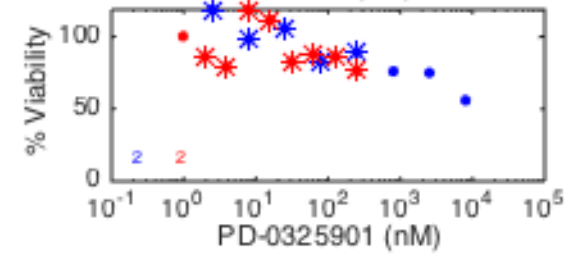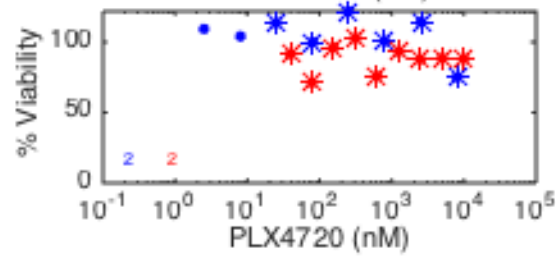

# P12-ICHIKAWA

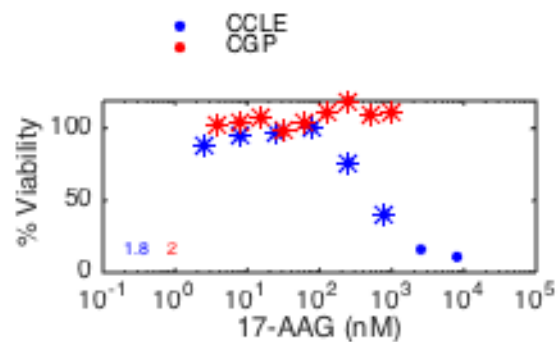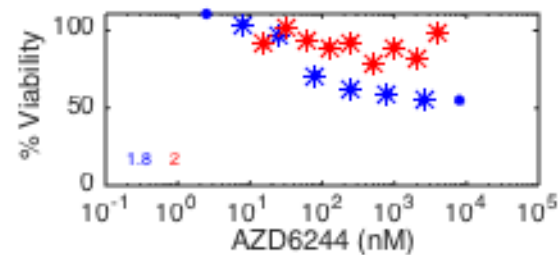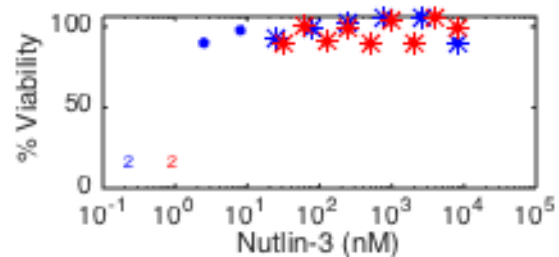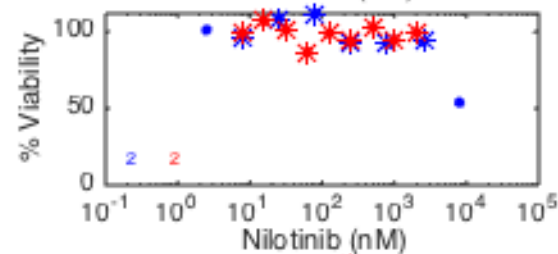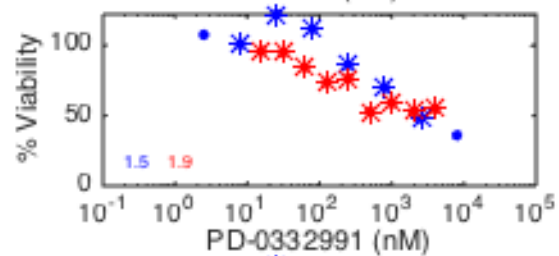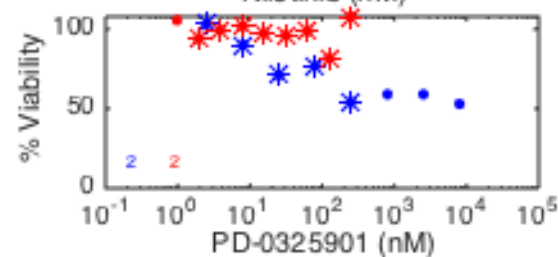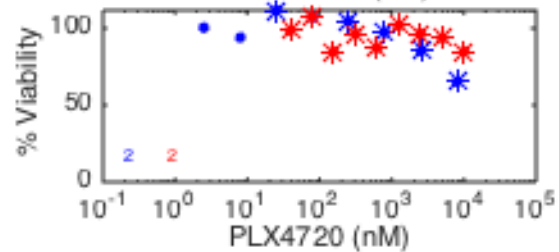

# P31-FUJ

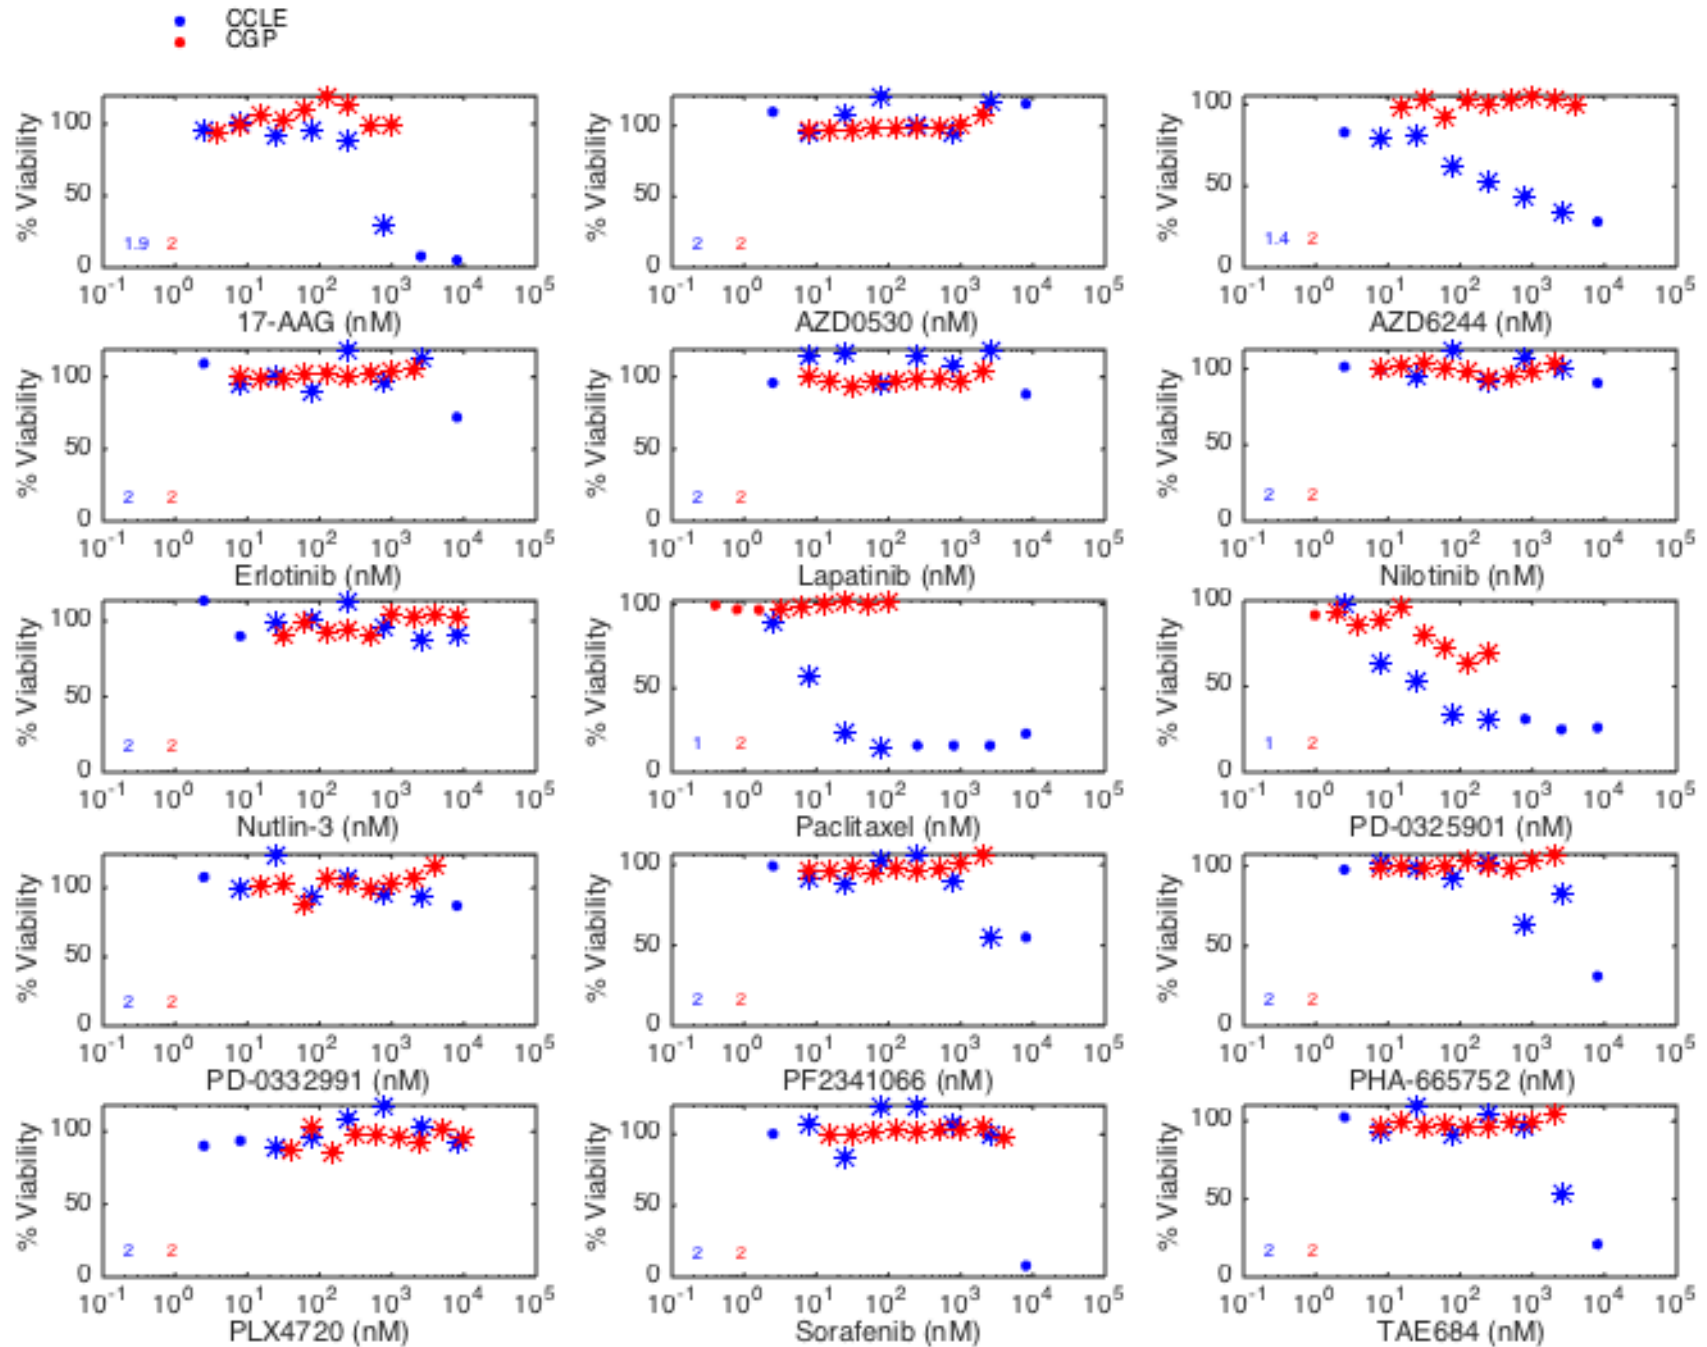

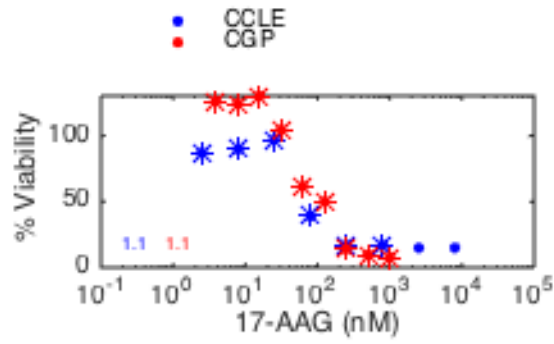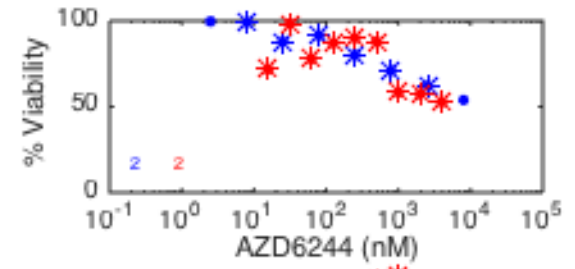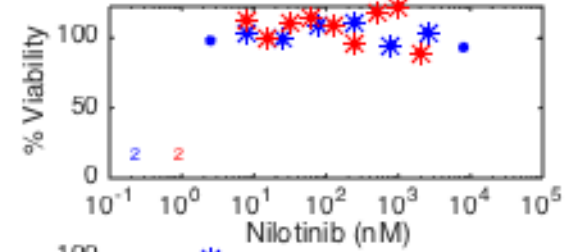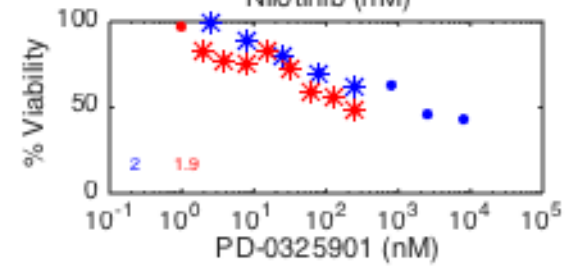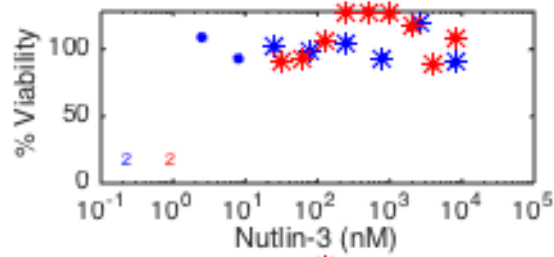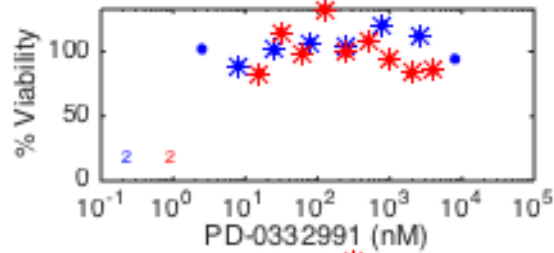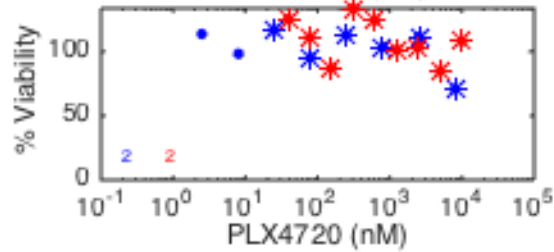

PANC-10-05

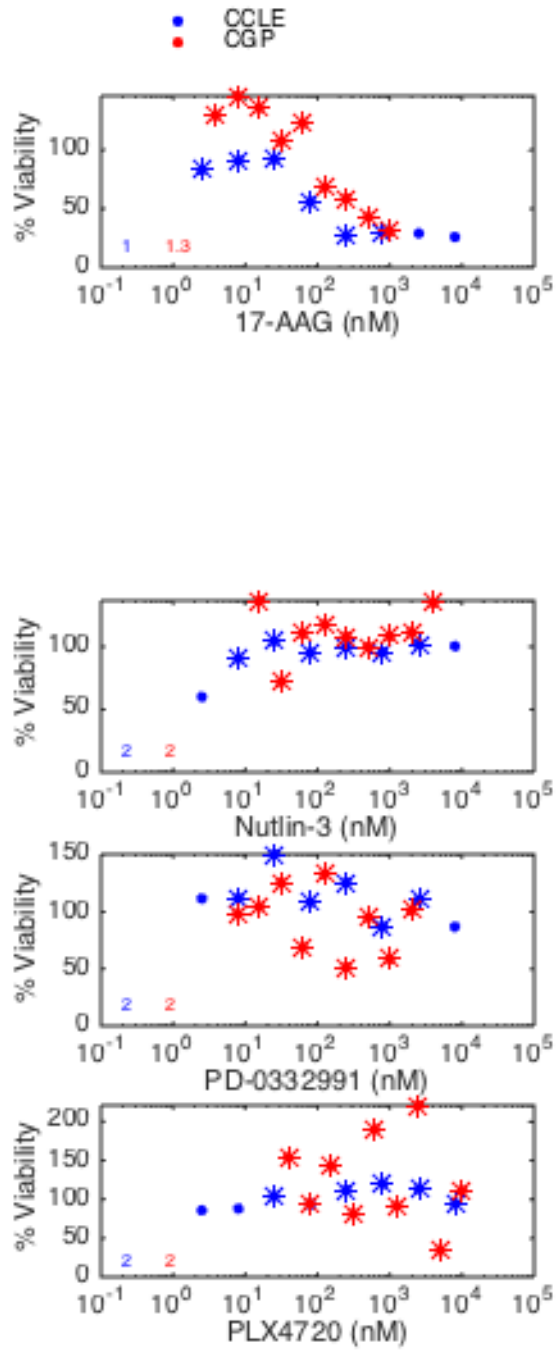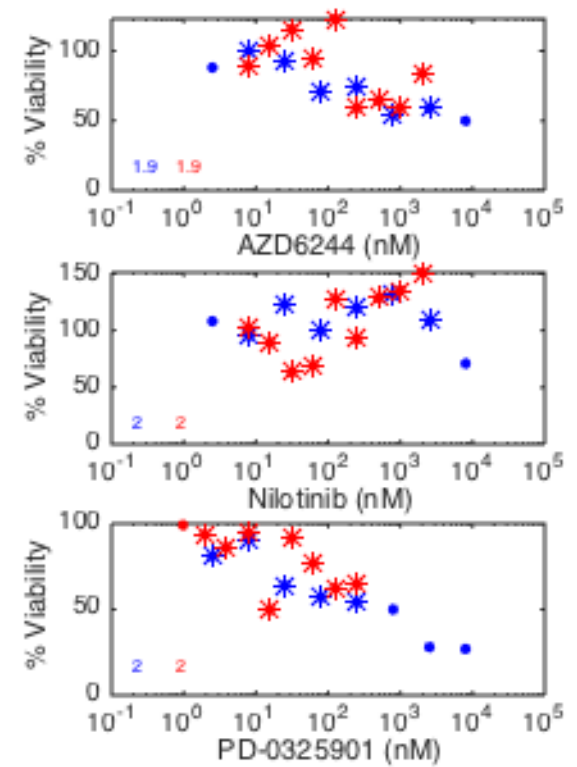

PC-3

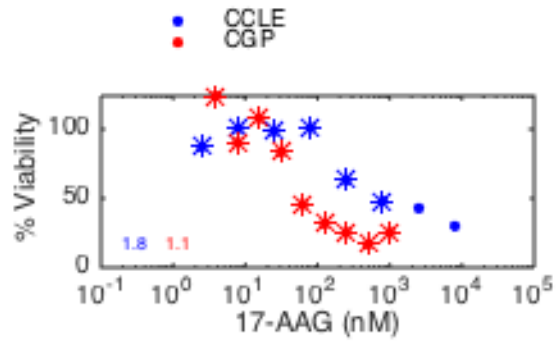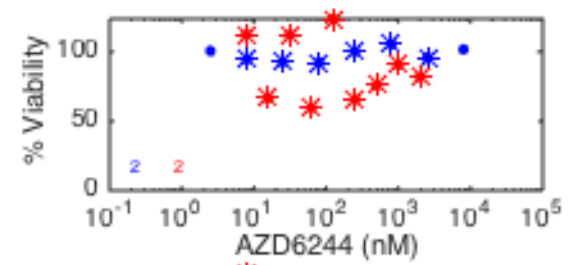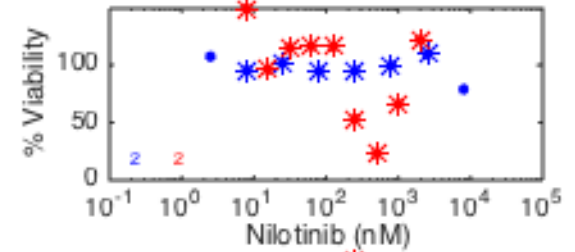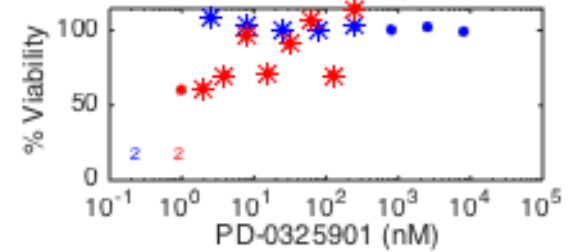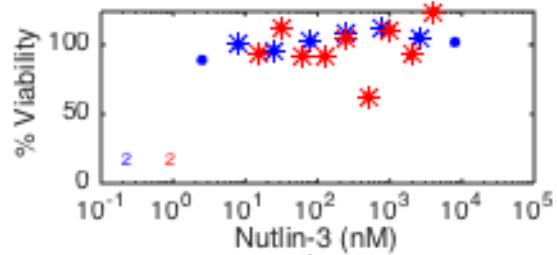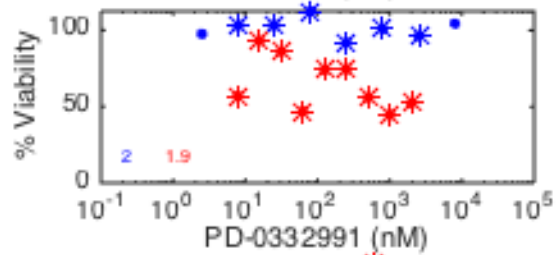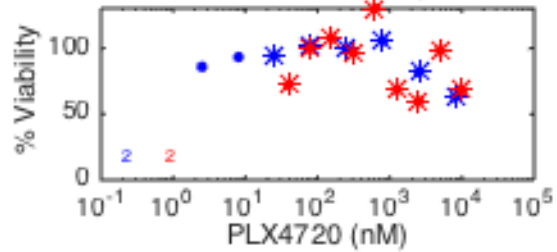



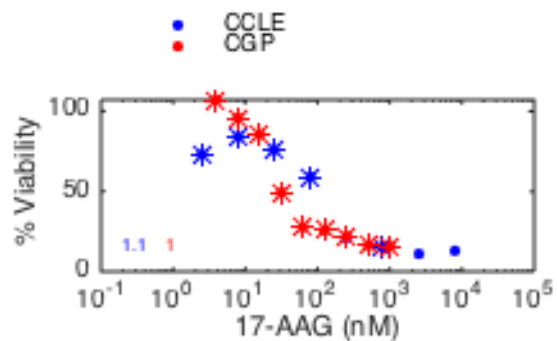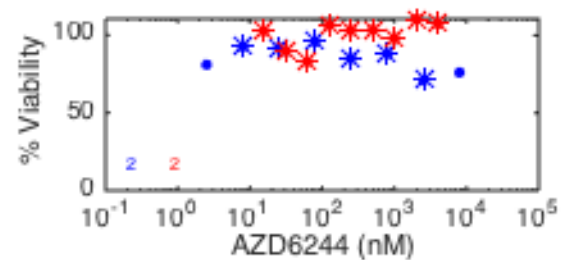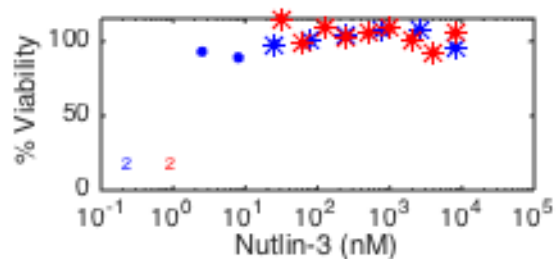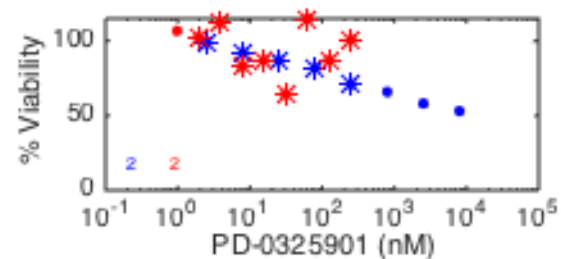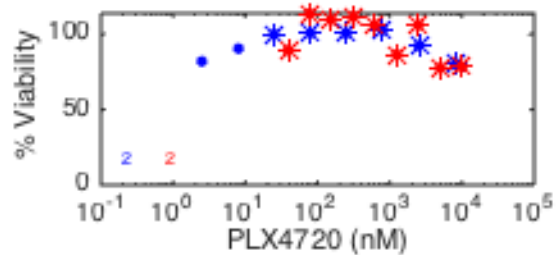

# PSN1

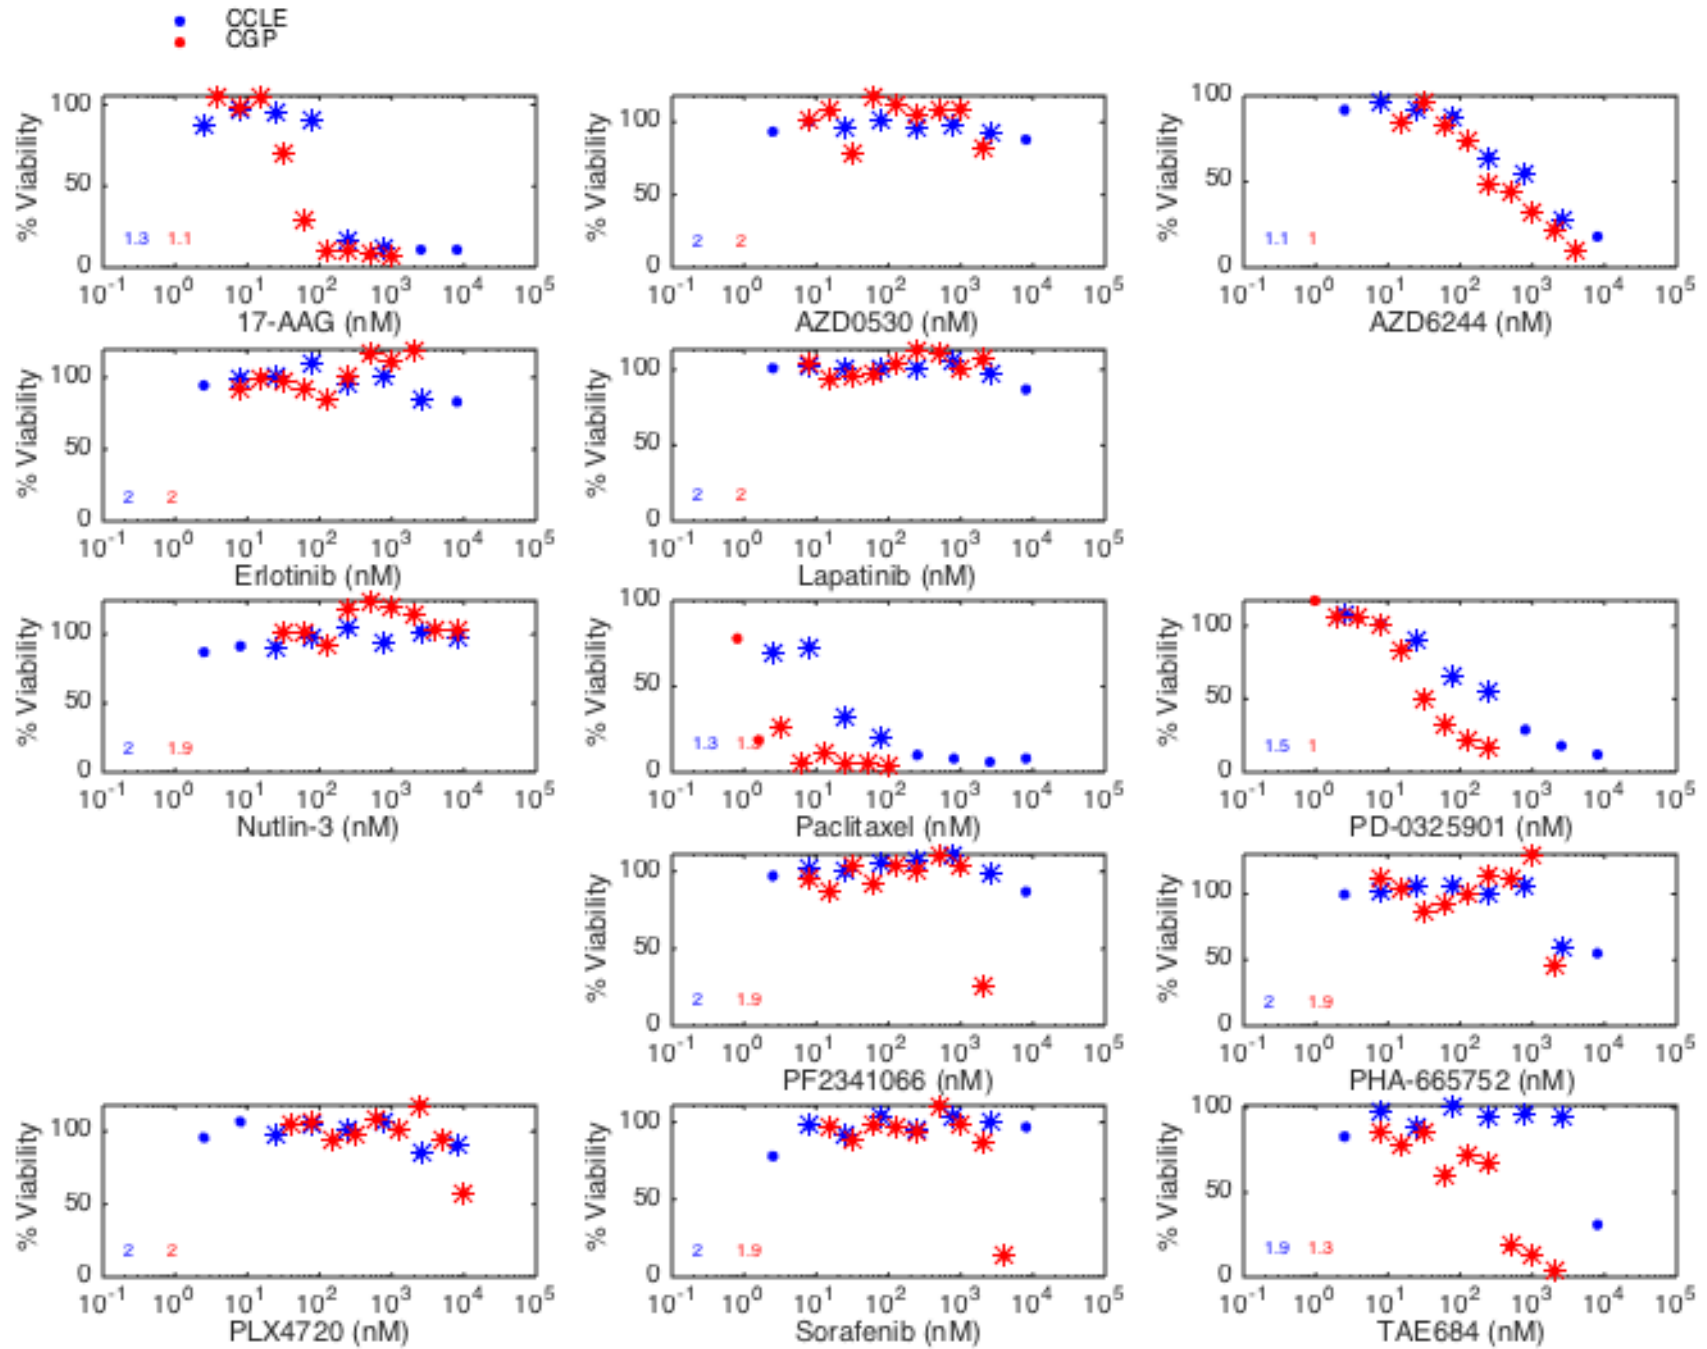

# Raji

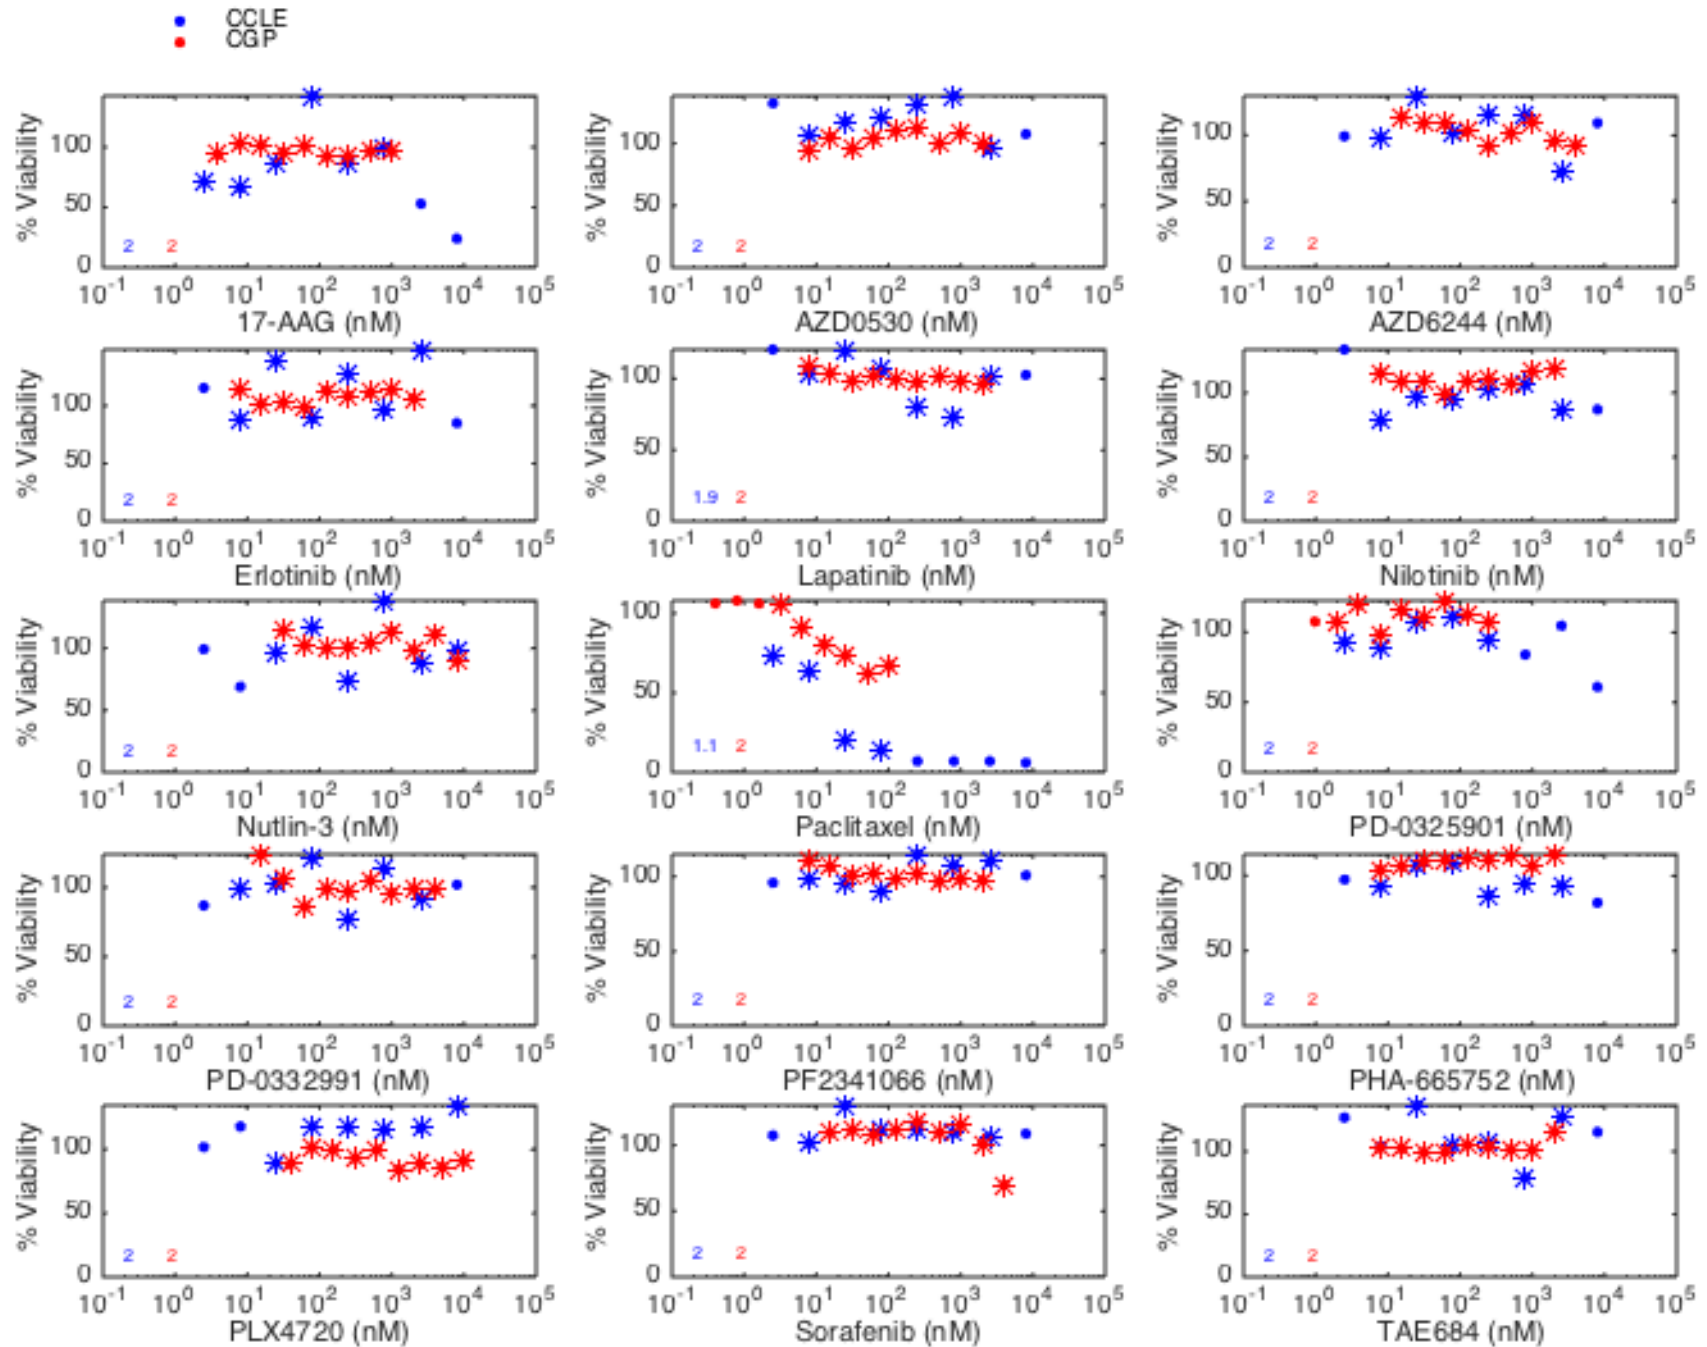

RD

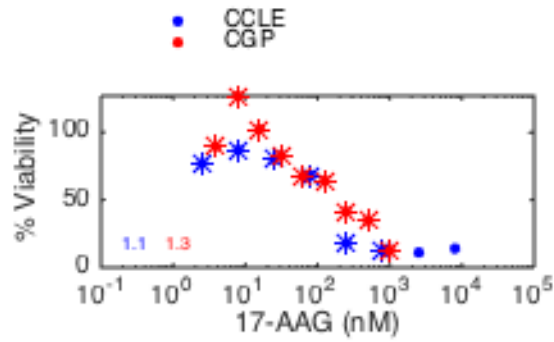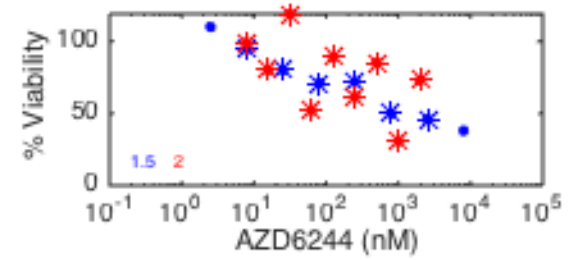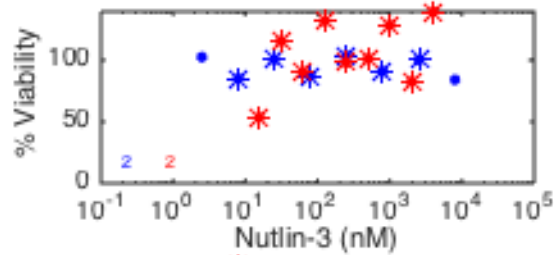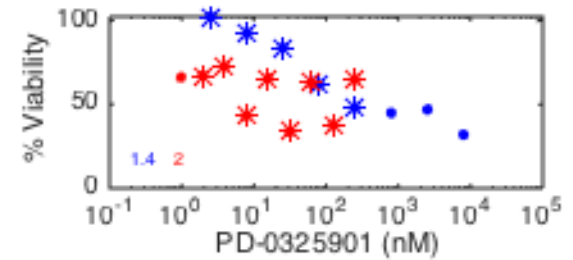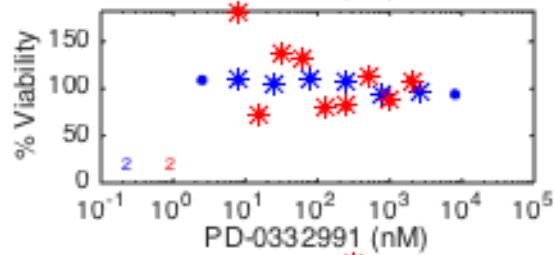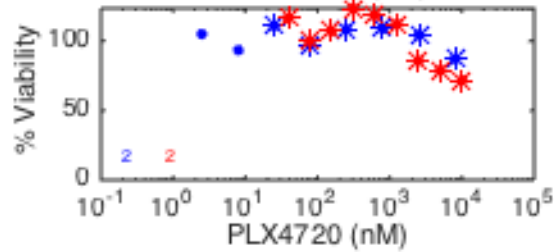

# RERF-LC-MS

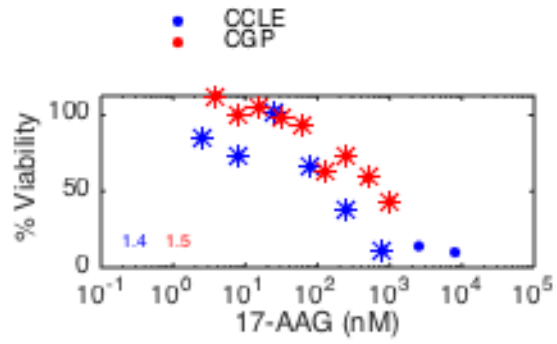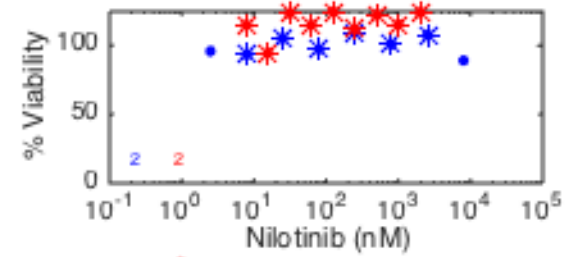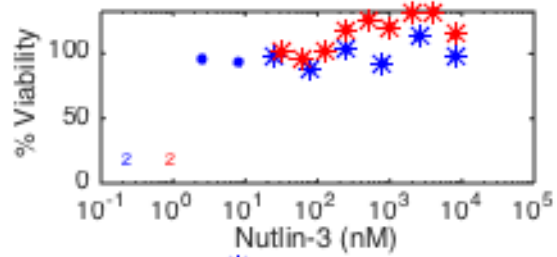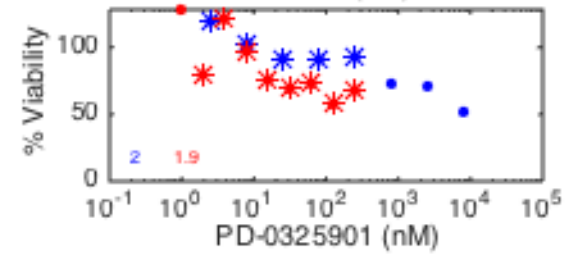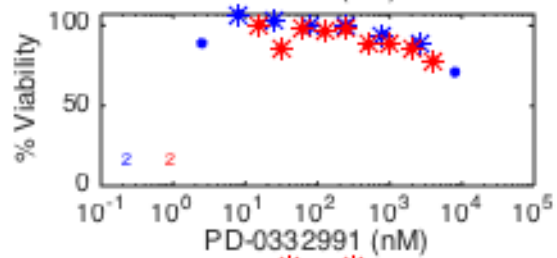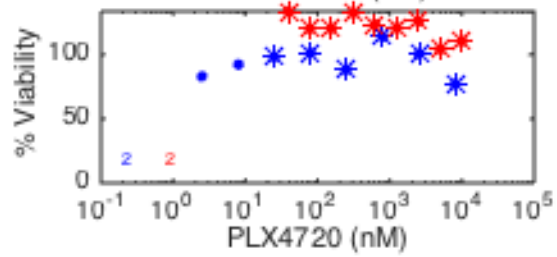

# RKO

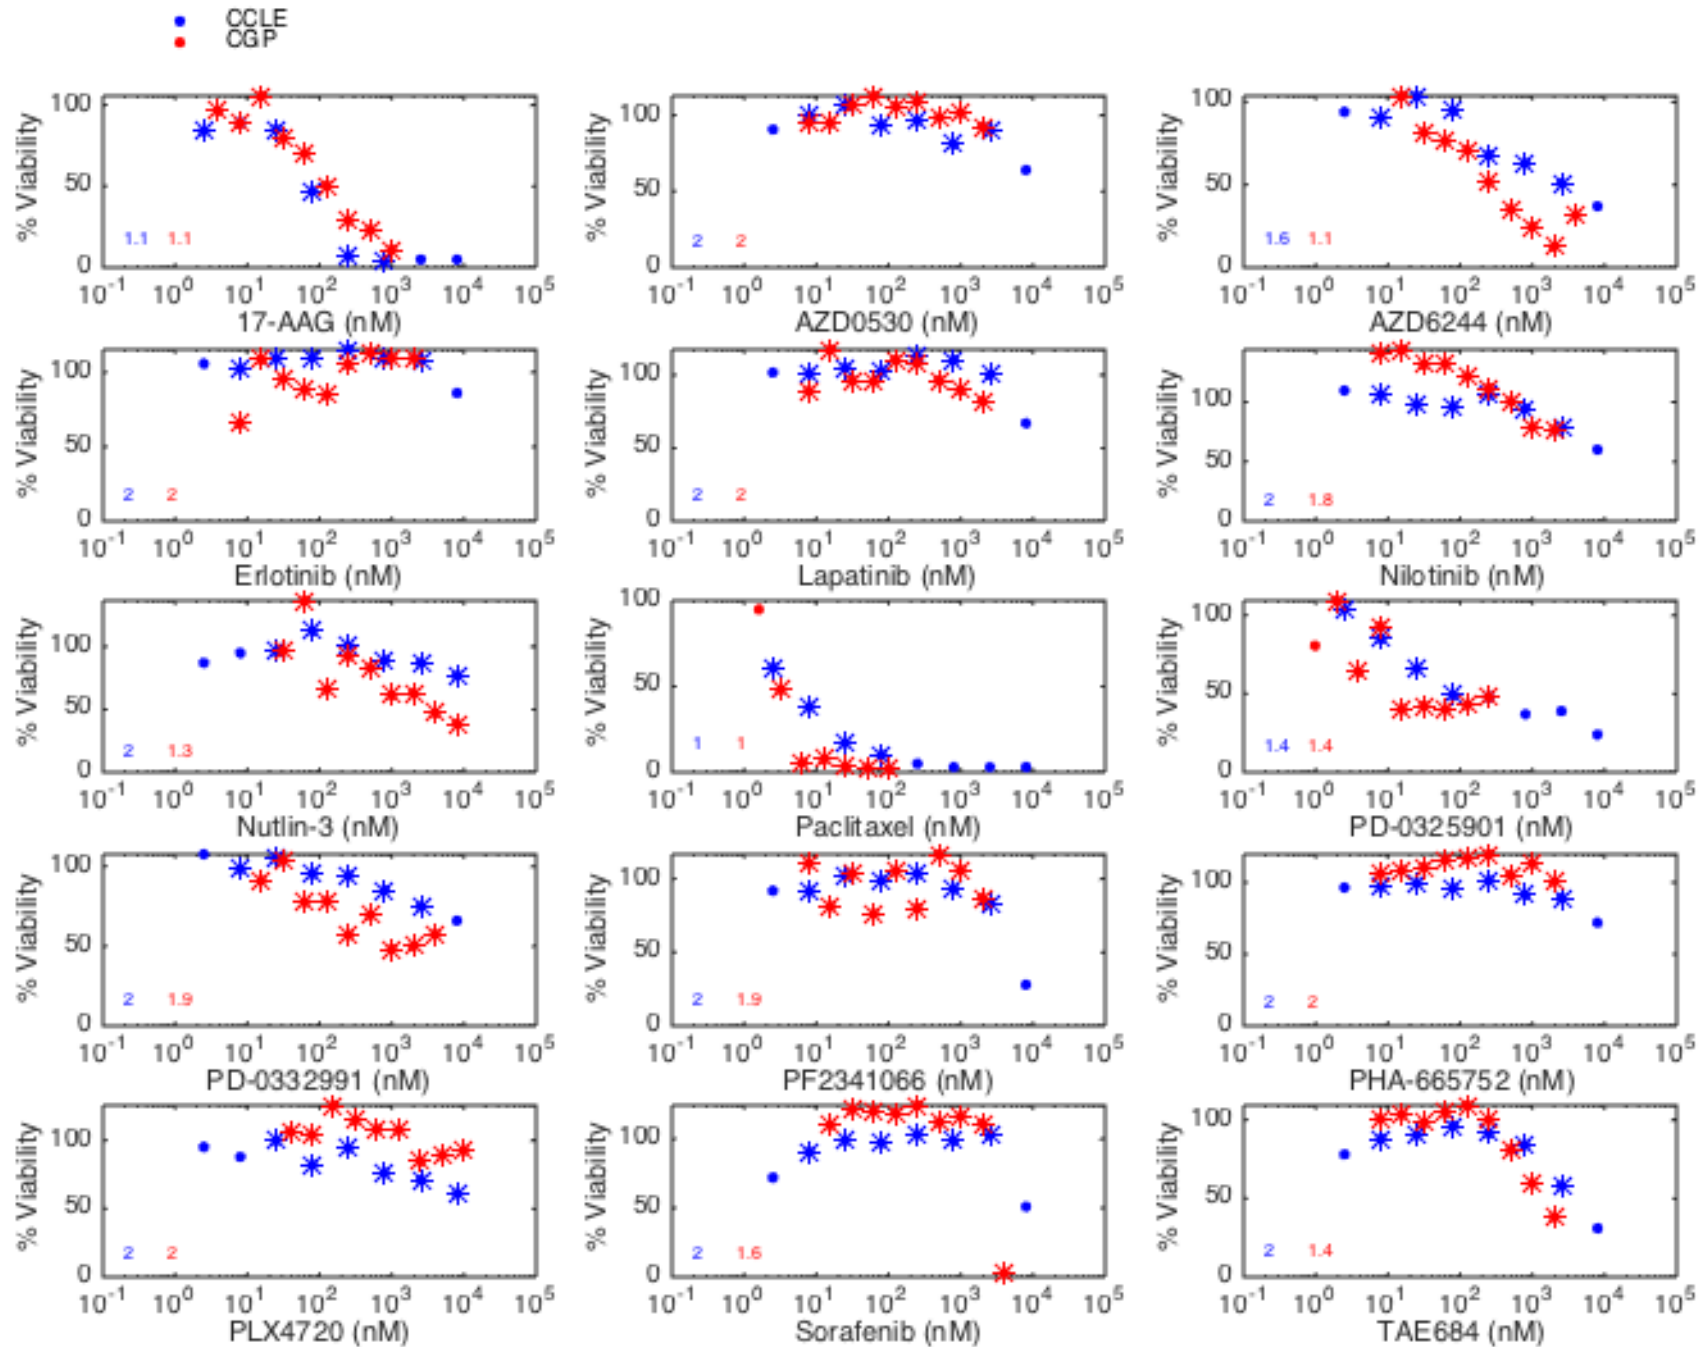

# RL95-2

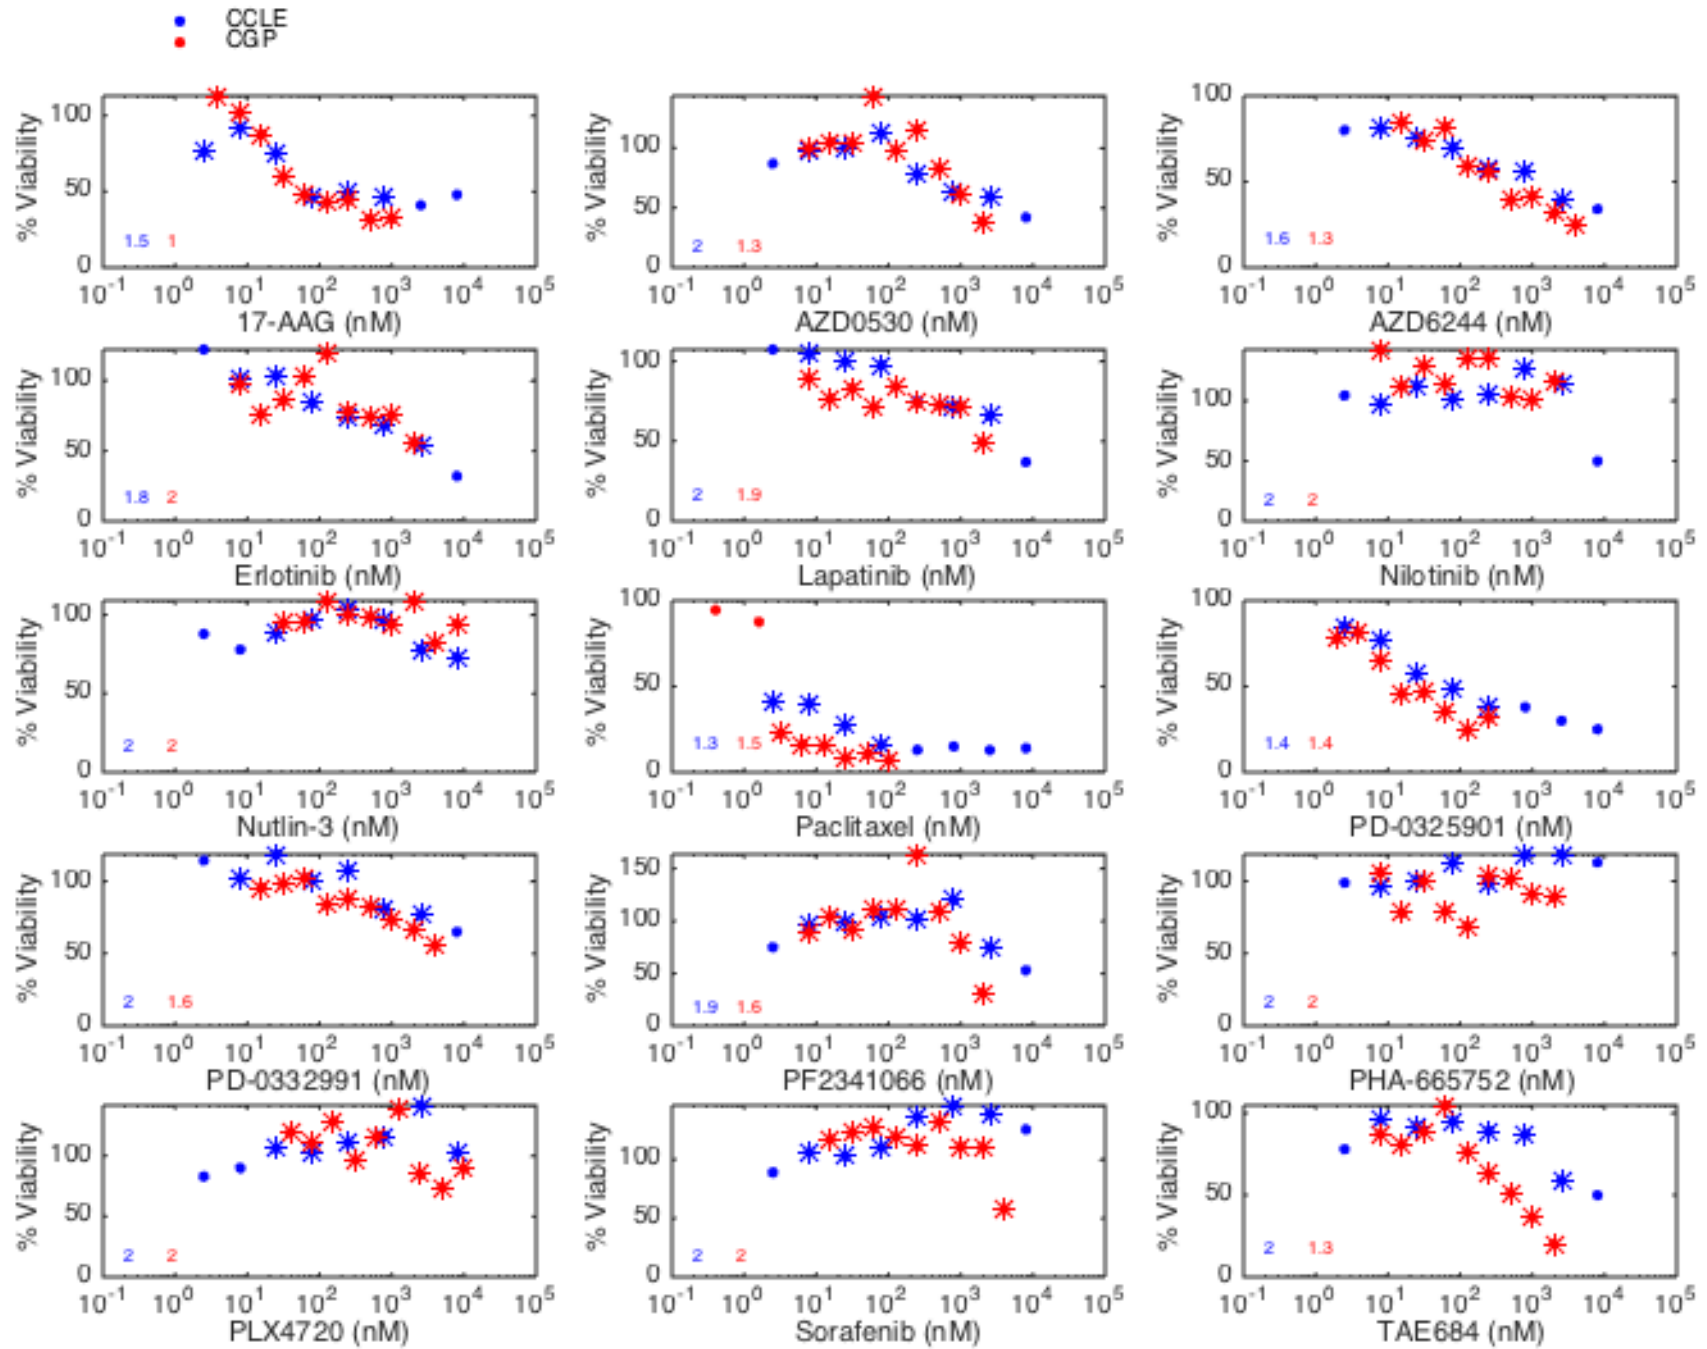

# RPMI-7951

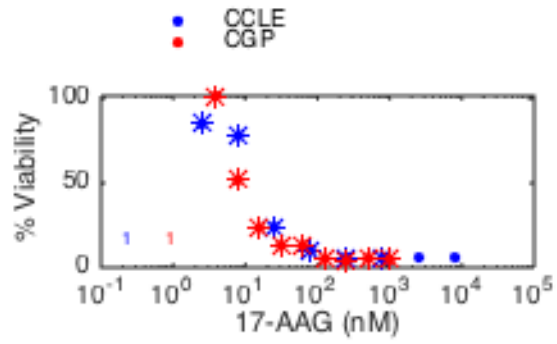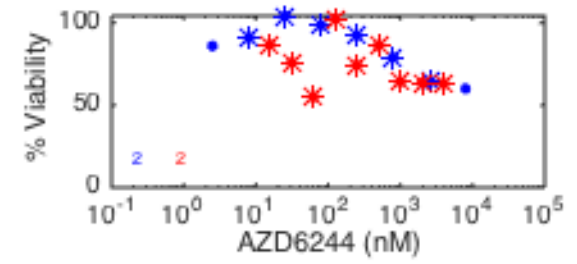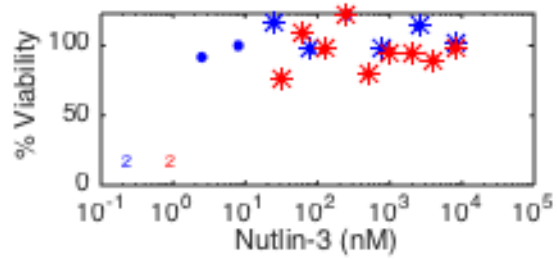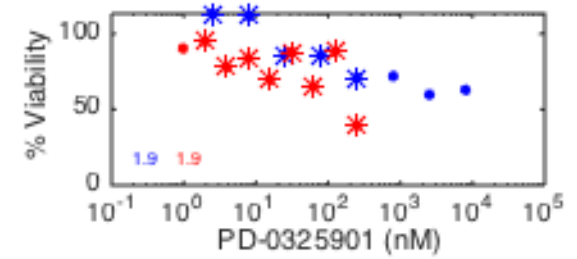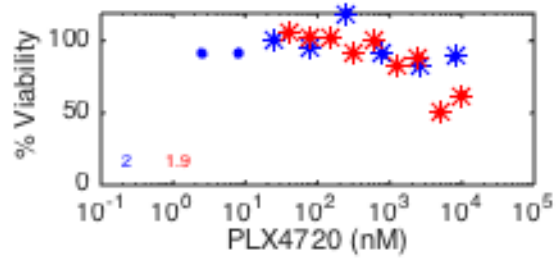



# RPMI-8402

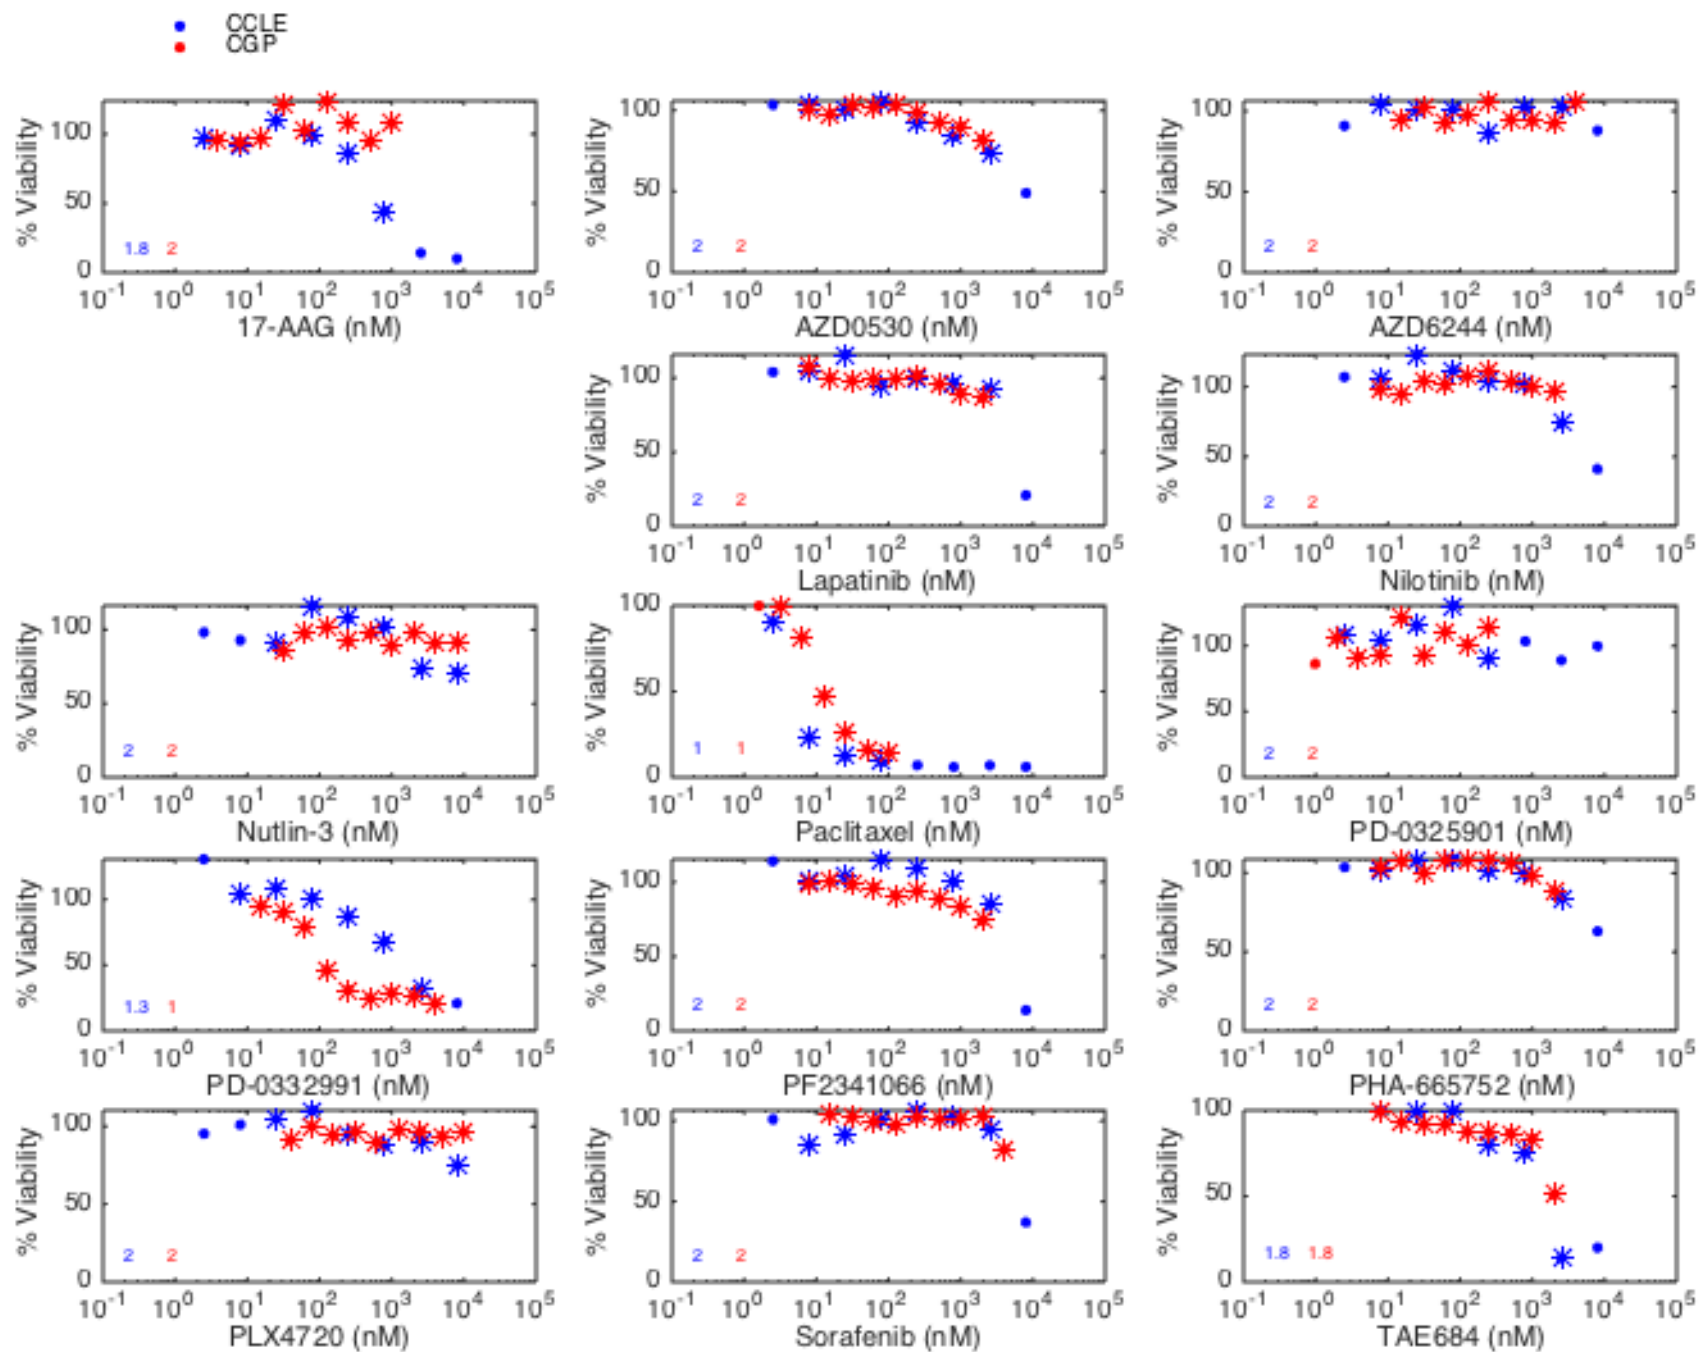

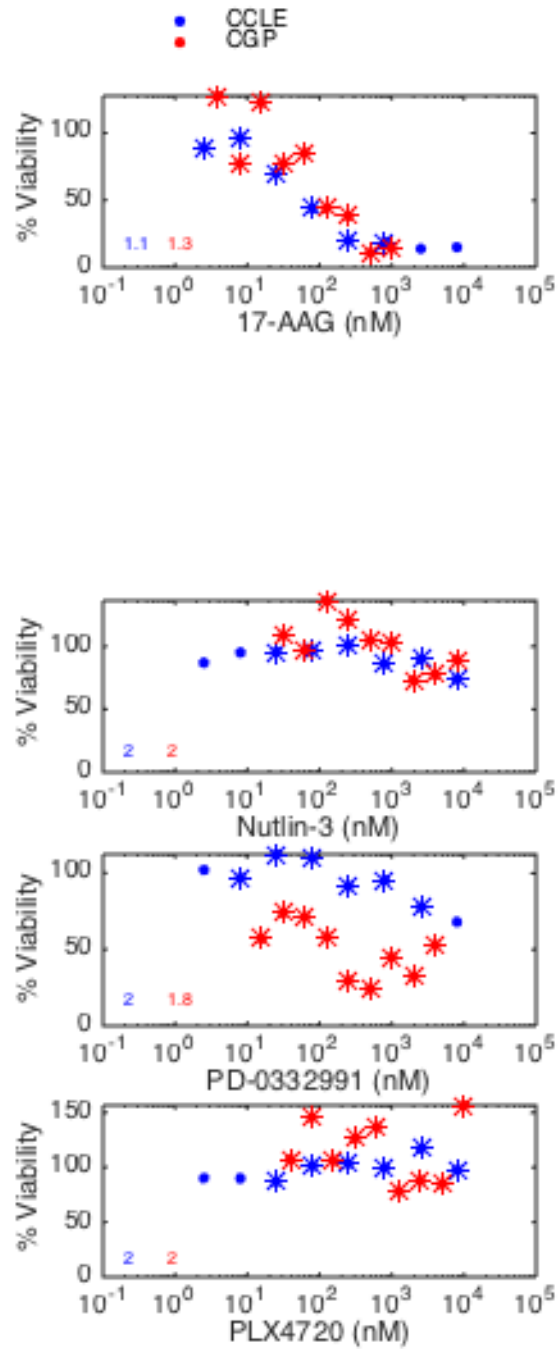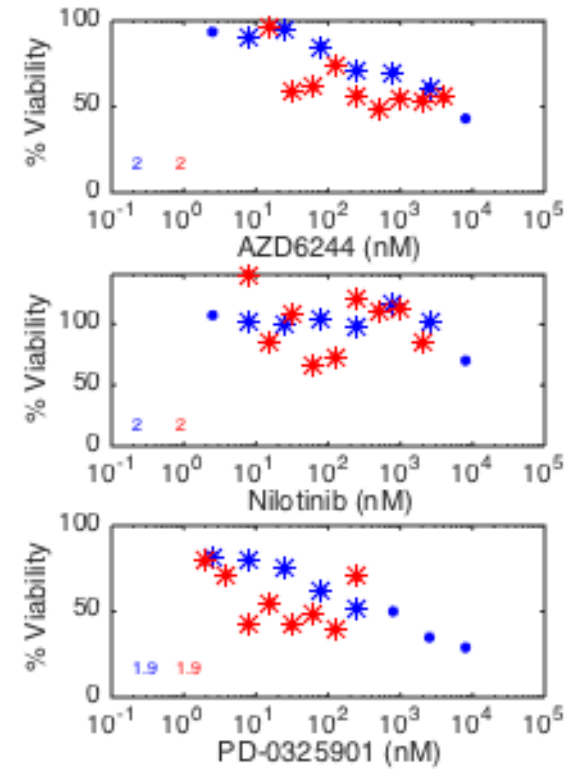

RT4

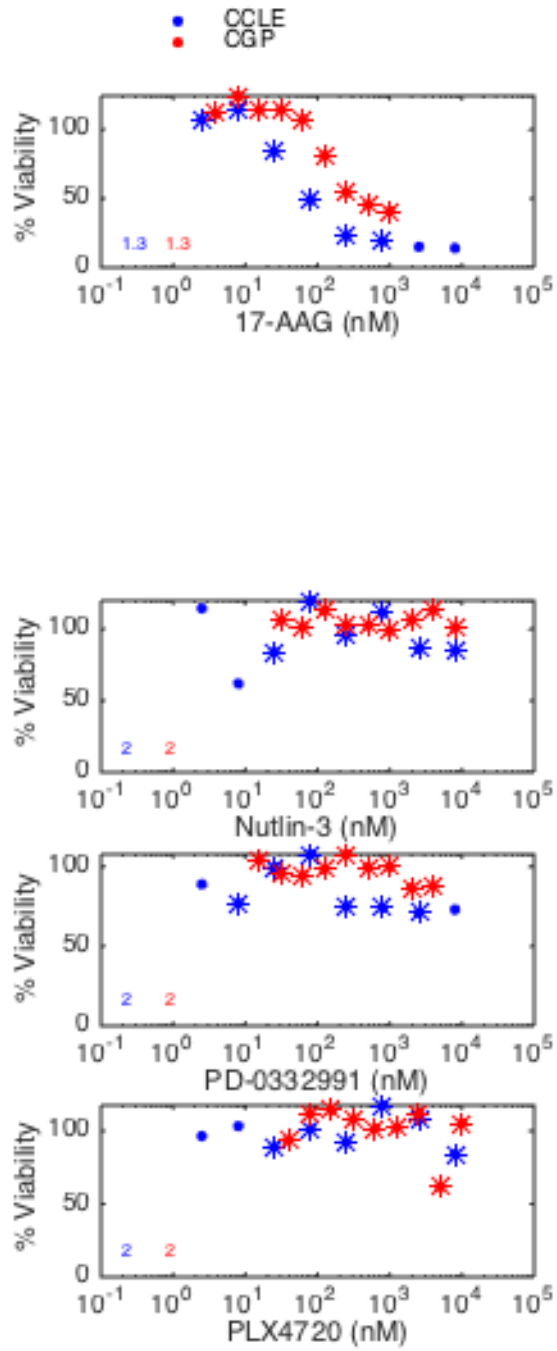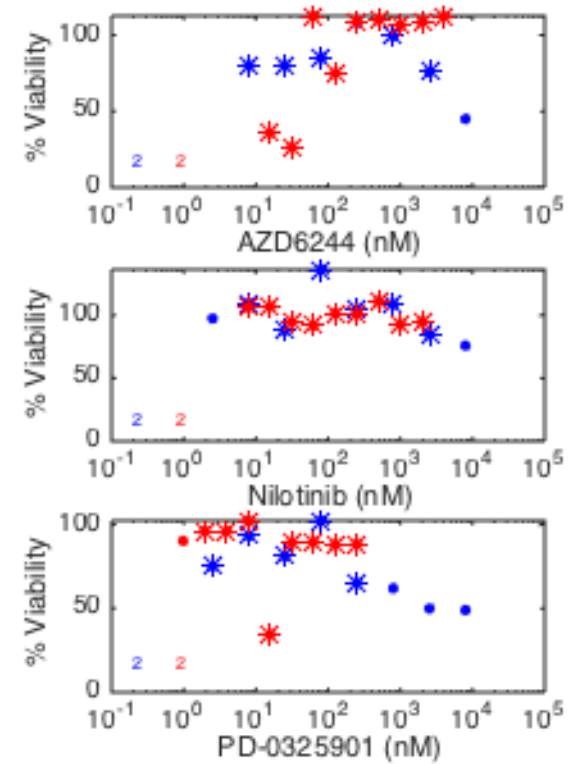

# RVH-421

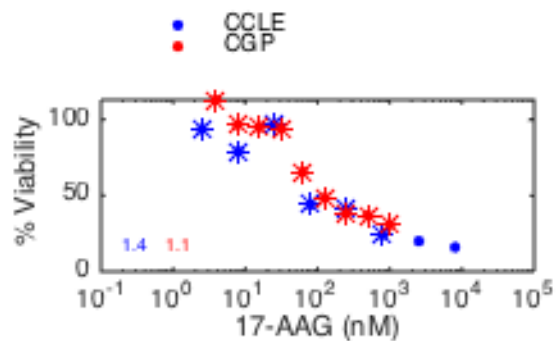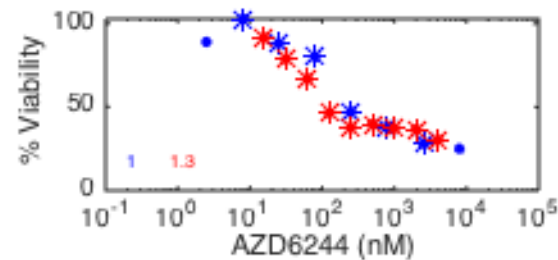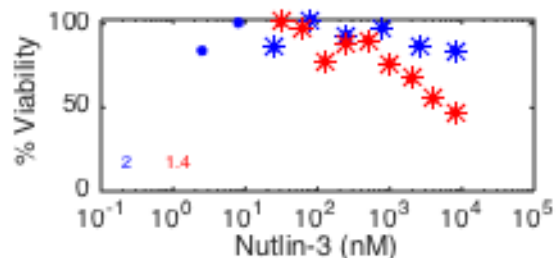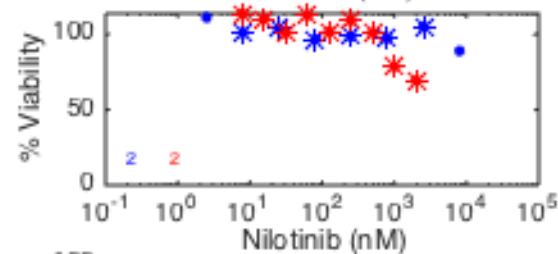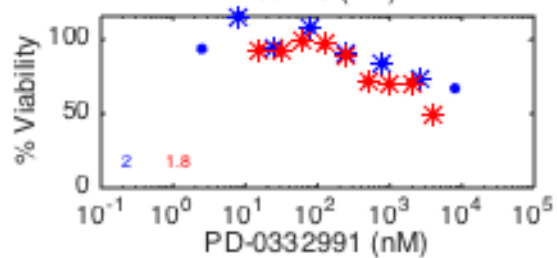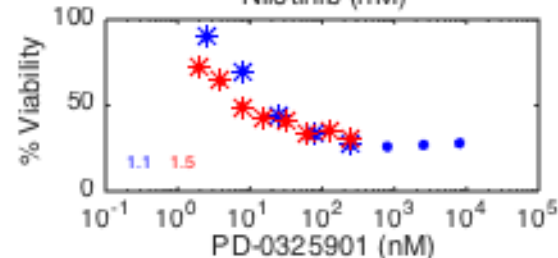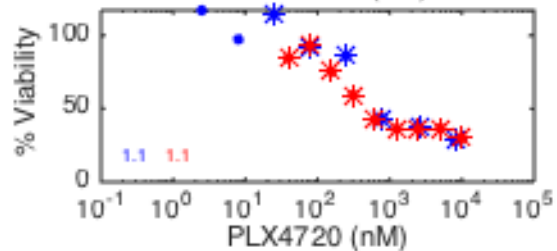

## Saos-2

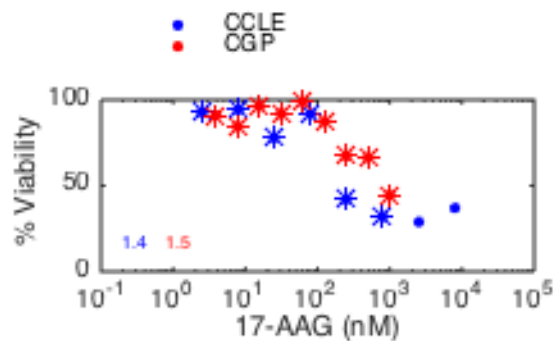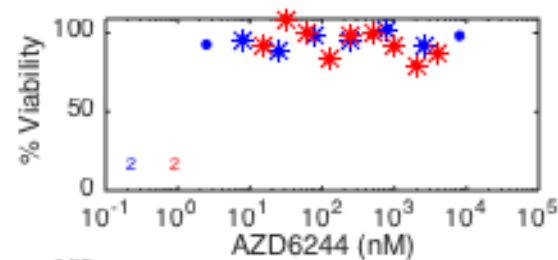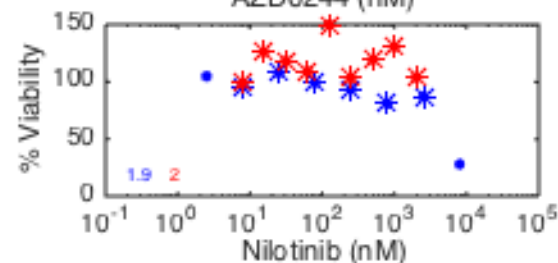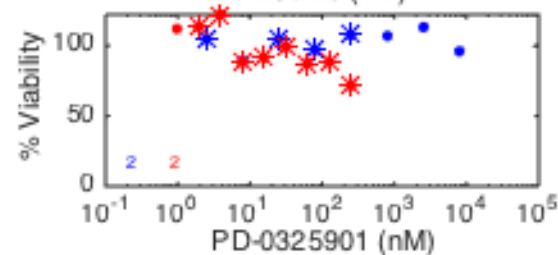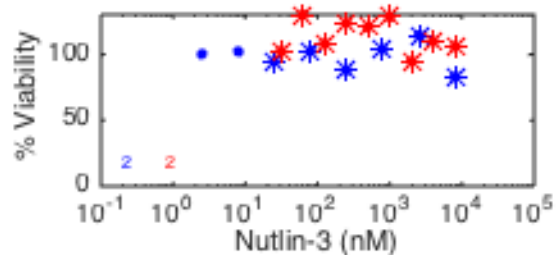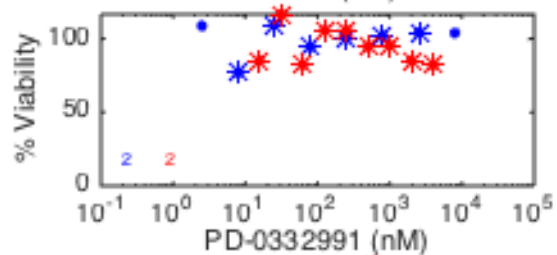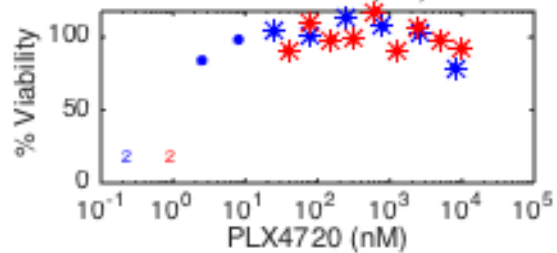

SBC-5

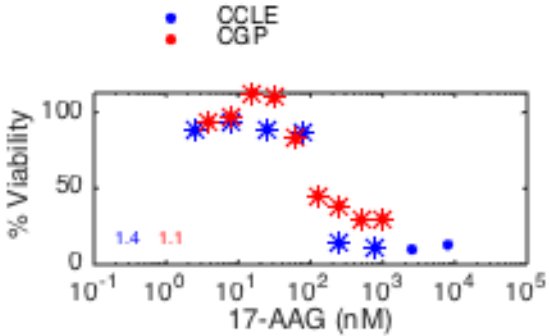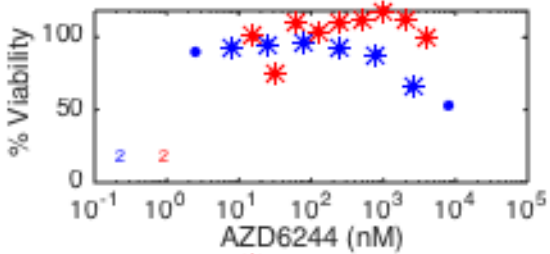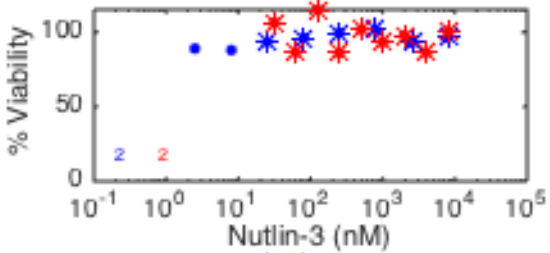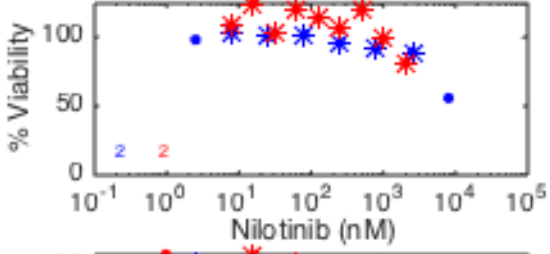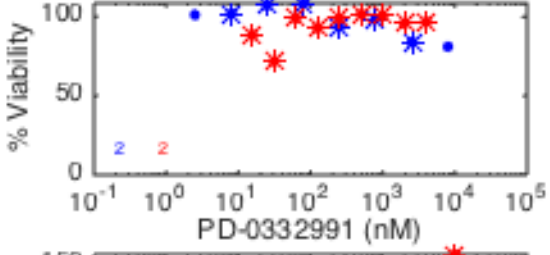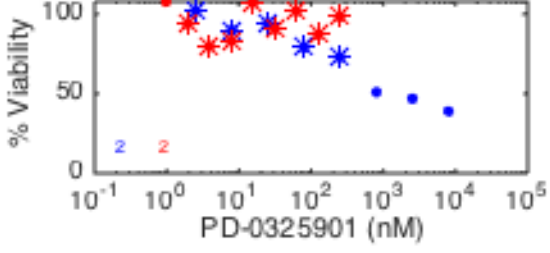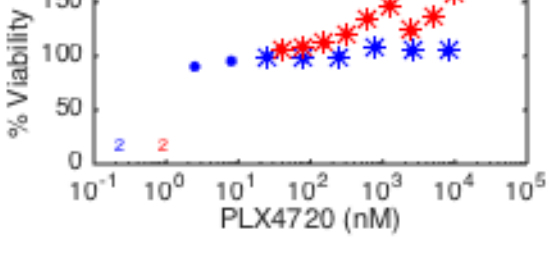

# SCC-9

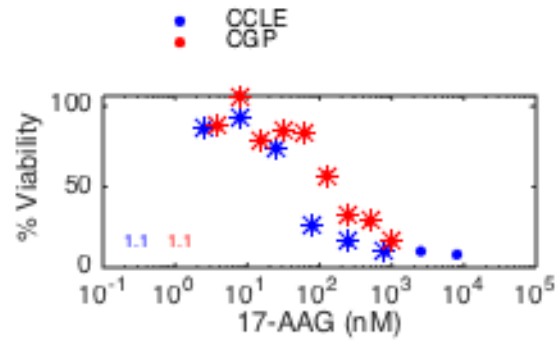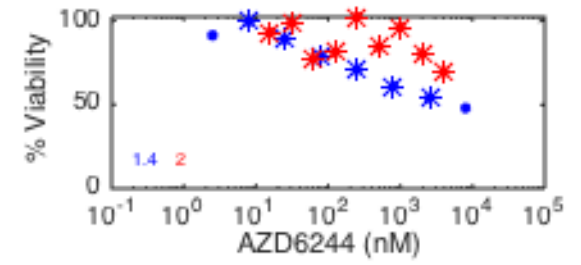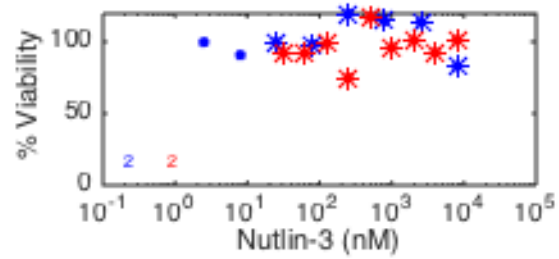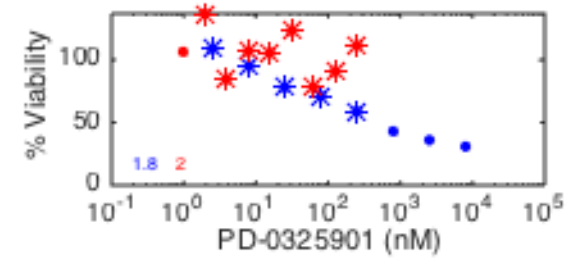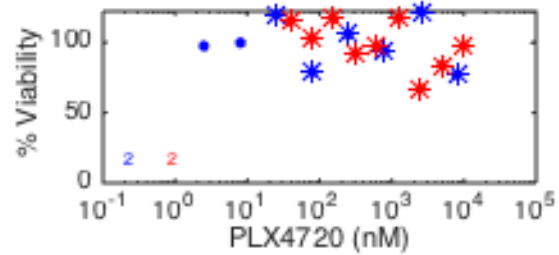

SCC-25

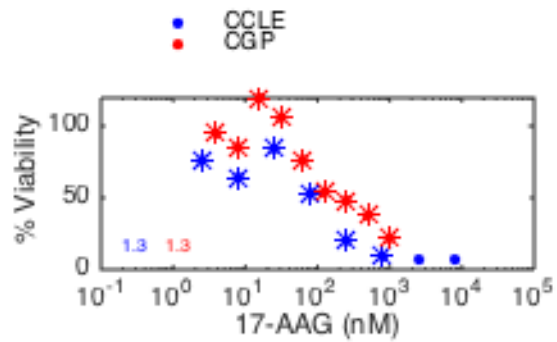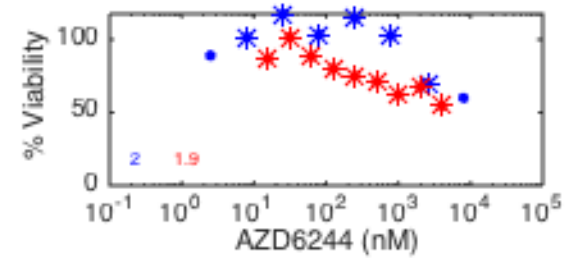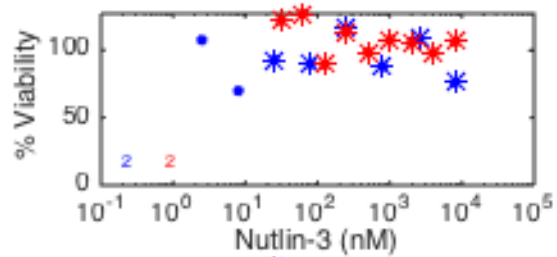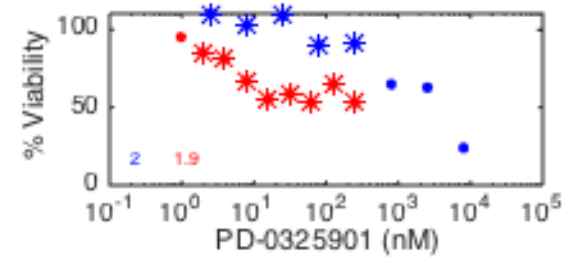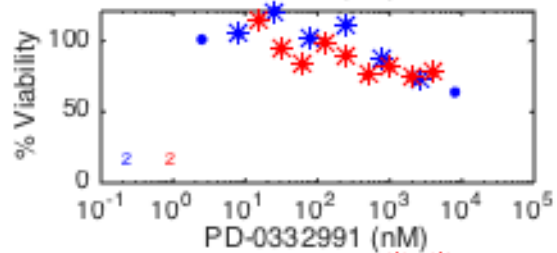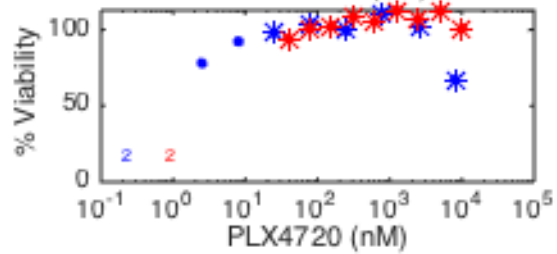



# SF126

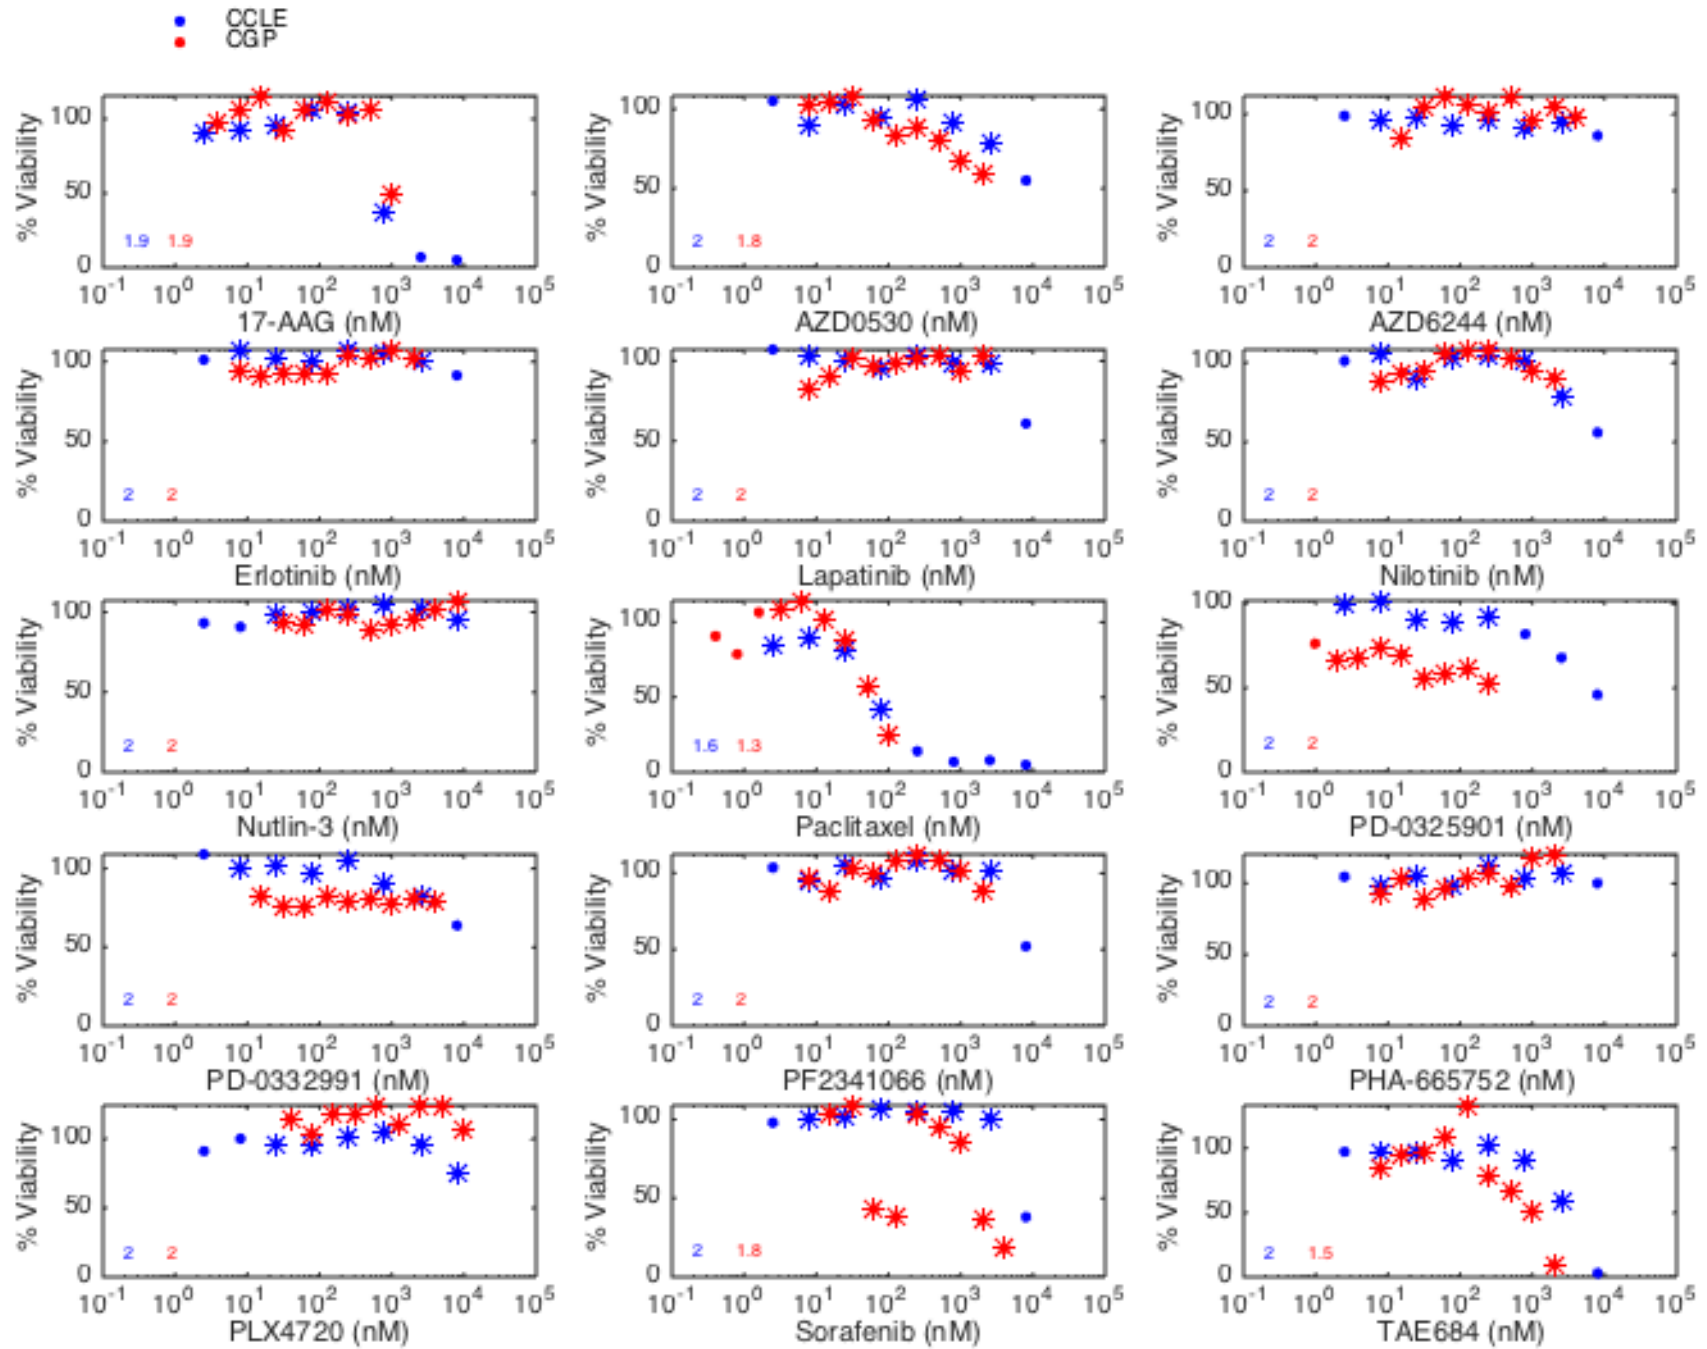

SF295

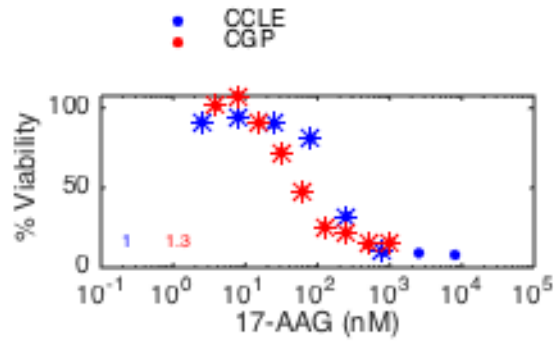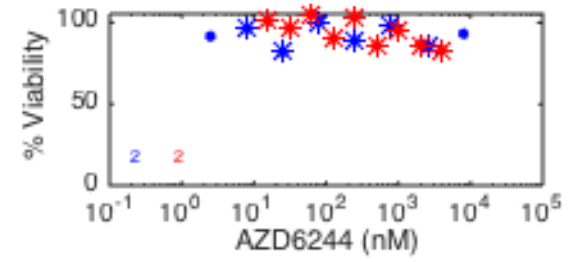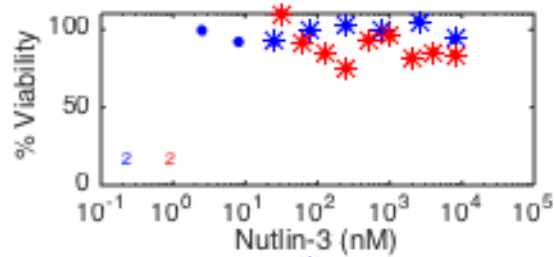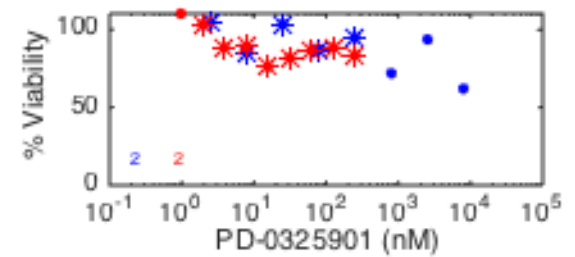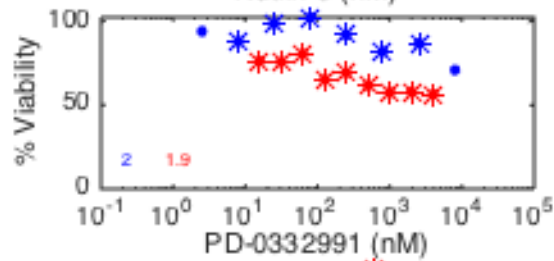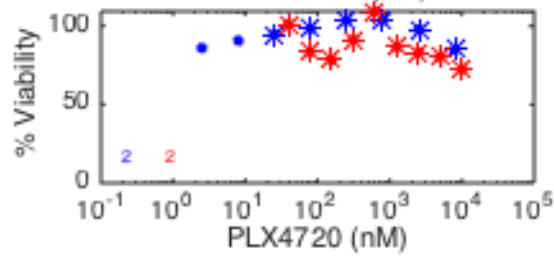

# SIG-M5

● CCLE  
● CGP

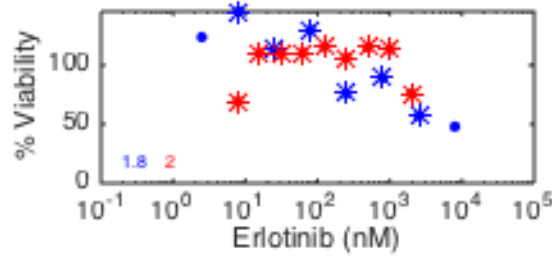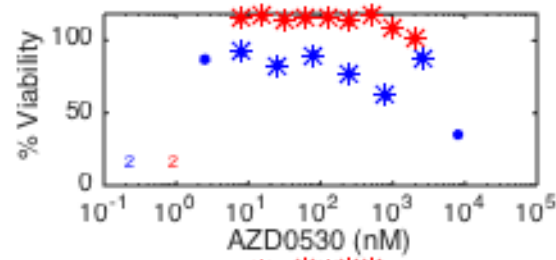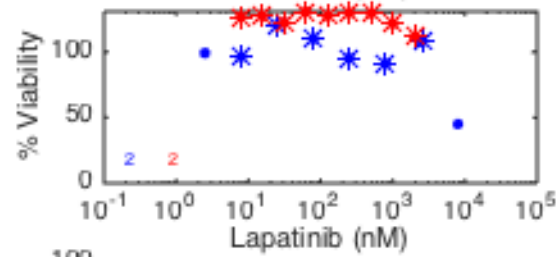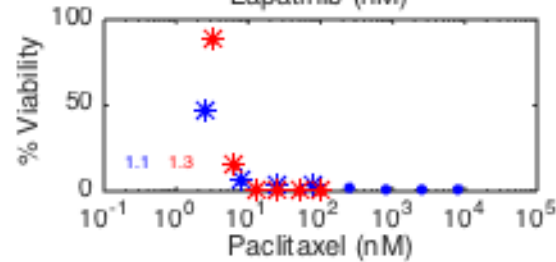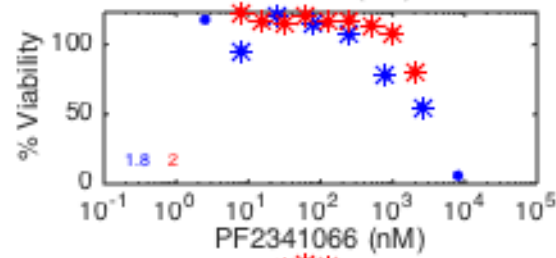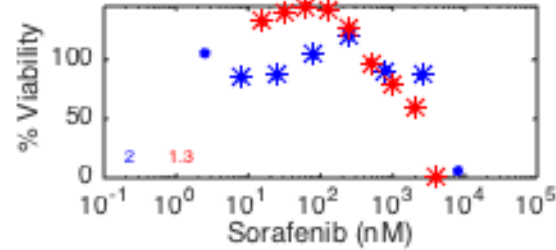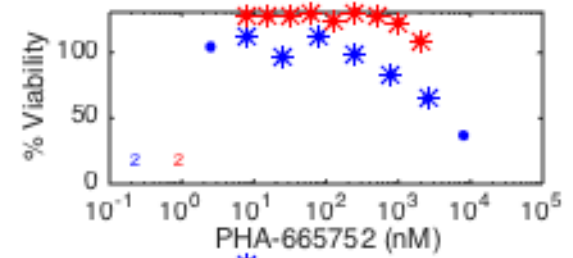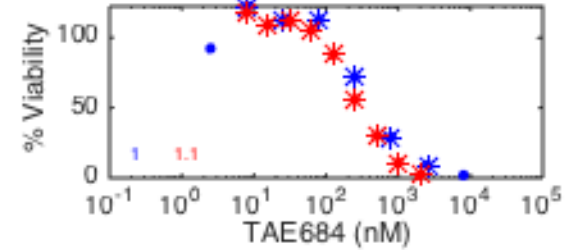



SJRH30

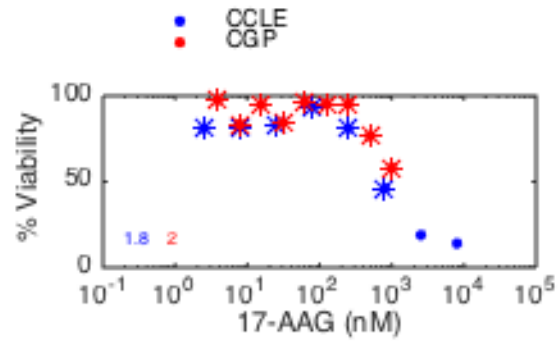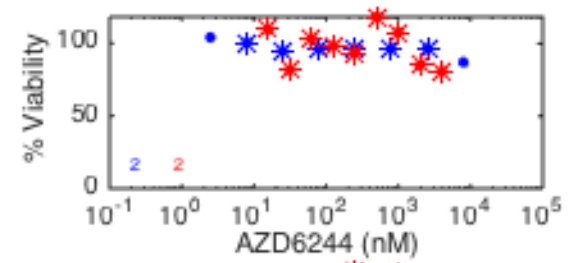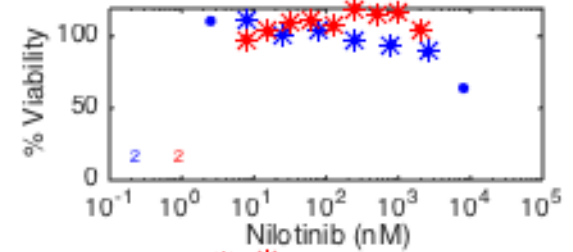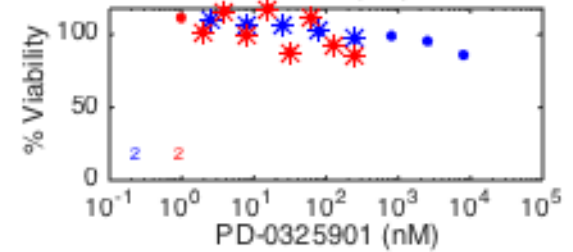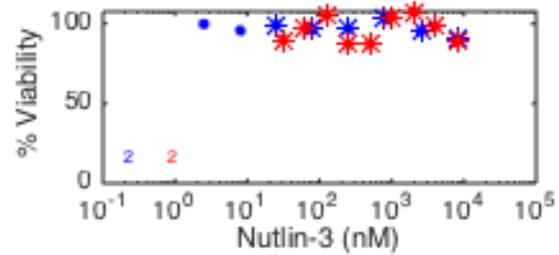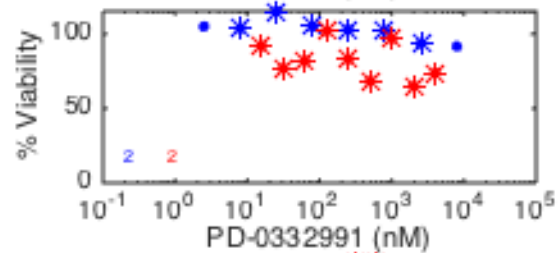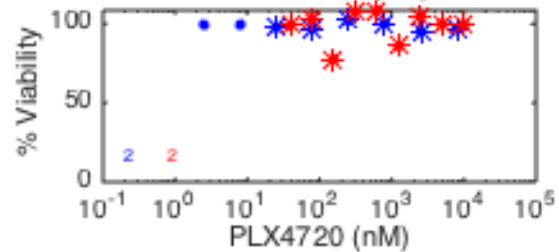

# SJSA-1

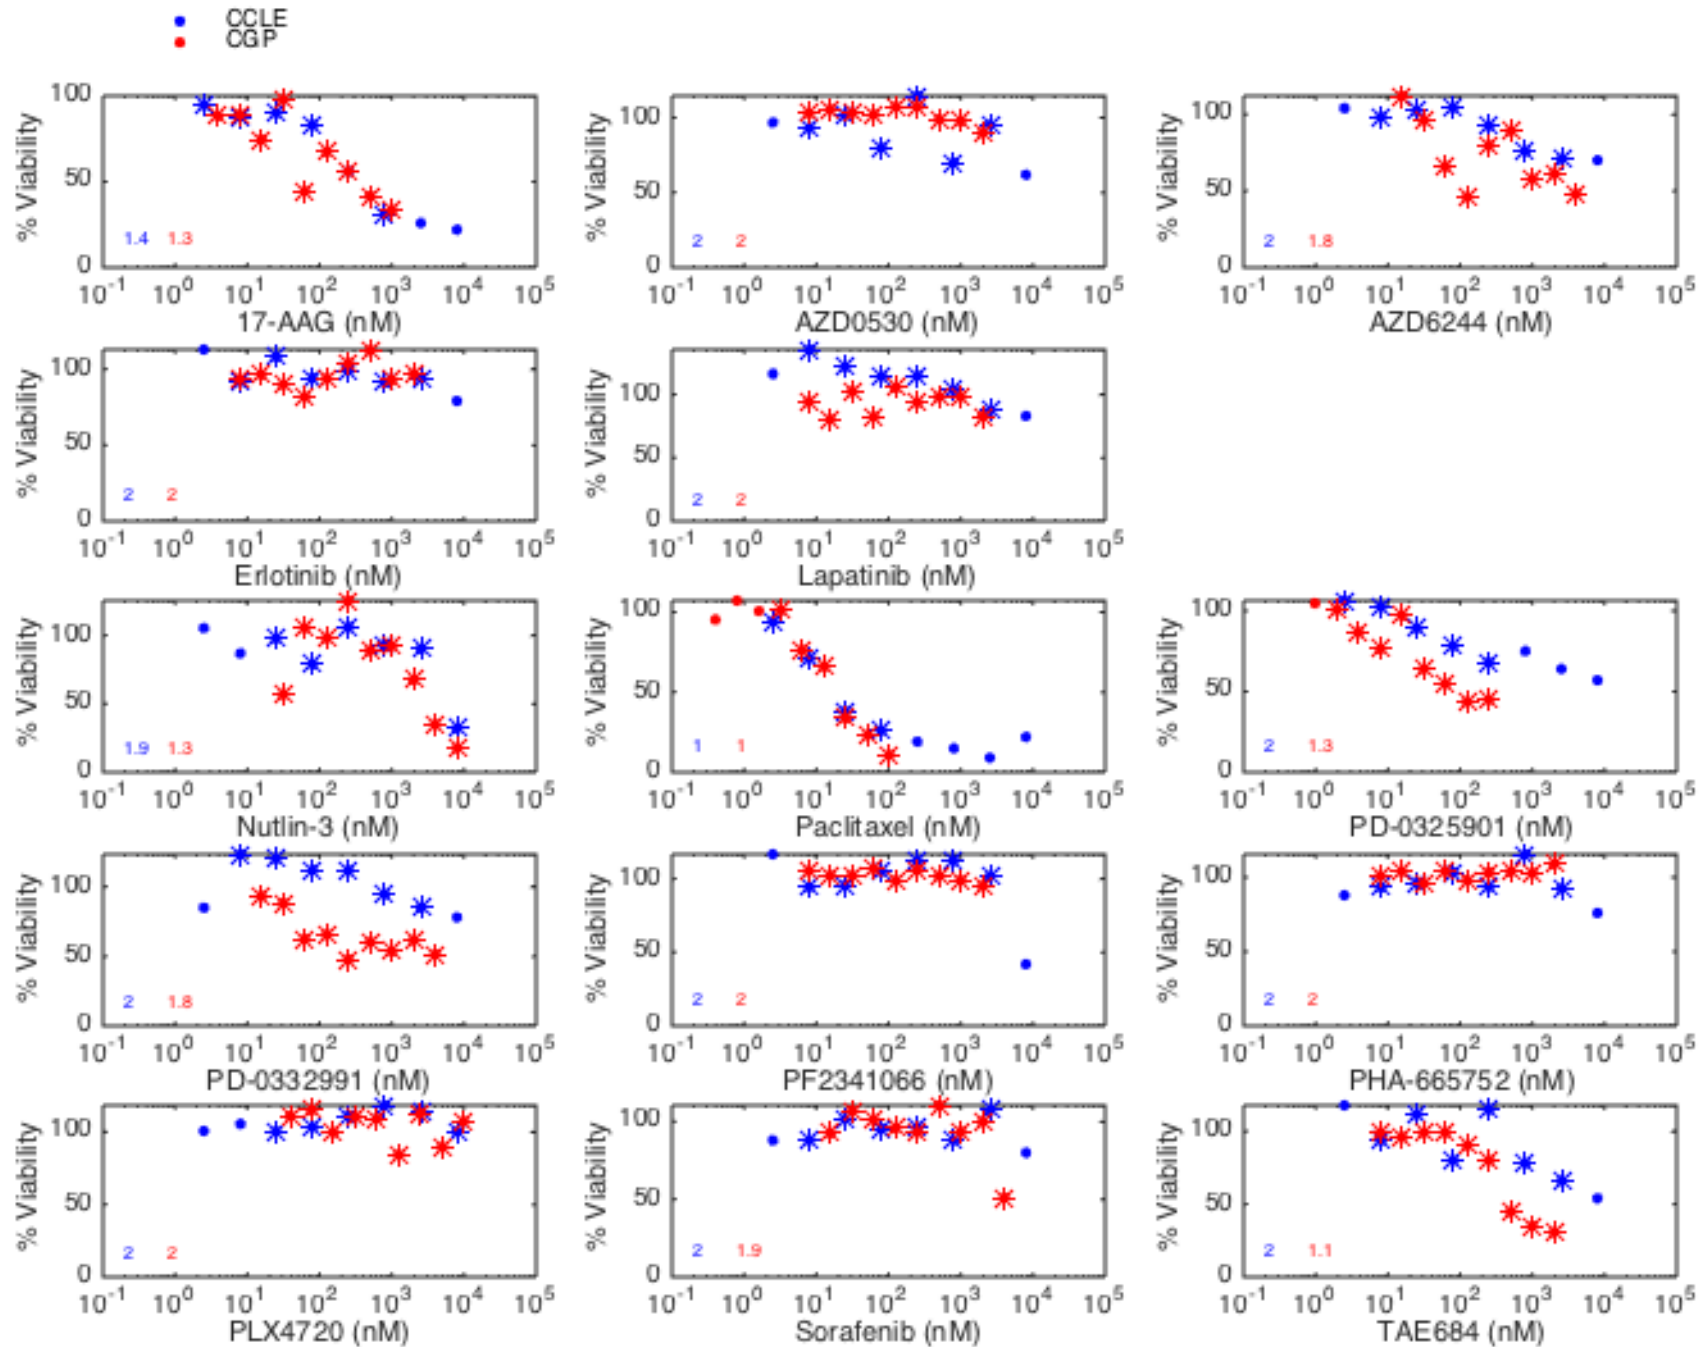

# SK-CO-1

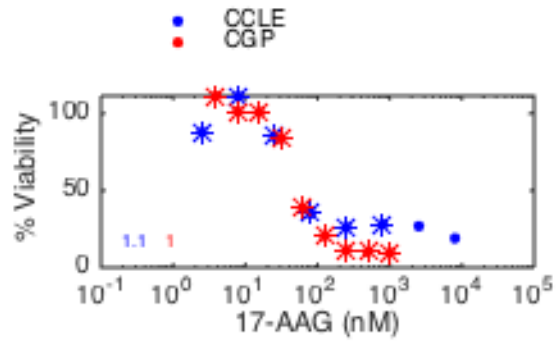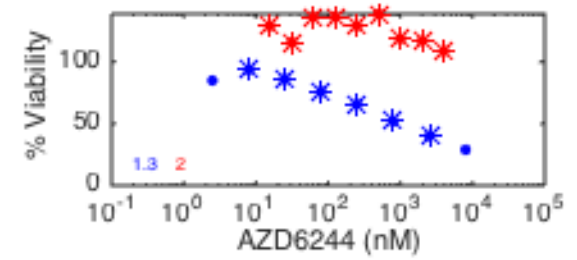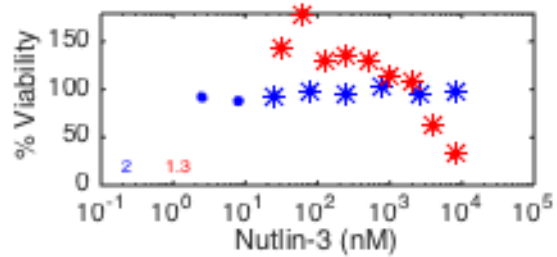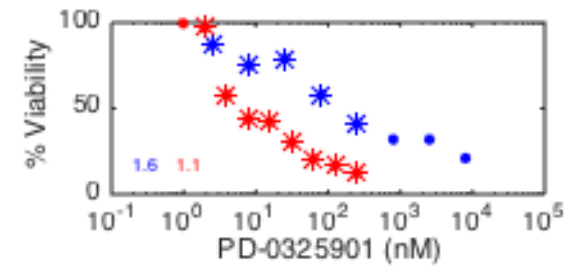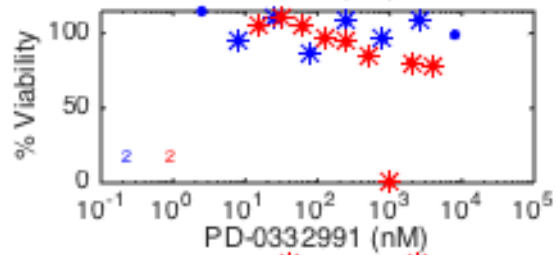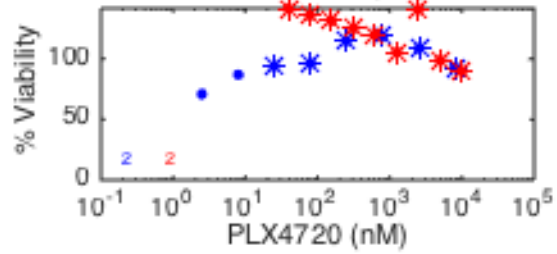

# SK-HEP-1

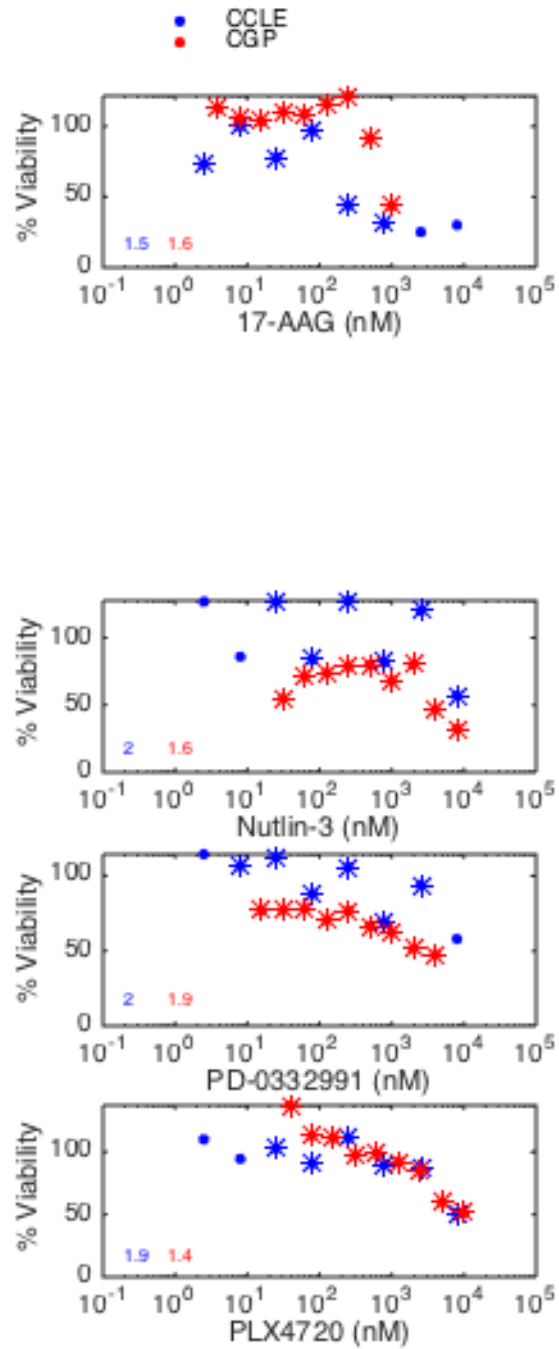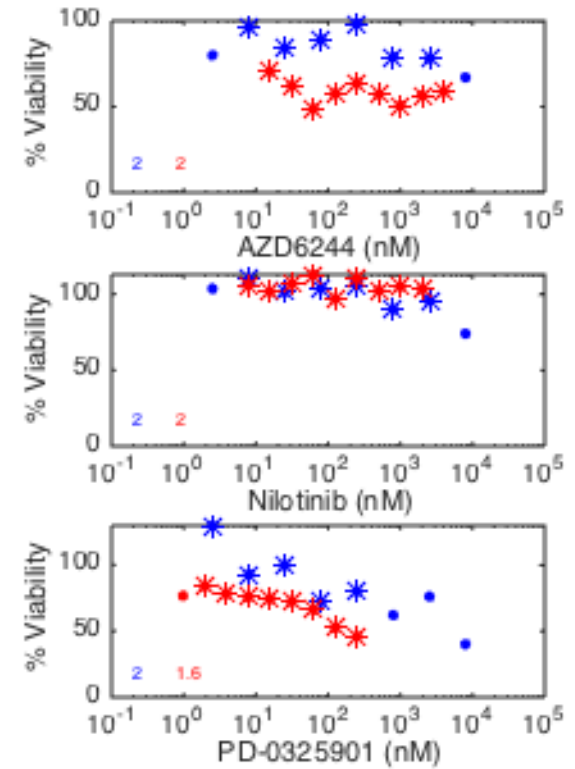



# SK-LMS-1

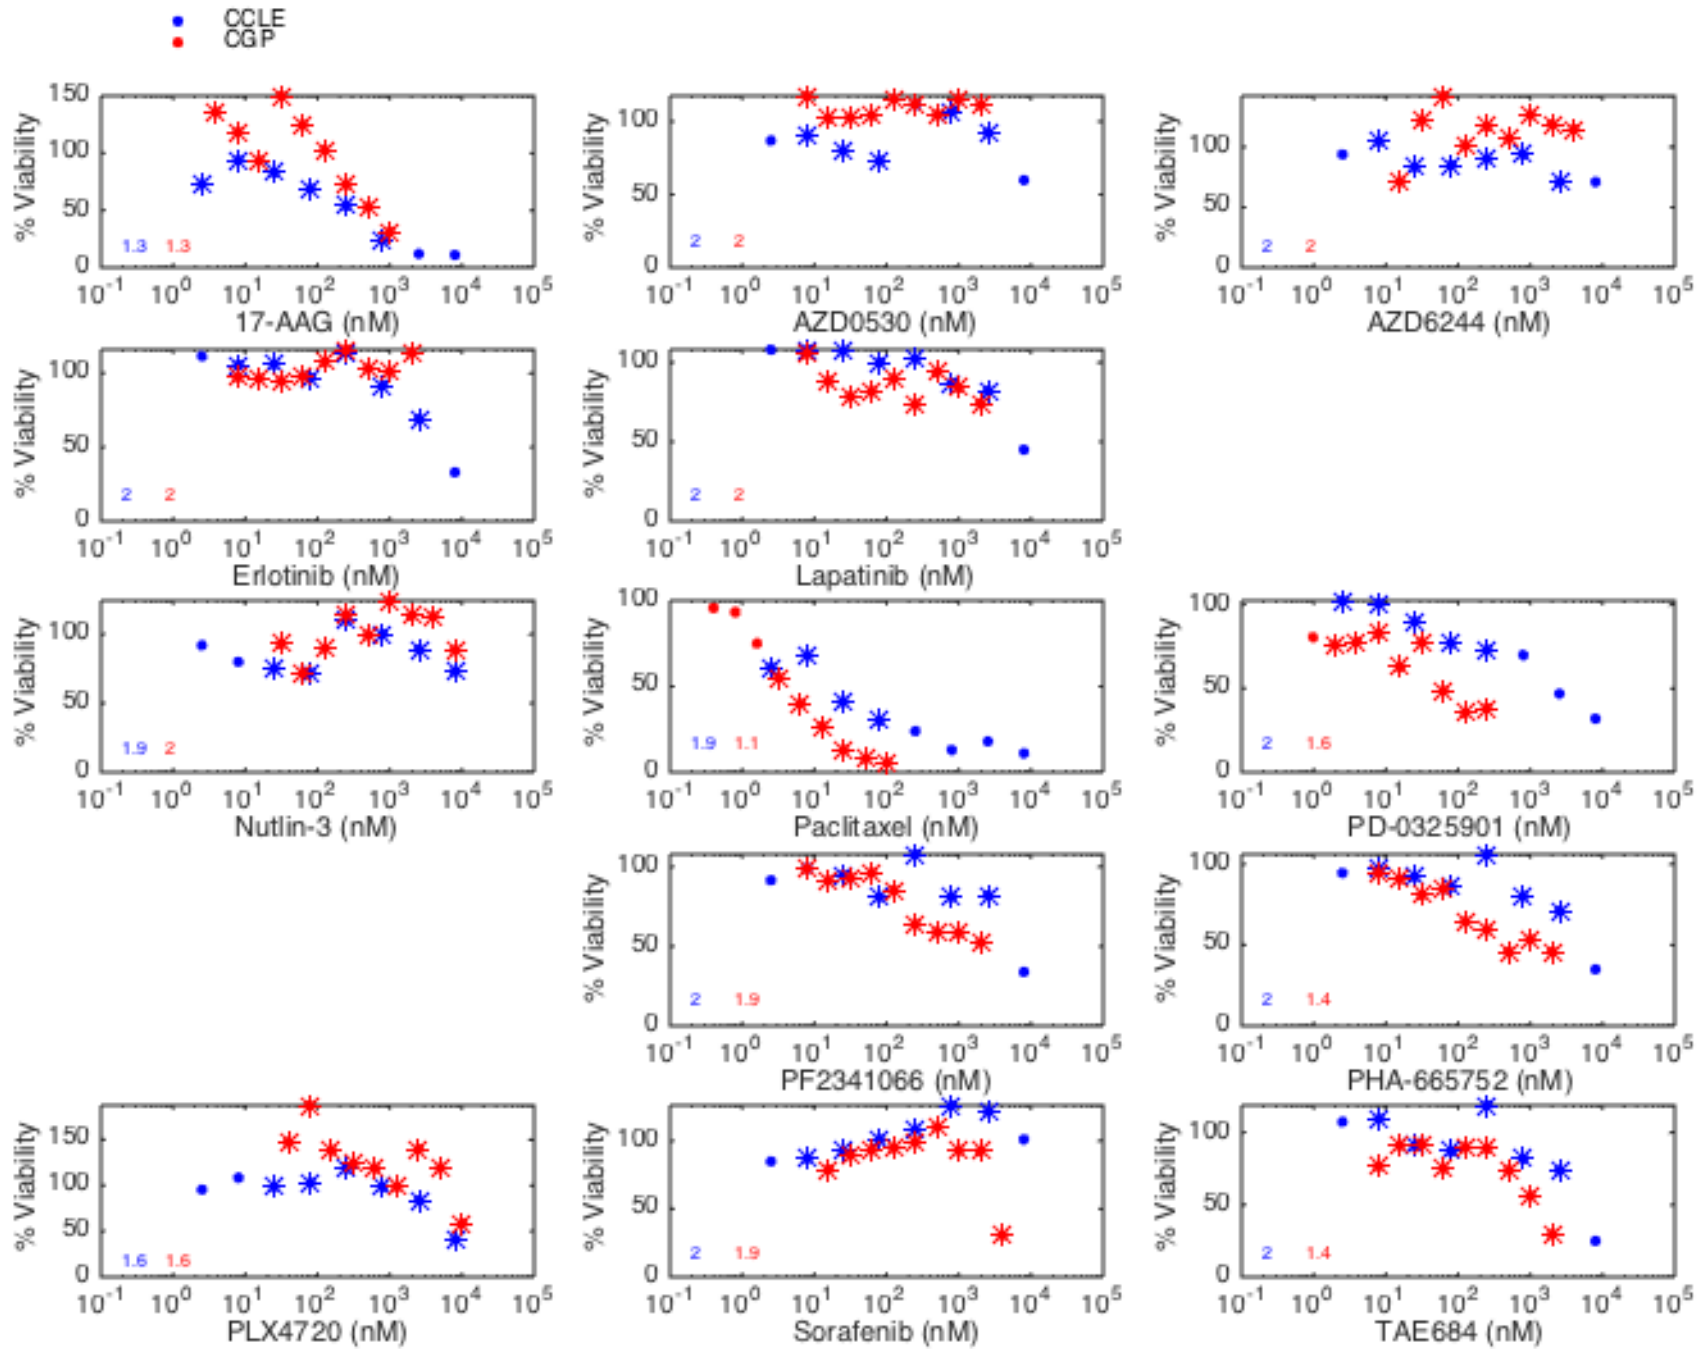

# SK-LU-1

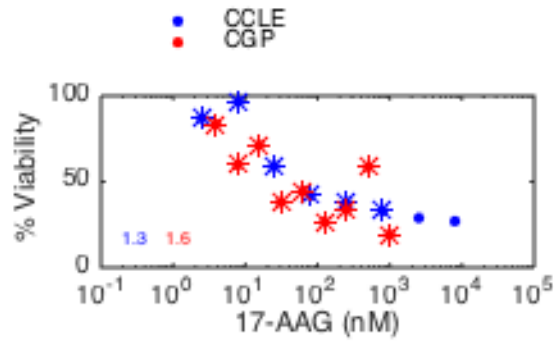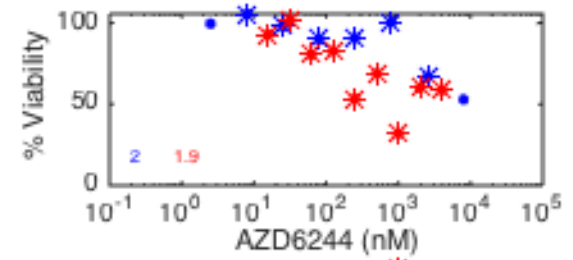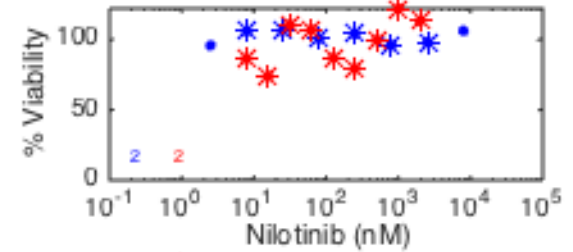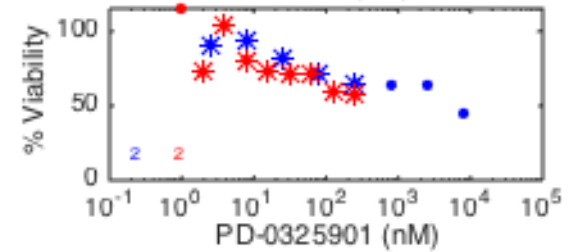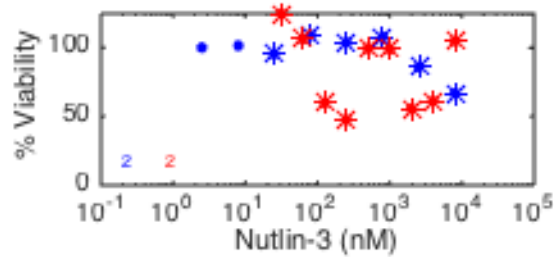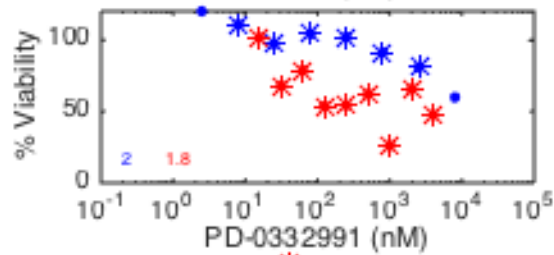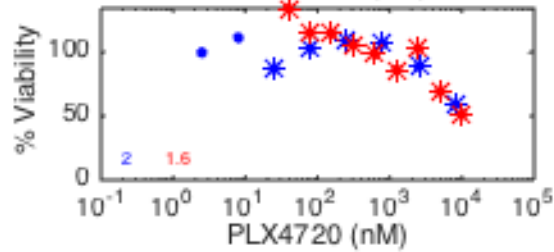

# SK-MEL-2

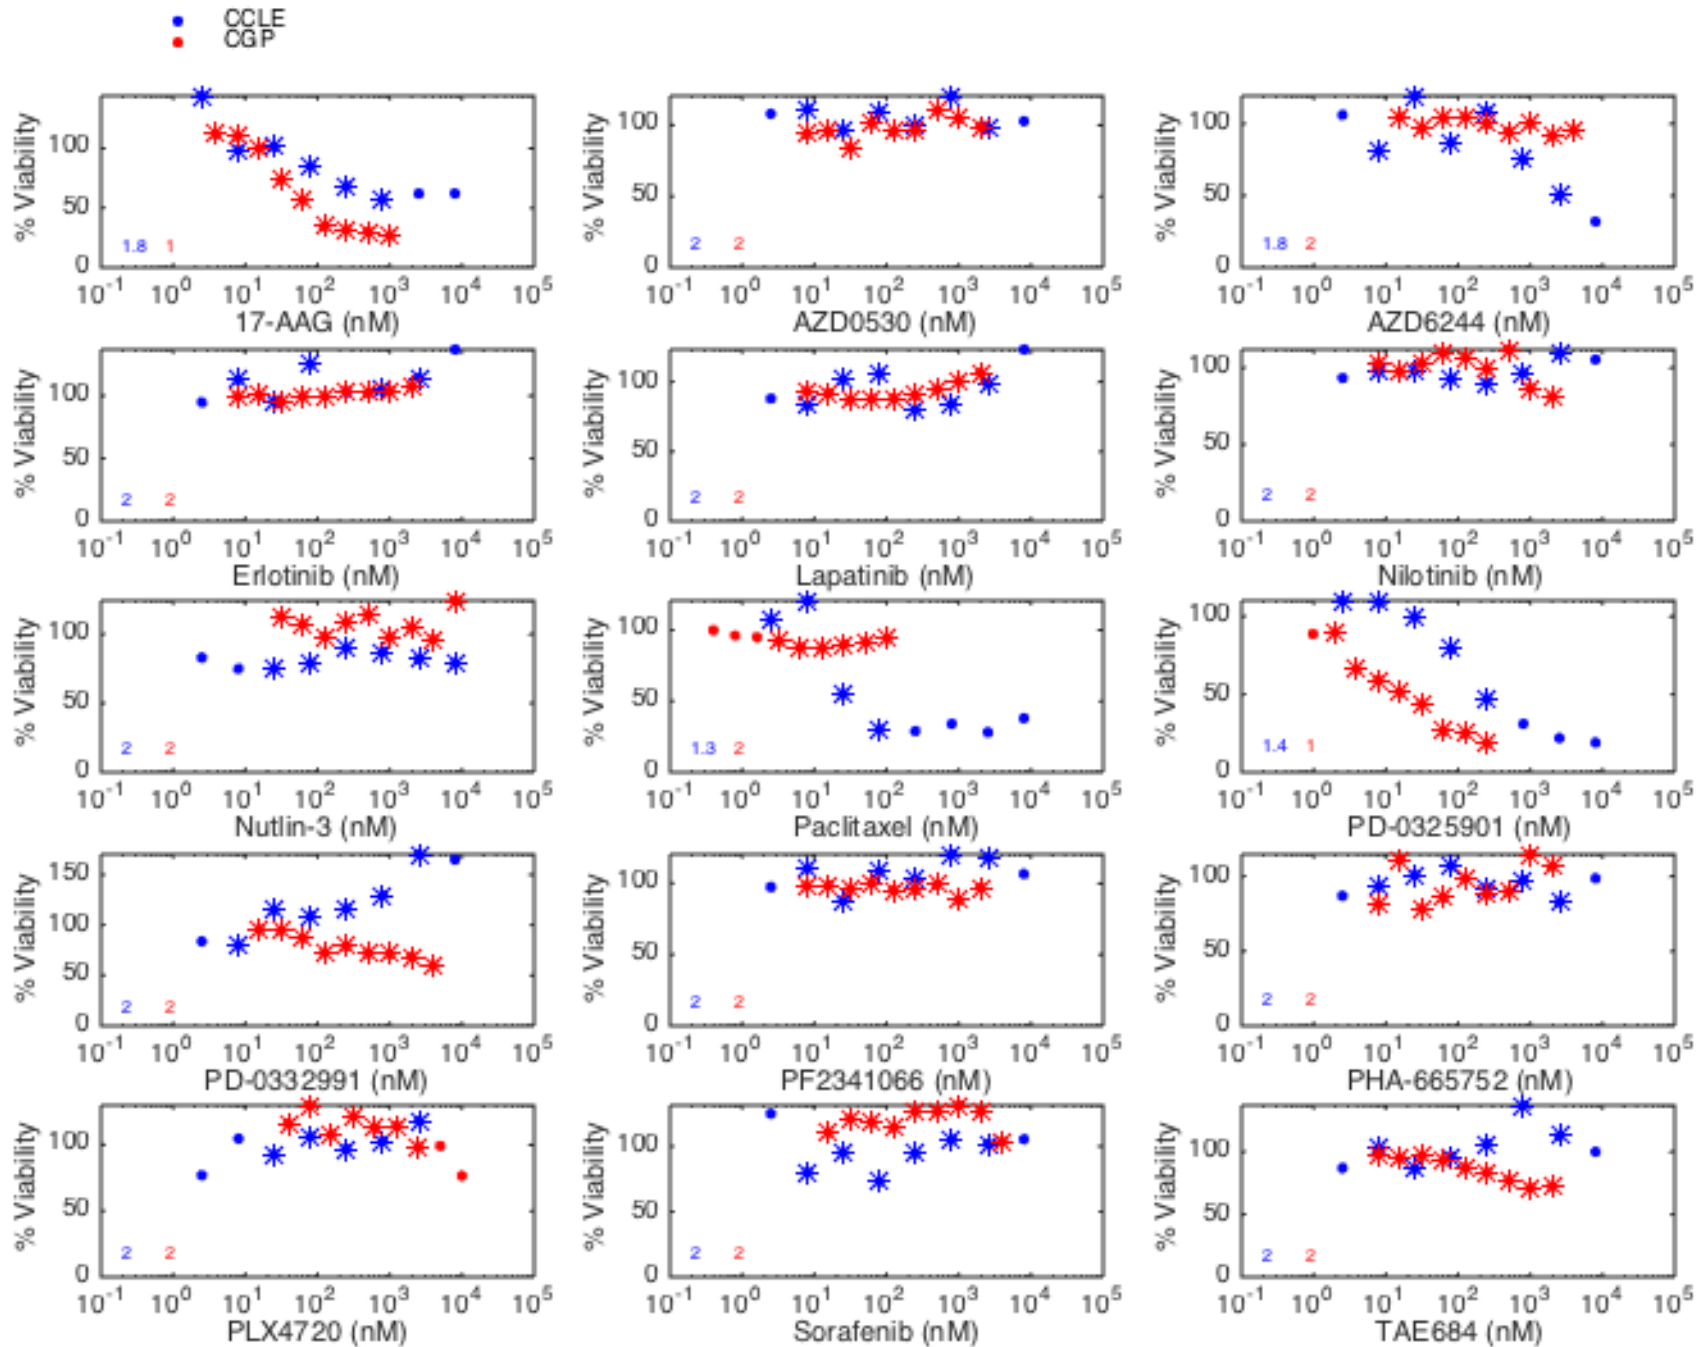

# SK-MEL-5

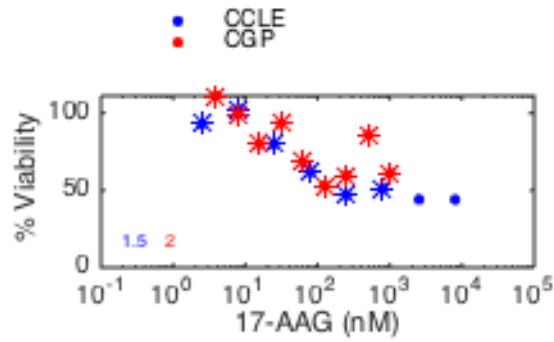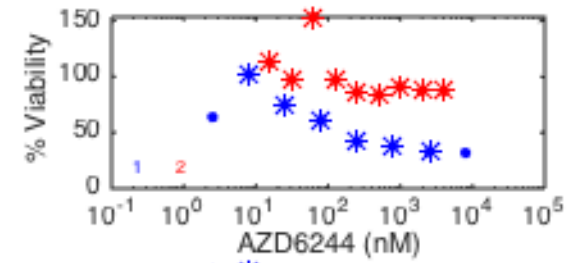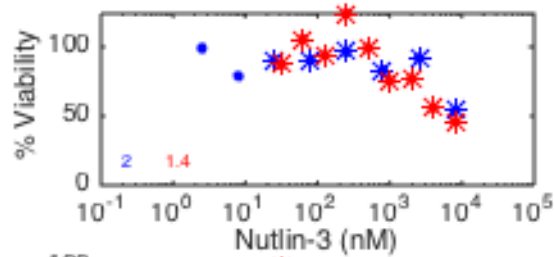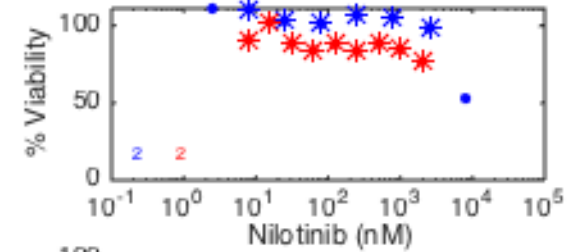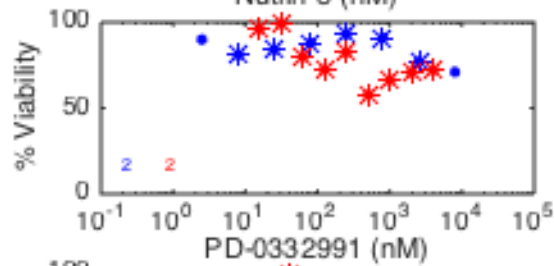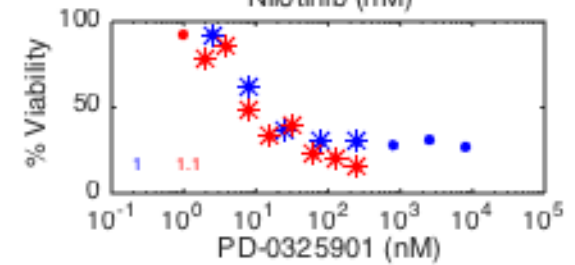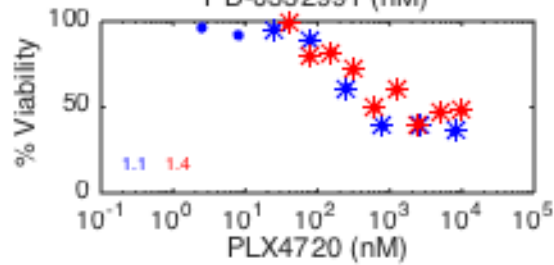

# SK-MEL-24

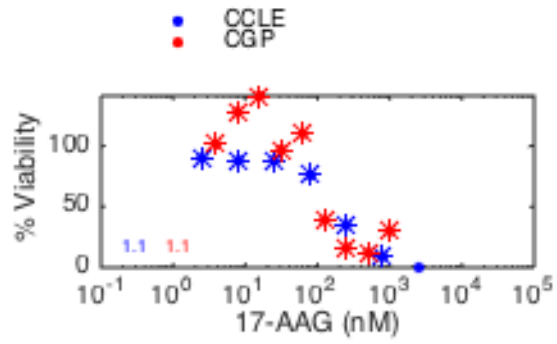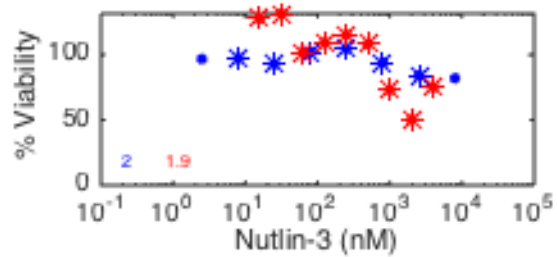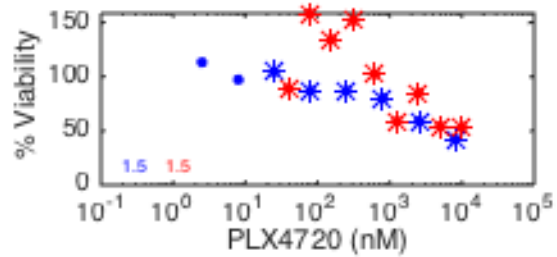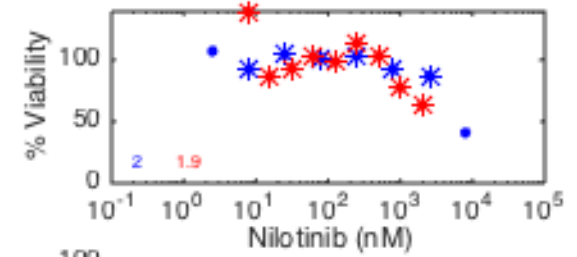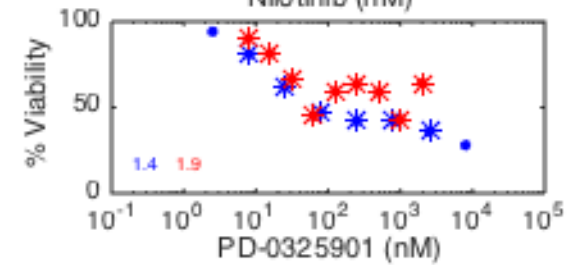

SK-MEL-30

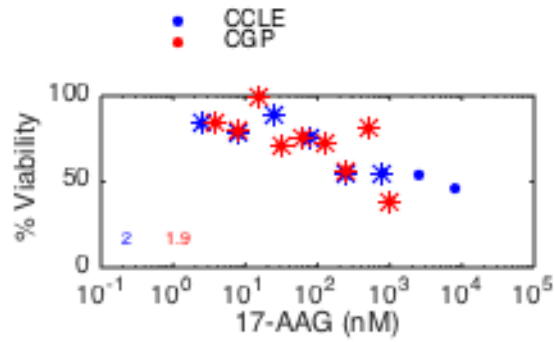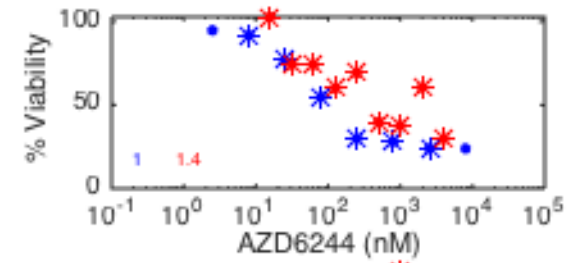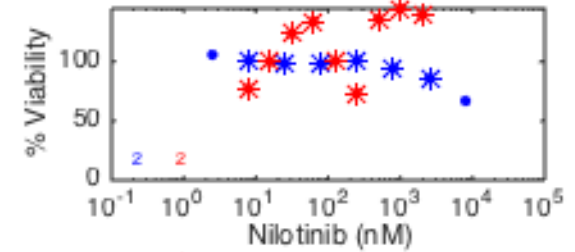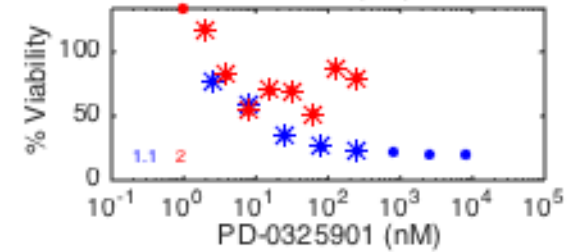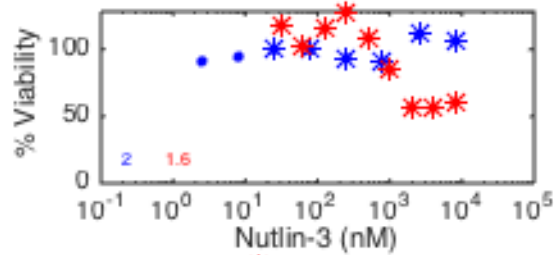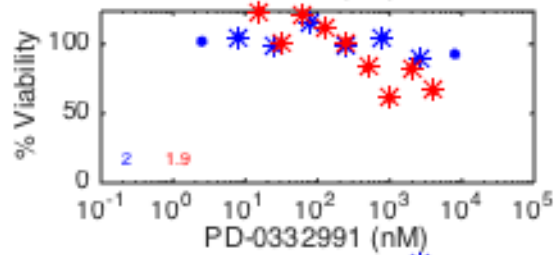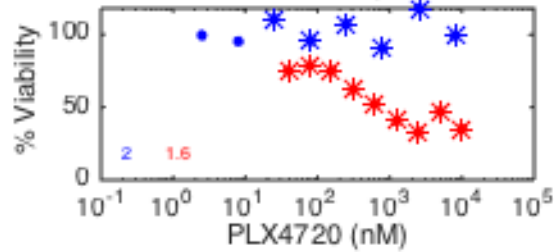

# SK-MES-1

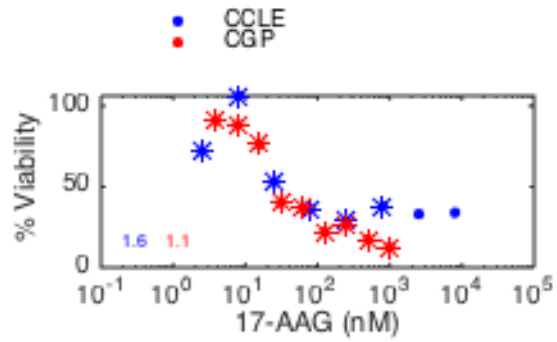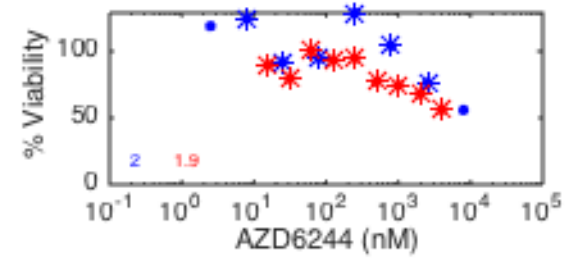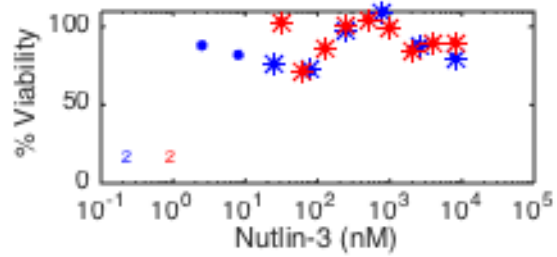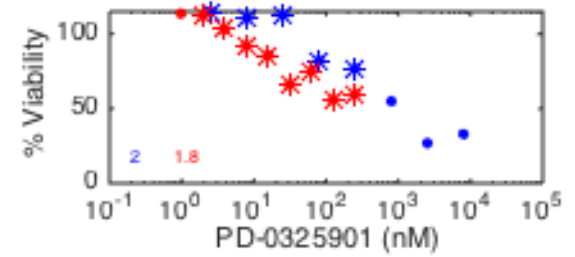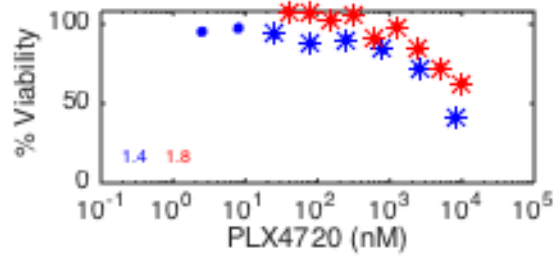





# SK-N-AS

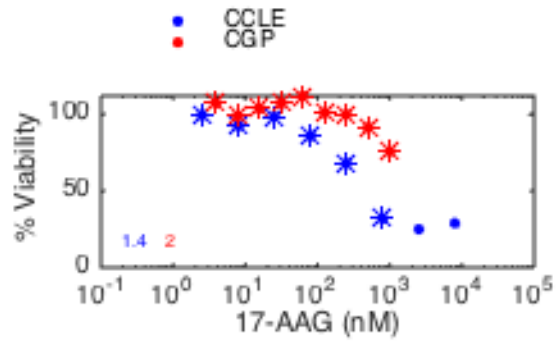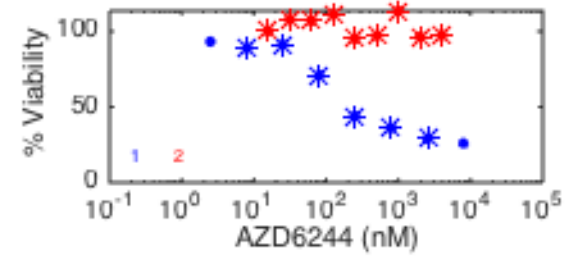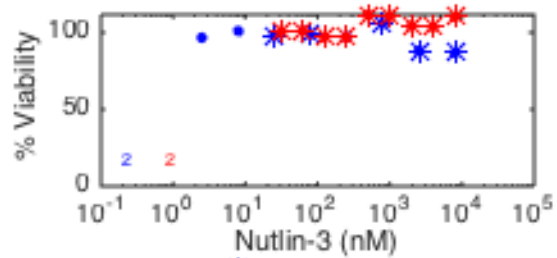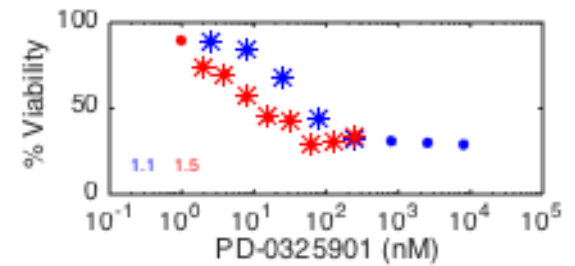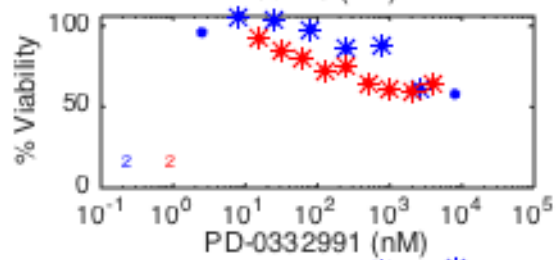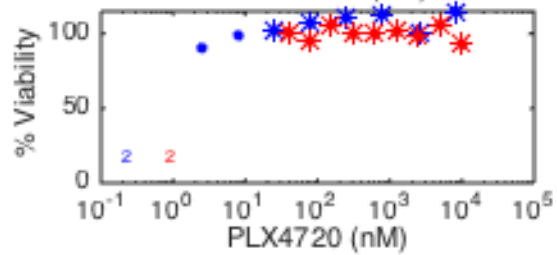

# SK-N-DZ

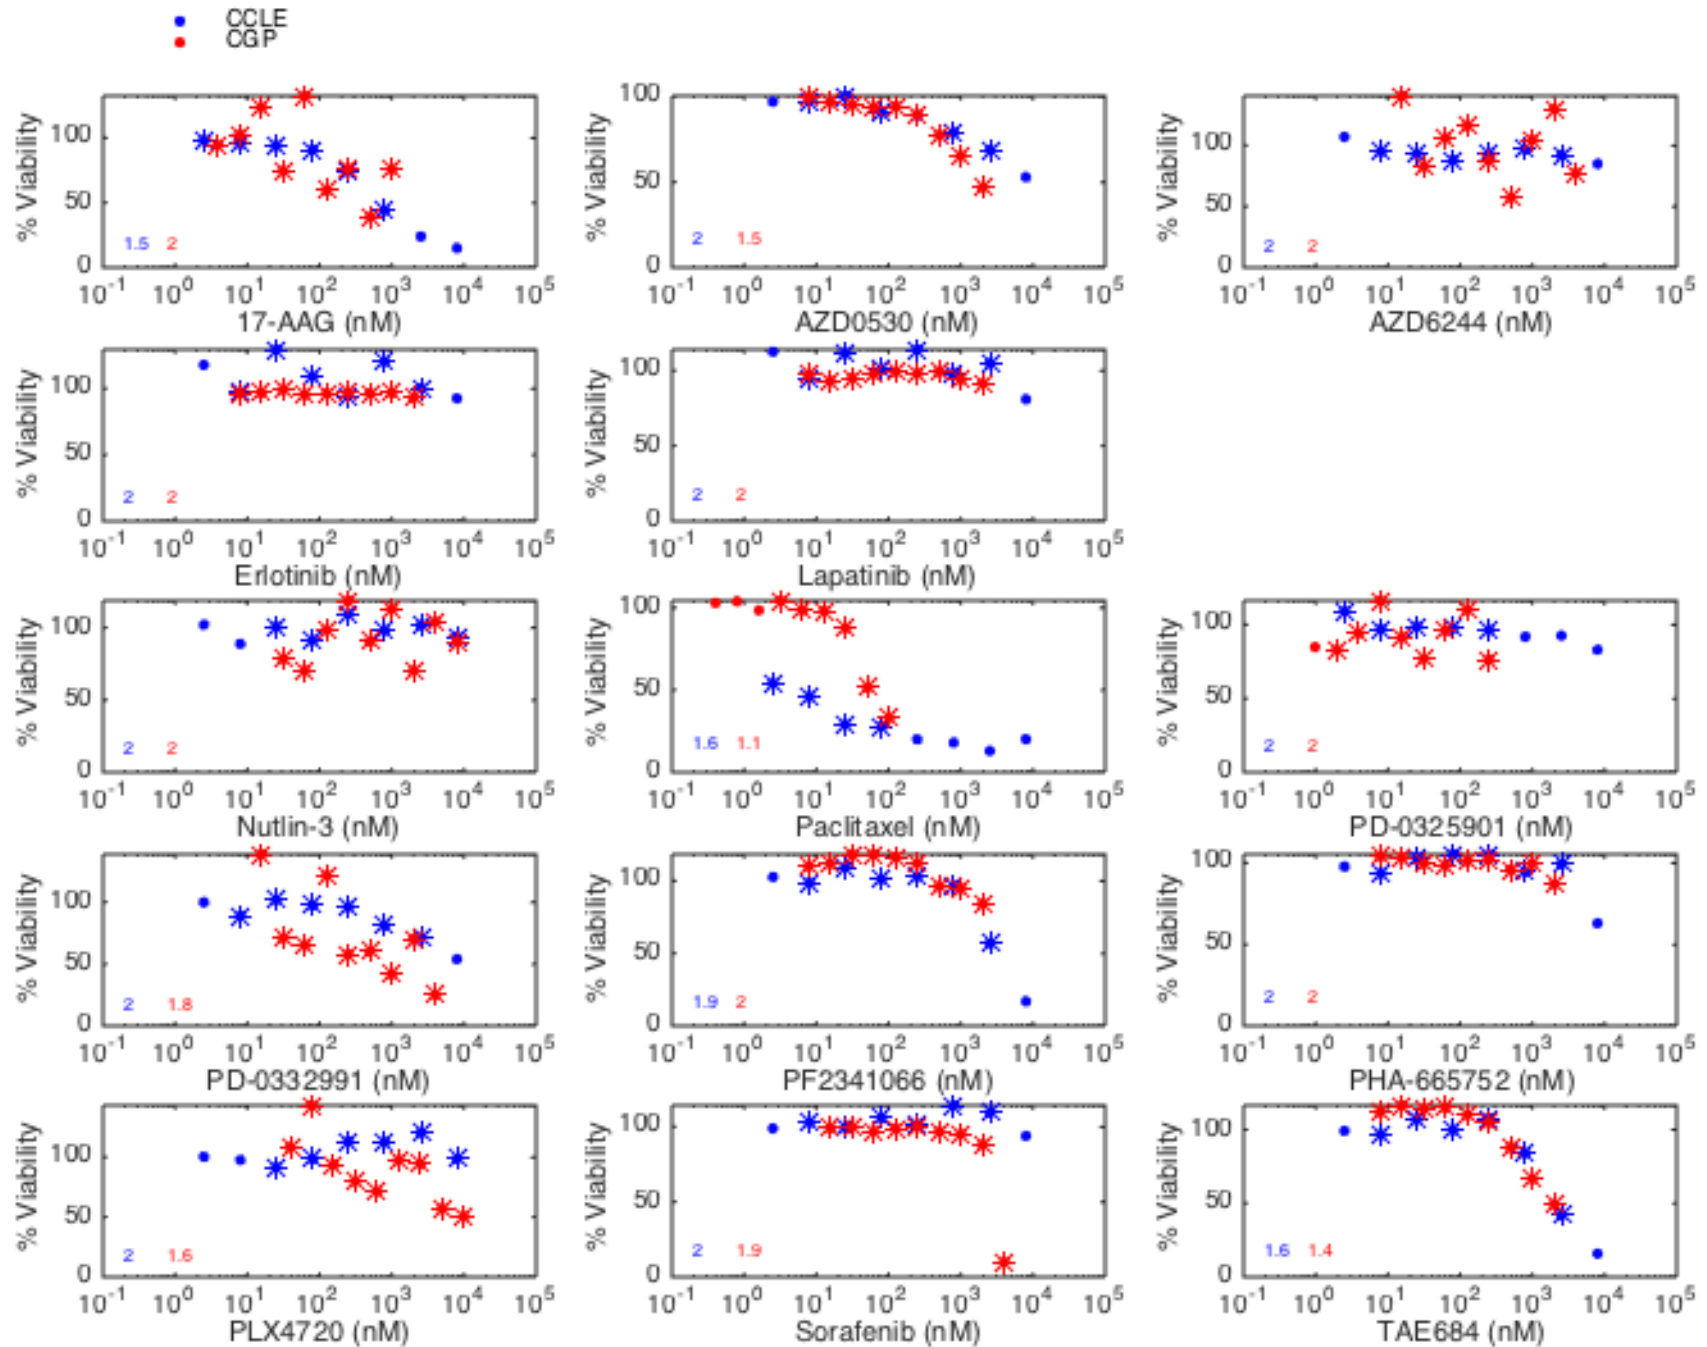

# SK-N-FI

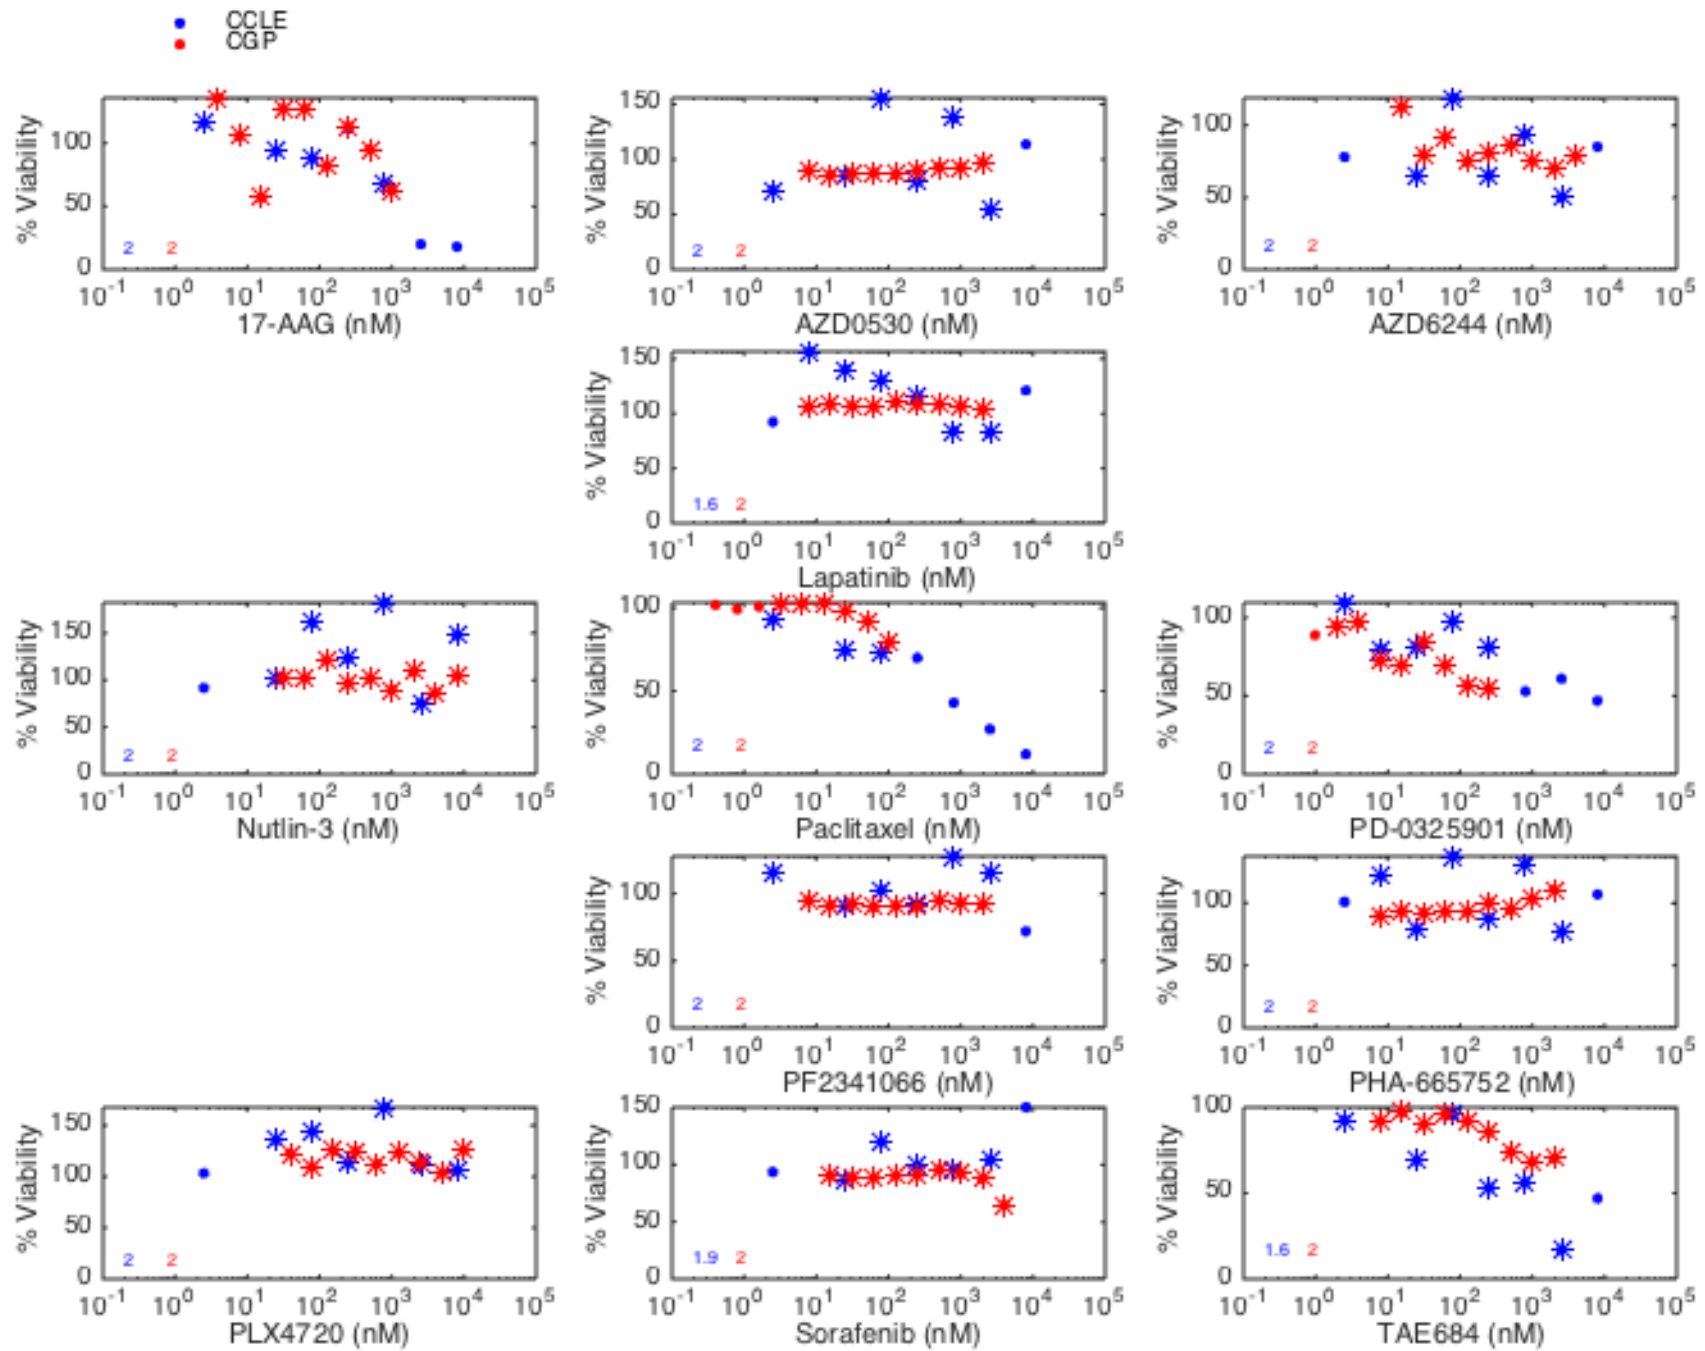

# SK-OV-3

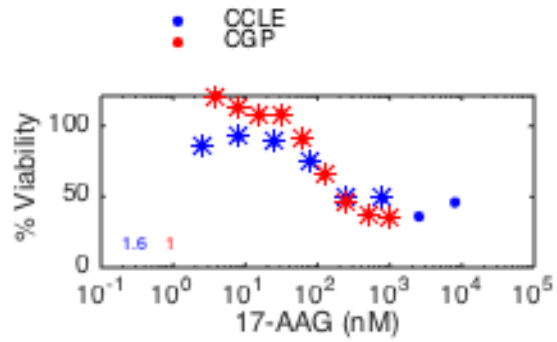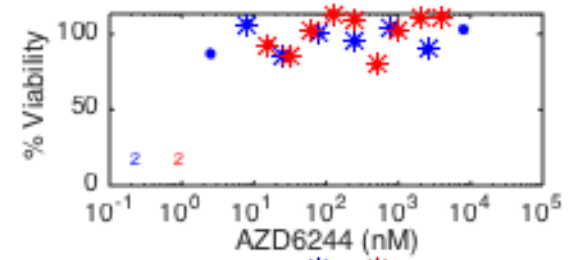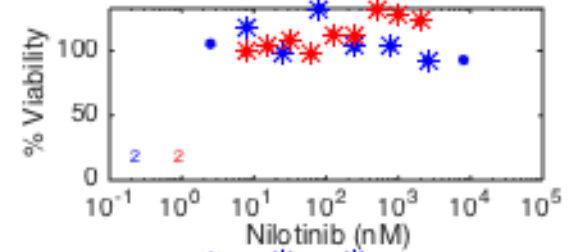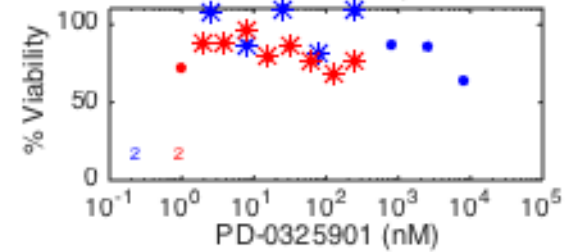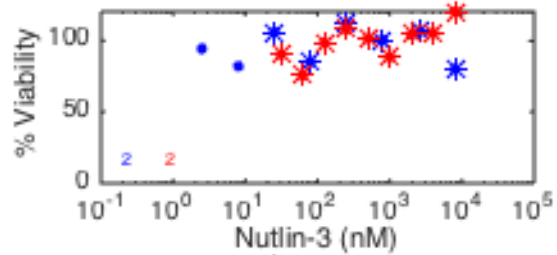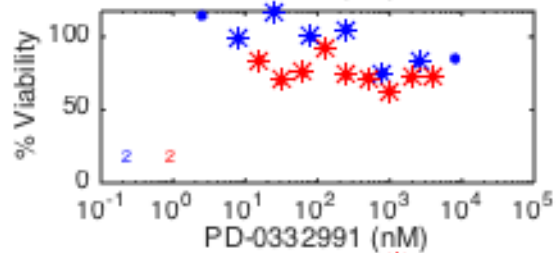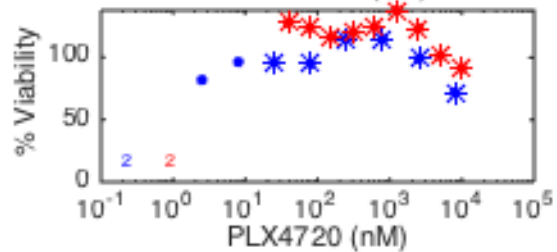

SNG-M

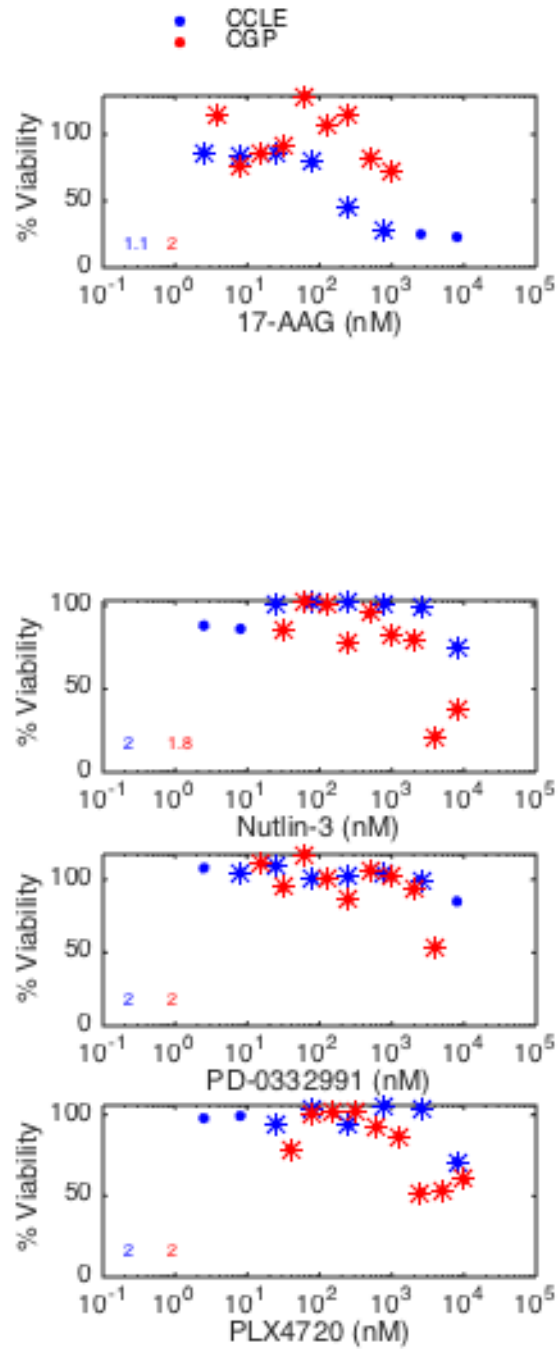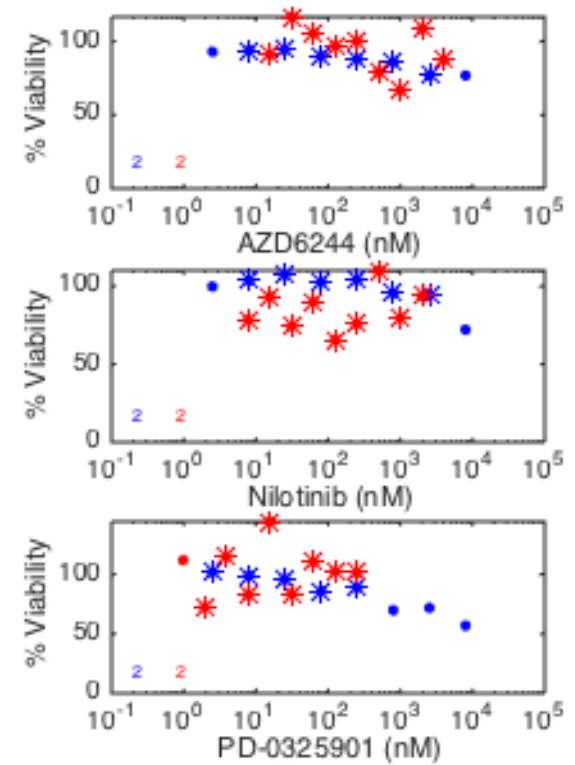

SNU-387

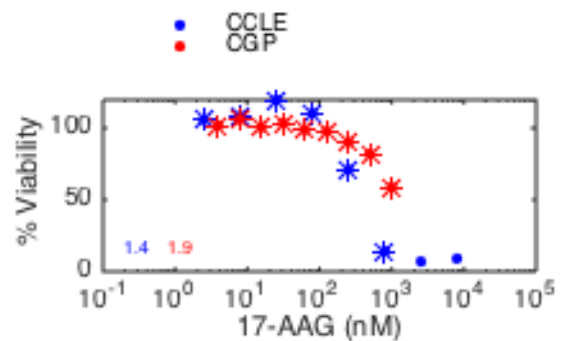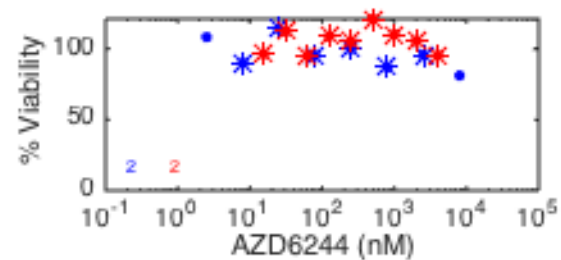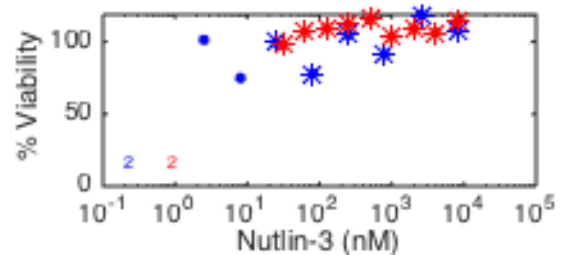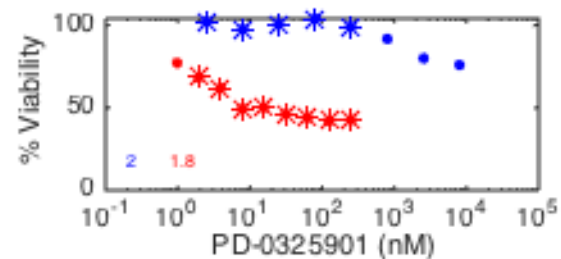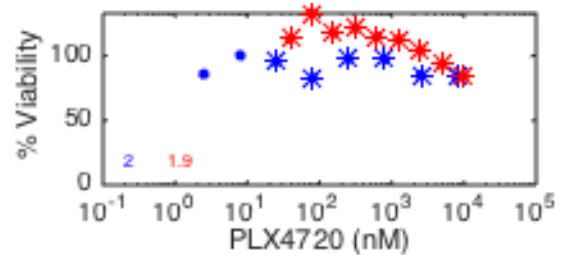

# SNU-423

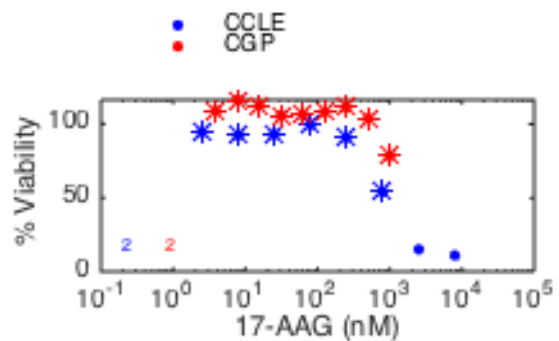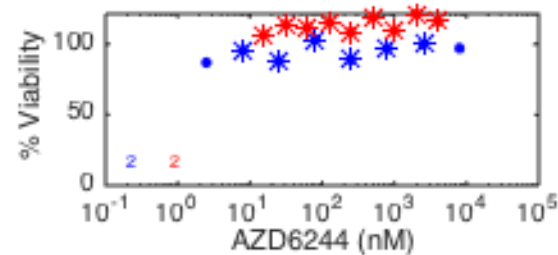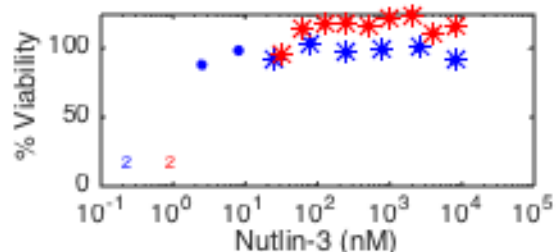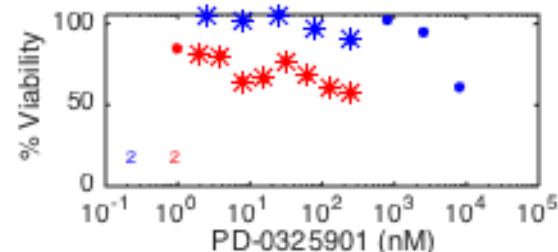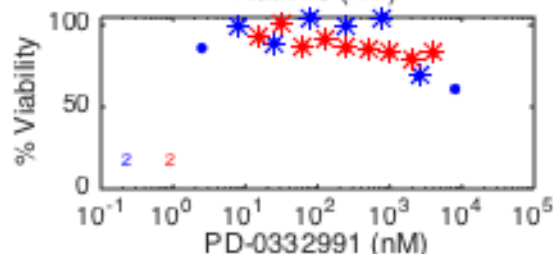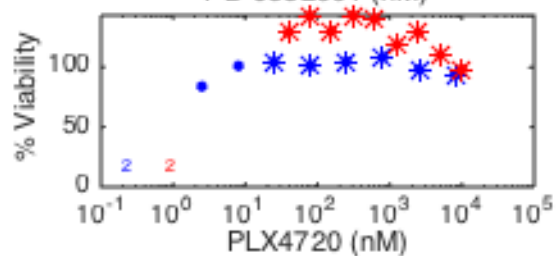

SNU-449

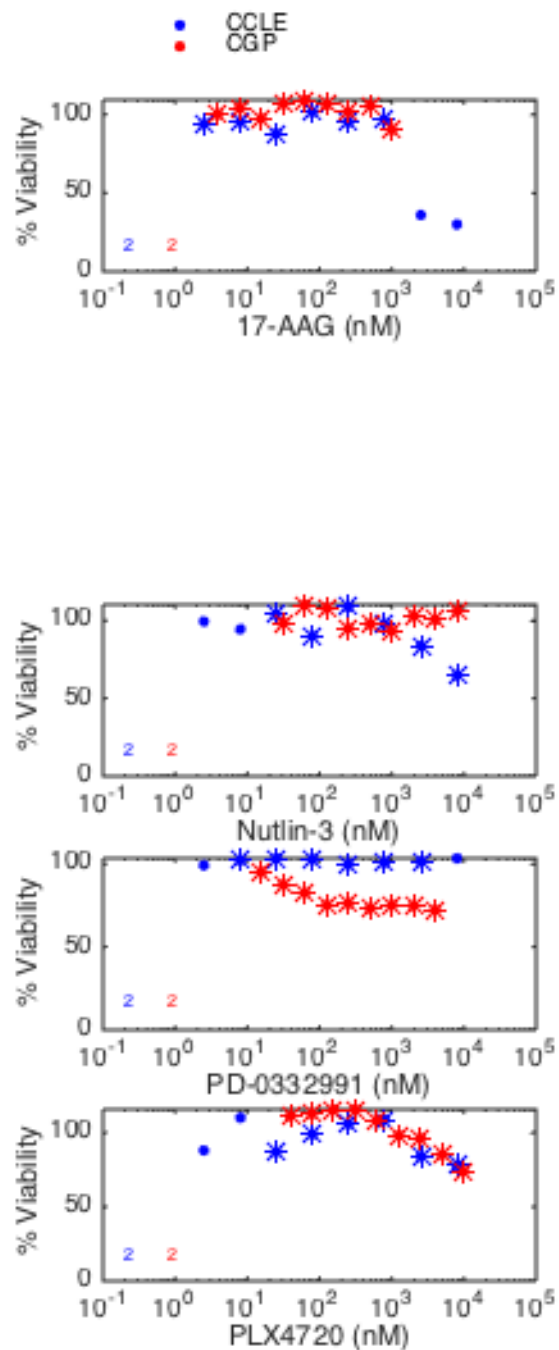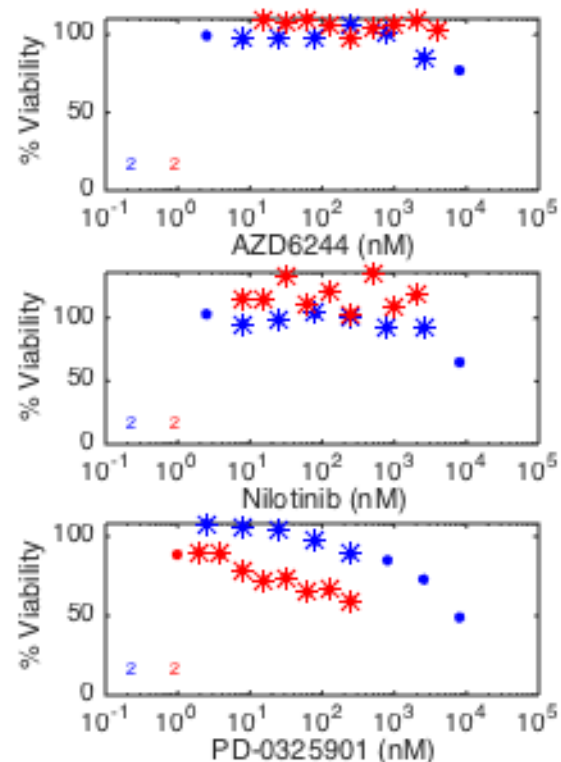



# SNU-C2B

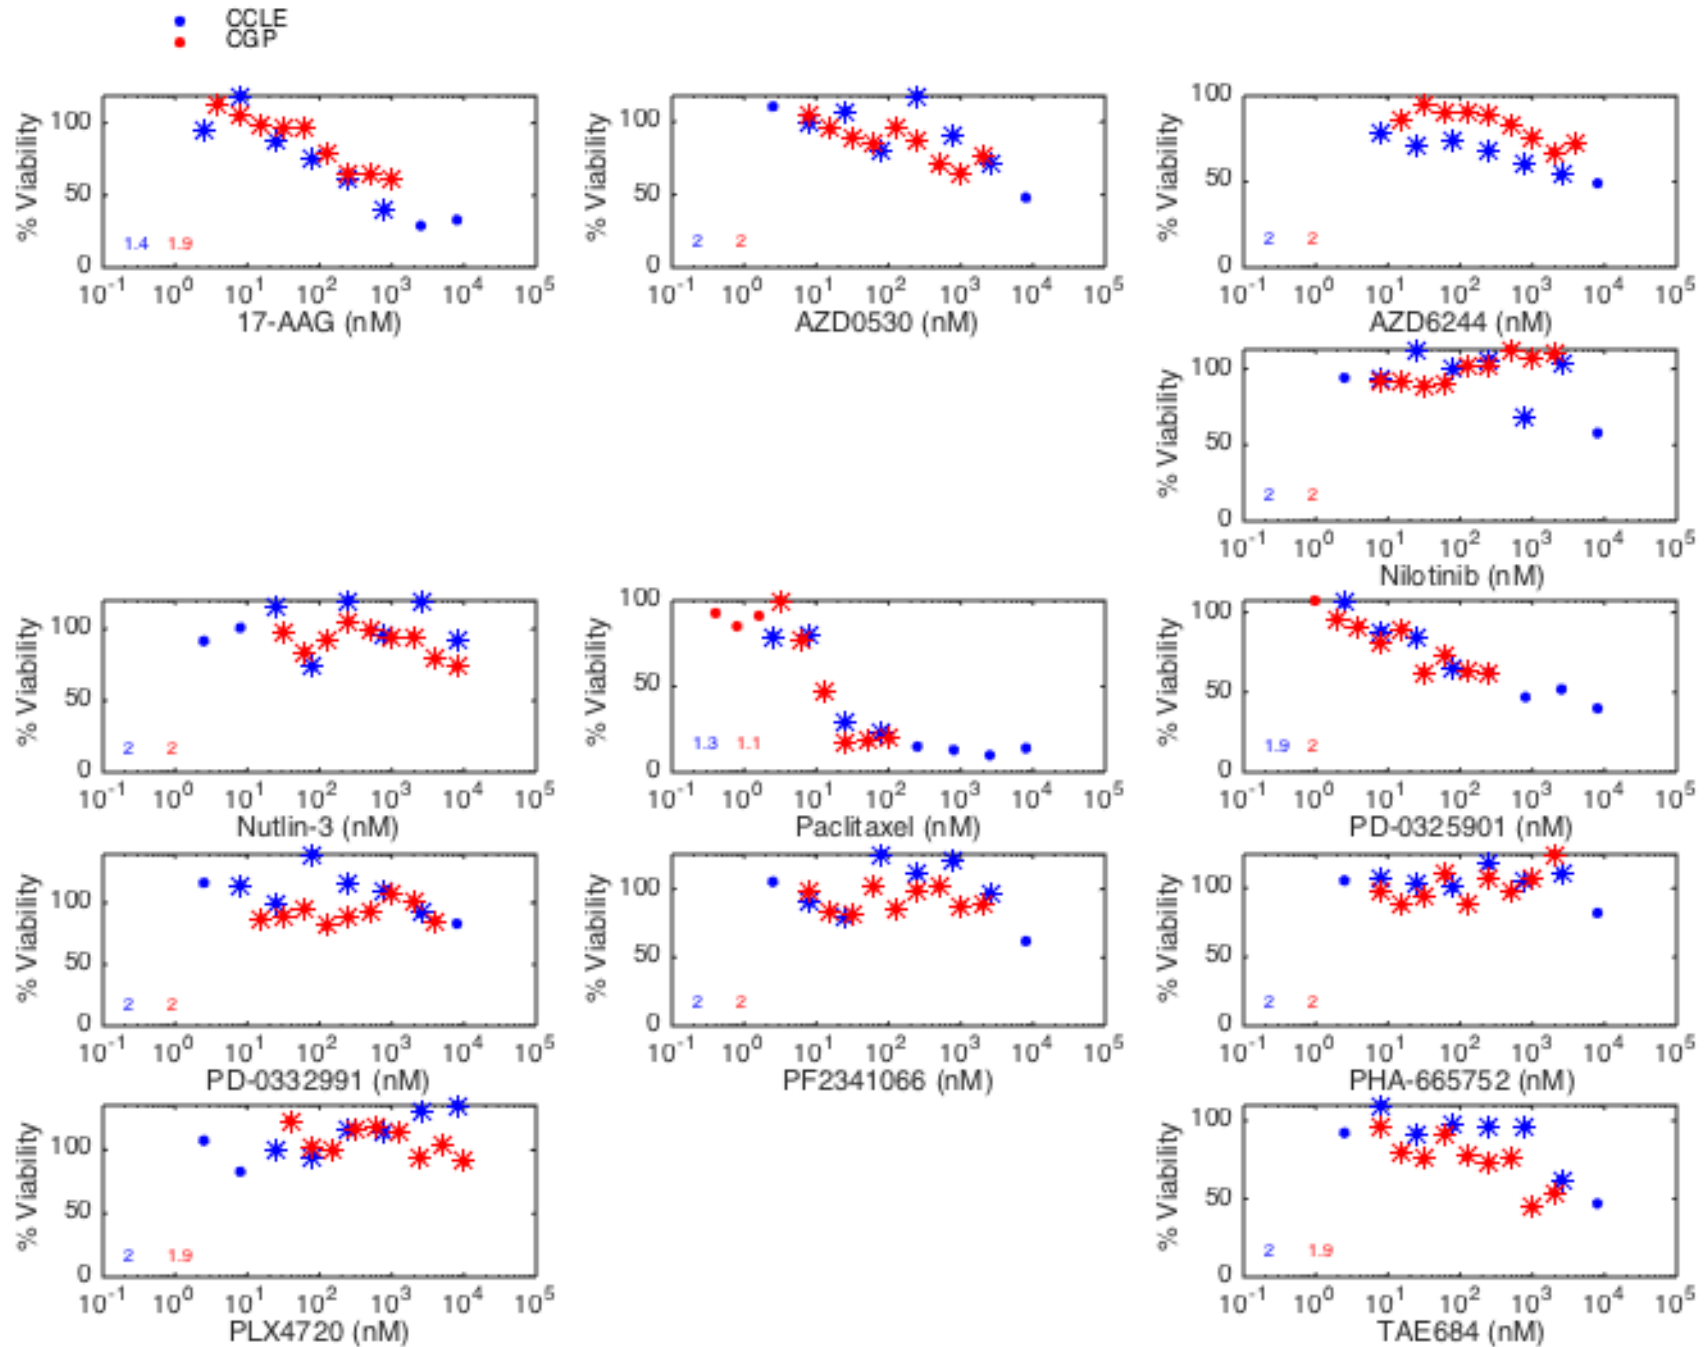

# SUP-T1

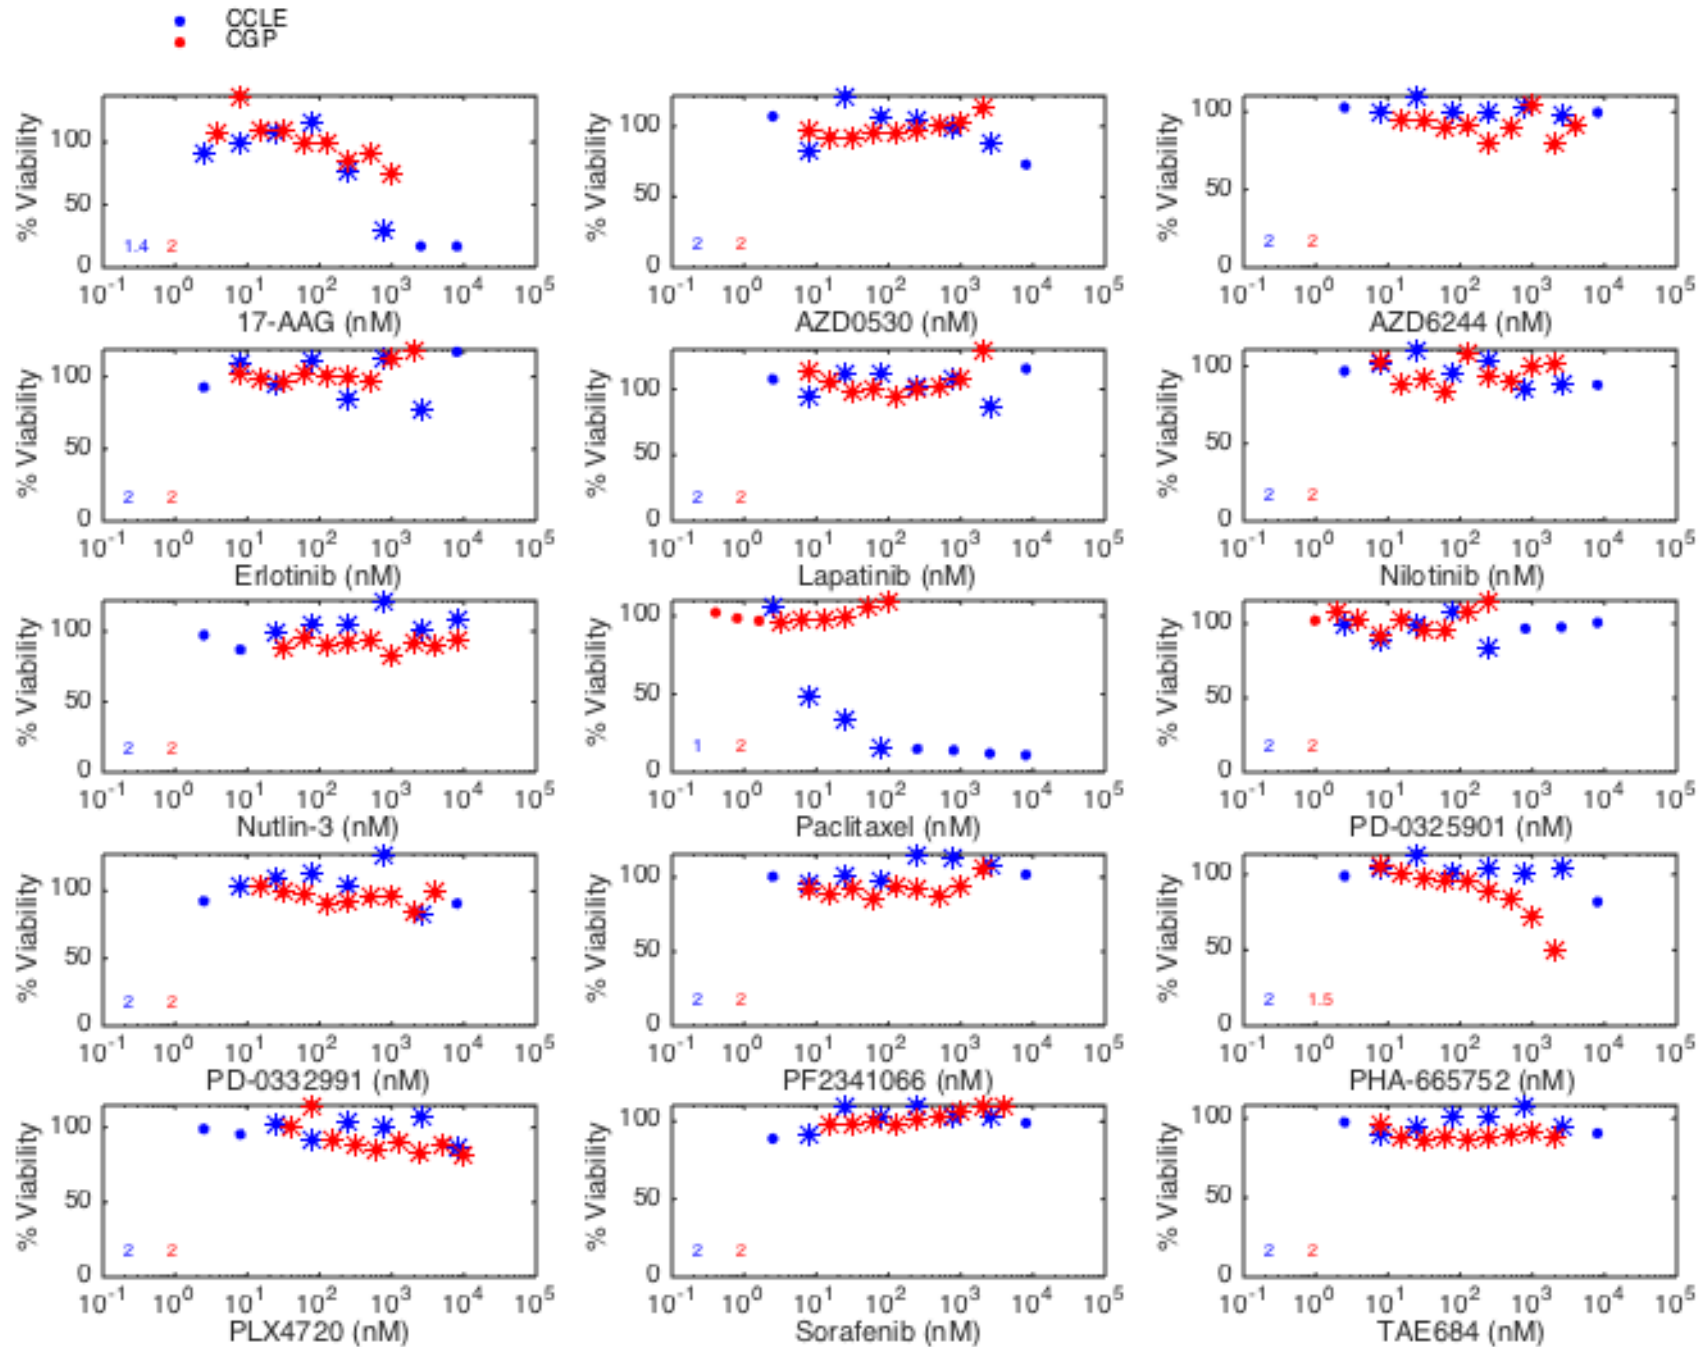

SW48

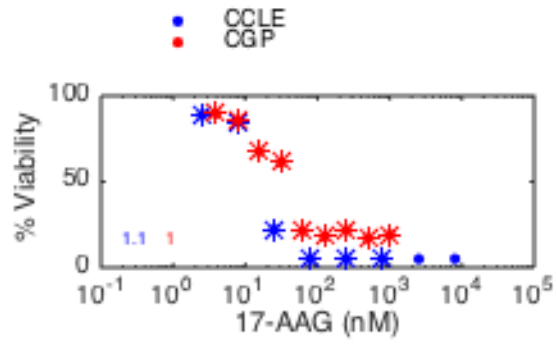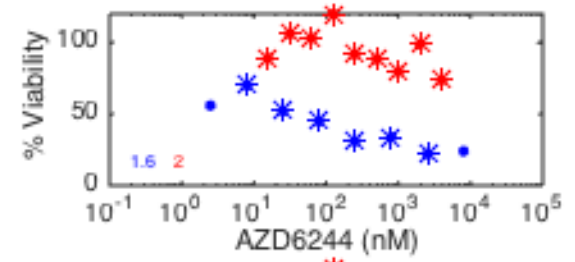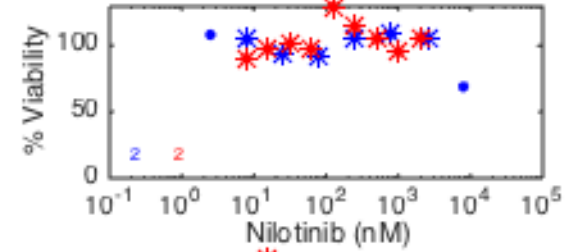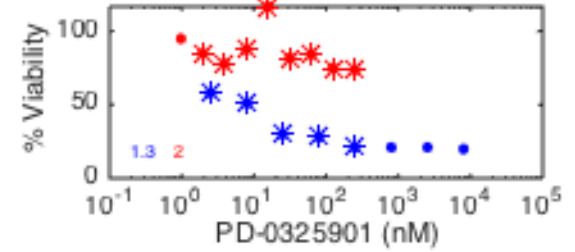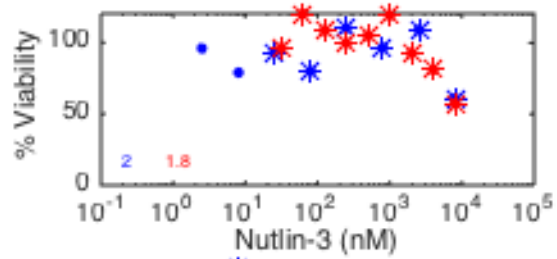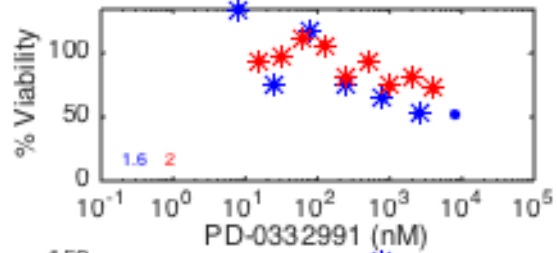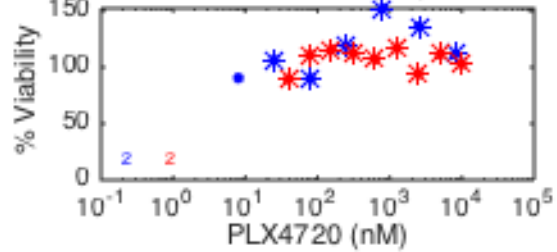

SW620

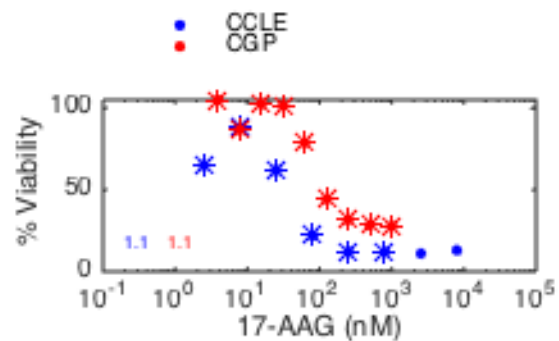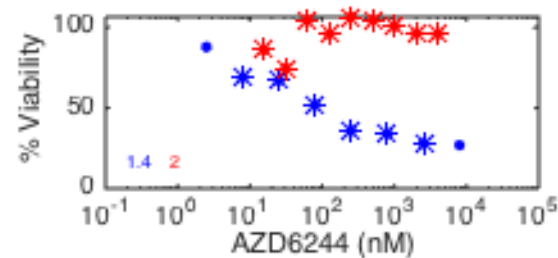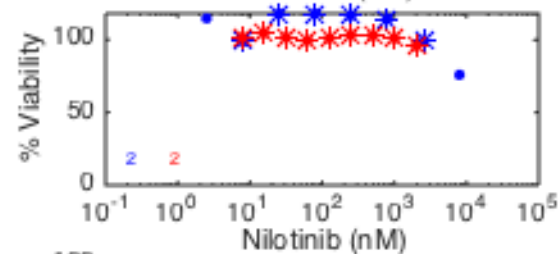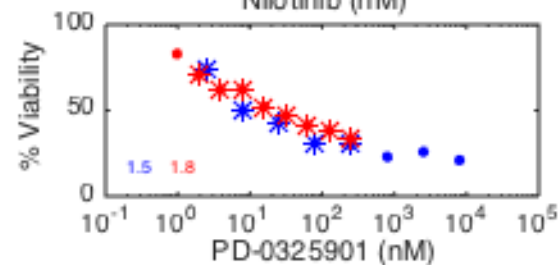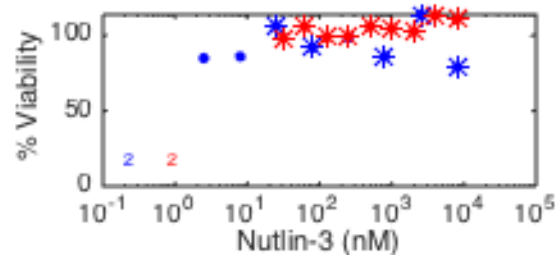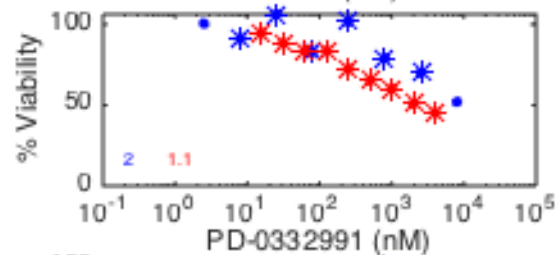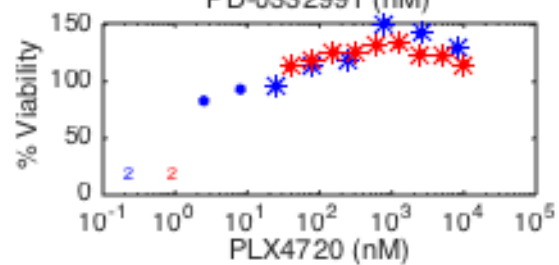

SW780

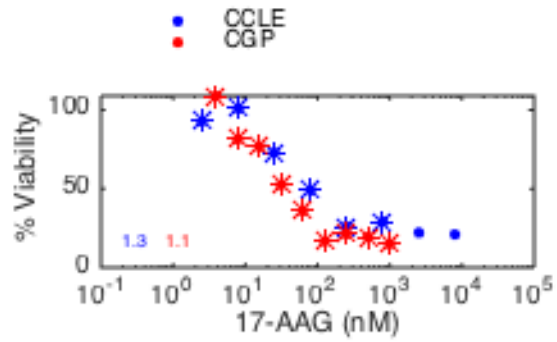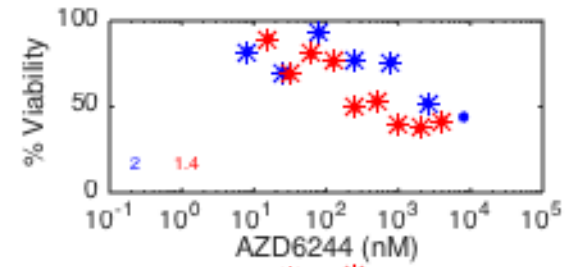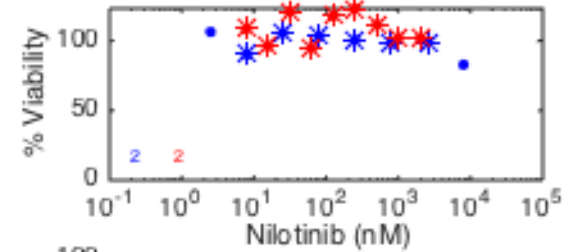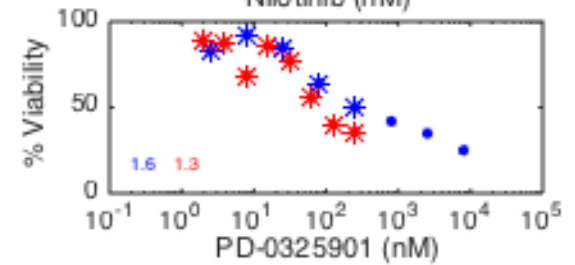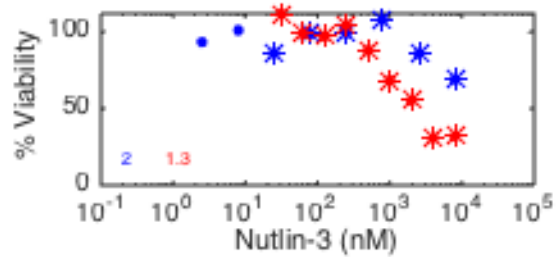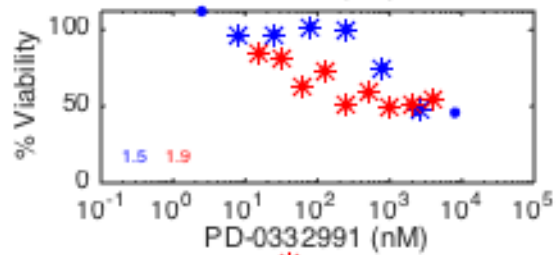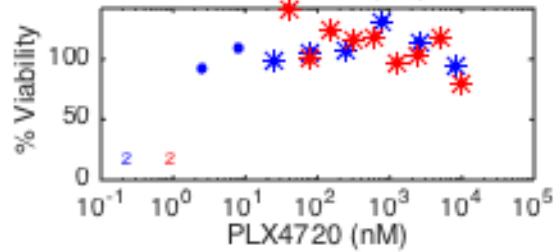

SW900

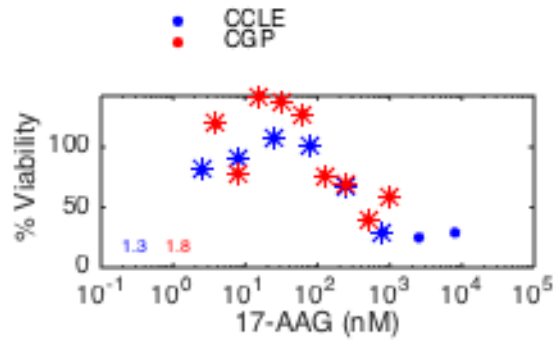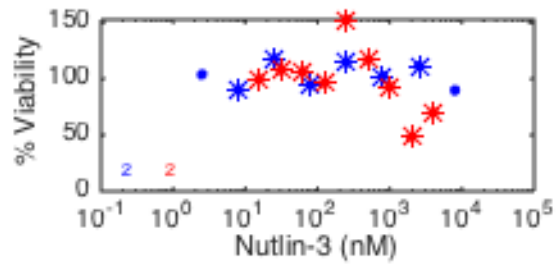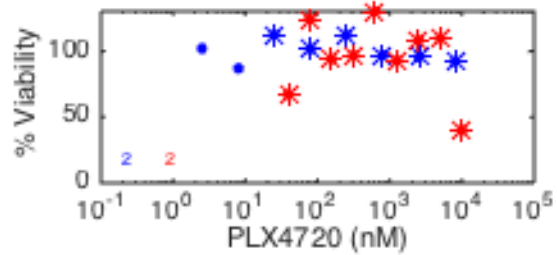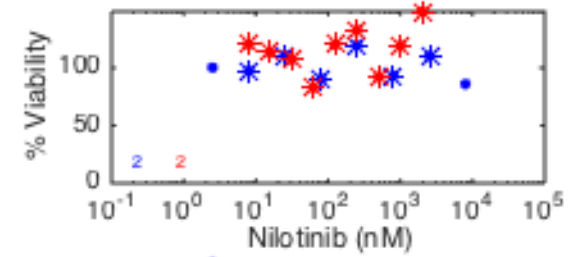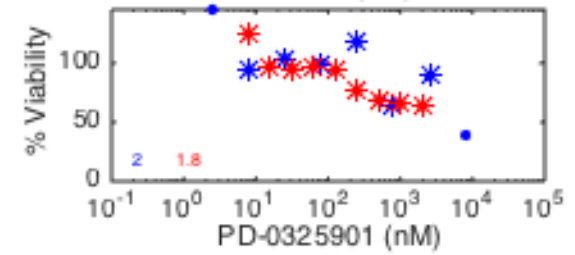

SW1088

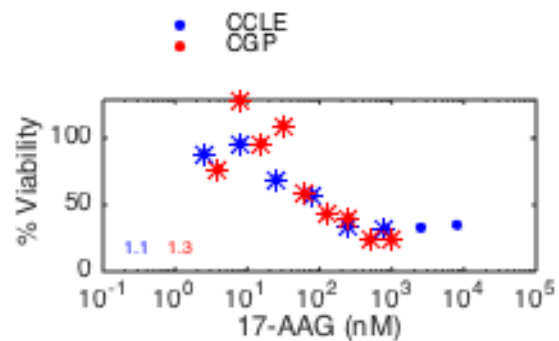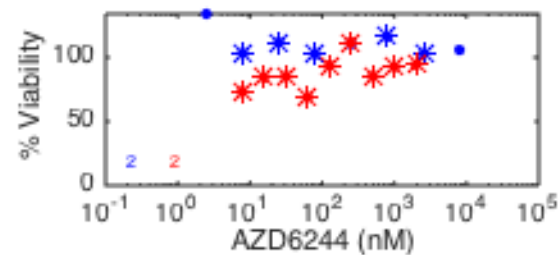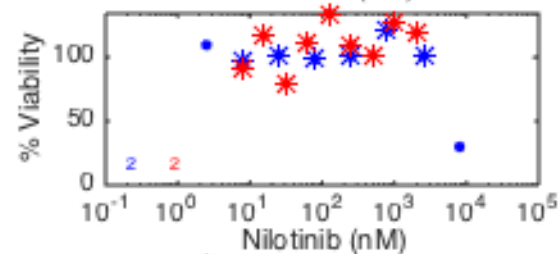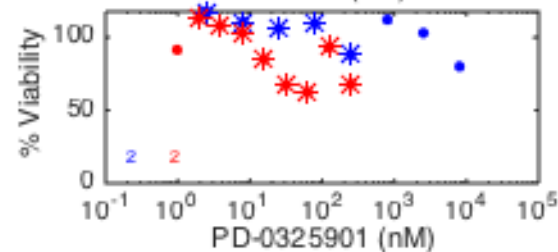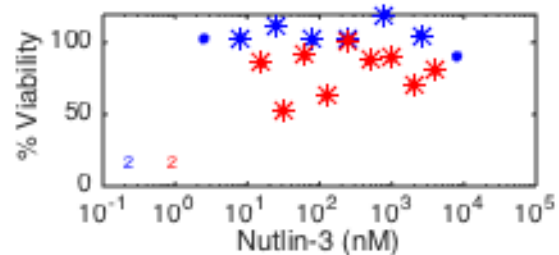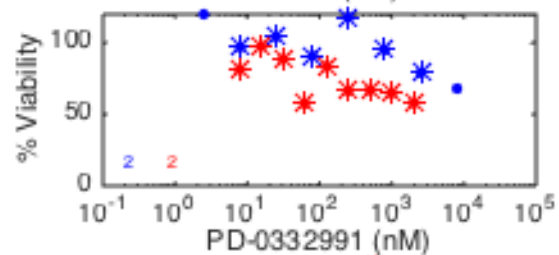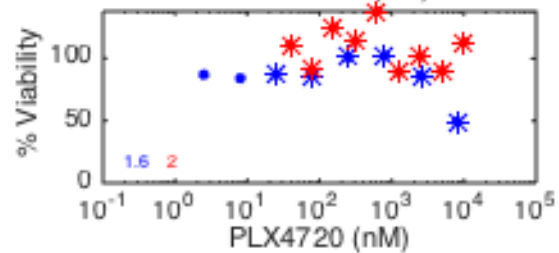

SW1417

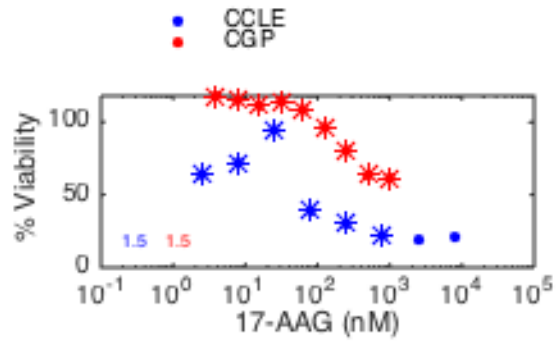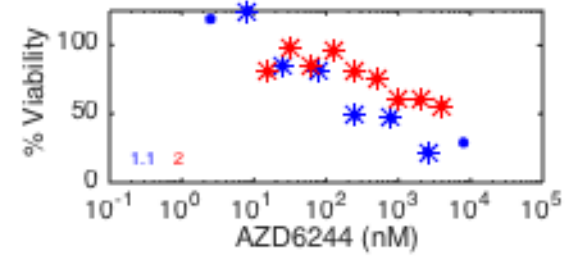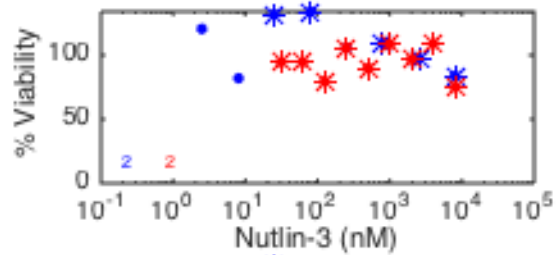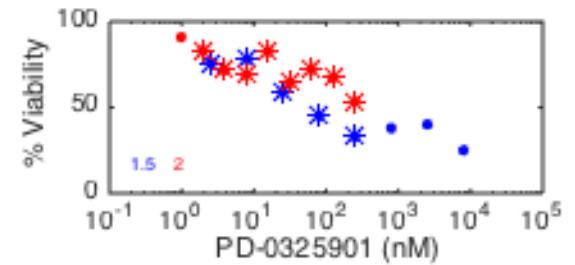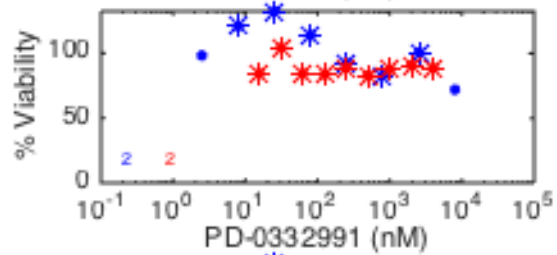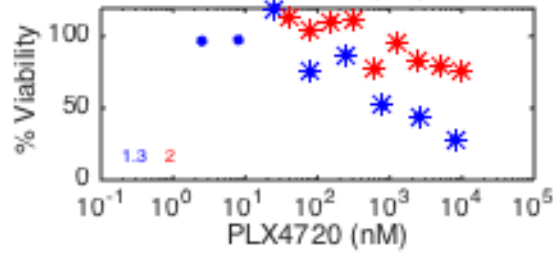



# SW1573

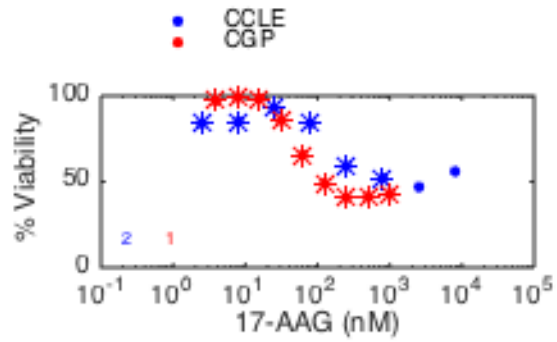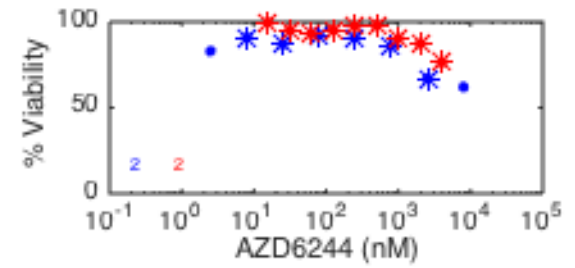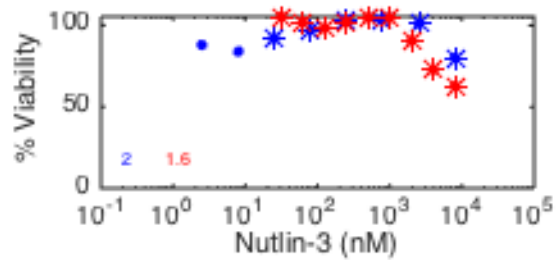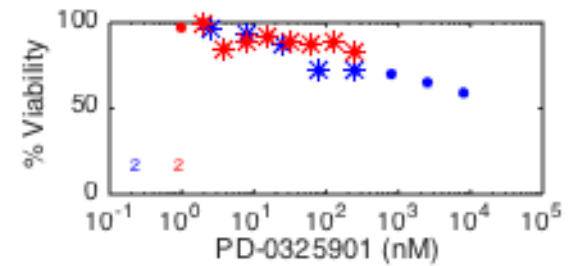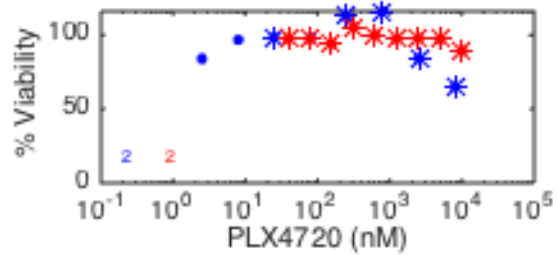

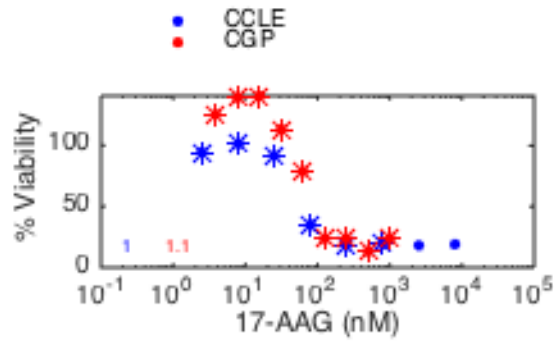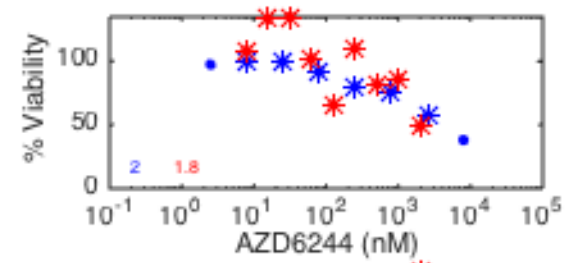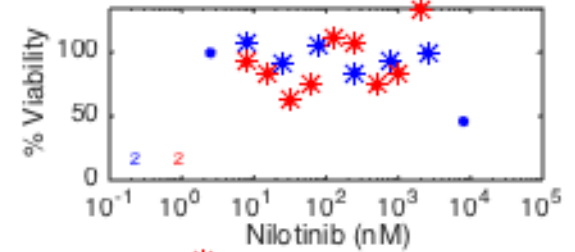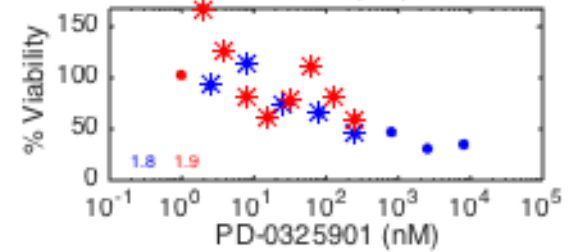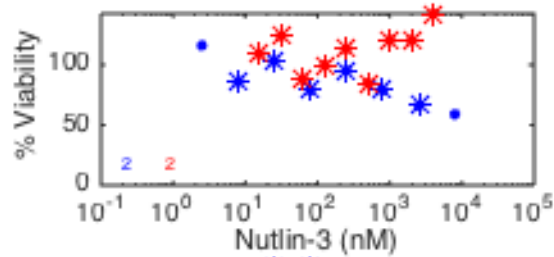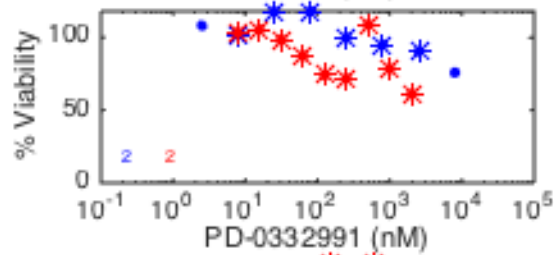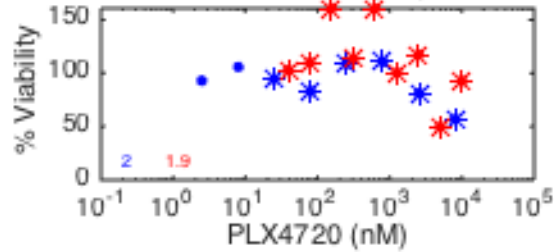

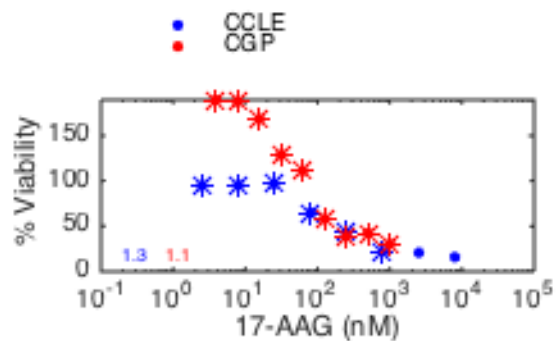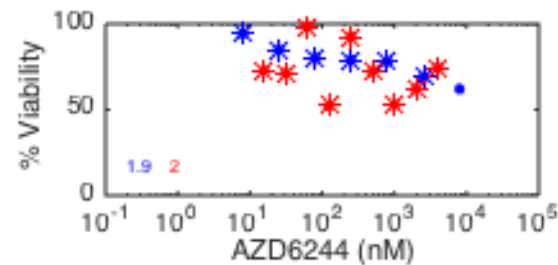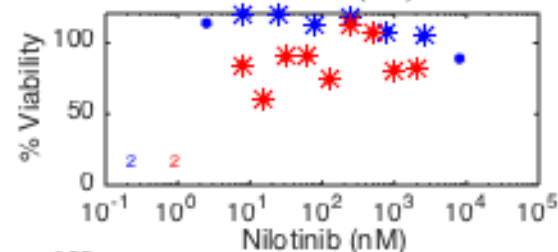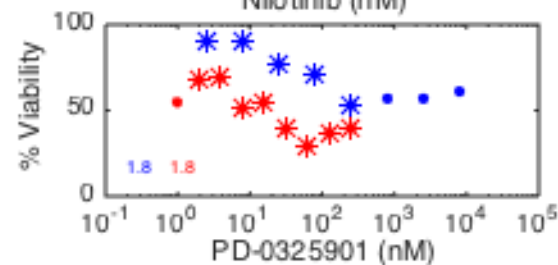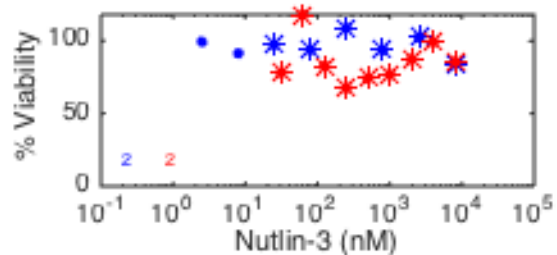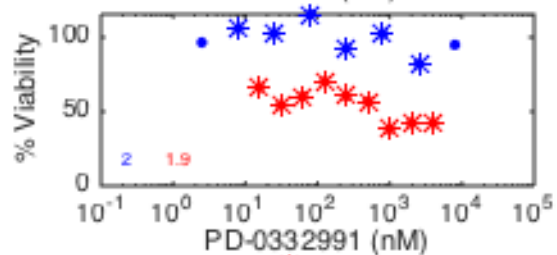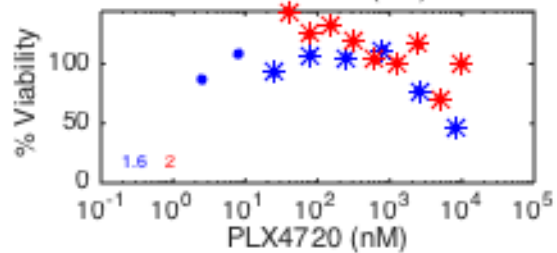

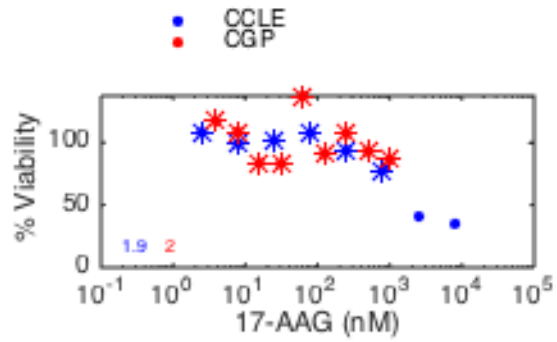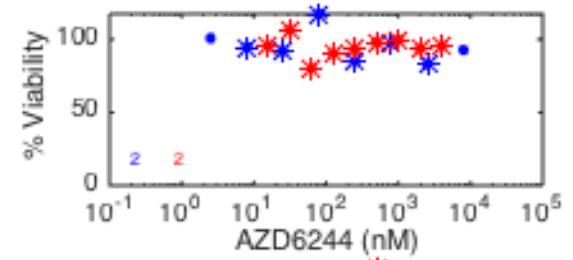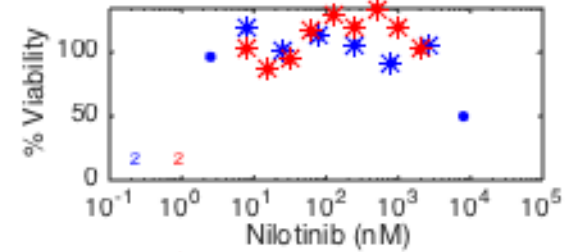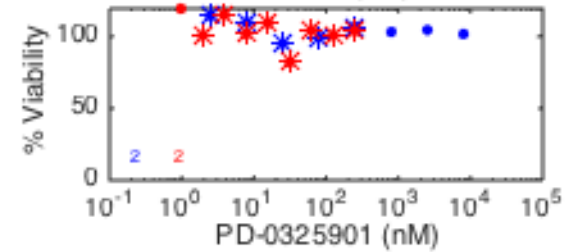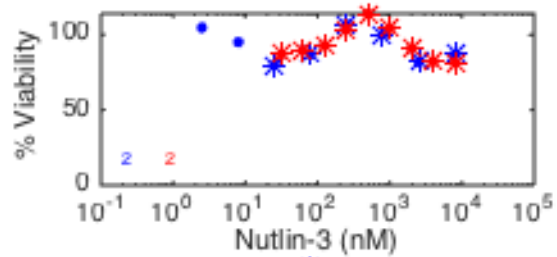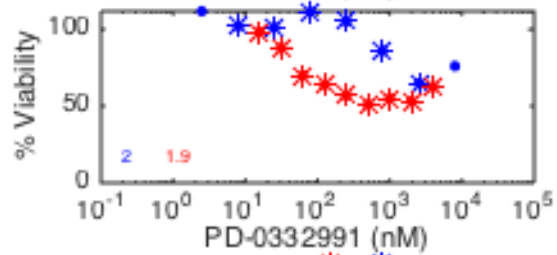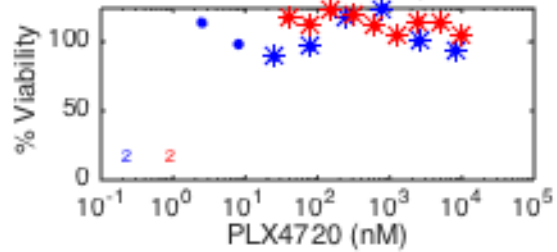

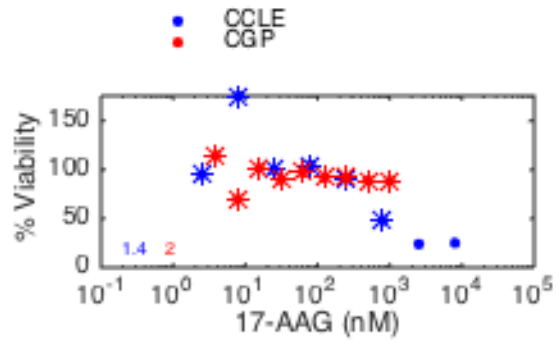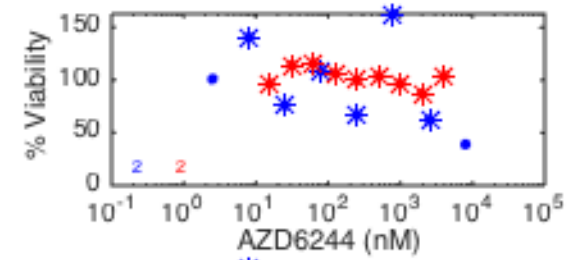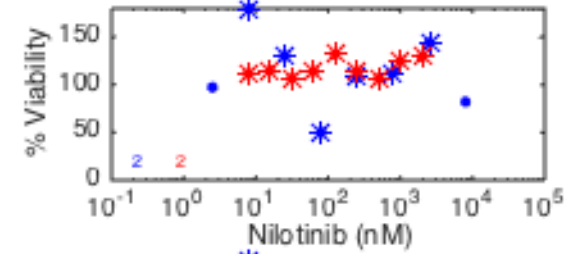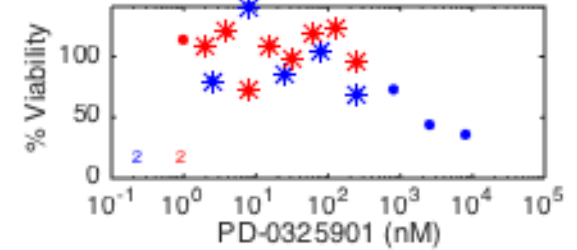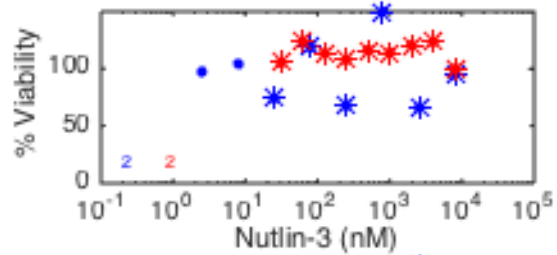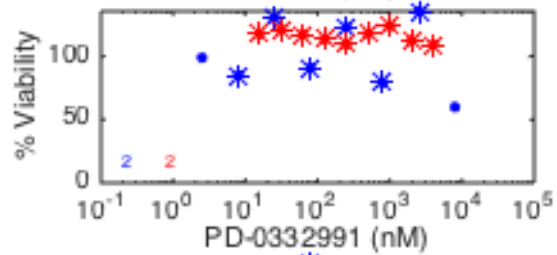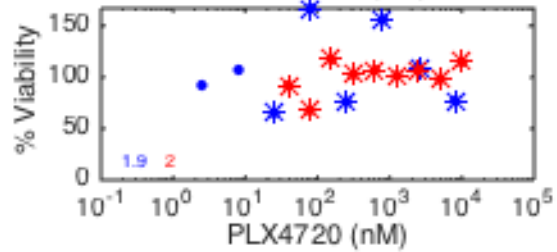

T98G

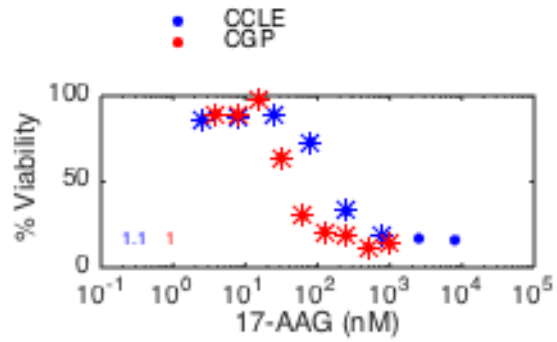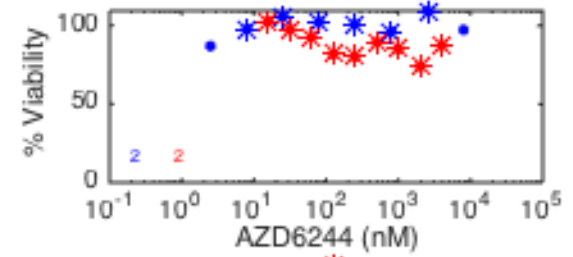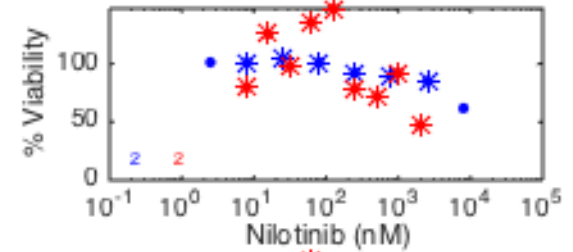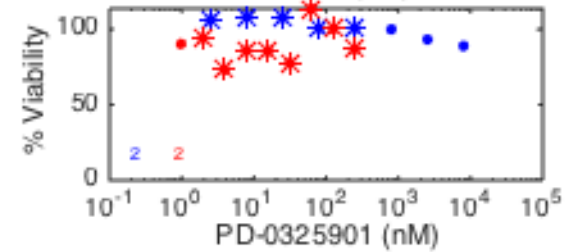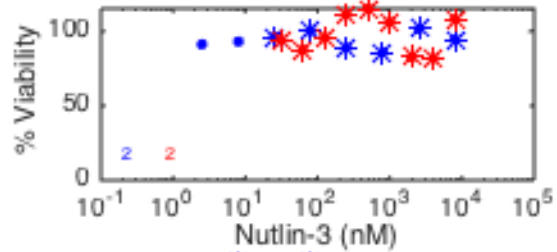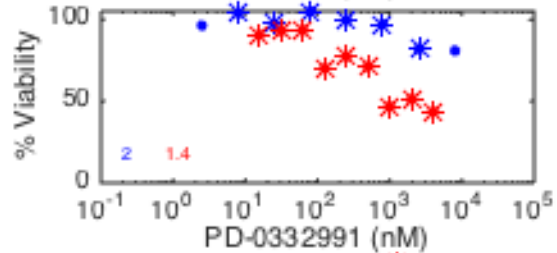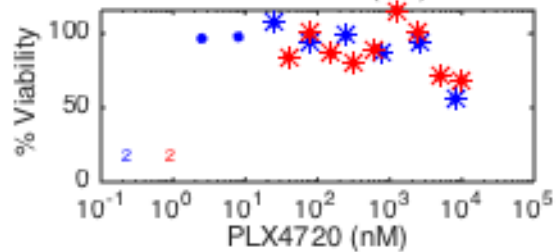

# TCCSUP

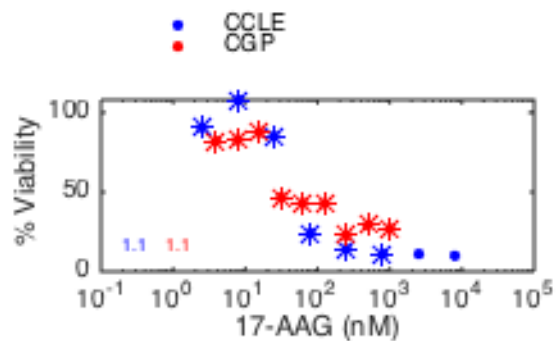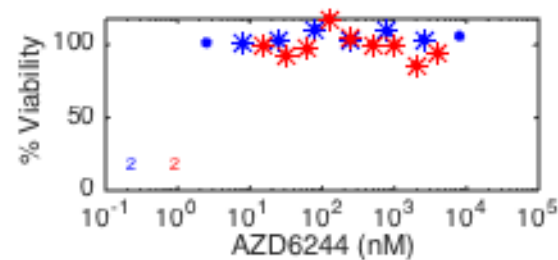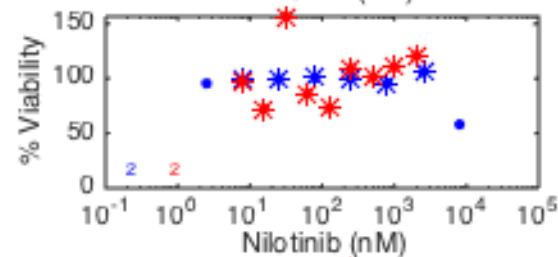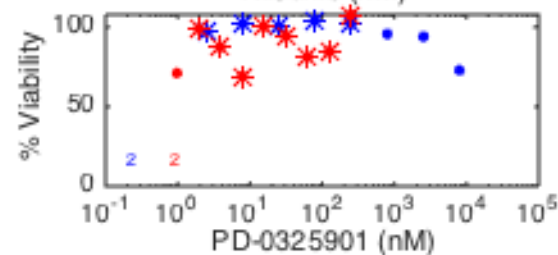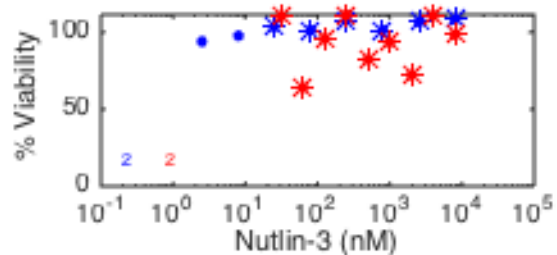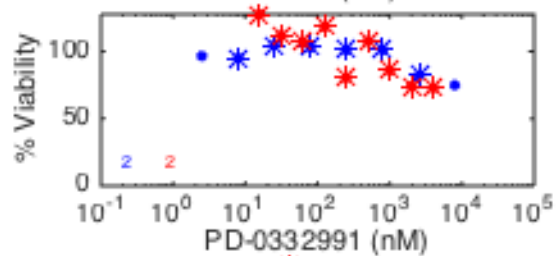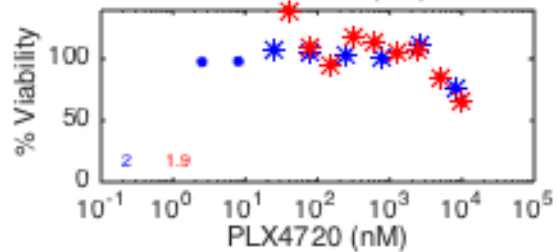

# TE-1

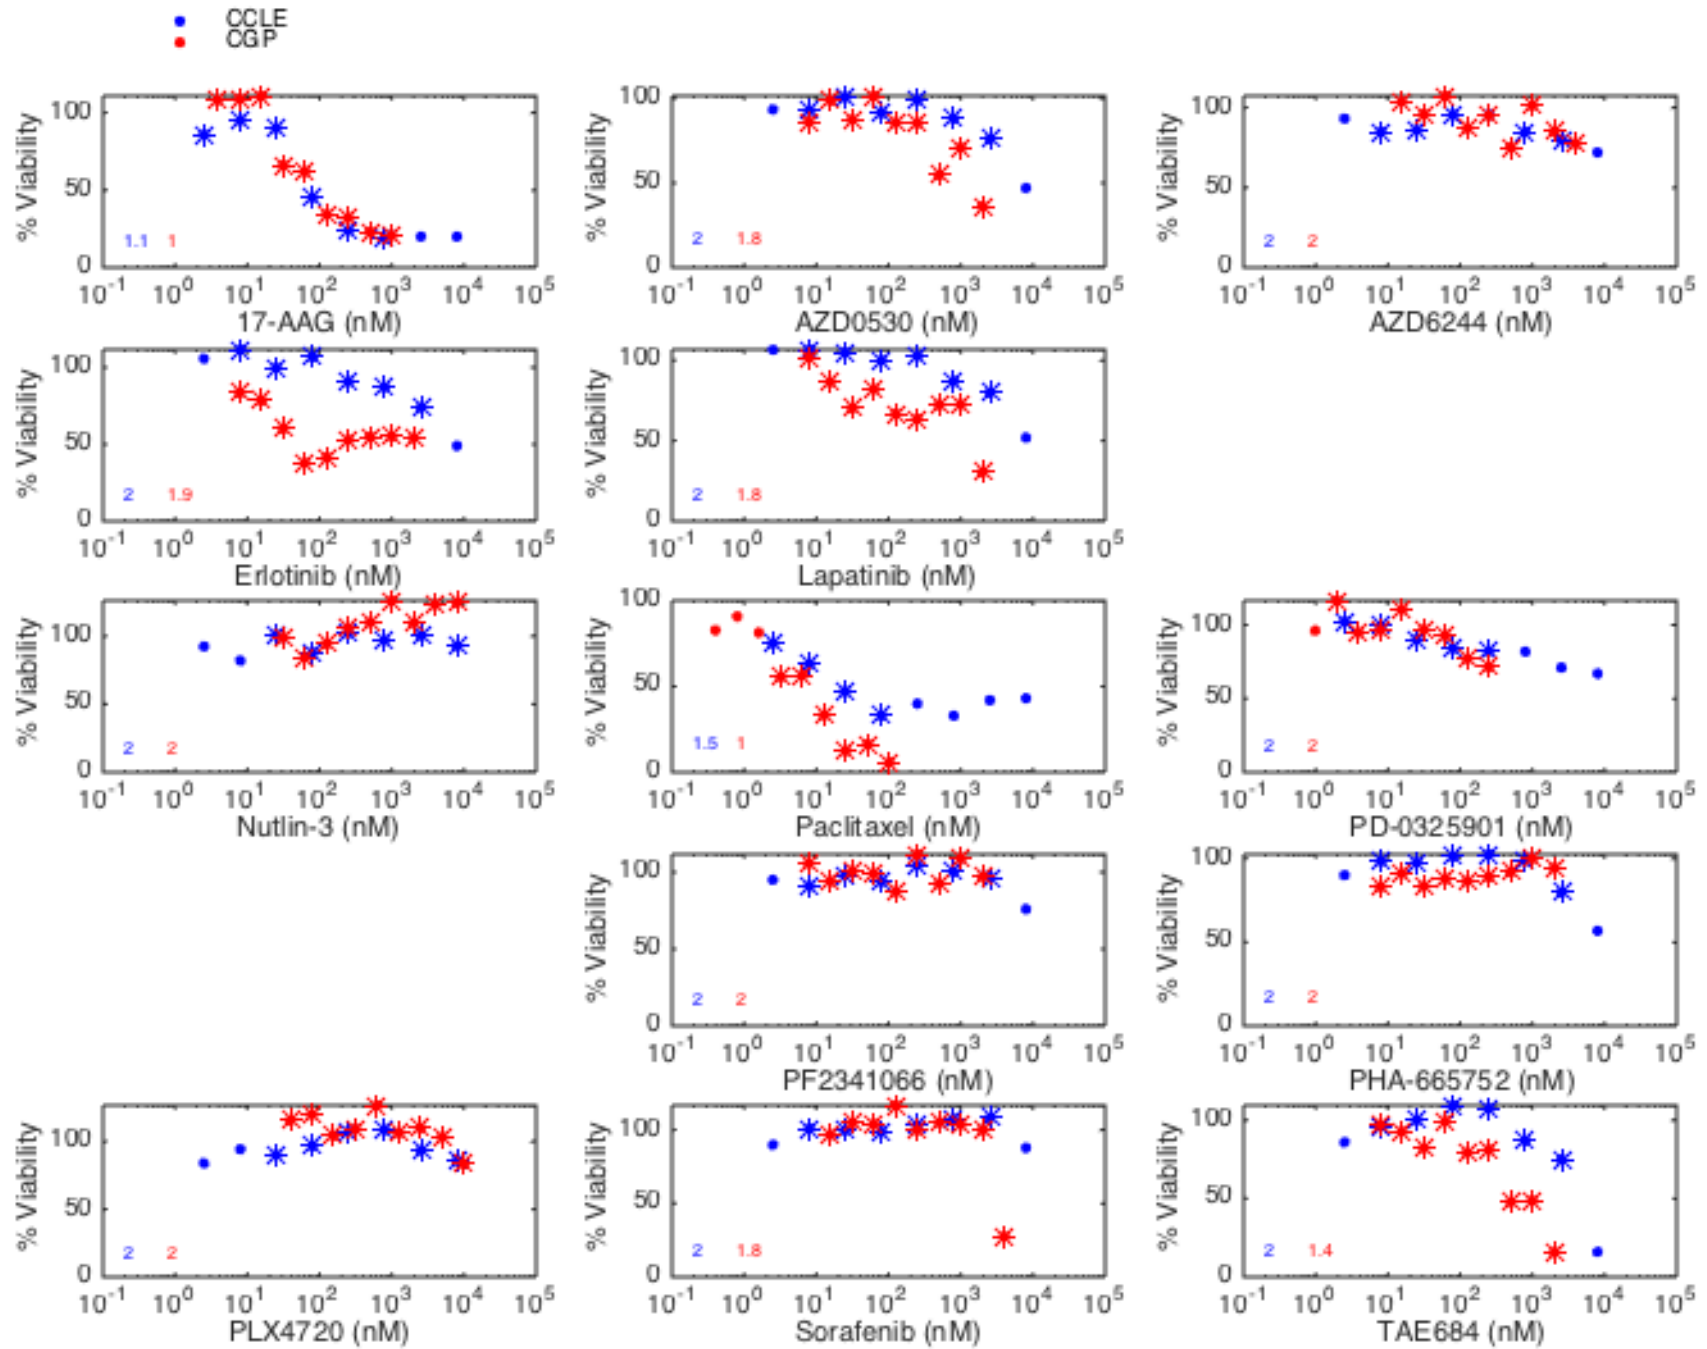



# TE-5

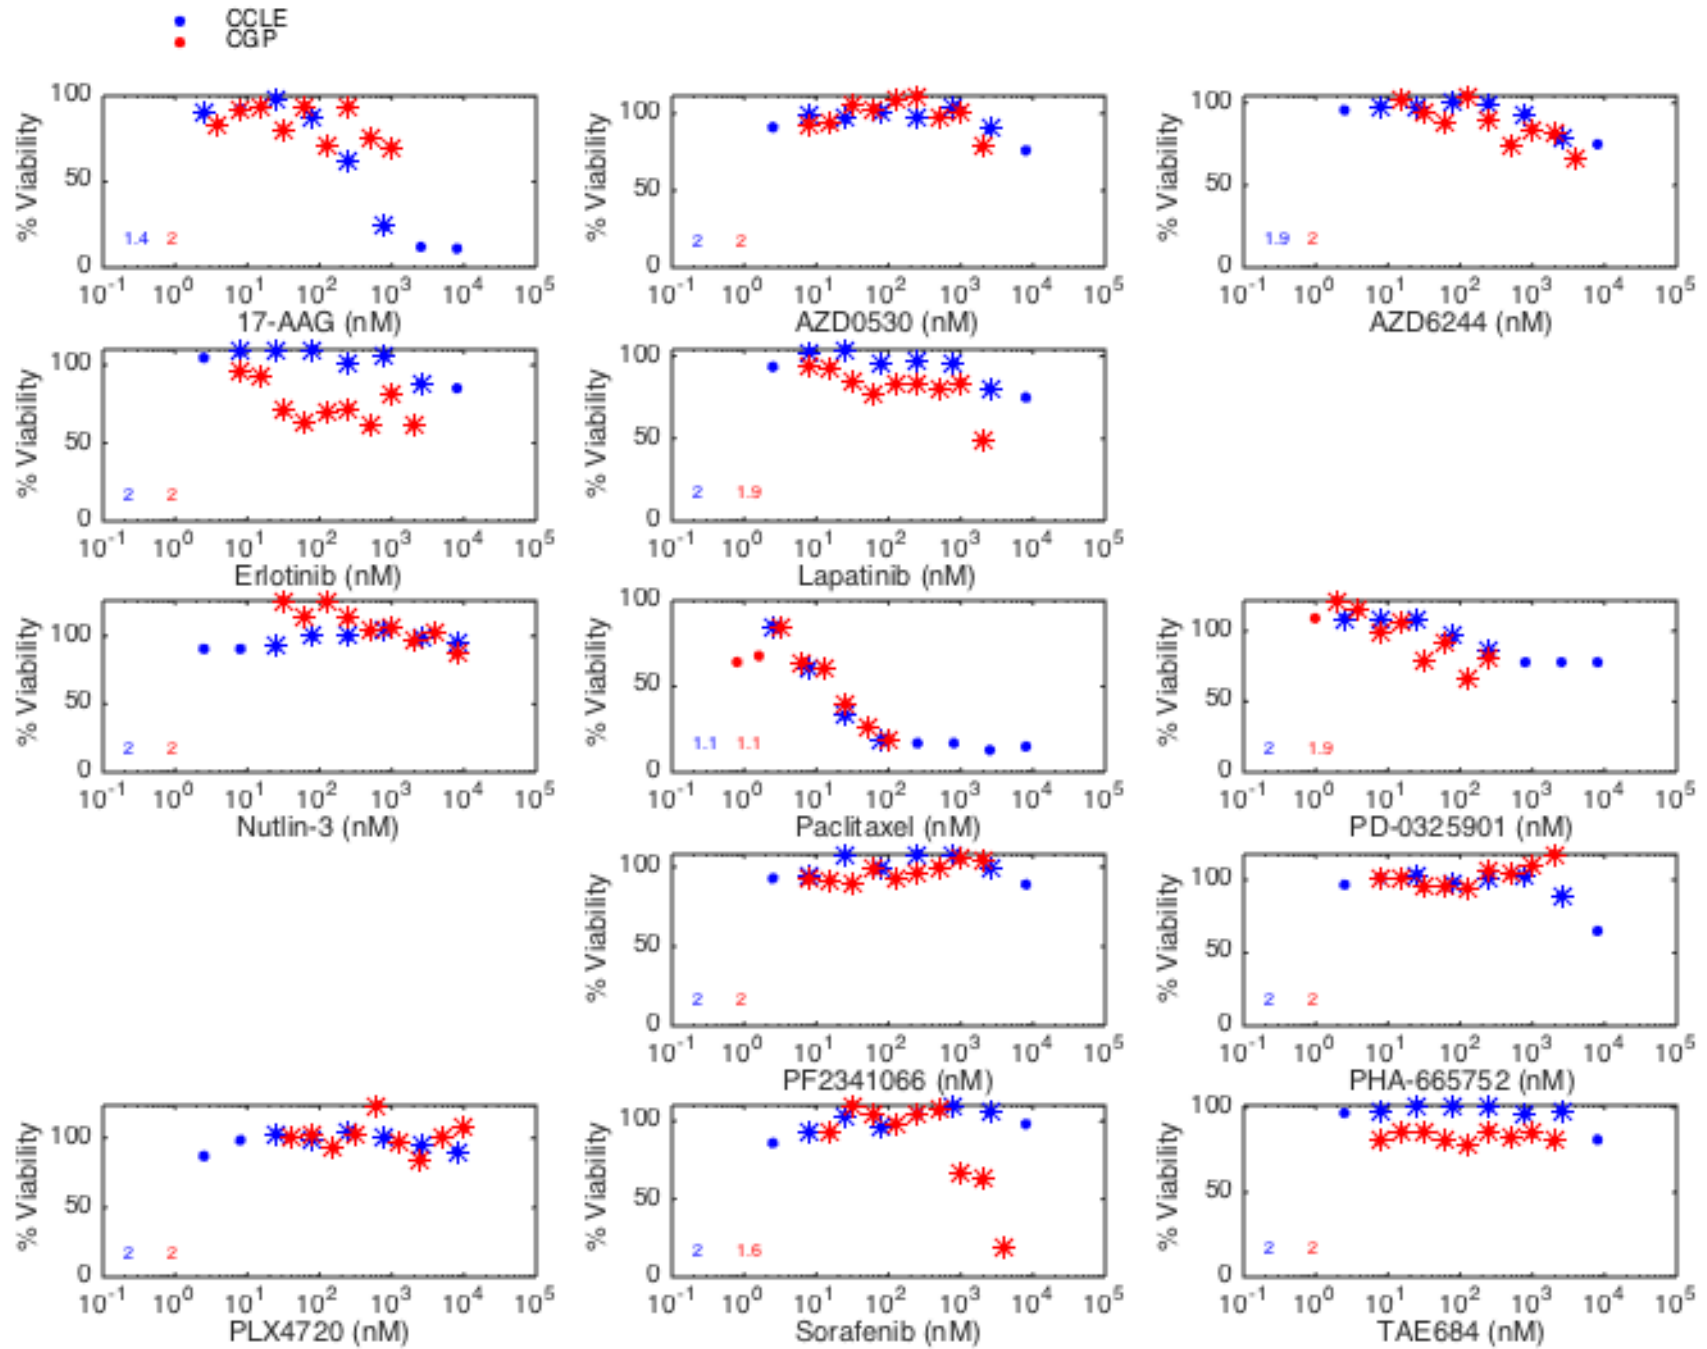

# TE-9

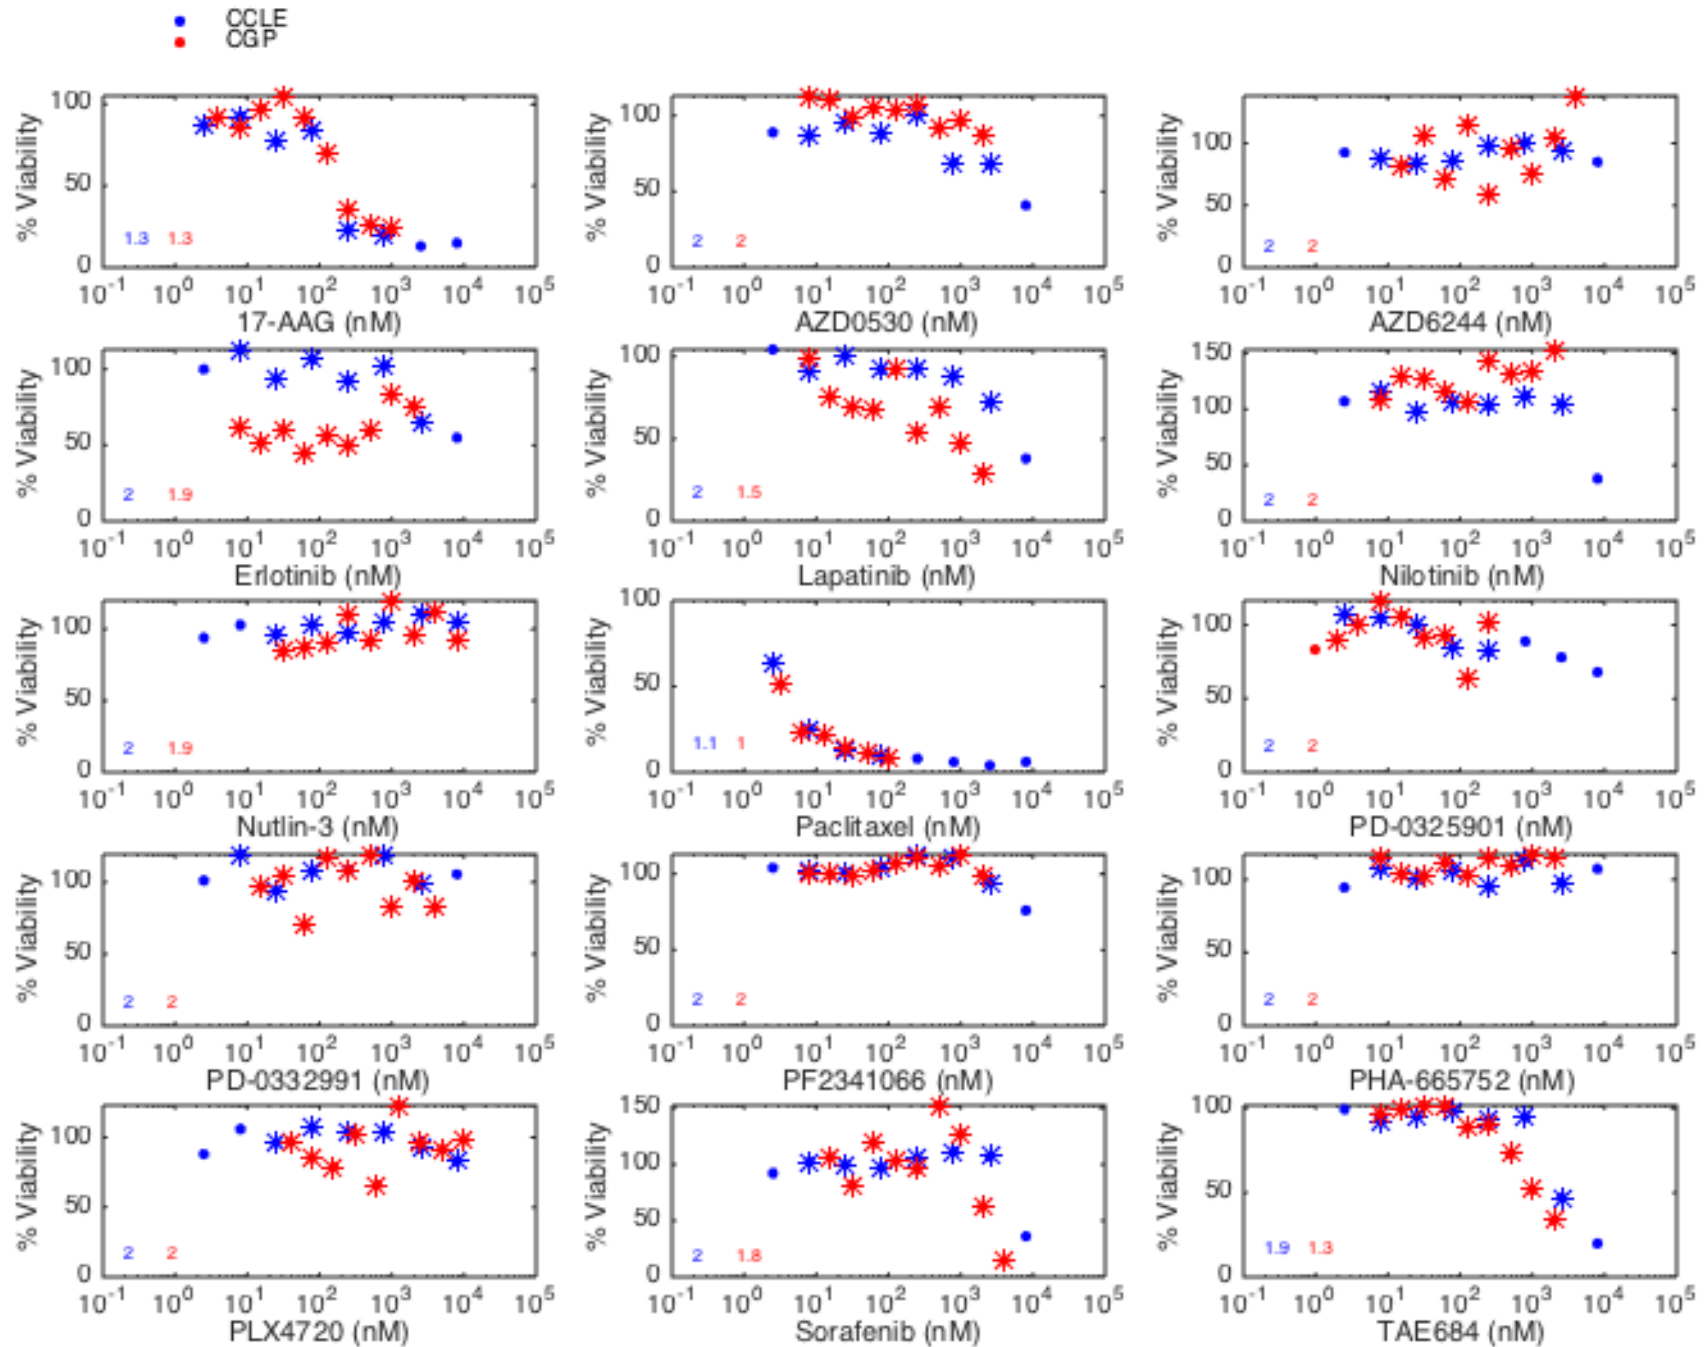

TE-11

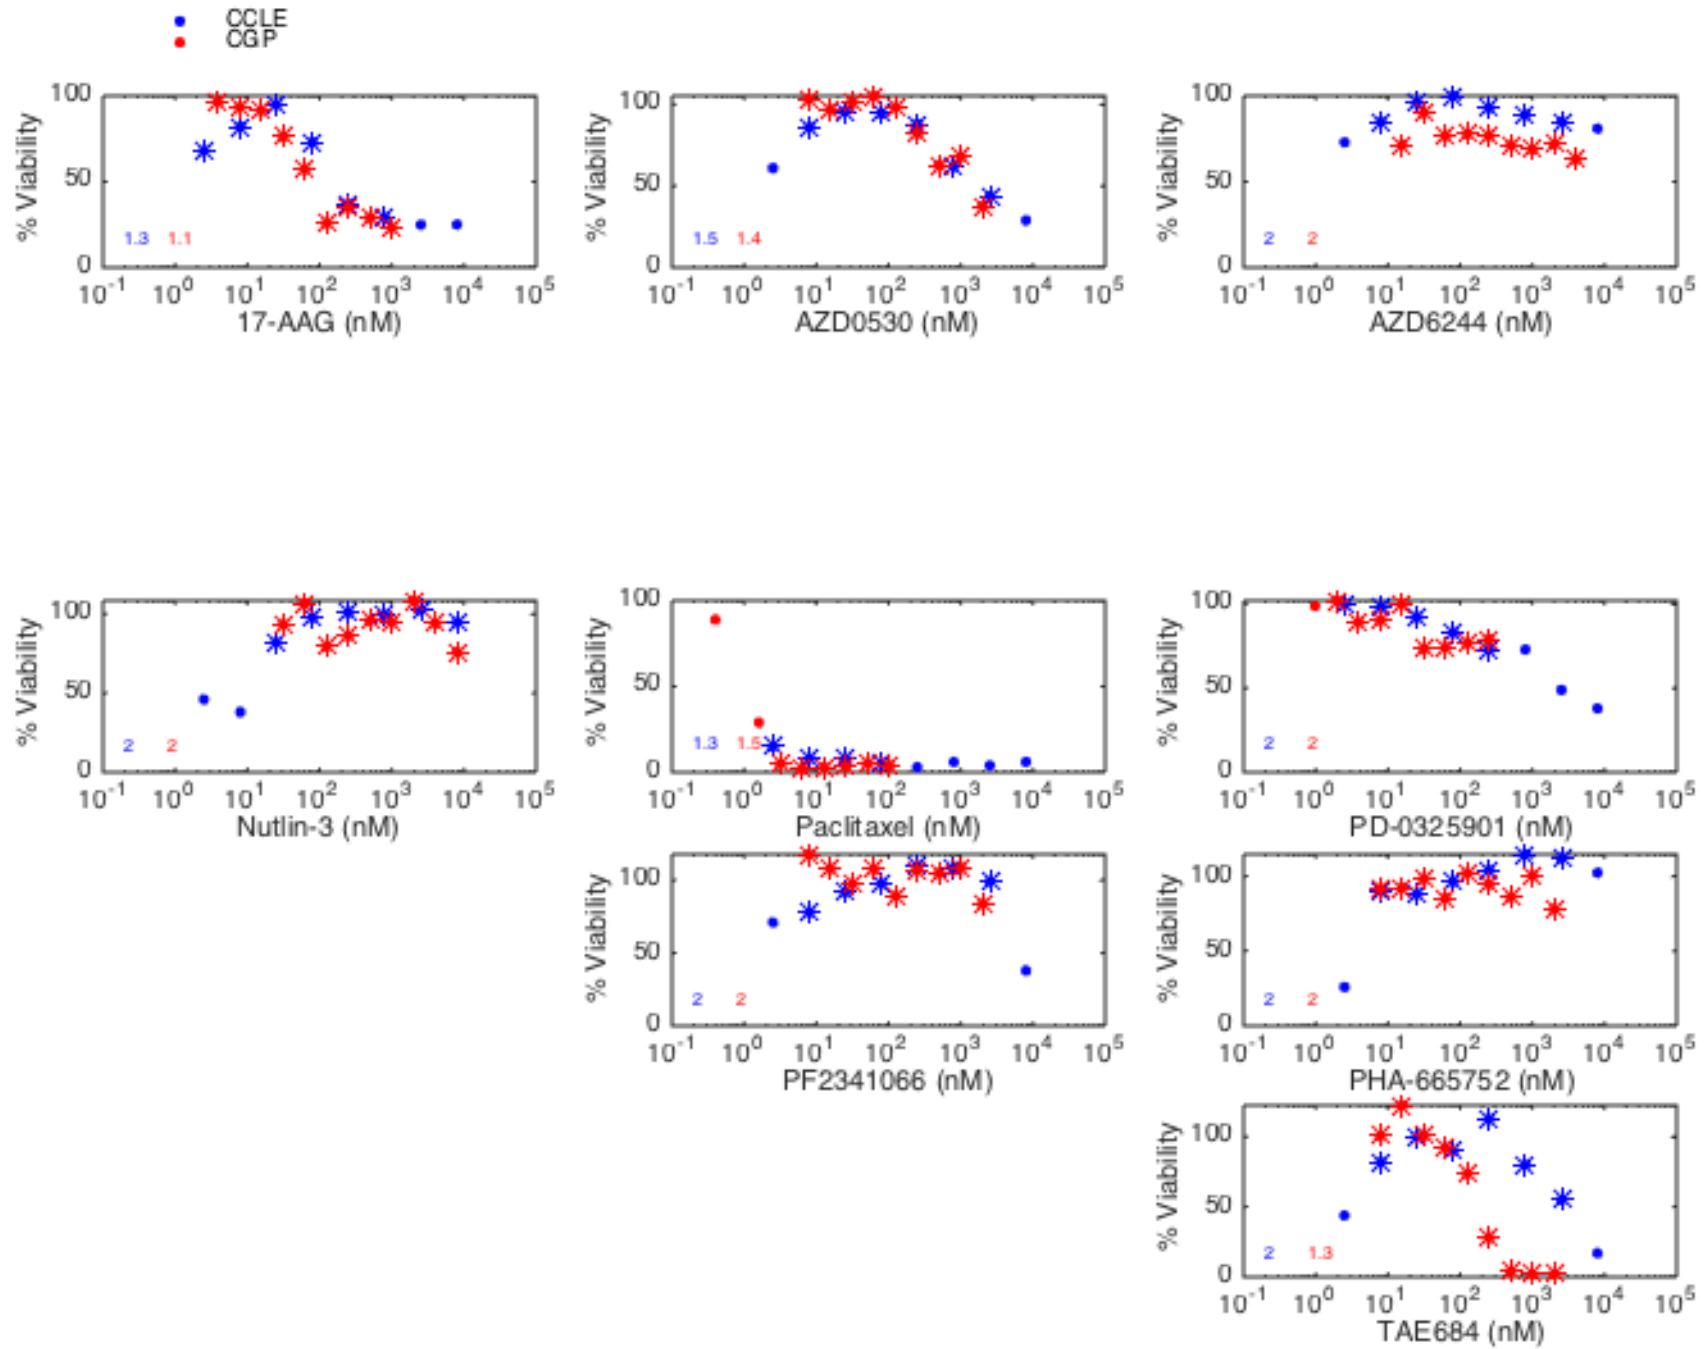

TE-15

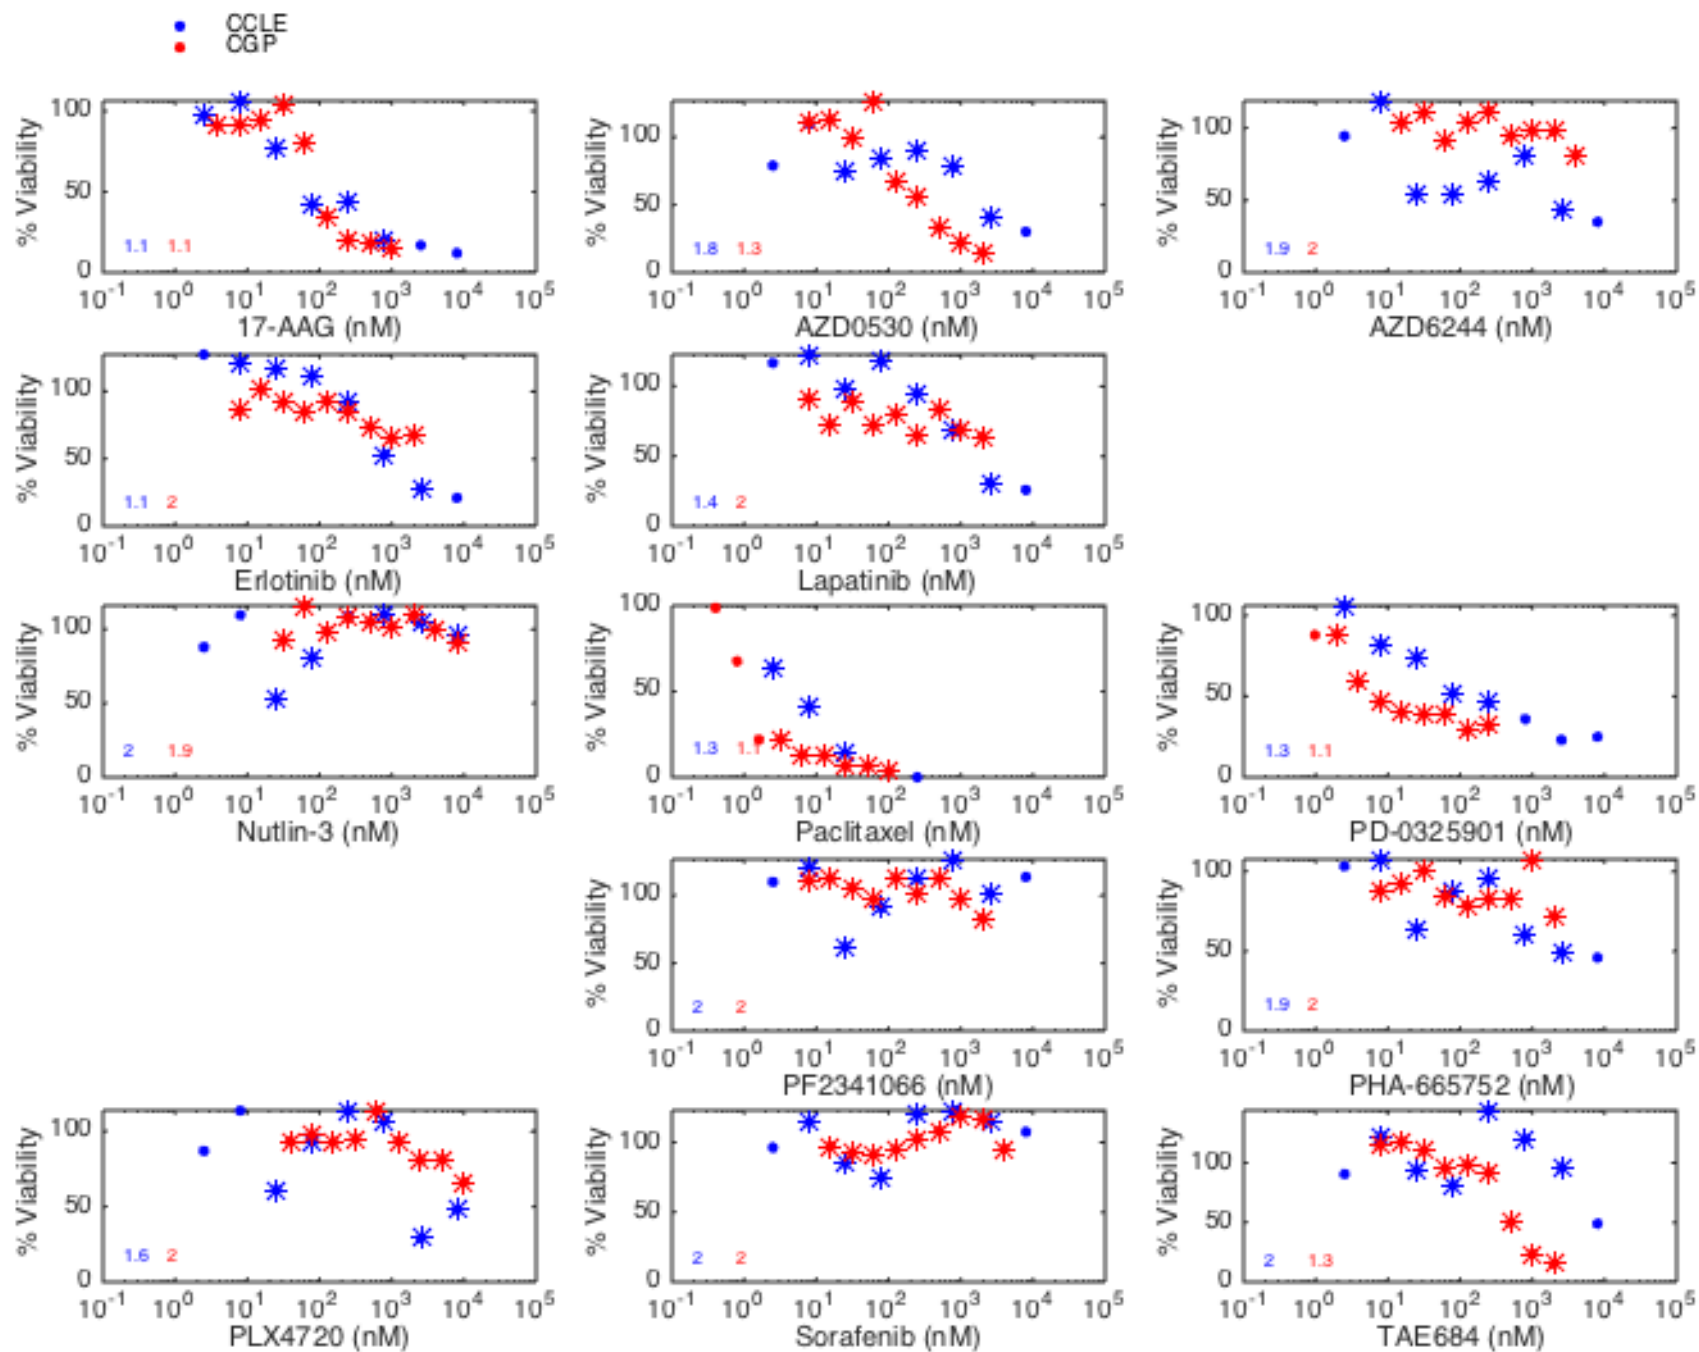

# TYK-nu

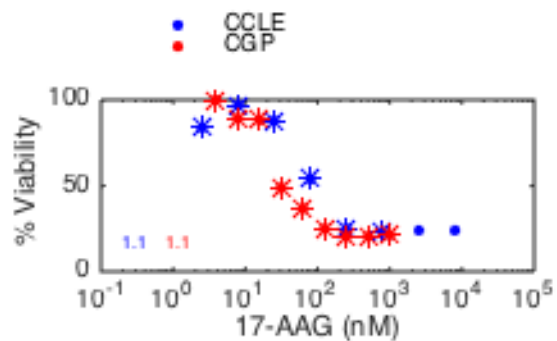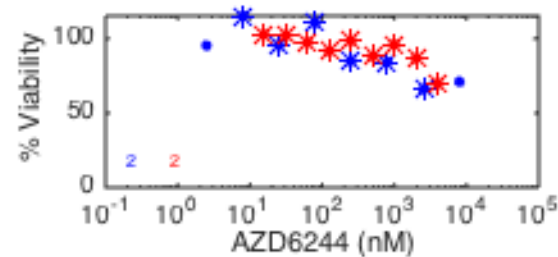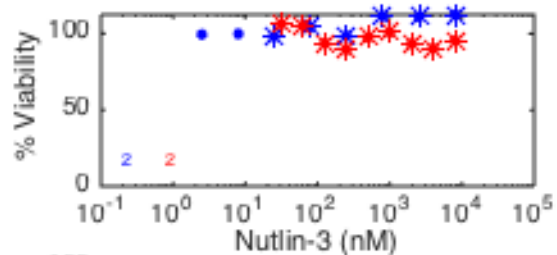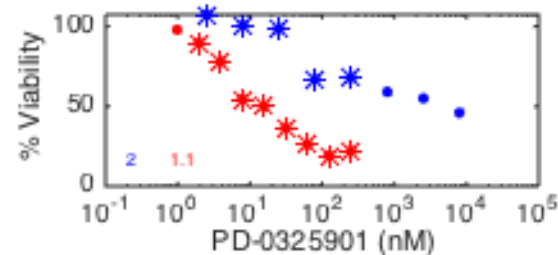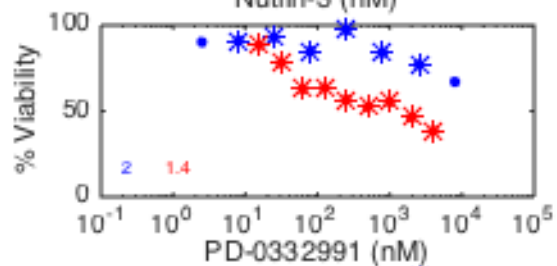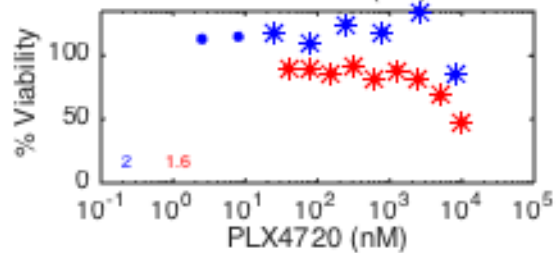

U-2-OS

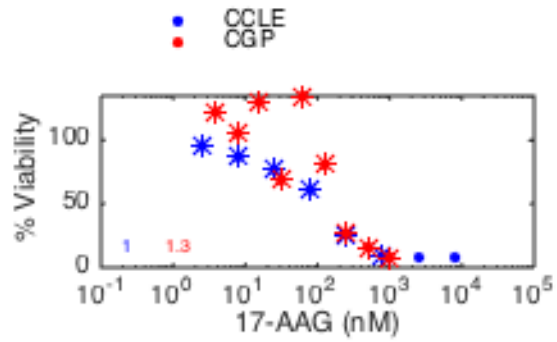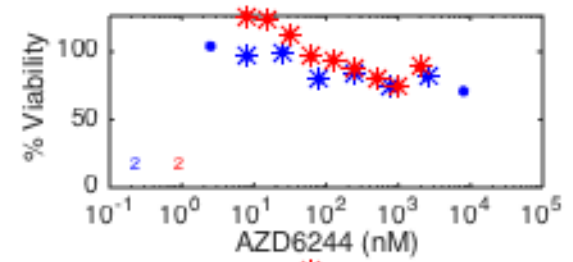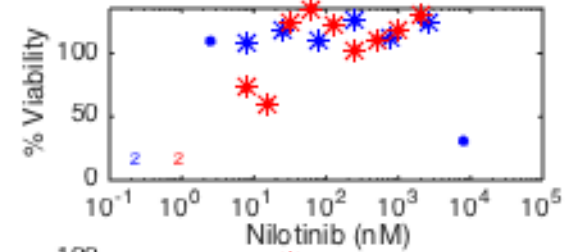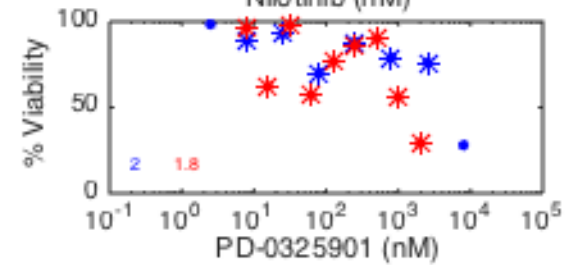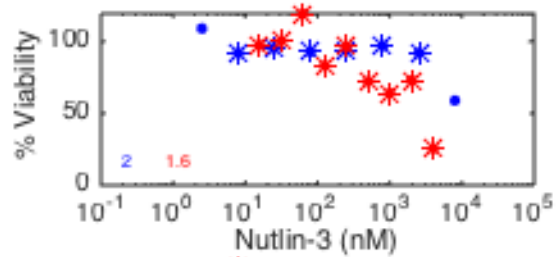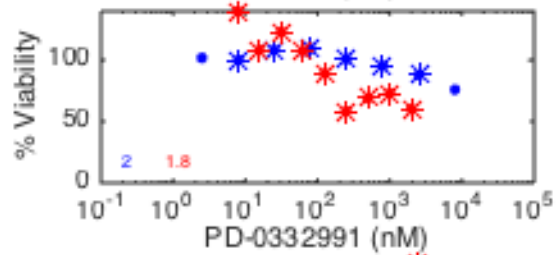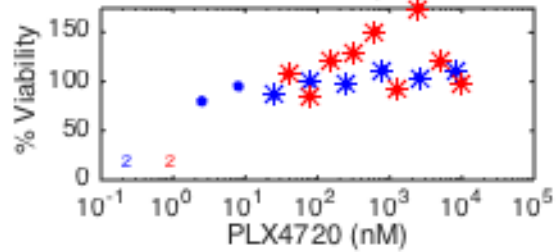

# U-87-MG

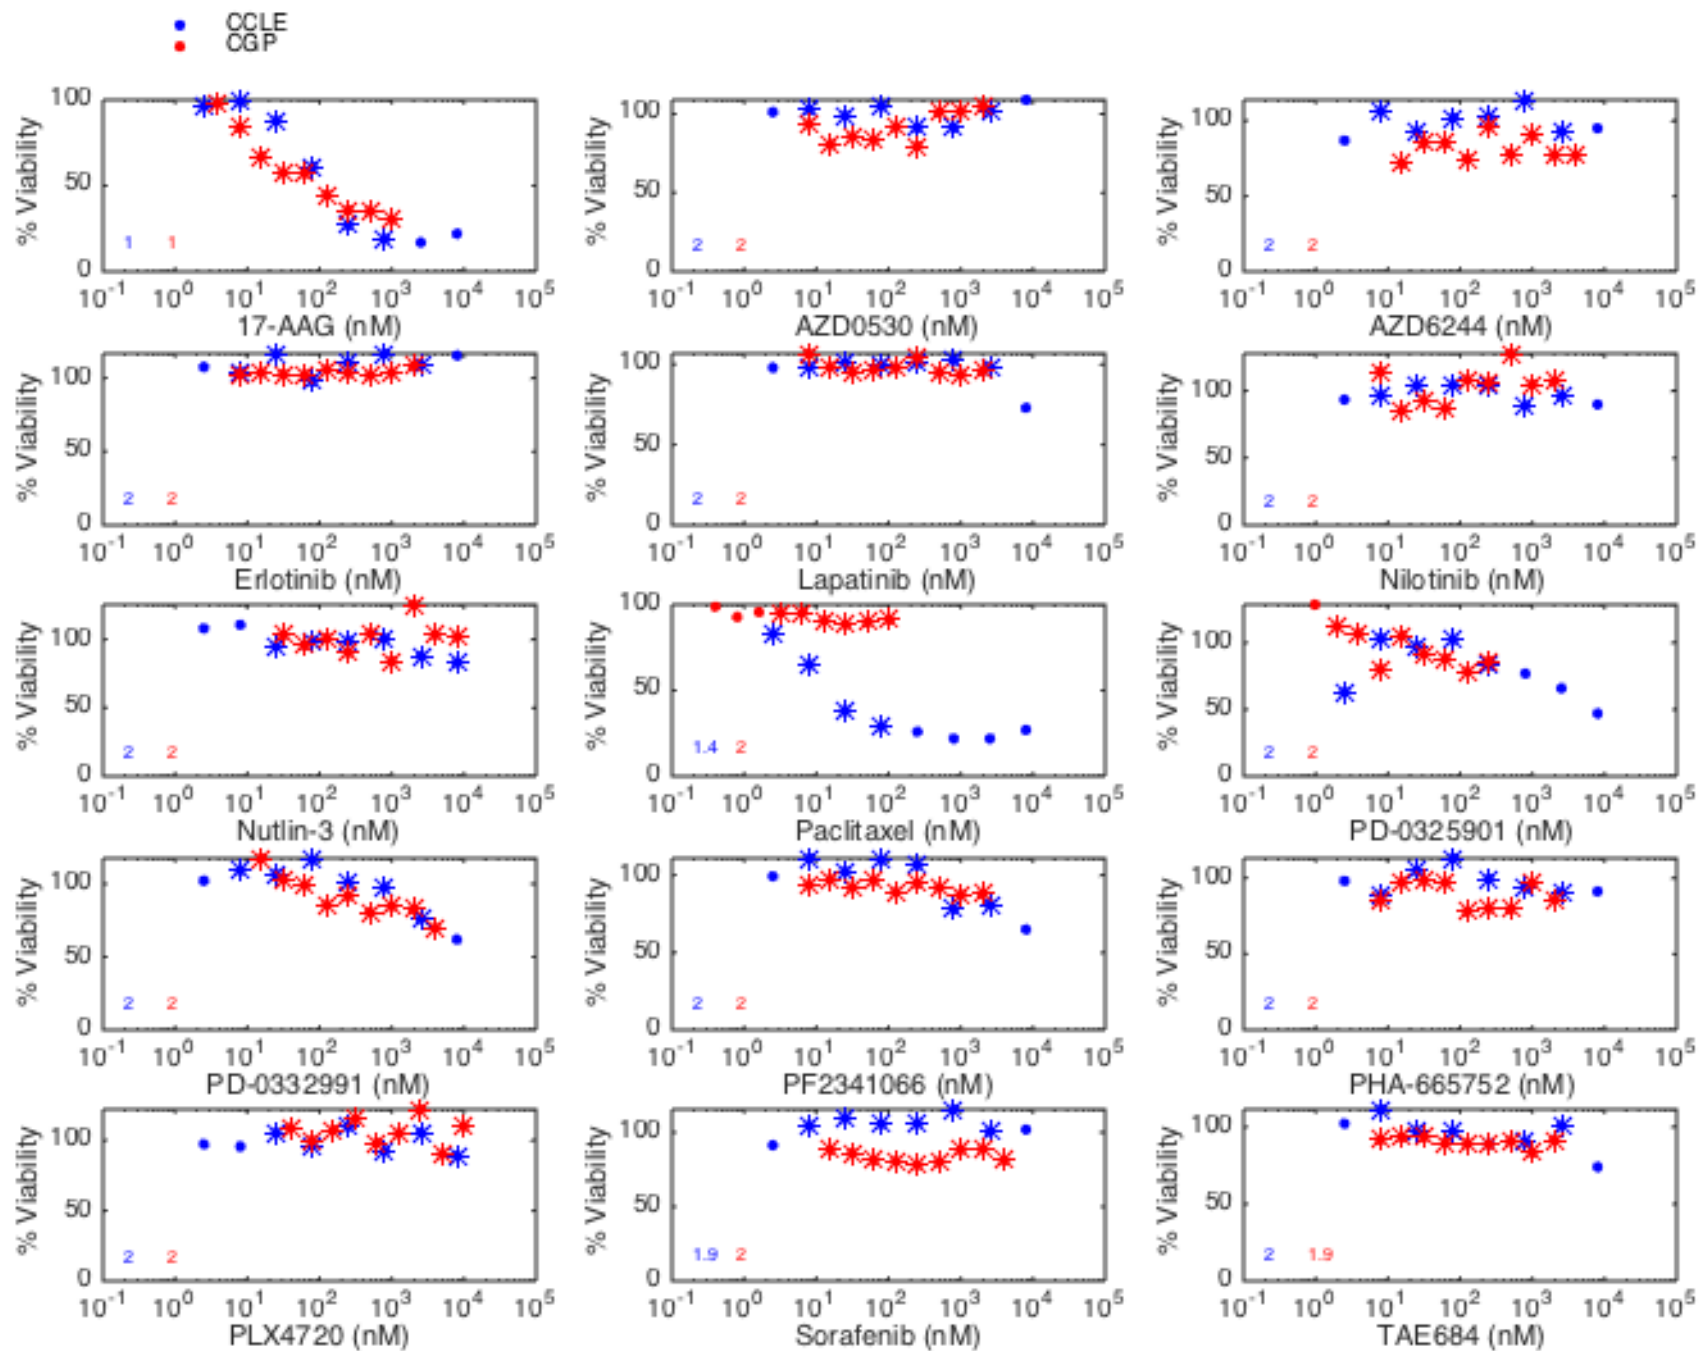

# U-118-MG

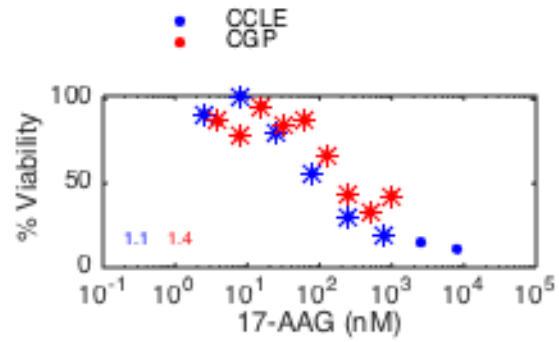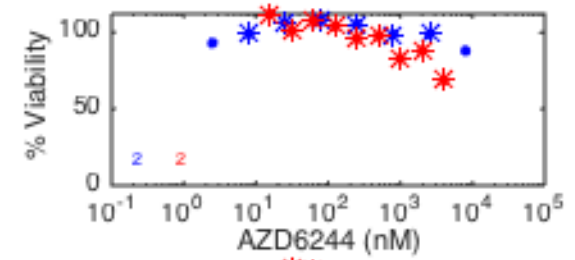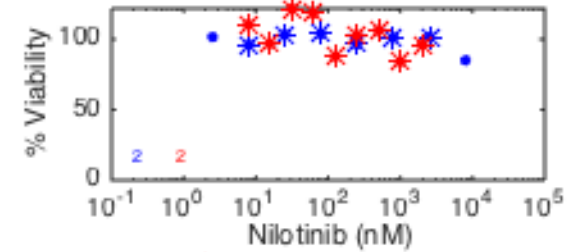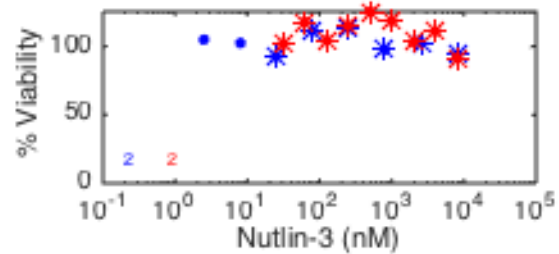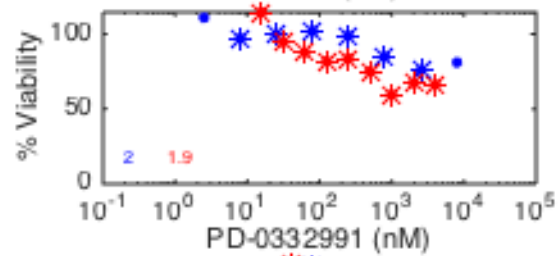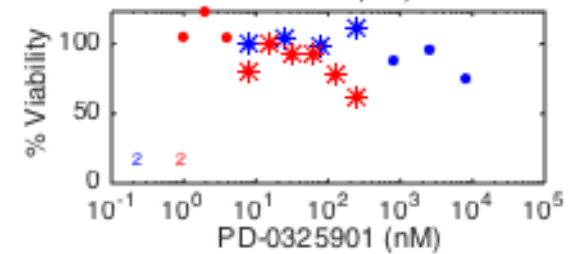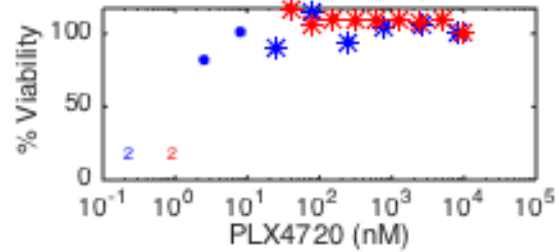



# UACC-62

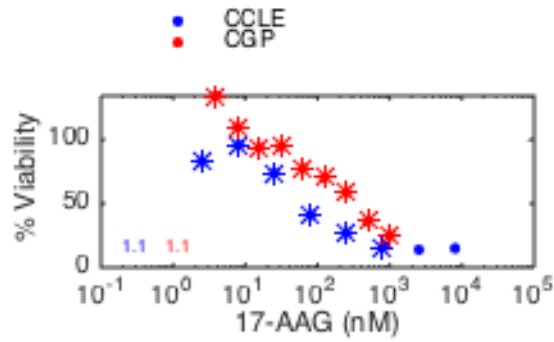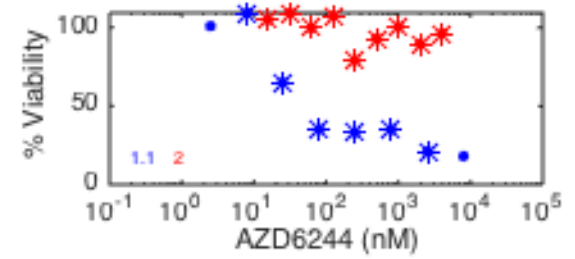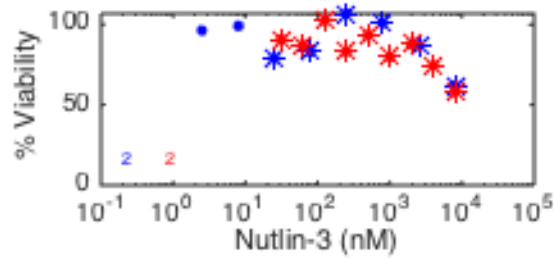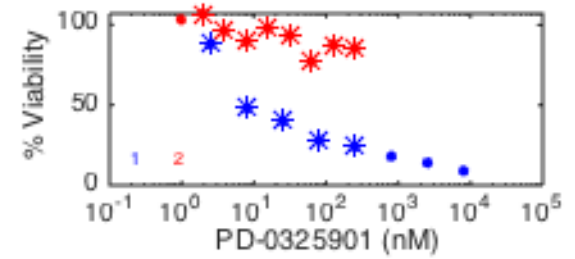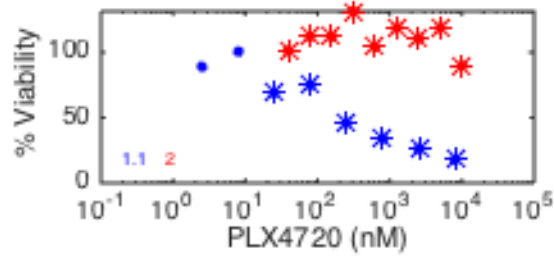

# UACC-257

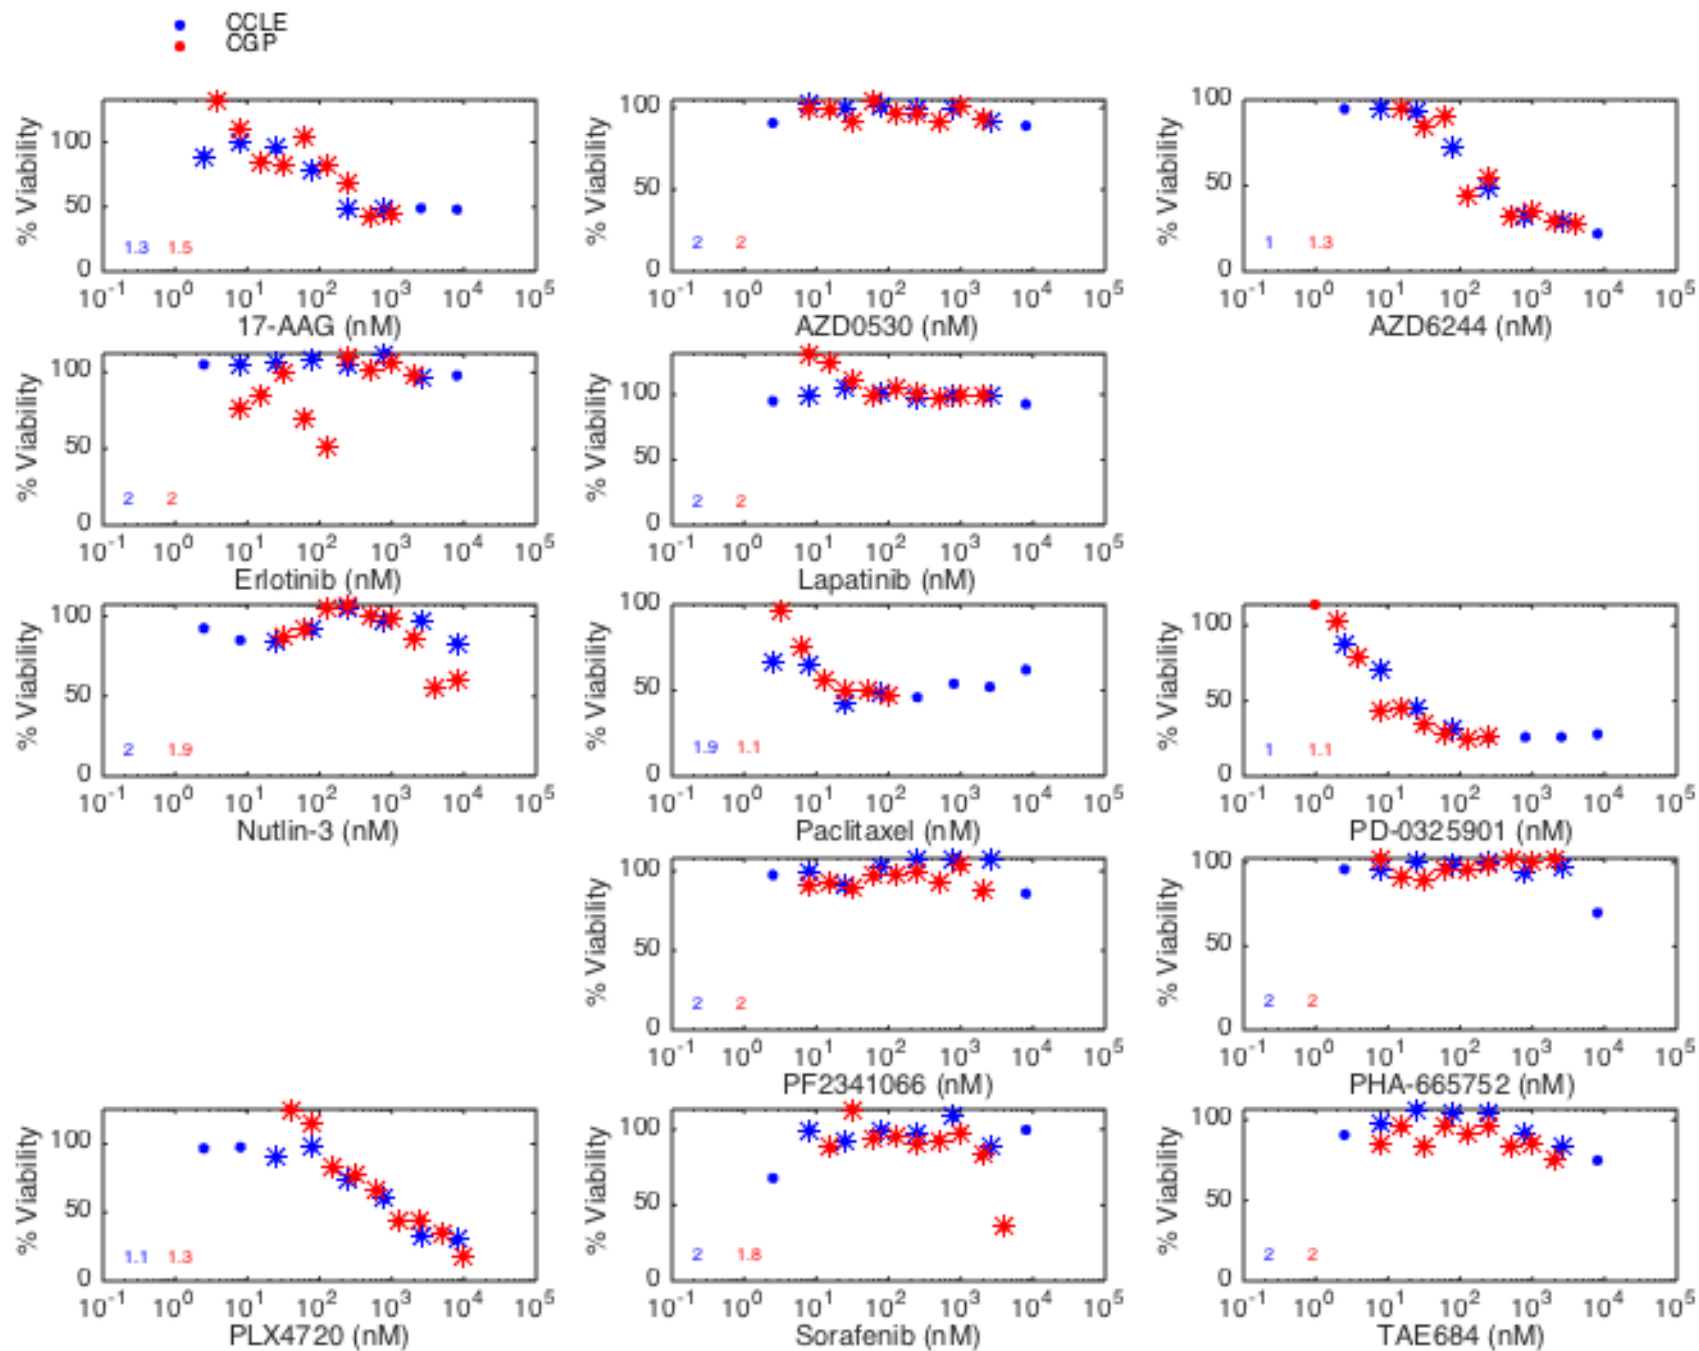

# UACC-812

● CCLE  
● CGP

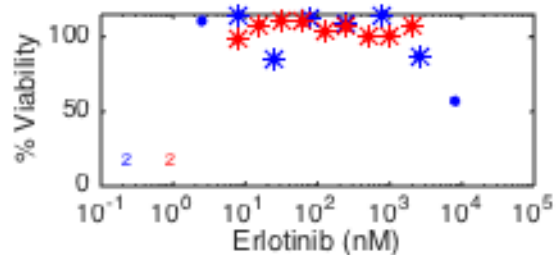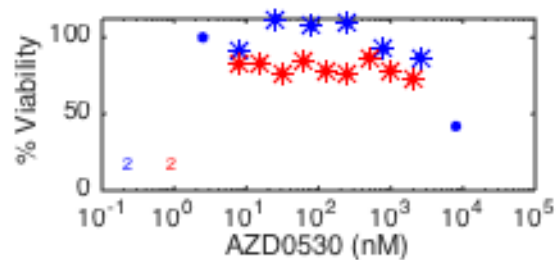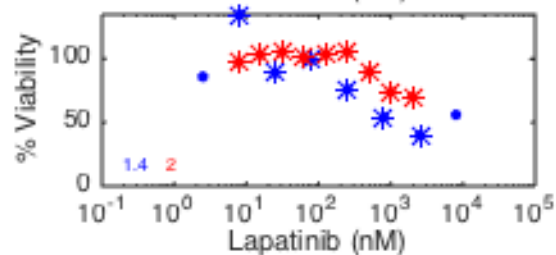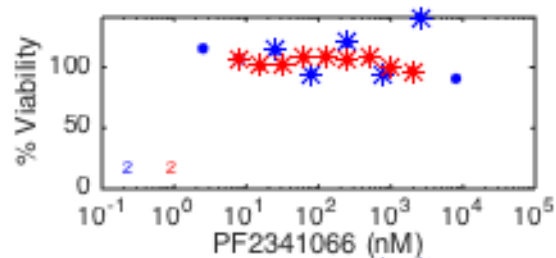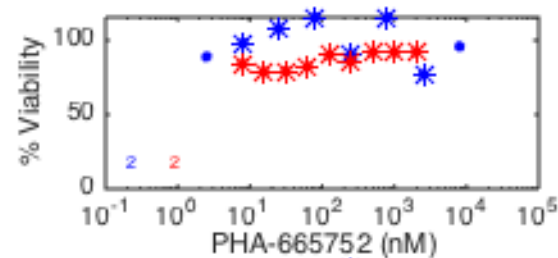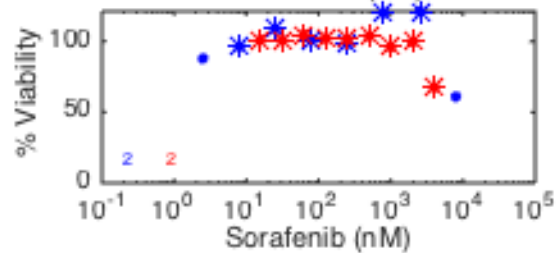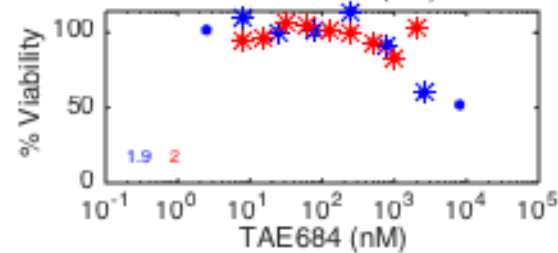

# UM-UC-3

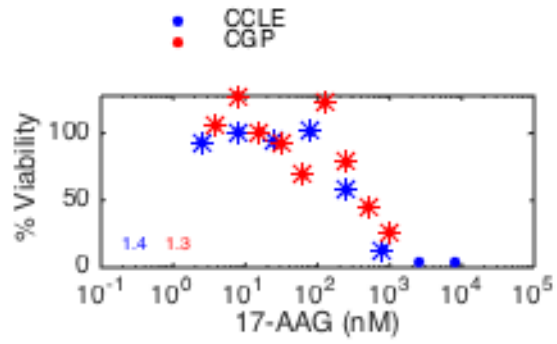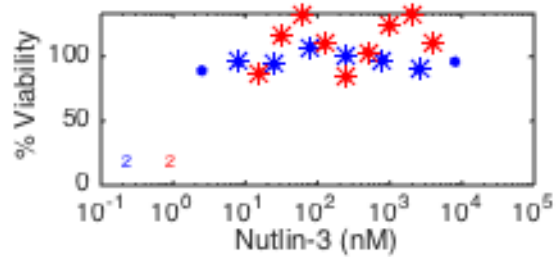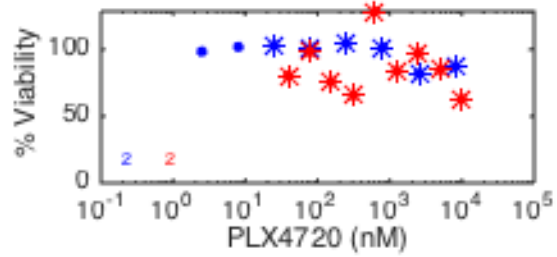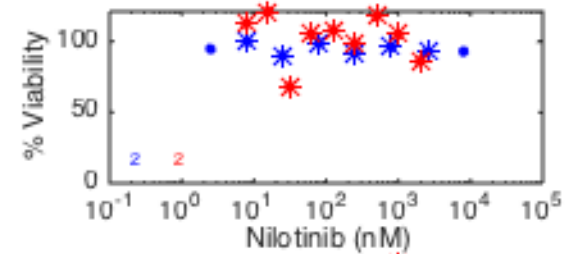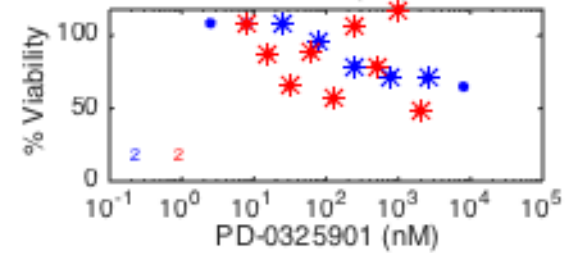

# VMRC-RCZ

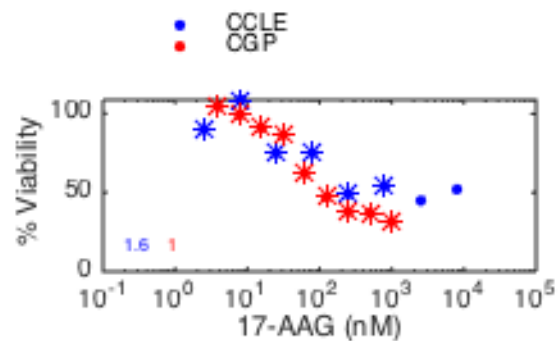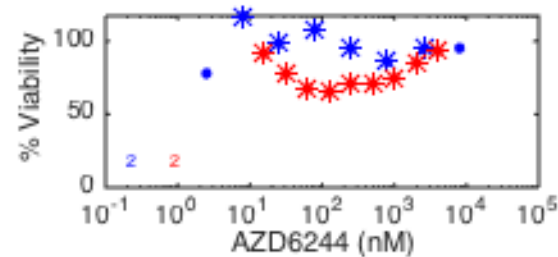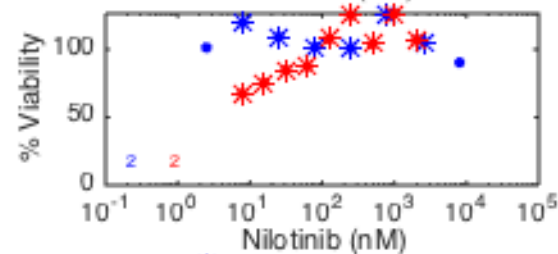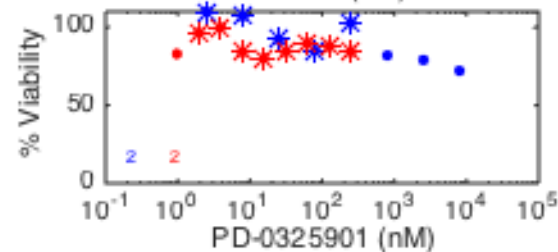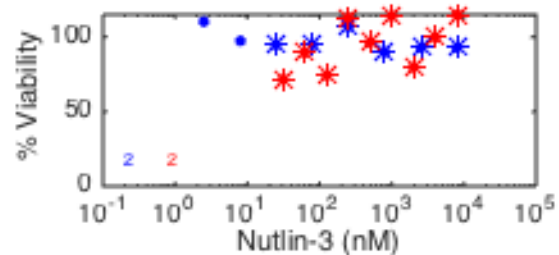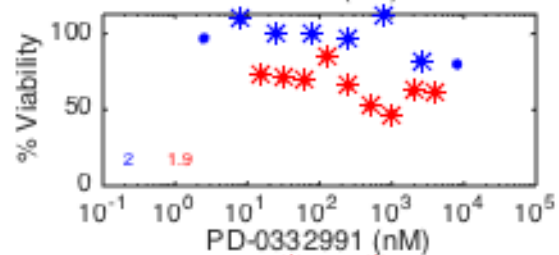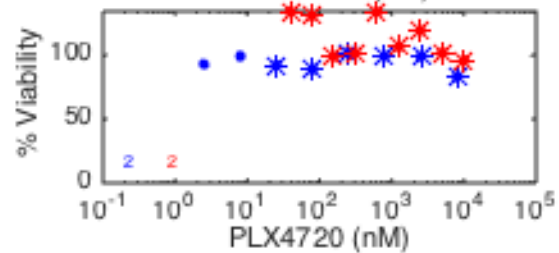

WM-115

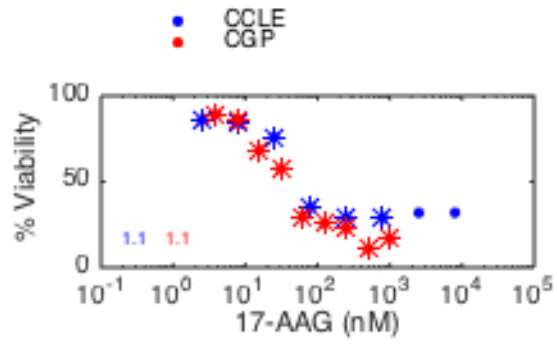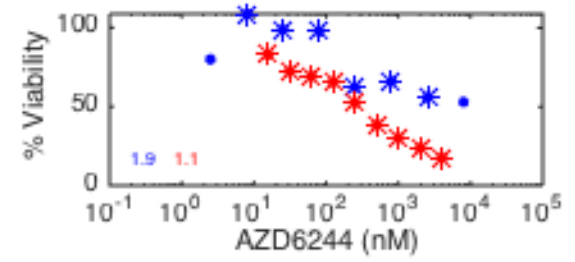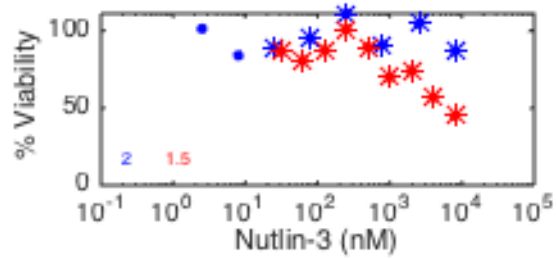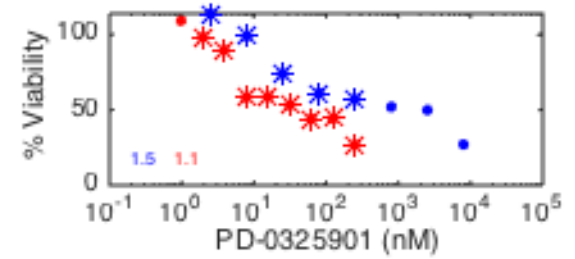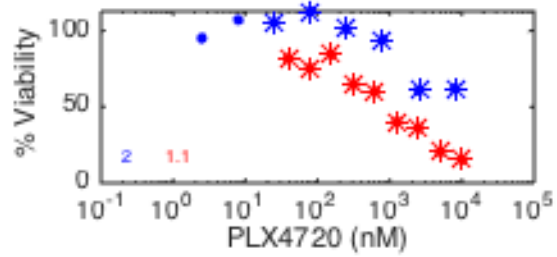

# YKG-1

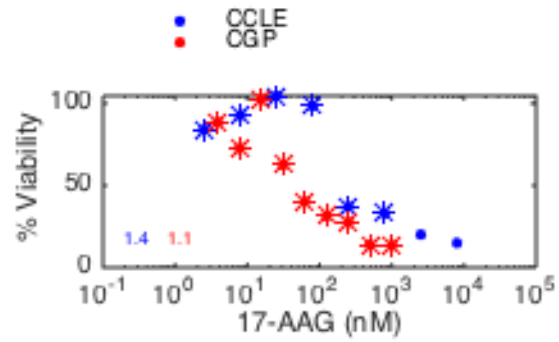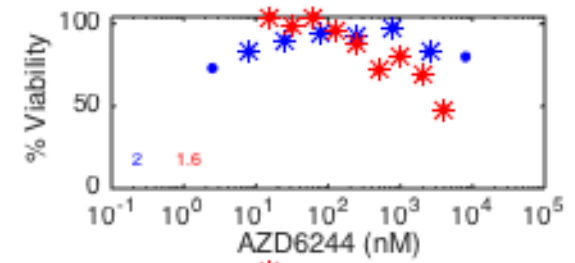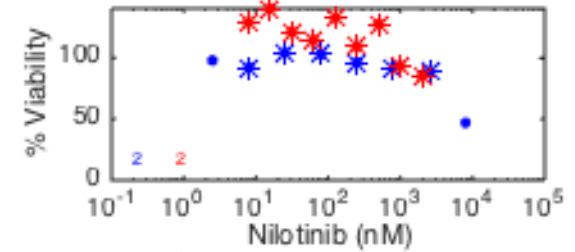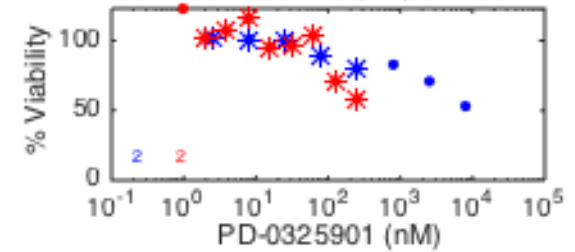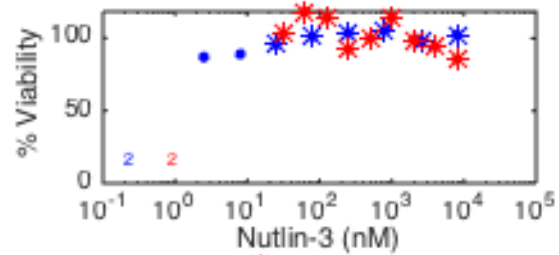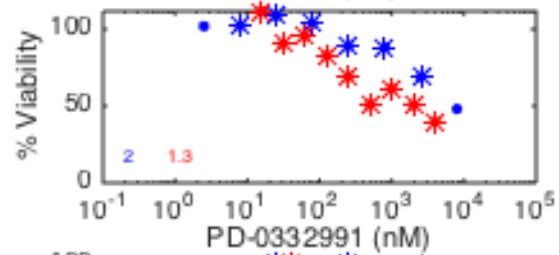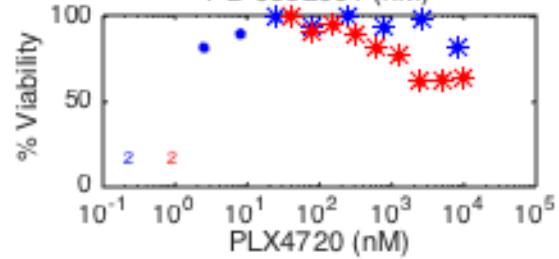

ZR-75-30

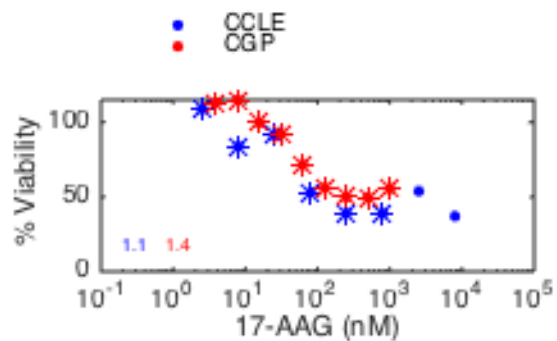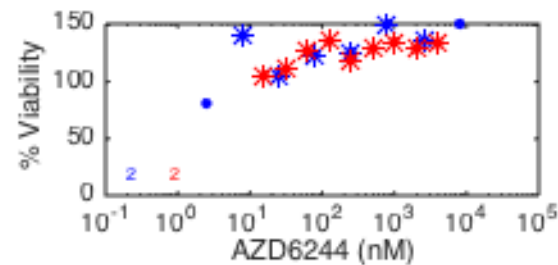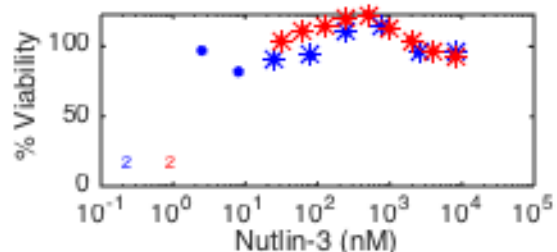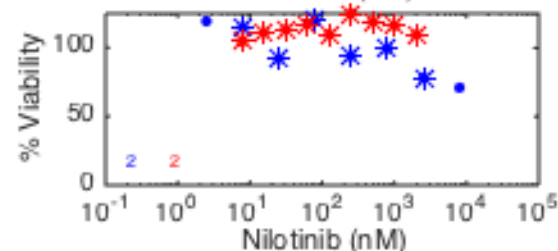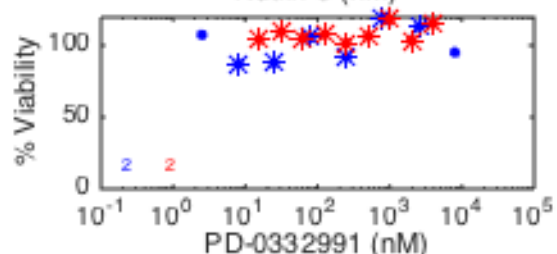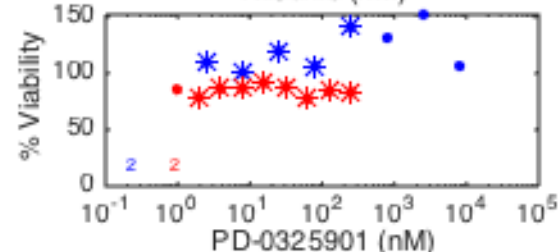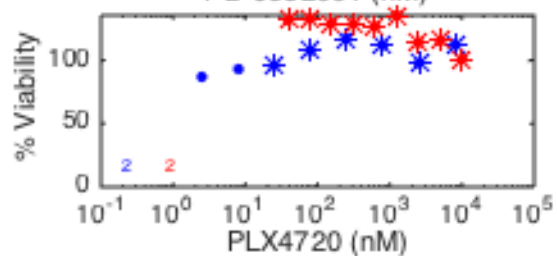

Supplement: NIHMS888276-supplement-Documents.pdf [file NIHMS888276-supplement-Documents.pdf]
