# Supplementary material
Source: PubMed Central journal article supplement (PMC5554885)

**Discrepantly classified dose response curves.** Dose response curves from drug/ cell line pairs that were discrepant in terms of sensitivity classification. Only data in shared dose range is shown. Red dots are CGP, blue are CCLE.

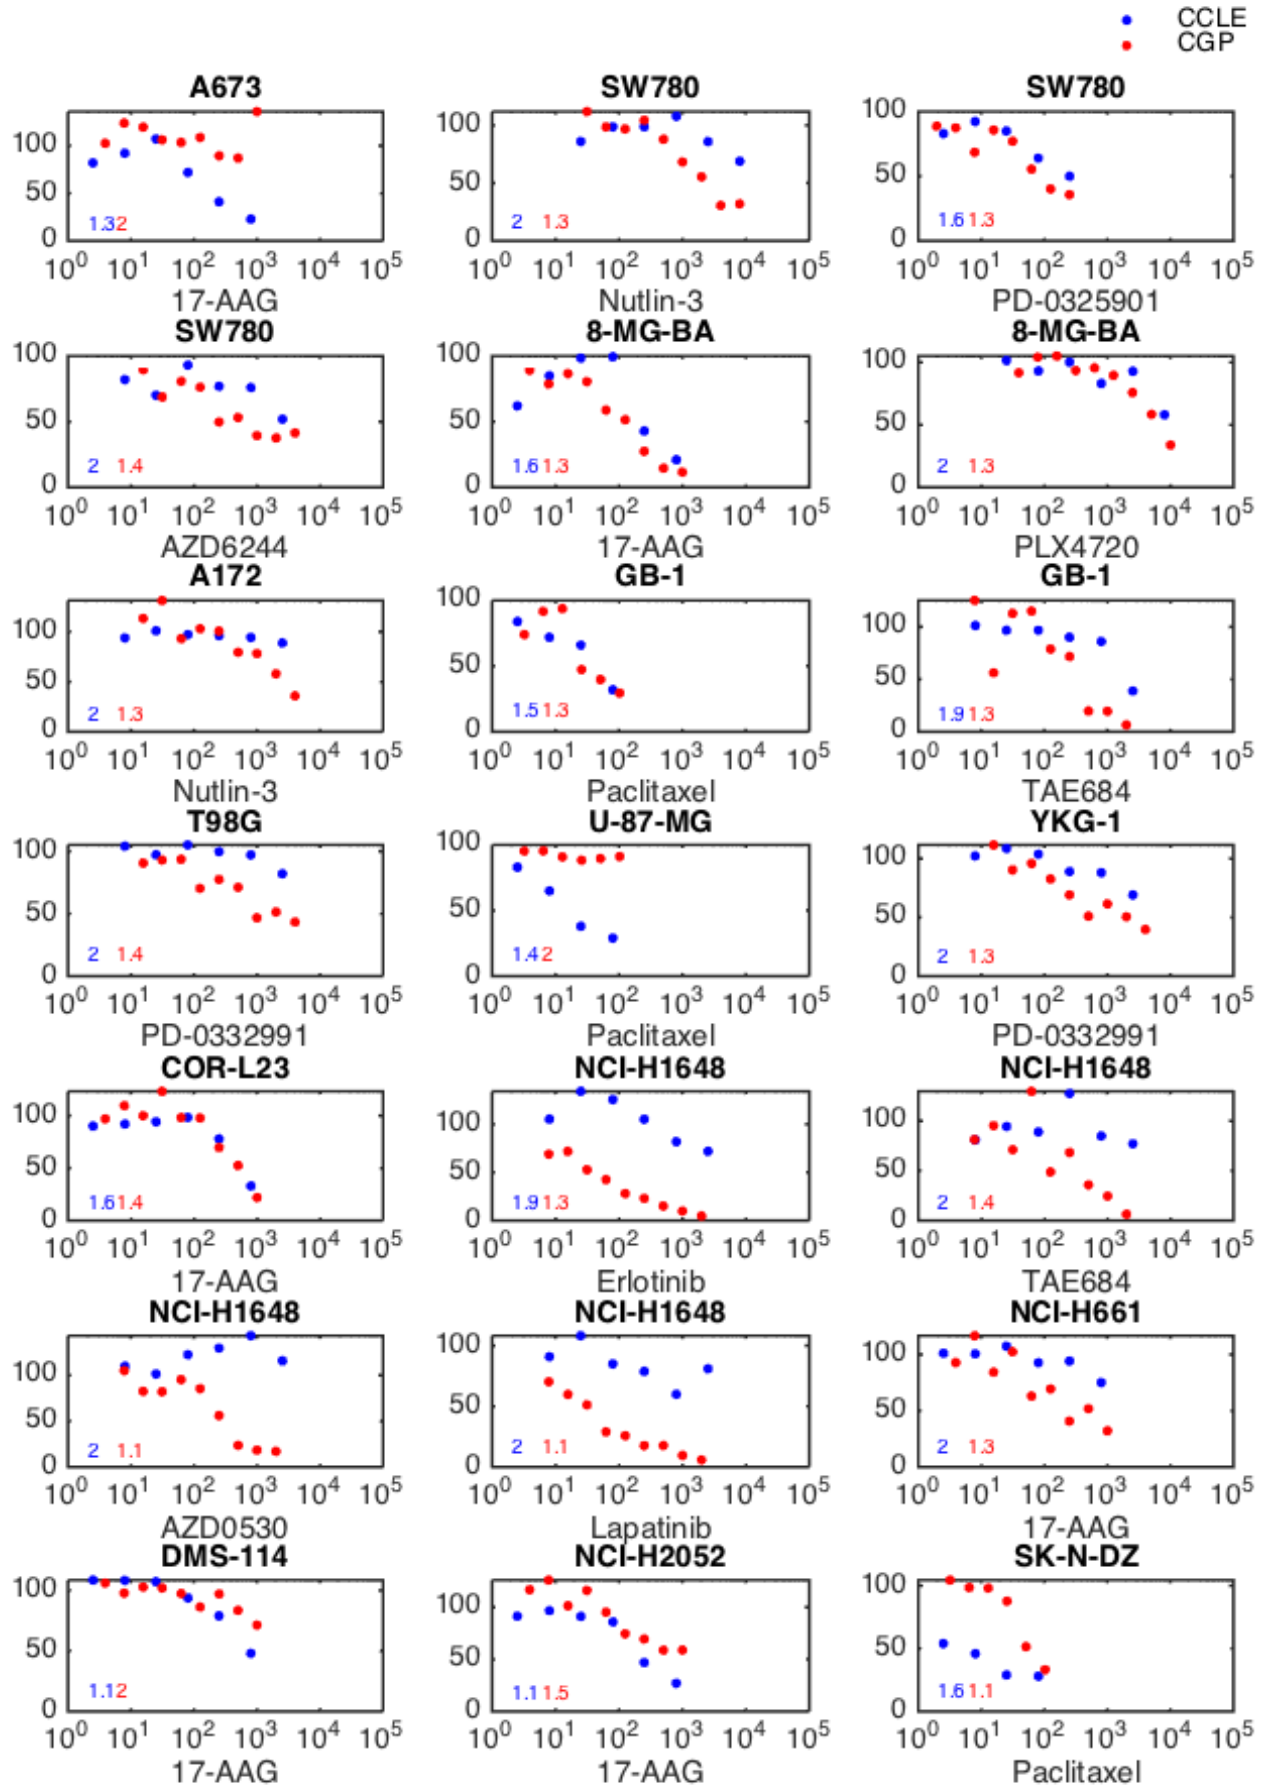

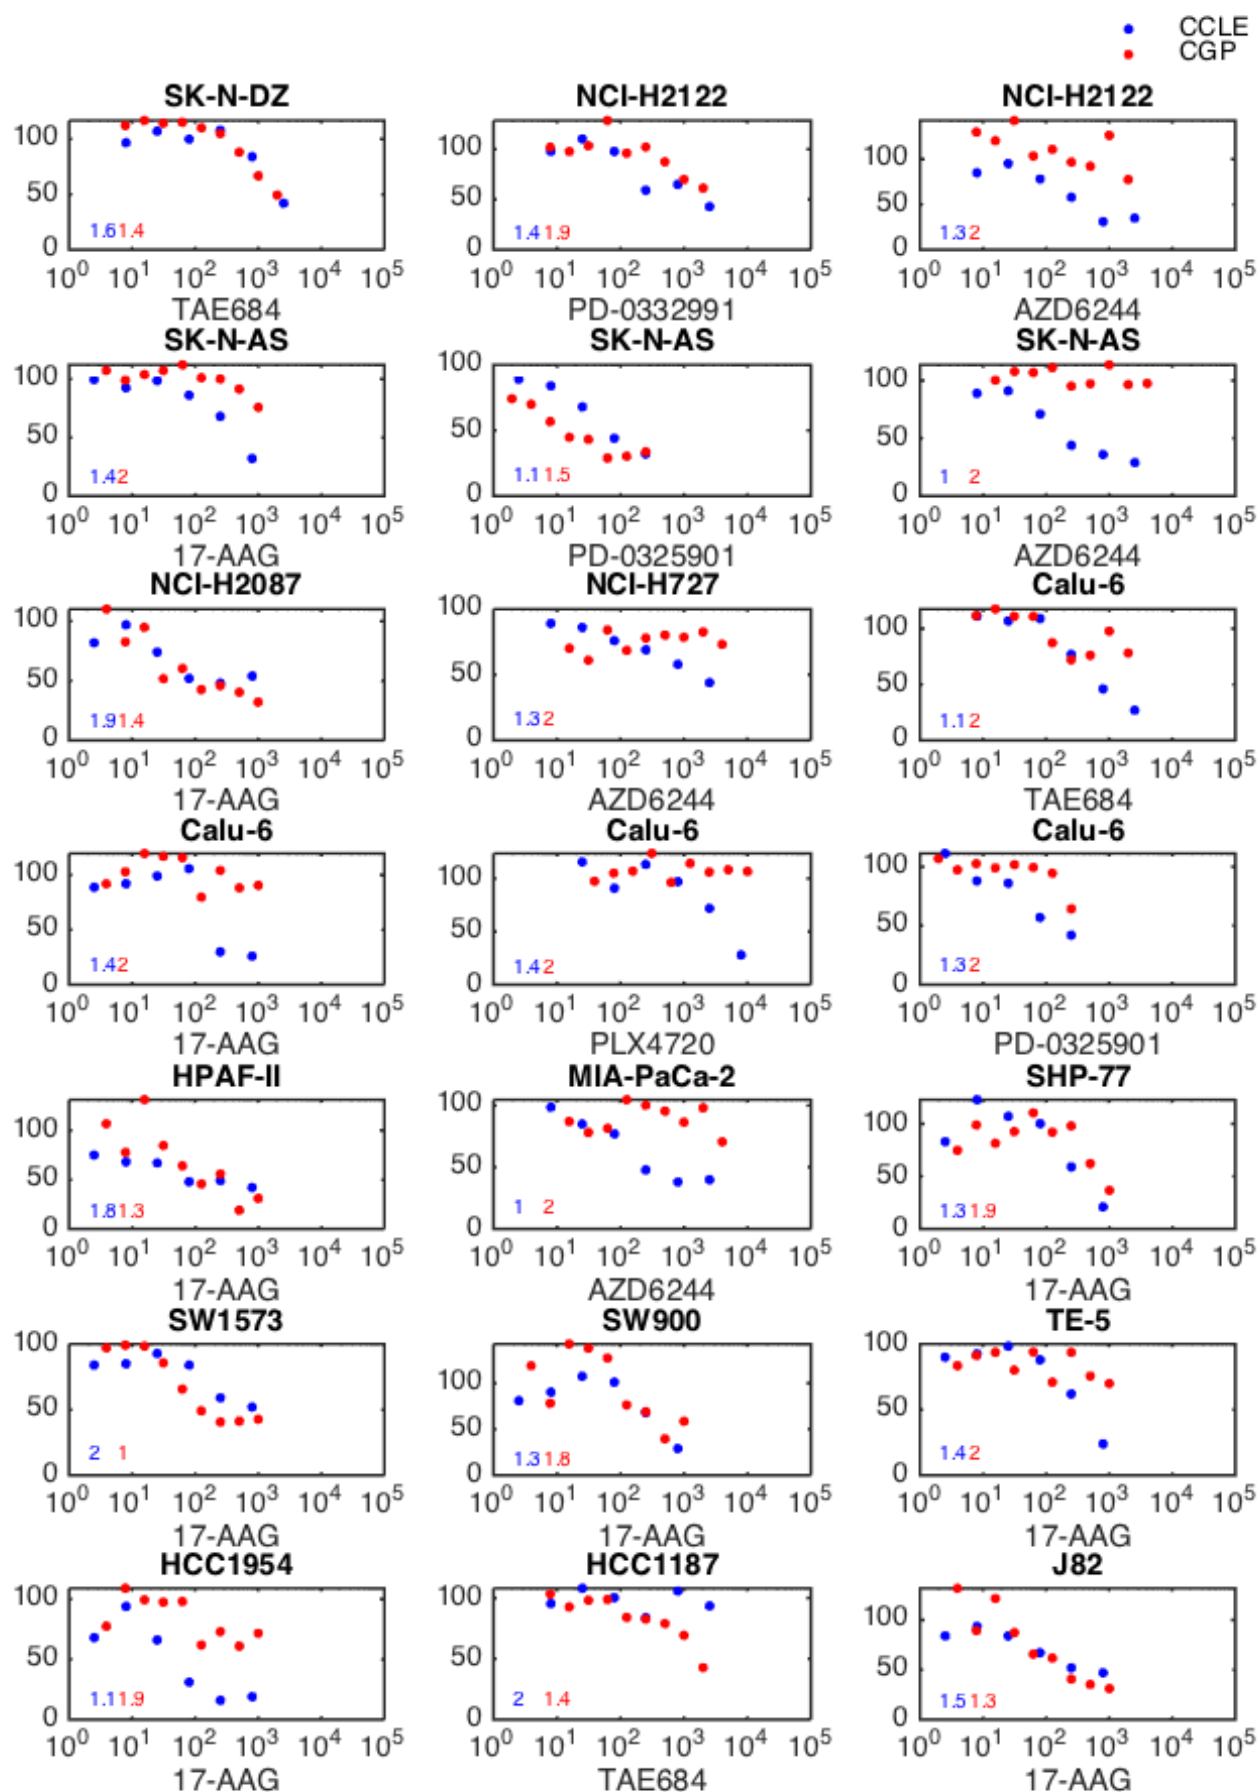

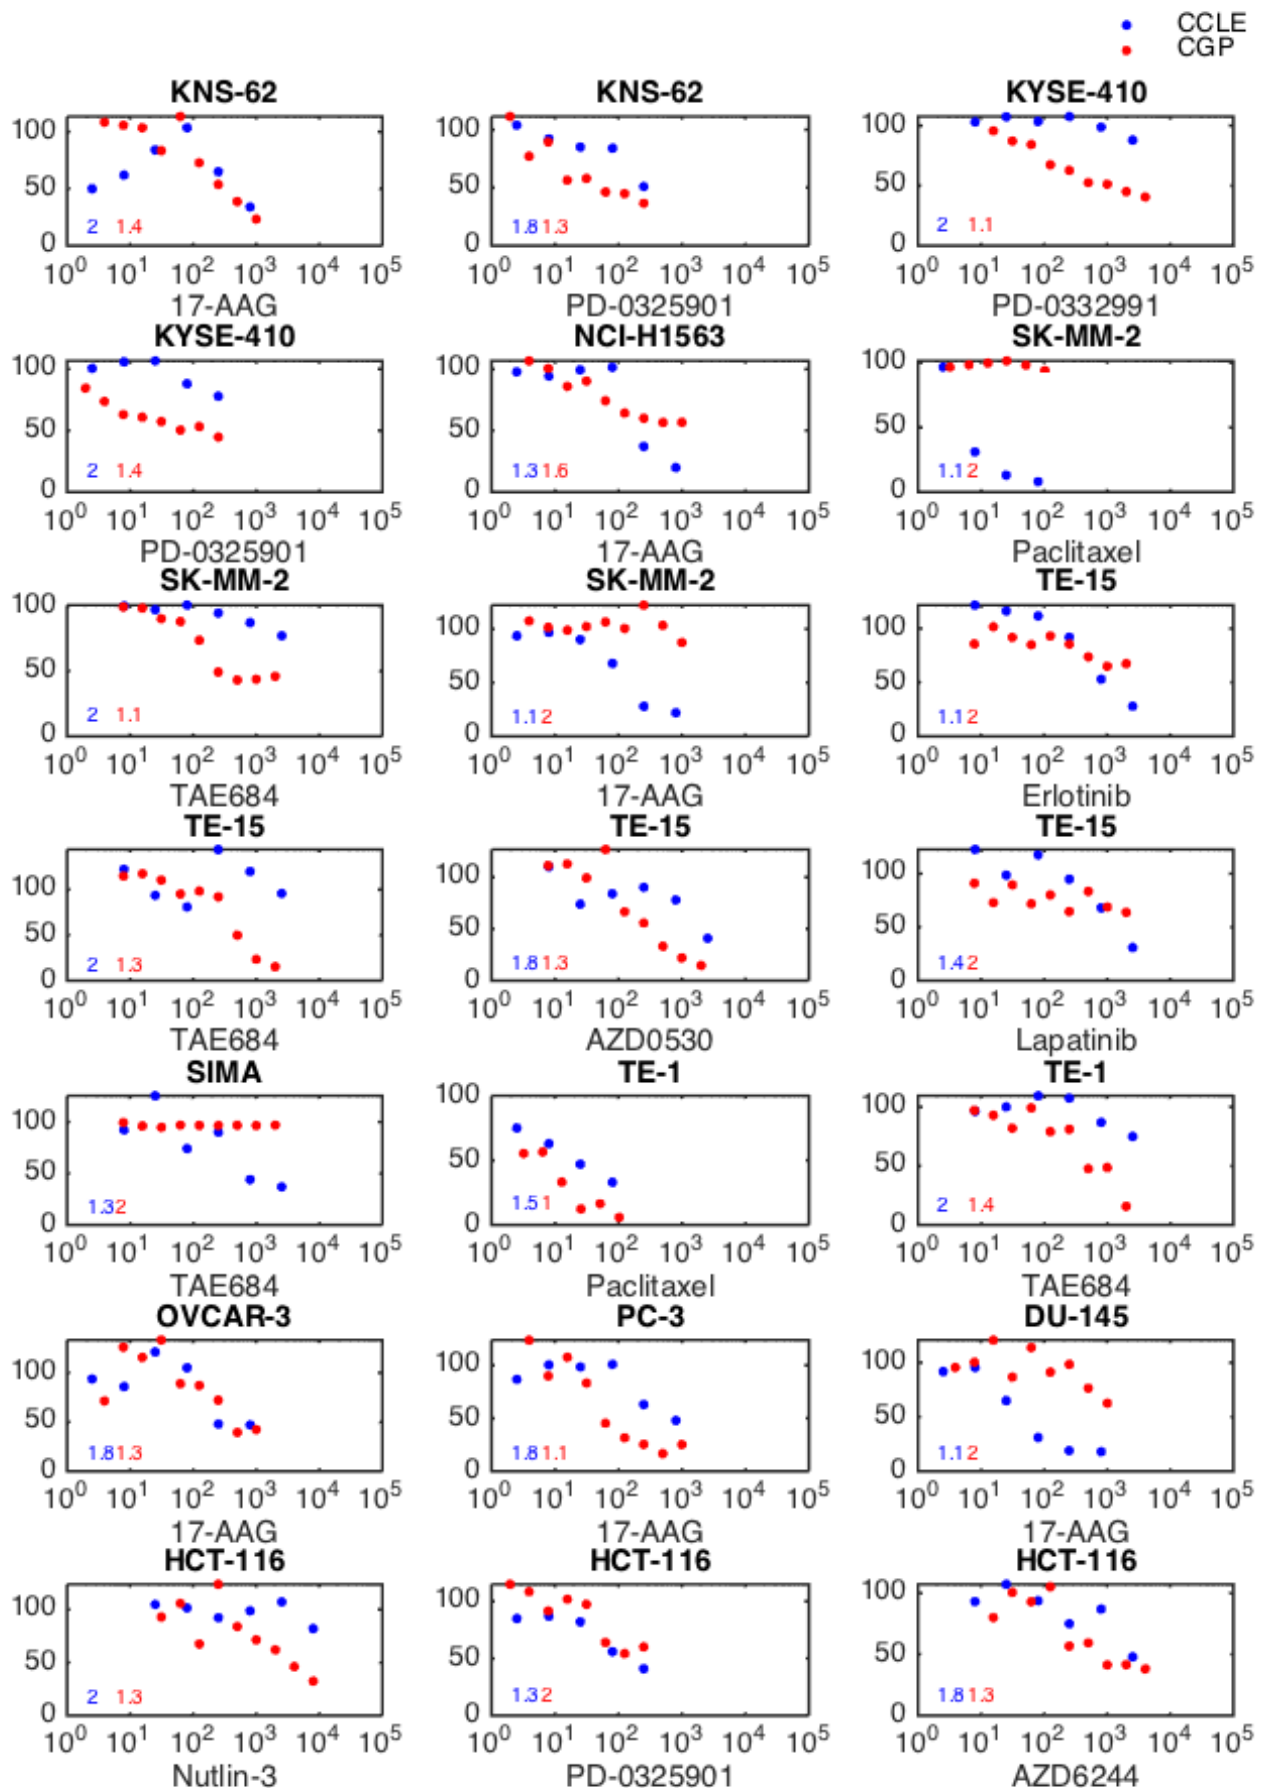

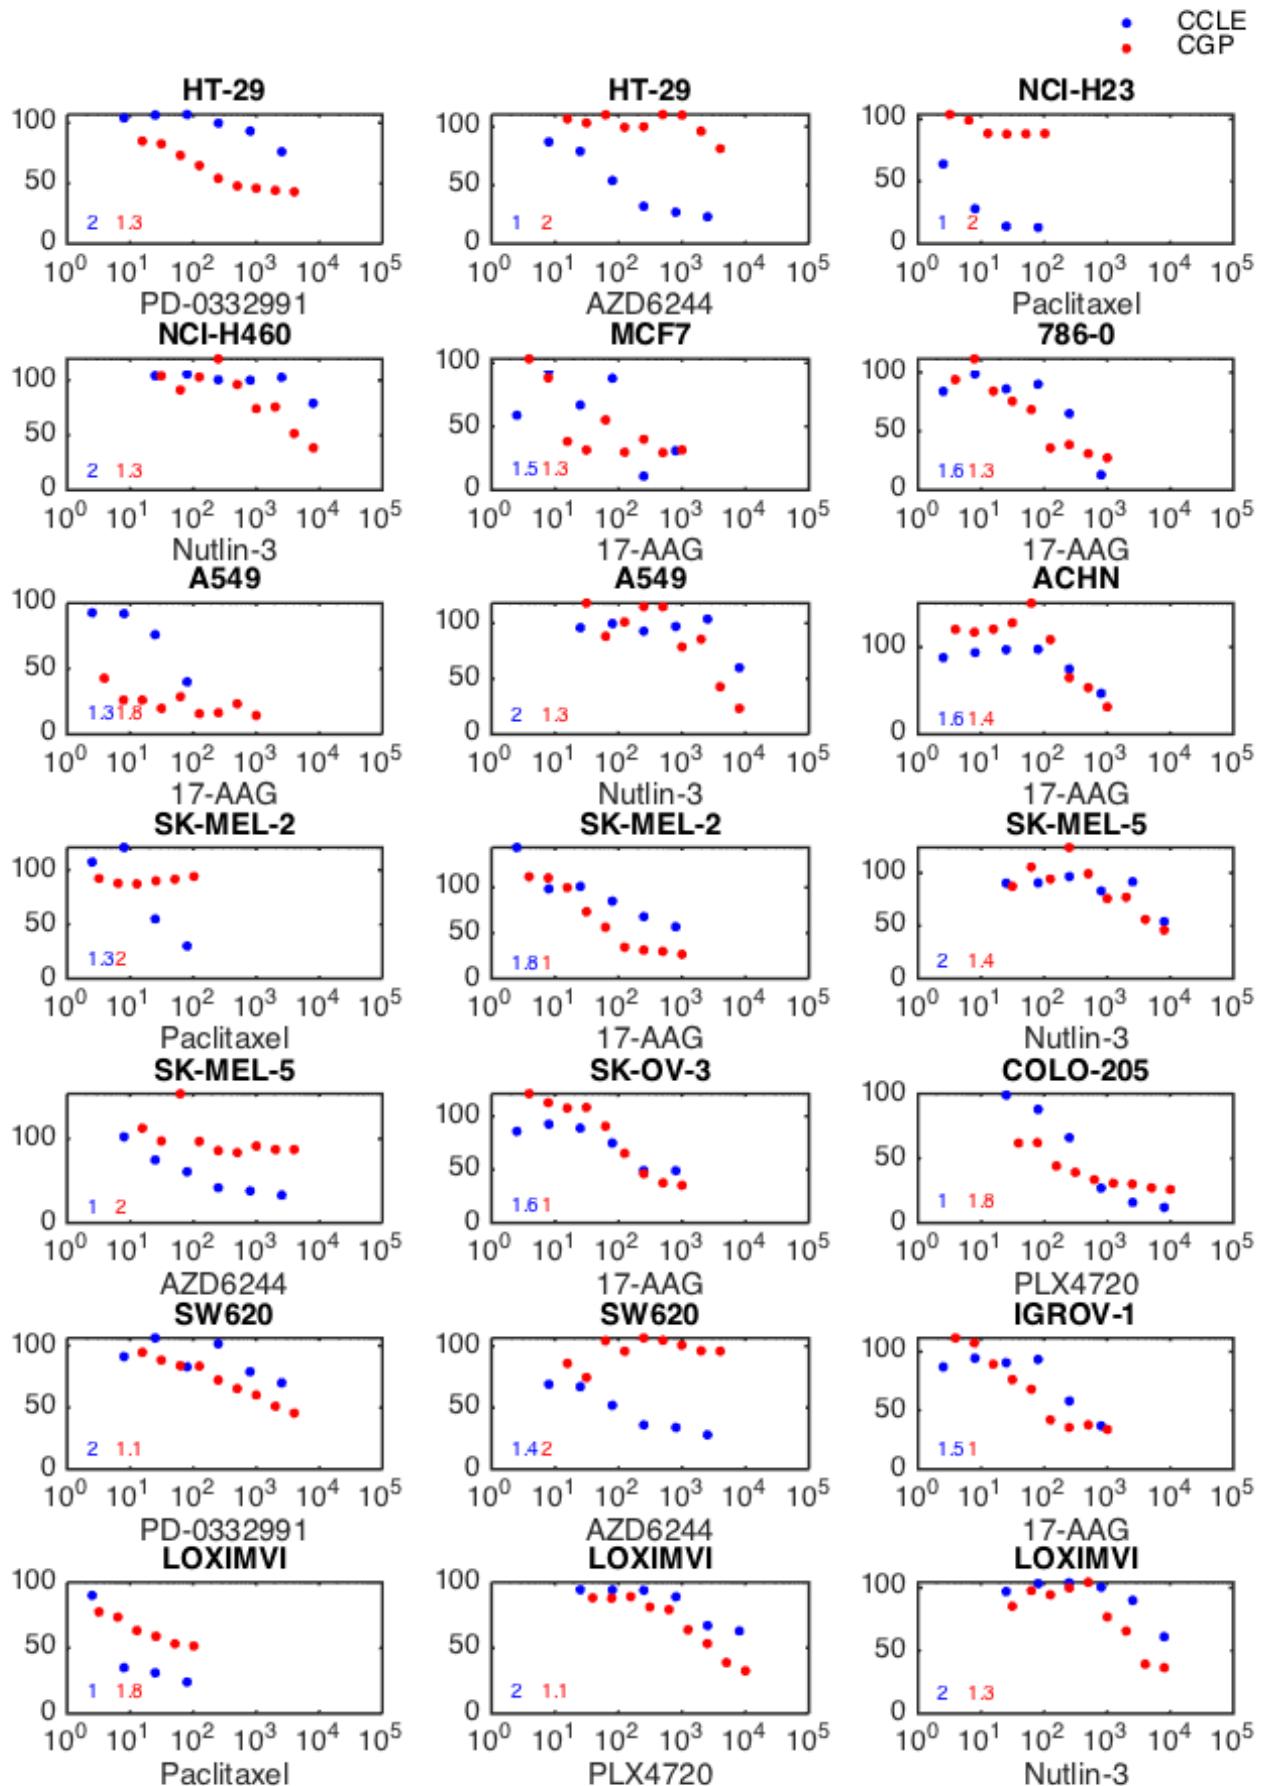

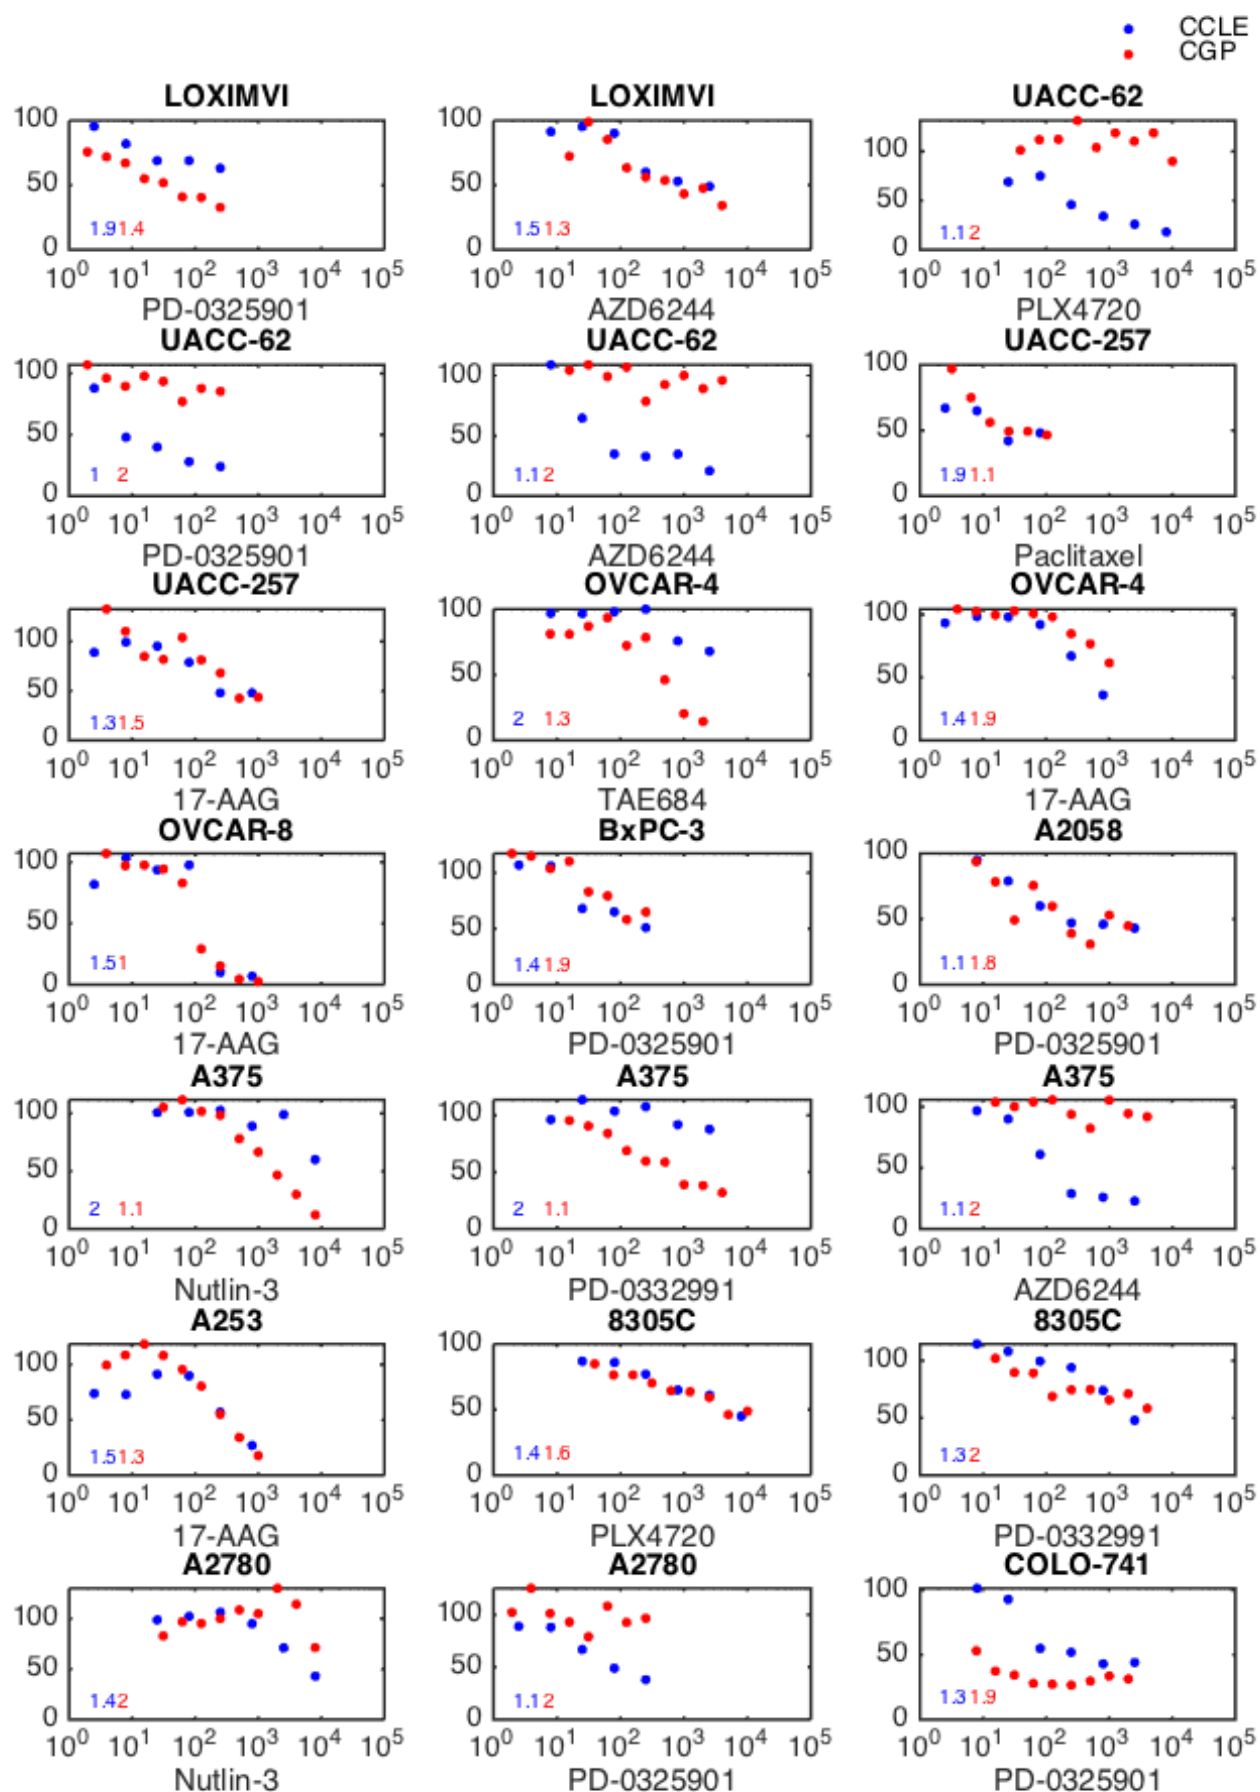

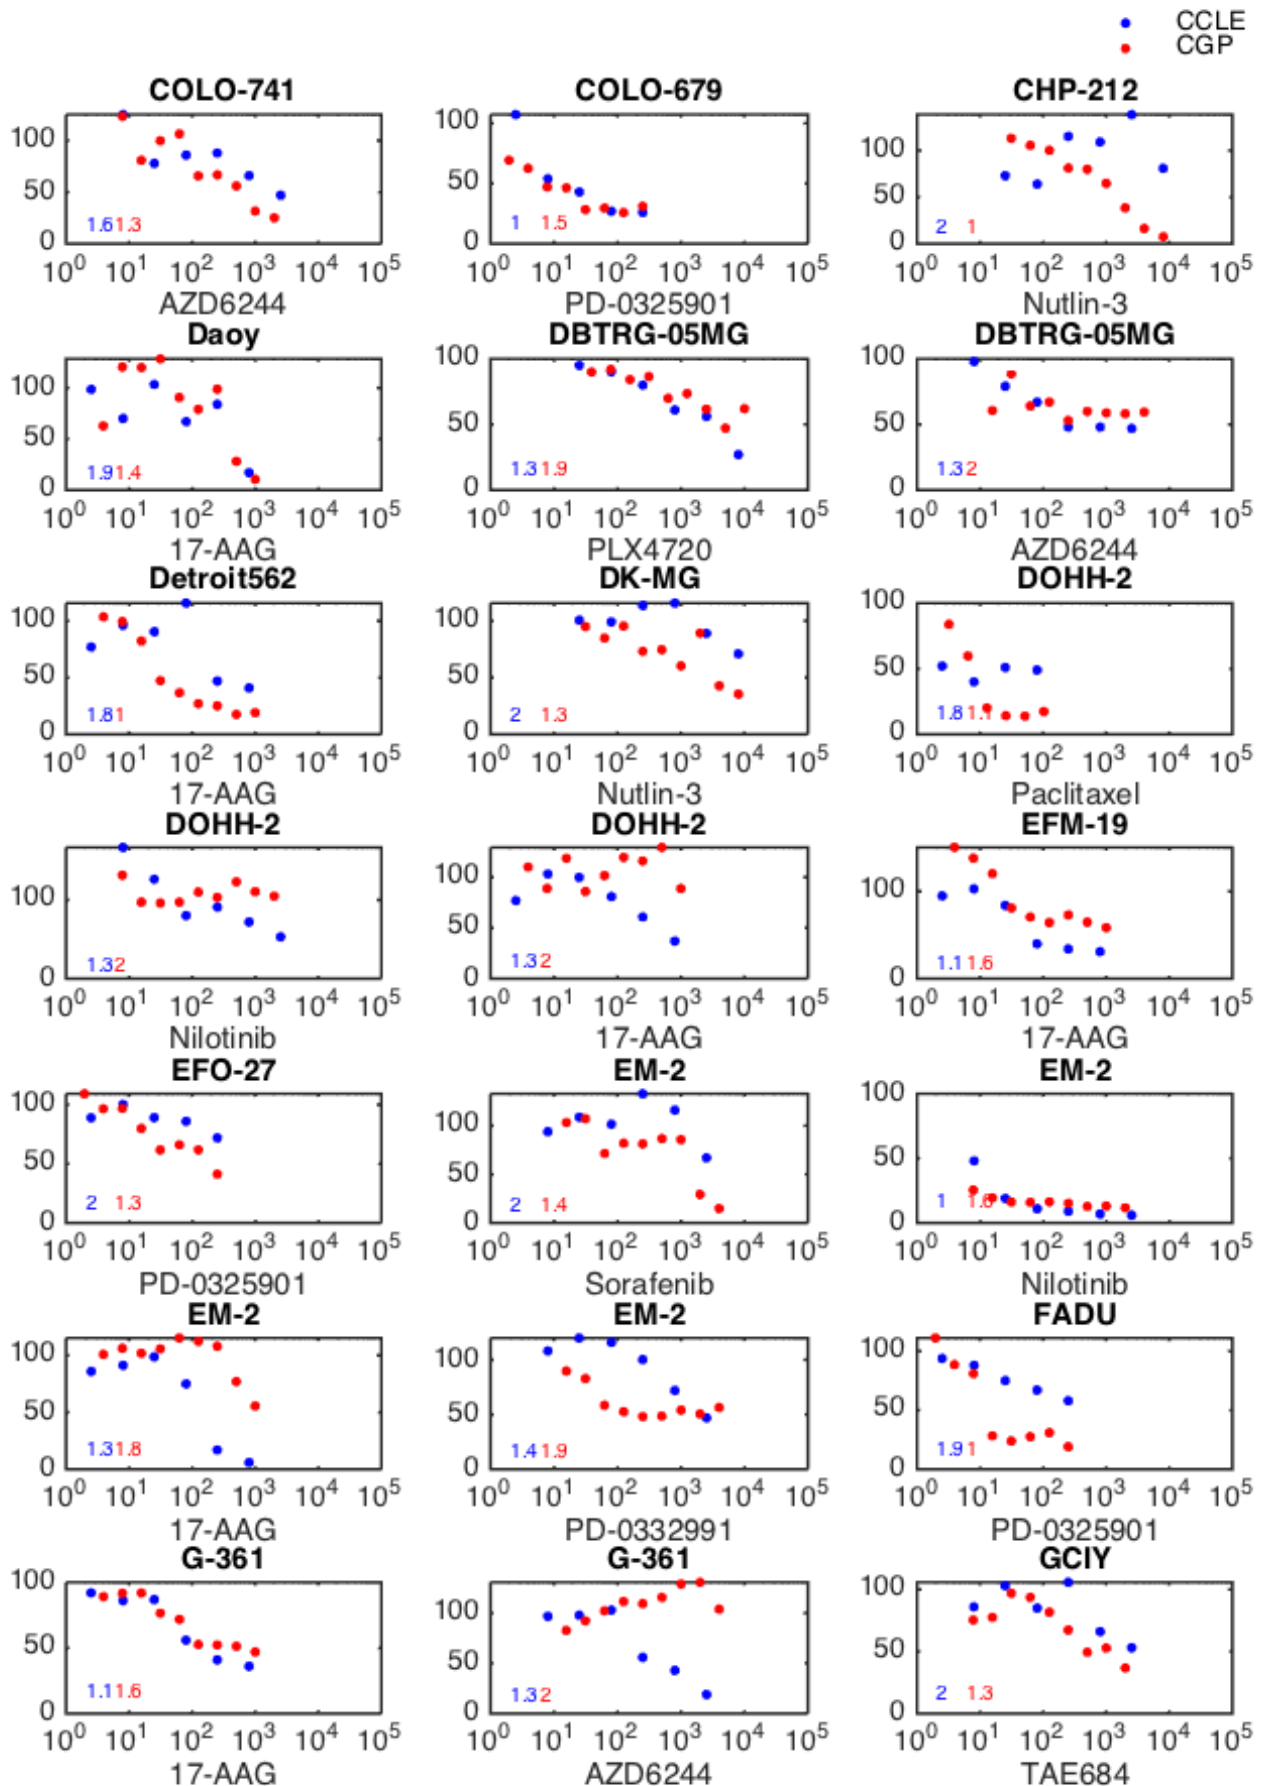

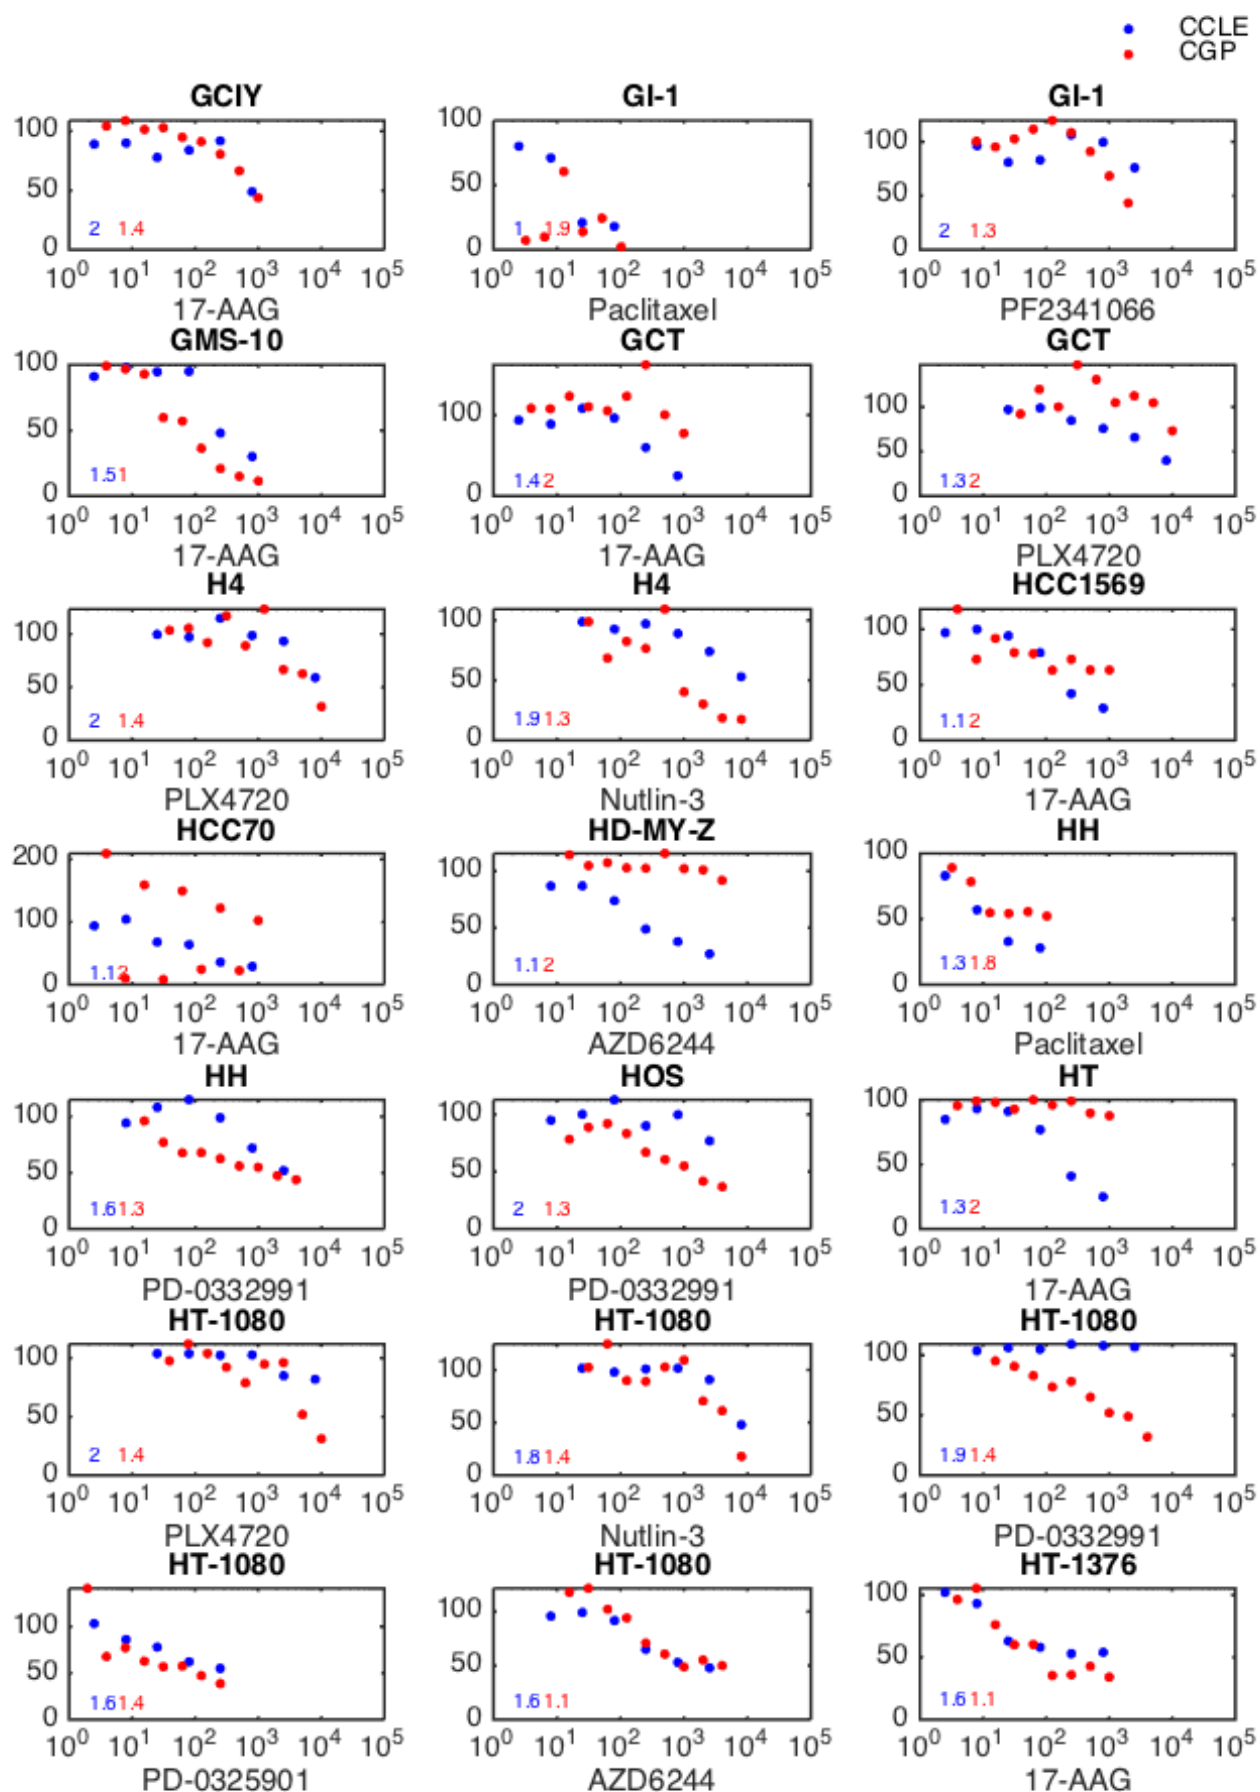

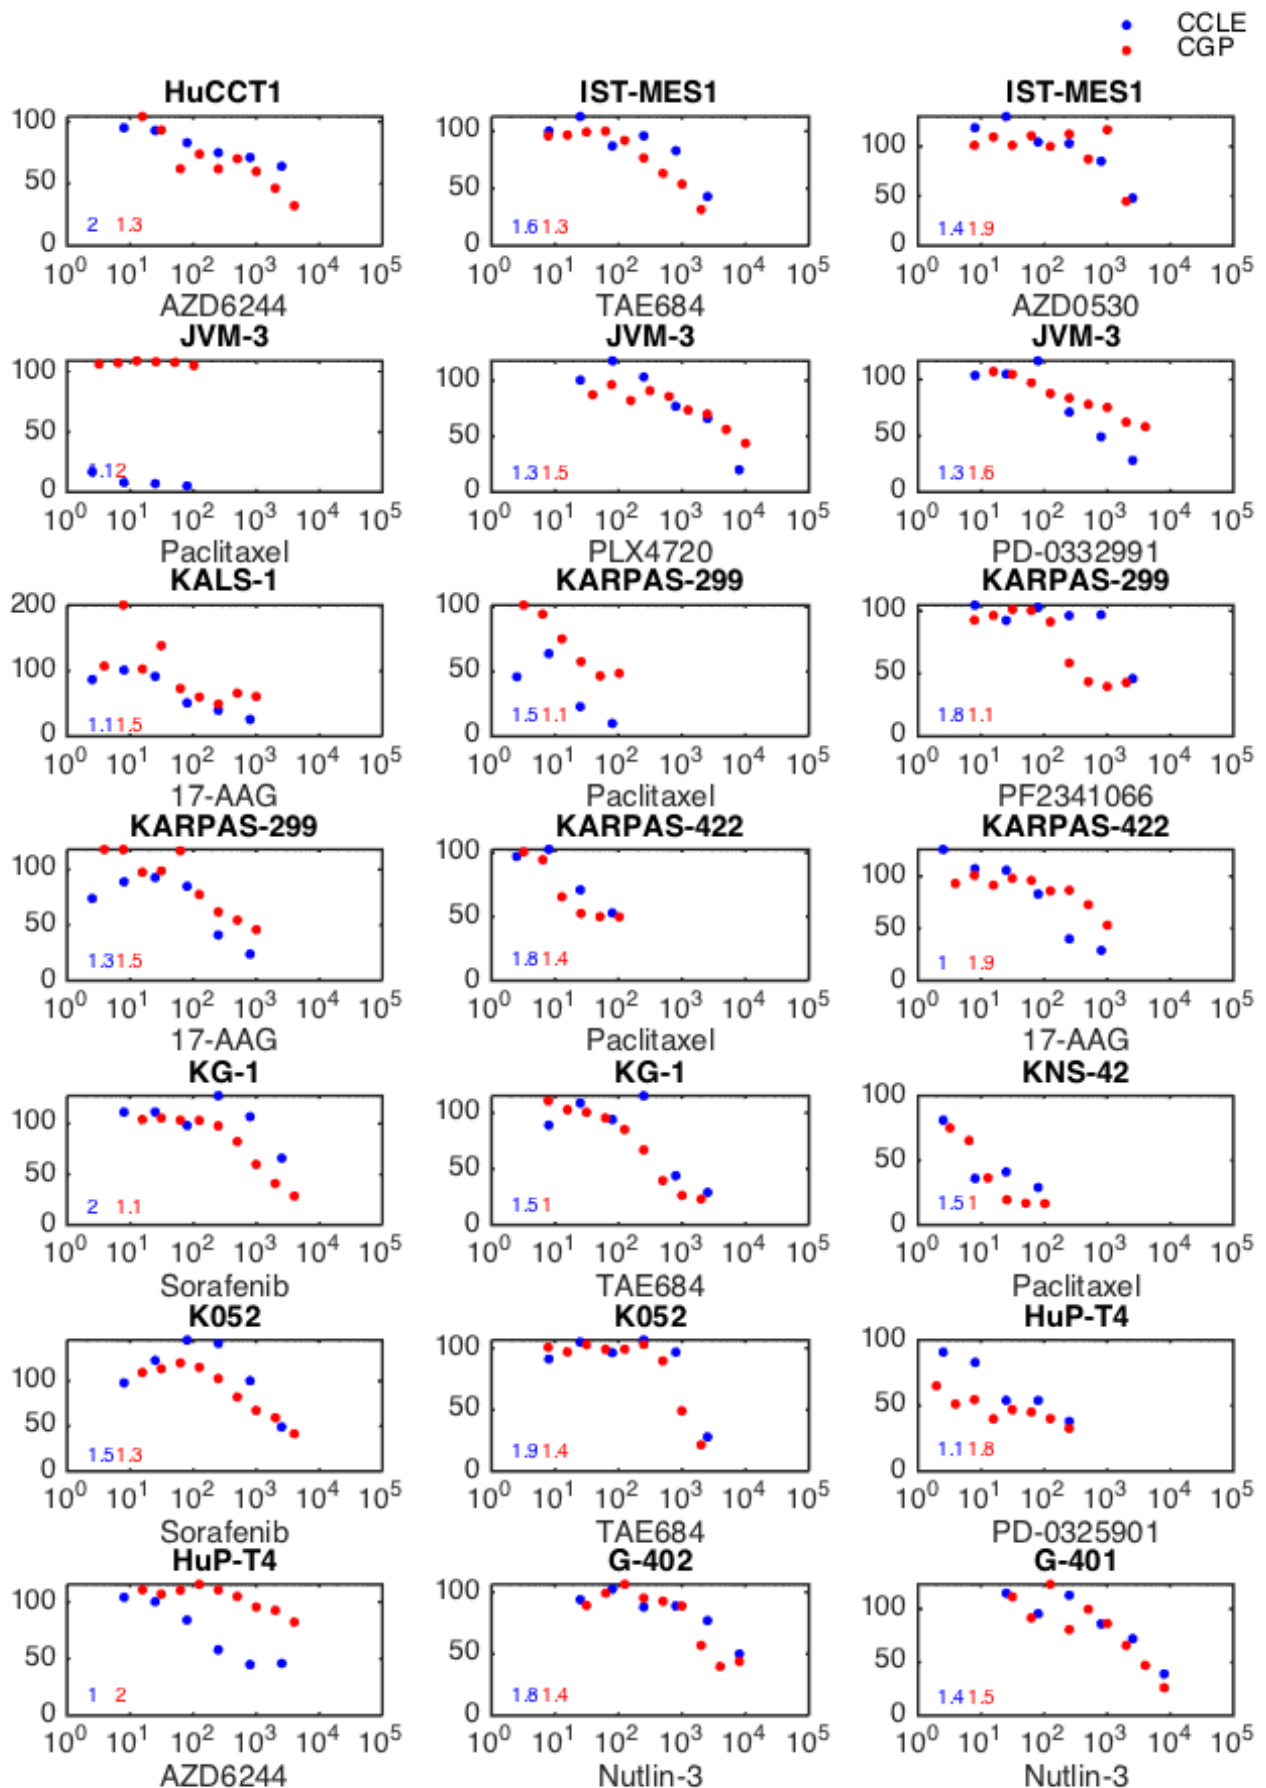



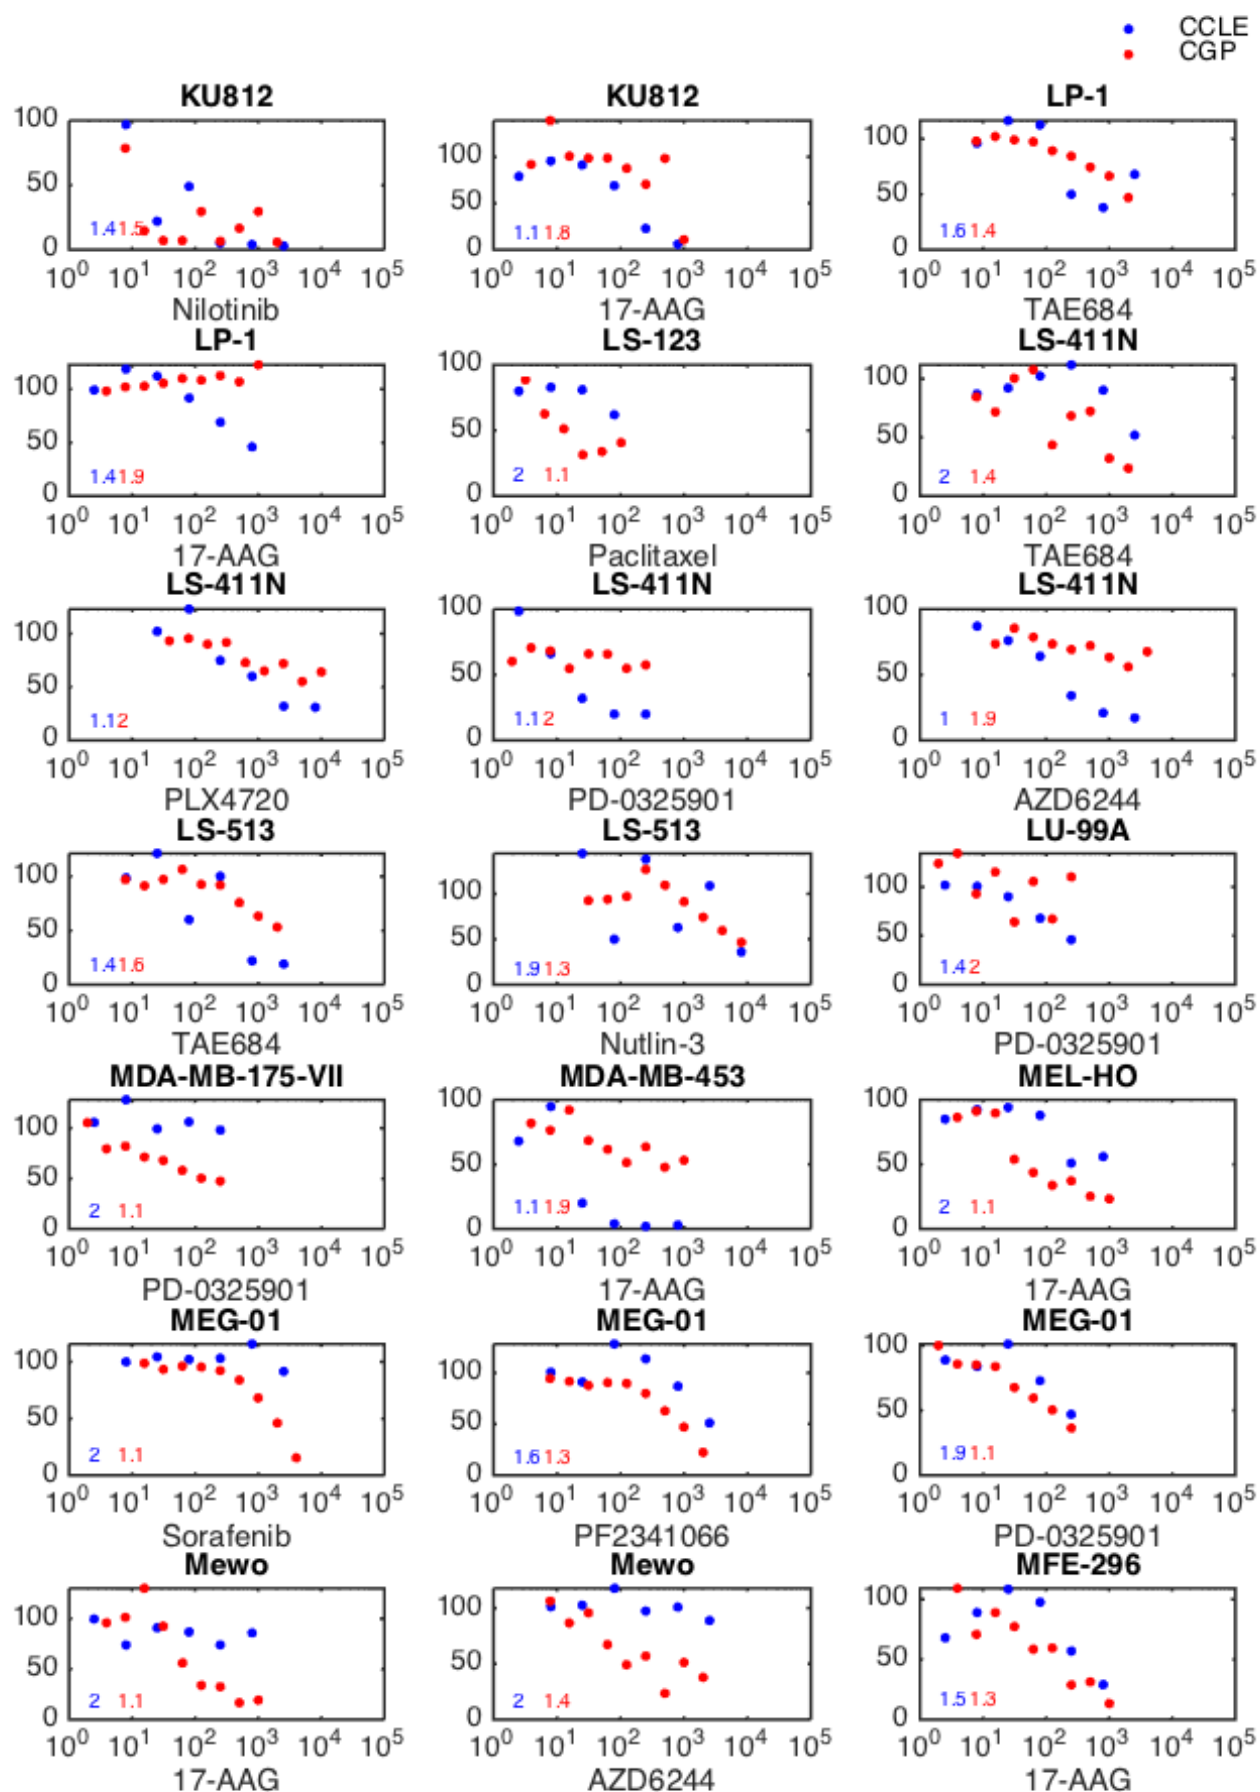

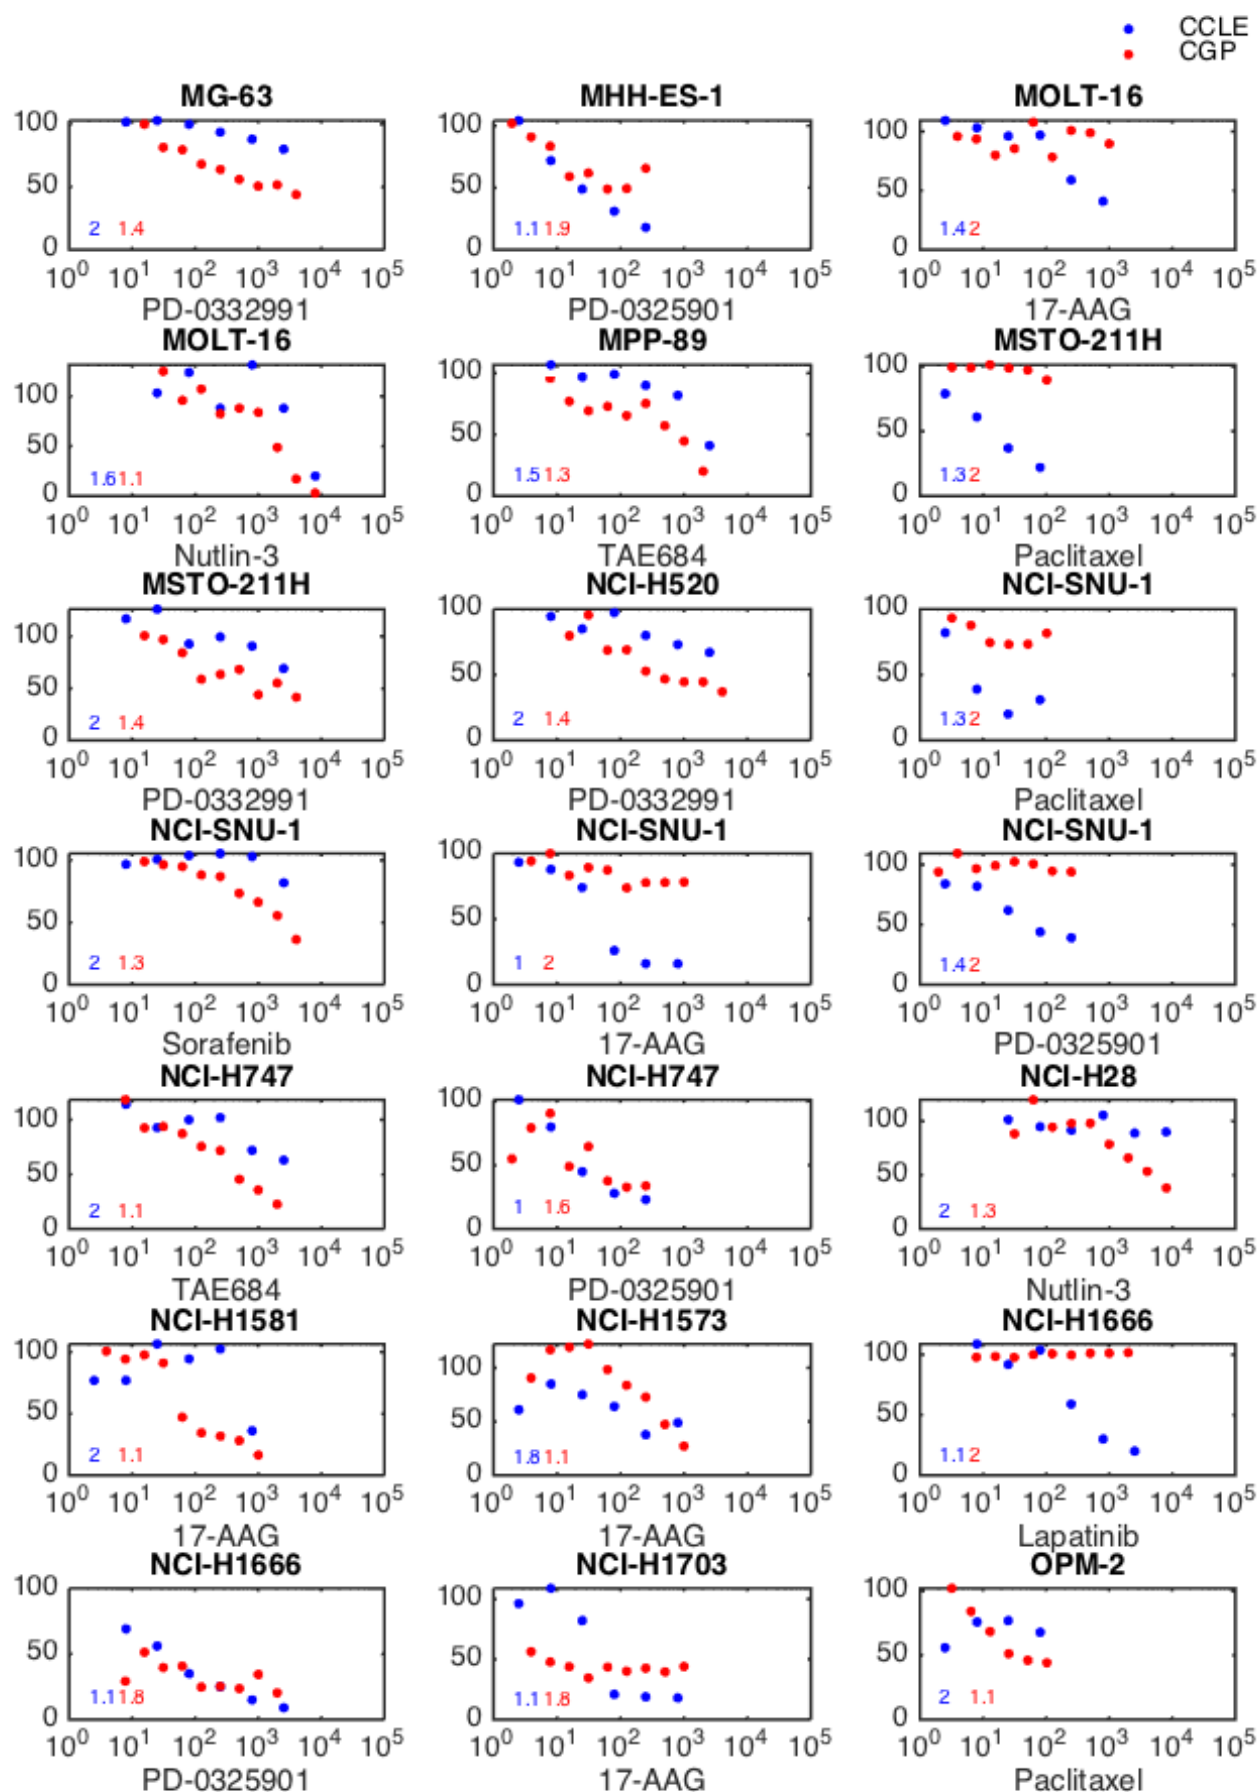

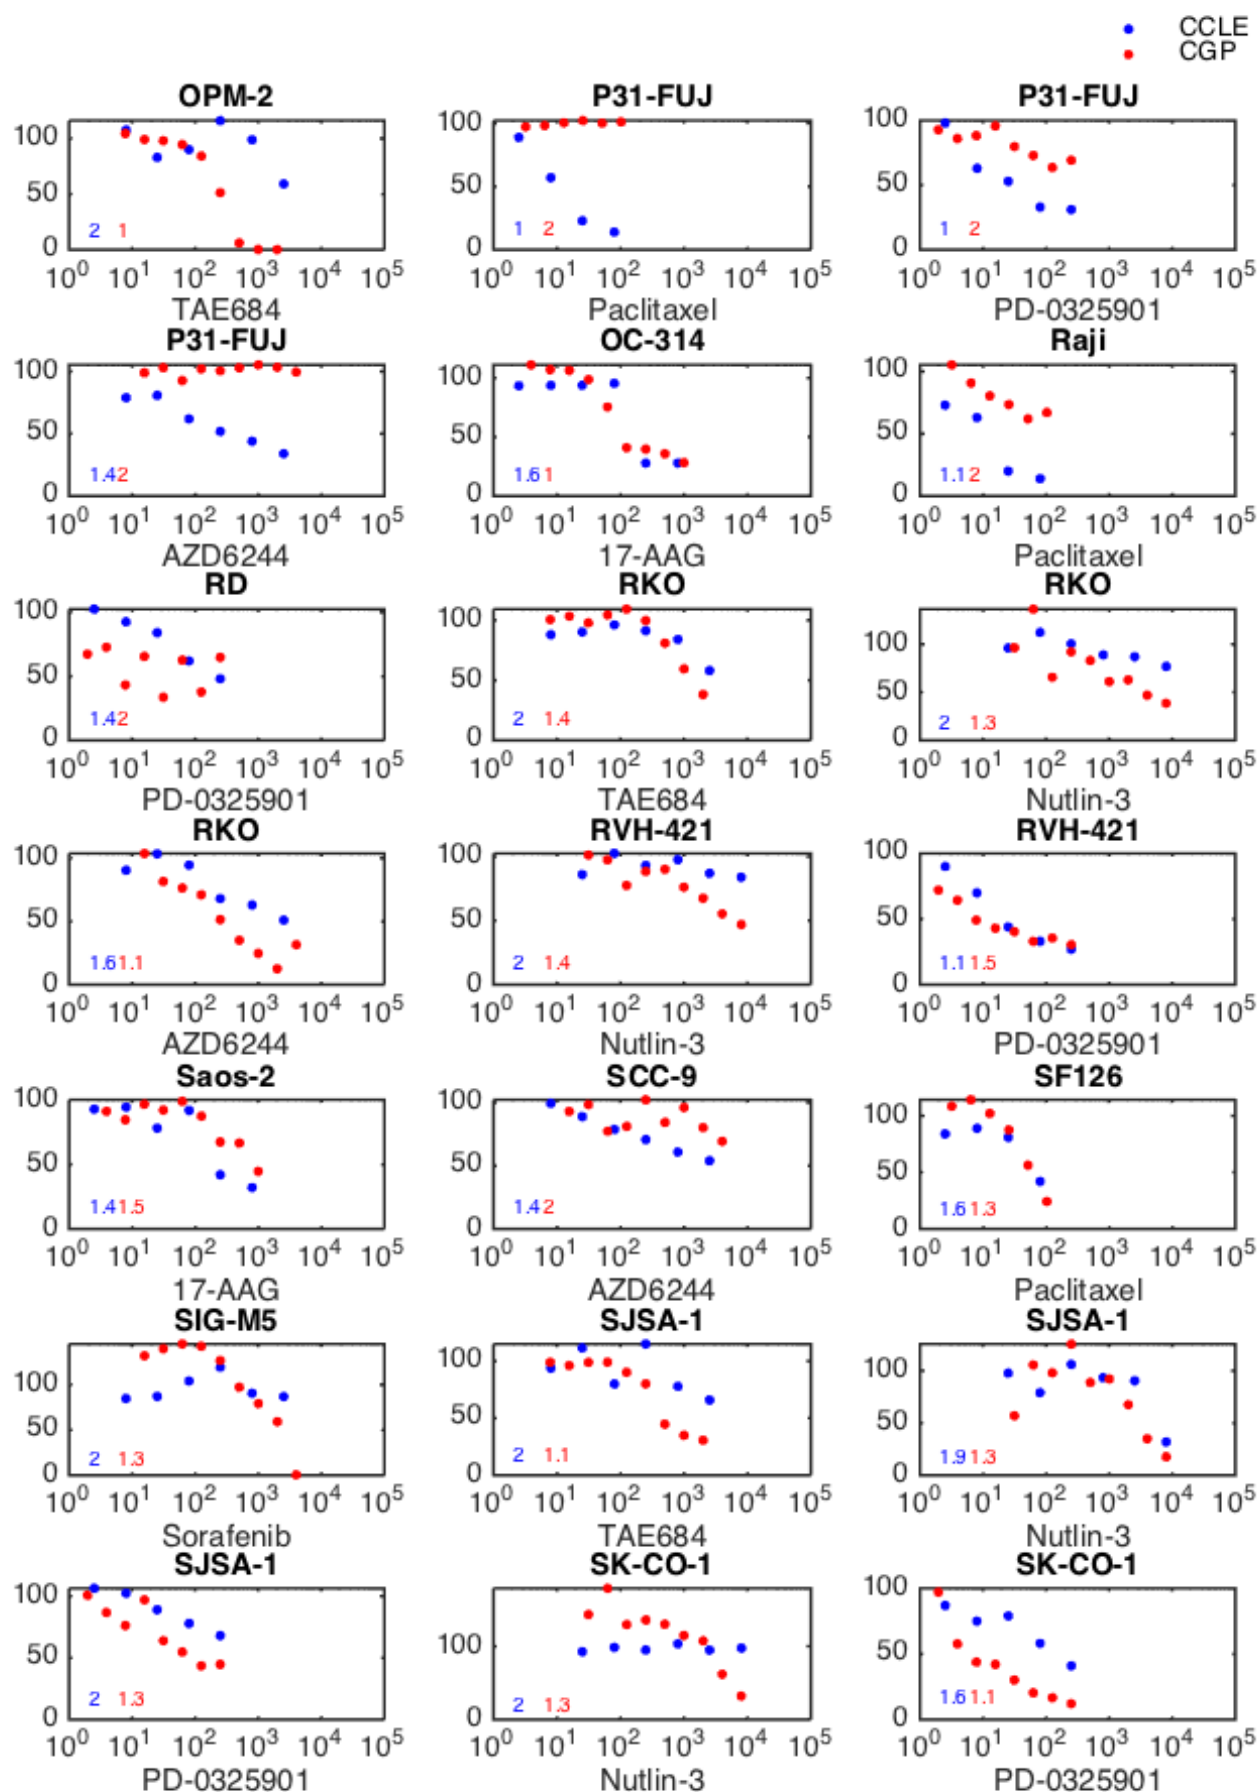

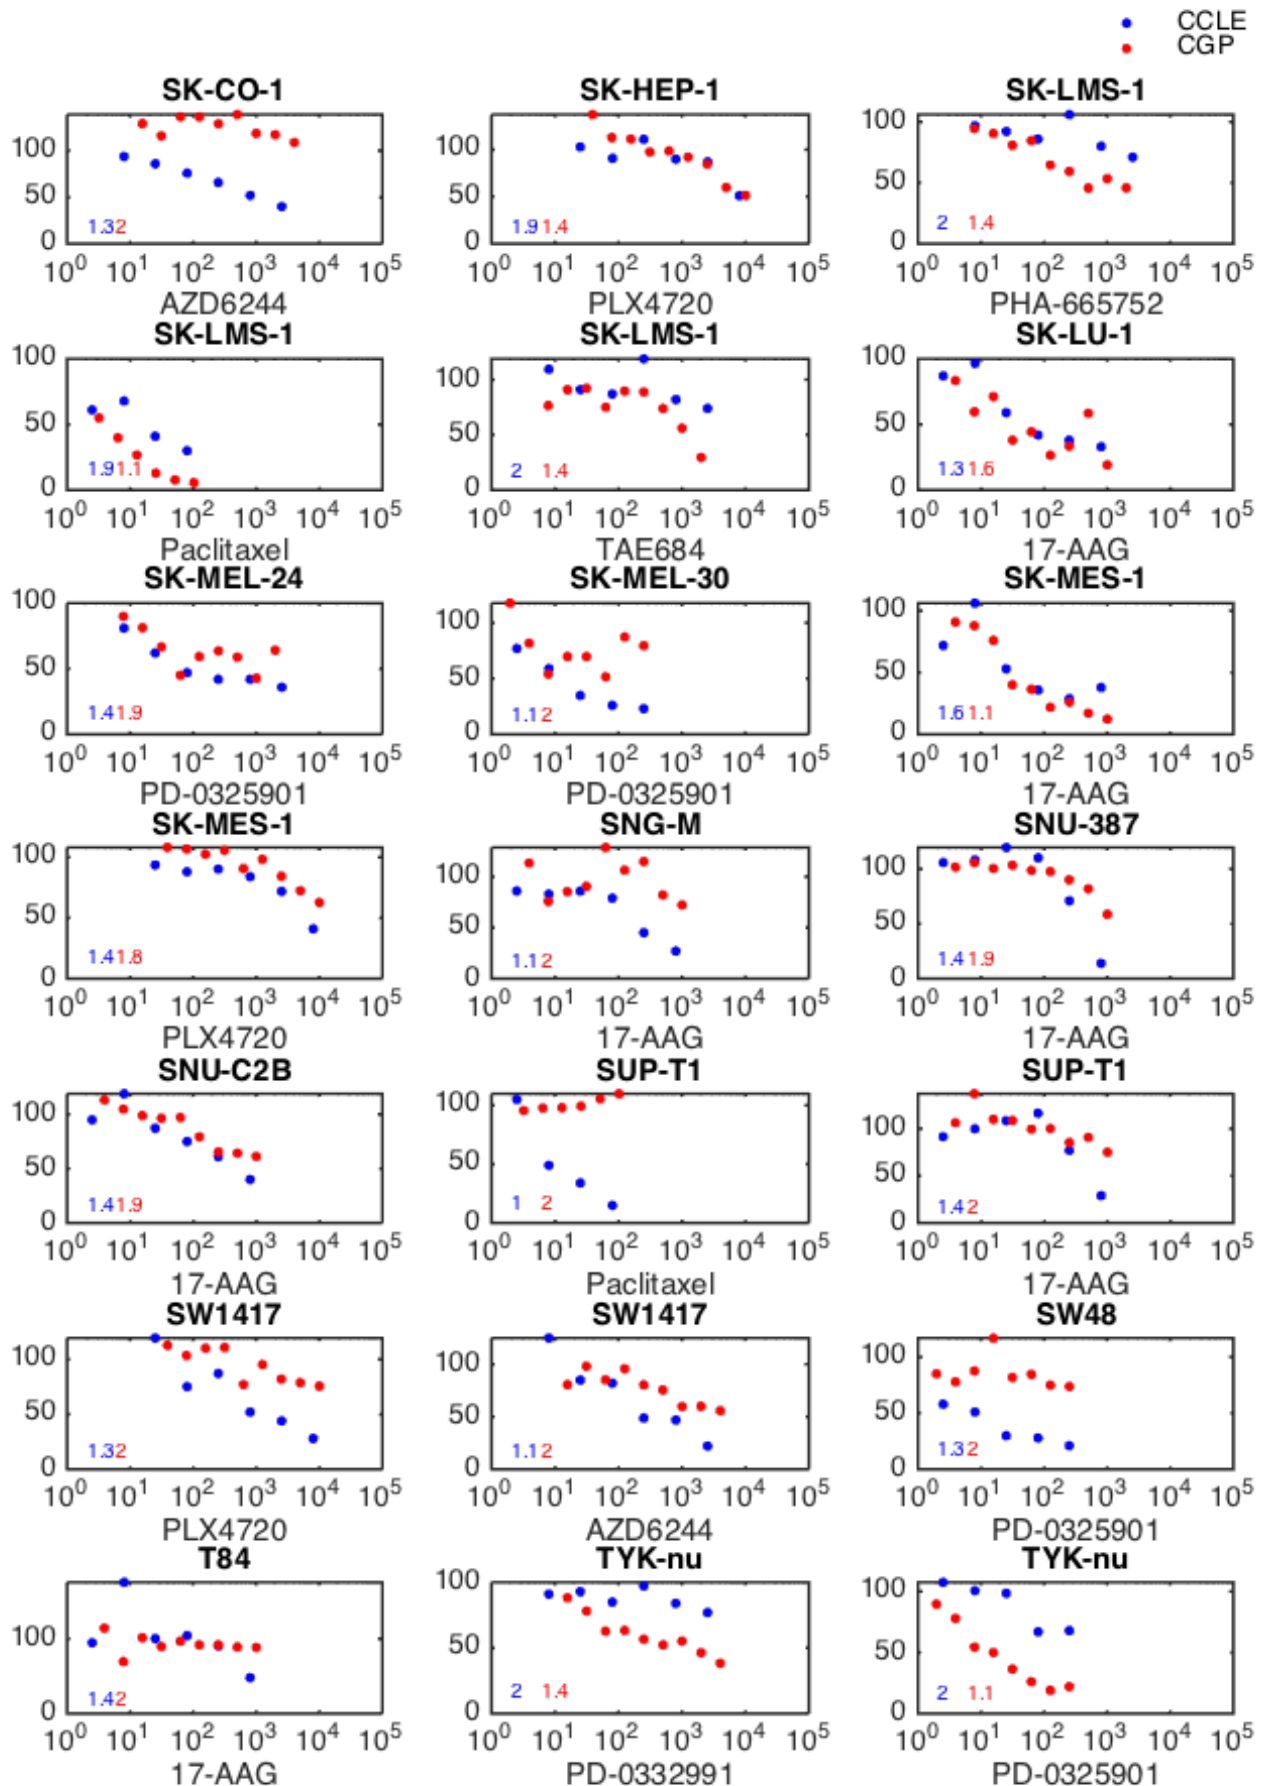

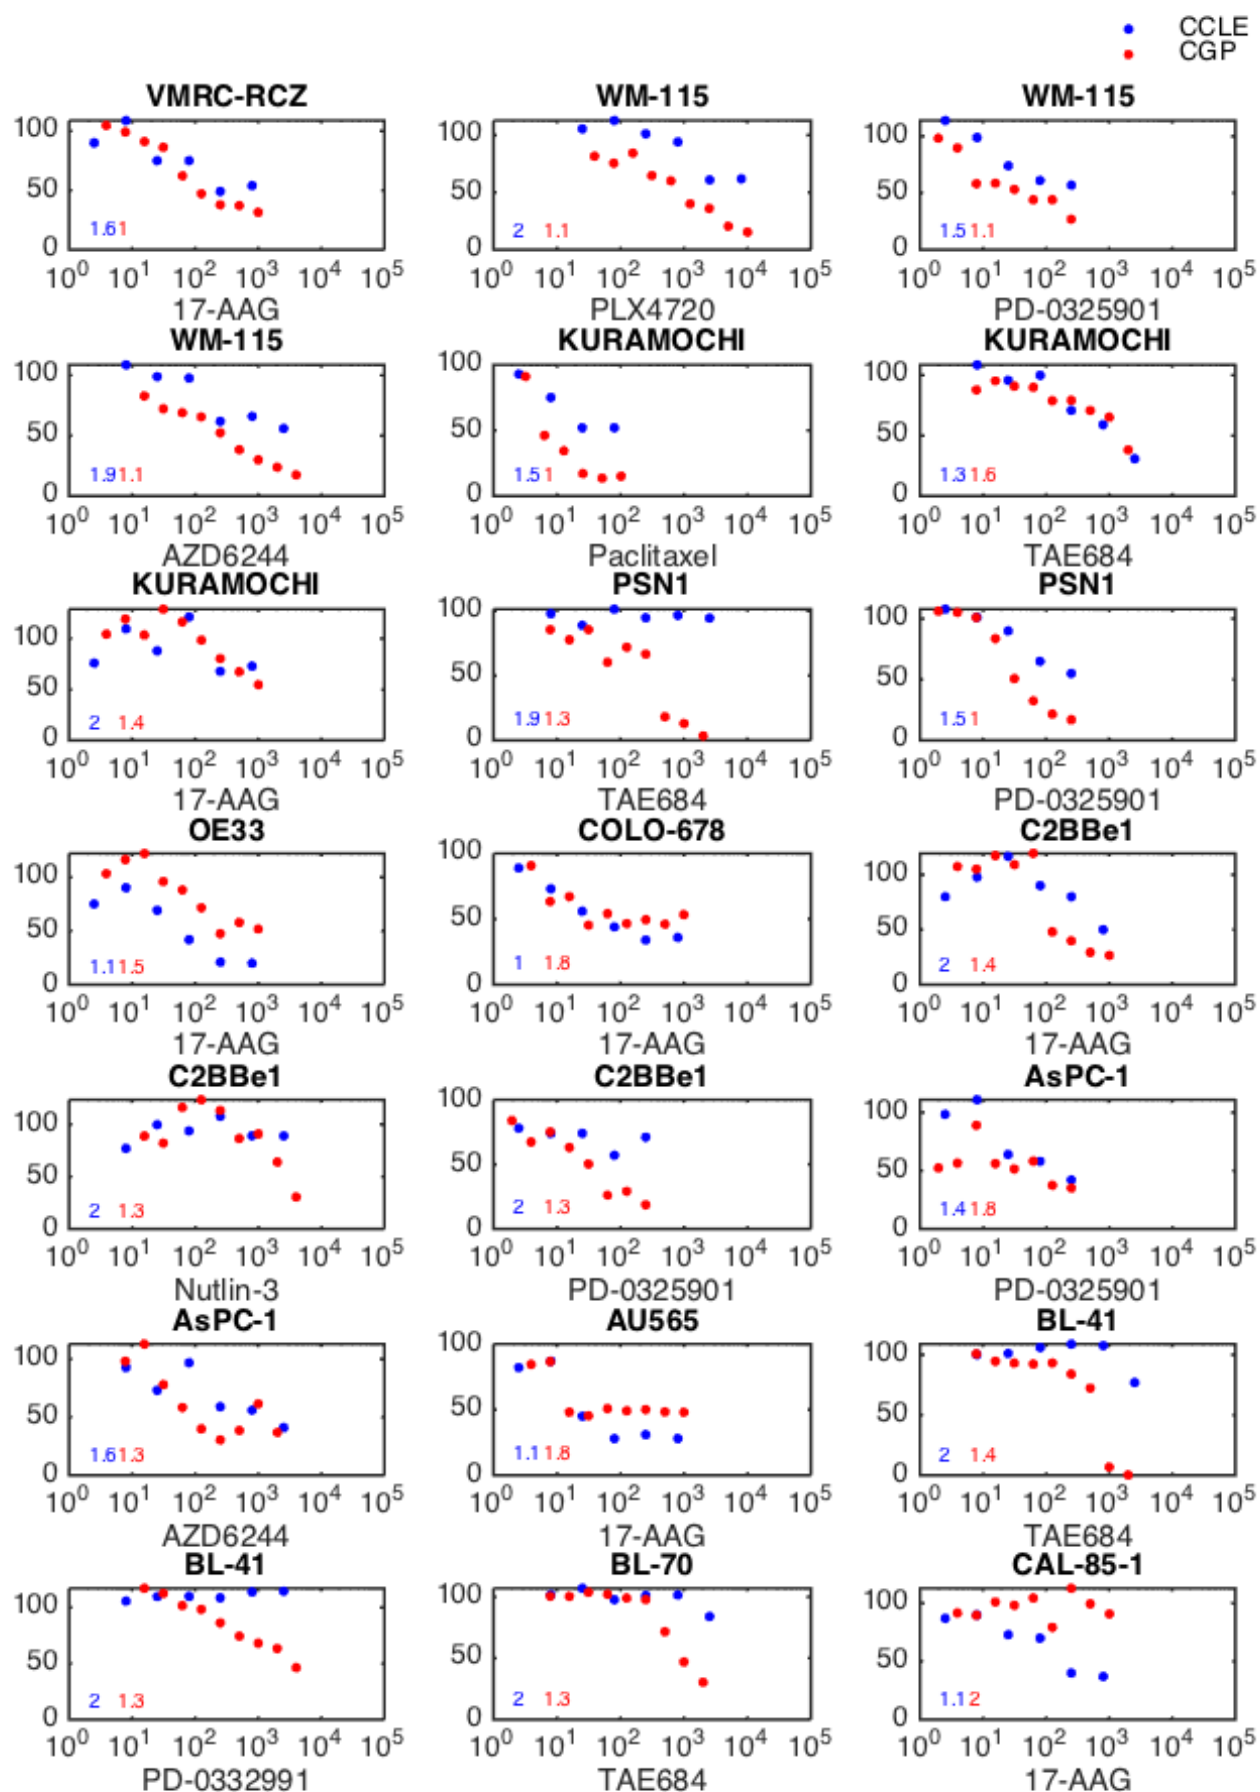

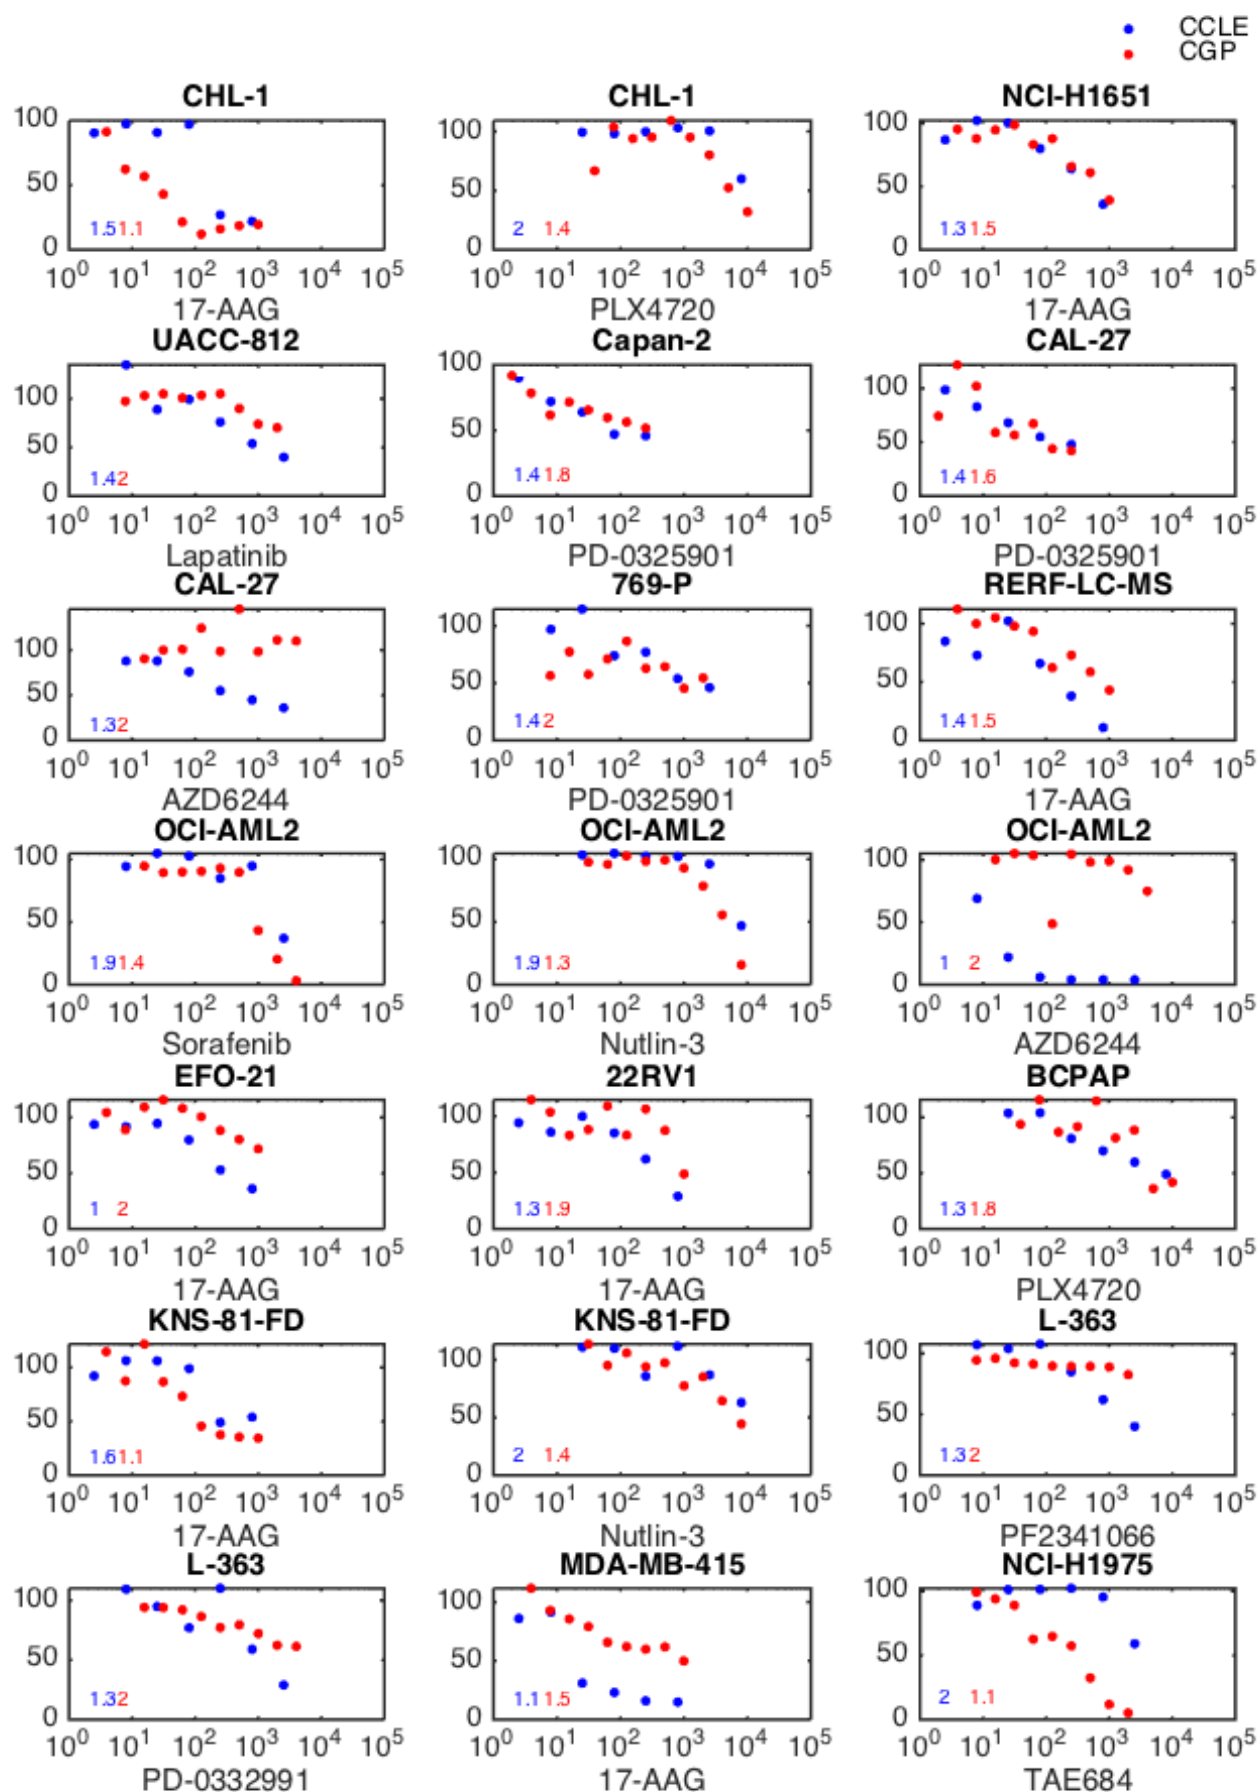

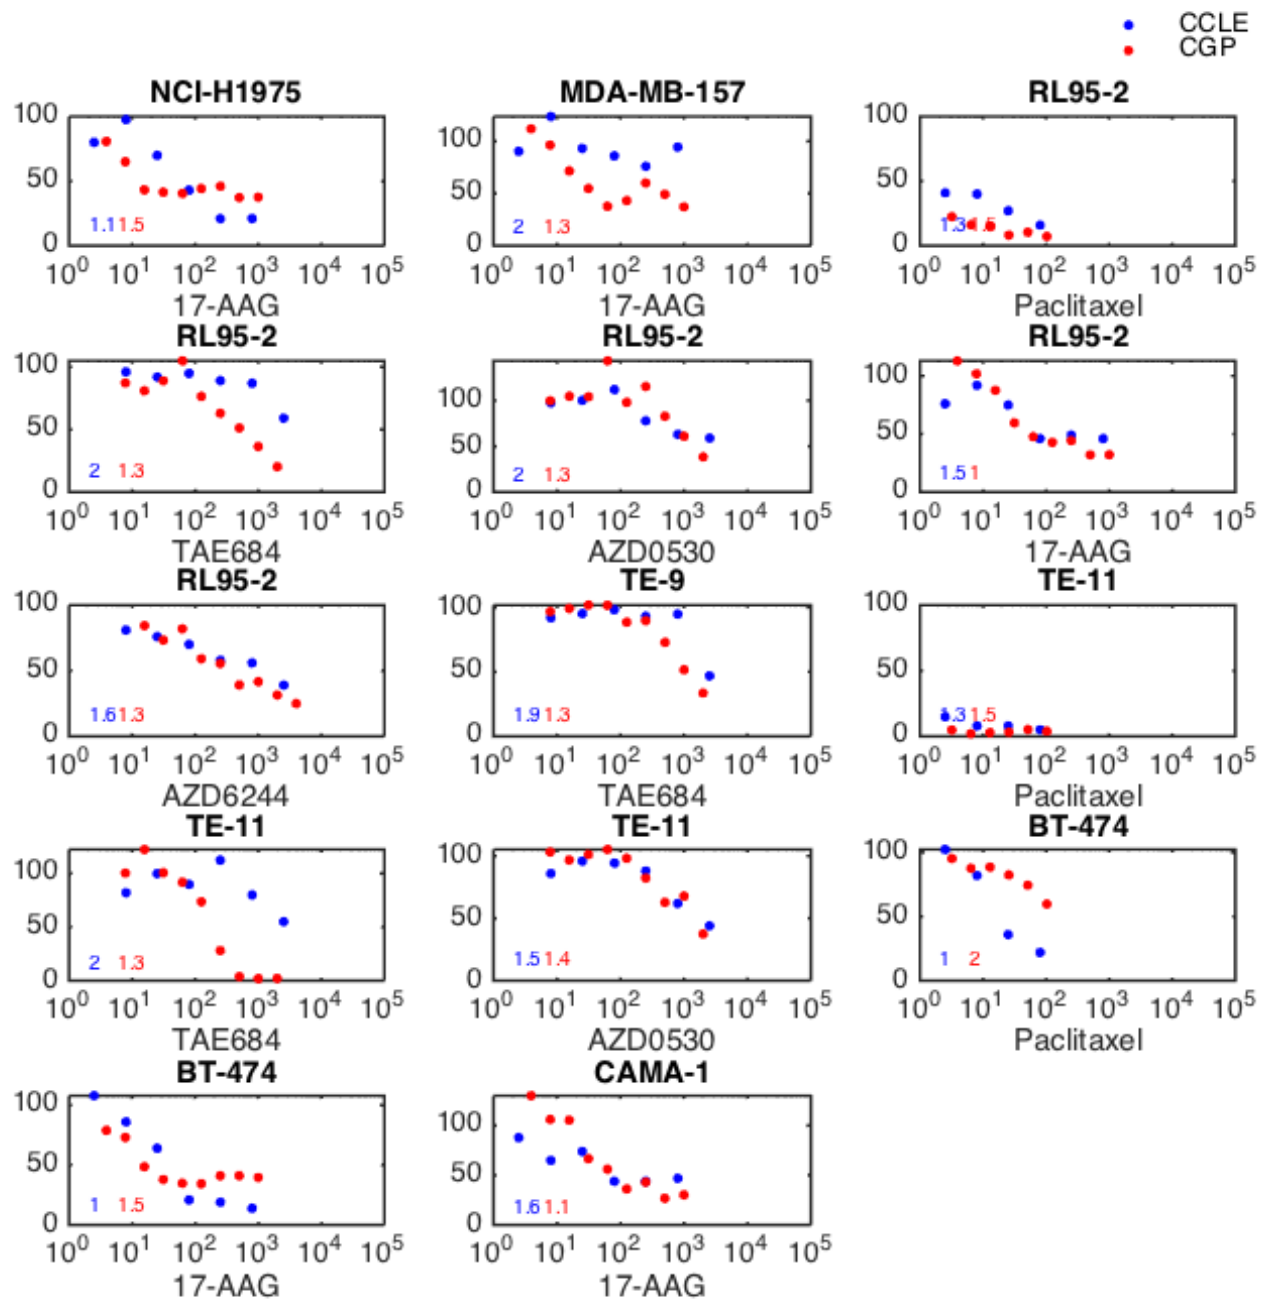

Supplement: NIHMS888276-supplement-Discrepant_Curves.pdf [file NIHMS888276-supplement-Discrepant_Curves.pdf]
